# Supplementary material for: BAZ2A-RNA mediated association with TOP2A and KDM1A represses genes implicated in prostate cancer
Source: Life Sci Alliance. 2023 Apr 25;6(7):e202301950. doi: 10.26508/lsa.202301950 (PMC10130768; doi:10.26508/lsa.202301950)
Supplement: Supplementary file 4 [file LSA-2023-01950_TableS2.xlsx]

## Sheet: GO  upregulated in Delta-TAM
GO terms of upregulated genes in PC3+BAZ2A-DTAM	PValue	Genes
GO:0009888~tissue development	8.30402e-05	XDH, EGR2, PDGFB, FAM20A, USP2, PLXNA2, PGF, NR4A1, SNAI1, HES1, DUSP1, IRF6, FOXC2, SGCD, ASB2, BCOR, WNT7A, RUNX3, CSF1R
GO:0002040~sprouting angiogenesis	0.000154757	PGF, CCBE1, FOXC2, NR4A1, ESM1
GO:0050678~regulation of epithelial cell proliferation	0.000155375	XDH, HES1, PDGFB, EPPK1, PGF, NR4A1, WNT7A, RUNX3
GO:0050673~epithelial cell proliferation	0.000376896	XDH, PDGFB, EPPK1, IRF6, PGF, NR4A1, WNT7A, RUNX3
GO:0007169~transmembrane receptor protein tyrosine kinase signaling pathway	0.000831367	XDH, FAM83A, PDGFB, PGF, CSRNP1, CCBE1, LCK, FOXC2, ESM1, CSF1R
GO:0072359~circulatory system development	0.000924504	XDH, HES1, PDGFB, PGF, CCBE1, SGCD, FOXC2, NR4A1, ESM1, BCOR, WNT7A, SNAI1
GO:0072358~cardiovascular system development	0.000924504	XDH, HES1, PDGFB, PGF, CCBE1, SGCD, FOXC2, NR4A1, ESM1, BCOR, WNT7A, SNAI1
GO:0048513~animal organ development	0.00103253	XDH, EGR2, PDGFB, FAM20A, USP2, PLXNA2, CRYAB, PGF, NR4A1, SNAI1, HES1, IRF6, CRISPLD2, CSRNP1, HOXA6, LCK, CCBE1, FOXC2, SGCD, ASB2, BCOR, WNT7A, RUNX3, CSF1R
GO:0007389~pattern specification process	0.00144149	HES1, EGR2, PLXNA2, HOXA6, FOXC2, BCOR, WNT7A, SNAI1
GO:0001568~blood vessel development	0.00164853	XDH, HES1, PDGFB, PGF, CCBE1, FOXC2, NR4A1, ESM1, WNT7A
GO:0003002~regionalization	0.00168993	HES1, EGR2, PLXNA2, HOXA6, FOXC2, WNT7A, SNAI1
GO:0016477~cell migration	0.00175786	HES1, PDGFB, EPPK1, CD177, PLXNA2, PGF, CCBE1, LCK, FOXC2, NR4A1, WNT7A, SNAI1, CSF1R
GO:0040011~locomotion	0.00184873	EGR2, EPPK1, PDGFB, PGF, PLXNA2, NR4A1, SNAI1, HES1, CD177, LCK, CCBE1, FOXC2, WNT7A, SPTB, CSF1R
GO:0010631~epithelial cell migration	0.00188192	PDGFB, EPPK1, CCBE1, FOXC2, NR4A1, WNT7A
GO:0061061~muscle structure development	0.00189655	HES1, EGR2, PDGFB, USP2, CRYAB, SGCD, FOXC2, NR4A1, ASB2
GO:0090132~epithelium migration	0.00199245	PDGFB, EPPK1, CCBE1, FOXC2, NR4A1, WNT7A
GO:0090130~tissue migration	0.00222769	PDGFB, EPPK1, CCBE1, FOXC2, NR4A1, WNT7A
GO:0010595~positive regulation of endothelial cell migration	0.00231868	PDGFB, CCBE1, FOXC2, WNT7A
GO:0001944~vasculature development	0.00235886	XDH, HES1, PDGFB, PGF, CCBE1, FOXC2, NR4A1, ESM1, WNT7A
GO:0048514~blood vessel morphogenesis	0.00281928	XDH, HES1, PGF, CCBE1, FOXC2, NR4A1, ESM1, WNT7A
GO:0007517~muscle organ development	0.00288035	EGR2, USP2, CRYAB, SGCD, FOXC2, NR4A1, ASB2
GO:0043542~endothelial cell migration	0.0029843	PDGFB, CCBE1, FOXC2, NR4A1, WNT7A
GO:0007167~enzyme linked receptor protein signaling pathway	0.00346946	XDH, HES1, FAM83A, PDGFB, PGF, CSRNP1, CCBE1, LCK, FOXC2, ESM1, CSF1R
GO:0072012~glomerulus vasculature development	0.00354204	HES1, PDGFB, FOXC2
GO:0044707~single-multicellular organism process	0.00376617	XDH, PDGFB, USP2, TACR2, PGF, PLXNA2, FAM20A, ESM1, PRRX2, DAGLA, CRISPLD2, CD177, HOXA6, CCBE1, BCOR, ANGPTL2, RUNX3, CSF1R, EGR2, EPPK1, CRYAB, NR4A1, SNAI1, HES1, DUSP1, IRF6, CSRNP1, LCK, SGCD, FOXC2, MUC5AC, ASB2, SCARA5, WNT7A, SPTB
GO:0009653~anatomical structure morphogenesis	0.00410022	XDH, EGR2, FAM20A, PLXNA2, CRYAB, PGF, NR4A1, ESM1, SNAI1, HES1, DUSP1, CRISPLD2, CSRNP1, HOXA6, CCBE1, FOXC2, BCOR, WNT7A, SPTB, CSF1R
GO:0010632~regulation of epithelial cell migration	0.00416012	PDGFB, EPPK1, CCBE1, FOXC2, WNT7A
GO:0061440~kidney vasculature development	0.00417919	HES1, PDGFB, FOXC2
GO:0061437~renal system vasculature development	0.00417919	HES1, PDGFB, FOXC2
GO:0030335~positive regulation of cell migration	0.00418556	PDGFB, PGF, CCBE1, FOXC2, WNT7A, SNAI1, CSF1R
GO:0060021~palate development	0.0043614	CSRNP1, BCOR, WNT7A, SNAI1
GO:0048646~anatomical structure formation involved in morphogenesis	0.00437103	HES1, EGR2, DUSP1, FAM20A, PLXNA2, PGF, CCBE1, FOXC2, NR4A1, ESM1, WNT7A, SNAI1
GO:0051674~localization of cell	0.00458258	HES1, PDGFB, EPPK1, CD177, PLXNA2, PGF, CCBE1, LCK, FOXC2, NR4A1, WNT7A, SNAI1, CSF1R
GO:0048870~cell motility	0.00458258	HES1, PDGFB, EPPK1, CD177, PLXNA2, PGF, CCBE1, LCK, FOXC2, NR4A1, WNT7A, SNAI1, CSF1R
GO:0030334~regulation of cell migration	0.00477418	PDGFB, EPPK1, PLXNA2, PGF, CCBE1, FOXC2, WNT7A, SNAI1, CSF1R
GO:0042060~wound healing	0.00484649	PDGFB, EPPK1, CD177, LCK, AHNAK2, FOXC2, WNT7A, SCARA5
GO:2000147~positive regulation of cell motility	0.00495324	PDGFB, PGF, CCBE1, FOXC2, WNT7A, SNAI1, CSF1R
GO:0007275~multicellular organism development	0.00538749	XDH, PDGFB, USP2, PGF, PLXNA2, FAM20A, ESM1, PRRX2, DAGLA, CRISPLD2, HOXA6, CCBE1, BCOR, ANGPTL2, RUNX3, CSF1R, EGR2, CRYAB, NR4A1, SNAI1, HES1, DUSP1, IRF6, CSRNP1, LCK, SGCD, FOXC2, ASB2, WNT7A, SPTB
GO:0051272~positive regulation of cellular component movement	0.00562574	PDGFB, PGF, CCBE1, FOXC2, WNT7A, SNAI1, CSF1R
GO:0040017~positive regulation of locomotion	0.00575487	PDGFB, PGF, CCBE1, FOXC2, WNT7A, SNAI1, CSF1R
GO:0001936~regulation of endothelial cell proliferation	0.00685292	XDH, PDGFB, PGF, NR4A1
GO:0035295~tube development	0.00696197	HES1, CRISPLD2, PLXNA2, PGF, CCBE1, FOXC2, WNT7A, CSF1R
GO:2000145~regulation of cell motility	0.00728476	PDGFB, EPPK1, PLXNA2, PGF, CCBE1, FOXC2, WNT7A, SNAI1, CSF1R
GO:0048731~system development	0.00738447	XDH, PDGFB, USP2, PGF, PLXNA2, FAM20A, ESM1, DAGLA, CRISPLD2, HOXA6, CCBE1, BCOR, RUNX3, CSF1R, EGR2, CRYAB, NR4A1, SNAI1, HES1, IRF6, CSRNP1, LCK, SGCD, FOXC2, ASB2, WNT7A, SPTB
GO:0006928~movement of cell or subcellular component	0.00783272	EGR2, EPPK1, PDGFB, PGF, PLXNA2, NR4A1, SNAI1, HES1, CD177, LCK, CCBE1, FOXC2, WNT7A, SPTB, CSF1R
GO:0010634~positive regulation of epithelial cell migration	0.00783679	PDGFB, CCBE1, FOXC2, WNT7A
GO:0001667~ameboidal-type cell migration	0.007915	PDGFB, EPPK1, CCBE1, FOXC2, NR4A1, WNT7A
GO:0040012~regulation of locomotion	0.00930704	PDGFB, EPPK1, PLXNA2, PGF, CCBE1, FOXC2, WNT7A, SNAI1, CSF1R
GO:0001935~endothelial cell proliferation	0.00980859	XDH, PDGFB, PGF, NR4A1
GO:0010594~regulation of endothelial cell migration	0.0100439	PDGFB, CCBE1, FOXC2, WNT7A
GO:0035924~cellular response to vascular endothelial growth factor stimulus	0.0104685	XDH, CCBE1, NR4A1
GO:0014706~striated muscle tissue development	0.0113749	EGR2, USP2, SGCD, FOXC2, NR4A1, ASB2
GO:0051270~regulation of cellular component movement	0.0118907	PDGFB, EPPK1, PLXNA2, PGF, CCBE1, FOXC2, WNT7A, SNAI1, CSF1R
GO:0009611~response to wounding	0.0124679	PDGFB, EPPK1, CD177, LCK, AHNAK2, FOXC2, WNT7A, SCARA5
GO:0061448~connective tissue development	0.0131922	PDGFB, FOXC2, WNT7A, SNAI1, RUNX3
GO:0061041~regulation of wound healing	0.0134035	PDGFB, EPPK1, FOXC2, SCARA5
GO:0060537~muscle tissue development	0.0137362	EGR2, USP2, SGCD, FOXC2, NR4A1, ASB2
GO:0009887~organ morphogenesis	0.01374	HES1, FAM20A, PGF, CSRNP1, HOXA6, FOXC2, BCOR, WNT7A, SNAI1, CSF1R
GO:1901342~regulation of vasculature development	0.0149482	XDH, PDGFB, PGF, CCBE1, FOXC2
GO:0044767~single-organism developmental process	0.0154795	XDH, PDGFB, USP2, PGF, PLXNA2, FAM20A, ESM1, PRRX2, DAGLA, CRISPLD2, HOXA6, CCBE1, BCOR, ANGPTL2, RUNX3, CSF1R, EGR2, EPPK1, CRYAB, NR4A1, SNAI1, HES1, DUSP1, IRF6, CSRNP1, LCK, SGCD, FOXC2, ASB2, WNT7A, SPTB
GO:0051241~negative regulation of multicellular organismal process	0.0159445	XDH, HES1, PDGFB, EPPK1, TACR2, USP2, FOXC2, BCOR, WNT7A, SNAI1
GO:0061005~cell differentiation involved in kidney development	0.0160388	HES1, PDGFB, FOXC2
GO:0072006~nephron development	0.0163741	HES1, PDGFB, PGF, FOXC2
GO:1904018~positive regulation of vasculature development	0.0179871	PDGFB, PGF, CCBE1, FOXC2
GO:0030902~hindbrain development	0.0186563	HES1, EGR2, PLXNA2, WNT7A
GO:0072144~glomerular mesangial cell development	0.0192075	PDGFB, FOXC2
GO:1903034~regulation of response to wounding	0.0193393	PDGFB, EPPK1, FOXC2, SCARA5
GO:0022603~regulation of anatomical structure morphogenesis	0.0193511	XDH, HES1, PLXNA2, PGF, CCBE1, FOXC2, BCOR, WNT7A, SNAI1, CSF1R
GO:0050896~response to stimulus	0.0196802	XDH, PDGFB, USP2, TACR2, PGF, PLXNA2, CYTH4, ESM1, CFP, DAGLA, FAM83A, CD177, CCBE1, AHNAK2, HCAR3, ANKDD1A, RUNX3, CSF1R, HTR1E, EGR2, EPPK1, GNB1L, CRYAB, PDXP, NR4A1, FOSB, SNAI1, SIGLEC16, HES1, DUSP1, IRF6, CSRNP1, GPR39, LCK, FOXC2, ASB2, MUC5AC, CD300LB, SCARA5, WNT7A, SPTB, CD300LD
GO:0006935~chemotaxis	0.0197275	EGR2, PDGFB, PLXNA2, PGF, NR4A1, CSF1R, SPTB
GO:0042330~taxis	0.0198846	EGR2, PDGFB, PLXNA2, PGF, NR4A1, CSF1R, SPTB
GO:0060429~epithelium development	0.020336	XDH, HES1, PDGFB, IRF6, PLXNA2, PGF, FOXC2, WNT7A, SNAI1, CSF1R
GO:0001525~angiogenesis	0.0217341	PGF, CCBE1, FOXC2, NR4A1, ESM1, WNT7A
GO:0072143~mesangial cell development	0.0230051	PDGFB, FOXC2
GO:0072008~glomerular mesangial cell differentiation	0.0230051	PDGFB, FOXC2
GO:0032502~developmental process	0.0231657	XDH, PDGFB, USP2, PGF, PLXNA2, FAM20A, ESM1, PRRX2, DAGLA, CRISPLD2, HOXA6, CCBE1, BCOR, ANGPTL2, RUNX3, CSF1R, EGR2, EPPK1, CRYAB, NR4A1, SNAI1, HES1, DUSP1, IRF6, CSRNP1, LCK, SGCD, FOXC2, ASB2, WNT7A, SPTB
GO:0065008~regulation of biological quality	0.0235392	XDH, EGR2, PDGFB, FAM20A, USP2, PLXNA2, TACR2, PDXP, DAGLA, KCNQ3, CD177, SYN2, LCK, FOXC2, NALCN, MUC5AC, CP, WNT7A, SCARA5, SPTB, CSF1R, HTR1E
GO:0051093~negative regulation of developmental process	0.0236975	XDH, HES1, PDGFB, USP2, FOXC2, BCOR, WNT7A, SNAI1
GO:0008283~cell proliferation	0.0244518	XDH, HES1, DAGLA, FAM83A, PDGFB, EPPK1, IRF6, PGF, NR4A1, FOXC2, ESM1, WNT7A, RUNX3, CSF1R
GO:0050679~positive regulation of epithelial cell proliferation	0.0245053	PDGFB, PGF, NR4A1, WNT7A
GO:0032835~glomerulus development	0.0247633	HES1, PDGFB, FOXC2
GO:0035914~skeletal muscle cell differentiation	0.0247633	EGR2, NR4A1, ASB2
GO:0000122~negative regulation of transcription from RNA polymerase II promoter	0.0251135	HES1, PDGFB, USP2, FOXC2, FOSB, BCOR, SNAI1, RUNX3
GO:0072007~mesangial cell differentiation	0.0267883	PDGFB, FOXC2
GO:0007519~skeletal muscle tissue development	0.0281829	EGR2, USP2, NR4A1, ASB2
GO:0048856~anatomical structure development	0.0282983	XDH, PDGFB, USP2, PGF, PLXNA2, FAM20A, ESM1, PRRX2, DAGLA, CRISPLD2, HOXA6, CCBE1, BCOR, ANGPTL2, RUNX3, CSF1R, EGR2, CRYAB, NR4A1, SNAI1, HES1, DUSP1, IRF6, CSRNP1, LCK, SGCD, FOXC2, ASB2, WNT7A, SPTB
GO:0043534~blood vessel endothelial cell migration	0.0293104	PDGFB, FOXC2, NR4A1
GO:0001938~positive regulation of endothelial cell proliferation	0.0293104	PDGFB, PGF, NR4A1
GO:1904238~pericyte cell differentiation	0.0305571	PDGFB, FOXC2
GO:0060538~skeletal muscle organ development	0.0316854	EGR2, USP2, NR4A1, ASB2
GO:0045893~positive regulation of transcription, DNA-templated	0.0337066	HES1, EGR2, PDGFB, IRF6, CSRNP1, FOXC2, NR4A1, FOSB, WNT7A, SNAI1, RUNX3
GO:1903508~positive regulation of nucleic acid-templated transcription	0.0337066	HES1, EGR2, PDGFB, IRF6, CSRNP1, FOXC2, NR4A1, FOSB, WNT7A, SNAI1, RUNX3
GO:0032501~multicellular organismal process	0.0337402	XDH, PDGFB, USP2, TACR2, PGF, PLXNA2, FAM20A, ESM1, PRRX2, DAGLA, CRISPLD2, CD177, HOXA6, CCBE1, BCOR, ANGPTL2, RUNX3, CSF1R, EGR2, EPPK1, CRYAB, NR4A1, FOSB, SNAI1, HES1, DUSP1, IRF6, CSRNP1, LCK, SGCD, FOXC2, MUC5AC, ASB2, SCARA5, WNT7A, SPTB
GO:0048015~phosphatidylinositol-mediated signaling	0.0344556	PDGFB, LCK, MUC5AC, CSF1R
GO:0042127~regulation of cell proliferation	0.034854	XDH, HES1, PDGFB, EPPK1, IRF6, PGF, LCK, NR4A1, ESM1, WNT7A, RUNX3, CSF1R
GO:0070848~response to growth factor	0.0356266	XDH, HES1, PDGFB, CCBE1, NR4A1, WNT7A, RUNX3
GO:0048017~inositol lipid-mediated signaling	0.0358866	PDGFB, LCK, MUC5AC, CSF1R
GO:1902680~positive regulation of RNA biosynthetic process	0.0367567	HES1, EGR2, PDGFB, IRF6, CSRNP1, FOXC2, NR4A1, FOSB, WNT7A, SNAI1, RUNX3
GO:0046916~cellular transition metal ion homeostasis	0.0393051	LCK, CP, SCARA5
GO:0001505~regulation of neurotransmitter levels	0.0408756	DAGLA, TACR2, SYN2, WNT7A
GO:0001501~skeletal system development	0.0409806	CSRNP1, HOXA6, FOXC2, WNT7A, SNAI1, RUNX3
GO:0043281~regulation of cysteine-type endopeptidase activity involved in apoptotic process	0.0424375	XDH, CRYAB, LCK, NR4A1
GO:0009952~anterior/posterior pattern specification	0.0424375	HES1, PLXNA2, HOXA6, FOXC2
GO:0048667~cell morphogenesis involved in neuron differentiation	0.0428098	HES1, EGR2, PLXNA2, WNT7A, CSF1R, SPTB
GO:0051254~positive regulation of RNA metabolic process	0.0445016	HES1, EGR2, PDGFB, IRF6, CSRNP1, FOXC2, NR4A1, FOSB, WNT7A, SNAI1, RUNX3
GO:1900746~regulation of vascular endothelial growth factor signaling pathway	0.045489	XDH, CCBE1
GO:0001656~metanephros development	0.0465848	HES1, PDGFB, FOXC2
GO:0001892~embryonic placenta development	0.0475272	HES1, PDGFB, SNAI1
GO:0007507~heart development	0.0475977	HES1, PDGFB, SGCD, FOXC2, BCOR, SNAI1
GO:0032879~regulation of localization	0.0479673	EPPK1, PDGFB, PGF, TACR2, CRYAB, PLXNA2, SNAI1, HES1, KCNQ3, CCBE1, LCK, FOXC2, NALCN, WNT7A, CSF1R, HTR1E
GO:0048705~skeletal system morphogenesis	0.0484184	CSRNP1, HOXA6, FOXC2, WNT7A
GO:1902547~regulation of cellular response to vascular endothelial growth factor stimulus	0.0491864	XDH, CCBE1
GO:0044700~single organism signaling	0.0493304	XDH, PDGFB, TACR2, PGF, PLXNA2, CYTH4, ESM1, DAGLA, KCNQ3, FAM83A, CCBE1, SYN2, ANKDD1A, HCAR3, CSF1R, HTR1E, EGR2, GNB1L, CRYAB, NR4A1, SNAI1, HES1, DUSP1, IRF6, CSRNP1, GPR39, LCK, FOXC2, MUC5AC, ASB2, WNT7A, SPTB
GO:0035282~segmentation	0.049433	EGR2, PLXNA2, FOXC2

## Sheet: GO  downregulated in Delta-TAM
GO terms of downregulated genes in PC3+BAZ2A-DTAM	PValue	Genes
GO:0044259~multicellular organismal macromolecule metabolic process	4.88725e-06	AKR1C3, MMP10, FAP, COL3A1, SERPINB7, COL1A2, MMP16, COL11A1, MMP13, MMP12, MMP1, COL10A1
GO:0030198~extracellular matrix organization	5.93573e-06	CYP1B1, RXFP1, LUM, COL3A1, SNCA, MMP16, ITGA4, DCN, MMP13, MMP1, MMP12, LAMA2, MMP10, COL9A1, FGG, FAP, COL1A2, COL11A1, SPP1, COL10A1
GO:0043062~extracellular structure organization	6.1759e-06	CYP1B1, RXFP1, LUM, COL3A1, SNCA, MMP16, ITGA4, DCN, MMP13, MMP1, MMP12, LAMA2, MMP10, COL9A1, FGG, FAP, COL1A2, COL11A1, SPP1, COL10A1
GO:0030574~collagen catabolic process	1.54486e-05	MMP10, COL3A1, COL1A2, MMP16, COL11A1, MMP13, MMP12, MMP1, COL10A1
GO:0044707~single-multicellular organism process	1.88635e-05	SYT1, SYT4, GRIK2, DZIP1, NELL1, TLR1, SNCA, ENAM, PDLIM3, RORB, IL15, TLR6, MMP1, IL31RA, AGTR1, IFNE, CDKN2C, FAP, C8ORF4, PRKACB, BRINP3, PRSS3P2, NEGR1, RBM11, COL10A1, CYP1A1, MDGA2, SCN2A, STMN4, SOCS1, PTPRR, SERPING1, BOLL, SLITRK3, AKR1B10, COL1A2, RYR2, SLITRK6, COL24A1, SLITRK5, C3AR1, CYP1B1, MME, CACNB2, RIMS2, KCNJ2, ABCA4, RIMS1, HESX1, FGG, FBXW7, PEG10, CRB1, BCHE, SCN9A, OLFM3, …
GO:0044236~multicellular organism metabolic process	1.96991e-05	AKR1C3, MMP10, FAP, COL3A1, SERPINB7, COL1A2, MMP16, COL11A1, MMP13, MMP12, MMP1, COL10A1
GO:0032963~collagen metabolic process	2.07089e-05	MMP10, FAP, COL3A1, SERPINB7, COL1A2, MMP16, COL11A1, MMP13, MMP12, MMP1, COL10A1
GO:0007156~homophilic cell adhesion via plasma membrane adhesion molecules	2.09083e-05	CADM2, PCDH20, PCDH10, PCDH7, PCDH17, PCDH18, CDH12, CDH7, FAT4, CDH18, TENM3, CDH19, CDH10
GO:0044243~multicellular organism catabolic process	3.30032e-05	MMP10, COL3A1, COL1A2, MMP16, COL11A1, MMP13, MMP12, MMP1, COL10A1
GO:0098742~cell-cell adhesion via plasma-membrane adhesion molecules	4.63938e-05	PTPRD, CADM2, PCDH20, PCDH10, NLGN1, PCDH7, PCDH17, PCDH18, CDH12, CDH7, FAT4, CDH18, TENM3, CDH19, CDH10
GO:0009653~anatomical structure morphogenesis	0.000102639	SYT1, SYT4, DZIP1, ENAM, RORB, SPAG17, OSR2, FAP, SEMA3E, RSPO2, SEMA3C, CALCRL, PRKACB, SEMA3A, NRG1, COL11A1, COL10A1, TMEFF2, RXFP1, MMP16, MMP13, MMP12, EYA1, SLITRK3, GNAQ, EREG, XIRP2, COL1A2, RYR2, SLITRK6, SLITRK5, C3AR1, CPM, CYP1B1, LUM, COL3A1, DCN, RIMS2, DNAH7, RIMS1, HESX1, COL9A1, FBXW7, FGG, CRB1, GPM6A, FAT4, WIPF1, OLFM3, EGF, FGD4, SPP1, FLRT3, PTPRD, PTPRZ1, NLGN1, MYOZ2, ITGA…
GO:0051962~positive regulation of nervous system development	0.000111172	FLRT3, SYT1, PTPRD, SYT4, NLGN1, HGF, RIMS2, RIMS1, EPHA3, SLITRK3, LRRTM3, TENM3, CNTN1, SEMA3A, BRINP3, EGF, SLITRK6, NRG1, NEGR1, SLITRK5, BMP5
GO:0044700~single organism signaling	0.00012229	SYT1, KLRC2, KLRC3, SYT4, GRIK2, DZIP1, TLR1, SNCA, RORB, IL15, IGHM, TLR6, IL31RA, AGTR1, PPP1R1C, IFNE, SH2D6, ARL14, C8ORF4, PRKACB, MAGI3, SCN2A, SOCS1, PTPRR, LPAR6, COL1A2, RYR2, ASB5, SLITRK5, FBXL2, C3AR1, CYP1B1, HMP19, CACNB2, RIMS2, KCNJ2, ABCA4, RIMS1, OR2L13, SESN3, FGG, FBXW7, PEG10, CRB1, CD69, BCHE, SCN9A, EGF, IL1RAPL2, NR1H4, FGD4, OR8G3P, CACNA2D1, TLR10, GABRA1, RFX6, EPM2A, B…
GO:0048666~neuron development	0.000142097	SYT1, SYT4, LUM, RORB, RIMS2, RIMS1, CRB1, GPM6A, FAT4, SEMA3E, SEMA3C, SEMA3A, OLFM3, NRG1, NEGR1, SPP1, FLRT3, PTPRD, PTPRZ1, STMN4, NLGN1, HGF, EPHA3, LAMA2, SLITRK3, GNAQ, MAP2, TENM3, CNTN1, SPTA1, AREG, SLITRK6, SLITRK5, BMP5
GO:0048731~system development	0.000155088	SYT1, SYT4, NELL1, ENAM, PDLIM3, RORB, IL15, IL31RA, AGTR1, CDKN2C, IFNE, FAP, PRKACB, BRINP3, NEGR1, COL10A1, CYP1A1, SCN2A, STMN4, MDGA2, SLITRK3, COL1A2, RYR2, COL24A1, SLITRK6, SLITRK5, C3AR1, CYP1B1, MME, RIMS2, RIMS1, HESX1, FBXW7, PEG10, CRB1, BCHE, OLFM3, IL1RAPL2, EGF, NR1H4, SPP1, TRPC4, RFX6, EPM2A, BMX, ITGA4, HGF, SERPINI1, KCNK2, FOXP2, PCDH18, EPHA3, DPPA2, LAMA2, THSD7A, MAP2, MYO…
GO:0042391~regulation of membrane potential	0.000182744	CACNA2D1, GLRB, GRIK2, SCN2A, SNCA, NLGN1, CACNB2, DCN, DGKI, KCNJ2, RIMS2, RIMS1, KCNK2, GNAQ, PLN, SCN9A, KCNH7, RYR2
GO:0023052~signaling	0.000189859	SYT1, KLRC2, KLRC3, SYT4, GRIK2, DZIP1, TLR1, SNCA, RORB, IL15, IGHM, TLR6, IL31RA, AGTR1, PPP1R1C, IFNE, SH2D6, ARL14, C8ORF4, PRKACB, MAGI3, SCN2A, SOCS1, PTPRR, LPAR6, COL1A2, RYR2, ASB5, SLITRK5, FBXL2, C3AR1, CYP1B1, HMP19, CACNB2, RIMS2, KCNJ2, ABCA4, RIMS1, OR2L13, SESN3, FGG, FBXW7, PEG10, CRB1, CD69, BCHE, SCN9A, EGF, IL1RAPL2, NR1H4, FGD4, OR8G3P, CACNA2D1, TLR10, GABRA1, RFX6, EPM2A, B…
GO:0050808~synapse organization	0.000197988	FLRT3, PTPRD, GLRB, SLITRK3, GPM6A, LRRTM3, SNCA, SEMA3E, NLGN1, CACNB2, SLITRK6, NRG1, PCDH17, SLITRK5
GO:0007154~cell communication	0.000214506	SYT1, KLRC2, KLRC3, SYT4, GRIK2, DZIP1, TLR1, SNCA, RORB, IL15, IGHM, TLR6, IL31RA, AGTR1, PPP1R1C, IFNE, SH2D6, ARL14, C8ORF4, PRKACB, MAGI3, SCN2A, SOCS1, PTPRR, LPAR6, COL1A2, RYR2, ASB5, SLITRK5, FBXL2, C3AR1, CYP1B1, HMP19, CACNB2, RIMS2, ABCA4, RIMS1, OR2L13, SESN3, FGG, FBXW7, PEG10, CRB1, CD69, BCHE, SCN9A, EGF, IL1RAPL2, NR1H4, FGD4, OR8G3P, CACNA2D1, TLR10, GABRA1, RFX6, EPM2A, BMX, ESR…
GO:0044763~single-organism cellular process	0.000297875	SYT1, KLRC2, KLRC3, SYT4, CADM2, DZIP1, NELL1, SNCA, PDLIM3, RORB, IGHM, AGTR1, HMCN1, PPP1R1C, IFNE, FAP, CH25H, BRINP3, COL10A1, TMEFF2, MAGI3, CYP1A1, MDGA2, SCN2A, PTPRR, SERPING1, BOLL, AADAC, PRDM9, LPAR6, RYR2, FBXL2, CYP1B1, MME, CACNB2, RIMS2, KCNJ2, RIMS1, CD69, OLFM3, IL1RAPL2, NR1H4, SPP1, TRPC4, EPM2A, MGAT4C, ESRRG, HGF, MYOZ2, PCDH17, KCNK2, ACPP, SERPINI2, ATP13A4, EPHA3, RERG, LA…
GO:0051960~regulation of nervous system development	0.000387595	SYT1, SYT4, COL3A1, RIMS2, RIMS1, LRRTM3, SEMA3E, SEMA3C, PRKACB, SEMA3A, BRINP3, NRG1, EGF, NEGR1, SPP1, FLRT3, PTPRD, PTPRZ1, NLGN1, HGF, EPHA3, EYA1, SLITRK3, TENM3, CNTN1, SLITRK6, SLITRK5, BMP5
GO:0044767~single-organism developmental process	0.000413887	SYT1, SYT4, DZIP1, NELL1, SNCA, ENAM, PDLIM3, RORB, IL15, IL31RA, AGTR1, IFNE, CDKN2C, FAP, C8ORF4, PRKACB, BRINP3, NEGR1, RBM11, COL10A1, TMEFF2, CYP1A1, MDGA2, SCN2A, STMN4, PTPRR, SERPING1, BOLL, SLITRK3, COL1A2, RYR2, COL24A1, SLITRK6, SLITRK5, C3AR1, CYP1B1, MME, RIMS2, RIMS1, HESX1, FBXW7, PEG10, FGG, CRB1, BCHE, SCN9A, OLFM3, EGF, IL1RAPL2, NR1H4, FGD4, SPP1, TRPC4, RFX6, EPM2A, BMX, MYOZ2…
GO:0031175~neuron projection development	0.000443978	SYT1, SYT4, LUM, RIMS2, RIMS1, GPM6A, SEMA3E, SEMA3C, SEMA3A, NRG1, NEGR1, SPP1, FLRT3, PTPRD, PTPRZ1, STMN4, NLGN1, HGF, EPHA3, LAMA2, SLITRK3, MAP2, TENM3, CNTN1, SPTA1, AREG, SLITRK6, SLITRK5, BMP5
GO:0060078~regulation of postsynaptic membrane potential	0.000577246	GRIK2, SCN2A, SNCA, NLGN1, SCN9A, DGKI, RIMS2, RIMS1
GO:0032501~multicellular organismal process	0.000601823	SYT1, SYT4, GRIK2, DZIP1, NELL1, TLR1, SNCA, ENAM, PDLIM3, RORB, IL15, TLR6, MMP1, IL31RA, AGTR1, HMCN1, IFNE, CDKN2C, FAP, C8ORF4, PRKACB, BRINP3, PRSS3P2, NEGR1, RBM11, COL10A1, CYP1A1, MDGA2, SCN2A, STMN4, SOCS1, PTPRR, SERPING1, BOLL, SLITRK3, AKR1B10, COL1A2, RYR2, SLITRK6, COL24A1, SLITRK5, C3AR1, CYP1B1, MME, CACNB2, RIMS2, KCNJ2, ABCA4, RIMS1, OR2L13, HESX1, FGG, FBXW7, PEG10, CRB1, BCHE,…
GO:0030182~neuron differentiation	0.000636708	SYT1, SYT4, LUM, RORB, RIMS2, RIMS1, CRB1, GPM6A, FAT4, SEMA3E, RSPO2, SEMA3C, SEMA3A, BRINP3, OLFM3, NRG1, NEGR1, SPP1, FLRT3, PTPRD, PTPRZ1, STMN4, MDGA2, NLGN1, HGF, EPHA3, LAMA2, EYA1, SLITRK3, GNAQ, MAP2, TENM3, CNTN1, SPTA1, AREG, SLITRK6, SLITRK5, BMP5
GO:0010976~positive regulation of neuron projection development	0.000654087	SYT1, PTPRD, SYT4, TENM3, NLGN1, CNTN1, HGF, NRG1, RIMS2, RIMS1, NEGR1, BMP5, EPHA3
GO:0051239~regulation of multicellular organismal process	0.000713586	SYT1, SYT4, NELL1, ENAM, TLR1, RORB, IL15, TLR6, AGTR1, OSR2, FAP, SEMA3E, RSPO2, C8ORF4, SEMA3C, CALCRL, PRKACB, SEMA3A, BRINP3, NRG1, NEGR1, PTGER3, SOCS1, PTPRR, SERPING1, CLIC2, CTH, EYA1, SLITRK3, EREG, SERPINB7, SCIN, CNTN1, RYR2, SLITRK6, SLITRK5, C3AR1, CYP1B1, LUM, COL3A1, CACNB2, DCN, RIMS2, KCNJ2, RIMS1, FBXW7, FGG, LRRTM3, FAT4, EGF, NR1H4, SPP1, FLRT3, TLR10, CACNA2D1, PTPRD, PTPRZ1,…
GO:0022617~extracellular matrix disassembly	0.000820423	MMP10, FAP, MMP16, DCN, MMP13, MMP12, MMP1, SPP1
GO:0099536~synaptic signaling	0.000836251	PPFIA2, GABRG1, SYT1, PTPRD, GLRB, GABRA1, SYT4, GRIK2, SNCA, NLGN1, CACNB2, DGKI, GRIA4, RIMS2, PCDH17, RIMS1, GPR1, GRM5, LAMA2, BCHE, NPFFR2, SYTL5, SLITRK5
GO:0098916~anterograde trans-synaptic signaling	0.000836251	PPFIA2, GABRG1, SYT1, PTPRD, GLRB, GABRA1, SYT4, GRIK2, SNCA, NLGN1, CACNB2, DGKI, GRIA4, RIMS2, PCDH17, RIMS1, GPR1, GRM5, LAMA2, BCHE, NPFFR2, SYTL5, SLITRK5
GO:0007268~chemical synaptic transmission	0.000836251	PPFIA2, GABRG1, SYT1, PTPRD, GLRB, GABRA1, SYT4, GRIK2, SNCA, NLGN1, CACNB2, DGKI, GRIA4, RIMS2, PCDH17, RIMS1, GPR1, GRM5, LAMA2, BCHE, NPFFR2, SYTL5, SLITRK5
GO:0099537~trans-synaptic signaling	0.000836251	PPFIA2, GABRG1, SYT1, PTPRD, GLRB, GABRA1, SYT4, GRIK2, SNCA, NLGN1, CACNB2, DGKI, GRIA4, RIMS2, PCDH17, RIMS1, GPR1, GRM5, LAMA2, BCHE, NPFFR2, SYTL5, SLITRK5
GO:0032502~developmental process	0.000915617	SYT1, SYT4, DZIP1, NELL1, SNCA, ENAM, PDLIM3, RORB, IL15, IL31RA, AGTR1, IFNE, CDKN2C, FAP, C8ORF4, PRKACB, BRINP3, NEGR1, RBM11, COL10A1, TMEFF2, CYP1A1, MDGA2, SCN2A, STMN4, PTPRR, SERPING1, BOLL, SLITRK3, COL1A2, RYR2, SLITRK6, COL24A1, SLITRK5, C3AR1, CYP1B1, MME, RIMS2, RIMS1, HESX1, FBXW7, PEG10, FGG, CRB1, BCHE, SCN9A, OLFM3, EGF, IL1RAPL2, NR1H4, FGD4, SPP1, TRPC4, RFX6, EPM2A, BMX, MYOZ2…
GO:0048856~anatomical structure development	0.000954625	SYT1, SYT4, DZIP1, NELL1, ENAM, PDLIM3, RORB, IL15, IL31RA, AGTR1, IFNE, CDKN2C, FAP, C8ORF4, PRKACB, BRINP3, NEGR1, RBM11, COL10A1, TMEFF2, CYP1A1, MDGA2, SCN2A, STMN4, PTPRR, BOLL, SLITRK3, COL1A2, RYR2, SLITRK6, COL24A1, SLITRK5, C3AR1, CYP1B1, MME, RIMS2, RIMS1, HESX1, FBXW7, PEG10, FGG, CRB1, BCHE, SCN9A, OLFM3, EGF, IL1RAPL2, NR1H4, FGD4, SPP1, TRPC4, RFX6, EPM2A, BMX, MYOZ2, ITGA4, HGF, SE…
GO:0007275~multicellular organism development	0.000967165	SYT1, SYT4, DZIP1, NELL1, ENAM, PDLIM3, RORB, IL15, IL31RA, AGTR1, IFNE, CDKN2C, FAP, C8ORF4, PRKACB, BRINP3, NEGR1, RBM11, COL10A1, CYP1A1, SCN2A, STMN4, MDGA2, PTPRR, BOLL, SLITRK3, COL1A2, RYR2, COL24A1, SLITRK6, SLITRK5, C3AR1, CYP1B1, MME, RIMS2, RIMS1, HESX1, FBXW7, PEG10, CRB1, BCHE, SCN9A, OLFM3, IL1RAPL2, EGF, NR1H4, SPP1, TRPC4, RFX6, EPM2A, BMX, ITGA4, HGF, SERPINI1, KCNK2, PCDH18, FOX…
GO:0072376~protein activation cascade	0.000991639	CFHR1, C3AR1, FGG, CR2, MASP1, CFH, IGHA1, IGHA2, SERPING1, IGHM
GO:0007601~visual perception	0.0010912	GLRB, CYP1B1, HMCN1, PPEF2, LUM, POU6F2, CACNB2, RORB, ABCA4, SLITRK6, COL11A1, RIMS1
GO:0022008~neurogenesis	0.00111053	SYT1, SYT4, LUM, COL3A1, RORB, RIMS2, RIMS1, CRB1, GPM6A, BCHE, CDKN2C, FAT4, SEMA3E, RSPO2, SEMA3C, SEMA3A, BRINP3, OLFM3, NRG1, NEGR1, SPP1, FLRT3, TRPC4, PTPRD, PTPRZ1, STMN4, MDGA2, NLGN1, HGF, EPHA3, LAMA2, EYA1, SLITRK3, GNAQ, MAP2, TENM3, CNTN1, AREG, SPTA1, SLITRK6, SLITRK5, BMP5
GO:0048699~generation of neurons	0.00114143	SYT1, SYT4, LUM, COL3A1, RORB, RIMS2, RIMS1, CRB1, GPM6A, BCHE, FAT4, SEMA3E, RSPO2, SEMA3C, SEMA3A, BRINP3, OLFM3, NRG1, NEGR1, SPP1, FLRT3, PTPRD, PTPRZ1, STMN4, MDGA2, NLGN1, HGF, EPHA3, LAMA2, EYA1, SLITRK3, GNAQ, MAP2, TENM3, CNTN1, SPTA1, AREG, SLITRK6, SLITRK5, BMP5
GO:0051094~positive regulation of developmental process	0.00118386	SYT1, C3AR1, CYP1B1, SYT4, NELL1, ENAM, IL15, DCN, RIMS2, RIMS1, FGG, OSR2, LRRTM3, SEMA3A, BRINP3, NRG1, EGF, NEGR1, NR1H4, FLRT3, PTPRD, NLGN1, HGF, EPHA3, FOXP2, CTH, SLITRK3, SCIN, TENM3, SERPINB7, CNTN1, SLITRK6, SLITRK5, BMP5
GO:0050953~sensory perception of light stimulus	0.00122271	GLRB, CYP1B1, HMCN1, PPEF2, LUM, POU6F2, CACNB2, RORB, ABCA4, SLITRK6, COL11A1, RIMS1
GO:0007399~nervous system development	0.00124473	SYT1, SYT4, NELL1, POU6F2, RORB, TTLL7, CDKN2C, RSPO2, SEMA3E, SEMA3C, PRKACB, SEMA3A, BRINP3, NRG1, NEGR1, STMN4, SCN2A, MDGA2, EYA1, SLITRK3, GNAQ, CNTN1, SLITRK6, SLITRK5, LUM, COL3A1, RIMS2, RIMS1, HESX1, CRB1, GPM6A, LRRTM3, FAT4, BCHE, OLFM3, IL1RAPL2, EGF, SPP1, FLRT3, TRPC4, GLRB, PTPRD, PTPRZ1, EPM2A, NLGN1, HGF, SERPINI1, FOXP2, PCDH18, EPHA3, LAMA2, TENM3, MAP2, MYO16, SPTA1, AREG, BMP5
GO:0048812~neuron projection morphogenesis	0.00125257	FLRT3, SYT1, PTPRD, SYT4, PTPRZ1, LUM, NLGN1, RIMS2, RIMS1, LAMA2, SLITRK3, GPM6A, MAP2, SEMA3E, SEMA3C, SEMA3A, SPTA1, NRG1, SLITRK6, SLITRK5, SPP1
GO:0044699~single-organism process	0.00140049	SYT1, KLRC2, KLRC3, SYT4, CADM2, DZIP1, NELL1, SNCA, PDLIM3, RORB, IGHM, AGTR1, HMCN1, PPP1R1C, IFNE, FAP, CH25H, BRINP3, COL10A1, TMEFF2, MAGI3, CYP1A1, MDGA2, SCN2A, PTPRR, SERPING1, BOLL, AADAC, PRDM9, LPAR6, RYR2, FBXL2, CYP1B1, MME, CACNB2, RIMS2, KCNJ2, RIMS1, HESX1, CD69, OLFM3, IL1RAPL2, NR1H4, SPP1, TRPC4, MGAT4C, EPM2A, ESRRG, HGF, MYOZ2, SERPINI1, PCDH17, KCNK2, OTOGL, ACPP, SERPINI2, …
GO:0040013~negative regulation of locomotion	0.00182239	TMEFF2, CYP1B1, SPOCK3, SEMA3E, COL3A1, PTPRR, SEMA3C, DACH1, DCN, SEMA3A, NRG1, ARID2, BMP5
GO:0050794~regulation of cellular process	0.00186684	SYT1, KLRC2, KLRC3, SYT4, MASP1, DZIP1, NELL1, SNCA, RORB, IGHM, AGTR1, PPP1R1C, IFNE, FAP, BRINP3, TMEFF2, MAGI3, CYP1A1, SCN2A, PTPRR, SERPING1, BOLL, ZNF788, AADAC, PRDM9, LPAR6, RYR2, WFDC5, FBXL2, CYP1B1, CACNB2, RIMS2, KCNJ2, ZNF618, RIMS1, HESX1, CD69, IL1RAPL2, NR1H4, SPP1, ASXL3, IKZF2, EPM2A, ESRRG, HGF, SERPINI1, PCDH17, KCNK2, ACPP, SERPINI2, EPHA3, RERG, LAMA2, NR1I2, EPHA6, CSRNP3, …
GO:0051271~negative regulation of cellular component movement	0.00188158	TMEFF2, CYP1B1, SPOCK3, SEMA3E, COL3A1, PTPRR, SEMA3C, DACH1, DCN, SEMA3A, NRG1, ARID2, BMP5
GO:0007416~synapse assembly	0.00189597	FLRT3, PTPRD, SLITRK3, GPM6A, LRRTM3, NLGN1, NRG1, SLITRK6, SLITRK5
GO:0072359~circulatory system development	0.00194225	C3AR1, CYP1B1, COL3A1, PDLIM3, DCN, FBXW7, FAT4, FAP, SEMA3E, SEMA3C, CALCRL, EGF, NRG1, COL11A1, FLRT3, HGF, KCNK2, THSD7A, EYA1, CTH, EREG, GNAQ, XIRP2, PLN, SERPINB7, COL1A2, RYR2, SLITRK5, HPGD, BMP5
GO:0072358~cardiovascular system development	0.00194225	C3AR1, CYP1B1, COL3A1, PDLIM3, DCN, FBXW7, FAT4, FAP, SEMA3E, SEMA3C, CALCRL, EGF, NRG1, COL11A1, FLRT3, HGF, KCNK2, THSD7A, EYA1, CTH, EREG, GNAQ, XIRP2, PLN, SERPINB7, COL1A2, RYR2, SLITRK5, HPGD, BMP5
GO:0048513~animal organ development	0.00212307	SYT1, NRG4, SYT4, NELL1, ENAM, PDLIM3, RORB, IL15, IL31RA, AKR1C3, AGTR1, OSR2, IFNE, SEMA3E, RSPO2, SEMA3C, CALCRL, SEMA3A, NRG1, COL11A1, COL10A1, CYP1A1, RXFP1, MDGA2, MMP16, MMP13, EYA1, GNAQ, EREG, XIRP2, SERPINB7, SCIN, COL1A2, CNTN1, RYR2, SLITRK6, COL24A1, SLITRK5, CYP1B1, LUM, COL3A1, MME, DCN, HESX1, COL9A1, PEG10, FBXW7, CRB1, GPM6A, FAT4, OLFM3, EGF, NR1H4, SPP1, FLRT3, PTPRC, CR2, PT…
GO:0060079~excitatory postsynaptic potential	0.00216346	GRIK2, SNCA, NLGN1, DGKI, RIMS2, RIMS1
GO:0010975~regulation of neuron projection development	0.00229807	SYT1, PTPRD, SYT4, NLGN1, HGF, RIMS2, RIMS1, EPHA3, TENM3, SEMA3E, CNTN1, SEMA3C, SEMA3A, NRG1, NEGR1, BMP5, SPP1
GO:0031346~positive regulation of cell projection organization	0.00249828	SYT1, PTPRD, SYT4, NLGN1, HGF, RIMS2, RIMS1, EPHA3, GPM6A, TENM3, CNTN1, NRG1, NEGR1, BMP5
GO:0010951~negative regulation of endopeptidase activity	0.00266283	WFIKKN2, SPINK13, CARD16, SPOCK3, SNCA, SERPINB7, SERPINB10, SERPING1, HGF, SERPINI1, WFDC5, SERPINI2
GO:0007269~neurotransmitter secretion	0.00287847	PPFIA2, SYT1, SYT4, SNCA, NLGN1, SYTL5, DGKI, RIMS2, RIMS1
GO:0099643~signal release from synapse	0.00287847	PPFIA2, SYT1, SYT4, SNCA, NLGN1, SYTL5, DGKI, RIMS2, RIMS1
GO:0045666~positive regulation of neuron differentiation	0.00293948	SYT1, PTPRD, SYT4, NLGN1, HGF, RIMS2, RIMS1, EPHA3, TENM3, CNTN1, BRINP3, NRG1, NEGR1, BMP5
GO:0051240~positive regulation of multicellular organismal process	0.00296135	C3AR1, SYT1, CYP1B1, SYT4, LUM, NELL1, TLR1, ENAM, IL15, RIMS2, TLR6, RIMS1, FGG, OSR2, LRRTM3, SEMA3A, BRINP3, EGF, NRG1, NEGR1, NR1H4, SPP1, FLRT3, PTPRD, PTGER3, NLGN1, HGF, EPHA3, FOXP2, CTH, SLITRK3, EREG, SCIN, TENM3, SERPINB7, CNTN1, RYR2, SLITRK6, SLITRK5, BMP5
GO:0048858~cell projection morphogenesis	0.00298985	SYT1, SYT4, LUM, DZIP1, DNAH7, RIMS2, RIMS1, SPAG17, GPM6A, SEMA3E, SEMA3C, SEMA3A, NRG1, SPP1, FLRT3, PTPRD, PTPRZ1, NLGN1, LAMA2, SLITRK3, TRIM59, MAP2, SPTA1, SLITRK6, SLITRK5, IQUB
GO:0060560~developmental growth involved in morphogenesis	0.00305403	FLRT3, SYT1, SYT4, SEMA3E, SEMA3C, SEMA3A, AREG, NRG1, RIMS2, RIMS1, SPP1
GO:0018108~peptidyl-tyrosine phosphorylation	0.00310353	NRG4, FBXW7, STYK1, EPHA6, EREG, SOCS1, BMX, CNTN1, HGF, IL15, NRG1, EGF, SAMSN1, IL31RA, EPHA3
GO:2000026~regulation of multicellular organismal development	0.00310472	C3AR1, SYT1, CYP1B1, SYT4, NELL1, ENAM, COL3A1, IL15, DCN, RIMS2, RIMS1, FBXW7, OSR2, LRRTM3, FAT4, SEMA3E, RSPO2, C8ORF4, SEMA3C, PRKACB, SEMA3A, BRINP3, EGF, NRG1, NEGR1, NR1H4, SPP1, FLRT3, PTPRD, PTPRZ1, NLGN1, HGF, KCNK2, EPHA3, FOXP2, LAMA2, EYA1, CTH, SLITRK3, SCIN, TENM3, SERPINB7, CNTN1, SLITRK6, SLITRK5, BMP5
GO:1990138~neuron projection extension	0.00314278	FLRT3, SYT1, SYT4, SEMA3E, SEMA3C, SEMA3A, NRG1, RIMS2, RIMS1
GO:0003008~system process	0.00314398	GRIK2, MYBPC1, POU6F2, RORB, IL15, AKR1C3, AGTR1, HMCN1, PRKACB, SEMA3A, CALCRL, NRG1, COL11A1, PTGER3, CNTN5, SCN2A, CLIC2, SERPING1, GRM5, EYA1, PPEF2, COL1A2, RYR2, SLITRK6, C3AR1, CYP1B1, LUM, MME, CACNB2, ABCA4, KCNJ2, RIMS1, OR2L13, FGG, BCHE, SCN9A, IGHA1, IGHA2, CACNA2D1, GLRB, OR8G3P, PTPRZ1, EPM2A, NLGN1, DGKI, HGF, KCNK2, OTOGL, ACPP, FOXP2, NTS, PLN
GO:0018212~peptidyl-tyrosine modification	0.00326835	NRG4, FBXW7, STYK1, EPHA6, EREG, SOCS1, BMX, CNTN1, HGF, IL15, NRG1, EGF, SAMSN1, IL31RA, EPHA3
GO:1903861~positive regulation of dendrite extension	0.00343226	SYT1, SYT4, RIMS2, RIMS1
GO:1903859~regulation of dendrite extension	0.00343226	SYT1, SYT4, RIMS2, RIMS1
GO:0045861~negative regulation of proteolysis	0.00357681	WFIKKN2, SPINK13, MASP1, SPOCK3, NELL1, SNCA, SERPING1, HGF, SERPINI1, SERPINI2, CARD16, SERPINB7, SERPINB10, WFDC5
GO:1903510~mucopolysaccharide metabolic process	0.00364211	NDST4, SPOCK3, LUM, IL15, DCN, HGF, HYAL4, EGF
GO:0007165~signal transduction	0.00367656	KLRC2, KLRC3, GRIK2, DZIP1, SNCA, TLR1, RORB, IL15, IGHM, TLR6, IL31RA, AGTR1, PPP1R1C, IFNE, SH2D6, ARL14, C8ORF4, PRKACB, MAGI3, SOCS1, PTPRR, LPAR6, COL1A2, RYR2, ASB5, FBXL2, C3AR1, CYP1B1, HMP19, RIMS2, ABCA4, RIMS1, OR2L13, SESN3, FGG, FBXW7, PEG10, CD69, EGF, IL1RAPL2, NR1H4, FGD4, TLR10, OR8G3P, GABRA1, EPM2A, ESRRG, BMX, ITGA4, HGF, KCNK2, ACPP, EPHA3, TRIM55, RERG, NR1I2, UACA, EPHA6, T…
GO:0099531~presynaptic process involved in chemical synaptic transmission	0.00372777	PPFIA2, SYT1, SYT4, SNCA, NLGN1, SYTL5, DGKI, RIMS2, RIMS1
GO:0010466~negative regulation of peptidase activity	0.00385045	WFIKKN2, SPINK13, CARD16, SPOCK3, SNCA, SERPINB7, SERPINB10, SERPING1, HGF, SERPINI1, WFDC5, SERPINI2
GO:0007610~behavior	0.00387124	GLRB, PTPRZ1, GRIK2, EPM2A, SNCA, NLGN1, DGKI, DACH1, PCDH17, KCNK2, FOXP2, GRM5, GNAQ, BCHE, SCN9A, MSS51, NRG1, SLITRK6, SLITRK5, NEGR1
GO:0009887~organ morphogenesis	0.00393025	ENAM, COL3A1, RORB, DCN, HESX1, COL9A1, FBXW7, OSR2, CRB1, FAT4, RSPO2, SEMA3C, SEMA3A, OLFM3, NRG1, COL11A1, COL10A1, MMP16, HGF, MMP13, FOXP2, EYA1, EREG, XIRP2, TENM3, COL1A2, RYR2, AREG, SLITRK6, BMP5
GO:0032990~cell part morphogenesis	0.00411505	SYT1, SYT4, LUM, DZIP1, DNAH7, RIMS2, RIMS1, SPAG17, GPM6A, SEMA3E, SEMA3C, SEMA3A, NRG1, SPP1, FLRT3, PTPRD, PTPRZ1, NLGN1, LAMA2, SLITRK3, TRIM59, MAP2, SPTA1, SLITRK6, SLITRK5, IQUB
GO:0006956~complement activation	0.00420301	CFHR1, CR2, MASP1, CFH, IGHA1, IGHA2, SERPING1, IGHM
GO:0007167~enzyme linked receptor protein signaling pathway	0.00428968	WFIKKN2, NRG4, COL3A1, SNCA, DCN, IL31RA, FBXW7, PEG10, SH2D6, FAT4, NRG1, EGF, NR1H4, FLRT3, PTPRD, SOCS1, BMX, PTPRR, HGF, EPHA3, AFP, STYK1, EPHA6, EREG, COL1A2, RYR2, AREG, HPGD, BMP5
GO:0048791~calcium ion-regulated exocytosis of neurotransmitter	0.00445474	SYT1, SYT4, SYTL5, RIMS2, RIMS1
GO:0038128~ERBB2 signaling pathway	0.00445474	NRG4, EREG, PTPRR, EGF, NRG1
GO:0009888~tissue development	0.00451346	CYP1B1, LUM, NELL1, ENAM, COL3A1, DCN, IL31RA, HESX1, AKR1C3, OSR2, FAT4, SEMA3E, RSPO2, SEMA3C, PRKACB, SEMA3A, EGF, NRG1, COL11A1, NR1H4, SPP1, COL10A1, FLRT3, TMEFF2, PTPRC, CYP1A1, RXFP1, RFX6, BMX, ITGA4, HGF, KCNK2, MMP13, MMP12, DPPA2, FOXP2, EYA1, EREG, XIRP2, PLN, SCIN, SERPINB7, RYR2, AREG, SLITRK6, BMP5
GO:0051965~positive regulation of synapse assembly	0.00460897	FLRT3, SLITRK3, LRRTM3, NLGN1, SLITRK6, SLITRK5
GO:0030199~collagen fibril organization	0.00488357	CYP1B1, LUM, COL3A1, COL1A2, COL11A1
GO:0007166~cell surface receptor signaling pathway	0.005146	NRG4, GRIK2, DZIP1, SNCA, IGHM, IL31RA, SH2D6, IFNE, SEMA3E, RSPO2, C8ORF4, SEMA3C, CALCRL, PRKACB, SEMA3A, NRG1, SOCS1, PTPRR, GRM5, STYK1, EYA1, EREG, GNAQ, COL1A2, CNTN1, RYR2, WFIKKN2, C3AR1, COL3A1, DCN, RIMS2, RIMS1, PEG10, FBXW7, FGG, LRRTM3, FAT4, IGHA1, IGHA2, WIPF1, IL1RAPL2, EGF, NR1H4, FLRT3, PTPRC, PTPRD, CR2, NLGN1, BMX, GRIA4, DGKI, ITGA4, HGF, ACPP, EPHA3, TSPAN19, RNF43, AFP, EPH…
GO:0050919~negative chemotaxis	0.00533926	FLRT3, SEMA3E, SEMA3C, SEMA3A, NRG1
GO:0097484~dendrite extension	0.00538463	SYT1, SYT4, RIMS2, RIMS1
GO:0048588~developmental cell growth	0.00547525	FLRT3, SYT1, SYT4, SEMA3E, SEMA3C, SEMA3A, NRG1, RIMS2, RIMS1, SPP1
GO:0099565~chemical synaptic transmission, postsynaptic	0.0056206	GRIK2, SNCA, NLGN1, DGKI, RIMS2, RIMS1
GO:0030030~cell projection organization	0.00593997	SYT1, SYT4, LUM, DZIP1, RIMS2, DNAH7, RIMS1, SPAG17, GPM6A, FAT4, SEMA3E, SEMA3C, SEMA3A, NRG1, NEGR1, SPP1, FGD4, FLRT3, PTPRD, PTPRZ1, STMN4, NLGN1, HGF, EPHA3, LAMA2, SLITRK3, TRIM59, MAP2, TENM3, CNTN1, SPTA1, AREG, SLITRK6, SLITRK5, BMP5, IQUB
GO:0050789~regulation of biological process	0.00612235	SYT1, KLRC2, KLRC3, SYT4, MASP1, DZIP1, NELL1, SNCA, RORB, IGHM, AGTR1, PPP1R1C, IFNE, FAP, CFH, BRINP3, TMEFF2, MAGI3, CYP1A1, SCN2A, PTPRR, SERPING1, BOLL, ZNF788, AADAC, PRDM9, LPAR6, RYR2, WFDC5, FBXL2, CYP1B1, MME, CACNB2, RIMS2, KCNJ2, ZNF618, RIMS1, HESX1, CD69, IL1RAPL2, NR1H4, SPP1, ASXL3, IKZF2, EPM2A, ESRRG, HGF, SERPINI1, PCDH17, KCNK2, ACPP, SERPINI2, EPHA3, RERG, LAMA2, NR1I2, EPHA6…
GO:2000146~negative regulation of cell motility	0.00621791	TMEFF2, CYP1B1, SPOCK3, COL3A1, PTPRR, DACH1, DCN, SEMA3A, NRG1, ARID2, BMP5
GO:0051270~regulation of cellular component movement	0.00642649	C3AR1, PTPRC, TMEFF2, NRG4, CYP1B1, SPOCK3, COL3A1, PTPRR, DACH1, ITGA4, DCN, HGF, KCNJ2, ARID2, LAMA2, MMP10, EREG, PLN, SEMA3E, RYR2, SEMA3C, SEMA3A, EGF, NRG1, BMP5
GO:0001505~regulation of neurotransmitter levels	0.00736044	PPFIA2, SYT1, NAALAD2, SYT4, SNCA, NLGN1, SYTL5, DGKI, RIMS2, RIMS1
GO:0006836~neurotransmitter transport	0.00736044	PPFIA2, SYT1, SYT4, SNCA, NLGN1, SLC6A15, SYTL5, DGKI, RIMS2, RIMS1
GO:0051130~positive regulation of cellular component organization	0.0075413	SYT1, SYT4, MYBPC1, SNCA, DCN, RIMS2, TLR6, RIMS1, MMP1, FGG, FBXW7, GPM6A, LRRTM3, WIPF1, NRG1, EGF, NEGR1, FLRT3, PTPRD, NLGN1, SYNPO2, HGF, EPHA3, SLITRK3, PRDM9, EREG, SCIN, TENM3, CNTN1, SLITRK6, SLITRK5, SLC17A9, BMP5
GO:0050769~positive regulation of neurogenesis	0.0076182	SYT1, PTPRD, SYT4, NLGN1, HGF, RIMS2, RIMS1, EPHA3, TENM3, CNTN1, SEMA3A, BRINP3, NRG1, NEGR1, BMP5
GO:0045410~positive regulation of interleukin-6 biosynthetic process	0.00776983	EREG, TLR1, TLR6
GO:0048518~positive regulation of biological process	0.00777557	LGALS17A, SYT1, MASP1, SYT4, GRIK2, NELL1, SNCA, TLR1, ENAM, RORB, IL15, IGHM, TLR6, MMP1, IL31RA, AGTR1, PPP1R1C, IFNE, FAP, C8ORF4, CFH, RBMS3, PRKACB, BRINP3, NEGR1, CYP1A1, SOCS1, SERPING1, BOLL, AADAC, SLITRK3, PRDM9, LPAR6, RYR2, SLITRK6, SLITRK5, C3AR1, CYP1B1, CACNB2, RIMS2, KCNJ2, RIMS1, FBXW7, FGG, EGF, NR1H4, FGD4, SPP1, TLR10, CACNA2D1, IKZF2, RFX6, EPM2A, ESRRG, ITGA4, HGF, KCNK2, AC…
GO:0001508~action potential	0.00803975	CACNA2D1, GNAQ, GRIK2, SCN2A, SCN9A, CACNB2, RYR2, KCNJ2
GO:0061448~connective tissue development	0.00809213	OSR2, RXFP1, LUM, RSPO2, SCIN, SERPINB7, COL11A1, MMP13, NR1H4, BMP5, COL10A1
GO:0048522~positive regulation of cellular process	0.00812562	LGALS17A, SYT1, SYT4, GRIK2, NELL1, SNCA, TLR1, RORB, IL15, TLR6, IGHM, MMP1, IL31RA, AGTR1, PPP1R1C, IFNE, FAP, C8ORF4, RBMS3, PRKACB, BRINP3, NEGR1, CYP1A1, SOCS1, BOLL, AADAC, SLITRK3, PRDM9, LPAR6, RYR2, SLITRK6, SLITRK5, C3AR1, CYP1B1, CACNB2, KCNJ2, RIMS2, RIMS1, FBXW7, FGG, EGF, NR1H4, FGD4, CACNA2D1, IKZF2, RFX6, EPM2A, ESRRG, ITGA4, HGF, KCNK2, ACPP, EPHA3, FOXP2, DPPA2, LAMA2, NR1I2, CS…
GO:0071229~cellular response to acid chemical	0.00829338	AKR1C3, COL3A1, SOCS1, COL1A2, RORB, BRINP3, NR1H4, EPHA3, SESN3
GO:0099003~vesicle mediated transport in synapse	0.00851219	SYT1, SYT4, SNCA, NLGN1, SYTL5, RIMS2, RIMS1
GO:0001933~negative regulation of protein phosphorylation	0.00858947	FLRT3, PTPRC, NELL1, SNCA, SOCS1, PTPRR, DCN, HGF, SAMSN1, PPP1R1C, GNAQ, PPEF2, LRRTM3, CDKN2C, FABP4
GO:0086010~membrane depolarization during action potential	0.00867665	CACNA2D1, SCN2A, SCN9A, CACNB2, KCNJ2
GO:0051716~cellular response to stimulus	0.00869738	SYT1, KLRC2, KLRC3, GRIK2, DZIP1, TLR1, SNCA, RORB, IL15, IGHM, TLR6, IL31RA, AGTR1, PPP1R1C, IFNE, SH2D6, CH25H, ARL14, C8ORF4, PRKACB, BRINP3, RBM11, MAGI3, CYP1A1, SOCS1, PTPRR, AADAC, LPAR6, COL1A2, RYR2, ASB5, FBXL2, C3AR1, ARPP21, CYP1B1, HMP19, MME, RIMS2, KCNJ2, ABCA4, RIMS1, OR2L13, SESN3, FGG, FBXW7, PEG10, CD69, TFEC, EGF, IL1RAPL2, NR1H4, SPP1, FGD4, OR8G3P, TLR10, GABRA1, RFX6, EPM2A…
GO:0045664~regulation of neuron differentiation	0.00874541	SYT1, PTPRD, SYT4, NLGN1, HGF, RIMS2, RIMS1, EPHA3, EYA1, TENM3, SEMA3E, CNTN1, SEMA3C, SEMA3A, BRINP3, NRG1, NEGR1, BMP5, SPP1
GO:0000902~cell morphogenesis	0.00881115	SYT1, SYT4, LUM, DZIP1, RIMS2, DNAH7, RIMS1, SPAG17, FGG, GPM6A, SEMA3E, SEMA3C, WIPF1, SEMA3A, NRG1, SPP1, FGD4, FLRT3, PTPRD, PTPRZ1, NLGN1, HGF, ITGA4, EPHA3, LAMA2, SLITRK3, TRIM59, MAP2, TENM3, SPTA1, SLITRK6, SLITRK5, BMP5, IQUB
GO:0009605~response to external stimulus	0.0088262	MASP1, SNCA, TLR1, IL15, IGHM, TLR6, IL31RA, AKR1C3, AGTR1, IFNE, CH25H, FAP, SEMA3E, CFH, SEMA3C, SEMA3A, CALCRL, NRG1, COL11A1, PIK3C2G, PTGER3, CYP1A1, SERPING1, GNAQ, RYR2, SLITRK6, VIP, C3AR1, COL3A1, DCN, ABCA4, KCNJ2, ALDH3A1, FGG, BCHE, IGHA1, IGHA2, WIPF1, NR1H4, SPP1, FLRT3, PTPRC, GLRB, TLR10, HGF, KCNK2, FOXP2, LAMA2, PLSCR4, FABP4, SPTA1
GO:0007169~transmembrane receptor protein tyrosine kinase signaling pathway	0.00901488	FLRT3, NRG4, SOCS1, SNCA, BMX, PTPRR, HGF, DCN, IL31RA, EPHA3, STYK1, FBXW7, EPHA6, EREG, FAT4, SH2D6, AREG, NRG1, EGF, NR1H4, BMP5
GO:0051650~establishment of vesicle localization	0.00956941	DYNC1I1, SYT1, SYT4, SNCA, NLGN1, SYTL5, LRMP, ITGA4, AREG, RIMS2, RIMS1
GO:0017158~regulation of calcium ion-dependent exocytosis	0.0095806	SYT1, SYT4, NLGN1, SYTL5, RIMS2, RIMS1
GO:0007259~JAK-STAT cascade	0.00982666	FLRT3, CYP1B1, LRRTM3, IFNE, SOCS1, IL15, DCN, EGF, IL31RA
GO:0046834~lipid phosphorylation	0.0101895	NRG4, DGKB, PIK3C2G, EREG, DGKI, EGF, NRG1
GO:0051346~negative regulation of hydrolase activity	0.0102274	WFIKKN2, SPINK13, CSRNP3, CARD16, SPOCK3, PLN, SNCA, SERPINB7, SERPINB10, SERPING1, DGKI, HGF, SERPINI1, WFDC5, SERPINI2
GO:0006928~movement of cell or subcellular component	0.0107313	C3AR1, NRG4, CYP1B1, SPOCK3, MYBPC1, COL3A1, CACNB2, DCN, DNAH7, KCNJ2, ARID2, MMP1, SPAG17, AGTR1, GPM6A, CH25H, FAP, SEMA3E, SEMA3C, WIPF1, SEMA3A, EGF, NRG1, PRSS3P2, FLRT3, DYNC1I1, TMEFF2, PTPRC, CACNA2D1, PTPRR, DACH1, ITGA4, HGF, MMP12, SERPINI2, EPHA3, LAMA2, MMP10, STYK1, EREG, PLN, COL1A2, RYR2, SPTA1, BMP5
GO:0007157~heterophilic cell-cell adhesion via plasma membrane cell adhesion molecules	0.0107623	PTPRD, FAT4, CADM2, TENM3, NLGN1
GO:0006887~exocytosis	0.0108224	SYT1, FGG, SYT4, SCIN, SNCA, NLGN1, SYTL5, SERPING1, PCDH7, HGF, RIMS2, EGF, RIMS1, SLC17A9, STXBP5L
GO:0043086~negative regulation of catalytic activity	0.0108541	FLRT3, WFIKKN2, PTPRC, SPINK13, SPOCK3, NELL1, SNCA, SOCS1, SERPING1, DGKI, DCN, HGF, SERPINI1, SERPINI2, GNAQ, CARD16, CSRNP3, PPP1R1C, LRRTM3, CDKN2C, PLN, SERPINB7, SERPINB10, FABP4, WFDC5
GO:0006959~humoral immune response	0.0112558	CFHR1, VIP, C3AR1, CR2, MASP1, IFNE, CFH, IGHA1, IGHA2, SERPING1, IGHM
GO:0017157~regulation of exocytosis	0.0115597	SYT1, FGG, SYT4, SNCA, NLGN1, SYTL5, RIMS2, RIMS1, STXBP5L
GO:0097696~STAT cascade	0.0115597	FLRT3, CYP1B1, LRRTM3, IFNE, SOCS1, IL15, DCN, EGF, IL31RA
GO:0050806~positive regulation of synaptic transmission	0.0115927	LAMA2, SYT1, GRIK2, SNCA, NLGN1, RIMS2, RIMS1
GO:0045055~regulated exocytosis	0.0117431	SYT1, FGG, SYT4, SCIN, NLGN1, SYTL5, SERPING1, PCDH7, HGF, EGF, RIMS2, RIMS1
GO:0048729~tissue morphogenesis	0.0119503	FLRT3, TMEFF2, COL3A1, HGF, MMP12, HESX1, EYA1, FAT4, XIRP2, RSPO2, SEMA3E, SEMA3C, RYR2, SEMA3A, AREG, PRKACB, NRG1, EGF, COL11A1, BMP5
GO:0061138~morphogenesis of a branching epithelium	0.0119609	EYA1, FAT4, SEMA3E, RSPO2, SEMA3C, SEMA3A, AREG, HGF, EGF
GO:0060600~dichotomous subdivision of an epithelial terminal unit	0.0122059	SEMA3C, SEMA3A, AREG
GO:0030336~negative regulation of cell migration	0.012266	TMEFF2, CYP1B1, COL3A1, PTPRR, DACH1, DCN, SEMA3A, NRG1, ARID2, BMP5
GO:0051966~regulation of synaptic transmission, glutamatergic	0.012318	GRM5, SYT1, GRIK2, NLGN1, DGKI
GO:0032989~cellular component morphogenesis	0.0123542	SYT1, SYT4, LUM, DZIP1, RIMS2, DNAH7, RIMS1, SPAG17, FGG, GPM6A, SEMA3E, SEMA3C, WIPF1, SEMA3A, NRG1, SPP1, FGD4, FLRT3, PTPRD, PTPRZ1, NLGN1, MYOZ2, HGF, ITGA4, EPHA3, LAMA2, SLITRK3, TRIM59, MAP2, TENM3, SPTA1, SLITRK6, SLITRK5, BMP5, IQUB
GO:0051963~regulation of synapse assembly	0.012453	FLRT3, SLITRK3, LRRTM3, NLGN1, SLITRK6, SLITRK5
GO:0032879~regulation of localization	0.0127233	SYT1, NRG4, SYT4, MYBPC1, SNCA, TLR1, TLR6, STXBP5L, AGTR1, SEMA3E, C8ORF4, SEMA3C, SEMA3A, NRG1, TMEFF2, PTGER3, SCN2A, SOCS1, PTPRR, CLIC2, MMP10, EREG, GNAQ, SCIN, CNTN1, KCNH7, RYR2, VIP, C3AR1, CYP1B1, SPOCK3, COL3A1, CACNB2, DCN, RIMS2, KCNJ2, RIMS1, ARID2, FBXW7, FGG, SCN9A, EGF, NR1H4, PTPRC, CACNA2D1, TLR10, RFX6, NLGN1, DACH1, ITGA4, HGF, PCDH17, LAMA2, TEX15, PLN, SYTL5, BMP5, SLC17A9
GO:0050730~regulation of peptidyl-tyrosine phosphorylation	0.0129109	FBXW7, EREG, SOCS1, CNTN1, IL15, HGF, EGF, NRG1, SAMSN1, IL31RA
GO:0051648~vesicle localization	0.0131076	DYNC1I1, SYT1, SYT4, SNCA, NLGN1, SYTL5, LRMP, ITGA4, AREG, RIMS2, RIMS1
GO:0017156~calcium ion regulated exocytosis	0.0131271	SYT1, SYT4, SCIN, NLGN1, SYTL5, RIMS2, RIMS1
GO:0050896~response to stimulus	0.0134762	KLRC4, SYT1, KLRC2, KLRC3, MASP1, GRIK2, DZIP1, TLR1, SNCA, RORB, IL15, IGHM, TLR6, IL31RA, AGTR1, HMCN1, PPP1R1C, IFNE, SH2D6, CH25H, FAP, ARL14, CFH, C8ORF4, PRKACB, BRINP3, RBM11, TMEFF2, MAGI3, CYP1A1, SOCS1, PTPRR, SERPING1, PKHD1L1, AADAC, LPAR6, COL1A2, RYR2, SLITRK6, ASB5, SLITRK5, FBXL2, C3AR1, ARPP21, CYP1B1, HMP19, MME, RIMS2, ABCA4, KCNJ2, RIMS1, OR2L13, SESN3, FGG, PEG10, FBXW7, CD69…
GO:0048583~regulation of response to stimulus	0.0135064	NRG4, MASP1, GRIK2, SNCA, TLR1, IL15, IGHM, TLR6, IL31RA, CFHR1, AKR1C3, AGTR1, IFNE, FAP, SEMA3E, RSPO2, C8ORF4, CFH, SEMA3C, CALCRL, PRKACB, SEMA3A, NRG1, MAGI3, PTGER3, SOCS1, PTPRR, NEK10, SERPING1, CLIC2, CTH, EYA1, PPEF2, EREG, LPAR6, COL1A2, FBXL2, C3AR1, CYP1B1, COL3A1, DCN, RIMS2, RIMS1, SESN3, PEG10, FBXW7, FGG, LRRTM3, FIGN, CLEC2B, NPFFR2, IGHA1, IGHA2, WIPF1, EGF, NR1H4, FGD4, SPP1, …
GO:0040012~regulation of locomotion	0.0141659	PTPRC, C3AR1, TMEFF2, NRG4, CYP1B1, SPOCK3, COL3A1, SNCA, PTPRR, HGF, ITGA4, DCN, DACH1, ARID2, LAMA2, MMP10, EREG, SEMA3E, SEMA3C, SEMA3A, NRG1, EGF, BMP5
GO:0050793~regulation of developmental process	0.0142304	SYT1, SYT4, NELL1, ENAM, IL15, OSR2, RSPO2, SEMA3E, C8ORF4, SEMA3C, PRKACB, SEMA3A, BRINP3, NRG1, NEGR1, CTH, EYA1, SLITRK3, EREG, SCIN, SERPINB7, CNTN1, SLITRK6, SLITRK5, C3AR1, CYP1B1, COL3A1, DCN, RIMS2, RIMS1, FGG, FBXW7, LRRTM3, FAT4, WIPF1, EGF, NR1H4, SPP1, FGD4, FLRT3, PTPRD, PTPRZ1, NLGN1, HGF, KCNK2, EPHA3, FOXP2, LAMA2, TENM3, SPTA1, BMP5
GO:0035637~multicellular organismal signaling	0.0144787	CACNA2D1, GRIK2, PLN, SCN2A, SCN9A, CACNB2, RYR2, KCNJ2
GO:0045741~positive regulation of epidermal growth factor-activated receptor activity	0.0147496	FBXW7, EREG, EGF
GO:0099504~synaptic vesicle cycle	0.0147984	SYT1, SYT4, SNCA, NLGN1, SYTL5, RIMS2, RIMS1
GO:0046425~regulation of JAK-STAT cascade	0.0149759	FLRT3, CYP1B1, LRRTM3, IFNE, SOCS1, IL15, DCN, IL31RA
GO:1904892~regulation of STAT cascade	0.0149759	FLRT3, CYP1B1, LRRTM3, IFNE, SOCS1, IL15, DCN, IL31RA
GO:0050767~regulation of neurogenesis	0.0150805	SYT1, PTPRD, SYT4, PTPRZ1, COL3A1, NLGN1, HGF, RIMS2, RIMS1, EPHA3, EYA1, TENM3, SEMA3E, CNTN1, SEMA3C, SEMA3A, BRINP3, NRG1, NEGR1, BMP5, SPP1
GO:0016079~synaptic vesicle exocytosis	0.0166077	SYT1, SYT4, NLGN1, SYTL5, RIMS2, RIMS1
GO:0042326~negative regulation of phosphorylation	0.0168501	FLRT3, PTPRC, NELL1, SNCA, SOCS1, PTPRR, DCN, HGF, SAMSN1, PPP1R1C, GNAQ, PPEF2, LRRTM3, CDKN2C, FABP4
GO:2000145~regulation of cell motility	0.0171304	PTPRC, C3AR1, TMEFF2, NRG4, CYP1B1, SPOCK3, COL3A1, PTPRR, HGF, ITGA4, DCN, DACH1, ARID2, LAMA2, MMP10, EREG, SEMA3E, SEMA3C, SEMA3A, NRG1, EGF, BMP5
GO:0065007~biological regulation	0.0186924	SYT1, KLRC2, KLRC3, SYT4, MASP1, DZIP1, NELL1, SNCA, RORB, IGHM, AGTR1, PPP1R1C, IFNE, FAP, CFH, BRINP3, TMEFF2, MAGI3, CYP1A1, SCN2A, PTPRR, SERPING1, BOLL, ZNF788, AADAC, PRDM9, LPAR6, RYR2, WFDC5, FBXL2, CYP1B1, MME, CACNB2, RIMS2, KCNJ2, ZNF618, RIMS1, HESX1, CD69, IL1RAPL2, NR1H4, SPP1, ASXL3, TRPC4, IKZF2, EPM2A, ESRRG, HGF, SERPINI1, PCDH17, KCNK2, ACPP, SERPINI2, ATP13A4, EPHA3, RERG, LAM…
GO:0006081~cellular aldehyde metabolic process	0.0199457	AKR1C3, CYP1B1, AKR1B10, BMP5, ALDH3A1
GO:0048585~negative regulation of response to stimulus	0.0201537	MASP1, SNCA, COL3A1, DCN, SESN3, FGG, FBXW7, PEG10, LRRTM3, SEMA3E, C8ORF4, SEMA3C, CALCRL, PRKACB, SEMA3A, NRG1, EGF, NR1H4, SPP1, FLRT3, PTPRC, SOCS1, EPM2A, PTPRR, SERPING1, CLIC2, HGF, SAMSN1, RNF43, EYA1, CTH, TRIM59, PPEF2, RGS7, BMP5
GO:0022604~regulation of cell morphogenesis	0.0201553	SYT1, PTPRD, SYT4, ENAM, NLGN1, RIMS2, RIMS1, EPHA3, FGG, SEMA3E, SEMA3C, SEMA3A, SPTA1, WIPF1, NRG1, BMP5, SPP1, FGD4
GO:0001763~morphogenesis of a branching structure	0.0202338	EYA1, FAT4, SEMA3E, RSPO2, SEMA3C, SEMA3A, AREG, HGF, EGF
GO:0044708~single-organism behavior	0.0202506	GLRB, PTPRZ1, GRIK2, EPM2A, SNCA, DGKI, PCDH17, KCNK2, FOXP2, GRM5, BCHE, SCN9A, SLITRK6, SLITRK5
GO:0007267~cell-cell signaling	0.0202884	PPFIA2, VIP, SYT1, SYT4, GRIK2, SNCA, CACNB2, IL15, RIMS2, RIMS1, GPR1, STXBP5L, FGG, CRB1, BCHE, RSPO2, NPFFR2, EGF, NR1H4, GABRG1, CACNA2D1, GLRB, PTPRD, GABRA1, RFX6, NLGN1, DGKI, HGF, GRIA4, PCDH17, GRM5, LAMA2, RNF43, EREG, SYTL5, RYR2, AREG, SLITRK5
GO:0030449~regulation of complement activation	0.020556	C3AR1, MASP1, CFH, SERPING1
GO:0051899~membrane depolarization	0.0207028	CACNA2D1, SCN2A, SCN9A, CACNB2, DCN, KCNJ2
GO:0050727~regulation of inflammatory response	0.0209524	C3AR1, AGTR1, TLR10, PTGER3, MASP1, CFH, FABP4, SERPING1, IL15, CALCRL, HGF, NR1H4
GO:0010720~positive regulation of cell development	0.0210164	SYT1, PTPRD, SYT4, NLGN1, HGF, RIMS2, RIMS1, EPHA3, FGG, TENM3, CNTN1, SEMA3A, BRINP3, NRG1, NEGR1, BMP5
GO:0031344~regulation of cell projection organization	0.0215484	SYT1, PTPRD, SYT4, NLGN1, HGF, RIMS2, RIMS1, EPHA3, GPM6A, TENM3, SEMA3E, CNTN1, SEMA3C, SEMA3A, NRG1, NEGR1, BMP5, SPP1
GO:0002027~regulation of heart rate	0.021594	CACNA2D1, PLN, CACNB2, RYR2, SEMA3A, KCNJ2
GO:0070509~calcium ion import	0.0219223	PTPRC, TRPC4, CACNA2D1, PLN, SNCA, CACNB2, RYR2, CLIC2
GO:0008202~steroid metabolic process	0.0220574	AKR1C3, AFP, AGTR1, CYP39A1, NR1I2, CYP1B1, CYP1A1, CH25H, AKR1B10, NR1H4, BMP5
GO:1902803~regulation of synaptic vesicle transport	0.0222026	SNCA, NLGN1, RIMS2, RIMS1
GO:0006469~negative regulation of protein kinase activity	0.0222952	FLRT3, PTPRC, PPP1R1C, GNAQ, CDKN2C, LRRTM3, NELL1, SOCS1, FABP4, DCN
GO:0050803~regulation of synapse structure or activity	0.0222952	FLRT3, GRM5, SLITRK3, LRRTM3, GRIK2, SNCA, NLGN1, DGKI, SLITRK6, SLITRK5
GO:0030203~glycosaminoglycan metabolic process	0.022587	NDST4, SPOCK3, LUM, IL15, DCN, HGF, HYAL4, EGF
GO:0001503~ossification	0.0228224	NELL1, RORB, MMP16, HGF, MMP13, OSR2, FAT4, RSPO2, AREG, COL11A1, BMP5, COL10A1, SPP1
GO:0048489~synaptic vesicle transport	0.0229604	SYT1, SYT4, SNCA, NLGN1, SYTL5, RIMS2, RIMS1
GO:0097480~establishment of synaptic vesicle localization	0.0229604	SYT1, SYT4, SNCA, NLGN1, SYTL5, RIMS2, RIMS1
GO:0001101~response to acid chemical	0.0230322	AKR1C3, GLRB, BCHE, COL3A1, SOCS1, COL1A2, RORB, BRINP3, NR1H4, EPHA3, SESN3
GO:0048869~cellular developmental process	0.0231197	SYT1, SYT4, DZIP1, NELL1, POU6F2, ENAM, RORB, TTLL7, IL15, SPAG17, IL31RA, AKR1C3, AGTR1, OSR2, CDKN2C, IFNE, SEMA3E, RSPO2, SEMA3C, SEMA3A, BRINP3, NRG1, RBM11, NEGR1, COL11A1, CYP1A1, RXFP1, MDGA2, SOCS1, STMN4, HERC4, BOLL, STYK1, CTH, EYA1, SLITRK3, GNAQ, EREG, SCIN, CNTN1, SLITRK6, COL24A1, SLITRK5, ARL4A, WFIKKN2, LUM, COL3A1, MME, RIMS2, DNAH7, RIMS1, PEG10, FGG, CRB1, GPM6A, BCHE, FAT4, W…
GO:0001558~regulation of cell growth	0.0233846	SYT1, SYT4, RIMS2, RIMS1, N6AMT1, RERG, AGTR1, PPP1R1C, CDKN2C, SEMA3E, SEMA3C, SEMA3A, NRG1, SPP1
GO:0001501~skeletal system development	0.0233965	WFIKKN2, PTPRC, LUM, COL3A1, MMP16, MMP13, EYA1, OSR2, GNAQ, FAT4, SCIN, RSPO2, COL1A2, COL11A1, BMP5, COL10A1
GO:2000257~regulation of protein activation cascade	0.023919	C3AR1, MASP1, CFH, SERPING1
GO:0050731~positive regulation of peptidyl-tyrosine phosphorylation	0.0239581	FBXW7, EREG, CNTN1, IL15, HGF, EGF, NRG1, IL31RA
GO:0050804~modulation of synaptic transmission	0.0241443	LAMA2, GRM5, SYT1, BCHE, GRIK2, SNCA, NLGN1, DGKI, RIMS2, PCDH17, RIMS1
GO:0044092~negative regulation of molecular function	0.0257397	WFIKKN2, SPINK13, CYP1B1, SPOCK3, NELL1, SNCA, DCN, PPP1R1C, LRRTM3, CDKN2C, SERPINB10, NR1H4, FLRT3, PTPRC, SOCS1, CLIC2, SERPING1, HGF, ITGA4, DGKI, SERPINI1, SERPINI2, CSRNP3, CARD16, GNAQ, PLN, SERPINB7, FABP4, WFDC5
GO:0048667~cell morphogenesis involved in neuron differentiation	0.0258035	FLRT3, PTPRD, PTPRZ1, LUM, NLGN1, LAMA2, SLITRK3, MAP2, SEMA3E, SEMA3C, SEMA3A, SPTA1, SLITRK6, NRG1, SLITRK5, SPP1
GO:0060080~inhibitory postsynaptic potential	0.0269108	GRIK2, RIMS2, RIMS1
GO:0042226~interleukin-6 biosynthetic process	0.0269108	EREG, TLR1, TLR6
GO:0030048~actin filament-based movement	0.0271097	CACNA2D1, MYBPC1, PLN, CACNB2, RYR2, WIPF1, KCNJ2
GO:0051046~regulation of secretion	0.0284238	SYT1, TLR10, PTGER3, SYT4, RFX6, SOCS1, TLR1, SNCA, NLGN1, TLR6, RIMS2, RIMS1, STXBP5L, AGTR1, FGG, SCIN, SYTL5, EGF, NRG1, NR1H4
GO:0045859~regulation of protein kinase activity	0.0287084	FLRT3, PTPRC, NELL1, SOCS1, SNCA, NEK10, HGF, DCN, TLR6, FBXW7, PPP1R1C, GNAQ, PPEF2, EREG, LRRTM3, CDKN2C, NPFFR2, FABP4, PRKACB, NRG1, EGF
GO:0097479~synaptic vesicle localization	0.0288998	SYT1, SYT4, SNCA, NLGN1, SYTL5, RIMS2, RIMS1
GO:0030154~cell differentiation	0.0289373	SYT1, SYT4, DZIP1, NELL1, POU6F2, ENAM, RORB, TTLL7, IL15, IL31RA, AKR1C3, AGTR1, OSR2, CDKN2C, IFNE, SEMA3E, RSPO2, SEMA3C, SEMA3A, BRINP3, NRG1, RBM11, NEGR1, COL11A1, CYP1A1, RXFP1, MDGA2, SOCS1, STMN4, HERC4, BOLL, STYK1, CTH, EYA1, SLITRK3, GNAQ, EREG, SCIN, CNTN1, COL24A1, SLITRK6, SLITRK5, ARL4A, WFIKKN2, LUM, COL3A1, RIMS2, RIMS1, PEG10, FGG, CRB1, GPM6A, BCHE, FAT4, OLFM3, SPP1, FLRT3, P…
GO:0006022~aminoglycan metabolic process	0.0292115	NDST4, SPOCK3, LUM, IL15, DCN, HGF, HYAL4, EGF
GO:0065008~regulation of biological quality	0.0295914	SYT1, SYT4, GRIK2, DZIP1, SNCA, STXBP5L, IL31RA, AKR1C3, AGTR1, TMSB15A, FAP, SEMA3E, SEMA3C, SEMA3A, PRKACB, NRG1, PTGER3, SCN2A, SERPING1, CLIC2, BOLL, GRM5, NAALAD2, SLITRK3, GNAQ, LPAR6, SCIN, COL1A2, KCNH7, RYR2, SLITRK6, SLITRK5, VIP, PPFIA2, C3AR1, CYP1B1, COL3A1, MME, CACNB2, DCN, RIMS2, KCNJ2, ABCA4, RIMS1, SESN3, FBXW7, FGG, DGKB, LRRTM3, IGHA1, SCN9A, IGHA2, WIPF1, NR1H4, FGD4, SPP1, F…
GO:0023061~signal release	0.029646	VIP, PPFIA2, SYT1, FGG, SYT4, RFX6, SNCA, NLGN1, SYTL5, DGKI, RIMS2, RIMS1, NR1H4, STXBP5L
GO:0048468~cell development	0.0299082	SYT1, WFIKKN2, SYT4, LUM, DZIP1, COL3A1, RORB, IL15, RIMS2, RIMS1, FGG, CRB1, GPM6A, FAT4, SEMA3E, SEMA3C, SEMA3A, BRINP3, OLFM3, NRG1, COL11A1, NEGR1, SPP1, FLRT3, PTPRC, PTPRD, PTPRZ1, STMN4, NLGN1, MYOZ2, ITGA4, HGF, EPHA3, LAMA2, EYA1, SLITRK3, EREG, GNAQ, MAP2, TENM3, CNTN1, AREG, SPTA1, SLITRK6, SLITRK5, BMP5
GO:0045408~regulation of interleukin-6 biosynthetic process	0.03041	EREG, TLR1, TLR6
GO:0051480~regulation of cytosolic calcium ion concentration	0.0307127	PTPRC, C3AR1, AGTR1, TRPC4, CACNA2D1, PTGER3, LPAR6, PLN, SNCA, RYR2, CLIC2
GO:0048584~positive regulation of response to stimulus	0.0323457	C3AR1, CYP1B1, MASP1, TLR1, SNCA, COL3A1, IL15, DCN, RIMS2, IGHM, TLR6, RIMS1, IL31RA, AKR1C3, CFHR1, AGTR1, FGG, FBXW7, RSPO2, C8ORF4, IGHA1, CFH, IGHA2, PRKACB, WIPF1, EGF, NRG1, NR1H4, PTPRC, TLR10, CR2, PTGER3, RFX6, SOCS1, NLGN1, NEK10, SERPING1, DGKI, HGF, KCNK2, ACPP, EYA1, CTH, EREG, LPAR6, FABP4, BMP5
GO:0033673~negative regulation of kinase activity	0.0327758	FLRT3, PTPRC, PPP1R1C, GNAQ, CDKN2C, LRRTM3, NELL1, SOCS1, FABP4, DCN
GO:0016487~farnesol metabolic process	0.034243	AKR1C3, AKR1B10
GO:0016107~sesquiterpenoid catabolic process	0.034243	AKR1C3, AKR1B10
GO:0016488~farnesol catabolic process	0.034243	AKR1C3, AKR1B10
GO:0007215~glutamate receptor signaling pathway	0.0343598	GRM5, GNAQ, GRIK2, NLGN1, GRIA4
GO:0097553~calcium ion transmembrane import into cytosol	0.03549	PTPRC, CACNA2D1, PLN, SNCA, RYR2, CLIC2
GO:1902656~calcium ion import into cytosol	0.03549	PTPRC, CACNA2D1, PLN, SNCA, RYR2, CLIC2
GO:0086002~cardiac muscle cell action potential involved in contraction	0.0356781	CACNA2D1, CACNB2, RYR2, KCNJ2
GO:0001944~vasculature development	0.0363765	C3AR1, CYP1B1, COL3A1, HGF, DCN, THSD7A, FBXW7, CTH, EYA1, EREG, FAP, SERPINB7, SEMA3E, COL1A2, SEMA3C, CALCRL, EGF, HPGD
GO:0023057~negative regulation of signaling	0.0366221	GRIK2, SNCA, DCN, STXBP5L, SESN3, FGG, FBXW7, PEG10, LRRTM3, BCHE, C8ORF4, PRKACB, NRG1, EGF, NR1H4, FLRT3, PTPRC, SOCS1, EPM2A, PTPRR, CLIC2, HGF, PCDH17, RNF43, EYA1, CTH, TRIM59, PPEF2, RGS7, BMP5
GO:0014066~regulation of phosphatidylinositol 3-kinase signaling	0.0368314	NRG4, EREG, DCN, HGF, EGF, NRG1, FBXL2
GO:0010648~negative regulation of cell communication	0.0368507	GRIK2, SNCA, DCN, STXBP5L, SESN3, FGG, FBXW7, PEG10, LRRTM3, BCHE, C8ORF4, PRKACB, NRG1, EGF, NR1H4, FLRT3, PTPRC, SOCS1, EPM2A, PTPRR, CLIC2, HGF, PCDH17, RNF43, EYA1, CTH, TRIM59, PPEF2, RGS7, BMP5
GO:0050877~neurological system process	0.0373532	CYP1B1, GRIK2, LUM, POU6F2, MME, CACNB2, RORB, ABCA4, RIMS1, OR2L13, HMCN1, BCHE, SCN9A, NRG1, COL11A1, GLRB, OR8G3P, CNTN5, PTPRZ1, SCN2A, EPM2A, NLGN1, DGKI, HGF, OTOGL, KCNK2, ACPP, FOXP2, GRM5, EYA1, PPEF2, SLITRK6
GO:0060415~muscle tissue morphogenesis	0.0374892	XIRP2, COL3A1, RYR2, NRG1, COL11A1
GO:1901019~regulation of calcium ion transmembrane transporter activity	0.0374892	CACNA2D1, PLN, CACNB2, RYR2, CLIC2
GO:0032269~negative regulation of cellular protein metabolic process	0.0375258	WFIKKN2, SPINK13, MASP1, SPOCK3, NELL1, SNCA, DCN, PPP1R1C, LRRTM3, CDKN2C, SERPINB10, FLRT3, PTPRC, SOCS1, PTPRR, SERPING1, HGF, SAMSN1, SERPINI1, SERPINI2, CARD16, PPEF2, GNAQ, SERPINB7, FABP4, WFDC5
GO:0000904~cell morphogenesis involved in differentiation	0.0378861	FLRT3, PTPRD, PTPRZ1, LUM, NLGN1, ITGA4, HGF, EPHA3, LAMA2, FGG, SLITRK3, MAP2, SEMA3E, SEMA3C, SEMA3A, SPTA1, NRG1, SLITRK6, SLITRK5, BMP5, SPP1
GO:0007567~parturition	0.0379092	CYP1A1, RXFP1, HPGD
GO:0002009~morphogenesis of an epithelium	0.0380789	FLRT3, TMEFF2, HGF, MMP12, HESX1, EYA1, FAT4, RSPO2, SEMA3E, RYR2, SEMA3C, SEMA3A, AREG, PRKACB, EGF, BMP5
GO:0030258~lipid modification	0.0387632	AGTR1, NRG4, DGKB, PIK3C2G, CYP1A1, EREG, ABCD2, DGKI, EGF, NRG1
GO:0002673~regulation of acute inflammatory response	0.0391133	C3AR1, PTGER3, MASP1, CFH, SERPING1
GO:0051216~cartilage development	0.0399091	OSR2, LUM, RSPO2, SCIN, COL11A1, MMP13, BMP5, COL10A1
GO:0016049~cell growth	0.040009	FLRT3, SYT1, SYT4, RIMS2, RIMS1, N6AMT1, RERG, PPP1R1C, CDKN2C, SEMA3E, SEMA3C, SEMA3A, NRG1, SPP1
GO:0044273~sulfur compound catabolic process	0.0401475	CTH, LUM, DCN, HYAL4
GO:0043113~receptor clustering	0.0401475	GLRB, GRIK2, NLGN1, ITGA4
GO:0072583~clathrin-mediated endocytosis	0.0401475	SYT1, SNCA, NLGN1, ITGA4
GO:0051248~negative regulation of protein metabolic process	0.040656	WFIKKN2, SPINK13, MASP1, SPOCK3, NELL1, SNCA, DCN, PPP1R1C, LRRTM3, CDKN2C, SERPINB10, NRG1, FLRT3, PTPRC, SOCS1, PTPRR, SERPING1, HGF, SERPINI1, SAMSN1, SERPINI2, CARD16, PPEF2, GNAQ, SERPINB7, FABP4, WFDC5
GO:0006874~cellular calcium ion homeostasis	0.0407085	PTPRC, C3AR1, AGTR1, TRPC4, CACNA2D1, PTGER3, LPAR6, GRIK2, PLN, SNCA, RYR2, CLIC2, ATP13A4
GO:0046903~secretion	0.0409117	PPFIA2, VIP, SYT1, SYT4, TLR1, SNCA, TLR6, RIMS2, RIMS1, STXBP5L, AGTR1, FGG, NRG1, EGF, NR1H4, TLR10, TRPC4, PTGER3, RFX6, SOCS1, NLGN1, SERPING1, HGF, PCDH7, DGKI, SCIN, SYTL5, SLC17A9
GO:0022603~regulation of anatomical structure morphogenesis	0.0414521	C3AR1, SYT1, CYP1B1, SYT4, ENAM, DCN, RIMS2, RIMS1, FGG, FBXW7, OSR2, RSPO2, SEMA3E, SEMA3C, WIPF1, SEMA3A, NRG1, SPP1, FGD4, PTPRD, NLGN1, HGF, FOXP2, EPHA3, EYA1, SPTA1, BMP5
GO:0042127~regulation of cell proliferation	0.0418823	VIP, CYP1B1, NELL1, IL15, ARID2, IL31RA, ALDH3A1, FANCL, AKR1C3, AGTR1, FBXW7, OSR2, BCHE, CDKN2C, FAP, CALCRL, EGF, NRG1, PTPRC, PTPRZ1, BMX, DACH1, HGF, KCNK2, MMP12, DPPA2, FOXP2, RERG, EYA1, STYK1, EREG, SCIN, SERPINB7, MYO16, SPTA1, AREG, BMP5
GO:0010881~regulation of cardiac muscle contraction by regulation of the release of sequestered calcium ion	0.0418956	PLN, RYR2, CLIC2
GO:0086012~membrane depolarization during cardiac muscle cell action potential	0.0418956	CACNA2D1, CACNB2, KCNJ2
GO:0048488~synaptic vesicle endocytosis	0.0418956	SYT1, SNCA, NLGN1
GO:0045956~positive regulation of calcium ion-dependent exocytosis	0.0418956	SYT1, SYT4, NLGN1
GO:1904893~negative regulation of STAT cascade	0.0424834	FLRT3, LRRTM3, SOCS1, DCN
GO:0046426~negative regulation of JAK-STAT cascade	0.0424834	FLRT3, LRRTM3, SOCS1, DCN
GO:0009410~response to xenobiotic stimulus	0.0434102	AADAC, NR1I2, CYP1B1, CYP1A1, SLITRK5, ALDH3A1
GO:0038127~ERBB signaling pathway	0.0436145	FBXW7, NRG4, EREG, PTPRR, AREG, EGF, NRG1
GO:0007204~positive regulation of cytosolic calcium ion concentration	0.0445281	PTPRC, C3AR1, AGTR1, CACNA2D1, PTGER3, LPAR6, PLN, SNCA, RYR2, CLIC2
GO:1902531~regulation of intracellular signal transduction	0.0448055	NRG4, CYP1B1, GRIK2, COL3A1, IL15, DCN, TLR6, IL31RA, SESN3, AKR1C3, FGG, FBXW7, LRRTM3, IFNE, NPFFR2, C8ORF4, EGF, NRG1, NR1H4, FGD4, FLRT3, MAGI3, SOCS1, EPM2A, NLGN1, PTPRR, NEK10, CLIC2, DGKI, HGF, CTH, UACA, TRIM59, EREG, PPEF2, LPAR6, PLN, ARAP2, BMP5, FBXL2
GO:0007200~phospholipase C-activating G-protein coupled receptor signaling pathway	0.0448253	GRM5, C3AR1, AGTR1, PTGER3, GNAQ, LPAR6
GO:0051055~negative regulation of lipid biosynthetic process	0.044886	AKR1C3, FBXW7, NR1H4, BMP5
GO:0050776~regulation of immune response	0.045254	PTPRC, C3AR1, TLR10, CR2, MASP1, COL3A1, SOCS1, TLR1, SERPING1, ITGA4, IL15, IGHM, SAMSN1, TLR6, CFHR1, EREG, CLEC2B, CFH, COL1A2, IGHA1, IGHA2, WIPF1, PRKACB, NR1H4
GO:0035556~intracellular signal transduction	0.0453673	ZMAT1, NRG4, GRIK2, IL15, TLR6, IL31RA, AKR1C3, AGTR1, PPP1R1C, SH2D6, IFNE, ARL14, C8ORF4, NRG1, MAGI3, PIK3C2G, SOCS1, PTPRR, NEK10, CLIC2, CTH, PPEF2, EREG, LPAR6, COL1A2, RYR2, ASB5, ARL4A, FBXL2, RERGL, CYP1B1, COL3A1, DCN, RIMS2, SESN3, FBXW7, FGG, DGKB, LRRTM3, FAT4, NPFFR2, EGF, NR1H4, FGD4, FLRT3, EPM2A, NLGN1, BMX, DGKI, HGF, RERG, UACA, TRIM59, PLN, RGS7, SPTA1, ARAP2, BMP5
GO:0061564~axon development	0.045801	FLRT3, PTPRZ1, LUM, EPHA3, LAMA2, SLITRK3, SEMA3E, SEMA3C, SPTA1, SEMA3A, SLITRK6, NRG1, SLITRK5, SPP1
GO:2000463~positive regulation of excitatory postsynaptic potential	0.0460313	NLGN1, RIMS2, RIMS1
GO:0060445~branching involved in salivary gland morphogenesis	0.0460313	SEMA3C, SEMA3A, HGF
GO:0007186~G-protein coupled receptor signaling pathway	0.046096	VIP, C3AR1, SNCA, HMP19, GNG11, GPR1, OR2L13, AKR1C3, AGTR1, DGKB, NPFFR2, SUCNR1, PRKACB, CALCRL, GABRG1, GLRB, OR8G3P, GABRA1, PTGER3, RXFP1, DGKI, KCNK2, ACPP, GRM5, GNAQ, EREG, LPAR6, PLN, RGS7, AREG, HPGD
GO:0055074~calcium ion homeostasis	0.0489439	PTPRC, C3AR1, AGTR1, TRPC4, CACNA2D1, PTGER3, LPAR6, GRIK2, PLN, SNCA, RYR2, CLIC2, ATP13A4
GO:0050807~regulation of synapse organization	0.0492347	FLRT3, SLITRK3, LRRTM3, NLGN1, SLITRK6, SLITRK5
GO:0048644~muscle organ morphogenesis	0.0496909	XIRP2, COL3A1, RYR2, NRG1, COL11A1
GO:0046579~positive regulation of Ras protein signal transduction	0.0498892	LPAR6, COL3A1, DGKI, NRG1
