# Supplementary material for: BAZ2A-RNA mediated association with TOP2A and KDM1A represses genes implicated in prostate cancer
Source: Life Sci Alliance. 2023 Apr 25;6(7):e202301950. doi: 10.26508/lsa.202301950 (PMC10130768; doi:10.26508/lsa.202301950)
Supplement: Supplementary file 5 [file LSA-2023-01950_TableS3.xlsx]

## Sheet: GO C2-enh genes
GO terms of C2-enhancer upregulated genes in PC3+BAZ2A-DTAM	PValue	Genes
GO:0007265~Ras protein signal transduction	1.62304e-05	PLEKHG3, DAB2IP, MYO9B, CELSR1, ARHGAP35, RHOB, VAV2, BCR, NISCH, ITPKB, PREX1, RASA3, GNA12, TIMP2, WASF2
GO:0051056~regulation of small GTPase mediated signal transduction	3.51598e-05	PLEKHG3, SRC, DAB2IP, MYO9B, SIPA1L3, ARHGAP35, RHOB, VAV2, BCR, ITPKB, PREX1, SIPA1L1, RASA3, TIMP2
GO:0006928~movement of cell or subcellular component	4.05714e-05	CSF1R, FOXC2, ITGB4, SRC, SDC3, CELSR1, ARHGAP35, PTPRF, ACTB, GLI2, EFNB1, PREX1, HRH1, SNX29, KIF3B, GNA12, PLXNA1, WASF2, TNS3, DYNC1H1, NOG, DAB2IP, KIF24, MYO9B, SORL1, PGF, RHOB, VAV2, SKI, BCR, NISCH, SLC7A5, LCK, TYRO3, FSCN1, OGDH, PLXNB2, SDC1, PKN1, KIFC3
GO:0009611~response to wounding	4.47846e-05	FOXC2, DGKD, ITGB4, SRC, DGKA, NOG, CELSR1, PTPRF, ZFP36L2, ACTB, ARHGAP35, RHOB, VAV2, SULF2, EHD1, LCK, NINJ1, GNA12, TYRO3, SDC1, SH2B3
GO:0016477~cell migration	5.96687e-05	CSF1R, FOXC2, SRC, SDC3, CELSR1, ARHGAP35, PTPRF, EFNB1, PREX1, HRH1, GNA12, PLXNA1, WASF2, TNS3, NOG, DAB2IP, SORL1, PGF, RHOB, VAV2, BCR, NISCH, SLC7A5, LCK, TYRO3, FSCN1, OGDH, PLXNB2, SDC1, PKN1
GO:0032502~developmental process	7.17291e-05	CSF2, DGKD, ITGB4, CEP164, CELSR1, SIPA1L3, PTPRF, ACTB, ARHGAP35, GLI2, PREX1, NUDCD3, SIPA1L1, TIMP2, TNS3, USP7, NOG, EN1, KIF24, HSPG2, PGF, RHOB, VAV2, NCOR2, BCR, ITPKB, ANO1, SLC7A5, POR, INF2, EVC, BIN1, LCK, RAB35, NINJ1, TET3, CDH11, TYRO3, FSCN1, ANGPTL2, ATF5, CAMK2B, CSF1R, FOXC2, PFKFB3, COL13A1, SRC, FOXK1, ACACB, EVPL, ZFP36L2, CAMSAP1, EFNB1, KIF3B, CHSY1, CUX1, UCP3, GNA12, HIVE…
GO:0048870~cell motility	8.13315e-05	CSF1R, FOXC2, ITGB4, SRC, SDC3, CELSR1, ARHGAP35, PTPRF, EFNB1, PREX1, HRH1, GNA12, PLXNA1, WASF2, TNS3, NOG, DAB2IP, SORL1, PGF, RHOB, VAV2, SKI, BCR, NISCH, SLC7A5, LCK, TYRO3, FSCN1, OGDH, PLXNB2, SDC1, PKN1
GO:0051674~localization of cell	8.13315e-05	CSF1R, FOXC2, ITGB4, SRC, SDC3, CELSR1, ARHGAP35, PTPRF, EFNB1, PREX1, HRH1, GNA12, PLXNA1, WASF2, TNS3, NOG, DAB2IP, SORL1, PGF, RHOB, VAV2, SKI, BCR, NISCH, SLC7A5, LCK, TYRO3, FSCN1, OGDH, PLXNB2, SDC1, PKN1
GO:0007264~small GTPase mediated signal transduction	9.88554e-05	PLEKHG3, SRC, DAB2IP, MYO9B, CELSR1, ARHGAP35, RHOB, VAV2, BCR, NISCH, ITPKB, PREX1, RASA3, RAB35, GNA12, TIMP2, WASF2, ARL8B
GO:0007275~multicellular organism development	0.000113016	CSF2, DGKD, ITGB4, CELSR1, SIPA1L3, PTPRF, ACTB, ARHGAP35, GLI2, PREX1, NUDCD3, SIPA1L1, TIMP2, TNS3, USP7, NOG, EN1, HSPG2, PGF, RHOB, VAV2, NCOR2, BCR, ITPKB, ANO1, SLC7A5, POR, EVC, BIN1, LCK, RAB35, NINJ1, TET3, CDH11, TYRO3, ANGPTL2, ATF5, CAMK2B, CSF1R, FOXC2, PFKFB3, COL13A1, SRC, FOXK1, ACACB, EVPL, ZFP36L2, CAMSAP1, EFNB1, KIF3B, CHSY1, CUX1, GNA12, HIVEP1, SERPINH1, PLXNA1, MBP, SH2B3, …
GO:0051179~localization	0.000120686	GLTP, LGALS3BP, MCFD2, HIP1, CSF2, DGKD, ITGB4, CTCF, WDR45, CELSR1, PTPRF, ACTB, ARHGAP35, PREX1, GOLGA3, PPP6R3, SLC26A11, TNS3, SUN1, NOG, RHBDF2, RAB3IL1, GRIP2, PGF, RHOB, VAV2, NCOR2, NISCH, BCR, ANO1, SLC7A5, RASA3, BIN1, LCK, RAB35, TYRO3, FSCN1, EXOC3, RIN3, ABCG1, ARL8B, CAMK2B, CSF1R, FOXC2, TTYH3, AP5Z1, TTYH2, SRC, SDC3, LTBP2, DENND3, ACACB, EFNB1, SYNGR1, HRH1, KIF3B, CUX1, UCP3, G…
GO:0022603~regulation of anatomical structure morphogenesis	0.000127683	CAMK2B, CSF1R, FOXC2, SRC, CELSR1, ARHGAP35, CAMSAP1, PREX1, SIPA1L1, CUX1, GNA12, PLXNA1, TBC1D14, TBC1D16, NOG, DAB2IP, PGF, RHOB, SULF2, BCR, EHD1, POR, INF2, FMNL2, CARM1, PLXNB2, PKN1
GO:0048856~anatomical structure development	0.000135239	CSF2, DGKD, ITGB4, CEP164, CELSR1, SIPA1L3, PTPRF, ACTB, ARHGAP35, GLI2, PREX1, NUDCD3, SIPA1L1, TIMP2, TNS3, USP7, NOG, EN1, KIF24, HSPG2, PGF, RHOB, VAV2, NCOR2, BCR, ITPKB, ANO1, SLC7A5, POR, INF2, EVC, BIN1, LCK, RAB35, NINJ1, TET3, CDH11, TYRO3, FSCN1, ANGPTL2, ATF5, CAMK2B, CSF1R, FOXC2, PFKFB3, COL13A1, SRC, FOXK1, ACACB, EVPL, ZFP36L2, CAMSAP1, EFNB1, KIF3B, CHSY1, CUX1, GNA12, HIVEP1, SE…
GO:0044767~single-organism developmental process	0.000137151	CSF2, DGKD, ITGB4, CEP164, CELSR1, SIPA1L3, PTPRF, ACTB, ARHGAP35, GLI2, PREX1, NUDCD3, SIPA1L1, TIMP2, TNS3, USP7, NOG, EN1, KIF24, HSPG2, PGF, RHOB, VAV2, NCOR2, BCR, ITPKB, ANO1, SLC7A5, POR, EVC, BIN1, LCK, RAB35, NINJ1, TET3, CDH11, TYRO3, ANGPTL2, ATF5, CAMK2B, CSF1R, FOXC2, PFKFB3, COL13A1, SRC, FOXK1, ACACB, EVPL, ZFP36L2, CAMSAP1, EFNB1, KIF3B, CHSY1, CUX1, UCP3, GNA12, HIVEP1, SERPINH1,…
GO:0043087~regulation of GTPase activity	0.00030353	PLEKHG3, CAMK2B, CSF2, DAB2IP, MYO9B, RAB3IL1, DENND3, SIPA1L3, ARHGAP35, VAV2, BCR, PREX1, SIPA1L1, RASA3, PLXNB2, SH3BP4, TBC1D14, RIN3, CALM1, TBC1D16
GO:0007169~transmembrane receptor protein tyrosine kinase signaling pathway	0.00038912	CSF1R, FOXC2, DGKD, HIP1, SRC, RHBDF2, NOG, DAB2IP, SOGA1, PGF, ACTB, VAV2, SULF2, ZFYVE28, BCR, EFNB1, SIPA1L1, LCK, WASF2
GO:0042060~wound healing	0.000427923	FOXC2, DGKD, SRC, DGKA, NOG, CELSR1, ACTB, ARHGAP35, RHOB, VAV2, EHD1, LCK, NINJ1, GNA12, TYRO3, SDC1, SH2B3
GO:0048583~regulation of response to stimulus	0.000433729	HIP1, CSF2, SIPA1L3, PTPRF, ACTB, ARHGAP35, GLI2, ZFYVE28, PREX1, SIPA1L1, TIMP2, PLEKHG3, NOG, RHBDF2, PGF, RHOB, DUSP7, VAV2, NCOR2, BCR, ITPKB, ANO1, POR, EVC, RASA3, TRAF3, LCK, PXDN, TYRO3, ZMYND11, CAMK2B, CSF1R, FOXC2, TMEM161A, MVK, SRC, DOT1L, CHSY1, GNA12, CD300LB, PLXNA1, SH3BP4, SH2B3, WASF2, LDLR, NTSR1, AP1M1, FEM1A, WFS1, DAB2IP, PYCR1, MYO9B, SORL1, SULF2, SMARCA4, SKI, TFAP4, CAR…
GO:0040011~locomotion	0.000443235	CSF1R, FOXC2, ITGB4, SRC, SDC3, CELSR1, ARHGAP35, PTPRF, GLI2, EFNB1, PREX1, HRH1, GNA12, PLXNA1, WASF2, TNS3, NOG, DAB2IP, SORL1, PGF, RHOB, VAV2, SKI, BCR, NISCH, SLC7A5, LCK, TYRO3, FSCN1, OGDH, PLXNB2, SDC1, PKN1
GO:0051336~regulation of hydrolase activity	0.000473753	CAMK2B, HIP1, CSF2, SRC, DENND3, ELFN2, SIPA1L3, ARHGAP35, PREX1, SIPA1L1, PPP6R3, TIMP2, SERPINH1, SH3BP4, TBC1D14, TBC1D16, PLEKHG3, DAB2IP, MYO9B, RAB3IL1, SORL1, VAV2, BCR, POR, TFAP4, RASA3, LCK, PLXNB2, RIN3, CALM1
GO:0030168~platelet activation	0.000478679	DGKD, SRC, LCK, DGKA, GNA12, TYRO3, ACTB, VAV2, RHOB
GO:0046578~regulation of Ras protein signal transduction	0.000496599	BCR, ITPKB, PLEKHG3, PREX1, RASA3, DAB2IP, TIMP2, MYO9B, ARHGAP35, VAV2
GO:0048010~vascular endothelial growth factor receptor signaling pathway	0.000534172	FOXC2, SRC, DAB2IP, WASF2, ACTB, PGF, VAV2
GO:0007417~central nervous system development	0.000545586	CSF1R, PFKFB3, SRC, NOG, DAB2IP, EN1, CELSR1, ACTB, ARHGAP35, GLI2, SKI, BCR, BIN1, CDH11, TYRO3, TIMP2, OGDH, PLXNB2, MBP, TACC2, CALM1, ATF5, SSBP3
GO:1902930~regulation of alcohol biosynthetic process	0.0005536	HRH1, POR, SCAP, ABCG1, NTSR1
GO:0009653~anatomical structure morphogenesis	0.000663444	CAMK2B, CSF1R, FOXC2, COL13A1, ITGB4, SRC, CEP164, CELSR1, SIPA1L3, ARHGAP35, CAMSAP1, GLI2, EFNB1, PREX1, SIPA1L1, CHSY1, CUX1, GNA12, SERPINH1, PLXNA1, TBC1D14, WASF2, TBC1D16, ATP8B1, NOG, DAB2IP, EN1, KIF24, HSPG2, PGF, RHOB, SULF2, VAV2, SKI, BCR, EHD1, POR, INF2, FMNL2, CARM1, NINJ1, CDH11, TYRO3, FSCN1, PLXNB2, SDC1, PKN1, SSBP3
GO:0044763~single-organism cellular process	0.000719704	GLTP, DGKD, CSF2, DGKA, CELSR1, SOGA1, ACTB, ARHGAP35, ZFYVE28, PREX1, SLC26A11, TNS3, PDK1, HSPG2, PGF, GRIP2, BCR, NISCH, POR, BIN1, RAB35, TYRO3, FSCN1, RIN3, ATF5, ABCG1, ARL8B, CSF1R, GNAZ, TTYH3, PFKFB3, TMEM161A, COL13A1, TTYH2, SDC3, LTBP2, ACACB, EVPL, ZFP36L2, CAMSAP1, EFNB1, SYNGR1, HRH1, KIF3B, HIVEP1, SERPINH1, SCAP, TBC1D14, PLXNA1, MBP, NTSR1, ST3GAL2, TBC1D16, AP1M1, WFS1, ATP8B1,…
GO:0007420~brain development	0.000732548	CSF1R, PFKFB3, SRC, NOG, DAB2IP, EN1, ACTB, ARHGAP35, GLI2, SKI, BCR, TYRO3, OGDH, PLXNB2, MBP, TACC2, CALM1, ATF5, SSBP3
GO:0035556~intracellular signal transduction	0.000824053	CAMK2B, CSF1R, DGKD, TMEM161A, HIP1, CSF2, SRC, DGKA, DOT1L, CELSR1, SIPA1L3, ARHGAP35, ZFP36L2, PREX1, HRH1, SIPA1L1, GNA12, TIMP2, SH3BP4, SH2B3, WASF2, TNS3, PDK1, PLEKHG3, WFS1, DAB2IP, MYO9B, CORO2A, SORL1, RHOB, VAV2, DUSP7, BCR, NISCH, ITPKB, TFAP4, RASA3, LCK, CARM1, CCDC88C, RAB35, TYRO3, PKN1, ZMYND11, CALM1, MAP3K14, ASB1, ARL8B
GO:0043547~positive regulation of GTPase activity	0.000838157	PLEKHG3, CAMK2B, CSF2, DAB2IP, MYO9B, RAB3IL1, DENND3, SIPA1L3, ARHGAP35, VAV2, BCR, PREX1, SIPA1L1, RASA3, TBC1D14, RIN3, CALM1, TBC1D16
GO:0035295~tube development	0.000885083	CSF1R, FOXC2, ITGB4, SRC, NOG, DAB2IP, EN1, CELSR1, PGF, ARHGAP35, RHOB, GLI2, SKI, PLXNB2, SDC1, SSBP3, TNS3
GO:0048731~system development	0.000909058	CSF2, ITGB4, CELSR1, SIPA1L3, PTPRF, ACTB, ARHGAP35, GLI2, PREX1, SIPA1L1, TIMP2, TNS3, NOG, EN1, HSPG2, PGF, RHOB, VAV2, NCOR2, BCR, ITPKB, SLC7A5, POR, EVC, BIN1, LCK, RAB35, NINJ1, CDH11, TYRO3, ATF5, CAMK2B, CSF1R, FOXC2, PFKFB3, COL13A1, SRC, FOXK1, ACACB, EVPL, ZFP36L2, CAMSAP1, EFNB1, CHSY1, CUX1, SERPINH1, PLXNA1, MBP, SH2B3, WASF2, SLC25A25, WFS1, ATP8B1, DAB2IP, SORL1, SULF2, SMARCA4, E…
GO:0060348~bone development	0.000959275	SKI, POR, CHSY1, COL13A1, SRC, CARM1, SERPINH1, WASF2, SULF2
GO:0044707~single-multicellular organism process	0.000960548	CSF2, DGKD, ITGB4, DGKA, CELSR1, SIPA1L3, PTPRF, ACTB, ARHGAP35, GLI2, PREX1, NUDCD3, SIPA1L1, TIMP2, TNS3, SUN1, USP7, NOG, EN1, HSPG2, PGF, RHOB, VAV2, NCOR2, BCR, ITPKB, ANO1, SLC7A5, POR, EVC, BIN1, TRAF3, LCK, RAB35, NINJ1, TET3, CDH11, TYRO3, ANGPTL2, ATF5, ABCG1, CAMK2B, CSF1R, FOXC2, PFKFB3, COL13A1, SRC, FOXK1, ACACB, EVPL, ZFP36L2, CAMSAP1, EFNB1, HRH1, KIF3B, CHSY1, CUX1, UCP3, GNA12, …
GO:0048513~animal organ development	0.0009724	CSF2, ITGB4, CELSR1, SIPA1L3, ACTB, ARHGAP35, GLI2, PREX1, TNS3, NOG, EN1, PGF, NCOR2, BCR, ITPKB, POR, EVC, LCK, NINJ1, TYRO3, ATF5, CSF1R, FOXC2, PFKFB3, COL13A1, SRC, FOXK1, ACACB, EVPL, ZFP36L2, EFNB1, CHSY1, SERPINH1, PLXNA1, MBP, SH2B3, WASF2, SLC25A25, WFS1, ATP8B1, DAB2IP, SULF2, SMARCA4, SKI, CARM1, FASN, OGDH, PLXNB2, SDC1, PKN1, TACC2, CALM1, SSBP3, ASB1
GO:0007010~cytoskeleton organization	0.00108248	CSF1R, HIP1, SRC, CELSR1, RNF4, SIPA1L3, ARHGAP35, CAMSAP1, ACTB, PREX1, SIPA1L1, KIF3B, MYBL2, WASF2, PDLIM7, DYNC1H1, SUN1, KIF24, CORO2A, BCR, NISCH, INF2, FMNL2, FSCN1, TACC2, ATF5
GO:0048666~neuron development	0.00128156	CAMK2B, CSF1R, ATP8B1, NOG, DAB2IP, EN1, PTPRF, CAMSAP1, ARHGAP35, GLI2, SKI, EHD1, PREX1, EFNB1, SIPA1L1, CUX1, CARM1, RAB35, CDH11, OGDH, PLXNB2, PLXNA1, ATF5
GO:0060322~head development	0.00131028	CSF1R, PFKFB3, SRC, NOG, DAB2IP, EN1, ACTB, ARHGAP35, GLI2, SKI, BCR, TYRO3, OGDH, PLXNB2, MBP, TACC2, CALM1, ATF5, SSBP3
GO:0001501~skeletal system development	0.00133409	FOXC2, COL13A1, SRC, NOG, EN1, GLI2, SULF2, SKI, POR, EVC, CHSY1, CARM1, CDH11, SERPINH1, WASF2
GO:0006066~alcohol metabolic process	0.00137158	ITPKB, HRH1, POR, MVK, OSBPL5, SCAP, CALM1, LDLR, SORL1, ABCG1, NTSR1
GO:1902932~positive regulation of alcohol biosynthetic process	0.00138928	HRH1, POR, ABCG1, NTSR1
GO:0061448~connective tissue development	0.00144156	FOXC2, POR, EVC, CHSY1, CARM1, NOG, SERPINH1, SLC25A25, GLI2, SULF2
GO:0044255~cellular lipid metabolic process	0.00153685	GLTP, CSF1R, DGKD, MVK, SRC, DGKA, SDC3, DAB2IP, SYNJ2, ACACB, EFR3B, HSPG2, VAV2, NCOR2, POR, LCK, CARM1, FASN, UCP3, SDC1, SCAP, LDLR, ST3GAL2, PDK1
GO:0044710~single-organism metabolic process	0.00165255	GLTP, PYGB, MCFD2, KDM5C, CSF2, DGKD, ALAS1, DGKA, SOGA1, TIMP2, XXYLT1, PDK1, HSPG2, DUSP7, VAV2, NCOR2, NISCH, ITPKB, SLC7A5, POR, RASA3, LCK, PXDN, TET3, TYRO3, ZMYND11, TKT, ABCG1, CAMK2B, CSF1R, PDXK, PFKFB3, MVK, COL13A1, SRC, SDC3, ACACB, ZFP36L2, TBRG4, HRH1, UCP3, SERPINH1, SCAP, LDLR, NTSR1, ST3GAL2, SLC25A25, OSBPL5, WFS1, ATP8B1, DAB2IP, PYCR1, SYNJ2, MUC5B, EFR3B, SORL1, SLC6A6, CARM…
GO:0007399~nervous system development	0.00190581	CAMK2B, CSF1R, PFKFB3, SRC, CELSR1, ARHGAP35, PTPRF, CAMSAP1, ACTB, GLI2, EFNB1, PREX1, SIPA1L1, CUX1, TIMP2, PLXNA1, MBP, ATP8B1, NOG, DAB2IP, EN1, SORL1, SMARCA4, SULF2, SKI, BCR, EHD1, SLC7A5, BIN1, CARM1, RAB35, NINJ1, CDH11, TYRO3, OGDH, PLXNB2, TACC2, ATF5, CALM1, SSBP3
GO:0008203~cholesterol metabolic process	0.00191613	POR, MVK, OSBPL5, SCAP, LDLR, SORL1, ABCG1
GO:0022604~regulation of cell morphogenesis	0.00195949	CAMK2B, CSF1R, SRC, NOG, DAB2IP, CAMSAP1, ARHGAP35, PREX1, FMNL2, SIPA1L1, CUX1, GNA12, PLXNB2, PLXNA1, TBC1D14, TBC1D16
GO:0006629~lipid metabolic process	0.00199544	GLTP, CSF1R, DGKD, MVK, SRC, DGKA, SDC3, ACACB, UCP3, SCAP, LDLR, ST3GAL2, PDK1, OSBPL5, ATP8B1, DAB2IP, SYNJ2, EFR3B, HSPG2, SORL1, VAV2, NCOR2, POR, LCK, CARM1, FASN, SDC1, ABCG1
GO:0035239~tube morphogenesis	0.00199913	SKI, CSF1R, FOXC2, SRC, NOG, DAB2IP, PLXNB2, CELSR1, PGF, ARHGAP35, GLI2, RHOB
GO:0031344~regulation of cell projection organization	0.00209632	CAMK2B, ATP8B1, SRC, DAB2IP, PTPRF, ARHGAP35, PREX1, SIPA1L1, CUX1, CARM1, FSCN1, PLXNB2, PLXNA1, TBC1D14, WASF2, TBC1D16
GO:0044699~single-organism process	0.00215088	GLTP, DGKD, CSF2, DGKA, CELSR1, SOGA1, ACTB, ARHGAP35, ZFYVE28, PREX1, GOLGA3, SLC26A11, TNS3, PDK1, USP7, HSPG2, PGF, GRIP2, BCR, NISCH, POR, BIN1, RAB35, NINJ1, TYRO3, FSCN1, RIN3, ATF5, ABCG1, ARL8B, CSF1R, GNAZ, TTYH3, PFKFB3, TMEM161A, COL13A1, TTYH2, SDC3, LTBP2, ACACB, EVPL, ZFP36L2, CAMSAP1, EFNB1, SYNGR1, HRH1, KIF3B, HIVEP1, SERPINH1, SCAP, TBC1D14, PLXNA1, MBP, NTSR1, ST3GAL2, TBC1D16,…
GO:0021915~neural tube development	0.00231385	SKI, NOG, EN1, PLXNB2, CELSR1, SSBP3, ARHGAP35, GLI2
GO:1902115~regulation of organelle assembly	0.00231385	CSF2, SRC, FSCN1, TBC1D14, SDC1, RNF4, ARHGAP35, TBC1D16
GO:1902652~secondary alcohol metabolic process	0.00247654	POR, MVK, OSBPL5, SCAP, LDLR, SORL1, ABCG1
GO:0007167~enzyme linked receptor protein signaling pathway	0.00252237	CSF1R, FOXC2, DGKD, HIP1, SRC, RHBDF2, NOG, DAB2IP, LTBP2, SOGA1, PTPRF, PGF, ACTB, VAV2, SULF2, SKI, ZFYVE28, BCR, EFNB1, SIPA1L1, LCK, WASF2
GO:0016192~vesicle-mediated transport	0.00263054	LGALS3BP, MCFD2, DGKD, HIP1, SRC, ACTB, GOLGA3, KIF3B, CUX1, PPP6R3, SH3BP4, TBC1D14, LDLR, WASF2, PDLIM7, TBC1D16, AP1M1, DYNC1H1, OSBPL5, SORL1, VAV2, BCR, EHD1, BIN1, RAB35, TYRO3, EXOC3, SDC1, RIN3, CALM1
GO:0048519~negative regulation of biological process	0.00264398	KDM5C, CSF2, NAT10, CTCF, ELFN2, SOGA1, ARHGAP35, GLI2, ZFYVE28, BCL7A, TIMP2, USP7, NOG, RHBDF2, VSTM2L, EN1, RHOB, DUSP7, NCOR2, NISCH, BCR, ITPKB, POR, RASA3, TRAF3, LCK, CTDSP2, PXDN, TYRO3, ZMYND11, ATF5, ABCG1, CSF1R, FOXC2, TMEM161A, NFIX, MVK, SRC, DOT1L, FOXK1, RNF4, ACACB, ZFP36L2, TBRG4, CHSY1, CUX1, HIVEP1, SERPINH1, SCAP, TBC1D14, SH3BP4, WASF2, TP53I11, LDLR, NTSR1, FEM1A, WFS1, ATP…
GO:0060562~epithelial tube morphogenesis	0.00269598	SKI, CSF1R, FOXC2, SRC, NOG, PLXNB2, CELSR1, PGF, ARHGAP35, GLI2, RHOB
GO:0098609~cell-cell adhesion	0.00293742	COL13A1, SRC, CELSR1, EVPL, ZFP36L2, ACTB, GLI2, EFNB1, PREX1, GOLGA3, EFHD2, WASF2, DAB2IP, EHD1, ITPKB, FMNL2, LCK, FASN, CDH11, TYRO3, FSCN1, EXOC3, PLXNB2, KIFC3, MAP3K14
GO:1902117~positive regulation of organelle assembly	0.00296079	CSF2, SRC, FSCN1, SDC1, ARHGAP35
GO:0030030~cell projection organization	0.00300238	CAMK2B, CSF1R, SRC, CEP164, ARHGAP35, PTPRF, CAMSAP1, GLI2, EFNB1, PREX1, SIPA1L1, CUX1, PLXNA1, TBC1D14, WASF2, TBC1D16, ATP8B1, NOG, DAB2IP, KIF24, VAV2, EHD1, CARM1, RAB35, CDH11, FSCN1, PLXNB2
GO:0023051~regulation of signaling	0.00330823	HIP1, CSF2, SIPA1L3, ARHGAP35, GLI2, ZFYVE28, PREX1, SIPA1L1, TIMP2, PLEKHG3, NOG, RHBDF2, RHOB, DUSP7, VAV2, NISCH, BCR, ITPKB, ANO1, POR, EVC, RASA3, LCK, PXDN, TYRO3, ZMYND11, CAMK2B, CSF1R, TMEM161A, SRC, DOT1L, SYNGR1, HRH1, CHSY1, GNA12, SH3BP4, SH2B3, NTSR1, TBC1D16, WFS1, DAB2IP, MYO9B, SORL1, SULF2, SMARCA4, SKI, TFAP4, CARM1, PKN1, CALM1, MAP3K14
GO:0016125~sterol metabolic process	0.00340526	POR, MVK, OSBPL5, SCAP, LDLR, SORL1, ABCG1
GO:0051345~positive regulation of hydrolase activity	0.00353991	PLEKHG3, CAMK2B, HIP1, CSF2, DAB2IP, MYO9B, RAB3IL1, DENND3, SIPA1L3, ARHGAP35, VAV2, BCR, PREX1, TFAP4, SIPA1L1, RASA3, LCK, TBC1D14, RIN3, CALM1, TBC1D16
GO:0016043~cellular component organization	0.00386283	MCFD2, KDM5C, HIP1, CSF2, DGKD, ALAS1, ITGB4, CEP164, NAT10, CTCF, WDR45, CELSR1, SIPA1L3, PTPRF, ACTB, ARHGAP35, GLI2, PREX1, SIPA1L1, PPP6R3, TIMP2, MYBL2, SUN1, USP7, NOG, KIF24, HSPG2, VAV2, NISCH, BCR, INF2, BIN1, RAB35, PXDN, TET3, CDH11, TYRO3, FSCN1, KIFC3, ZMYND11, ATF5, ABCG1, CAMK2B, CSF1R, FOXC2, COL13A1, SRC, DOT1L, LTBP2, FOXK1, RNF4, ACACB, CAMSAP1, EFNB1, CHRAC1, KIF3B, CUX1, GNA1…
GO:0065009~regulation of molecular function	0.00389125	CAMK2B, CSF1R, HIP1, CSF2, SRC, DOT1L, DENND3, CTCF, ELFN2, ACACB, SIPA1L3, ARHGAP35, PTPRF, ZFYVE28, PREX1, SIPA1L1, PPP6R3, TIMP2, SERPINH1, SH3BP4, TBC1D14, NTSR1, TBC1D16, PLEKHG3, USP7, FEM1A, WFS1, NOG, DAB2IP, MYO9B, RAB3IL1, SORL1, SMARCA4, VAV2, DUSP7, SKI, BCR, POR, TFAP4, RASA3, TRAF3, LCK, CARM1, PLXNB2, RIN3, PKN1, CALM1, MAP3K14
GO:0010646~regulation of cell communication	0.00397322	HIP1, CSF2, SIPA1L3, ARHGAP35, GLI2, ZFYVE28, PREX1, SIPA1L1, TIMP2, PLEKHG3, NOG, RHBDF2, RHOB, DUSP7, VAV2, NISCH, BCR, ITPKB, ANO1, POR, EVC, RASA3, LCK, PXDN, TYRO3, ZMYND11, CAMK2B, CSF1R, TMEM161A, SRC, DOT1L, SYNGR1, HRH1, CHSY1, GNA12, SH3BP4, SH2B3, NTSR1, WFS1, DAB2IP, MYO9B, SORL1, SULF2, SMARCA4, SKI, TFAP4, CARM1, PKN1, CALM1, MAP3K14
GO:0051216~cartilage development	0.00469292	POR, EVC, CHSY1, CARM1, NOG, SERPINH1, GLI2, SULF2
GO:0007155~cell adhesion	0.00472718	LGALS3BP, FOXC2, PTPRS, COL13A1, ITGB4, SRC, CELSR1, EVPL, PTPRF, ZFP36L2, ACTB, GLI2, EFNB1, PREX1, GOLGA3, EFHD2, WASF2, DAB2IP, RHOB, EHD1, ITPKB, FMNL2, LCK, FASN, NINJ1, CDH11, TYRO3, FSCN1, EXOC3, PLXNB2, KIFC3, MAP3K14
GO:0006950~response to stress	0.00480007	LGALS3BP, CSF2, DGKD, ITGB4, DGKA, CEP164, CELSR1, PTPRF, ACTB, ARHGAP35, PDK1, USP7, NOG, PGF, RHOB, VAV2, BCR, ANO1, TRAF3, LCK, CTDSP2, PXDN, NINJ1, TYRO3, ZMYND11, CAMK2B, CSF1R, FOXC2, TMEM161A, MVK, AP5Z1, SRC, DOT1L, ZFP36L2, HRH1, UCP3, GNA12, CD300LB, SERPINH1, SCAP, SH2B3, TP53I11, LDLR, AP1M1, FEM1A, WFS1, DAB2IP, PYCR1, TRPV3, MUC5B, SULF2, EHD1, TFAP4, TBL2, CARM1, CCDC88C, SDC1, PKN1
GO:0043085~positive regulation of catalytic activity	0.00483244	CAMK2B, CSF1R, HIP1, CSF2, SRC, DENND3, SIPA1L3, ARHGAP35, PREX1, SIPA1L1, TIMP2, TBC1D14, TBC1D16, PLEKHG3, WFS1, DAB2IP, MYO9B, RAB3IL1, SORL1, VAV2, DUSP7, BCR, POR, TFAP4, RASA3, LCK, RIN3, PKN1, CALM1, MAP3K14
GO:0022610~biological adhesion	0.00497621	LGALS3BP, FOXC2, PTPRS, COL13A1, ITGB4, SRC, CELSR1, EVPL, PTPRF, ZFP36L2, ACTB, GLI2, EFNB1, PREX1, GOLGA3, EFHD2, WASF2, DAB2IP, RHOB, EHD1, ITPKB, FMNL2, LCK, FASN, NINJ1, CDH11, TYRO3, FSCN1, EXOC3, PLXNB2, KIFC3, MAP3K14
GO:0048699~generation of neurons	0.00523334	CAMK2B, CSF1R, CELSR1, ARHGAP35, PTPRF, CAMSAP1, GLI2, EFNB1, PREX1, SIPA1L1, CUX1, TIMP2, PLXNA1, ATP8B1, NOG, DAB2IP, EN1, SORL1, SKI, EHD1, BIN1, CARM1, RAB35, CDH11, OGDH, PLXNB2, ATF5
GO:0071803~positive regulation of podosome assembly	0.00534369	CSF2, SRC, FSCN1
GO:0007596~blood coagulation	0.00546864	EHD1, DGKD, SRC, LCK, DGKA, GNA12, TYRO3, SH2B3, ACTB, VAV2, RHOB
GO:0043114~regulation of vascular permeability	0.00547518	BCR, HRH1, SRC, ARHGAP35
GO:0046165~alcohol biosynthetic process	0.00616533	HRH1, POR, MVK, SCAP, ABCG1, NTSR1
GO:0051128~regulation of cellular component organization	0.00624653	CAMK2B, CSF1R, HIP1, CSF2, SRC, NAT10, FOXK1, CTCF, CELSR1, RNF4, ARHGAP35, PTPRF, CAMSAP1, PREX1, SIPA1L1, CUX1, GNA12, PLXNA1, SH3BP4, TBC1D14, WASF2, TBC1D16, USP7, ATP8B1, NOG, DAB2IP, SORL1, SMARCA4, SKI, BCR, EHD1, INF2, FMNL2, BIN1, CARM1, FSCN1, PLXNB2, PLEKHM2, SDC1, ATF5
GO:0030154~cell differentiation	0.00663174	HIP1, CSF2, ITGB4, CELSR1, SIPA1L3, PTPRF, ARHGAP35, GLI2, PREX1, SIPA1L1, TIMP2, MYBL2, NOG, EN1, PGF, RHOB, ITPKB, SLC7A5, POR, BIN1, LCK, RAB35, CDH11, TYRO3, ATF5, ABCG1, CAMK2B, CSF1R, FOXC2, COL13A1, SRC, FOXK1, EVPL, ZFP36L2, CAMSAP1, EFNB1, CHSY1, CUX1, GNA12, SERPINH1, PLXNA1, SH2B3, WASF2, PDLIM7, AP1M1, ATP8B1, DAB2IP, SORL1, SULF2, EHD1, SKI, CARM1, FASN, OGDH, PLXNB2, SDC1, SSBP3
GO:0001763~morphogenesis of a branching structure	0.00664883	FOXC2, COL13A1, SRC, NOG, PLXNA1, CELSR1, PGF, GLI2
GO:0051098~regulation of binding	0.00702016	SKI, TFAP4, SRC, CARM1, NOG, DOT1L, DAB2IP, CALM1, SORL1, PTPRF
GO:0021772~olfactory bulb development	0.00704901	SKI, CSF1R, OGDH, ATF5
GO:0048468~cell development	0.00711816	CAMK2B, CSF1R, FOXC2, SRC, SIPA1L3, ARHGAP35, PTPRF, CAMSAP1, GLI2, EFNB1, PREX1, SIPA1L1, CHSY1, CUX1, TIMP2, SERPINH1, PLXNA1, WASF2, ATP8B1, NOG, DAB2IP, EN1, SORL1, SULF2, SKI, EHD1, BIN1, CARM1, RAB35, CDH11, TYRO3, OGDH, PLXNB2, SDC1, ATF5
GO:0009966~regulation of signal transduction	0.00736806	CSF1R, TMEM161A, HIP1, CSF2, SRC, DOT1L, SIPA1L3, ARHGAP35, GLI2, ZFYVE28, PREX1, SIPA1L1, CHSY1, GNA12, TIMP2, SH3BP4, SH2B3, NTSR1, PLEKHG3, WFS1, NOG, RHBDF2, DAB2IP, MYO9B, SORL1, RHOB, SMARCA4, SULF2, VAV2, DUSP7, SKI, BCR, ITPKB, POR, EVC, TFAP4, RASA3, LCK, CARM1, PXDN, TYRO3, PKN1, ZMYND11, CALM1, MAP3K14
GO:0044723~single-organism carbohydrate metabolic process	0.00738712	PYGB, MCFD2, PFKFB3, SRC, MUC5B, SOGA1, NISCH, HRH1, TET3, OGDH, XXYLT1, CALM1, TKT, ST3GAL2, NTSR1, PDK1
GO:0048869~cellular developmental process	0.00738716	HIP1, CSF2, ITGB4, CEP164, CELSR1, SIPA1L3, PTPRF, ARHGAP35, GLI2, PREX1, SIPA1L1, TIMP2, MYBL2, NOG, EN1, KIF24, PGF, RHOB, ITPKB, SLC7A5, POR, BIN1, LCK, RAB35, CDH11, TYRO3, ATF5, ABCG1, CAMK2B, CSF1R, FOXC2, COL13A1, SRC, FOXK1, EVPL, ZFP36L2, CAMSAP1, EFNB1, CHSY1, CUX1, GNA12, SERPINH1, TBC1D14, PLXNA1, SH2B3, WASF2, PDLIM7, TBC1D16, AP1M1, ATP8B1, DAB2IP, SORL1, SULF2, EHD1, SKI, CARM1, FA…
GO:0050817~coagulation	0.00745353	EHD1, DGKD, SRC, LCK, DGKA, GNA12, TYRO3, SH2B3, ACTB, VAV2, RHOB
GO:0007599~hemostasis	0.00745353	EHD1, DGKD, SRC, LCK, DGKA, GNA12, TYRO3, SH2B3, ACTB, VAV2, RHOB
GO:0021988~olfactory lobe development	0.00762702	SKI, CSF1R, OGDH, ATF5
GO:0060601~lateral sprouting from an epithelium	0.00772233	NOG, CELSR1, GLI2
GO:0050793~regulation of developmental process	0.00780457	CAMK2B, CSF1R, FOXC2, SRC, CELSR1, ACACB, ARHGAP35, PTPRF, CAMSAP1, ZFP36L2, GLI2, PREX1, SIPA1L1, CUX1, GNA12, TIMP2, PLXNA1, TBC1D14, TBC1D16, NOG, DAB2IP, SORL1, PGF, RHOB, SULF2, SKI, BCR, EHD1, ITPKB, POR, INF2, FMNL2, BIN1, CARM1, PLXNB2, PKN1, SSBP3
GO:0030900~forebrain development	0.00794282	SKI, CSF1R, SRC, NOG, DAB2IP, TYRO3, OGDH, TACC2, ATF5, ARHGAP35, GLI2
GO:0010033~response to organic substance	0.00820263	CAMK2B, CSF1R, FOXC2, DGKD, TMEM161A, CSF2, SRC, LTBP2, RNF4, ACACB, SOGA1, ZFP36L2, GLI2, HRH1, UCP3, TIMP2, SERPINH1, SCAP, SH3BP4, LDLR, NTSR1, WFS1, NOG, DAB2IP, PGF, SMARCA4, SULF2, NCOR2, SKI, BCR, EHD1, ANO1, POR, TFAP4, TBL2, TRAF3, CARM1, FASN, CTDSP2, RAB35, PXDN, SDC1, ZNF236, CALM1, MAP3K14, ABCG1
GO:0044093~positive regulation of molecular function	0.00825089	CAMK2B, CSF1R, HIP1, CSF2, SRC, DENND3, SIPA1L3, ARHGAP35, PREX1, SIPA1L1, TIMP2, TBC1D14, NTSR1, TBC1D16, PLEKHG3, WFS1, DAB2IP, MYO9B, RAB3IL1, SORL1, SMARCA4, VAV2, DUSP7, SKI, BCR, POR, TFAP4, RASA3, LCK, RIN3, PKN1, CALM1, MAP3K14
GO:0007166~cell surface receptor signaling pathway	0.00828105	CAMK2B, CSF1R, FOXC2, DGKD, HIP1, CSF2, ITGB4, SRC, LTBP2, CELSR1, SOGA1, PTPRF, ACTB, GLI2, ZFYVE28, EFNB1, SIPA1L1, CHSY1, PLXNA1, WASF2, NTSR1, NOG, RHBDF2, DAB2IP, MYO9B, GRIP2, PGF, SMARCA4, SULF2, VAV2, SKI, BCR, ITPKB, POR, EVC, TRAF3, LCK, CCDC88C, PXDN, PLXNB2, SDC1, ZMYND11, CALM1, MAP3K14
GO:0006897~endocytosis	0.00831983	LGALS3BP, DGKD, HIP1, SRC, SORL1, ACTB, VAV2, BCR, EHD1, BIN1, TYRO3, SH3BP4, RIN3, LDLR, WASF2, PDLIM7
GO:0071840~cellular component organization or biogenesis	0.00834586	MCFD2, KDM5C, HIP1, CSF2, DGKD, ALAS1, ITGB4, CEP164, NAT10, CTCF, WDR45, CELSR1, SIPA1L3, PTPRF, ACTB, ARHGAP35, GLI2, PREX1, SIPA1L1, PPP6R3, TIMP2, MYBL2, SUN1, USP7, NOG, KIF24, HSPG2, VAV2, NISCH, BCR, INF2, BIN1, RAB35, PXDN, TET3, CDH11, TYRO3, FSCN1, KIFC3, ZMYND11, ATF5, ABCG1, CAMK2B, CSF1R, FOXC2, COL13A1, SRC, DOT1L, LTBP2, FOXK1, RNF4, ACACB, CAMSAP1, EFNB1, CHRAC1, KIF3B, CUX1, GNA1…
GO:0021954~central nervous system neuron development	0.00840344	CDH11, OGDH, ATF5, ARHGAP35, GLI2
GO:0045892~negative regulation of transcription, DNA-templated	0.00845368	FOXC2, KDM5C, NFIX, WFS1, ATP8B1, SRC, NOG, DOT1L, DAB2IP, EN1, FOXK1, CTCF, ARHGAP35, SMARCA4, GLI2, SKI, NCOR2, TFAP4, CUX1, BCL7A, HIVEP1, ZMYND11, ATF5
GO:0045540~regulation of cholesterol biosynthetic process	0.00905924	POR, SCAP, ABCG1
GO:0007165~signal transduction	0.00922581	LGALS3BP, HIP1, CSF2, DGKD, ITGB4, DGKA, CELSR1, SOGA1, SIPA1L3, PTPRF, ACTB, ARHGAP35, GLI2, ZFYVE28, PREX1, SIPA1L1, TIMP2, TNS3, PDK1, PLEKHG3, NOG, RHBDF2, GRIP2, PGF, RHOB, DUSP7, VAV2, NISCH, BCR, ITPKB, ANO1, POR, EVC, RASA3, TRAF3, LCK, CTDSP2, RAB35, PXDN, TYRO3, RIN3, ZMYND11, ARL8B, CAMK2B, CSF1R, GNAZ, FOXC2, TMEM161A, SRC, DOT1L, LTBP2, RNF4, ZFP36L2, EFNB1, HRH1, CHSY1, GNA12, HIVEP…
GO:0048193~Golgi vesicle transport	0.0102665	DYNC1H1, GOLGA3, MCFD2, CUX1, KIF3B, OSBPL5, PPP6R3, RAB35, TBC1D14, SORL1
GO:0009890~negative regulation of biosynthetic process	0.010286	FOXC2, KDM5C, NFIX, SRC, DOT1L, NAT10, FOXK1, CTCF, SOGA1, ARHGAP35, ZFP36L2, GLI2, BCL7A, CUX1, HIVEP1, SCAP, ATP8B1, WFS1, NOG, DAB2IP, EN1, SMARCA4, NCOR2, SKI, TFAP4, ZMYND11, ATF5, ASB1
GO:0050767~regulation of neurogenesis	0.0103369	CAMK2B, NOG, DAB2IP, SORL1, PTPRF, ARHGAP35, GLI2, SKI, PREX1, SIPA1L1, CUX1, BIN1, CARM1, TIMP2, PLXNB2, PLXNA1
GO:0071801~regulation of podosome assembly	0.0104914	CSF2, SRC, FSCN1
GO:0060491~regulation of cell projection assembly	0.010618	ATP8B1, SRC, FSCN1, TBC1D14, WASF2, ARHGAP35, TBC1D16
GO:0030182~neuron differentiation	0.0108652	CAMK2B, CSF1R, ATP8B1, NOG, DAB2IP, EN1, PTPRF, CAMSAP1, ARHGAP35, GLI2, SKI, EHD1, PREX1, EFNB1, SIPA1L1, CUX1, CARM1, RAB35, CDH11, TIMP2, OGDH, PLXNB2, PLXNA1, ATF5
GO:0031175~neuron projection development	0.010929	CAMK2B, CSF1R, NOG, DAB2IP, PTPRF, CAMSAP1, ARHGAP35, GLI2, EHD1, PREX1, EFNB1, SIPA1L1, CUX1, CARM1, RAB35, CDH11, PLXNB2, PLXNA1
GO:0046580~negative regulation of Ras protein signal transduction	0.0109303	RASA3, DAB2IP, TIMP2, ARHGAP35
GO:0022008~neurogenesis	0.0116376	CAMK2B, CSF1R, CELSR1, ARHGAP35, PTPRF, CAMSAP1, GLI2, EFNB1, PREX1, SIPA1L1, CUX1, TIMP2, PLXNA1, ATP8B1, NOG, DAB2IP, EN1, SORL1, SKI, EHD1, BIN1, CARM1, RAB35, CDH11, OGDH, PLXNB2, ATF5
GO:0051058~negative regulation of small GTPase mediated signal transduction	0.0116753	RASA3, DAB2IP, TIMP2, ARHGAP35
GO:0050878~regulation of body fluid levels	0.0117008	DGKD, WFS1, SRC, DGKA, ACTB, RHOB, VAV2, NCOR2, EHD1, LCK, GNA12, TYRO3, SH2B3
GO:0044262~cellular carbohydrate metabolic process	0.0117791	PYGB, HRH1, PFKFB3, SRC, CALM1, ACACB, SOGA1, NTSR1, PDK1
GO:0071800~podosome assembly	0.0120166	CSF2, SRC, FSCN1
GO:0023052~signaling	0.012095	LGALS3BP, HIP1, CSF2, PTPRS, DGKD, ITGB4, DGKA, CELSR1, SOGA1, SIPA1L3, PTPRF, ACTB, ARHGAP35, GLI2, ZFYVE28, PREX1, SIPA1L1, TIMP2, TNS3, PDK1, DLGAP4, PLEKHG3, NOG, RHBDF2, GRIP2, PGF, RHOB, DUSP7, VAV2, NISCH, BCR, ITPKB, ANO1, POR, EVC, RASA3, TRAF3, LCK, CTDSP2, RAB35, PXDN, TYRO3, RIN3, ZMYND11, ARL8B, CAMK2B, CSF1R, GNAZ, FOXC2, TMEM161A, SRC, DOT1L, LTBP2, RNF4, ZFP36L2, EFNB1, SYNGR1, HR…
GO:0031324~negative regulation of cellular metabolic process	0.0121821	FOXC2, KDM5C, NFIX, SRC, DOT1L, NAT10, FOXK1, CTCF, RNF4, ELFN2, ACACB, SOGA1, ARHGAP35, ZFP36L2, GLI2, ZFYVE28, BCL7A, CUX1, HIVEP1, TIMP2, SERPINH1, ATP8B1, WFS1, NOG, DAB2IP, EN1, SORL1, SMARCA4, DUSP7, NCOR2, SKI, POR, TFAP4, CTDSP2, PKN1, ZMYND11, ATF5, CALM1, ASB1
GO:0048522~positive regulation of cellular process	0.0122321	HIP1, CSF2, CTCF, ARHGAP35, GLI2, PREX1, ZMIZ2, TIMP2, MYBL2, TNS3, NOG, EN1, PGF, RHOB, DUSP7, VAV2, NCOR2, BCR, ITPKB, ANO1, POR, EVC, BIN1, LCK, TET3, FSCN1, ATF5, CAMK2B, CSF1R, FOXC2, TMEM161A, NFIX, SRC, DOT1L, FOXK2, FOXK1, RNF4, ACACB, ZFP36L2, TBRG4, EFNB1, HRH1, KIF3B, CHSY1, CUX1, SCAP, SH3BP4, SH2B3, WASF2, LDLR, PDLIM7, NTSR1, WFS1, DAB2IP, SORL1, SULF2, SMARCA4, EHD1, SKI, TFAP4, CA…
GO:0035023~regulation of Rho protein signal transduction	0.0127273	BCR, PLEKHG3, PREX1, MYO9B, ARHGAP35, VAV2
GO:0050773~regulation of dendrite development	0.0131444	CAMK2B, PREX1, SIPA1L1, CUX1, CARM1, DAB2IP
GO:1903507~negative regulation of nucleic acid-templated transcription	0.013164	FOXC2, KDM5C, NFIX, WFS1, ATP8B1, SRC, NOG, DOT1L, DAB2IP, EN1, FOXK1, CTCF, ARHGAP35, SMARCA4, GLI2, SKI, NCOR2, TFAP4, CUX1, BCL7A, HIVEP1, ZMYND11, ATF5
GO:0032844~regulation of homeostatic process	0.0133409	ITPKB, ANO1, CSF1R, USP7, RASA3, SRC, LCK, NAT10, CALM1, LDLR, NTSR1, SMARCA4
GO:0051960~regulation of nervous system development	0.0133986	CAMK2B, NOG, DAB2IP, CELSR1, SORL1, PTPRF, ARHGAP35, GLI2, SKI, PREX1, SIPA1L1, CUX1, BIN1, CARM1, TIMP2, PLXNB2, PLXNA1
GO:0030198~extracellular matrix organization	0.013569	FOXC2, COL13A1, ITGB4, PXDN, FSCN1, TIMP2, SERPINH1, LTBP2, HSPG2, SULF2
GO:0009891~positive regulation of biosynthetic process	0.0137102	FOXC2, CSF2, NFIX, SRC, DOT1L, FOXK2, FOXK1, CTCF, RNF4, GLI2, HRH1, ZMIZ2, TIMP2, SCAP, MYBL2, LDLR, NTSR1, WFS1, NOG, DAB2IP, EN1, SMARCA4, NCOR2, SKI, POR, TFAP4, TET3, ATF5, CALM1, SSBP3, ABCG1
GO:0043062~extracellular structure organization	0.013787	FOXC2, COL13A1, ITGB4, PXDN, FSCN1, TIMP2, SERPINH1, LTBP2, HSPG2, SULF2
GO:2000113~negative regulation of cellular macromolecule biosynthetic process	0.0137919	FOXC2, KDM5C, NFIX, SRC, DOT1L, NAT10, FOXK1, CTCF, ARHGAP35, ZFP36L2, GLI2, BCL7A, CUX1, HIVEP1, ATP8B1, WFS1, NOG, DAB2IP, EN1, SMARCA4, NCOR2, SKI, TFAP4, ZMYND11, ATF5
GO:1902532~negative regulation of intracellular signal transduction	0.013955	TMEM161A, RASA3, SRC, WFS1, DAB2IP, TIMP2, SH3BP4, CALM1, ZMYND11, SORL1, ARHGAP35, DUSP7
GO:0051726~regulation of cell cycle	0.0140974	SRC, DOT1L, DAB2IP, CABLES1, CTCF, RNF4, ZFP36L2, RHOB, SMARCA4, TBRG4, BCR, TFAP4, KIF3B, BIN1, CARM1, CTDSP2, TIMP2, MYBL2, CALM1, ATF5
GO:0009892~negative regulation of metabolic process	0.0141203	FOXC2, KDM5C, NFIX, SRC, DOT1L, NAT10, FOXK1, CTCF, RNF4, ELFN2, ACACB, SOGA1, ARHGAP35, ZFP36L2, GLI2, ZFYVE28, BCL7A, CUX1, HIVEP1, TIMP2, SERPINH1, SCAP, LDLR, ATP8B1, WFS1, NOG, DAB2IP, EN1, SORL1, SMARCA4, DUSP7, NCOR2, SKI, POR, TFAP4, CTDSP2, PKN1, ZMYND11, ATF5, CALM1, ASB1
GO:0046620~regulation of organ growth	0.0143298	FOXC2, POR, CARM1, NOG, ACACB
GO:0001775~cell activation	0.0144234	DGKD, CSF2, SRC, DGKA, MUC5B, ZFP36L2, ACTB, RHOB, GLI2, VAV2, BCR, ITPKB, PREX1, EFNB1, LCK, GNA12, TYRO3, PKN1, MAP3K14
GO:0032845~negative regulation of homeostatic process	0.0146419	ITPKB, RASA3, SRC, LCK, NAT10, CALM1, NTSR1
GO:0048518~positive regulation of biological process	0.0147709	HIP1, CSF2, CTCF, ACTB, ARHGAP35, GLI2, PREX1, ZMIZ2, TIMP2, MYBL2, TNS3, NOG, EN1, PGF, RHOB, DUSP7, VAV2, NCOR2, BCR, ITPKB, ANO1, POR, EVC, BIN1, TRAF3, LCK, NINJ1, TET3, TYRO3, FSCN1, ATF5, ABCG1, CAMK2B, CSF1R, FOXC2, TMEM161A, NFIX, SRC, DOT1L, FOXK2, FOXK1, RNF4, ACACB, ZFP36L2, TBRG4, EFNB1, HRH1, KIF3B, CHSY1, CUX1, SCAP, SH3BP4, SH2B3, WASF2, LDLR, PDLIM7, NTSR1, WFS1, DAB2IP, TRPV3, SO…
GO:0005975~carbohydrate metabolic process	0.0148117	PYGB, MCFD2, PFKFB3, SRC, MUC5B, ACACB, SOGA1, NISCH, HRH1, TET3, OGDH, XXYLT1, CALM1, TKT, ST3GAL2, NTSR1, PDK1
GO:0060349~bone morphogenesis	0.0149173	SKI, CHSY1, COL13A1, CARM1, SERPINH1
GO:0061138~morphogenesis of a branching epithelium	0.0150179	FOXC2, SRC, NOG, PLXNA1, CELSR1, PGF, GLI2
GO:0009605~response to external stimulus	0.0150662	CSF1R, CSF2, MVK, SRC, ACACB, ARHGAP35, PTPRF, GLI2, EFNB1, PREX1, HRH1, CHSY1, UCP3, PLXNA1, LDLR, SLC25A25, NTSR1, AP1M1, SUN1, FEM1A, NOG, DAB2IP, MUC5B, PGF, VAV2, BCR, ANO1, POR, TBL2, TRAF3, LCK, TYRO3, PLXNB2, CALM1, MAP3K14
GO:0031327~negative regulation of cellular biosynthetic process	0.0151918	FOXC2, KDM5C, NFIX, SRC, DOT1L, NAT10, FOXK1, CTCF, SOGA1, ARHGAP35, ZFP36L2, GLI2, BCL7A, CUX1, HIVEP1, ATP8B1, WFS1, NOG, DAB2IP, EN1, SMARCA4, NCOR2, SKI, TFAP4, ZMYND11, ATF5, ASB1
GO:1902679~negative regulation of RNA biosynthetic process	0.0153138	FOXC2, KDM5C, NFIX, WFS1, ATP8B1, SRC, NOG, DOT1L, DAB2IP, EN1, FOXK1, CTCF, ARHGAP35, SMARCA4, GLI2, SKI, NCOR2, TFAP4, CUX1, BCL7A, HIVEP1, ZMYND11, ATF5
GO:0048523~negative regulation of cellular process	0.0156987	KDM5C, CSF2, NAT10, CTCF, ELFN2, SOGA1, ARHGAP35, GLI2, ZFYVE28, BCL7A, TIMP2, NOG, RHBDF2, VSTM2L, EN1, RHOB, DUSP7, NCOR2, NISCH, BCR, ITPKB, POR, RASA3, LCK, CTDSP2, PXDN, TYRO3, ZMYND11, ATF5, ABCG1, CSF1R, FOXC2, TMEM161A, NFIX, SRC, DOT1L, FOXK1, RNF4, ACACB, ZFP36L2, TBRG4, CUX1, HIVEP1, SERPINH1, TBC1D14, SH3BP4, WASF2, TP53I11, NTSR1, WFS1, ATP8B1, DAB2IP, PYCR1, SORL1, SULF2, SMARCA4, S…
GO:0070925~organelle assembly	0.0159612	DYNC1H1, CSF2, SRC, CEP164, KIF24, WDR45, RNF4, ARHGAP35, EHD1, KIF3B, FSCN1, SDC1, TBC1D14, MYBL2, TBC1D16
GO:0019216~regulation of lipid metabolic process	0.0161126	POR, SRC, DAB2IP, SCAP, ACACB, LDLR, ABCG1, VAV2, PDK1
GO:0010558~negative regulation of macromolecule biosynthetic process	0.0165187	FOXC2, KDM5C, NFIX, SRC, DOT1L, NAT10, FOXK1, CTCF, ARHGAP35, ZFP36L2, GLI2, BCL7A, CUX1, HIVEP1, ATP8B1, WFS1, NOG, DAB2IP, EN1, SMARCA4, NCOR2, SKI, TFAP4, ZMYND11, ATF5, ASB1
GO:0008283~cell proliferation	0.0165677	CSF1R, FOXC2, PDXK, CSF2, SRC, DOT1L, ZFP36L2, TBRG4, GLI2, EFNB1, TIMP2, SH3BP4, TP53I11, TNS3, PDK1, NOG, DAB2IP, PGF, SULF2, SKI, ITPKB, POR, TFAP4, BIN1, CARM1, FSCN1, PLXNB2, PKN1, TACC2, ZMYND11, ATF5, SSBP3
GO:0006695~cholesterol biosynthetic process	0.01675	POR, MVK, SCAP, ABCG1
GO:0048013~ephrin receptor signaling pathway	0.0167705	EFNB1, SIPA1L1, SRC, ACTB, VAV2
GO:0007034~vacuolar transport	0.0167953	EHD1, AP5Z1, SRC, RAB35, TBC1D14, DENND3, SORL1, RHOB, AP1M1
GO:0030879~mammary gland development	0.0168178	NCOR2, CSF1R, SRC, FASN, ARHGAP35, GLI2
GO:0051235~maintenance of location	0.0171106	EHD1, SUN1, RASA3, LCK, CALM1, ACACB, SORL1, ABCG1, NTSR1
GO:0010605~negative regulation of macromolecule metabolic process	0.0175776	FOXC2, KDM5C, NFIX, SRC, DOT1L, NAT10, FOXK1, CTCF, RNF4, ACACB, ARHGAP35, ZFP36L2, GLI2, ZFYVE28, BCL7A, CUX1, HIVEP1, TIMP2, SERPINH1, LDLR, ATP8B1, WFS1, NOG, DAB2IP, EN1, SORL1, SMARCA4, DUSP7, NCOR2, SKI, POR, TFAP4, CTDSP2, PKN1, ZMYND11, ATF5, CALM1, ASB1
GO:1902653~secondary alcohol biosynthetic process	0.0176977	POR, MVK, SCAP, ABCG1
GO:1901615~organic hydroxy compound metabolic process	0.0179015	ITPKB, HRH1, POR, MVK, OSBPL5, SCAP, CALM1, LDLR, SORL1, ABCG1, NTSR1
GO:0001843~neural tube closure	0.0180825	SKI, NOG, PLXNB2, CELSR1, ARHGAP35
GO:0048858~cell projection morphogenesis	0.0181756	CAMK2B, CSF1R, SRC, CEP164, NOG, DAB2IP, KIF24, ARHGAP35, GLI2, EHD1, EFNB1, SIPA1L1, CUX1, CDH11, PLXNB2, PLXNA1, WASF2
GO:0006810~transport	0.0183083	GLTP, LGALS3BP, MCFD2, HIP1, CSF2, DGKD, ACTB, GOLGA3, PPP6R3, SLC26A11, RHBDF2, RAB3IL1, GRIP2, RHOB, VAV2, NCOR2, NISCH, BCR, ANO1, SLC7A5, RASA3, BIN1, LCK, RAB35, TYRO3, EXOC3, RIN3, ABCG1, CAMK2B, CSF1R, TTYH3, AP5Z1, TTYH2, SRC, LTBP2, DENND3, ACACB, SYNGR1, KIF3B, CUX1, UCP3, TBC1D14, SH3BP4, WASF2, LDLR, PDLIM7, NTSR1, SLC25A25, TBC1D16, AP1M1, UBL4A, DYNC1H1, SLC35A4, TMEM184B, OSBPL5, W…
GO:0031328~positive regulation of cellular biosynthetic process	0.0187245	FOXC2, CSF2, NFIX, SRC, DOT1L, FOXK2, FOXK1, CTCF, RNF4, GLI2, HRH1, ZMIZ2, TIMP2, SCAP, MYBL2, LDLR, NTSR1, WFS1, NOG, DAB2IP, EN1, SMARCA4, NCOR2, SKI, POR, TFAP4, TET3, ATF5, CALM1, SSBP3
GO:0060606~tube closure	0.0187617	SKI, NOG, PLXNB2, CELSR1, ARHGAP35
GO:0010675~regulation of cellular carbohydrate metabolic process	0.0188868	HRH1, SRC, ACACB, SOGA1, NTSR1, PDK1
GO:0048585~negative regulation of response to stimulus	0.0198955	TMEM161A, CSF2, MVK, SRC, ARHGAP35, ZFYVE28, TIMP2, SH3BP4, FEM1A, WFS1, NOG, DAB2IP, PYCR1, SORL1, SMARCA4, SULF2, DUSP7, NCOR2, SKI, BCR, RASA3, PXDN, TYRO3, ZMYND11, CALM1
GO:0030029~actin filament-based process	0.0199182	CSF1R, SRC, MYO9B, CORO2A, CELSR1, ARHGAP35, BCR, NISCH, PREX1, INF2, FMNL2, SIPA1L1, FSCN1, WASF2, PDLIM7
GO:0035265~organ growth	0.0199815	FOXC2, POR, EVC, CARM1, NOG, ACACB
GO:0002062~chondrocyte differentiation	0.0201673	POR, CHSY1, SERPINH1, GLI2, SULF2
GO:0044700~single organism signaling	0.020221	LGALS3BP, HIP1, CSF2, PTPRS, DGKD, ITGB4, DGKA, CELSR1, SOGA1, SIPA1L3, PTPRF, ACTB, ARHGAP35, GLI2, ZFYVE28, PREX1, SIPA1L1, TIMP2, TNS3, PDK1, PLEKHG3, NOG, RHBDF2, GRIP2, PGF, RHOB, DUSP7, VAV2, NISCH, BCR, ITPKB, ANO1, POR, EVC, RASA3, TRAF3, LCK, CTDSP2, RAB35, PXDN, TYRO3, RIN3, ZMYND11, ARL8B, CAMK2B, CSF1R, GNAZ, FOXC2, TMEM161A, SRC, DOT1L, LTBP2, RNF4, ZFP36L2, EFNB1, SYNGR1, HRH1, CHSY…
GO:0001503~ossification	0.0207796	SKI, FOXC2, SUN1, CHSY1, COL13A1, FASN, CDH11, NOG, PDLIM7, GLI2
GO:0050790~regulation of catalytic activity	0.0212266	CAMK2B, CSF1R, HIP1, CSF2, SRC, DENND3, ELFN2, ACACB, SIPA1L3, ARHGAP35, ZFYVE28, PREX1, SIPA1L1, PPP6R3, TIMP2, SERPINH1, SH3BP4, TBC1D14, TBC1D16, PLEKHG3, FEM1A, WFS1, DAB2IP, MYO9B, RAB3IL1, SORL1, VAV2, DUSP7, BCR, POR, TFAP4, RASA3, LCK, PLXNB2, RIN3, PKN1, CALM1, MAP3K14
GO:0042221~response to chemical	0.0212853	CSF2, DGKD, SOGA1, ARHGAP35, GLI2, PREX1, TIMP2, PDK1, NOG, PGF, RHOB, NCOR2, BCR, ITPKB, ANO1, POR, TRAF3, LCK, CTDSP2, RAB35, PXDN, ZNF236, ABCG1, CAMK2B, CSF1R, FOXC2, TMEM161A, SRC, LTBP2, RNF4, ACACB, ZFP36L2, EFNB1, HRH1, UCP3, GNA12, SERPINH1, SCAP, PLXNA1, SH3BP4, MBP, LDLR, NTSR1, SLC25A25, WFS1, ATP8B1, DAB2IP, PYCR1, SULF2, SMARCA4, EHD1, SKI, TFAP4, TBL2, CARM1, FASN, PLXNB2, SDC1, CA…
GO:0016311~dephosphorylation	0.0220248	PFKFB3, PTPRS, LCK, CTDSP2, PPP6R3, SYNJ2, CALM1, PTPRH, ELFN2, PTPRF, DUSP7
GO:0035148~tube formation	0.0222937	SKI, NOG, DAB2IP, PLXNB2, CELSR1, ARHGAP35
GO:0051234~establishment of localization	0.0223176	GLTP, LGALS3BP, MCFD2, HIP1, CSF2, DGKD, ACTB, GOLGA3, PPP6R3, SLC26A11, RHBDF2, RAB3IL1, GRIP2, RHOB, VAV2, NCOR2, NISCH, BCR, ANO1, SLC7A5, RASA3, BIN1, LCK, RAB35, TYRO3, EXOC3, RIN3, ABCG1, CAMK2B, CSF1R, TTYH3, AP5Z1, TTYH2, SRC, LTBP2, DENND3, ACACB, SYNGR1, KIF3B, CUX1, UCP3, TBC1D14, SH3BP4, WASF2, LDLR, PDLIM7, NTSR1, SLC25A25, TBC1D16, AP1M1, UBL4A, DYNC1H1, SLC35A4, TMEM184B, OSBPL5, W…
GO:0032990~cell part morphogenesis	0.0223239	CAMK2B, CSF1R, SRC, CEP164, NOG, DAB2IP, KIF24, ARHGAP35, GLI2, EHD1, EFNB1, SIPA1L1, CUX1, CDH11, PLXNB2, PLXNA1, WASF2
GO:0003420~regulation of growth plate cartilage chondrocyte proliferation	0.0223847	POR, CARM1
GO:0014020~primary neural tube formation	0.0223944	SKI, NOG, PLXNB2, CELSR1, ARHGAP35
GO:0007266~Rho protein signal transduction	0.0223944	GNA12, MYO9B, CELSR1, ARHGAP35, RHOB
GO:0051253~negative regulation of RNA metabolic process	0.0225513	FOXC2, KDM5C, NFIX, WFS1, ATP8B1, SRC, NOG, DOT1L, DAB2IP, EN1, FOXK1, CTCF, ARHGAP35, SMARCA4, GLI2, SKI, NCOR2, TFAP4, CUX1, BCL7A, HIVEP1, ZMYND11, ATF5
GO:0000902~cell morphogenesis	0.0225513	CAMK2B, CSF1R, SRC, CEP164, NOG, DAB2IP, KIF24, SIPA1L3, ARHGAP35, GLI2, EHD1, PREX1, EFNB1, SIPA1L1, CUX1, GNA12, CDH11, TYRO3, PLXNB2, PLXNA1, TBC1D14, WASF2, TBC1D16
GO:0051716~cellular response to stimulus	0.0226931	LGALS3BP, HIP1, CSF2, DGKD, ITGB4, DGKA, CEP164, CELSR1, SOGA1, SIPA1L3, PTPRF, ACTB, ARHGAP35, GLI2, ZFYVE28, PREX1, SIPA1L1, TIMP2, TNS3, PDK1, PLEKHG3, USP7, NOG, RHBDF2, GRIP2, PGF, RHOB, DUSP7, VAV2, NCOR2, NISCH, BCR, ITPKB, ANO1, POR, EVC, RASA3, TRAF3, LCK, CTDSP2, RAB35, PXDN, TYRO3, RIN3, ZMYND11, ZNF236, ARL8B, CAMK2B, CSF1R, GNAZ, FOXC2, TMEM161A, AP5Z1, SRC, DOT1L, LTBP2, RNF4, ZFP36…
GO:0030036~actin cytoskeleton organization	0.0228291	CSF1R, SRC, CORO2A, ARHGAP35, BCR, NISCH, PREX1, INF2, FMNL2, SIPA1L1, FSCN1, WASF2, PDLIM7
GO:0016126~sterol biosynthetic process	0.0228774	POR, MVK, SCAP, ABCG1
GO:0035383~thioester metabolic process	0.0231688	MVK, FASN, OGDH, ACACB, PDK1
GO:0006637~acyl-CoA metabolic process	0.0231688	MVK, FASN, OGDH, ACACB, PDK1
GO:0000904~cell morphogenesis involved in differentiation	0.0232388	CAMK2B, CSF1R, SRC, NOG, DAB2IP, SIPA1L3, ARHGAP35, GLI2, PREX1, EFNB1, SIPA1L1, CUX1, CDH11, TYRO3, PLXNB2, PLXNA1
GO:0016197~endosomal transport	0.0232715	EHD1, AP5Z1, RAB35, TBC1D14, DENND3, SORL1, RHOB, AP1M1
GO:0006796~phosphate-containing compound metabolic process	0.0234255	CAMK2B, CSF1R, PDXK, DGKD, PFKFB3, CSF2, PTPRS, MVK, SRC, DGKA, PTPRH, ELFN2, CAMKK1, PTPRF, ZFP36L2, TBRG4, ZFYVE28, HRH1, CUX1, PPP6R3, TIMP2, SLC25A25, NTSR1, PDK1, WFS1, NOG, DAB2IP, SYNJ2, EFR3B, SORL1, VAV2, DUSP7, BCR, ITPKB, TFAP4, RASA3, LCK, CTDSP2, CCDC88C, TYRO3, OGDH, PLXNB2, PKN1, ZMYND11, CALM1, TKT, MAP3K14
GO:0006793~phosphorus metabolic process	0.0241688	CAMK2B, CSF1R, PDXK, DGKD, PFKFB3, CSF2, PTPRS, MVK, SRC, DGKA, PTPRH, ELFN2, CAMKK1, PTPRF, ZFP36L2, TBRG4, ZFYVE28, HRH1, CUX1, PPP6R3, TIMP2, SLC25A25, NTSR1, PDK1, WFS1, NOG, DAB2IP, SYNJ2, EFR3B, SORL1, VAV2, DUSP7, BCR, ITPKB, TFAP4, RASA3, LCK, CTDSP2, CCDC88C, TYRO3, OGDH, PLXNB2, PKN1, ZMYND11, CALM1, TKT, MAP3K14
GO:0045664~regulation of neuron differentiation	0.0248615	CAMK2B, DAB2IP, PTPRF, ARHGAP35, GLI2, PREX1, SIPA1L1, CUX1, BIN1, CARM1, TIMP2, PLXNB2, PLXNA1
GO:0060548~negative regulation of cell death	0.0248683	CSF1R, FOXC2, TMEM161A, CSF2, WFS1, SRC, NOG, EN1, PYCR1, VSTM2L, SORL1, GLI2, ITPKB, POR, TYRO3, ZMYND11, ATF5, NTSR1
GO:0016310~phosphorylation	0.0249053	CAMK2B, CSF1R, PDXK, DGKD, PFKFB3, CSF2, MVK, SRC, DGKA, CAMKK1, ZFP36L2, TBRG4, ZFYVE28, CUX1, TIMP2, PDK1, NOG, DAB2IP, EFR3B, SORL1, VAV2, DUSP7, BCR, ITPKB, TFAP4, RASA3, LCK, CTDSP2, CCDC88C, TYRO3, OGDH, PLXNB2, PKN1, ZMYND11, CALM1, MAP3K14
GO:0090181~regulation of cholesterol metabolic process	0.0251116	POR, SCAP, ABCG1
GO:0048754~branching morphogenesis of an epithelial tube	0.0252366	FOXC2, SRC, NOG, CELSR1, PGF, GLI2
GO:0009952~anterior/posterior pattern specification	0.0257919	SKI, FOXC2, NOG, EN1, CELSR1, SSBP3, GLI2
GO:0038127~ERBB signaling pathway	0.0258882	ZFYVE28, HIP1, DGKD, SRC, RHBDF2, DAB2IP
GO:0006470~protein dephosphorylation	0.0261216	PTPRS, LCK, CTDSP2, PPP6R3, CALM1, PTPRH, PTPRF, DUSP7
GO:0016331~morphogenesis of embryonic epithelium	0.0265496	SKI, NOG, PLXNB2, CELSR1, ARHGAP35, GLI2
GO:0007154~cell communication	0.0266867	LGALS3BP, HIP1, CSF2, PTPRS, DGKD, ITGB4, DGKA, CELSR1, SOGA1, SIPA1L3, PTPRF, ACTB, ARHGAP35, GLI2, ZFYVE28, PREX1, SIPA1L1, TIMP2, TNS3, PDK1, PLEKHG3, NOG, RHBDF2, GRIP2, PGF, RHOB, DUSP7, VAV2, NISCH, BCR, ITPKB, ANO1, POR, EVC, RASA3, TRAF3, LCK, CTDSP2, RAB35, PXDN, TYRO3, RIN3, ZMYND11, ARL8B, CAMK2B, CSF1R, GNAZ, FOXC2, TMEM161A, SRC, DOT1L, LTBP2, RNF4, ZFP36L2, EFNB1, SYNGR1, HRH1, CHSY…
GO:0010629~negative regulation of gene expression	0.0273564	FOXC2, KDM5C, NFIX, SRC, DOT1L, FOXK1, CTCF, ACACB, ARHGAP35, ZFP36L2, GLI2, BCL7A, CUX1, HIVEP1, LDLR, ATP8B1, WFS1, NOG, DAB2IP, EN1, SMARCA4, NCOR2, SKI, TFAP4, ZMYND11, ATF5
GO:1902531~regulation of intracellular signal transduction	0.0282166	CSF1R, TMEM161A, HIP1, CSF2, SRC, DOT1L, SIPA1L3, ARHGAP35, PREX1, SIPA1L1, GNA12, TIMP2, SH3BP4, PLEKHG3, WFS1, DAB2IP, MYO9B, SORL1, RHOB, VAV2, DUSP7, BCR, ITPKB, RASA3, LCK, PKN1, ZMYND11, CALM1, MAP3K14
GO:0007423~sensory organ development	0.0286952	SKI, BCR, FOXC2, ATP8B1, NOG, NINJ1, CELSR1, SIPA1L3, SLC25A25, ARHGAP35, GLI2, SMARCA4
GO:0070887~cellular response to chemical stimulus	0.0291912	CAMK2B, CSF1R, FOXC2, TMEM161A, CSF2, SRC, LTBP2, RNF4, SOGA1, ZFP36L2, GLI2, PREX1, HRH1, UCP3, SH3BP4, LDLR, PDK1, WFS1, NOG, DAB2IP, PYCR1, PGF, RHOB, SMARCA4, SULF2, NCOR2, SKI, EHD1, ITPKB, ANO1, POR, TFAP4, TBL2, TRAF3, CARM1, FASN, CTDSP2, RAB35, PXDN, ZNF236, MAP3K14
GO:1902745~positive regulation of lamellipodium organization	0.0295678	SRC, FSCN1, WASF2
GO:0001841~neural tube formation	0.0299493	SKI, NOG, PLXNB2, CELSR1, ARHGAP35
GO:0071310~cellular response to organic substance	0.030508	CAMK2B, CSF1R, FOXC2, CSF2, SRC, LTBP2, RNF4, SOGA1, ZFP36L2, GLI2, HRH1, UCP3, SH3BP4, LDLR, WFS1, NOG, DAB2IP, PGF, SMARCA4, SULF2, NCOR2, SKI, EHD1, ANO1, POR, TFAP4, TBL2, TRAF3, CARM1, FASN, CTDSP2, RAB35, PXDN, ZNF236, MAP3K14
GO:0050896~response to stimulus	0.0309111	DGKD, CSF2, DGKA, CELSR1, SOGA1, ACTB, ARHGAP35, ZFYVE28, PREX1, TNS3, PDK1, USP7, PGF, GRIP2, BCR, NISCH, POR, RAB35, NINJ1, TYRO3, RIN3, ABCG1, ARL8B, CSF1R, GNAZ, TMEM161A, LTBP2, ACACB, ZFP36L2, EFNB1, HRH1, HIVEP1, SERPINH1, CD300LB, SCAP, PLXNA1, MBP, NTSR1, AP1M1, WFS1, ATP8B1, PYCR1, TRPV3, CORO2A, SMARCA4, EHD1, TBL2, FASN, CCDC88C, PLXNB2, SDC1, GTF2IRD1, CALM1, MAP3K14, LGALS3BP, HIP1,…
GO:0051172~negative regulation of nitrogen compound metabolic process	0.0316967	FOXC2, KDM5C, NFIX, SRC, DOT1L, NAT10, FOXK1, CTCF, ARHGAP35, ZFP36L2, GLI2, BCL7A, CUX1, HIVEP1, ATP8B1, WFS1, NOG, DAB2IP, EN1, SORL1, SMARCA4, NCOR2, SKI, TFAP4, ZMYND11, ATF5
GO:0002063~chondrocyte development	0.031905	CHSY1, SERPINH1, SULF2
GO:0048705~skeletal system morphogenesis	0.0322689	SKI, FOXC2, CHSY1, COL13A1, CARM1, NOG, SERPINH1
GO:0010941~regulation of cell death	0.0323575	CSF1R, FOXC2, TMEM161A, HIP1, CSF2, SRC, GLI2, NTSR1, WFS1, NOG, DAB2IP, PYCR1, EN1, VSTM2L, SORL1, RHOB, VAV2, ITPKB, POR, TFAP4, BIN1, TRAF3, LCK, TYRO3, ZMYND11, ATF5
GO:0015914~phospholipid transport	0.0326948	OSBPL5, ATP8B1, LDLR, ABCG1
GO:0031960~response to corticosteroid	0.0330179	TFAP4, SRC, UCP3, SDC1, CALM1, ZFP36L2
GO:0032501~multicellular organismal process	0.0334254	CSF2, DGKD, ITGB4, DGKA, CELSR1, SIPA1L3, PTPRF, ACTB, ARHGAP35, GLI2, PREX1, GOLGA3, NUDCD3, SIPA1L1, TIMP2, TNS3, SUN1, USP7, NOG, EN1, HSPG2, GRIP2, PGF, RHOB, VAV2, NCOR2, NISCH, BCR, ITPKB, ANO1, SLC7A5, POR, EVC, BIN1, TRAF3, LCK, RAB35, NINJ1, TET3, CDH11, TYRO3, ANGPTL2, KIFC3, ATF5, ABCG1, CAMK2B, CSF1R, FOXC2, PFKFB3, COL13A1, SRC, FOXK1, ACACB, EVPL, ZFP36L2, CAMSAP1, EFNB1, HRH1, KIF3…
GO:0033993~response to lipid	0.0336408	TMEM161A, CSF2, SRC, DAB2IP, RNF4, ZFP36L2, SMARCA4, BCR, NCOR2, TFAP4, CARM1, UCP3, SDC1, CALM1, LDLR, ABCG1, NTSR1
GO:0001933~negative regulation of protein phosphorylation	0.0339209	ZFYVE28, TFAP4, CTDSP2, NOG, DAB2IP, PKN1, CALM1, ZMYND11, SORL1, DUSP7
GO:0002009~morphogenesis of an epithelium	0.033986	SKI, CSF1R, FOXC2, SRC, NOG, PLXNA1, PLXNB2, CELSR1, PGF, ARHGAP35, GLI2, RHOB
GO:0032456~endocytic recycling	0.0343125	EHD1, RAB35, SORL1
GO:0045880~positive regulation of smoothened signaling pathway	0.0343125	POR, EVC, CHSY1
GO:0003018~vascular process in circulatory system	0.034545	BCR, FOXC2, HRH1, SRC, GRIP2, ARHGAP35
GO:0045934~negative regulation of nucleobase-containing compound metabolic process	0.0349313	FOXC2, KDM5C, NFIX, WFS1, ATP8B1, SRC, NOG, DOT1L, DAB2IP, EN1, NAT10, FOXK1, CTCF, ARHGAP35, SMARCA4, GLI2, SKI, NCOR2, TFAP4, CUX1, BCL7A, HIVEP1, ZMYND11, ATF5
GO:0061035~regulation of cartilage development	0.0354411	POR, CARM1, NOG, GLI2
GO:0050789~regulation of biological process	0.0364444	DGKD, CSF2, DGKA, CELSR1, SOGA1, ACTB, ARHGAP35, ZFYVE28, PREX1, ZMIZ2, TNS3, PDK1, USP7, PGF, GRIP2, BCR, NISCH, POR, BIN1, RAB35, NINJ1, TYRO3, FSCN1, RIN3, ATF5, ABCG1, ARL8B, ZNF276, CSF1R, GNAZ, TMEM161A, LTBP2, ACACB, ZFP36L2, CAMSAP1, EFNB1, SYNGR1, HRH1, KIF3B, HIVEP1, SERPINH1, CD300LB, SCAP, TBC1D14, PLXNA1, NTSR1, TBC1D16, AP1M1, WFS1, ATP8B1, PYCR1, TRPV3, CORO2A, SMARCA4, EHD1, TBL2,…
GO:1905114~cell surface receptor signaling pathway involved in cell-cell signaling	0.036453	SKI, SRC, CCDC88C, NOG, DAB2IP, SDC1, CALM1, CELSR1, NTSR1, GLI2, SMARCA4, SULF2
GO:0021955~central nervous system neuron axonogenesis	0.0367883	CDH11, ARHGAP35, GLI2
GO:0008589~regulation of smoothened signaling pathway	0.0368575	POR, EVC, CHSY1, GLI2
GO:0008202~steroid metabolic process	0.0369796	POR, MVK, OSBPL5, ATP8B1, SCAP, LDLR, SORL1, ABCG1
GO:1901617~organic hydroxy compound biosynthetic process	0.0377348	HRH1, POR, MVK, SCAP, ABCG1, NTSR1
GO:0006024~glycosaminoglycan biosynthetic process	0.0377879	CHSY1, SDC3, SDC1, HSPG2, ST3GAL2
GO:0009968~negative regulation of signal transduction	0.0381012	TMEM161A, CSF2, WFS1, SRC, NOG, DAB2IP, SORL1, ARHGAP35, SMARCA4, SULF2, DUSP7, SKI, ZFYVE28, RASA3, PXDN, TYRO3, TIMP2, SH3BP4, CALM1, ZMYND11
GO:0006996~organelle organization	0.0383391	MCFD2, KDM5C, HIP1, CSF2, ALAS1, CEP164, NAT10, CTCF, WDR45, CELSR1, SIPA1L3, ACTB, ARHGAP35, PREX1, SIPA1L1, PPP6R3, MYBL2, SUN1, USP7, KIF24, NISCH, BCR, INF2, BIN1, TET3, FSCN1, KIFC3, ZMYND11, ATF5, CSF1R, SRC, DOT1L, RNF4, CAMSAP1, CHRAC1, KIF3B, TBC1D14, WASF2, PDLIM7, TBC1D16, AP1M1, UBL4A, DYNC1H1, ATP8B1, CORO2A, SMARCA4, EHD1, SKI, FMNL2, CARM1, PLEKHM2, SDC1, PKN1, TACC2
GO:0010769~regulation of cell morphogenesis involved in differentiation	0.0388291	CAMK2B, PREX1, SIPA1L1, CUX1, NOG, DAB2IP, PLXNA1, PLXNB2, ARHGAP35
GO:0006023~aminoglycan biosynthetic process	0.0388429	CHSY1, SDC3, SDC1, HSPG2, ST3GAL2
GO:0002694~regulation of leukocyte activation	0.0393676	BCR, ITPKB, EFNB1, SRC, LCK, TYRO3, PKN1, MUC5B, MAP3K14, ZFP36L2, GLI2
GO:0010876~lipid localization	0.0400552	EHD1, GLTP, OSBPL5, ATP8B1, ACACB, LDLR, SORL1, ABCG1, NTSR1
GO:0007411~axon guidance	0.040634	EFNB1, CSF1R, NOG, PLXNA1, PLXNB2, ARHGAP35, GLI2
GO:0022612~gland morphogenesis	0.0410031	CSF1R, SRC, NOG, PLXNA1, GLI2
GO:0097485~neuron projection guidance	0.0410909	EFNB1, CSF1R, NOG, PLXNA1, PLXNB2, ARHGAP35, GLI2
GO:0043647~inositol phosphate metabolic process	0.0412786	ITPKB, HRH1, CALM1, NTSR1
GO:0072001~renal system development	0.0413847	FOXC2, WFS1, ITGB4, NOG, SDC1, PGF, GLI2, SULF2
GO:0032989~cellular component morphogenesis	0.0414467	CAMK2B, CSF1R, SRC, CEP164, NOG, DAB2IP, KIF24, SIPA1L3, ARHGAP35, GLI2, EHD1, PREX1, EFNB1, SIPA1L1, CUX1, GNA12, CDH11, TYRO3, PLXNB2, PLXNA1, TBC1D14, WASF2, TBC1D16
GO:0044092~negative regulation of molecular function	0.0414857	USP7, WFS1, SRC, NOG, DAB2IP, ELFN2, ACACB, SORL1, PTPRF, DUSP7, ZFYVE28, POR, TFAP4, TRAF3, CARM1, TIMP2, SERPINH1, SH3BP4, PKN1, CALM1
GO:0009719~response to endogenous stimulus	0.0419356	FOXC2, SRC, LTBP2, RNF4, SOGA1, ZFP36L2, HRH1, UCP3, TIMP2, SCAP, SH3BP4, NOG, DAB2IP, PGF, SMARCA4, SULF2, NCOR2, SKI, EHD1, POR, TFAP4, CARM1, RAB35, SDC1, CALM1, ABCG1
GO:0006084~acetyl-CoA metabolic process	0.0419379	MVK, FASN, ACACB
GO:0042981~regulation of apoptotic process	0.0426862	CSF1R, FOXC2, TMEM161A, HIP1, CSF2, WFS1, SRC, NOG, DAB2IP, EN1, VSTM2L, RHOB, GLI2, VAV2, ITPKB, POR, TFAP4, BIN1, TRAF3, LCK, TYRO3, ZMYND11, ATF5, NTSR1
GO:0048736~appendage development	0.0429774	SKI, ITGB4, GNA12, NOG, EN1, GLI2
GO:0060173~limb development	0.0429774	SKI, ITGB4, GNA12, NOG, EN1, GLI2
GO:0043066~negative regulation of apoptotic process	0.0433506	CSF1R, FOXC2, TMEM161A, CSF2, WFS1, SRC, NOG, EN1, VSTM2L, GLI2, ITPKB, POR, TYRO3, ZMYND11, ATF5, NTSR1
GO:0000122~negative regulation of transcription from RNA polymerase II promoter	0.0434428	FOXC2, NFIX, WFS1, NOG, DAB2IP, EN1, CTCF, ARHGAP35, SMARCA4, GLI2, SKI, NCOR2, CUX1, HIVEP1, ZMYND11
GO:0048812~neuron projection morphogenesis	0.0436433	CAMK2B, EFNB1, CSF1R, SIPA1L1, CUX1, CDH11, NOG, DAB2IP, PLXNA1, PLXNB2, ARHGAP35, GLI2
GO:2001137~positive regulation of endocytic recycling	0.0442709	EHD1, SORL1
GO:0010975~regulation of neuron projection development	0.0443359	CAMK2B, PREX1, SIPA1L1, CUX1, CARM1, DAB2IP, PLXNA1, PLXNB2, PTPRF, ARHGAP35
GO:0046777~protein autophosphorylation	0.0444337	CAMK2B, BCR, CSF1R, SRC, LCK, TYRO3, CALM1
GO:0060603~mammary gland duct morphogenesis	0.044608	CSF1R, SRC, GLI2
GO:0006109~regulation of carbohydrate metabolic process	0.0457291	HRH1, SRC, ACACB, SOGA1, NTSR1, PDK1
GO:0021953~central nervous system neuron differentiation	0.0457291	CSF1R, CDH11, OGDH, ATF5, ARHGAP35, GLI2
GO:0045944~positive regulation of transcription from RNA polymerase II promoter	0.0461566	FOXC2, NFIX, NOG, DOT1L, DAB2IP, EN1, FOXK2, CTCF, RNF4, SMARCA4, GLI2, SKI, TFAP4, ZMIZ2, TET3, SCAP, MYBL2, ATF5, SSBP3
GO:0043067~regulation of programmed cell death	0.0465494	CSF1R, FOXC2, TMEM161A, HIP1, CSF2, WFS1, SRC, NOG, DAB2IP, EN1, VSTM2L, RHOB, GLI2, VAV2, ITPKB, POR, TFAP4, BIN1, TRAF3, LCK, TYRO3, ZMYND11, ATF5, NTSR1
GO:0007173~epidermal growth factor receptor signaling pathway	0.0466969	ZFYVE28, HIP1, DGKD, SRC, DAB2IP
GO:0097581~lamellipodium organization	0.047569	SRC, FSCN1, WASF2, VAV2
GO:0043069~negative regulation of programmed cell death	0.0477074	CSF1R, FOXC2, TMEM161A, CSF2, WFS1, SRC, NOG, EN1, VSTM2L, GLI2, ITPKB, POR, TYRO3, ZMYND11, ATF5, NTSR1
GO:0030031~cell projection assembly	0.0478711	EHD1, ATP8B1, CEP164, FSCN1, KIF24, TBC1D14, WASF2, ARHGAP35, VAV2, TBC1D16
GO:0048729~tissue morphogenesis	0.0490118	CSF1R, FOXC2, ITGB4, SRC, NOG, CELSR1, PGF, ARHGAP35, RHOB, GLI2, SKI, PLXNB2, PLXNA1
GO:0051248~negative regulation of protein metabolic process	0.0490605	SRC, NOG, DAB2IP, RNF4, SORL1, ZFP36L2, DUSP7, SKI, ZFYVE28, NCOR2, POR, TFAP4, CTDSP2, TIMP2, SERPINH1, PKN1, CALM1, ZMYND11, ASB1
GO:0044283~small molecule biosynthetic process	0.0497385	HRH1, POR, MVK, FASN, PYCR1, SCAP, TKT, ACACB, SOGA1, ABCG1, NTSR1

## Sheet: Expression in Met_PCa
	Expression in metastatic tumors relative to normal tissues. Dataset GDS2545
	Significantly downregulated
	Significantly upregulated
	Not significant
	Not detected
	GO:0032502~developmental process
	ACACB
	ACTB
	ANGPTL2
	ASB1
	ATP8B1
	BIN1
	CALM1
	CDH11
	CELSR1
	COL13A1
	CSF1R
	CUX1
	HSPG2
	ITGB4
	ITPKB
	LCK
	NCOR2
	NINJ1
	PDLIM7
	RHOB
	SIPA1L1
	SORL1
	TACC2
	WASF2
	ZFP36L2
	CEP164
	GNA12
	MBP
	ATF5
	CARM1
	DGKD
	EFNB1
	EVPL
	FASN
	FOXC2
	FSCN1
	KIF3B
	PKN1
	PTPRF
	RAB35
	SDC1
	SIPA1L3
	SLC7A5
	SMARCA4
	TET3
	TYRO3
	USP7
	WFS1
	CSF2
	ARHGAP35
	BCR
	CAMK2B
	CAMSAP1
	CHSY1
	EHD1
	GLI2
	HIVEP1
	NUDCD3
	OGDH
	PFKFB3
	PGF
	PLXNB2
	POR
	SCAP
	SERPINH1
	SH2B3
	SKI
	SRC
	TIMP2
	UCP3
	VAV2
	ANO1
	AP1M1
	DAB2IP
	EN1
	EVC
	FMNL2
	FOXK1
	GTF2IRD1
	INF2
	KIF24
	NOG
	PLXNA1
	PREX1
	SLC25A25
	SSBP3
	SULF2
	TBC1D14
	TBC1D16
	TNS3
