# Supplementary material for: BAZ2A-RNA mediated association with TOP2A and KDM1A represses genes implicated in prostate cancer
Source: Life Sci Alliance. 2023 Apr 25;6(7):e202301950. doi: 10.26508/lsa.202301950 (PMC10130768; doi:10.26508/lsa.202301950)
Supplement: Supplementary file 9 [file LSA-2023-01950_TableS4.xlsx]

## Sheet: Common for 3 replicates
1	AHCTF1
2	AHNAK
3	AIFM1
4	AP2A2
5	AQR
6	BAZ1B
7	CCT2
8	CCT3
9	CHD4
10	CSNK2A2
11	CSTF3
12	CTNNBL1
13	DDX27
14	DDX42
15	DDX46
16	DGAT1
17	DYNC1H1
18	EFTUD2
19	EIF3C
20	EIF3D
21	EIF4G1
22	EXOSC10
23	FLNA
24	FLNB
25	FTSJ3
26	HCFC1
27	HK2
28	IFIT1
29	IMMT
30	INTS3
31	IQGAP1
32	ITPR3
33	KARS
34	KDM1A
35	LMNB1
36	MECP2
37	MTA2
38	MX1
39	MYO1B
40	NCBP1
41	NCOA5
42	NES
43	NUP107
44	NUP133
45	NUP98
46	NXF1
47	PDS5A
48	PNPLA6
49	PPAN
50	PRPF4
51	PSMD2
52	RAD21
53	RANBP2
54	RAVER1
55	RBBP7
56	RBM15
57	RBM28
58	RPRD1B
59	SAMD9
60	SEC24C
61	SF3B2
62	SMARCA4
63	SMC1A
64	SMCHD1
65	SPTAN1
66	SPTBN1
57	SQOR
68	SRP68
69	SRRT
70	STAG2
71	STAT1
72	TCP1
73	TEX10
74	THOC2
75	TMPO
76	TMTC3
77	TOP2A
78	TOP2B
79	TRIM25
80	XPO1
81	ZFR
82	ZNF185

## Sheet: IP_MS
		Replicate 1_Peptide counts			Replicate 2_Peptide counts			Replicate 3_Peptide counts			Average_Peptide counts			BAZ2A_WT/Control	BAZ2A-bound with reduced association with BAZ2A_WY
	Name	Control	BAZ2A_WT	BAZ2A_WY	Control	BAZ2A_WT	BAZ2A_WY	Control	BAZ2A_WT	BAZ2A_WY	Control	BAZ2A_WT	BAZ2A_WY	> 2 FC in all replicates
ATP-binding cassette sub-family D member 1 OS=Homo sapiens OX=9606 GN=ABCD1 PE=1 SV=2	ABCD1	0	3	0	0	10	0	0	2	3	0	5	1	yes
Apoptotic chromatin condensation inducer in the nucleus OS=Homo sapiens OX=9606 GN=ACIN1 PE=1 SV=2	ACIN1	2	8	4.125	0	11	2.125	0	15	15	0.666667	11.3333	7.08333	yes
Acyl-coenzyme A thioesterase 9, mitochondrial OS=Homo sapiens OX=9606 GN=ACOT9 PE=1 SV=2	ACOT9	0	9	4.125	0	6	0	0	7	6	0	7.33333	3.375	yes
Double-stranded RNA-specific adenosine deaminase OS=Homo sapiens OX=9606 GN=ADAR PE=1 SV=4	ADAR	0	21	6.875	1	36	44.625	4	31	35	1.66667	29.3333	28.8333	yes
Acylglycerol kinase, mitochondrial OS=Homo sapiens OX=9606 GN=AGK PE=1 SV=2	AGK	0	3	0	0	4	0	0	2	4	0	3	1.33333	yes
Agrin OS=Homo sapiens OX=9606 GN=AGRN PE=1 SV=5	AGRN	0	8	0	0	5	0	0	4	4	0	5.66667	1.33333	yes
AP-2 complex subunit alpha-1 OS=Homo sapiens OX=9606 GN=AP2A1 PE=1 SV=3	AP2A1	0	9	0	1	18	14.875	0	19	20	0.333333	15.3333	11.625	yes
AP-2 complex subunit beta OS=Homo sapiens OX=9606 GN=AP2B1 PE=1 SV=1	AP2B1	0	9	5.5	0	12	12.75	0	17	11	0	12.6667	9.75	yes
AP-2 complex subunit mu OS=Homo sapiens OX=9606 GN=AP2M1 PE=1 SV=2	AP2M1	0	4	0	1	12	8.5	0	7	6	0.333333	7.66667	4.83333	yes
AP-2 complex subunit sigma OS=Homo sapiens OX=9606 GN=AP2S1 PE=1 SV=2	AP2S1	0	2	0	0	2	0	0	3	3	0	2.33333	1	yes
Apoptosis inhibitor 5 OS=Homo sapiens OX=9606 GN=API5 PE=1 SV=3	API5	0	4	0	0	10	4.25	0	6	8	0	6.66667	4.08333	yes
DNA dC->dU-editing enzyme APOBEC-3C OS=Homo sapiens OX=9606 GN=APOBEC3C PE=1 SV=2	APOBEC3C	0	2	0	0	2	0	0	2	3	0	2	1	yes
ATPase family AAA domain-containing protein 3A OS=Homo sapiens OX=9606 GN=ATAD3A PE=1 SV=2	ATAD3A	0	10	6.875	0	20	8.5	0	15	15	0	15	10.125	yes
ATPase family AAA domain-containing protein 3B OS=Homo sapiens OX=9606 GN=ATAD3B PE=1 SV=1	ATAD3B	0	10	0	0	12	0	0	13	13	0	11.6667	4.33333	yes
Sodium/potassium-transporting ATPase subunit alpha-1 OS=Homo sapiens OX=9606 GN=ATP1A1 PE=1 SV=1	ATP1A1	0	7	0	0	3	2.125	0	3	0	0	4.33333	0.708333	yes
ATP synthase subunit beta, mitochondrial OS=Homo sapiens OX=9606 GN=ATP5F1B PE=1 SV=3	ATP5F1B	3	15	16.5	0	3	0	0	2	0	1	6.66667	5.5	yes
Bromodomain adjacent to zinc finger domain protein 1A OS=Homo sapiens OX=9606 GN=BAZ1A PE=1 SV=2	BAZ1A	0	2	0	0	12	8.5	0	16	18	0	10	8.83333	yes
Bromodomain adjacent to zinc finger domain protein 2A OS=Homo sapiens OX=9606 GN=BAZ2A PE=1 SV=4	BAZ2A	0	11	11	0	17	17	0	14	14	0	14	14	yes
Ribosome biogenesis protein BRX1 homolog OS=Homo sapiens OX=9606 GN=BRIX1 PE=1 SV=2	BRIX1	0	5	2.75	0	7	6.375	0	7	7	0	6.33333	5.375	yes
Chromobox protein homolog 3 OS=Homo sapiens OX=9606 GN=CBX3 PE=1 SV=4	CBX3	0	5	0	0	4	0	0	5	4	0	4.66667	1.33333	yes
Cell division cycle and apoptosis regulator protein 1 OS=Homo sapiens OX=9606 GN=CCAR1 PE=1 SV=2	CCAR1	0	2	0	0	11	10.625	0	9	10	0	7.33333	6.875	yes
Coiled-coil domain-containing protein 47 OS=Homo sapiens OX=9606 GN=CCDC47 PE=1 SV=1	CCDC47	0	5	0	0	8	2.125	0	4	7	0	5.66667	3.04167	yes
T-complex protein 1 subunit zeta OS=Homo sapiens OX=9606 GN=CCT6A PE=1 SV=3	CCT6A	0	6	0	0	8	4.25	0	2	3	0	5.33333	2.41667	yes
Cell division cycle 5-like protein OS=Homo sapiens OX=9606 GN=CDC5L PE=1 SV=2	CDC5L	0	5	0	2	19	12.75	0	19	24	0.666667	14.3333	12.25	yes
Cytoskeleton-associated protein 4 OS=Homo sapiens OX=9606 GN=CKAP4 PE=1 SV=2	CKAP4	0	2	0	0	14	12.75	0	7	7	0	7.66667	6.58333	yes
Clathrin heavy chain 1 OS=Homo sapiens OX=9606 GN=CLTC PE=1 SV=5	CLTC	2	23	13.75	5	53	55.25	0	45	52	2.33333	40.3333	40.3333	yes
N-acylneuraminate cytidylyltransferase OS=Homo sapiens OX=9606 GN=CMAS PE=1 SV=2	CMAS	0	3	0	0	7	8.5	0	8	7	0	6	5.16667	yes
Procollagen galactosyltransferase 1 OS=Homo sapiens OX=9606 GN=COLGALT1 PE=1 SV=1	COLGALT1	0	6	0	0	9	2.125	0	5	6	0	6.66667	2.70833	yes
Coronin-1C OS=Homo sapiens OX=9606 GN=CORO1C PE=1 SV=1	CORO1C	0	2	0	1	4	2.125	0	4	0	0.333333	3.33333	0.708333	yes
Casein kinase II subunit alpha OS=Homo sapiens OX=9606 GN=CSNK2A1 PE=1 SV=1	CSNK2A1	0	5	0	0	7	8.5	0	11	8	0	7.66667	5.5	yes
Casein kinase II subunit beta OS=Homo sapiens OX=9606 GN=CSNK2B PE=1 SV=1	CSNK2B	0	2	0	0	2	2.125	0	2	0	0	2	0.708333	yes
Cullin-4B OS=Homo sapiens OX=9606 GN=CUL4B PE=1 SV=4	CUL4B	0	2	0	0	6	0	0	6	6	0	4.66667	2	yes
Pre-mRNA-splicing factor CWC22 homolog OS=Homo sapiens OX=9606 GN=CWC22 PE=1 SV=3	CWC22	0	3	0	1	2	2.125	0	5	3	0.333333	3.33333	1.70833	yes
NADH-cytochrome b5 reductase 3 OS=Homo sapiens OX=9606 GN=CYB5R3 PE=1 SV=3	CYB5R3	0	10	11	0	5	2.125	0	2	3	0	5.66667	5.375	yes
Cytochrome c1, heme protein, mitochondrial OS=Homo sapiens OX=9606 GN=CYC1 PE=1 SV=3	CYC1	3	8	4.125	2	6	4.25	0	7	6	1.66667	7	4.79167	yes
Dolichyl-diphosphooligosaccharide--protein glycosyltransferase 48 kDa subunit OS=Homo sapiens OX=9606 GN=DDOST PE=1 SV=4	DDOST	2	10	8.25	2	10	12.75	0	11	11	1.33333	10.3333	10.6667	yes
ATP-dependent RNA helicase DDX1 OS=Homo sapiens OX=9606 GN=DDX1 PE=1 SV=2	DDX1	0	5	4.125	0	12	12.75	0	13	7	0	10	7.95833	yes
Probable ATP-dependent RNA helicase DDX17 OS=Homo sapiens OX=9606 GN=DDX17 PE=1 SV=2	DDX17	5	19	12.375	2	20	27.625	5	19	22	4	19.3333	20.6667	yes
ATP-dependent RNA helicase DDX18 OS=Homo sapiens OX=9606 GN=DDX18 PE=1 SV=2	DDX18	0	6	0	0	6	0	0	15	14	0	9	4.66667	yes
Nucleolar RNA helicase 2 OS=Homo sapiens OX=9606 GN=DDX21 PE=1 SV=5	DDX21	3	21	24.75	6	30	29.75	0	26	28	3	25.6667	27.5	yes
ATP-dependent RNA helicase DDX39A OS=Homo sapiens OX=9606 GN=DDX39A PE=1 SV=2	DDX39A	0	9	6.875	2	16	10.625	0	14	18	0.666667	13	11.8333	yes
Spliceosome RNA helicase DDX39B OS=Homo sapiens OX=9606 GN=DDX39B PE=1 SV=1	DDX39B	0	9	8.25	3	16	10.625	0	16	20	1	13.6667	12.9583	yes
ATP-dependent RNA helicase DDX3X OS=Homo sapiens OX=9606 GN=DDX3X PE=1 SV=3	DDX3X	0	16	9.625	0	16	21.25	3	17	15	1	16.3333	15.2917	yes
Probable ATP-dependent RNA helicase DDX5 OS=Homo sapiens OX=9606 GN=DDX5 PE=1 SV=1	DDX5	8	19	19.25	8	24	38.25	12	25	31	9.33333	22.6667	29.5	yes
ATP-dependent RNA helicase DDX50 OS=Homo sapiens OX=9606 GN=DDX50 PE=1 SV=1	DDX50	0	10	6.875	2	12	8.5	0	12	13	0.666667	11.3333	9.45833	yes
Probable ATP-dependent RNA helicase DDX6 OS=Homo sapiens OX=9606 GN=DDX6 PE=1 SV=2	DDX6	0	3	0	0	3	2.125	0	9	6	0	5	2.70833	yes
Protein DEK OS=Homo sapiens OX=9606 GN=DEK PE=1 SV=1	DEK	0	3	0	0	7	2.125	3	7	6	1	5.66667	2.70833	yes
Pre-mRNA-splicing factor ATP-dependent RNA helicase DHX15 OS=Homo sapiens OX=9606 GN=DHX15 PE=1 SV=2	DHX15	4	11	4.125	0	18	19.125	0	17	18	1.33333	15.3333	13.75	yes
Putative ATP-dependent RNA helicase DHX30 OS=Homo sapiens OX=9606 GN=DHX30 PE=1 SV=1	DHX30	0	4	0	0	6	0	0	12	11	0	7.33333	3.66667	yes
ATP-dependent RNA helicase A OS=Homo sapiens OX=9606 GN=DHX9 PE=1 SV=4	DHX9	6	23	22	3	41	48.875	11	32	36	6.66667	32	35.625	yes
Probable dimethyladenosine transferase OS=Homo sapiens OX=9606 GN=DIMT1 PE=1 SV=1	DIMT1	0	3	0	0	5	0	0	6	6	0	4.66667	2	yes
H/ACA ribonucleoprotein complex subunit 4 OS=Homo sapiens OX=9606 GN=DKC1 PE=1 SV=3	DKC1	0	6	5.5	2	16	19.125	2	11	15	1.33333	11	13.2083	yes
DnaJ homolog subfamily C member 11 OS=Homo sapiens OX=9606 GN=DNAJC11 PE=1 SV=2	DNAJC11	0	3	0	0	10	6.375	0	7	11	0	6.66667	5.79167	yes
Elongation factor 1-gamma OS=Homo sapiens OX=9606 GN=EEF1G PE=1 SV=3	EEF1G	5	10	8.25	1	8	12.75	0	6	7	2	8	9.33333	yes
Interferon-induced, double-stranded RNA-activated protein kinase OS=Homo sapiens OX=9606 GN=EIF2AK2 PE=1 SV=2	EIF2AK2	0	5	4.125	0	11	4.25	0	9	10	0	8.33333	6.125	yes
Eukaryotic translation initiation factor 2 subunit 1 OS=Homo sapiens OX=9606 GN=EIF2S1 PE=1 SV=3	EIF2S1	0	4	0	1	12	8.5	2	14	20	1	10	9.5	yes
Eukaryotic translation initiation factor 2 subunit 2 OS=Homo sapiens OX=9606 GN=EIF2S2 PE=1 SV=2	EIF2S2	0	7	4.125	0	10	8.5	0	9	10	0	8.66667	7.54167	yes
Eukaryotic translation initiation factor 3 subunit A OS=Homo sapiens OX=9606 GN=EIF3A PE=1 SV=1	EIF3A	0	10	2.75	0	12	10.625	0	22	24	0	14.6667	12.4583	yes
Eukaryotic translation initiation factor 3 subunit B OS=Homo sapiens OX=9606 GN=EIF3B PE=1 SV=3	EIF3B	0	4	0	0	7	6.375	0	8	4	0	6.33333	3.45833	yes
Eukaryotic translation initiation factor 3 subunit E OS=Homo sapiens OX=9606 GN=EIF3E PE=1 SV=1	EIF3E	0	8	0	0	8	4.25	0	13	11	0	9.66667	5.08333	yes
Eukaryotic translation initiation factor 3 subunit F OS=Homo sapiens OX=9606 GN=EIF3F PE=1 SV=1	EIF3F	0	4	2.75	0	6	8.5	0	7	6	0	5.66667	5.75	yes
Eukaryotic translation initiation factor 3 subunit I OS=Homo sapiens OX=9606 GN=EIF3I PE=1 SV=1	EIF3I	2	4	0	0	4	4.25	0	6	6	0.666667	4.66667	3.41667	yes
Eukaryotic translation initiation factor 3 subunit L OS=Homo sapiens OX=9606 GN=EIF3L PE=1 SV=1	EIF3L	0	6	4.125	0	9	2.125	0	14	14	0	9.66667	6.75	yes
Eukaryotic initiation factor 4A-I OS=Homo sapiens OX=9606 GN=EIF4A1 PE=1 SV=1	EIF4A1	0	9	6.875	0	7	4.25	0	14	13	0	10	8.04167	yes
Eukaryotic initiation factor 4A-III OS=Homo sapiens OX=9606 GN=EIF4A3 PE=1 SV=4	EIF4A3	0	11	5.5	2	13	17	2	13	15	1.33333	12.3333	12.5	yes
ER membrane protein complex subunit 1 OS=Homo sapiens OX=9606 GN=EMC1 PE=1 SV=1	EMC1	0	8	2.75	0	15	0	0	13	15	0	12	5.91667	yes
Emerin OS=Homo sapiens OX=9606 GN=EMD PE=1 SV=1	EMD	0	7	5.5	1	8	4.25	0	4	4	0.333333	6.33333	4.58333	yes
Alpha-enolase OS=Homo sapiens OX=9606 GN=ENO1 PE=1 SV=2	ENO1	0	5	5.5	1	7	4.25	0	6	0	0.333333	6	3.25	yes
Ephrin type-A receptor 2 OS=Homo sapiens OX=9606 GN=EPHA2 PE=1 SV=2	EPHA2	0	8	0	0	13	2.125	0	3	8	0	8	3.375	yes
Bifunctional glutamate/proline--tRNA ligase OS=Homo sapiens OX=9606 GN=EPRS PE=1 SV=5	EPRS	0	3	0	0	6	0	0	9	8	0	6	2.66667	yes
Phenylalanine--tRNA ligase beta subunit OS=Homo sapiens OX=9606 GN=FARSB PE=1 SV=3	FARSB	0	4	0	1	4	2.125	0	6	11	0.333333	4.66667	4.375	yes
rRNA 2'-O-methyltransferase fibrillarin OS=Homo sapiens OX=9606 GN=FBL PE=1 SV=2	FBL	0	8	6.875	1	10	8.5	3	10	11	1.33333	9.33333	8.79167	yes
Far upstream element-binding protein 3 OS=Homo sapiens OX=9606 GN=FUBP3 PE=1 SV=2	FUBP3	0	2	0	0	13	4.25	0	5	7	0	6.66667	3.75	yes
Fragile X mental retardation syndrome-related protein 1 OS=Homo sapiens OX=9606 GN=FXR1 PE=1 SV=3	FXR1	0	7	0	1	14	10.625	0	12	15	0.333333	11	8.54167	yes
Putative oxidoreductase GLYR1 OS=Homo sapiens OX=9606 GN=GLYR1 PE=1 SV=3	GLYR1	0	4	0	0	5	0	0	8	8	0	5.66667	2.66667	yes
Guanine nucleotide-binding protein G(i) subunit alpha-2 OS=Homo sapiens OX=9606 GN=GNAI2 PE=1 SV=3	GNAI2	0	7	4.125	0	6	4.25	0	9	8	0	7.33333	5.45833	yes
Guanine nucleotide-binding protein G(s) subunit alpha isoforms XLas OS=Homo sapiens OX=9606 GN=GNAS PE=1 SV=2	GNAS	0	3	0	1	6	4.25	0	9	10	0.333333	6	4.75	yes
Guanine nucleotide-binding protein-like 3 OS=Homo sapiens OX=9606 GN=GNL3 PE=1 SV=2	GNL3	0	5	0	0	7	0	0	8	7	0	6.66667	2.33333	yes
Nucleolar GTP-binding protein 1 OS=Homo sapiens OX=9606 GN=GTPBP4 PE=1 SV=3	GTPBP4	0	2	0	0	5	0	0	10	13	0	5.66667	4.33333	yes
Core histone macro-H2A.2 OS=Homo sapiens OX=9606 GN=H2AFY2 PE=1 SV=3	H2AFY2	0	3	5.5	2	8	6.375	0	5	4	0.666667	5.33333	5.29167	yes
Very-long-chain (3R)-3-hydroxyacyl-CoA dehydratase 3 OS=Homo sapiens OX=9606 GN=HACD3 PE=1 SV=2	HACD3	0	5	6.875	0	6	4.25	0	4	4	0	5	5.04167	yes
Trifunctional enzyme subunit alpha, mitochondrial OS=Homo sapiens OX=9606 GN=HADHA PE=1 SV=2	HADHA	0	17	17.875	0	14	0	0	2	0	0	11	5.95833	yes
Trifunctional enzyme subunit beta, mitochondrial OS=Homo sapiens OX=9606 GN=HADHB PE=1 SV=3	HADHB	0	13	6.875	0	5	8.5	0	2	0	0	6.66667	5.125	yes
Histone deacetylase 1 OS=Homo sapiens OX=9606 GN=HDAC1 PE=1 SV=1	HDAC1	0	6	5.5	0	12	10.625	0	8	11	0	8.66667	9.04167	yes
Histone deacetylase 2 OS=Homo sapiens OX=9606 GN=HDAC2 PE=1 SV=2	HDAC2	0	5	0	0	10	12.75	0	7	8	0	7.33333	6.91667	yes
Helicase with zinc finger domain 2 OS=Homo sapiens OX=9606 GN=HELZ2 PE=1 SV=6	HELZ2	0	7	0	0	24	2.125	0	39	39	0	23.3333	13.7083	yes
Hexokinase-1 OS=Homo sapiens OX=9606 GN=HK1 PE=1 SV=3	HK1	5	24	27.5	4	31	38.25	0	10	13	3	21.6667	26.25	yes
Heterogeneous nuclear ribonucleoproteins A2/B1 OS=Homo sapiens OX=9606 GN=HNRNPA2B1 PE=1 SV=2	HNRNPA2B1	7	17	16.5	10	22	36.125	8	20	17	8.33333	19.6667	23.2083	yes
Heterogeneous nuclear ribonucleoprotein A3 OS=Homo sapiens OX=9606 GN=HNRNPA3 PE=1 SV=2	HNRNPA3	4	10	11	5	22	27.625	3	12	13	4	14.6667	17.2083	yes
Heterogeneous nuclear ribonucleoproteins C1/C2 OS=Homo sapiens OX=9606 GN=HNRNPC PE=1 SV=4	HNRNPC	6	13	12.375	8	23	25.5	6	20	20	6.66667	18.6667	19.2917	yes
Heterogeneous nuclear ribonucleoprotein D0 OS=Homo sapiens OX=9606 GN=HNRNPD PE=1 SV=1	HNRNPD	2	4	0	1	8	6.375	3	6	4	2	6	3.45833	yes
Heterogeneous nuclear ribonucleoprotein D-like OS=Homo sapiens OX=9606 GN=HNRNPDL PE=1 SV=3	HNRNPDL	0	4	2.75	0	5	6.375	0	8	10	0	5.66667	6.375	yes
Heterogeneous nuclear ribonucleoprotein F OS=Homo sapiens OX=9606 GN=HNRNPF PE=1 SV=3	HNRNPF	0	5	5.5	0	6	6.375	2	8	8	0.666667	6.33333	6.625	yes
Heterogeneous nuclear ribonucleoprotein H OS=Homo sapiens OX=9606 GN=HNRNPH1 PE=1 SV=4	HNRNPH1	6	12	13.75	2	9	12.75	6	13	13	4.66667	11.3333	13.1667	yes
Heterogeneous nuclear ribonucleoprotein H2 OS=Homo sapiens OX=9606 GN=HNRNPH2 PE=1 SV=1	HNRNPH2	0	8	0	0	9	10.625	3	10	8	1	9	6.20833	yes
Heterogeneous nuclear ribonucleoprotein H3 OS=Homo sapiens OX=9606 GN=HNRNPH3 PE=1 SV=2	HNRNPH3	2	6	6.875	2	10	10.625	0	10	13	1.33333	8.66667	10.1667	yes
Heterogeneous nuclear ribonucleoprotein L OS=Homo sapiens OX=9606 GN=HNRNPL PE=1 SV=2	HNRNPL	2	10	8.25	5	20	29.75	6	19	25	4.33333	16.3333	21	yes
Heterogeneous nuclear ribonucleoprotein M OS=Homo sapiens OX=9606 GN=HNRNPM PE=1 SV=3	HNRNPM	9	27	20.625	6	36	38.25	9	23	28	8	28.6667	28.9583	yes
Heterogeneous nuclear ribonucleoprotein R OS=Homo sapiens OX=9606 GN=HNRNPR PE=1 SV=1	HNRNPR	3	8	6.875	8	21	21.25	6	20	22	5.66667	16.3333	16.7083	yes
Heterogeneous nuclear ribonucleoprotein U OS=Homo sapiens OX=9606 GN=HNRNPU PE=1 SV=6	HNRNPU	10	23	15.125	10	27	40.375	6	19	15	8.66667	23	23.5	yes
Heterogeneous nuclear ribonucleoprotein U-like protein 2 OS=Homo sapiens OX=9606 GN=HNRNPUL2 PE=1 SV=1	HNRNPUL2	0	7	8.25	0	20	21.25	2	17	13	0.666667	14.6667	14.1667	yes
Heterochromatin protein 1-binding protein 3 OS=Homo sapiens OX=9606 GN=HP1BP3 PE=1 SV=1	HP1BP3	0	13	5.5	1	16	23.375	0	8	10	0.333333	12.3333	12.9583	yes
Heat shock 70 kDa protein 1A OS=Homo sapiens OX=9606 GN=HSPA1A PE=1 SV=1	HSPA1A	0	10	6.875	2	15	23.375	0	20	24	0.666667	15	18.0833	yes
Endoplasmic reticulum chaperone BiP OS=Homo sapiens OX=9606 GN=HSPA5 PE=1 SV=2	HSPA5	8	20	17.875	3	8	8.5	0	10	7	3.66667	12.6667	11.125	yes
Heat shock cognate 71 kDa protein OS=Homo sapiens OX=9606 GN=HSPA8 PE=1 SV=1	HSPA8	8	19	23.375	8	23	31.875	5	20	22	7	20.6667	25.75	yes
Heat shock protein beta-1 OS=Homo sapiens OX=9606 GN=HSPB1 PE=1 SV=2	HSPB1	0	2	0	1	2	0	0	3	4	0.333333	2.33333	1.33333	yes
60 kDa heat shock protein, mitochondrial OS=Homo sapiens OX=9606 GN=HSPD1 PE=1 SV=2	HSPD1	14	29	31.625	0	2	0	0	3	3	4.66667	11.3333	11.5417	yes
Gamma-interferon-inducible protein 16 OS=Homo sapiens OX=9606 GN=IFI16 PE=1 SV=3	IFI16	0	14	4.125	0	23	10.625	0	21	20	0	19.3333	11.5833	yes
Interleukin enhancer-binding factor 2 OS=Homo sapiens OX=9606 GN=ILF2 PE=1 SV=2	ILF2	2	8	6.875	5	20	27.625	6	19	18	4.33333	15.6667	17.5	yes
Interleukin enhancer-binding factor 3 OS=Homo sapiens OX=9606 GN=ILF3 PE=1 SV=3	ILF3	0	15	5.5	6	29	36.125	7	32	25	4.33333	25.3333	22.2083	yes
Ubiquitin-like protein ISG15 OS=Homo sapiens OX=9606 GN=ISG15 PE=1 SV=5	ISG15	0	6	2.75	1	6	10.625	0	3	4	0.333333	5	5.79167	yes
KH domain-containing, RNA-binding, signal transduction-associated protein 1 OS=Homo sapiens OX=9606 GN=KHDRBS1 PE=1 SV=1	KHDRBS1	0	8	4.125	0	9	8.5	0	4	6	0	7	6.20833	yes
L-lactate dehydrogenase A chain OS=Homo sapiens OX=9606 GN=LDHA PE=1 SV=2	LDHA	0	12	11	0	6	0	0	5	3	0	7.66667	4.66667	yes
Prelamin-A/C OS=Homo sapiens OX=9606 GN=LMNA PE=1 SV=1	LMNA	14	40	45.375	11	40	48.875	8	21	22	11	33.6667	38.75	yes
Lamin-B2 OS=Homo sapiens OX=9606 GN=LMNB2 PE=1 SV=4	LMNB2	0	9	6.875	0	13	4.25	0	9	6	0	10.3333	5.70833	yes
Microtubule-associated protein 4 OS=Homo sapiens OX=9606 GN=MAP4 PE=1 SV=3	MAP4	0	2	0	0	8	0	0	5	4	0	5	1.33333	yes
Matrin-3 OS=Homo sapiens OX=9606 GN=MATR3 PE=1 SV=2	MATR3	6	19	13.75	6	36	46.75	9	30	27	7	28.3333	29.1667	yes
Lysophospholipid acyltransferase 7 OS=Homo sapiens OX=9606 GN=MBOAT7 PE=1 SV=2	MBOAT7	0	3	0	0	3	2.125	0	3	0	0	3	0.708333	yes
Cytochrome c oxidase subunit 2 OS=Homo sapiens OX=9606 GN=MT-CO2 PE=1 SV=1	MT-CO2	0	3	0	1	3	2.125	0	3	4	0.333333	3	2.04167	yes
Metastasis-associated protein MTA1 OS=Homo sapiens OX=9606 GN=MTA1 PE=1 SV=2	MTA1	0	2	0	0	12	4.25	0	13	13	0	9	5.75	yes
Mitochondrial carrier homolog 2 OS=Homo sapiens OX=9606 GN=MTCH2 PE=1 SV=1	MTCH2	0	6	2.75	0	6	2.125	0	4	7	0	5.33333	3.95833	yes
Exosome RNA helicase MTR4 OS=Homo sapiens OX=9606 GN=MTREX PE=1 SV=3	MTREX	0	4	0	0	7	2.125	0	13	13	0	8	5.04167	yes
Interferon-induced GTP-binding protein Mx2 OS=Homo sapiens OX=9606 GN=MX2 PE=1 SV=1	MX2	0	18	6.875	0	12	10.625	0	23	25	0	17.6667	14.1667	yes
Myb-binding protein 1A OS=Homo sapiens OX=9606 GN=MYBBP1A PE=1 SV=2	MYBBP1A	0	9	4.125	0	22	2.125	0	26	28	0	19	11.4167	yes
Myoferlin OS=Homo sapiens OX=9606 GN=MYOF PE=1 SV=1	MYOF	0	4	2.75	0	20	0	0	5	4	0	9.66667	2.25	yes
RNA cytidine acetyltransferase OS=Homo sapiens OX=9606 GN=NAT10 PE=1 SV=2	NAT10	0	15	5.5	0	16	8.5	0	18	18	0	16.3333	10.6667	yes
Nucleolin OS=Homo sapiens OX=9606 GN=NCL PE=1 SV=3	NCL	0	14	4.125	7	22	34	3	15	17	3.33333	17	18.375	yes
NADH dehydrogenase [ubiquinone] 1 alpha subcomplex subunit 10, mitochondrial OS=Homo sapiens OX=9606 GN=NDUFA10 PE=1 SV=1	NDUFA10	0	4	2.75	0	8	6.375	0	4	6	0	5.33333	5.04167	yes
NADH dehydrogenase [ubiquinone] 1 alpha subcomplex subunit 13 OS=Homo sapiens OX=9606 GN=NDUFA13 PE=1 SV=3	NDUFA13	0	3	0	0	6	0	0	4	4	0	4.33333	1.33333	yes
NADH dehydrogenase [ubiquinone] 1 alpha subcomplex subunit 5 OS=Homo sapiens OX=9606 GN=NDUFA5 PE=1 SV=3	NDUFA5	0	2	0	1	3	2.125	0	2	0	0.333333	2.33333	0.708333	yes
NADH dehydrogenase [ubiquinone] 1 alpha subcomplex subunit 6 OS=Homo sapiens OX=9606 GN=NDUFA6 PE=1 SV=3	NDUFA6	0	2	0	0	3	4.25	0	2	3	0	2.33333	2.41667	yes
NADH dehydrogenase [ubiquinone] 1 alpha subcomplex subunit 9, mitochondrial OS=Homo sapiens OX=9606 GN=NDUFA9 PE=1 SV=2	NDUFA9	0	5	0	0	14	14.875	0	8	8	0	9	7.625	yes
NADH dehydrogenase [ubiquinone] 1 beta subcomplex subunit 10 OS=Homo sapiens OX=9606 GN=NDUFB10 PE=1 SV=3	NDUFB10	0	2	0	0	3	2.125	0	2	3	0	2.33333	1.70833	yes
NADH dehydrogenase [ubiquinone] 1 beta subcomplex subunit 4 OS=Homo sapiens OX=9606 GN=NDUFB4 PE=1 SV=3	NDUFB4	0	3	0	1	4	2.125	0	4	4	0.333333	3.66667	2.04167	yes
NADH-ubiquinone oxidoreductase 75 kDa subunit, mitochondrial OS=Homo sapiens OX=9606 GN=NDUFS1 PE=1 SV=3	NDUFS1	0	7	2.75	0	15	8.5	0	8	11	0	10	7.41667	yes
NADH dehydrogenase [ubiquinone] iron-sulfur protein 2, mitochondrial OS=Homo sapiens OX=9606 GN=NDUFS2 PE=1 SV=2	NDUFS2	0	3	0	0	8	0	0	2	3	0	4.33333	1	yes
NADH dehydrogenase [ubiquinone] iron-sulfur protein 3, mitochondrial OS=Homo sapiens OX=9606 GN=NDUFS3 PE=1 SV=1	NDUFS3	0	3	0	0	7	0	0	3	3	0	4.33333	1	yes
NADH dehydrogenase [ubiquinone] iron-sulfur protein 8, mitochondrial OS=Homo sapiens OX=9606 GN=NDUFS8 PE=1 SV=1	NDUFS8	0	2	0	0	3	2.125	0	3	3	0	2.66667	1.70833	yes
NADH dehydrogenase [ubiquinone] flavoprotein 1, mitochondrial OS=Homo sapiens OX=9606 GN=NDUFV1 PE=1 SV=4	NDUFV1	0	3	0	0	9	0	0	2	6	0	4.66667	2	yes
H/ACA ribonucleoprotein complex subunit 2 OS=Homo sapiens OX=9606 GN=NHP2 PE=1 SV=1	NHP2	0	2	0	1	2	4.25	0	3	3	0.333333	2.33333	2.41667	yes
Nucleolar and coiled-body phosphoprotein 1 OS=Homo sapiens OX=9606 GN=NOLC1 PE=1 SV=2	NOLC1	0	6	11	2	6	0	0	2	0	0.666667	4.66667	3.66667	yes
Non-POU domain-containing octamer-binding protein OS=Homo sapiens OX=9606 GN=NONO PE=1 SV=4	NONO	0	14	11	6	26	42.5	3	10	14	3	16.6667	22.5	yes
Probable 28S rRNA (cytosine(4447)-C(5))-methyltransferase OS=Homo sapiens OX=9606 GN=NOP2 PE=1 SV=2	NOP2	0	7	4.125	0	11	14.875	0	12	14	0	10	11	yes
Nucleolar protein 56 OS=Homo sapiens OX=9606 GN=NOP56 PE=1 SV=4	NOP56	2	12	12.375	0	13	2.125	0	15	11	0.666667	13.3333	8.5	yes
Nucleolar protein 58 OS=Homo sapiens OX=9606 GN=NOP58 PE=1 SV=1	NOP58	0	14	9.625	0	15	12.75	0	16	15	0	15	12.4583	yes
Nuclear mitotic apparatus protein 1 OS=Homo sapiens OX=9606 GN=NUMA1 PE=1 SV=2	NUMA1	0	14	0	0	31	12.75	0	39	39	0	28	17.25	yes
Nuclear pore complex protein Nup155 OS=Homo sapiens OX=9606 GN=NUP155 PE=1 SV=1	NUP155	0	12	4.125	0	13	2.125	0	23	22	0	16	9.41667	yes
Nuclear pore complex protein Nup160 OS=Homo sapiens OX=9606 GN=NUP160 PE=1 SV=3	NUP160	0	5	0	0	11	0	0	17	17	0	11	5.66667	yes
Nuclear pore complex protein Nup205 OS=Homo sapiens OX=9606 GN=NUP205 PE=1 SV=3	NUP205	0	8	2.75	0	7	0	0	26	25	0	13.6667	9.25	yes
Nuclear pore complex protein Nup85 OS=Homo sapiens OX=9606 GN=NUP85 PE=1 SV=1	NUP85	0	6	0	0	6	6.375	0	13	14	0	8.33333	6.79167	yes
Nuclear pore complex protein Nup93 OS=Homo sapiens OX=9606 GN=NUP93 PE=1 SV=2	NUP93	0	9	4.125	0	9	4.25	0	18	20	0	12	9.45833	yes
2'-5'-oligoadenylate synthase 2 OS=Homo sapiens OX=9606 GN=OAS2 PE=1 SV=3	OAS2	0	6	4.125	0	7	2.125	0	6	10	0	6.33333	5.41667	yes
2'-5'-oligoadenylate synthase 3 OS=Homo sapiens OX=9606 GN=OAS3 PE=1 SV=3	OAS3	0	9	0	0	5	0	0	10	8	0	8	2.66667	yes
2'-5'-oligoadenylate synthase-like protein OS=Homo sapiens OX=9606 GN=OASL PE=1 SV=2	OASL	0	10	4.125	0	15	12.75	0	15	17	0	13.3333	11.2917	yes
Polyadenylate-binding protein 1 OS=Homo sapiens OX=9606 GN=PABPC1 PE=1 SV=2	PABPC1	0	7	0	2	14	12.75	0	13	18	0.666667	11.3333	10.25	yes
Poly [ADP-ribose] polymerase 1 OS=Homo sapiens OX=9606 GN=PARP1 PE=1 SV=4	PARP1	0	23	12.375	1	32	23.375	6	36	41	2.33333	30.3333	25.5833	yes
Poly [ADP-ribose] polymerase 9 OS=Homo sapiens OX=9606 GN=PARP9 PE=1 SV=2	PARP9	0	8	0	0	6	0	0	10	10	0	8	3.33333	yes
Poly(rC)-binding protein 1 OS=Homo sapiens OX=9606 GN=PCBP1 PE=1 SV=2	PCBP1	0	3	0	1	4	2.125	0	6	7	0.333333	4.33333	3.04167	yes
Poly(rC)-binding protein 2 OS=Homo sapiens OX=9606 GN=PCBP2 PE=1 SV=1	PCBP2	0	3	0	0	8	2.125	0	7	7	0	6	3.04167	yes
Sister chromatid cohesion protein PDS5 homolog B OS=Homo sapiens OX=9606 GN=PDS5B PE=1 SV=1	PDS5B	0	4	0	0	19	6.375	0	20	18	0	14.3333	8.125	yes
Serine/threonine-protein phosphatase PGAM5, mitochondrial OS=Homo sapiens OX=9606 GN=PGAM5 PE=1 SV=2	PGAM5	0	3	4.125	1	11	14.875	0	6	6	0.333333	6.66667	8.33333	yes
Phosphoglycerate kinase 1 OS=Homo sapiens OX=9606 GN=PGK1 PE=1 SV=3	PGK1	2	17	13.75	0	3	0	0	3	3	0.666667	7.66667	5.58333	yes
Prohibitin OS=Homo sapiens OX=9606 GN=PHB PE=1 SV=1	PHB	0	8	9.625	2	11	12.75	0	9	11	0.666667	9.33333	11.125	yes
Prohibitin-2 OS=Homo sapiens OX=9606 GN=PHB2 PE=1 SV=2	PHB2	2	10	11	2	15	19.125	0	9	11	1.33333	11.3333	13.7083	yes
Pyruvate kinase PKM OS=Homo sapiens OX=9606 GN=PKM PE=1 SV=4	PKM	3	21	16.5	2	11	14.875	0	9	8	1.66667	13.6667	13.125	yes
Plakophilin-1 OS=Homo sapiens OX=9606 GN=PKP1 PE=1 SV=2	PKP1	0	3	0	1	7	4.25	0	10	10	0.333333	6.66667	4.75	yes
Plectin OS=Homo sapiens OX=9606 GN=PLEC PE=1 SV=3	PLEC	79	237	280.5	24	117	53.125	5	107	102	36	153.667	145.208	yes
Procollagen-lysine,2-oxoglutarate 5-dioxygenase 1 OS=Homo sapiens OX=9606 GN=PLOD1 PE=1 SV=2	PLOD1	0	11	2.75	0	5	0	0	4	4	0	6.66667	2.25	yes
Polymerase delta-interacting protein 3 OS=Homo sapiens OX=9606 GN=POLDIP3 PE=1 SV=2	POLDIP3	0	2	0	0	12	2.125	0	5	8	0	6.33333	3.375	yes
Peptidyl-prolyl cis-trans isomerase B OS=Homo sapiens OX=9606 GN=PPIB PE=1 SV=2	PPIB	0	10	4.125	1	5	4.25	0	10	6	0.333333	8.33333	4.79167	yes
Serine/threonine-protein phosphatase PP1-alpha catalytic subunit OS=Homo sapiens OX=9606 GN=PPP1CA PE=1 SV=1	PPP1CA	0	4	0	1	7	0	0	7	6	0.333333	6	2	yes
Peroxiredoxin-6 OS=Homo sapiens OX=9606 GN=PRDX6 PE=1 SV=3	PRDX6	0	2	2.75	0	2	0	0	3	0	0	2.33333	0.916667	yes
DNA-dependent protein kinase catalytic subunit OS=Homo sapiens OX=9606 GN=PRKDC PE=1 SV=3	PRKDC	0	49	6.875	0	80	46.75	0	81	80	0	70	44.5417	yes
Protein arginine N-methyltransferase 1 OS=Homo sapiens OX=9606 GN=PRMT1 PE=1 SV=3	PRMT1	0	3	0	0	3	2.125	0	4	3	0	3.33333	1.70833	yes
Pre-mRNA-processing factor 19 OS=Homo sapiens OX=9606 GN=PRPF19 PE=1 SV=1	PRPF19	0	2	0	1	10	4.25	0	11	13	0.333333	7.66667	5.75	yes
U4/U6 small nuclear ribonucleoprotein Prp31 OS=Homo sapiens OX=9606 GN=PRPF31 PE=1 SV=2	PRPF31	0	3	0	0	9	4.25	0	12	11	0	8	5.08333	yes
Pre-mRNA-processing factor 6 OS=Homo sapiens OX=9606 GN=PRPF6 PE=1 SV=1	PRPF6	0	8	2.75	0	16	12.75	0	14	18	0	12.6667	11.1667	yes
Pre-mRNA-processing-splicing factor 8 OS=Homo sapiens OX=9606 GN=PRPF8 PE=1 SV=2	PRPF8	0	34	13.75	1	62	53.125	8	71	78	3	55.6667	48.2917	yes
PC4 and SFRS1-interacting protein OS=Homo sapiens OX=9606 GN=PSIP1 PE=1 SV=1	PSIP1	0	2	2.75	0	7	6.375	2	5	4	0.666667	4.66667	4.375	yes
26S proteasome regulatory subunit 4 OS=Homo sapiens OX=9606 GN=PSMC1 PE=1 SV=1	PSMC1	0	2	0	0	6	4.25	0	7	3	0	5	2.41667	yes
26S proteasome regulatory subunit 7 OS=Homo sapiens OX=9606 GN=PSMC2 PE=1 SV=3	PSMC2	0	3	0	0	8	2.125	0	3	4	0	4.66667	2.04167	yes
26S proteasome regulatory subunit 6A OS=Homo sapiens OX=9606 GN=PSMC3 PE=1 SV=3	PSMC3	0	2	0	0	9	0	0	7	7	0	6	2.33333	yes
26S proteasome regulatory subunit 8 OS=Homo sapiens OX=9606 GN=PSMC5 PE=1 SV=1	PSMC5	0	3	0	0	8	4.25	0	9	10	0	6.66667	4.75	yes
26S proteasome regulatory subunit 10B OS=Homo sapiens OX=9606 GN=PSMC6 PE=1 SV=1	PSMC6	0	2	0	0	6	0	0	7	7	0	5	2.33333	yes
26S proteasome non-ATPase regulatory subunit 13 OS=Homo sapiens OX=9606 GN=PSMD13 PE=1 SV=2	PSMD13	0	2	0	0	4	4.25	0	7	3	0	4.33333	2.41667	yes
26S proteasome non-ATPase regulatory subunit 3 OS=Homo sapiens OX=9606 GN=PSMD3 PE=1 SV=2	PSMD3	0	2	0	0	9	2.125	0	6	6	0	5.66667	2.70833	yes
26S proteasome non-ATPase regulatory subunit 7 OS=Homo sapiens OX=9606 GN=PSMD7 PE=1 SV=2	PSMD7	0	2	0	0	4	2.125	0	3	0	0	3	0.708333	yes
Paraspeckle component 1 OS=Homo sapiens OX=9606 GN=PSPC1 PE=1 SV=1	PSPC1	0	3	0	0	7	6.375	0	7	4	0	5.66667	3.45833	yes
Polypyrimidine tract-binding protein 1 OS=Homo sapiens OX=9606 GN=PTBP1 PE=1 SV=1	PTBP1	6	16	11	8	18	34	8	16	20	7.33333	16.6667	21.6667	yes
Polypyrimidine tract-binding protein 3 OS=Homo sapiens OX=9606 GN=PTBP3 PE=1 SV=2	PTBP3	0	7	0	0	8	10.625	0	5	4	0	6.66667	4.875	yes
Phosphatidylserine synthase 1 OS=Homo sapiens OX=9606 GN=PTDSS1 PE=1 SV=1	PTDSS1	0	3	2.75	0	3	4.25	0	3	3	0	3	3.33333	yes
Periodic tryptophan protein 2 homolog OS=Homo sapiens OX=9606 GN=PWP2 PE=2 SV=2	PWP2	0	2	0	0	5	0	0	4	7	0	3.66667	2.33333	yes
Ras-related protein Rab-10 OS=Homo sapiens OX=9606 GN=RAB10 PE=1 SV=1	RAB10	0	8	2.75	0	2	0	0	3	3	0	4.33333	1.91667	yes
mRNA export factor OS=Homo sapiens OX=9606 GN=RAE1 PE=1 SV=1	RAE1	0	6	4.125	0	4	0	0	6	6	0	5.33333	3.375	yes
RNA-binding protein Raly OS=Homo sapiens OX=9606 GN=RALY PE=1 SV=1	RALY	2	8	5.5	4	16	17	2	8	7	2.66667	10.6667	9.83333	yes
GTP-binding nuclear protein Ran OS=Homo sapiens OX=9606 GN=RAN PE=1 SV=3	RAN	0	3	2.75	1	7	2.125	2	4	6	1	4.66667	3.625	yes
Ran GTPase-activating protein 1 OS=Homo sapiens OX=9606 GN=RANGAP1 PE=1 SV=1	RANGAP1	0	2	0	0	10	2.125	0	9	11	0	7	4.375	yes
Arginine--tRNA ligase, cytoplasmic OS=Homo sapiens OX=9606 GN=RARS PE=1 SV=2	RARS	0	2	0	0	3	0	0	5	4	0	3.33333	1.33333	yes
RNA-binding protein 14 OS=Homo sapiens OX=9606 GN=RBM14 PE=1 SV=2	RBM14	0	7	4.125	0	17	12.75	0	9	8	0	11	8.29167	yes
RNA-binding protein 25 OS=Homo sapiens OX=9606 GN=RBM25 PE=1 SV=3	RBM25	0	8	4.125	0	12	12.75	4	16	11	1.33333	12	9.29167	yes
RNA-binding motif protein, X chromosome OS=Homo sapiens OX=9606 GN=RBMX PE=1 SV=3	RBMX	4	12	11	3	18	29.75	3	7	6	3.33333	12.3333	15.5833	yes
RNA binding motif protein, X-linked-like-1 OS=Homo sapiens OX=9606 GN=RBMXL1 PE=1 SV=1	RBMXL1	0	8	0	3	16	23.375	0	5	0	1	9.66667	7.79167	yes
Regulator of chromosome condensation OS=Homo sapiens OX=9606 GN=RCC1 PE=1 SV=1	RCC1	0	8	5.5	3	11	12.75	0	11	14	1	10	10.75	yes
60S ribosomal protein L10 OS=Homo sapiens OX=9606 GN=RPL10 PE=1 SV=4	RPL10	0	3	4.125	0	8	6.375	0	4	6	0	5	5.5	yes
60S ribosomal protein L10a OS=Homo sapiens OX=9606 GN=RPL10A PE=1 SV=2	RPL10A	3	7	5.5	1	7	8.5	4	9	14	2.66667	7.66667	9.33333	yes
60S ribosomal protein L13a OS=Homo sapiens OX=9606 GN=RPL13A PE=1 SV=2	RPL13A	2	5	5.5	2	7	8.5	0	4	6	1.33333	5.33333	6.66667	yes
60S ribosomal protein L14 OS=Homo sapiens OX=9606 GN=RPL14 PE=1 SV=4	RPL14	0	2	2.75	0	6	6.375	0	3	4	0	3.66667	4.375	yes
60S ribosomal protein L15 OS=Homo sapiens OX=9606 GN=RPL15 PE=1 SV=2	RPL15	2	5	4.125	3	10	17	2	4	6	2.33333	6.33333	9.04167	yes
60S ribosomal protein L17 OS=Homo sapiens OX=9606 GN=RPL17 PE=1 SV=3	RPL17	2	4	4.125	0	8	4.25	3	7	10	1.66667	6.33333	6.125	yes
60S ribosomal protein L18 OS=Homo sapiens OX=9606 GN=RPL18 PE=1 SV=2	RPL18	2	4	4.125	2	6	6.375	0	4	6	1.33333	4.66667	5.5	yes
60S ribosomal protein L18a OS=Homo sapiens OX=9606 GN=RPL18A PE=1 SV=2	RPL18A	0	3	0	1	5	6.375	3	7	8	1.33333	5	4.79167	yes
60S ribosomal protein L21 OS=Homo sapiens OX=9606 GN=RPL21 PE=1 SV=2	RPL21	0	3	2.75	0	7	2.125	0	5	8	0	5	4.29167	yes
60S ribosomal protein L3 OS=Homo sapiens OX=9606 GN=RPL3 PE=1 SV=2	RPL3	3	11	9.625	1	15	21.25	3	13	15	2.33333	13	15.2917	yes
60S ribosomal protein L30 OS=Homo sapiens OX=9606 GN=RPL30 PE=1 SV=2	RPL30	0	2	0	0	5	4.25	0	5	7	0	4	3.75	yes
60S ribosomal protein L32 OS=Homo sapiens OX=9606 GN=RPL32 PE=1 SV=2	RPL32	0	2	0	1	5	6.375	0	7	10	0.333333	4.66667	5.45833	yes
60S ribosomal protein L36 OS=Homo sapiens OX=9606 GN=RPL36 PE=1 SV=3	RPL36	0	2	0	1	4	2.125	0	6	6	0.333333	4	2.70833	yes
60S ribosomal protein L4 OS=Homo sapiens OX=9606 GN=RPL4 PE=1 SV=5	RPL4	2	10	11	2	16	25.5	7	14	15	3.66667	13.3333	17.1667	yes
60S ribosomal protein L5 OS=Homo sapiens OX=9606 GN=RPL5 PE=1 SV=3	RPL5	0	5	4.125	1	9	4.25	0	10	13	0.333333	8	7.125	yes
60S ribosomal protein L6 OS=Homo sapiens OX=9606 GN=RPL6 PE=1 SV=3	RPL6	7	14	13.75	5	20	25.5	4	10	10	5.33333	14.6667	16.4167	yes
60S ribosomal protein L7 OS=Homo sapiens OX=9606 GN=RPL7 PE=1 SV=1	RPL7	4	11	13.75	2	16	19.125	5	14	14	3.66667	13.6667	15.625	yes
60S ribosomal protein L7a OS=Homo sapiens OX=9606 GN=RPL7A PE=1 SV=2	RPL7A	4	8	8.25	3	16	21.25	3	7	10	3.33333	10.3333	13.1667	yes
60S ribosomal protein L8 OS=Homo sapiens OX=9606 GN=RPL8 PE=1 SV=2	RPL8	0	3	2.75	1	11	14.875	0	4	7	0.333333	6	8.20833	yes
60S ribosomal protein L9 OS=Homo sapiens OX=9606 GN=RPL9 PE=1 SV=1	RPL9	2	5	4.125	1	7	8.5	3	8	10	2	6.66667	7.54167	yes
60S acidic ribosomal protein P0 OS=Homo sapiens OX=9606 GN=RPLP0 PE=1 SV=1	RPLP0	3	10	5.5	1	13	10.625	5	14	14	3	12.3333	10.0417	yes
60S acidic ribosomal protein P2 OS=Homo sapiens OX=9606 GN=RPLP2 PE=1 SV=1	RPLP2	0	2	0	0	6	2.125	2	8	10	0.666667	5.33333	4.04167	yes
Dolichyl-diphosphooligosaccharide--protein glycosyltransferase subunit 1 OS=Homo sapiens OX=9606 GN=RPN1 PE=1 SV=1	RPN1	2	17	15.125	4	19	23.375	0	13	18	2	16.3333	18.8333	yes
Dolichyl-diphosphooligosaccharide--protein glycosyltransferase subunit 2 OS=Homo sapiens OX=9606 GN=RPN2 PE=1 SV=3	RPN2	2	12	6.875	1	14	6.375	0	12	17	1	12.6667	10.0833	yes
40S ribosomal protein S10 OS=Homo sapiens OX=9606 GN=RPS10 PE=1 SV=1	RPS10	0	3	0	0	4	4.25	0	6	7	0	4.33333	3.75	yes
40S ribosomal protein S12 OS=Homo sapiens OX=9606 GN=RPS12 PE=1 SV=3	RPS12	0	2	2.75	0	2	4.25	0	2	3	0	2	3.33333	yes
40S ribosomal protein S15 OS=Homo sapiens OX=9606 GN=RPS15 PE=1 SV=2	RPS15	0	2	2.75	1	4	6.375	0	4	6	0.333333	3.33333	5.04167	yes
40S ribosomal protein S15a OS=Homo sapiens OX=9606 GN=RPS15A PE=1 SV=2	RPS15A	0	3	4.125	2	5	4.25	3	6	7	1.66667	4.66667	5.125	yes
40S ribosomal protein S16 OS=Homo sapiens OX=9606 GN=RPS16 PE=1 SV=2	RPS16	2	5	4.125	3	9	8.5	2	7	7	2.33333	7	6.54167	yes
40S ribosomal protein S19 OS=Homo sapiens OX=9606 GN=RPS19 PE=1 SV=2	RPS19	2	7	6.875	2	7	6.375	2	7	8	2	7	7.08333	yes
40S ribosomal protein S27 OS=Homo sapiens OX=9606 GN=RPS27 PE=1 SV=3	RPS27	0	2	0	0	2	0	0	2	3	0	2	1	yes
40S ribosomal protein S3 OS=Homo sapiens OX=9606 GN=RPS3 PE=1 SV=2	RPS3	6	13	8.25	1	12	10.625	4	15	17	3.66667	13.3333	11.9583	yes
40S ribosomal protein S3a OS=Homo sapiens OX=9606 GN=RPS3A PE=1 SV=2	RPS3A	0	7	2.75	0	12	6.375	0	7	8	0	8.66667	5.70833	yes
40S ribosomal protein S9 OS=Homo sapiens OX=9606 GN=RPS9 PE=1 SV=3	RPS9	4	10	9.625	3	14	14.875	3	8	11	3.33333	10.6667	11.8333	yes
Ribosome-binding protein 1 OS=Homo sapiens OX=9606 GN=RRBP1 PE=1 SV=5	RRBP1	0	13	4.125	0	38	21.25	0	26	27	0	25.6667	17.4583	yes
RRP12-like protein OS=Homo sapiens OX=9606 GN=RRP12 PE=1 SV=2	RRP12	0	2	0	0	4	2.125	0	6	4	0	4	2.04167	yes
Ribosomal L1 domain-containing protein 1 OS=Homo sapiens OX=9606 GN=RSL1D1 PE=1 SV=3	RSL1D1	0	8	0	1	10	8.5	0	13	11	0.333333	10.3333	6.5	yes
tRNA-splicing ligase RtcB homolog OS=Homo sapiens OX=9606 GN=RTCB PE=1 SV=1	RTCB	0	6	0	0	10	4.25	0	9	13	0	8.33333	5.75	yes
RNA transcription, translation and transport factor protein OS=Homo sapiens OX=9606 GN=RTRAF PE=1 SV=1	RTRAF	0	3	0	0	3	4.25	0	7	10	0	4.33333	4.75	yes
RuvB-like 1 OS=Homo sapiens OX=9606 GN=RUVBL1 PE=1 SV=1	RUVBL1	0	2	0	0	10	8.5	0	7	10	0	6.33333	6.16667	yes
Protein S100-A10 OS=Homo sapiens OX=9606 GN=S100A10 PE=1 SV=2	S100A10	0	2	2.75	1	2	0	0	2	0	0.333333	2	0.916667	yes
Scaffold attachment factor B1 OS=Homo sapiens OX=9606 GN=SAFB PE=1 SV=4	SAFB	0	3	0	1	15	23.375	0	9	10	0.333333	9	11.125	yes
Scaffold attachment factor B2 OS=Homo sapiens OX=9606 GN=SAFB2 PE=1 SV=1	SAFB2	0	2	0	0	14	14.875	0	10	8	0	8.66667	7.625	yes
Deoxynucleoside triphosphate triphosphohydrolase SAMHD1 OS=Homo sapiens OX=9606 GN=SAMHD1 PE=1 SV=2	SAMHD1	0	4	0	0	6	0	0	3	6	0	4.33333	2	yes
Sorting and assembly machinery component 50 homolog OS=Homo sapiens OX=9606 GN=SAMM50 PE=1 SV=3	SAMM50	0	2	0	0	2	0	0	5	4	0	3	1.33333	yes
Histone deacetylase complex subunit SAP18 OS=Homo sapiens OX=9606 GN=SAP18 PE=1 SV=1	SAP18	2	5	2.75	0	2	2.125	0	3	3	0.666667	3.33333	2.625	yes
Squamous cell carcinoma antigen recognized by T-cells 3 OS=Homo sapiens OX=9606 GN=SART3 PE=1 SV=1	SART3	0	7	0	2	8	2.125	0	6	6	0.666667	7	2.70833	yes
Protein transport protein Sec61 subunit alpha isoform 1 OS=Homo sapiens OX=9606 GN=SEC61A1 PE=1 SV=2	SEC61A1	0	4	2.75	0	5	2.125	0	3	3	0	4	2.625	yes
Splicing factor 3A subunit 3 OS=Homo sapiens OX=9606 GN=SF3A3 PE=1 SV=1	SF3A3	0	3	0	0	4	4.25	0	5	6	0	4	3.41667	yes
Splicing factor 3B subunit 1 OS=Homo sapiens OX=9606 GN=SF3B1 PE=1 SV=3	SF3B1	0	19	12.375	2	48	44.625	4	39	46	2	35.3333	34.3333	yes
Sphingosine-1-phosphate lyase 1 OS=Homo sapiens OX=9606 GN=SGPL1 PE=1 SV=3	SGPL1	0	5	0	0	8	0	0	6	4	0	6.33333	1.33333	yes
Monocarboxylate transporter 1 OS=Homo sapiens OX=9606 GN=SLC16A1 PE=1 SV=3	SLC16A1	0	2	0	0	2	0	0	2	4	0	2	1.33333	yes
Mitochondrial 2-oxoglutarate/malate carrier protein OS=Homo sapiens OX=9606 GN=SLC25A11 PE=1 SV=3	SLC25A11	0	7	6.875	0	9	2.125	0	4	10	0	6.66667	6.33333	yes
Calcium-binding mitochondrial carrier protein Aralar2 OS=Homo sapiens OX=9606 GN=SLC25A13 PE=1 SV=2	SLC25A13	0	9	0	0	18	0	0	6	11	0	11	3.66667	yes
Phosphate carrier protein, mitochondrial OS=Homo sapiens OX=9606 GN=SLC25A3 PE=1 SV=2	SLC25A3	3	16	15.125	2	9	6.375	0	7	6	1.66667	10.6667	9.16667	yes
ADP/ATP translocase 1 OS=Homo sapiens OX=9606 GN=SLC25A4 PE=1 SV=4	SLC25A4	0	14	15.125	4	9	10.625	0	7	14	1.33333	10	13.25	yes
ADP/ATP translocase 3 OS=Homo sapiens OX=9606 GN=SLC25A6 PE=1 SV=4	SLC25A6	9	18	17.875	5	14	17	0	12	17	4.66667	14.6667	17.2917	yes
Probable global transcription activator SNF2L1 OS=Homo sapiens OX=9606 GN=SMARCA1 PE=1 SV=2	SMARCA1	0	11	0	0	34	23.375	0	21	21	0	22	14.7917	yes
SWI/SNF-related matrix-associated actin-dependent regulator of chromatin subfamily A member 5 OS=Homo sapiens OX=9606 GN=SMARCA5 PE=1 SV=1	SMARCA5	0	23	11	0	49	48.875	0	34	36	0	35.3333	31.9583	yes
Structural maintenance of chromosomes protein 3 OS=Homo sapiens OX=9606 GN=SMC3 PE=1 SV=2	SMC3	0	4	0	0	22	2.125	0	20	18	0	15.3333	6.70833	yes
Staphylococcal nuclease domain-containing protein 1 OS=Homo sapiens OX=9606 GN=SND1 PE=1 SV=1	SND1	0	18	11	0	19	14.875	0	23	28	0	20	17.9583	yes
U5 small nuclear ribonucleoprotein 200 kDa helicase OS=Homo sapiens OX=9606 GN=SNRNP200 PE=1 SV=2	SNRNP200	0	24	6.875	0	59	34	0	70	67	0	51	35.9583	yes
U5 small nuclear ribonucleoprotein 40 kDa protein OS=Homo sapiens OX=9606 GN=SNRNP40 PE=1 SV=1	SNRNP40	0	2	0	0	7	4.25	0	9	10	0	6	4.75	yes
U2 small nuclear ribonucleoprotein A' OS=Homo sapiens OX=9606 GN=SNRPA1 PE=1 SV=2	SNRPA1	0	5	0	2	10	21.25	2	10	10	1.33333	8.33333	10.4167	yes
NHP2-like protein 1 OS=Homo sapiens OX=9606 GN=SNU13 PE=1 SV=3	SNU13	0	3	2.75	0	2	0	0	2	3	0	2.33333	1.91667	yes
Protein SON OS=Homo sapiens OX=9606 GN=SON PE=1 SV=4	SON	0	4	4.125	0	3	0	3	10	13	1	5.66667	5.70833	yes
SPATS2-like protein OS=Homo sapiens OX=9606 GN=SPATS2L PE=1 SV=2	SPATS2L	0	6	0	0	10	4.25	0	10	11	0	8.66667	5.08333	yes
Sequestosome-1 OS=Homo sapiens OX=9606 GN=SQSTM1 PE=1 SV=1	SQSTM1	0	3	0	0	3	2.125	0	2	3	0	2.66667	1.70833	yes
Signal recognition particle subunit SRP72 OS=Homo sapiens OX=9606 GN=SRP72 PE=1 SV=3	SRP72	0	6	0	0	2	0	0	3	4	0	3.66667	1.33333	yes
Signal recognition particle receptor subunit alpha OS=Homo sapiens OX=9606 GN=SRPRA PE=1 SV=2	SRPRA	0	5	0	0	11	0	0	5	11	0	7	3.66667	yes
Signal recognition particle receptor subunit beta OS=Homo sapiens OX=9606 GN=SRPRB PE=1 SV=3	SRPRB	0	4	4.125	0	8	0	0	4	0	0	5.33333	1.375	yes
Serine/arginine repetitive matrix protein 2 OS=Homo sapiens OX=9606 GN=SRRM2 PE=1 SV=2	SRRM2	0	12	8.25	0	11	0	4	14	20	1.33333	12.3333	9.41667	yes
Serine/arginine-rich splicing factor 4 OS=Homo sapiens OX=9606 GN=SRSF4 PE=1 SV=2	SRSF4	3	6	6.875	2	6	10.625	0	4	4	1.66667	5.33333	7.16667	yes
Serine/arginine-rich splicing factor 9 OS=Homo sapiens OX=9606 GN=SRSF9 PE=1 SV=1	SRSF9	0	5	0	0	12	10.625	0	9	10	0	8.66667	6.875	yes
Translocon-associated protein subunit delta OS=Homo sapiens OX=9606 GN=SSR4 PE=1 SV=1	SSR4	0	2	0	0	4	4.25	0	3	3	0	3	2.41667	yes
FACT complex subunit SSRP1 OS=Homo sapiens OX=9606 GN=SSRP1 PE=1 SV=1	SSRP1	3	11	4.125	1	10	8.5	0	16	10	1.33333	12.3333	7.54167	yes
Double-stranded RNA-binding protein Staufen homolog 1 OS=Homo sapiens OX=9606 GN=STAU1 PE=1 SV=2	STAU1	0	2	0	0	10	2.125	0	15	14	0	9	5.375	yes
Stomatin-like protein 2, mitochondrial OS=Homo sapiens OX=9606 GN=STOML2 PE=1 SV=1	STOML2	0	4	0	0	4	0	0	7	8	0	5	2.66667	yes
Dolichyl-diphosphooligosaccharide--protein glycosyltransferase subunit STT3A OS=Homo sapiens OX=9606 GN=STT3A PE=1 SV=2	STT3A	0	8	5.5	0	7	2.125	0	4	6	0	6.33333	4.54167	yes
Dolichyl-diphosphooligosaccharide--protein glycosyltransferase subunit STT3B OS=Homo sapiens OX=9606 GN=STT3B PE=1 SV=1	STT3B	0	4	0	0	5	4.25	0	4	7	0	4.33333	3.75	yes
FACT complex subunit SPT16 OS=Homo sapiens OX=9606 GN=SUPT16H PE=1 SV=1	SUPT16H	2	14	8.25	0	14	14.875	0	22	15	0.666667	16.6667	12.7083	yes
TAR DNA-binding protein 43 OS=Homo sapiens OX=9606 GN=TARDBP PE=1 SV=1	TARDBP	2	4	0	1	7	6.375	0	6	6	1	5.66667	4.125	yes
Transducin beta-like protein 2 OS=Homo sapiens OX=9606 GN=TBL2 PE=1 SV=1	TBL2	0	3	0	0	8	2.125	0	5	7	0	5.33333	3.04167	yes
Transducin beta-like protein 3 OS=Homo sapiens OX=9606 GN=TBL3 PE=1 SV=2	TBL3	0	4	0	0	10	6.375	0	8	8	0	7.33333	4.79167	yes
Very-long-chain enoyl-CoA reductase OS=Homo sapiens OX=9606 GN=TECR PE=1 SV=1	TECR	0	7	2.75	0	5	0	0	3	4	0	5	2.25	yes
Calcium load-activated calcium channel OS=Homo sapiens OX=9606 GN=TMCO1 PE=1 SV=1	TMCO1	0	2	0	0	4	4.25	0	2	3	0	2.66667	2.41667	yes
Mitochondrial import receptor subunit TOM22 homolog OS=Homo sapiens OX=9606 GN=TOMM22 PE=1 SV=3	TOMM22	0	2	0	0	4	0	0	4	4	0	3.33333	1.33333	yes
Transformer-2 protein homolog alpha OS=Homo sapiens OX=9606 GN=TRA2A PE=1 SV=1	TRA2A	0	6	0	2	6	4.25	0	3	4	0.666667	5	2.75	yes
Tubulin beta chain OS=Homo sapiens OX=9606 GN=TUBB PE=1 SV=2	TUBB	5	14	15.125	0	7	6.375	0	10	10	1.66667	10.3333	10.5	yes
Tubulin beta-4B chain OS=Homo sapiens OX=9606 GN=TUBB4B PE=1 SV=1	TUBB4B	0	12	12.375	0	5	6.375	0	9	10	0	8.66667	9.58333	yes
U2 snRNP-associated SURP motif-containing protein OS=Homo sapiens OX=9606 GN=U2SURP PE=1 SV=2	U2SURP	3	8	6.875	0	13	4.25	0	12	10	1	11	7.04167	yes
Nucleolar transcription factor 1 OS=Homo sapiens OX=9606 GN=UBTF PE=1 SV=1	UBTF	0	4	0	0	7	4.25	0	8	8	0	6.33333	4.08333	yes
Cytochrome b-c1 complex subunit 1, mitochondrial OS=Homo sapiens OX=9606 GN=UQCRC1 PE=1 SV=3	UQCRC1	0	9	5.5	1	11	6.375	0	8	7	0.333333	9.33333	6.29167	yes
Cytochrome b-c1 complex subunit 2, mitochondrial OS=Homo sapiens OX=9606 GN=UQCRC2 PE=1 SV=3	UQCRC2	0	12	4.125	1	14	25.5	0	12	13	0.333333	12.6667	14.2083	yes
U4/U6.U5 tri-snRNP-associated protein 2 OS=Homo sapiens OX=9606 GN=USP39 PE=1 SV=2	USP39	0	2	0	0	15	8.5	0	10	13	0	9	7.16667	yes
Voltage-dependent anion-selective channel protein 1 OS=Homo sapiens OX=9606 GN=VDAC1 PE=1 SV=2	VDAC1	3	14	16.5	4	12	14.875	6	17	21	4.33333	14.3333	17.4583	yes
Voltage-dependent anion-selective channel protein 3 OS=Homo sapiens OX=9606 GN=VDAC3 PE=1 SV=1	VDAC3	0	4	5.5	0	3	0	0	5	6	0	4	3.83333	yes
Serine/threonine-protein kinase VRK1 OS=Homo sapiens OX=9606 GN=VRK1 PE=1 SV=1	VRK1	0	6	0	0	8	2.125	0	8	10	0	7.33333	4.04167	yes
X-ray repair cross-complementing protein 5 OS=Homo sapiens OX=9606 GN=XRCC5 PE=1 SV=3	XRCC5	0	14	5.5	0	9	10.625	0	16	14	0	13	10.0417	yes
X-ray repair cross-complementing protein 6 OS=Homo sapiens OX=9606 GN=XRCC6 PE=1 SV=2	XRCC6	0	11	6.875	2	8	8.5	0	12	7	0.666667	10.3333	7.45833	yes
5'-3' exoribonuclease 2 OS=Homo sapiens OX=9606 GN=XRN2 PE=1 SV=1	XRN2	0	5	0	0	10	6.375	0	8	10	0	7.66667	5.45833	yes
Zinc finger CCCH-type antiviral protein 1 OS=Homo sapiens OX=9606 GN=ZC3HAV1 PE=1 SV=3	ZC3HAV1	0	4	0	0	13	4.25	0	18	20	0	11.6667	8.08333	yes
Probable ATP-dependent RNA helicase DDX46 OS=Homo sapiens OX=9606 GN=DDX46 PE=1 SV=2	DDX46	5	24	15	5	24	21	4	7	3	4.66667	18.3333	13	yes
Tyrosine-protein kinase BAZ1B OS=Homo sapiens OX=9606 GN=BAZ1B PE=1 SV=2	BAZ1B	0	14	9	0	21	18	0	4	0	0	13	9	yes
Structural maintenance of chromosomes flexible hinge domain-containing protein 1 OS=Homo sapiens OX=9606 GN=SMCHD1 PE=1 SV=2	SMCHD1	0	13	9	0	23	15	0	8	0	0	14.6667	8	yes
Metastasis-associated protein MTA2 OS=Homo sapiens OX=9606 GN=MTA2 PE=1 SV=1	MTA2	0	18	13	0	18	14	0	5	0	0	13.6667	9	yes
U4/U6 small nuclear ribonucleoprotein Prp4 OS=Homo sapiens OX=9606 GN=PRPF4 PE=1 SV=2	PRPF4	0	11	9	0	11	7	0	4	0	0	8.66667	5.33333	yes
Serrate RNA effector molecule homolog OS=Homo sapiens OX=9606 GN=SRRT PE=1 SV=1	SRRT	0	14	11	0	10	6	0	4	0	0	9.33333	5.66667	yes
Zinc finger RNA-binding protein OS=Homo sapiens OX=9606 GN=ZFR PE=1 SV=2	ZFR	0	13	9	0	9	6	0	2	0	0	8	5	yes
Probable ATP-dependent RNA helicase DDX27 OS=Homo sapiens OX=9606 GN=DDX27 PE=1 SV=2	DDX27	0	7	4	0	10	6	0	3	0	0	6.66667	3.33333	yes
Cluster of Chromodomain-helicase-DNA-binding protein 4 OS=Homo sapiens OX=9606 GN=CHD4 PE=1 SV=2 (Q14839)	CHD4	0	46	23	0	46	34	0	16	3	0	36	20	yes	yes
E3 SUMO-protein ligase RanBP2 OS=Homo sapiens OX=9606 GN=RANBP2 PE=1 SV=2	RANBP2	0	25	6	0	38	32	0	12	0	0	25	12.6667	yes	yes
Inositol 1,4,5-trisphosphate receptor type 3 OS=Homo sapiens OX=9606 GN=ITPR3 PE=1 SV=2	ITPR3	0	21	0	0	29	24	0	7	0	0	19	8	yes	yes
Spectrin alpha chain, non-erythrocytic 1 OS=Homo sapiens OX=9606 GN=SPTAN1 PE=1 SV=3	SPTAN1	0	36	13	0	39	22	0	3	0	0	26	11.6667	yes	yes
Filamin-A OS=Homo sapiens OX=9606 GN=FLNA PE=1 SV=4	FLNA	0	30	4	0	26	20	2	40	12	0.666667	32	12	yes	yes
Spectrin beta chain, non-erythrocytic 1 OS=Homo sapiens OX=9606 GN=SPTBN1 PE=1 SV=2	SPTBN1	1	29	9	0	31	18	0	5	0	0.333333	21.6667	9	yes	yes
Nuclear pore complex protein Nup107 OS=Homo sapiens OX=9606 GN=NUP107 PE=1 SV=1	NUP107	0	9	2	0	26	18	0	7	0	0	14	6.66667	yes	yes
Nuclear pore complex protein Nup98-Nup96 OS=Homo sapiens OX=9606 GN=NUP98 PE=1 SV=4	NUP98	0	14	4	0	19	17	0	10	3	0	14.3333	8	yes	yes
Nuclear pore complex protein Nup133 OS=Homo sapiens OX=9606 GN=NUP133 PE=1 SV=2	NUP133	0	17	2	0	27	15	0	4	0	0	16	5.66667	yes	yes
Transcription activator BRG1 OS=Homo sapiens OX=9606 GN=SMARCA4 PE=1 SV=2	SMARCA4	0	15	2	0	22	14	0	2	0	0	13	5.33333	yes	yes
Nestin OS=Homo sapiens OX=9606 GN=NES PE=1 SV=2	NES	0	10	0	0	16	13	0	13	4	0	13	5.66667	yes	yes
Cleavage stimulation factor subunit 3 OS=Homo sapiens OX=9606 GN=CSTF3 PE=1 SV=1	CSTF3	0	18	9	0	15	11	0	3	0	0	12	6.66667	yes	yes
Structural maintenance of chromosomes protein 1A OS=Homo sapiens OX=9606 GN=SMC1A PE=1 SV=2	SMC1A	0	23	6	0	14	11	0	2	0	0	13	5.66667	yes	yes
Nuclear cap-binding protein subunit 1 OS=Homo sapiens OX=9606 GN=NCBP1 PE=1 SV=1	NCBP1	0	5	2	0	16	11	0	4	0	0	8.33333	4.33333	yes	yes
Filamin-B OS=Homo sapiens OX=9606 GN=FLNB PE=1 SV=2	FLNB	0	20	0	0	20	11	2	30	10	0.666667	23.3333	7	yes	yes
DNA topoisomerase 2-beta OS=Homo sapiens OX=9606 GN=TOP2B PE=1 SV=3	TOP2B	0	11	0	0	22	11	0	6	0	0	13	3.66667	yes	yes
MICOS complex subunit MIC60 OS=Homo sapiens OX=9606 GN=IMMT PE=1 SV=1	IMMT	1	14	6	0	12	10	0	14	5	0.333333	13.3333	7	yes	yes
Lysine-specific histone demethylase 1A OS=Homo sapiens OX=9606 GN=KDM1A PE=1 SV=2	KDM1A	0	8	4	0	16	10	0	3	0	0	9	4.66667	yes	yes
Sister chromatid cohesion protein PDS5 homolog A OS=Homo sapiens OX=9606 GN=PDS5A PE=1 SV=1	PDS5A	0	14	4	0	13	10	0	5	0	0	10.6667	4.66667	yes	yes
Exosome component 10 OS=Homo sapiens OX=9606 GN=EXOSC10 PE=1 SV=2	EXOSC10	0	16	2	0	11	8	0	2	0	0	9.66667	3.33333	yes	yes
Host cell factor 1 OS=Homo sapiens OX=9606 GN=HCFC1 PE=1 SV=2	HCFC1	0	8	2	0	16	8	0	3	0	0	9	3.33333	yes	yes
Protein ELYS OS=Homo sapiens OX=9606 GN=AHCTF1 PE=1 SV=3	AHCTF1	0	6	0	0	16	8	0	3	0	0	8.33333	2.66667	yes	yes
Sterile alpha motif domain-containing protein 9 OS=Homo sapiens OX=9606 GN=SAMD9 PE=1 SV=1	SAMD9	0	8	0	0	13	8	0	7	0	0	9.33333	2.66667	yes	yes
26S proteasome non-ATPase regulatory subunit 2 OS=Homo sapiens OX=9606 GN=PSMD2 PE=1 SV=3	PSMD2	0	11	6	0	14	7	0	4	0	0	9.66667	4.33333	yes	yes
Casein kinase II subunit alpha' OS=Homo sapiens OX=9606 GN=CSNK2A2 PE=1 SV=1	CSNK2A2	0	8	4	0	12	7	0	7	0	0	9	3.66667	yes	yes
Eukaryotic translation initiation factor 3 subunit D OS=Homo sapiens OX=9606 GN=EIF3D PE=1 SV=1	EIF3D	0	6	2	0	9	7	0	3	0	0	6	3	yes	yes
Testis-expressed protein 10 OS=Homo sapiens OX=9606 GN=TEX10 PE=1 SV=2	TEX10	0	4	0	0	11	7	0	4	0	0	6.33333	2.33333	yes	yes
DNA topoisomerase 2-alpha OS=Homo sapiens OX=9606 GN=TOP2A PE=1 SV=3	TOP2A	0	5	0	0	15	7	0	6	0	0	8.66667	2.33333	yes	yes
Neuroblast differentiation-associated protein AHNAK OS=Homo sapiens OX=9606 GN=AHNAK PE=1 SV=2	AHNAK	1	39	11	0	9	6	0	7	0	0.333333	18.3333	5.66667	yes	yes
Nuclear receptor coactivator 5 OS=Homo sapiens OX=9606 GN=NCOA5 PE=1 SV=2	NCOA5	0	8	4	0	8	6	0	3	0	0	6.33333	3.33333	yes	yes
Eukaryotic translation initiation factor 3 subunit C OS=Homo sapiens OX=9606 GN=EIF3C PE=1 SV=1	EIF3C	0	14	2	0	13	6	0	7	0	0	11.3333	2.66667	yes	yes
Nuclear RNA export factor 1 OS=Homo sapiens OX=9606 GN=NXF1 PE=1 SV=1	NXF1	0	7	2	0	10	6	0	5	0	0	7.33333	2.66667	yes	yes
Double-strand-break repair protein rad21 homolog OS=Homo sapiens OX=9606 GN=RAD21 PE=1 SV=2	RAD21	0	6	2	0	9	6	0	2	0	0	5.66667	2.66667	yes	yes
Ribonucleoprotein PTB-binding 1 OS=Homo sapiens OX=9606 GN=RAVER1 PE=1 SV=1	RAVER1	0	9	2	0	8	6	0	2	0	0	6.33333	2.66667	yes	yes
RNA-binding protein 15 OS=Homo sapiens OX=9606 GN=RBM15 PE=1 SV=2	RBM15	0	10	2	0	8	6	0	4	0	0	7.33333	2.66667	yes	yes
THO complex subunit 2 OS=Homo sapiens OX=9606 GN=THOC2 PE=1 SV=2	THOC2	0	5	2	0	11	6	0	5	0	0	7	2.66667	yes	yes
RNA helicase aquarius OS=Homo sapiens OX=9606 GN=AQR PE=1 SV=4	AQR	0	10	0	0	10	6	0	3	0	0	7.66667	2	yes	yes
ATP-dependent RNA helicase DDX42 OS=Homo sapiens OX=9606 GN=DDX42 PE=1 SV=1	DDX42	0	6	0	0	13	6	0	7	2	0	8.66667	2.66667	yes	yes
116 kDa U5 small nuclear ribonucleoprotein component OS=Homo sapiens OX=9606 GN=EFTUD2 PE=1 SV=1	EFTUD2	0	5	0	0	12	6	0	3	0	0	6.66667	2	yes	yes
Integrator complex subunit 3 OS=Homo sapiens OX=9606 GN=INTS3 PE=1 SV=1	INTS3	0	8	0	0	10	6	0	2	0	0	6.66667	2	yes	yes
Lamin-B1 OS=Homo sapiens OX=9606 GN=LMNB1 PE=1 SV=2	LMNB1	0	8	0	0	10	6	0	12	0	0	10	2	yes	yes
Exportin-1 OS=Homo sapiens OX=9606 GN=XPO1 PE=1 SV=1	XPO1	0	3	0	0	8	6	0	6	0	0	5.66667	2	yes	yes
Methyl-CpG-binding protein 2 OS=Homo sapiens OX=9606 GN=MECP2 PE=1 SV=1	MECP2	0	9	4	0	9	4	0	2	0	0	6.66667	2.66667	yes	yes
Histone-binding protein RBBP7 OS=Homo sapiens OX=9606 GN=RBBP7 PE=1 SV=1	RBBP7	0	7	4	0	8	4	0	3	0	0	6	2.66667	yes	yes
Beta-catenin-like protein 1 OS=Homo sapiens OX=9606 GN=CTNNBL1 PE=1 SV=1	CTNNBL1	0	7	2	0	7	4	0	2	0	0	5.33333	2	yes	yes
Eukaryotic translation initiation factor 4 gamma 1 OS=Homo sapiens OX=9606 GN=EIF4G1 PE=1 SV=4	EIF4G1	0	5	0	0	11	4	0	5	0	0	7	1.33333	yes	yes
pre-rRNA 2'-O-ribose RNA methyltransferase FTSJ3 OS=Homo sapiens OX=9606 GN=FTSJ3 PE=1 SV=2	FTSJ3	0	3	0	0	9	4	0	2	0	0	4.66667	1.33333	yes	yes
Cohesin subunit SA-2 OS=Homo sapiens OX=9606 GN=STAG2 PE=1 SV=3	STAG2	0	7	0	0	9	4	0	2	0	0	6	1.33333	yes	yes
Interferon-induced protein with tetratricopeptide repeats 1 OS=Homo sapiens OX=9606 GN=IFIT1 PE=1 SV=2	IFIT1	0	3	0	0	5	3	0	3	0	0	3.66667	1	yes	yes
Protein transport protein Sec24C OS=Homo sapiens OX=9606 GN=SEC24C PE=1 SV=3	SEC24C	0	6	0	0	5	3	0	11	0	0	7.33333	1	yes	yes
Signal transducer and activator of transcription 1-alpha/beta OS=Homo sapiens OX=9606 GN=STAT1 PE=1 SV=2	STAT1	0	4	0	0	5	3	0	12	5	0	7	2.66667	yes	yes
Zinc finger protein 185 OS=Homo sapiens OX=9606 GN=ZNF185 PE=1 SV=3	ZNF185	0	6	0	0	5	3	0	4	0	0	5	1	yes	yes
Cluster of Lamina-associated polypeptide 2, isoforms beta/gamma OS=Homo sapiens OX=9606 GN=TMPO PE=1 SV=2 (P42167)	TMPO	1	11	6	0	5	0	0	3	0	0.333333	6.33333	2	yes	yes
T-complex protein 1 subunit beta OS=Homo sapiens OX=9606 GN=CCT2 PE=1 SV=4	CCT2	0	6	2	0	3	0	0	7	0	0	5.33333	0.666667	yes	yes
T-complex protein 1 subunit gamma OS=Homo sapiens OX=9606 GN=CCT3 PE=1 SV=4	CCT3	0	8	2	0	2	0	0	3	0	0	4.33333	0.666667	yes	yes
RNA-binding protein 28 OS=Homo sapiens OX=9606 GN=RBM28 PE=1 SV=3	RBM28	0	5	2	0	7	0	0	2	0	0	4.66667	0.666667	yes	yes
Apoptosis-inducing factor 1, mitochondrial OS=Homo sapiens OX=9606 GN=AIFM1 PE=1 SV=1	AIFM1	0	2	0	0	2	0	0	3	0	0	2.33333	0	yes	yes
AP-2 complex subunit alpha-2 OS=Homo sapiens OX=9606 GN=4_AP2A2 PE=1 SV=2	AP2A2	0	9	0	0	8	0	0	6	0	0	7.66667	0	yes	yes
Diacylglycerol O-acyltransferase 1 OS=Homo sapiens OX=9606 GN=DGAT1 PE=1 SV=2	DGAT1	0	4	0	0	2	0	0	2	0	0	2.66667	0	yes	yes
Cytoplasmic dynein 1 heavy chain 1 OS=Homo sapiens OX=9606 GN=DYNC1H1 PE=1 SV=5	DYNC1H1	0	3	0	0	3	0	0	6	0	0	4	0	yes	yes
Hexokinase-2 OS=Homo sapiens OX=9606 GN=HK2 PE=1 SV=2	HK2	0	11	0	0	3	0	0	10	0	0	8	0	yes	yes
Ras GTPase-activating-like protein IQGAP1 OS=Homo sapiens OX=9606 GN=IQGAP1 PE=1 SV=1	IQGAP1	0	16	0	0	6	0	0	5	0	0	9	0	yes	yes
Lysine--tRNA ligase OS=Homo sapiens OX=9606 GN=KARS PE=1 SV=3	KARS	0	3	0	0	4	0	0	2	0	0	3	0	yes	yes
Interferon-induced GTP-binding protein Mx1 OS=Homo sapiens OX=9606 GN=MX1 PE=1 SV=4	MX1	0	3	0	0	3	0	0	5	0	0	3.66667	0	yes	yes
Unconventional myosin-Ib OS=Homo sapiens OX=9606 GN=MYO1B PE=1 SV=3	MYO1B	0	6	0	0	6	0	0	7	2	0	6.33333	0.666667	yes	yes
Neuropathy target esterase OS=Homo sapiens OX=9606 GN=PNPLA6 PE=1 SV=3	PNPLA6	0	2	0	0	3	0	0	3	0	0	2.66667	0	yes	yes
Suppressor of SWI4 1 homolog OS=Homo sapiens OX=9606 GN=PPAN PE=2 SV=1	PPAN	0	3	0	0	4	0	0	3	0	0	3.33333	0	yes	yes
Regulation of nuclear pre-mRNA domain-containing protein 1B OS=Homo sapiens OX=9606 GN=RPRD1B PE=1 SV=1	RPRD1B	0	5	0	0	3	0	0	2	0	0	3.33333	0	yes	yes
Splicing factor 3B subunit 2 OS=Homo sapiens OX=9606 GN=SF3B2 PE=1 SV=2	SF3B2	0	7	0	0	4	0	0	2	0	0	4.33333	0	yes	yes
Sulfide:quinone oxidoreductase, mitochondrial OS=Homo sapiens OX=9606 GN=SQOR PE=1 SV=1	SQOR	0	4	0	0	2	0	0	14	5	0	6.66667	1.66667	yes	yes
Signal recognition particle subunit SRP68 OS=Homo sapiens OX=9606 GN=SRP68 PE=1 SV=2	SRP68	0	2	0	0	3	0	0	3	0	0	2.66667	0	yes	yes
T-complex protein 1 subunit alpha OS=Homo sapiens OX=9606 GN=TCP1 PE=1 SV=1	TCP1	0	4	0	0	2	0	0	7	2	0	4.33333	0.666667	yes	yes
Protein O-mannosyl-transferase TMTC3 OS=Homo sapiens OX=9606 GN=TMTC3 PE=1 SV=2	TMTC3	0	3	0	0	2	0	0	3	0	0	2.66667	0	yes	yes
E3 ubiquitin/ISG15 ligase TRIM25 OS=Homo sapiens OX=9606 GN=TRIM25 PE=1 SV=2	TRIM25	0	2	0	0	2	0	0	2	0	0	2	0	yes	yes

## Sheet: Go
BAZ2Awt-bound with decreased association with BAZ2AWY/GA	term description	false discovery rate	matching proteins in your network (IDs)	matching proteins in your network (labels)
GO:0044403	symbiont process	2.15e-09	9606.ENSP00000044462,9606.ENSP00000216190,9606.ENSP00000229179,9606.ENSP00000245838,9606.ENSP00000261396,9606.ENSP00000283195,9606.ENSP00000309555,9606.ENSP00000316032,9606.ENSP00000317334,9606.ENSP00000318861,9606.ENSP00000323889,9606.ENSP00000325448,9606.ENSP00000327694,9606.ENSP00000354394,9606.ENSP00000358799,9606.ENSP00000360869,9606.ENSP00000384863,9606.ENSP00000395654,9606.ENSP00000416255,…	PSMA4,EIF3D,NUP107,THOC2,NUP133,RANBP2,HCFC1,NUP98,TCP1,SF3B2,TRIM25,KARS,AP2A2,STAT1,RBM15,IFIT1,XPO1,SMARCA4,EIF4G1,NXF1
GO:0044419	interspecies interaction between organisms	2.15e-09	9606.ENSP00000044462,9606.ENSP00000216190,9606.ENSP00000229179,9606.ENSP00000245838,9606.ENSP00000261396,9606.ENSP00000283195,9606.ENSP00000309555,9606.ENSP00000316032,9606.ENSP00000317334,9606.ENSP00000318861,9606.ENSP00000323889,9606.ENSP00000325448,9606.ENSP00000327694,9606.ENSP00000354394,9606.ENSP00000358799,9606.ENSP00000360869,9606.ENSP00000384863,9606.ENSP00000395535,9606.ENSP00000395654,…	PSMA4,EIF3D,NUP107,THOC2,NUP133,RANBP2,HCFC1,NUP98,TCP1,SF3B2,TRIM25,KARS,AP2A2,STAT1,RBM15,IFIT1,XPO1,MECP2,SMARCA4,EIF4G1,NXF1
GO:0006403	RNA localization	6.28e-08	9606.ENSP00000229179,9606.ENSP00000245838,9606.ENSP00000261396,9606.ENSP00000283195,9606.ENSP00000299300,9606.ENSP00000316032,9606.ENSP00000317334,9606.ENSP00000355465,9606.ENSP00000364289,9606.ENSP00000366135,9606.ENSP00000384863,9606.ENSP00000436679	NUP107,THOC2,NUP133,RANBP2,CCT2,NUP98,TCP1,AHCTF1,NCBP1,EXOSC10,XPO1,NXF1
GO:0016032	viral process	7.45e-08	9606.ENSP00000044462,9606.ENSP00000216190,9606.ENSP00000229179,9606.ENSP00000261396,9606.ENSP00000283195,9606.ENSP00000309555,9606.ENSP00000316032,9606.ENSP00000318861,9606.ENSP00000323889,9606.ENSP00000325448,9606.ENSP00000327694,9606.ENSP00000354394,9606.ENSP00000358799,9606.ENSP00000360869,9606.ENSP00000384863,9606.ENSP00000416255,9606.ENSP00000436679	PSMA4,EIF3D,NUP107,NUP133,RANBP2,HCFC1,NUP98,SF3B2,TRIM25,KARS,AP2A2,STAT1,RBM15,IFIT1,XPO1,EIF4G1,NXF1
GO:0071840	cellular component organization or biogenesis	2.34e-07	9606.ENSP00000215071,9606.ENSP00000215829,9606.ENSP00000216190,9606.ENSP00000218089,9606.ENSP00000229179,9606.ENSP00000245838,9606.ENSP00000253107,9606.ENSP00000261396,9606.ENSP00000268182,9606.ENSP00000283195,9606.ENSP00000287295,9606.ENSP00000290573,9606.ENSP00000295688,9606.ENSP00000297338,9606.ENSP00000299300,9606.ENSP00000303427,9606.ENSP00000309555,9606.ENSP00000316032,9606.ENSP00000317334,…	PSMD8,SNRPD3,EIF3D,STAG2,NUP107,THOC2,PPAN,NUP133,IQGAP1,RANBP2,AIFM1,HK2,CCT3,RAD21,CCT2,PDS5A,HCFC1,NUP98,TCP1,SMC1A,AP2A2,SEC24C,DYNC1H1,SPTBN1,CHD4,AHCTF1,FLNA,SPTAN1,ITPR3,TEX10,NCBP1,EXOSC10,AHNAK,SAMD9,RBBP7,MYO1B,MX1,KDM1A,XPO1,IMMT,MECP2,SMARCA4,FTSJ3,TOP2B,TOP2A,EIF4G1,FLNB,DGAT1
GO:0006396	RNA processing	2.38e-07	9606.ENSP00000156471,9606.ENSP00000215829,9606.ENSP00000216252,9606.ENSP00000223073,9606.ENSP00000245838,9606.ENSP00000293677,9606.ENSP00000315791,9606.ENSP00000318641,9606.ENSP00000318861,9606.ENSP00000325448,9606.ENSP00000355050,9606.ENSP00000358799,9606.ENSP00000364037,9606.ENSP00000364289,9606.ENSP00000366135,9606.ENSP00000383042,9606.ENSP00000392094,9606.ENSP00000396673,9606.ENSP00000464050	AQR,SNRPD3,PHF5A,RBM28,THOC2,RAVER1,CSTF3,INTS3,SF3B2,KARS,CTNNBL1,RBM15,TEX10,NCBP1,EXOSC10,KDM1A,EFTUD2,FTSJ3,DDX42
GO:0008380	RNA splicing	2.38e-07	9606.ENSP00000156471,9606.ENSP00000215829,9606.ENSP00000216252,9606.ENSP00000223073,9606.ENSP00000245838,9606.ENSP00000293677,9606.ENSP00000315791,9606.ENSP00000318861,9606.ENSP00000355050,9606.ENSP00000358799,9606.ENSP00000364289,9606.ENSP00000383042,9606.ENSP00000392094,9606.ENSP00000464050	AQR,SNRPD3,PHF5A,RBM28,THOC2,RAVER1,CSTF3,SF3B2,CTNNBL1,RBM15,NCBP1,KDM1A,EFTUD2,DDX42
GO:0016071	mRNA metabolic process	3.75e-07	9606.ENSP00000156471,9606.ENSP00000215829,9606.ENSP00000216252,9606.ENSP00000223073,9606.ENSP00000245838,9606.ENSP00000293677,9606.ENSP00000315791,9606.ENSP00000318861,9606.ENSP00000355050,9606.ENSP00000358799,9606.ENSP00000358866,9606.ENSP00000364289,9606.ENSP00000366135,9606.ENSP00000383042,9606.ENSP00000392094,9606.ENSP00000416255,9606.ENSP00000464050	AQR,SNRPD3,PHF5A,RBM28,THOC2,RAVER1,CSTF3,SF3B2,CTNNBL1,RBM15,FLNA,NCBP1,EXOSC10,KDM1A,EFTUD2,EIF4G1,DDX42
GO:0000398	mRNA splicing, via spliceosome	5.36e-07	9606.ENSP00000156471,9606.ENSP00000215829,9606.ENSP00000216252,9606.ENSP00000293677,9606.ENSP00000315791,9606.ENSP00000318861,9606.ENSP00000355050,9606.ENSP00000358799,9606.ENSP00000364289,9606.ENSP00000383042,9606.ENSP00000392094,9606.ENSP00000464050	AQR,SNRPD3,PHF5A,RAVER1,CSTF3,SF3B2,CTNNBL1,RBM15,NCBP1,KDM1A,EFTUD2,DDX42
GO:0006397	mRNA processing	8.79e-07	9606.ENSP00000156471,9606.ENSP00000215829,9606.ENSP00000216252,9606.ENSP00000223073,9606.ENSP00000245838,9606.ENSP00000293677,9606.ENSP00000315791,9606.ENSP00000318861,9606.ENSP00000355050,9606.ENSP00000358799,9606.ENSP00000364289,9606.ENSP00000383042,9606.ENSP00000392094,9606.ENSP00000464050	AQR,SNRPD3,PHF5A,RBM28,THOC2,RAVER1,CSTF3,SF3B2,CTNNBL1,RBM15,NCBP1,KDM1A,EFTUD2,DDX42
GO:0010467	gene expression	9.38e-07	9606.ENSP00000156471,9606.ENSP00000215829,9606.ENSP00000216190,9606.ENSP00000216252,9606.ENSP00000223073,9606.ENSP00000229179,9606.ENSP00000245838,9606.ENSP00000261396,9606.ENSP00000262506,9606.ENSP00000283195,9606.ENSP00000290231,9606.ENSP00000293677,9606.ENSP00000297338,9606.ENSP00000309555,9606.ENSP00000315791,9606.ENSP00000316032,9606.ENSP00000318641,9606.ENSP00000318861,9606.ENSP00000325448,…	AQR,SNRPD3,EIF3D,PHF5A,RBM28,NUP107,THOC2,NUP133,CSNK2A2,RANBP2,NCOA5,RAVER1,RAD21,HCFC1,CSTF3,NUP98,INTS3,SF3B2,KARS,EIF3C,CHD4,STAT1,CTNNBL1,RBM15,FLNA,RPRD1B,TEX10,NCBP1,EXOSC10,RBBP7,KDM1A,EFTUD2,MECP2,SMARCA4,FTSJ3,EIF4G1,NXF1,DDX42
GO:0051028	mRNA transport	2.03e-06	9606.ENSP00000229179,9606.ENSP00000245838,9606.ENSP00000261396,9606.ENSP00000283195,9606.ENSP00000316032,9606.ENSP00000355465,9606.ENSP00000364289,9606.ENSP00000384863,9606.ENSP00000436679	NUP107,THOC2,NUP133,RANBP2,NUP98,AHCTF1,NCBP1,XPO1,NXF1
GO:0016043	cellular component organization	5.21e-06	9606.ENSP00000215071,9606.ENSP00000215829,9606.ENSP00000216190,9606.ENSP00000218089,9606.ENSP00000229179,9606.ENSP00000245838,9606.ENSP00000253107,9606.ENSP00000261396,9606.ENSP00000268182,9606.ENSP00000283195,9606.ENSP00000287295,9606.ENSP00000290573,9606.ENSP00000295688,9606.ENSP00000297338,9606.ENSP00000299300,9606.ENSP00000303427,9606.ENSP00000309555,9606.ENSP00000316032,9606.ENSP00000317334,…	PSMD8,SNRPD3,EIF3D,STAG2,NUP107,THOC2,PPAN,NUP133,IQGAP1,RANBP2,AIFM1,HK2,CCT3,RAD21,CCT2,PDS5A,HCFC1,NUP98,TCP1,SMC1A,AP2A2,SEC24C,DYNC1H1,SPTBN1,CHD4,AHCTF1,FLNA,SPTAN1,ITPR3,NCBP1,AHNAK,SAMD9,RBBP7,MYO1B,MX1,KDM1A,IMMT,MECP2,SMARCA4,TOP2B,TOP2A,EIF4G1,FLNB,DGAT1
GO:0071426	ribonucleoprotein complex export from nucleus	7.74e-06	9606.ENSP00000229179,9606.ENSP00000245838,9606.ENSP00000261396,9606.ENSP00000283195,9606.ENSP00000316032,9606.ENSP00000364289,9606.ENSP00000384863,9606.ENSP00000436679	NUP107,THOC2,NUP133,RANBP2,NUP98,NCBP1,XPO1,NXF1
GO:0090304	nucleic acid metabolic process	1.14e-05	9606.ENSP00000156471,9606.ENSP00000215829,9606.ENSP00000216252,9606.ENSP00000223073,9606.ENSP00000245838,9606.ENSP00000262506,9606.ENSP00000290231,9606.ENSP00000293677,9606.ENSP00000297338,9606.ENSP00000303427,9606.ENSP00000309555,9606.ENSP00000315791,9606.ENSP00000316032,9606.ENSP00000318641,9606.ENSP00000318861,9606.ENSP00000323421,9606.ENSP00000323889,9606.ENSP00000325448,9606.ENSP00000349508,…	AQR,SNRPD3,PHF5A,RBM28,THOC2,CSNK2A2,NCOA5,RAVER1,RAD21,PDS5A,HCFC1,CSTF3,NUP98,INTS3,SF3B2,SMC1A,TRIM25,KARS,CHD4,STAT1,CTNNBL1,RBM15,FLNA,RPRD1B,TEX10,NCBP1,EXOSC10,RBBP7,KDM1A,EFTUD2,MECP2,SMARCA4,FTSJ3,TOP2B,TOP2A,EIF4G1,DDX42
GO:0051128	regulation of cellular component organization	1.55e-05	9606.ENSP00000157812,9606.ENSP00000218089,9606.ENSP00000245838,9606.ENSP00000268182,9606.ENSP00000283195,9606.ENSP00000287295,9606.ENSP00000290573,9606.ENSP00000295688,9606.ENSP00000297338,9606.ENSP00000299300,9606.ENSP00000309555,9606.ENSP00000317334,9606.ENSP00000323421,9606.ENSP00000348965,9606.ENSP00000349259,9606.ENSP00000357206,9606.ENSP00000358866,9606.ENSP00000361824,9606.ENSP00000364289,…	PSMC4,STAG2,THOC2,IQGAP1,RANBP2,AIFM1,HK2,CCT3,RAD21,CCT2,HCFC1,TCP1,SMC1A,DYNC1H1,SPTBN1,NES,FLNA,SPTAN1,NCBP1,EXOSC10,RBBP7,KDM1A,XPO1,MECP2,SMARCA4,TOP2A,EIF4G1
GO:1905216	positive regulation of RNA binding	1.55e-05	9606.ENSP00000216190,9606.ENSP00000332604,9606.ENSP00000364289,9606.ENSP00000416255	EIF3D,EIF3C,NCBP1,EIF4G1
GO:0034622	cellular protein-containing complex assembly	1.72e-05	9606.ENSP00000215071,9606.ENSP00000215829,9606.ENSP00000216190,9606.ENSP00000229179,9606.ENSP00000253107,9606.ENSP00000287295,9606.ENSP00000299300,9606.ENSP00000316032,9606.ENSP00000317334,9606.ENSP00000343405,9606.ENSP00000348965,9606.ENSP00000355465,9606.ENSP00000364289,9606.ENSP00000369424,9606.ENSP00000381601,9606.ENSP00000395654	PSMD8,SNRPD3,EIF3D,NUP107,PPAN,AIFM1,CCT2,NUP98,TCP1,SEC24C,DYNC1H1,AHCTF1,NCBP1,RBBP7,MX1,SMARCA4
GO:0006139	nucleobase-containing compound metabolic process	2.96e-05	9606.ENSP00000156471,9606.ENSP00000215829,9606.ENSP00000216252,9606.ENSP00000223073,9606.ENSP00000245838,9606.ENSP00000262506,9606.ENSP00000290231,9606.ENSP00000290573,9606.ENSP00000293677,9606.ENSP00000297338,9606.ENSP00000303427,9606.ENSP00000309555,9606.ENSP00000315791,9606.ENSP00000316032,9606.ENSP00000318641,9606.ENSP00000318861,9606.ENSP00000323421,9606.ENSP00000323889,9606.ENSP00000325448,…	AQR,SNRPD3,PHF5A,RBM28,THOC2,CSNK2A2,NCOA5,HK2,RAVER1,RAD21,PDS5A,HCFC1,CSTF3,NUP98,INTS3,SF3B2,SMC1A,TRIM25,KARS,CHD4,STAT1,CTNNBL1,RBM15,FLNA,RPRD1B,TEX10,NCBP1,EXOSC10,RBBP7,KDM1A,EFTUD2,MECP2,SMARCA4,FTSJ3,TOP2B,TOP2A,EIF4G1,DDX42,DGAT1
GO:0006406	mRNA export from nucleus	2.96e-05	9606.ENSP00000229179,9606.ENSP00000245838,9606.ENSP00000261396,9606.ENSP00000283195,9606.ENSP00000316032,9606.ENSP00000364289,9606.ENSP00000436679	NUP107,THOC2,NUP133,RANBP2,NUP98,NCBP1,NXF1
GO:0044085	cellular component biogenesis	2.96e-05	9606.ENSP00000215071,9606.ENSP00000215829,9606.ENSP00000216190,9606.ENSP00000229179,9606.ENSP00000253107,9606.ENSP00000287295,9606.ENSP00000295688,9606.ENSP00000299300,9606.ENSP00000316032,9606.ENSP00000317334,9606.ENSP00000343405,9606.ENSP00000348965,9606.ENSP00000349259,9606.ENSP00000355465,9606.ENSP00000358866,9606.ENSP00000363435,9606.ENSP00000364037,9606.ENSP00000364289,9606.ENSP00000366135,…	PSMD8,SNRPD3,EIF3D,NUP107,PPAN,AIFM1,CCT3,CCT2,NUP98,TCP1,SEC24C,DYNC1H1,SPTBN1,AHCTF1,FLNA,ITPR3,TEX10,NCBP1,EXOSC10,AHNAK,RBBP7,MYO1B,MX1,XPO1,MECP2,SMARCA4,FTSJ3,DGAT1
GO:0006996	organelle organization	4.01e-05	9606.ENSP00000218089,9606.ENSP00000229179,9606.ENSP00000253107,9606.ENSP00000261396,9606.ENSP00000283195,9606.ENSP00000287295,9606.ENSP00000290573,9606.ENSP00000297338,9606.ENSP00000303427,9606.ENSP00000309555,9606.ENSP00000316032,9606.ENSP00000323421,9606.ENSP00000343405,9606.ENSP00000348965,9606.ENSP00000349259,9606.ENSP00000349508,9606.ENSP00000355465,9606.ENSP00000358866,9606.ENSP00000361824,…	STAG2,NUP107,PPAN,NUP133,RANBP2,AIFM1,HK2,RAD21,PDS5A,HCFC1,NUP98,SMC1A,SEC24C,DYNC1H1,SPTBN1,CHD4,AHCTF1,FLNA,SPTAN1,SAMD9,RBBP7,MYO1B,MX1,KDM1A,IMMT,MECP2,SMARCA4,TOP2B,TOP2A,EIF4G1,FLNB
GO:0033043	regulation of organelle organization	4.19e-05	9606.ENSP00000218089,9606.ENSP00000283195,9606.ENSP00000290573,9606.ENSP00000295688,9606.ENSP00000297338,9606.ENSP00000299300,9606.ENSP00000317334,9606.ENSP00000323421,9606.ENSP00000348965,9606.ENSP00000349259,9606.ENSP00000357206,9606.ENSP00000358866,9606.ENSP00000361824,9606.ENSP00000366135,9606.ENSP00000383042,9606.ENSP00000384863,9606.ENSP00000395535,9606.ENSP00000411532	STAG2,RANBP2,HK2,CCT3,RAD21,CCT2,TCP1,SMC1A,DYNC1H1,SPTBN1,NES,FLNA,SPTAN1,EXOSC10,KDM1A,XPO1,MECP2,TOP2A
GO:0006999	nuclear pore organization	5.26e-05	9606.ENSP00000229179,9606.ENSP00000261396,9606.ENSP00000316032,9606.ENSP00000355465	NUP107,NUP133,NUP98,AHCTF1
GO:0051704	multi-organism process	5.81e-05	9606.ENSP00000044462,9606.ENSP00000216190,9606.ENSP00000229179,9606.ENSP00000245838,9606.ENSP00000261396,9606.ENSP00000262506,9606.ENSP00000283195,9606.ENSP00000295688,9606.ENSP00000299300,9606.ENSP00000309555,9606.ENSP00000316032,9606.ENSP00000317334,9606.ENSP00000318861,9606.ENSP00000323889,9606.ENSP00000325448,9606.ENSP00000327694,9606.ENSP00000354394,9606.ENSP00000358799,9606.ENSP00000360869,…	PSMA4,EIF3D,NUP107,THOC2,NUP133,CSNK2A2,RANBP2,CCT3,CCT2,HCFC1,NUP98,TCP1,SF3B2,TRIM25,KARS,AP2A2,STAT1,RBM15,IFIT1,MX1,XPO1,MECP2,SMARCA4,TOP2A,EIF4G1,FLNB,NXF1
GO:0034641	cellular nitrogen compound metabolic process	5.92e-05	9606.ENSP00000156471,9606.ENSP00000215829,9606.ENSP00000216190,9606.ENSP00000216252,9606.ENSP00000223073,9606.ENSP00000245838,9606.ENSP00000262506,9606.ENSP00000290231,9606.ENSP00000290573,9606.ENSP00000293677,9606.ENSP00000297338,9606.ENSP00000303427,9606.ENSP00000309555,9606.ENSP00000315791,9606.ENSP00000316032,9606.ENSP00000318641,9606.ENSP00000318861,9606.ENSP00000323421,9606.ENSP00000323889,…	AQR,SNRPD3,EIF3D,PHF5A,RBM28,THOC2,CSNK2A2,NCOA5,HK2,RAVER1,RAD21,PDS5A,HCFC1,CSTF3,NUP98,INTS3,SF3B2,SMC1A,TRIM25,KARS,EIF3C,CHD4,STAT1,CTNNBL1,RBM15,FLNA,RPRD1B,TEX10,NCBP1,EXOSC10,RBBP7,KDM1A,EFTUD2,MECP2,SMARCA4,FTSJ3,TOP2B,TOP2A,EIF4G1,DDX42,DGAT1
GO:0046931	pore complex assembly	5.92e-05	9606.ENSP00000229179,9606.ENSP00000295688,9606.ENSP00000316032,9606.ENSP00000355465	NUP107,CCT3,NUP98,AHCTF1
GO:0006913	nucleocytoplasmic transport	7.28e-05	9606.ENSP00000215829,9606.ENSP00000229179,9606.ENSP00000245838,9606.ENSP00000261396,9606.ENSP00000283195,9606.ENSP00000316032,9606.ENSP00000364289,9606.ENSP00000384863,9606.ENSP00000436679	SNRPD3,NUP107,THOC2,NUP133,RANBP2,NUP98,NCBP1,XPO1,NXF1
GO:0065003	protein-containing complex assembly	9.13e-05	9606.ENSP00000215071,9606.ENSP00000215829,9606.ENSP00000216190,9606.ENSP00000229179,9606.ENSP00000253107,9606.ENSP00000287295,9606.ENSP00000295688,9606.ENSP00000299300,9606.ENSP00000316032,9606.ENSP00000317334,9606.ENSP00000343405,9606.ENSP00000348965,9606.ENSP00000355465,9606.ENSP00000363435,9606.ENSP00000364289,9606.ENSP00000367263,9606.ENSP00000369424,9606.ENSP00000381601,9606.ENSP00000395654,…	PSMD8,SNRPD3,EIF3D,NUP107,PPAN,AIFM1,CCT3,CCT2,NUP98,TCP1,SEC24C,DYNC1H1,AHCTF1,ITPR3,NCBP1,AHNAK,RBBP7,MX1,SMARCA4,DGAT1
GO:0051726	regulation of cell cycle	0.00011	9606.ENSP00000218089,9606.ENSP00000262506,9606.ENSP00000268182,9606.ENSP00000283195,9606.ENSP00000297338,9606.ENSP00000309555,9606.ENSP00000318641,9606.ENSP00000323421,9606.ENSP00000348965,9606.ENSP00000355465,9606.ENSP00000362532,9606.ENSP00000369424,9606.ENSP00000384863,9606.ENSP00000395535,9606.ENSP00000396704,9606.ENSP00000411532,9606.ENSP00000416255	STAG2,CSNK2A2,IQGAP1,RANBP2,RAD21,HCFC1,INTS3,SMC1A,DYNC1H1,AHCTF1,RPRD1B,RBBP7,XPO1,MECP2,TOP2B,TOP2A,EIF4G1
GO:0010556	regulation of macromolecule biosynthetic process	0.00016	9606.ENSP00000157812,9606.ENSP00000216190,9606.ENSP00000216252,9606.ENSP00000218089,9606.ENSP00000229179,9606.ENSP00000261396,9606.ENSP00000262506,9606.ENSP00000266732,9606.ENSP00000290231,9606.ENSP00000295688,9606.ENSP00000297338,9606.ENSP00000299300,9606.ENSP00000303427,9606.ENSP00000309555,9606.ENSP00000316032,9606.ENSP00000317334,9606.ENSP00000323421,9606.ENSP00000323889,9606.ENSP00000325448,…	PSMC4,EIF3D,PHF5A,STAG2,NUP107,NUP133,CSNK2A2,TMPO,NCOA5,CCT3,RAD21,CCT2,PDS5A,HCFC1,NUP98,TCP1,SMC1A,TRIM25,KARS,EIF3C,CHD4,STAT1,AHCTF1,RBM15,FLNA,RPRD1B,NCBP1,EXOSC10,RBBP7,KDM1A,XPO1,MECP2,SMARCA4,TOP2A,EIF4G1
GO:0019219	regulation of nucleobase-containing compound metabolic process	0.00016	9606.ENSP00000157812,9606.ENSP00000216252,9606.ENSP00000218089,9606.ENSP00000229179,9606.ENSP00000261396,9606.ENSP00000262506,9606.ENSP00000266732,9606.ENSP00000287295,9606.ENSP00000290231,9606.ENSP00000295688,9606.ENSP00000297338,9606.ENSP00000299300,9606.ENSP00000303427,9606.ENSP00000309555,9606.ENSP00000316032,9606.ENSP00000317334,9606.ENSP00000323421,9606.ENSP00000323889,9606.ENSP00000325448,…	PSMC4,PHF5A,STAG2,NUP107,NUP133,CSNK2A2,TMPO,AIFM1,NCOA5,CCT3,RAD21,CCT2,PDS5A,HCFC1,NUP98,TCP1,SMC1A,TRIM25,KARS,CHD4,STAT1,AHCTF1,RBM15,FLNA,RPRD1B,NCBP1,EXOSC10,AHNAK,RBBP7,KDM1A,XPO1,MECP2,SMARCA4,TOP2A,EIF4G1
GO:0051052	regulation of DNA metabolic process	0.00016	9606.ENSP00000218089,9606.ENSP00000287295,9606.ENSP00000295688,9606.ENSP00000299300,9606.ENSP00000303427,9606.ENSP00000317334,9606.ENSP00000323421,9606.ENSP00000366135,9606.ENSP00000383042,9606.ENSP00000395535	STAG2,AIFM1,CCT3,CCT2,PDS5A,TCP1,SMC1A,EXOSC10,KDM1A,MECP2
GO:0016070	RNA metabolic process	0.00019	9606.ENSP00000156471,9606.ENSP00000215829,9606.ENSP00000216252,9606.ENSP00000223073,9606.ENSP00000245838,9606.ENSP00000262506,9606.ENSP00000290231,9606.ENSP00000293677,9606.ENSP00000297338,9606.ENSP00000309555,9606.ENSP00000315791,9606.ENSP00000318641,9606.ENSP00000318861,9606.ENSP00000325448,9606.ENSP00000349508,9606.ENSP00000354394,9606.ENSP00000355050,9606.ENSP00000358799,9606.ENSP00000358866,…	AQR,SNRPD3,PHF5A,RBM28,THOC2,CSNK2A2,NCOA5,RAVER1,RAD21,HCFC1,CSTF3,INTS3,SF3B2,KARS,CHD4,STAT1,CTNNBL1,RBM15,FLNA,RPRD1B,TEX10,NCBP1,EXOSC10,RBBP7,KDM1A,EFTUD2,MECP2,SMARCA4,FTSJ3,EIF4G1,DDX42
GO:0043170	macromolecule metabolic process	0.00022	9606.ENSP00000044462,9606.ENSP00000156471,9606.ENSP00000157812,9606.ENSP00000215071,9606.ENSP00000215829,9606.ENSP00000216190,9606.ENSP00000216252,9606.ENSP00000223073,9606.ENSP00000229179,9606.ENSP00000245838,9606.ENSP00000261396,9606.ENSP00000262506,9606.ENSP00000283195,9606.ENSP00000290231,9606.ENSP00000293677,9606.ENSP00000297338,9606.ENSP00000303427,9606.ENSP00000309555,9606.ENSP00000310129,…	PSMA4,AQR,PSMC4,PSMD8,SNRPD3,EIF3D,PHF5A,RBM28,NUP107,THOC2,NUP133,CSNK2A2,RANBP2,NCOA5,RAVER1,RAD21,PDS5A,HCFC1,PSMD2,CSTF3,NUP98,INTS3,SF3B2,SMC1A,TRIM25,KARS,AP2A2,EIF3C,SPTBN1,CHD4,STAT1,CTNNBL1,RBM15,FLNA,SPTAN1,RPRD1B,TEX10,NCBP1,EXOSC10,RBBP7,KDM1A,EFTUD2,MECP2,SMARCA4,FTSJ3,TOP2B,TOP2A,EIF4G1,NXF1,DDX42
GO:0043933	protein-containing complex subunit organization	0.00022	9606.ENSP00000215071,9606.ENSP00000215829,9606.ENSP00000216190,9606.ENSP00000229179,9606.ENSP00000253107,9606.ENSP00000261396,9606.ENSP00000287295,9606.ENSP00000295688,9606.ENSP00000299300,9606.ENSP00000316032,9606.ENSP00000317334,9606.ENSP00000343405,9606.ENSP00000348965,9606.ENSP00000355465,9606.ENSP00000363435,9606.ENSP00000364289,9606.ENSP00000367263,9606.ENSP00000369424,9606.ENSP00000381601,…	PSMD8,SNRPD3,EIF3D,NUP107,PPAN,NUP133,AIFM1,CCT3,CCT2,NUP98,TCP1,SEC24C,DYNC1H1,AHCTF1,ITPR3,NCBP1,AHNAK,RBBP7,MX1,SMARCA4,DGAT1
GO:0033036	macromolecule localization	0.00025	9606.ENSP00000229179,9606.ENSP00000245838,9606.ENSP00000261396,9606.ENSP00000283195,9606.ENSP00000290573,9606.ENSP00000297338,9606.ENSP00000299300,9606.ENSP00000312066,9606.ENSP00000316032,9606.ENSP00000317334,9606.ENSP00000327694,9606.ENSP00000343405,9606.ENSP00000349259,9606.ENSP00000355465,9606.ENSP00000358866,9606.ENSP00000360869,9606.ENSP00000364289,9606.ENSP00000366135,9606.ENSP00000384863,…	NUP107,THOC2,NUP133,RANBP2,HK2,RAD21,CCT2,SRP68,NUP98,TCP1,AP2A2,SEC24C,SPTBN1,AHCTF1,FLNA,IFIT1,NCBP1,EXOSC10,XPO1,MECP2,FLNB,NXF1,DDX42,DGAT1
GO:2000112	regulation of cellular macromolecule biosynthetic process	0.00025	9606.ENSP00000157812,9606.ENSP00000216190,9606.ENSP00000216252,9606.ENSP00000218089,9606.ENSP00000229179,9606.ENSP00000261396,9606.ENSP00000262506,9606.ENSP00000266732,9606.ENSP00000290231,9606.ENSP00000295688,9606.ENSP00000297338,9606.ENSP00000299300,9606.ENSP00000303427,9606.ENSP00000309555,9606.ENSP00000317334,9606.ENSP00000323421,9606.ENSP00000323889,9606.ENSP00000325448,9606.ENSP00000332604,…	PSMC4,EIF3D,PHF5A,STAG2,NUP107,NUP133,CSNK2A2,TMPO,NCOA5,CCT3,RAD21,CCT2,PDS5A,HCFC1,TCP1,SMC1A,TRIM25,KARS,EIF3C,CHD4,STAT1,AHCTF1,RBM15,FLNA,RPRD1B,NCBP1,EXOSC10,RBBP7,KDM1A,XPO1,MECP2,SMARCA4,TOP2A,EIF4G1
GO:0000972	transcription-dependent tethering of RNA polymerase II gene DNA at nuclear periphery	0.00027	9606.ENSP00000229179,9606.ENSP00000261396,9606.ENSP00000316032	NUP107,NUP133,NUP98
GO:0031326	regulation of cellular biosynthetic process	0.00027	9606.ENSP00000157812,9606.ENSP00000216190,9606.ENSP00000216252,9606.ENSP00000218089,9606.ENSP00000229179,9606.ENSP00000261396,9606.ENSP00000262506,9606.ENSP00000266732,9606.ENSP00000290231,9606.ENSP00000295688,9606.ENSP00000297338,9606.ENSP00000299300,9606.ENSP00000303427,9606.ENSP00000309555,9606.ENSP00000316032,9606.ENSP00000317334,9606.ENSP00000323421,9606.ENSP00000323889,9606.ENSP00000325448,…	PSMC4,EIF3D,PHF5A,STAG2,NUP107,NUP133,CSNK2A2,TMPO,NCOA5,CCT3,RAD21,CCT2,PDS5A,HCFC1,NUP98,TCP1,SMC1A,TRIM25,KARS,EIF3C,CHD4,STAT1,AHCTF1,RBM15,FLNA,RPRD1B,NCBP1,EXOSC10,RBBP7,KDM1A,XPO1,MECP2,SMARCA4,TOP2A,EIF4G1
GO:1904872	regulation of telomerase RNA localization to Cajal body	0.00027	9606.ENSP00000299300,9606.ENSP00000317334,9606.ENSP00000366135	CCT2,TCP1,EXOSC10
GO:0070727	cellular macromolecule localization	0.00028	9606.ENSP00000229179,9606.ENSP00000245838,9606.ENSP00000261396,9606.ENSP00000283195,9606.ENSP00000290573,9606.ENSP00000297338,9606.ENSP00000312066,9606.ENSP00000316032,9606.ENSP00000327694,9606.ENSP00000343405,9606.ENSP00000349259,9606.ENSP00000358866,9606.ENSP00000360869,9606.ENSP00000364289,9606.ENSP00000366135,9606.ENSP00000384863,9606.ENSP00000420213,9606.ENSP00000436679	NUP107,THOC2,NUP133,RANBP2,HK2,RAD21,SRP68,NUP98,AP2A2,SEC24C,SPTBN1,FLNA,IFIT1,NCBP1,EXOSC10,XPO1,FLNB,NXF1
GO:0044766	multi-organism transport	0.00036	9606.ENSP00000245838,9606.ENSP00000317334,9606.ENSP00000360869,9606.ENSP00000384863	THOC2,TCP1,IFIT1,XPO1
GO:0051276	chromosome organization	0.00036	9606.ENSP00000218089,9606.ENSP00000229179,9606.ENSP00000261396,9606.ENSP00000287295,9606.ENSP00000303427,9606.ENSP00000309555,9606.ENSP00000316032,9606.ENSP00000323421,9606.ENSP00000349508,9606.ENSP00000369424,9606.ENSP00000383042,9606.ENSP00000395535,9606.ENSP00000395654,9606.ENSP00000396704,9606.ENSP00000411532	STAG2,NUP107,NUP133,AIFM1,PDS5A,HCFC1,NUP98,SMC1A,CHD4,RBBP7,KDM1A,MECP2,SMARCA4,TOP2B,TOP2A
GO:1902416	positive regulation of mRNA binding	0.00036	9606.ENSP00000216190,9606.ENSP00000332604,9606.ENSP00000416255	EIF3D,EIF3C,EIF4G1
GO:0022607	cellular component assembly	0.00037	9606.ENSP00000215071,9606.ENSP00000215829,9606.ENSP00000216190,9606.ENSP00000229179,9606.ENSP00000253107,9606.ENSP00000287295,9606.ENSP00000295688,9606.ENSP00000299300,9606.ENSP00000316032,9606.ENSP00000317334,9606.ENSP00000343405,9606.ENSP00000348965,9606.ENSP00000349259,9606.ENSP00000355465,9606.ENSP00000358866,9606.ENSP00000363435,9606.ENSP00000364289,9606.ENSP00000367263,9606.ENSP00000369424,…	PSMD8,SNRPD3,EIF3D,NUP107,PPAN,AIFM1,CCT3,CCT2,NUP98,TCP1,SEC24C,DYNC1H1,SPTBN1,AHCTF1,FLNA,ITPR3,NCBP1,AHNAK,RBBP7,MYO1B,MX1,MECP2,SMARCA4,DGAT1
GO:0009987	cellular process	0.00047	9606.ENSP00000044462,9606.ENSP00000156471,9606.ENSP00000157812,9606.ENSP00000215071,9606.ENSP00000215829,9606.ENSP00000216190,9606.ENSP00000216252,9606.ENSP00000218089,9606.ENSP00000223073,9606.ENSP00000229179,9606.ENSP00000245838,9606.ENSP00000253107,9606.ENSP00000260324,9606.ENSP00000261366,9606.ENSP00000261396,9606.ENSP00000262506,9606.ENSP00000266712,9606.ENSP00000268182,9606.ENSP00000283195,…	PSMA4,AQR,PSMC4,PSMD8,SNRPD3,EIF3D,PHF5A,STAG2,RBM28,NUP107,THOC2,PPAN,SQRDL,LMNB1,NUP133,CSNK2A2,TMTC3,IQGAP1,RANBP2,AIFM1,NCOA5,HK2,RAVER1,CCT3,RAD21,CCT2,PDS5A,HCFC1,PSMD2,CSTF3,NUP98,TCP1,INTS3,SF3B2,SMC1A,TRIM25,KARS,AP2A2,EIF3C,SEC24C,DYNC1H1,SPTBN1,CHD4,STAT1,CTNNBL1,AHCTF1,NES,RBM15,FLNA,IFIT1,SPTAN1,RPRD1B,ITPR3,TEX10,NCBP1,EXOSC10,AHNAK,SAMD9,RBBP7,MYO1B,MX1,KDM1A,IMMT,EFTUD2,MECP2,SMAR…
GO:0010638	positive regulation of organelle organization	0.00047	9606.ENSP00000283195,9606.ENSP00000290573,9606.ENSP00000295688,9606.ENSP00000297338,9606.ENSP00000299300,9606.ENSP00000317334,9606.ENSP00000348965,9606.ENSP00000357206,9606.ENSP00000358866,9606.ENSP00000383042,9606.ENSP00000395535	RANBP2,HK2,CCT3,RAD21,CCT2,TCP1,DYNC1H1,NES,FLNA,KDM1A,MECP2
GO:0051292	nuclear pore complex assembly	0.00054	9606.ENSP00000229179,9606.ENSP00000316032,9606.ENSP00000355465	NUP107,NUP98,AHCTF1
GO:1903047	mitotic cell cycle process	0.00054	9606.ENSP00000283195,9606.ENSP00000303427,9606.ENSP00000318641,9606.ENSP00000323421,9606.ENSP00000348965,9606.ENSP00000349259,9606.ENSP00000357206,9606.ENSP00000358866,9606.ENSP00000395535,9606.ENSP00000396704,9606.ENSP00000411532	RANBP2,PDS5A,INTS3,SMC1A,DYNC1H1,SPTBN1,NES,FLNA,MECP2,TOP2B,TOP2A
GO:1904851	positive regulation of establishment of protein localization to telomere	0.00054	9606.ENSP00000295688,9606.ENSP00000299300,9606.ENSP00000317334	CCT3,CCT2,TCP1
GO:0010564	regulation of cell cycle process	0.00061	9606.ENSP00000218089,9606.ENSP00000262506,9606.ENSP00000283195,9606.ENSP00000297338,9606.ENSP00000323421,9606.ENSP00000348965,9606.ENSP00000355465,9606.ENSP00000362532,9606.ENSP00000369424,9606.ENSP00000384863,9606.ENSP00000395535,9606.ENSP00000416255	STAG2,CSNK2A2,RANBP2,RAD21,SMC1A,DYNC1H1,AHCTF1,RPRD1B,RBBP7,XPO1,MECP2,EIF4G1
GO:0051493	regulation of cytoskeleton organization	0.00071	9606.ENSP00000218089,9606.ENSP00000283195,9606.ENSP00000323421,9606.ENSP00000348965,9606.ENSP00000349259,9606.ENSP00000357206,9606.ENSP00000358866,9606.ENSP00000361824,9606.ENSP00000384863,9606.ENSP00000395535	STAG2,RANBP2,SMC1A,DYNC1H1,SPTBN1,NES,FLNA,SPTAN1,XPO1,MECP2
GO:0008104	protein localization	0.00074	9606.ENSP00000229179,9606.ENSP00000245838,9606.ENSP00000261396,9606.ENSP00000283195,9606.ENSP00000290573,9606.ENSP00000297338,9606.ENSP00000312066,9606.ENSP00000316032,9606.ENSP00000317334,9606.ENSP00000327694,9606.ENSP00000343405,9606.ENSP00000349259,9606.ENSP00000355465,9606.ENSP00000358866,9606.ENSP00000360869,9606.ENSP00000364289,9606.ENSP00000384863,9606.ENSP00000395535,9606.ENSP00000420213,…	NUP107,THOC2,NUP133,RANBP2,HK2,RAD21,SRP68,NUP98,TCP1,AP2A2,SEC24C,SPTBN1,AHCTF1,FLNA,IFIT1,NCBP1,XPO1,MECP2,FLNB,NXF1,DDX42
GO:0034613	cellular protein localization	0.00078	9606.ENSP00000229179,9606.ENSP00000245838,9606.ENSP00000261396,9606.ENSP00000283195,9606.ENSP00000290573,9606.ENSP00000297338,9606.ENSP00000312066,9606.ENSP00000316032,9606.ENSP00000327694,9606.ENSP00000343405,9606.ENSP00000349259,9606.ENSP00000358866,9606.ENSP00000360869,9606.ENSP00000364289,9606.ENSP00000384863,9606.ENSP00000420213,9606.ENSP00000436679	NUP107,THOC2,NUP133,RANBP2,HK2,RAD21,SRP68,NUP98,AP2A2,SEC24C,SPTBN1,FLNA,IFIT1,NCBP1,XPO1,FLNB,NXF1
GO:0007346	regulation of mitotic cell cycle	0.00096	9606.ENSP00000218089,9606.ENSP00000268182,9606.ENSP00000283195,9606.ENSP00000297338,9606.ENSP00000318641,9606.ENSP00000323421,9606.ENSP00000348965,9606.ENSP00000395535,9606.ENSP00000396704,9606.ENSP00000411532,9606.ENSP00000416255	STAG2,IQGAP1,RANBP2,RAD21,INTS3,SMC1A,DYNC1H1,MECP2,TOP2B,TOP2A,EIF4G1
GO:0051641	cellular localization	0.001	9606.ENSP00000215829,9606.ENSP00000229179,9606.ENSP00000245838,9606.ENSP00000261396,9606.ENSP00000283195,9606.ENSP00000290573,9606.ENSP00000297338,9606.ENSP00000312066,9606.ENSP00000316032,9606.ENSP00000327694,9606.ENSP00000343405,9606.ENSP00000348965,9606.ENSP00000349259,9606.ENSP00000358866,9606.ENSP00000360869,9606.ENSP00000361824,9606.ENSP00000363435,9606.ENSP00000364289,9606.ENSP00000366135,…	SNRPD3,NUP107,THOC2,NUP133,RANBP2,HK2,RAD21,SRP68,NUP98,AP2A2,SEC24C,DYNC1H1,SPTBN1,FLNA,IFIT1,SPTAN1,ITPR3,NCBP1,EXOSC10,XPO1,FLNB,NXF1
GO:0007049	cell cycle	0.0011	9606.ENSP00000218089,9606.ENSP00000262506,9606.ENSP00000283195,9606.ENSP00000297338,9606.ENSP00000303427,9606.ENSP00000309555,9606.ENSP00000318641,9606.ENSP00000323421,9606.ENSP00000348965,9606.ENSP00000349259,9606.ENSP00000355465,9606.ENSP00000357206,9606.ENSP00000358866,9606.ENSP00000395535,9606.ENSP00000396704,9606.ENSP00000411532	STAG2,CSNK2A2,RANBP2,RAD21,PDS5A,HCFC1,INTS3,SMC1A,DYNC1H1,SPTBN1,AHCTF1,NES,FLNA,MECP2,TOP2B,TOP2A
GO:0033044	regulation of chromosome organization	0.0011	9606.ENSP00000295688,9606.ENSP00000297338,9606.ENSP00000299300,9606.ENSP00000317334,9606.ENSP00000366135,9606.ENSP00000383042,9606.ENSP00000395535,9606.ENSP00000411532	CCT3,RAD21,CCT2,TCP1,EXOSC10,KDM1A,MECP2,TOP2A
GO:0022613	ribonucleoprotein complex biogenesis	0.0012	9606.ENSP00000215829,9606.ENSP00000216190,9606.ENSP00000253107,9606.ENSP00000348965,9606.ENSP00000364037,9606.ENSP00000364289,9606.ENSP00000366135,9606.ENSP00000384863,9606.ENSP00000396673	SNRPD3,EIF3D,PPAN,DYNC1H1,TEX10,NCBP1,EXOSC10,XPO1,FTSJ3
GO:0022402	cell cycle process	0.0014	9606.ENSP00000218089,9606.ENSP00000283195,9606.ENSP00000297338,9606.ENSP00000303427,9606.ENSP00000318641,9606.ENSP00000323421,9606.ENSP00000348965,9606.ENSP00000349259,9606.ENSP00000357206,9606.ENSP00000358866,9606.ENSP00000395535,9606.ENSP00000396704,9606.ENSP00000411532	STAG2,RANBP2,RAD21,PDS5A,INTS3,SMC1A,DYNC1H1,SPTBN1,NES,FLNA,MECP2,TOP2B,TOP2A
GO:2001252	positive regulation of chromosome organization	0.0014	9606.ENSP00000295688,9606.ENSP00000297338,9606.ENSP00000299300,9606.ENSP00000317334,9606.ENSP00000383042,9606.ENSP00000395535	CCT3,RAD21,CCT2,TCP1,KDM1A,MECP2
GO:0045184	establishment of protein localization	0.0017	9606.ENSP00000229179,9606.ENSP00000245838,9606.ENSP00000261396,9606.ENSP00000283195,9606.ENSP00000290573,9606.ENSP00000312066,9606.ENSP00000316032,9606.ENSP00000317334,9606.ENSP00000327694,9606.ENSP00000343405,9606.ENSP00000349259,9606.ENSP00000355465,9606.ENSP00000358866,9606.ENSP00000360869,9606.ENSP00000364289,9606.ENSP00000384863,9606.ENSP00000436679	NUP107,THOC2,NUP133,RANBP2,HK2,SRP68,NUP98,TCP1,AP2A2,SEC24C,SPTBN1,AHCTF1,FLNA,IFIT1,NCBP1,XPO1,NXF1
GO:0032210	regulation of telomere maintenance via telomerase	0.002	9606.ENSP00000295688,9606.ENSP00000299300,9606.ENSP00000317334,9606.ENSP00000366135	CCT3,CCT2,TCP1,EXOSC10
GO:0050792	regulation of viral process	0.002	9606.ENSP00000323889,9606.ENSP00000354394,9606.ENSP00000360869,9606.ENSP00000381601,9606.ENSP00000395654,9606.ENSP00000411532	TRIM25,STAT1,IFIT1,MX1,SMARCA4,TOP2A
GO:0051171	regulation of nitrogen compound metabolic process	0.002	9606.ENSP00000157812,9606.ENSP00000216190,9606.ENSP00000216252,9606.ENSP00000218089,9606.ENSP00000229179,9606.ENSP00000261396,9606.ENSP00000262506,9606.ENSP00000266712,9606.ENSP00000266732,9606.ENSP00000268182,9606.ENSP00000287295,9606.ENSP00000290231,9606.ENSP00000295688,9606.ENSP00000297338,9606.ENSP00000299300,9606.ENSP00000303427,9606.ENSP00000309555,9606.ENSP00000310129,9606.ENSP00000316032,…	PSMC4,EIF3D,PHF5A,STAG2,NUP107,NUP133,CSNK2A2,TMTC3,TMPO,IQGAP1,AIFM1,NCOA5,CCT3,RAD21,CCT2,PDS5A,HCFC1,PSMD2,NUP98,TCP1,SMC1A,TRIM25,KARS,EIF3C,CHD4,STAT1,AHCTF1,RBM15,FLNA,RPRD1B,NCBP1,EXOSC10,AHNAK,RBBP7,KDM1A,XPO1,MECP2,SMARCA4,TOP2A,EIF4G1
GO:0002191	cap-dependent translational initiation	0.0022	9606.ENSP00000216190,9606.ENSP00000416255	EIF3D,EIF4G1
GO:0060255	regulation of macromolecule metabolic process	0.0022	9606.ENSP00000157812,9606.ENSP00000216190,9606.ENSP00000216252,9606.ENSP00000218089,9606.ENSP00000229179,9606.ENSP00000245838,9606.ENSP00000261396,9606.ENSP00000262506,9606.ENSP00000266712,9606.ENSP00000266732,9606.ENSP00000268182,9606.ENSP00000287295,9606.ENSP00000290231,9606.ENSP00000295688,9606.ENSP00000297338,9606.ENSP00000299300,9606.ENSP00000303427,9606.ENSP00000309555,9606.ENSP00000310129,…	PSMC4,EIF3D,PHF5A,STAG2,NUP107,THOC2,NUP133,CSNK2A2,TMTC3,TMPO,IQGAP1,AIFM1,NCOA5,CCT3,RAD21,CCT2,PDS5A,HCFC1,PSMD2,NUP98,TCP1,SMC1A,TRIM25,KARS,EIF3C,CHD4,STAT1,AHCTF1,RBM15,FLNA,RPRD1B,NCBP1,EXOSC10,AHNAK,RBBP7,KDM1A,XPO1,MECP2,SMARCA4,TOP2A,EIF4G1
GO:0070507	regulation of microtubule cytoskeleton organization	0.0022	9606.ENSP00000218089,9606.ENSP00000283195,9606.ENSP00000323421,9606.ENSP00000348965,9606.ENSP00000384863,9606.ENSP00000395535	STAG2,RANBP2,SMC1A,DYNC1H1,XPO1,MECP2
GO:0046907	intracellular transport	0.0028	9606.ENSP00000215829,9606.ENSP00000229179,9606.ENSP00000245838,9606.ENSP00000261396,9606.ENSP00000283195,9606.ENSP00000312066,9606.ENSP00000316032,9606.ENSP00000327694,9606.ENSP00000343405,9606.ENSP00000348965,9606.ENSP00000349259,9606.ENSP00000360869,9606.ENSP00000361824,9606.ENSP00000364289,9606.ENSP00000384863,9606.ENSP00000436679	SNRPD3,NUP107,THOC2,NUP133,RANBP2,SRP68,NUP98,AP2A2,SEC24C,DYNC1H1,SPTBN1,IFIT1,SPTAN1,NCBP1,XPO1,NXF1
GO:0006886	intracellular protein transport	0.003	9606.ENSP00000229179,9606.ENSP00000245838,9606.ENSP00000261396,9606.ENSP00000283195,9606.ENSP00000312066,9606.ENSP00000316032,9606.ENSP00000327694,9606.ENSP00000343405,9606.ENSP00000360869,9606.ENSP00000364289,9606.ENSP00000384863,9606.ENSP00000436679	NUP107,THOC2,NUP133,RANBP2,SRP68,NUP98,AP2A2,SEC24C,IFIT1,NCBP1,XPO1,NXF1
GO:0000819	sister chromatid segregation	0.0034	9606.ENSP00000218089,9606.ENSP00000303427,9606.ENSP00000323421,9606.ENSP00000396704,9606.ENSP00000411532	STAG2,PDS5A,SMC1A,TOP2B,TOP2A
GO:0000973	posttranscriptional tethering of RNA polymerase II gene DNA at nuclear periphery	0.0034	9606.ENSP00000229179,9606.ENSP00000316032	NUP107,NUP98
GO:0008152	metabolic process	0.0034	9606.ENSP00000044462,9606.ENSP00000156471,9606.ENSP00000157812,9606.ENSP00000215071,9606.ENSP00000215829,9606.ENSP00000216190,9606.ENSP00000216252,9606.ENSP00000223073,9606.ENSP00000229179,9606.ENSP00000245838,9606.ENSP00000260324,9606.ENSP00000261396,9606.ENSP00000262506,9606.ENSP00000283195,9606.ENSP00000287295,9606.ENSP00000290231,9606.ENSP00000290573,9606.ENSP00000293677,9606.ENSP00000297338,…	PSMA4,AQR,PSMC4,PSMD8,SNRPD3,EIF3D,PHF5A,RBM28,NUP107,THOC2,SQRDL,NUP133,CSNK2A2,RANBP2,AIFM1,NCOA5,HK2,RAVER1,RAD21,PDS5A,HCFC1,PSMD2,CSTF3,NUP98,INTS3,SF3B2,SMC1A,TRIM25,KARS,AP2A2,EIF3C,SPTBN1,CHD4,STAT1,CTNNBL1,RBM15,FLNA,SPTAN1,RPRD1B,TEX10,NCBP1,EXOSC10,RBBP7,KDM1A,EFTUD2,MECP2,SMARCA4,FTSJ3,TOP2B,PNPLA6,TOP2A,EIF4G1,NXF1,DDX42,DGAT1
GO:0008334	histone mRNA metabolic process	0.0034	9606.ENSP00000215829,9606.ENSP00000364289,9606.ENSP00000366135	SNRPD3,NCBP1,EXOSC10
GO:0051130	positive regulation of cellular component organization	0.0034	9606.ENSP00000157812,9606.ENSP00000268182,9606.ENSP00000283195,9606.ENSP00000290573,9606.ENSP00000295688,9606.ENSP00000297338,9606.ENSP00000299300,9606.ENSP00000317334,9606.ENSP00000348965,9606.ENSP00000357206,9606.ENSP00000358866,9606.ENSP00000383042,9606.ENSP00000395535,9606.ENSP00000416255	PSMC4,IQGAP1,RANBP2,HK2,CCT3,RAD21,CCT2,TCP1,DYNC1H1,NES,FLNA,KDM1A,MECP2,EIF4G1
GO:0051170	import into nucleus	0.0034	9606.ENSP00000215829,9606.ENSP00000229179,9606.ENSP00000261396,9606.ENSP00000283195,9606.ENSP00000316032	SNRPD3,NUP107,NUP133,RANBP2,NUP98
GO:0051301	cell division	0.0034	9606.ENSP00000218089,9606.ENSP00000245838,9606.ENSP00000297338,9606.ENSP00000303427,9606.ENSP00000323421,9606.ENSP00000348965,9606.ENSP00000349259,9606.ENSP00000355465,9606.ENSP00000411532	STAG2,THOC2,RAD21,PDS5A,SMC1A,DYNC1H1,SPTBN1,AHCTF1,TOP2A
GO:0080090	regulation of primary metabolic process	0.0034	9606.ENSP00000157812,9606.ENSP00000216190,9606.ENSP00000216252,9606.ENSP00000218089,9606.ENSP00000229179,9606.ENSP00000261396,9606.ENSP00000262506,9606.ENSP00000266712,9606.ENSP00000266732,9606.ENSP00000268182,9606.ENSP00000287295,9606.ENSP00000290231,9606.ENSP00000295688,9606.ENSP00000297338,9606.ENSP00000299300,9606.ENSP00000303427,9606.ENSP00000309555,9606.ENSP00000310129,9606.ENSP00000316032,…	PSMC4,EIF3D,PHF5A,STAG2,NUP107,NUP133,CSNK2A2,TMTC3,TMPO,IQGAP1,AIFM1,NCOA5,CCT3,RAD21,CCT2,PDS5A,HCFC1,PSMD2,NUP98,TCP1,SMC1A,TRIM25,KARS,EIF3C,CHD4,STAT1,AHCTF1,RBM15,FLNA,RPRD1B,NCBP1,EXOSC10,AHNAK,RBBP7,KDM1A,XPO1,MECP2,SMARCA4,TOP2A,EIF4G1
GO:0006807	nitrogen compound metabolic process	0.0036	9606.ENSP00000044462,9606.ENSP00000156471,9606.ENSP00000157812,9606.ENSP00000215071,9606.ENSP00000215829,9606.ENSP00000216190,9606.ENSP00000216252,9606.ENSP00000223073,9606.ENSP00000245838,9606.ENSP00000262506,9606.ENSP00000283195,9606.ENSP00000290231,9606.ENSP00000290573,9606.ENSP00000293677,9606.ENSP00000297338,9606.ENSP00000303427,9606.ENSP00000309555,9606.ENSP00000310129,9606.ENSP00000315791,…	PSMA4,AQR,PSMC4,PSMD8,SNRPD3,EIF3D,PHF5A,RBM28,THOC2,CSNK2A2,RANBP2,NCOA5,HK2,RAVER1,RAD21,PDS5A,HCFC1,PSMD2,CSTF3,NUP98,INTS3,SF3B2,SMC1A,TRIM25,KARS,AP2A2,EIF3C,SPTBN1,CHD4,STAT1,CTNNBL1,RBM15,FLNA,SPTAN1,RPRD1B,TEX10,NCBP1,EXOSC10,RBBP7,KDM1A,EFTUD2,MECP2,SMARCA4,FTSJ3,TOP2B,PNPLA6,TOP2A,EIF4G1,DDX42,DGAT1
GO:0010557	positive regulation of macromolecule biosynthetic process	0.0038	9606.ENSP00000157812,9606.ENSP00000216190,9606.ENSP00000216252,9606.ENSP00000295688,9606.ENSP00000297338,9606.ENSP00000299300,9606.ENSP00000309555,9606.ENSP00000316032,9606.ENSP00000317334,9606.ENSP00000325448,9606.ENSP00000332604,9606.ENSP00000354394,9606.ENSP00000358799,9606.ENSP00000362532,9606.ENSP00000383042,9606.ENSP00000395535,9606.ENSP00000395654,9606.ENSP00000411532	PSMC4,EIF3D,PHF5A,CCT3,RAD21,CCT2,HCFC1,NUP98,TCP1,KARS,EIF3C,STAT1,RBM15,RPRD1B,KDM1A,MECP2,SMARCA4,TOP2A
GO:0048285	organelle fission	0.004	9606.ENSP00000297338,9606.ENSP00000303427,9606.ENSP00000323421,9606.ENSP00000358866,9606.ENSP00000381601,9606.ENSP00000396704,9606.ENSP00000411532	RAD21,PDS5A,SMC1A,FLNA,MX1,TOP2B,TOP2A
GO:0071704	organic substance metabolic process	0.004	9606.ENSP00000044462,9606.ENSP00000156471,9606.ENSP00000157812,9606.ENSP00000215071,9606.ENSP00000215829,9606.ENSP00000216190,9606.ENSP00000216252,9606.ENSP00000223073,9606.ENSP00000229179,9606.ENSP00000245838,9606.ENSP00000261396,9606.ENSP00000262506,9606.ENSP00000283195,9606.ENSP00000290231,9606.ENSP00000290573,9606.ENSP00000293677,9606.ENSP00000297338,9606.ENSP00000303427,9606.ENSP00000309555,…	PSMA4,AQR,PSMC4,PSMD8,SNRPD3,EIF3D,PHF5A,RBM28,NUP107,THOC2,NUP133,CSNK2A2,RANBP2,NCOA5,HK2,RAVER1,RAD21,PDS5A,HCFC1,PSMD2,CSTF3,NUP98,INTS3,SF3B2,SMC1A,TRIM25,KARS,AP2A2,EIF3C,SPTBN1,CHD4,STAT1,CTNNBL1,RBM15,FLNA,SPTAN1,RPRD1B,TEX10,NCBP1,EXOSC10,RBBP7,KDM1A,EFTUD2,MECP2,SMARCA4,FTSJ3,TOP2B,PNPLA6,TOP2A,EIF4G1,NXF1,DDX42,DGAT1
GO:0019222	regulation of metabolic process	0.0042	9606.ENSP00000157812,9606.ENSP00000216190,9606.ENSP00000216252,9606.ENSP00000218089,9606.ENSP00000229179,9606.ENSP00000245838,9606.ENSP00000261396,9606.ENSP00000262506,9606.ENSP00000266712,9606.ENSP00000266732,9606.ENSP00000268182,9606.ENSP00000287295,9606.ENSP00000290231,9606.ENSP00000290573,9606.ENSP00000295688,9606.ENSP00000297338,9606.ENSP00000299300,9606.ENSP00000303427,9606.ENSP00000309555,…	PSMC4,EIF3D,PHF5A,STAG2,NUP107,THOC2,NUP133,CSNK2A2,TMTC3,TMPO,IQGAP1,AIFM1,NCOA5,HK2,CCT3,RAD21,CCT2,PDS5A,HCFC1,PSMD2,NUP98,TCP1,SMC1A,TRIM25,KARS,EIF3C,CHD4,STAT1,AHCTF1,RBM15,FLNA,RPRD1B,NCBP1,EXOSC10,AHNAK,RBBP7,KDM1A,XPO1,MECP2,SMARCA4,TOP2A,EIF4G1
GO:0051649	establishment of localization in cell	0.0042	9606.ENSP00000215829,9606.ENSP00000229179,9606.ENSP00000245838,9606.ENSP00000261396,9606.ENSP00000283195,9606.ENSP00000312066,9606.ENSP00000316032,9606.ENSP00000327694,9606.ENSP00000343405,9606.ENSP00000348965,9606.ENSP00000349259,9606.ENSP00000360869,9606.ENSP00000361824,9606.ENSP00000363435,9606.ENSP00000364289,9606.ENSP00000384863,9606.ENSP00000436679	SNRPD3,NUP107,THOC2,NUP133,RANBP2,SRP68,NUP98,AP2A2,SEC24C,DYNC1H1,SPTBN1,IFIT1,SPTAN1,ITPR3,NCBP1,XPO1,NXF1
GO:0031323	regulation of cellular metabolic process	0.0044	9606.ENSP00000157812,9606.ENSP00000216190,9606.ENSP00000216252,9606.ENSP00000218089,9606.ENSP00000229179,9606.ENSP00000261396,9606.ENSP00000262506,9606.ENSP00000266712,9606.ENSP00000266732,9606.ENSP00000268182,9606.ENSP00000287295,9606.ENSP00000290231,9606.ENSP00000290573,9606.ENSP00000295688,9606.ENSP00000297338,9606.ENSP00000299300,9606.ENSP00000303427,9606.ENSP00000309555,9606.ENSP00000316032,…	PSMC4,EIF3D,PHF5A,STAG2,NUP107,NUP133,CSNK2A2,TMTC3,TMPO,IQGAP1,AIFM1,NCOA5,HK2,CCT3,RAD21,CCT2,PDS5A,HCFC1,NUP98,TCP1,SMC1A,TRIM25,KARS,EIF3C,CHD4,STAT1,AHCTF1,RBM15,FLNA,RPRD1B,NCBP1,EXOSC10,AHNAK,RBBP7,KDM1A,XPO1,MECP2,SMARCA4,TOP2A,EIF4G1
GO:0090169	regulation of spindle assembly	0.0044	9606.ENSP00000218089,9606.ENSP00000323421,9606.ENSP00000348965	STAG2,SMC1A,DYNC1H1
GO:1904874	positive regulation of telomerase RNA localization to Cajal body	0.0044	9606.ENSP00000299300,9606.ENSP00000317334	CCT2,TCP1
GO:0032876	negative regulation of DNA endoreduplication	0.006	9606.ENSP00000218089,9606.ENSP00000323421	STAG2,SMC1A
GO:0090666	scaRNA localization to Cajal body	0.006	9606.ENSP00000299300,9606.ENSP00000317334	CCT2,TCP1
GO:0002252	immune effector process	0.0061	9606.ENSP00000268182,9606.ENSP00000299300,9606.ENSP00000310129,9606.ENSP00000323889,9606.ENSP00000325448,9606.ENSP00000327694,9606.ENSP00000348965,9606.ENSP00000354394,9606.ENSP00000360869,9606.ENSP00000361824,9606.ENSP00000381601,9606.ENSP00000482264	IQGAP1,CCT2,PSMD2,TRIM25,KARS,AP2A2,DYNC1H1,STAT1,IFIT1,SPTAN1,MX1,DGAT1
GO:0031328	positive regulation of cellular biosynthetic process	0.0061	9606.ENSP00000157812,9606.ENSP00000216190,9606.ENSP00000216252,9606.ENSP00000295688,9606.ENSP00000297338,9606.ENSP00000299300,9606.ENSP00000309555,9606.ENSP00000316032,9606.ENSP00000317334,9606.ENSP00000325448,9606.ENSP00000332604,9606.ENSP00000354394,9606.ENSP00000358799,9606.ENSP00000362532,9606.ENSP00000383042,9606.ENSP00000395535,9606.ENSP00000395654,9606.ENSP00000411532	PSMC4,EIF3D,PHF5A,CCT3,RAD21,CCT2,HCFC1,NUP98,TCP1,KARS,EIF3C,STAT1,RBM15,RPRD1B,KDM1A,MECP2,SMARCA4,TOP2A
GO:0044237	cellular metabolic process	0.0063	9606.ENSP00000044462,9606.ENSP00000156471,9606.ENSP00000157812,9606.ENSP00000215071,9606.ENSP00000215829,9606.ENSP00000216190,9606.ENSP00000216252,9606.ENSP00000223073,9606.ENSP00000245838,9606.ENSP00000260324,9606.ENSP00000262506,9606.ENSP00000283195,9606.ENSP00000290231,9606.ENSP00000290573,9606.ENSP00000293677,9606.ENSP00000297338,9606.ENSP00000303427,9606.ENSP00000309555,9606.ENSP00000310129,…	PSMA4,AQR,PSMC4,PSMD8,SNRPD3,EIF3D,PHF5A,RBM28,THOC2,SQRDL,CSNK2A2,RANBP2,NCOA5,HK2,RAVER1,RAD21,PDS5A,HCFC1,PSMD2,CSTF3,NUP98,INTS3,SF3B2,SMC1A,TRIM25,KARS,AP2A2,EIF3C,SPTBN1,CHD4,STAT1,CTNNBL1,RBM15,FLNA,SPTAN1,RPRD1B,TEX10,NCBP1,EXOSC10,RBBP7,KDM1A,EFTUD2,MECP2,SMARCA4,FTSJ3,TOP2B,PNPLA6,TOP2A,EIF4G1,DDX42,DGAT1
GO:0006369	termination of RNA polymerase II transcription	0.0069	9606.ENSP00000215829,9606.ENSP00000315791,9606.ENSP00000364289	SNRPD3,CSTF3,NCBP1
GO:0015031	protein transport	0.0071	9606.ENSP00000229179,9606.ENSP00000245838,9606.ENSP00000261396,9606.ENSP00000283195,9606.ENSP00000312066,9606.ENSP00000316032,9606.ENSP00000317334,9606.ENSP00000327694,9606.ENSP00000343405,9606.ENSP00000349259,9606.ENSP00000355465,9606.ENSP00000360869,9606.ENSP00000364289,9606.ENSP00000384863,9606.ENSP00000436679	NUP107,THOC2,NUP133,RANBP2,SRP68,NUP98,TCP1,AP2A2,SEC24C,SPTBN1,AHCTF1,IFIT1,NCBP1,XPO1,NXF1
GO:0007339	binding of sperm to zona pellucida	0.0073	9606.ENSP00000295688,9606.ENSP00000299300,9606.ENSP00000317334	CCT3,CCT2,TCP1
GO:0008156	negative regulation of DNA replication	0.0073	9606.ENSP00000218089,9606.ENSP00000303427,9606.ENSP00000323421	STAG2,PDS5A,SMC1A
GO:0032212	positive regulation of telomere maintenance via telomerase	0.0073	9606.ENSP00000295688,9606.ENSP00000299300,9606.ENSP00000317334	CCT3,CCT2,TCP1
GO:0060236	regulation of mitotic spindle organization	0.0088	9606.ENSP00000218089,9606.ENSP00000323421,9606.ENSP00000348965	STAG2,SMC1A,DYNC1H1
GO:1901998	toxin transport	0.0088	9606.ENSP00000295688,9606.ENSP00000299300,9606.ENSP00000317334	CCT3,CCT2,TCP1
GO:0034504	protein localization to nucleus	0.0094	9606.ENSP00000229179,9606.ENSP00000261396,9606.ENSP00000283195,9606.ENSP00000316032,9606.ENSP00000384863	NUP107,NUP133,RANBP2,NUP98,XPO1
GO:0007059	chromosome segregation	0.0095	9606.ENSP00000218089,9606.ENSP00000297338,9606.ENSP00000303427,9606.ENSP00000323421,9606.ENSP00000396704,9606.ENSP00000411532	STAG2,RAD21,PDS5A,SMC1A,TOP2B,TOP2A
GO:1903827	regulation of cellular protein localization	0.0095	9606.ENSP00000245838,9606.ENSP00000268182,9606.ENSP00000295688,9606.ENSP00000299300,9606.ENSP00000317334,9606.ENSP00000349259,9606.ENSP00000383042,9606.ENSP00000384863	THOC2,IQGAP1,CCT3,CCT2,TCP1,SPTBN1,KDM1A,XPO1
GO:0006458	'de novo' protein folding	0.0096	9606.ENSP00000295688,9606.ENSP00000299300,9606.ENSP00000317334	CCT3,CCT2,TCP1
GO:0007062	sister chromatid cohesion	0.0096	9606.ENSP00000218089,9606.ENSP00000303427,9606.ENSP00000323421	STAG2,PDS5A,SMC1A
GO:0045935	positive regulation of nucleobase-containing compound metabolic process	0.0096	9606.ENSP00000157812,9606.ENSP00000216252,9606.ENSP00000295688,9606.ENSP00000297338,9606.ENSP00000299300,9606.ENSP00000309555,9606.ENSP00000316032,9606.ENSP00000317334,9606.ENSP00000325448,9606.ENSP00000354394,9606.ENSP00000358799,9606.ENSP00000362532,9606.ENSP00000364289,9606.ENSP00000383042,9606.ENSP00000395535,9606.ENSP00000395654,9606.ENSP00000411532	PSMC4,PHF5A,CCT3,RAD21,CCT2,HCFC1,NUP98,TCP1,KARS,STAT1,RBM15,RPRD1B,NCBP1,KDM1A,MECP2,SMARCA4,TOP2A
GO:0048525	negative regulation of viral process	0.0096	9606.ENSP00000323889,9606.ENSP00000354394,9606.ENSP00000360869,9606.ENSP00000381601	TRIM25,STAT1,IFIT1,MX1
GO:0050821	protein stabilization	0.0096	9606.ENSP00000295688,9606.ENSP00000299300,9606.ENSP00000309555,9606.ENSP00000317334,9606.ENSP00000358866	CCT3,CCT2,HCFC1,TCP1,FLNA
GO:0051098	regulation of binding	0.0096	9606.ENSP00000216190,9606.ENSP00000332604,9606.ENSP00000357206,9606.ENSP00000360869,9606.ENSP00000364289,9606.ENSP00000383042,9606.ENSP00000416255	EIF3D,EIF3C,NES,IFIT1,NCBP1,KDM1A,EIF4G1
GO:0046719	regulation by virus of viral protein levels in host cell	0.0102	9606.ENSP00000354394,9606.ENSP00000360869	STAT1,IFIT1
GO:0044087	regulation of cellular component biogenesis	0.0106	9606.ENSP00000157812,9606.ENSP00000218089,9606.ENSP00000268182,9606.ENSP00000309555,9606.ENSP00000323421,9606.ENSP00000348965,9606.ENSP00000349259,9606.ENSP00000358866,9606.ENSP00000361824,9606.ENSP00000395535,9606.ENSP00000416255	PSMC4,STAG2,IQGAP1,HCFC1,SMC1A,DYNC1H1,SPTBN1,FLNA,SPTAN1,MECP2,EIF4G1
GO:0051099	positive regulation of binding	0.0106	9606.ENSP00000216190,9606.ENSP00000332604,9606.ENSP00000364289,9606.ENSP00000383042,9606.ENSP00000416255	EIF3D,EIF3C,NCBP1,KDM1A,EIF4G1
GO:0031325	positive regulation of cellular metabolic process	0.0108	9606.ENSP00000157812,9606.ENSP00000216190,9606.ENSP00000216252,9606.ENSP00000266712,9606.ENSP00000268182,9606.ENSP00000287295,9606.ENSP00000290573,9606.ENSP00000295688,9606.ENSP00000297338,9606.ENSP00000299300,9606.ENSP00000309555,9606.ENSP00000316032,9606.ENSP00000317334,9606.ENSP00000325448,9606.ENSP00000332604,9606.ENSP00000354394,9606.ENSP00000358799,9606.ENSP00000362532,9606.ENSP00000364289,…	PSMC4,EIF3D,PHF5A,TMTC3,IQGAP1,AIFM1,HK2,CCT3,RAD21,CCT2,HCFC1,NUP98,TCP1,KARS,EIF3C,STAT1,RBM15,RPRD1B,NCBP1,KDM1A,MECP2,SMARCA4,TOP2A,EIF4G1
GO:0000280	nuclear division	0.0116	9606.ENSP00000297338,9606.ENSP00000303427,9606.ENSP00000323421,9606.ENSP00000358866,9606.ENSP00000396704,9606.ENSP00000411532	RAD21,PDS5A,SMC1A,FLNA,TOP2B,TOP2A
GO:0006606	protein import into nucleus	0.0117	9606.ENSP00000229179,9606.ENSP00000261396,9606.ENSP00000283195,9606.ENSP00000316032	NUP107,NUP133,RANBP2,NUP98
GO:0044238	primary metabolic process	0.0117	9606.ENSP00000044462,9606.ENSP00000156471,9606.ENSP00000157812,9606.ENSP00000215071,9606.ENSP00000215829,9606.ENSP00000216190,9606.ENSP00000216252,9606.ENSP00000223073,9606.ENSP00000245838,9606.ENSP00000262506,9606.ENSP00000283195,9606.ENSP00000290231,9606.ENSP00000290573,9606.ENSP00000293677,9606.ENSP00000297338,9606.ENSP00000303427,9606.ENSP00000309555,9606.ENSP00000310129,9606.ENSP00000315791,…	PSMA4,AQR,PSMC4,PSMD8,SNRPD3,EIF3D,PHF5A,RBM28,THOC2,CSNK2A2,RANBP2,NCOA5,HK2,RAVER1,RAD21,PDS5A,HCFC1,PSMD2,CSTF3,NUP98,INTS3,SF3B2,SMC1A,TRIM25,KARS,AP2A2,EIF3C,SPTBN1,CHD4,STAT1,CTNNBL1,RBM15,FLNA,SPTAN1,RPRD1B,TEX10,NCBP1,EXOSC10,RBBP7,KDM1A,EFTUD2,MECP2,SMARCA4,FTSJ3,TOP2B,PNPLA6,TOP2A,EIF4G1,DDX42,DGAT1
GO:0006265	DNA topological change	0.0118	9606.ENSP00000396704,9606.ENSP00000411532	TOP2B,TOP2A
GO:0044417	translocation of molecules into host	0.0118	9606.ENSP00000245838,9606.ENSP00000317334	THOC2,TCP1
GO:0036230	granulocyte activation	0.0137	9606.ENSP00000268182,9606.ENSP00000299300,9606.ENSP00000310129,9606.ENSP00000325448,9606.ENSP00000327694,9606.ENSP00000348965,9606.ENSP00000361824,9606.ENSP00000482264	IQGAP1,CCT2,PSMD2,KARS,AP2A2,DYNC1H1,SPTAN1,DGAT1
GO:0010468	regulation of gene expression	0.0141	9606.ENSP00000157812,9606.ENSP00000216190,9606.ENSP00000216252,9606.ENSP00000229179,9606.ENSP00000245838,9606.ENSP00000261396,9606.ENSP00000262506,9606.ENSP00000266732,9606.ENSP00000290231,9606.ENSP00000297338,9606.ENSP00000309555,9606.ENSP00000316032,9606.ENSP00000323889,9606.ENSP00000325448,9606.ENSP00000332604,9606.ENSP00000349508,9606.ENSP00000354394,9606.ENSP00000355465,9606.ENSP00000358799,…	PSMC4,EIF3D,PHF5A,NUP107,THOC2,NUP133,CSNK2A2,TMPO,NCOA5,RAD21,HCFC1,NUP98,TRIM25,KARS,EIF3C,CHD4,STAT1,AHCTF1,RBM15,FLNA,RPRD1B,NCBP1,EXOSC10,AHNAK,RBBP7,KDM1A,XPO1,MECP2,SMARCA4,TOP2A,EIF4G1
GO:0006810	transport	0.0144	9606.ENSP00000215829,9606.ENSP00000229179,9606.ENSP00000245838,9606.ENSP00000261396,9606.ENSP00000268182,9606.ENSP00000283195,9606.ENSP00000290573,9606.ENSP00000295688,9606.ENSP00000299300,9606.ENSP00000310129,9606.ENSP00000312066,9606.ENSP00000316032,9606.ENSP00000317334,9606.ENSP00000327694,9606.ENSP00000343405,9606.ENSP00000348965,9606.ENSP00000349259,9606.ENSP00000355465,9606.ENSP00000358866,…	SNRPD3,NUP107,THOC2,NUP133,IQGAP1,RANBP2,HK2,CCT3,CCT2,PSMD2,SRP68,NUP98,TCP1,AP2A2,SEC24C,DYNC1H1,SPTBN1,AHCTF1,FLNA,IFIT1,SPTAN1,ITPR3,NCBP1,SAMD9,MYO1B,XPO1,MECP2,NXF1,DGAT1
GO:0051173	positive regulation of nitrogen compound metabolic process	0.0144	9606.ENSP00000157812,9606.ENSP00000216190,9606.ENSP00000216252,9606.ENSP00000266712,9606.ENSP00000268182,9606.ENSP00000287295,9606.ENSP00000295688,9606.ENSP00000297338,9606.ENSP00000299300,9606.ENSP00000309555,9606.ENSP00000316032,9606.ENSP00000317334,9606.ENSP00000325448,9606.ENSP00000332604,9606.ENSP00000354394,9606.ENSP00000358799,9606.ENSP00000362532,9606.ENSP00000364289,9606.ENSP00000383042,…	PSMC4,EIF3D,PHF5A,TMTC3,IQGAP1,AIFM1,CCT3,RAD21,CCT2,HCFC1,NUP98,TCP1,KARS,EIF3C,STAT1,RBM15,RPRD1B,NCBP1,KDM1A,MECP2,SMARCA4,TOP2A,EIF4G1
GO:0071705	nitrogen compound transport	0.0144	9606.ENSP00000229179,9606.ENSP00000245838,9606.ENSP00000261396,9606.ENSP00000283195,9606.ENSP00000312066,9606.ENSP00000316032,9606.ENSP00000317334,9606.ENSP00000327694,9606.ENSP00000343405,9606.ENSP00000349259,9606.ENSP00000355465,9606.ENSP00000360869,9606.ENSP00000364289,9606.ENSP00000384863,9606.ENSP00000395535,9606.ENSP00000436679	NUP107,THOC2,NUP133,RANBP2,SRP68,NUP98,TCP1,AP2A2,SEC24C,SPTBN1,AHCTF1,IFIT1,NCBP1,XPO1,MECP2,NXF1
GO:0006259	DNA metabolic process	0.0147	9606.ENSP00000156471,9606.ENSP00000297338,9606.ENSP00000303427,9606.ENSP00000316032,9606.ENSP00000318641,9606.ENSP00000323421,9606.ENSP00000323889,9606.ENSP00000369424,9606.ENSP00000396704,9606.ENSP00000411532	AQR,RAD21,PDS5A,NUP98,INTS3,SMC1A,TRIM25,RBBP7,TOP2B,TOP2A
GO:0007131	reciprocal meiotic recombination	0.0147	9606.ENSP00000297338,9606.ENSP00000396704,9606.ENSP00000411532	RAD21,TOP2B,TOP2A
GO:2000179	positive regulation of neural precursor cell proliferation	0.0153	9606.ENSP00000357206,9606.ENSP00000358866,9606.ENSP00000383042	NES,FLNA,KDM1A
GO:0002275	myeloid cell activation involved in immune response	0.0158	9606.ENSP00000268182,9606.ENSP00000299300,9606.ENSP00000310129,9606.ENSP00000325448,9606.ENSP00000327694,9606.ENSP00000348965,9606.ENSP00000361824,9606.ENSP00000482264	IQGAP1,CCT2,PSMD2,KARS,AP2A2,DYNC1H1,SPTAN1,DGAT1
GO:0050794	regulation of cellular process	0.0162	9606.ENSP00000157812,9606.ENSP00000216190,9606.ENSP00000216252,9606.ENSP00000218089,9606.ENSP00000229179,9606.ENSP00000245838,9606.ENSP00000261366,9606.ENSP00000261396,9606.ENSP00000262506,9606.ENSP00000266712,9606.ENSP00000266732,9606.ENSP00000268182,9606.ENSP00000283195,9606.ENSP00000287295,9606.ENSP00000290231,9606.ENSP00000290573,9606.ENSP00000295688,9606.ENSP00000297338,9606.ENSP00000299300,…	PSMC4,EIF3D,PHF5A,STAG2,NUP107,THOC2,LMNB1,NUP133,CSNK2A2,TMTC3,TMPO,IQGAP1,RANBP2,AIFM1,NCOA5,HK2,CCT3,RAD21,CCT2,PDS5A,HCFC1,NUP98,TCP1,INTS3,SMC1A,TRIM25,KARS,AP2A2,EIF3C,DYNC1H1,SPTBN1,CHD4,STAT1,CTNNBL1,AHCTF1,NES,RBM15,FLNA,IFIT1,SPTAN1,RPRD1B,ITPR3,NCBP1,EXOSC10,AHNAK,RBBP7,MX1,KDM1A,XPO1,MECP2,SMARCA4,TOP2B,TOP2A,EIF4G1,FLNB,DDX42
GO:0051179	localization	0.0164	9606.ENSP00000215829,9606.ENSP00000229179,9606.ENSP00000245838,9606.ENSP00000261396,9606.ENSP00000268182,9606.ENSP00000283195,9606.ENSP00000290573,9606.ENSP00000295688,9606.ENSP00000297338,9606.ENSP00000299300,9606.ENSP00000310129,9606.ENSP00000312066,9606.ENSP00000316032,9606.ENSP00000317334,9606.ENSP00000327694,9606.ENSP00000343405,9606.ENSP00000348965,9606.ENSP00000349259,9606.ENSP00000355465,…	SNRPD3,NUP107,THOC2,NUP133,IQGAP1,RANBP2,HK2,CCT3,RAD21,CCT2,PSMD2,SRP68,NUP98,TCP1,AP2A2,SEC24C,DYNC1H1,SPTBN1,AHCTF1,FLNA,IFIT1,SPTAN1,ITPR3,NCBP1,EXOSC10,SAMD9,MYO1B,XPO1,MECP2,TOP2B,FLNB,NXF1,DDX42,DGAT1
GO:0019221	cytokine-mediated signaling pathway	0.0167	9606.ENSP00000261366,9606.ENSP00000317334,9606.ENSP00000323889,9606.ENSP00000325448,9606.ENSP00000354394,9606.ENSP00000358799,9606.ENSP00000360869,9606.ENSP00000381601,9606.ENSP00000395654	LMNB1,TCP1,TRIM25,KARS,STAT1,RBM15,IFIT1,MX1,SMARCA4
GO:0043484	regulation of RNA splicing	0.0171	9606.ENSP00000316032,9606.ENSP00000358799,9606.ENSP00000364289,9606.ENSP00000367263	NUP98,RBM15,NCBP1,AHNAK
GO:2001251	negative regulation of chromosome organization	0.0175	9606.ENSP00000297338,9606.ENSP00000366135,9606.ENSP00000395535,9606.ENSP00000411532	RAD21,EXOSC10,MECP2,TOP2A
GO:0022618	ribonucleoprotein complex assembly	0.0183	9606.ENSP00000215829,9606.ENSP00000216190,9606.ENSP00000253107,9606.ENSP00000348965,9606.ENSP00000364289	SNRPD3,EIF3D,PPAN,DYNC1H1,NCBP1
GO:0051495	positive regulation of cytoskeleton organization	0.0183	9606.ENSP00000283195,9606.ENSP00000348965,9606.ENSP00000357206,9606.ENSP00000358866,9606.ENSP00000395535	RANBP2,DYNC1H1,NES,FLNA,MECP2
GO:0071345	cellular response to cytokine stimulus	0.019	9606.ENSP00000261366,9606.ENSP00000290573,9606.ENSP00000317334,9606.ENSP00000323889,9606.ENSP00000325448,9606.ENSP00000354394,9606.ENSP00000358799,9606.ENSP00000360869,9606.ENSP00000381601,9606.ENSP00000395654,9606.ENSP00000420213	LMNB1,HK2,TCP1,TRIM25,KARS,STAT1,RBM15,IFIT1,MX1,SMARCA4,FLNB
GO:0044260	cellular macromolecule metabolic process	0.0197	9606.ENSP00000044462,9606.ENSP00000156471,9606.ENSP00000157812,9606.ENSP00000215071,9606.ENSP00000215829,9606.ENSP00000216190,9606.ENSP00000216252,9606.ENSP00000262506,9606.ENSP00000283195,9606.ENSP00000290231,9606.ENSP00000297338,9606.ENSP00000303427,9606.ENSP00000309555,9606.ENSP00000310129,9606.ENSP00000315791,9606.ENSP00000316032,9606.ENSP00000318641,9606.ENSP00000323421,9606.ENSP00000323889,…	PSMA4,AQR,PSMC4,PSMD8,SNRPD3,EIF3D,PHF5A,CSNK2A2,RANBP2,NCOA5,RAD21,PDS5A,HCFC1,PSMD2,CSTF3,NUP98,INTS3,SMC1A,TRIM25,KARS,AP2A2,EIF3C,SPTBN1,CHD4,STAT1,RBM15,FLNA,SPTAN1,RPRD1B,NCBP1,EXOSC10,RBBP7,KDM1A,MECP2,SMARCA4,FTSJ3,TOP2B,TOP2A,EIF4G1
GO:0007051	spindle organization	0.0202	9606.ENSP00000283195,9606.ENSP00000348965,9606.ENSP00000358866,9606.ENSP00000395535	RANBP2,DYNC1H1,FLNA,MECP2
GO:0050789	regulation of biological process	0.0202	9606.ENSP00000157812,9606.ENSP00000216190,9606.ENSP00000216252,9606.ENSP00000218089,9606.ENSP00000229179,9606.ENSP00000245838,9606.ENSP00000261366,9606.ENSP00000261396,9606.ENSP00000262506,9606.ENSP00000266712,9606.ENSP00000266732,9606.ENSP00000268182,9606.ENSP00000283195,9606.ENSP00000287295,9606.ENSP00000290231,9606.ENSP00000290573,9606.ENSP00000295688,9606.ENSP00000297338,9606.ENSP00000299300,…	PSMC4,EIF3D,PHF5A,STAG2,NUP107,THOC2,LMNB1,NUP133,CSNK2A2,TMTC3,TMPO,IQGAP1,RANBP2,AIFM1,NCOA5,HK2,CCT3,RAD21,CCT2,PDS5A,HCFC1,PSMD2,NUP98,TCP1,INTS3,SMC1A,TRIM25,KARS,AP2A2,EIF3C,DYNC1H1,SPTBN1,CHD4,STAT1,CTNNBL1,AHCTF1,NES,RBM15,FLNA,IFIT1,SPTAN1,RPRD1B,ITPR3,NCBP1,EXOSC10,AHNAK,RBBP7,MX1,KDM1A,XPO1,MECP2,SMARCA4,TOP2B,TOP2A,EIF4G1,FLNB,DDX42,DGAT1
GO:0016575	histone deacetylation	0.0208	9606.ENSP00000349508,9606.ENSP00000369424,9606.ENSP00000383042	CHD4,RBBP7,KDM1A
GO:0000712	resolution of meiotic recombination intermediates	0.021	9606.ENSP00000396704,9606.ENSP00000411532	TOP2B,TOP2A
GO:0009048	dosage compensation by inactivation of X chromosome	0.021	9606.ENSP00000358799,9606.ENSP00000366135	RBM15,EXOSC10
GO:0048522	positive regulation of cellular process	0.021	9606.ENSP00000157812,9606.ENSP00000216190,9606.ENSP00000216252,9606.ENSP00000266712,9606.ENSP00000268182,9606.ENSP00000283195,9606.ENSP00000287295,9606.ENSP00000290573,9606.ENSP00000295688,9606.ENSP00000297338,9606.ENSP00000299300,9606.ENSP00000309555,9606.ENSP00000316032,9606.ENSP00000317334,9606.ENSP00000323889,9606.ENSP00000325448,9606.ENSP00000332604,9606.ENSP00000348965,9606.ENSP00000349259,…	PSMC4,EIF3D,PHF5A,TMTC3,IQGAP1,RANBP2,AIFM1,HK2,CCT3,RAD21,CCT2,HCFC1,NUP98,TCP1,TRIM25,KARS,EIF3C,DYNC1H1,SPTBN1,STAT1,CTNNBL1,NES,RBM15,FLNA,RPRD1B,ITPR3,NCBP1,KDM1A,MECP2,SMARCA4,TOP2A,EIF4G1
GO:0051321	meiotic cell cycle	0.0213	9606.ENSP00000218089,9606.ENSP00000297338,9606.ENSP00000323421,9606.ENSP00000396704,9606.ENSP00000411532	STAG2,RAD21,SMC1A,TOP2B,TOP2A
GO:0010604	positive regulation of macromolecule metabolic process	0.0222	9606.ENSP00000157812,9606.ENSP00000216190,9606.ENSP00000216252,9606.ENSP00000266712,9606.ENSP00000268182,9606.ENSP00000287295,9606.ENSP00000295688,9606.ENSP00000297338,9606.ENSP00000299300,9606.ENSP00000309555,9606.ENSP00000316032,9606.ENSP00000317334,9606.ENSP00000325448,9606.ENSP00000332604,9606.ENSP00000354394,9606.ENSP00000358799,9606.ENSP00000362532,9606.ENSP00000364289,9606.ENSP00000383042,…	PSMC4,EIF3D,PHF5A,TMTC3,IQGAP1,AIFM1,CCT3,RAD21,CCT2,HCFC1,NUP98,TCP1,KARS,EIF3C,STAT1,RBM15,RPRD1B,NCBP1,KDM1A,MECP2,SMARCA4,TOP2A,EIF4G1
GO:0016973	poly(A)+ mRNA export from nucleus	0.0229	9606.ENSP00000245838,9606.ENSP00000436679	THOC2,NXF1
GO:0051252	regulation of RNA metabolic process	0.023	9606.ENSP00000157812,9606.ENSP00000216252,9606.ENSP00000229179,9606.ENSP00000261396,9606.ENSP00000262506,9606.ENSP00000266732,9606.ENSP00000290231,9606.ENSP00000297338,9606.ENSP00000309555,9606.ENSP00000316032,9606.ENSP00000323889,9606.ENSP00000325448,9606.ENSP00000349508,9606.ENSP00000354394,9606.ENSP00000355465,9606.ENSP00000358799,9606.ENSP00000358866,9606.ENSP00000362532,9606.ENSP00000364289,…	PSMC4,PHF5A,NUP107,NUP133,CSNK2A2,TMPO,NCOA5,RAD21,HCFC1,NUP98,TRIM25,KARS,CHD4,STAT1,AHCTF1,RBM15,FLNA,RPRD1B,NCBP1,AHNAK,RBBP7,KDM1A,XPO1,MECP2,SMARCA4,TOP2A,EIF4G1
GO:0044265	cellular macromolecule catabolic process	0.0232	9606.ENSP00000044462,9606.ENSP00000157812,9606.ENSP00000215071,9606.ENSP00000283195,9606.ENSP00000310129,9606.ENSP00000323889,9606.ENSP00000327694,9606.ENSP00000364289,9606.ENSP00000366135,9606.ENSP00000416255	PSMA4,PSMC4,PSMD8,RANBP2,PSMD2,TRIM25,AP2A2,NCBP1,EXOSC10,EIF4G1
GO:0007064	mitotic sister chromatid cohesion	0.0251	9606.ENSP00000303427,9606.ENSP00000323421	PDS5A,SMC1A
GO:0051053	negative regulation of DNA metabolic process	0.0251	9606.ENSP00000218089,9606.ENSP00000303427,9606.ENSP00000323421,9606.ENSP00000366135	STAG2,PDS5A,SMC1A,EXOSC10
GO:0061077	chaperone-mediated protein folding	0.0252	9606.ENSP00000295688,9606.ENSP00000299300,9606.ENSP00000317334	CCT3,CCT2,TCP1
GO:1903900	regulation of viral life cycle	0.0252	9606.ENSP00000323889,9606.ENSP00000360869,9606.ENSP00000381601,9606.ENSP00000411532	TRIM25,IFIT1,MX1,TOP2A
GO:0010628	positive regulation of gene expression	0.0253	9606.ENSP00000157812,9606.ENSP00000216190,9606.ENSP00000216252,9606.ENSP00000297338,9606.ENSP00000309555,9606.ENSP00000316032,9606.ENSP00000325448,9606.ENSP00000332604,9606.ENSP00000354394,9606.ENSP00000358799,9606.ENSP00000362532,9606.ENSP00000364289,9606.ENSP00000383042,9606.ENSP00000395535,9606.ENSP00000395654,9606.ENSP00000411532	PSMC4,EIF3D,PHF5A,RAD21,HCFC1,NUP98,KARS,EIF3C,STAT1,RBM15,RPRD1B,NCBP1,KDM1A,MECP2,SMARCA4,TOP2A
GO:0010639	negative regulation of organelle organization	0.0254	9606.ENSP00000297338,9606.ENSP00000349259,9606.ENSP00000361824,9606.ENSP00000366135,9606.ENSP00000395535,9606.ENSP00000411532	RAD21,SPTBN1,SPTAN1,EXOSC10,MECP2,TOP2A
GO:0048026	positive regulation of mRNA splicing, via spliceosome	0.0269	9606.ENSP00000316032,9606.ENSP00000364289	NUP98,NCBP1
GO:0060337	type I interferon signaling pathway	0.0269	9606.ENSP00000354394,9606.ENSP00000360869,9606.ENSP00000381601	STAT1,IFIT1,MX1
GO:0034470	ncRNA processing	0.0273	9606.ENSP00000318641,9606.ENSP00000325448,9606.ENSP00000364037,9606.ENSP00000364289,9606.ENSP00000366135,9606.ENSP00000396673	INTS3,KARS,TEX10,NCBP1,EXOSC10,FTSJ3
GO:0007221	positive regulation of transcription of Notch receptor target	0.0291	9606.ENSP00000354394,9606.ENSP00000358799	STAT1,RBM15
GO:1903311	regulation of mRNA metabolic process	0.0297	9606.ENSP00000316032,9606.ENSP00000358799,9606.ENSP00000364289,9606.ENSP00000384863,9606.ENSP00000416255	NUP98,RBM15,NCBP1,XPO1,EIF4G1
GO:0007052	mitotic spindle organization	0.0312	9606.ENSP00000348965,9606.ENSP00000358866,9606.ENSP00000395535	DYNC1H1,FLNA,MECP2
GO:0043632	modification-dependent macromolecule catabolic process	0.0318	9606.ENSP00000044462,9606.ENSP00000157812,9606.ENSP00000215071,9606.ENSP00000283195,9606.ENSP00000310129,9606.ENSP00000323889,9606.ENSP00000366135	PSMA4,PSMC4,PSMD8,RANBP2,PSMD2,TRIM25,EXOSC10
GO:0042795	snRNA transcription by RNA polymerase II	0.0319	9606.ENSP00000318641,9606.ENSP00000362532,9606.ENSP00000364289	INTS3,RPRD1B,NCBP1
GO:0032880	regulation of protein localization	0.0329	9606.ENSP00000245838,9606.ENSP00000268182,9606.ENSP00000295688,9606.ENSP00000299300,9606.ENSP00000317334,9606.ENSP00000325448,9606.ENSP00000349259,9606.ENSP00000363435,9606.ENSP00000383042,9606.ENSP00000384863	THOC2,IQGAP1,CCT3,CCT2,TCP1,KARS,SPTBN1,ITPR3,KDM1A,XPO1
GO:0051235	maintenance of location	0.0329	9606.ENSP00000290573,9606.ENSP00000358866,9606.ENSP00000420213,9606.ENSP00000482264	HK2,FLNA,FLNB,DGAT1
GO:1901673	regulation of mitotic spindle assembly	0.0329	9606.ENSP00000218089,9606.ENSP00000323421	STAG2,SMC1A
GO:0043312	neutrophil degranulation	0.0337	9606.ENSP00000268182,9606.ENSP00000299300,9606.ENSP00000310129,9606.ENSP00000327694,9606.ENSP00000348965,9606.ENSP00000361824,9606.ENSP00000482264	IQGAP1,CCT2,PSMD2,AP2A2,DYNC1H1,SPTAN1,DGAT1
GO:0040029	regulation of gene expression, epigenetic	0.0342	9606.ENSP00000358799,9606.ENSP00000364289,9606.ENSP00000366135,9606.ENSP00000369424,9606.ENSP00000395535	RBM15,NCBP1,EXOSC10,RBBP7,MECP2
GO:0060341	regulation of cellular localization	0.0348	9606.ENSP00000245838,9606.ENSP00000268182,9606.ENSP00000295688,9606.ENSP00000299300,9606.ENSP00000317334,9606.ENSP00000348965,9606.ENSP00000349259,9606.ENSP00000383042,9606.ENSP00000384863	THOC2,IQGAP1,CCT3,CCT2,TCP1,DYNC1H1,SPTBN1,KDM1A,XPO1
GO:1901879	regulation of protein depolymerization	0.0348	9606.ENSP00000349259,9606.ENSP00000357206,9606.ENSP00000361824	SPTBN1,NES,SPTAN1
GO:0042176	regulation of protein catabolic process	0.0356	9606.ENSP00000157812,9606.ENSP00000262506,9606.ENSP00000266712,9606.ENSP00000310129,9606.ENSP00000358866,9606.ENSP00000384863	PSMC4,CSNK2A2,TMTC3,PSMD2,FLNA,XPO1
GO:0034660	ncRNA metabolic process	0.0367	9606.ENSP00000318641,9606.ENSP00000325448,9606.ENSP00000362532,9606.ENSP00000364037,9606.ENSP00000364289,9606.ENSP00000366135,9606.ENSP00000396673	INTS3,KARS,RPRD1B,TEX10,NCBP1,EXOSC10,FTSJ3
GO:0048024	regulation of mRNA splicing, via spliceosome	0.0367	9606.ENSP00000316032,9606.ENSP00000358799,9606.ENSP00000364289	NUP98,RBM15,NCBP1
GO:0071103	DNA conformation change	0.0367	9606.ENSP00000287295,9606.ENSP00000349508,9606.ENSP00000369424,9606.ENSP00000396704,9606.ENSP00000411532	AIFM1,CHD4,RBBP7,TOP2B,TOP2A
GO:1903901	negative regulation of viral life cycle	0.0367	9606.ENSP00000323889,9606.ENSP00000360869,9606.ENSP00000381601	TRIM25,IFIT1,MX1
GO:0031124	mRNA 3'-end processing	0.0372	9606.ENSP00000245838,9606.ENSP00000315791,9606.ENSP00000364289	THOC2,CSTF3,NCBP1
GO:0007088	regulation of mitotic nuclear division	0.0376	9606.ENSP00000218089,9606.ENSP00000283195,9606.ENSP00000297338,9606.ENSP00000323421	STAG2,RANBP2,RAD21,SMC1A
GO:0045787	positive regulation of cell cycle	0.0379	9606.ENSP00000283195,9606.ENSP00000297338,9606.ENSP00000309555,9606.ENSP00000348965,9606.ENSP00000395535,9606.ENSP00000416255	RANBP2,RAD21,HCFC1,DYNC1H1,MECP2,EIF4G1
GO:0048519	negative regulation of biological process	0.0393	9606.ENSP00000218089,9606.ENSP00000245838,9606.ENSP00000262506,9606.ENSP00000268182,9606.ENSP00000290231,9606.ENSP00000290573,9606.ENSP00000297338,9606.ENSP00000303427,9606.ENSP00000309555,9606.ENSP00000318641,9606.ENSP00000323421,9606.ENSP00000323889,9606.ENSP00000325448,9606.ENSP00000349259,9606.ENSP00000354394,9606.ENSP00000358799,9606.ENSP00000358866,9606.ENSP00000360869,9606.ENSP00000361824,…	STAG2,THOC2,CSNK2A2,IQGAP1,NCOA5,HK2,RAD21,PDS5A,HCFC1,INTS3,SMC1A,TRIM25,KARS,SPTBN1,STAT1,RBM15,FLNA,IFIT1,SPTAN1,ITPR3,NCBP1,EXOSC10,RBBP7,MX1,KDM1A,XPO1,MECP2,SMARCA4,TOP2B,TOP2A,EIF4G1
GO:0051254	positive regulation of RNA metabolic process	0.0393	9606.ENSP00000157812,9606.ENSP00000216252,9606.ENSP00000297338,9606.ENSP00000309555,9606.ENSP00000316032,9606.ENSP00000325448,9606.ENSP00000354394,9606.ENSP00000358799,9606.ENSP00000362532,9606.ENSP00000364289,9606.ENSP00000383042,9606.ENSP00000395535,9606.ENSP00000395654,9606.ENSP00000411532	PSMC4,PHF5A,RAD21,HCFC1,NUP98,KARS,STAT1,RBM15,RPRD1B,NCBP1,KDM1A,MECP2,SMARCA4,TOP2A
GO:0065007	biological regulation	0.0393	9606.ENSP00000157812,9606.ENSP00000216190,9606.ENSP00000216252,9606.ENSP00000218089,9606.ENSP00000229179,9606.ENSP00000245838,9606.ENSP00000261366,9606.ENSP00000261396,9606.ENSP00000262506,9606.ENSP00000266712,9606.ENSP00000266732,9606.ENSP00000268182,9606.ENSP00000283195,9606.ENSP00000287295,9606.ENSP00000290231,9606.ENSP00000290573,9606.ENSP00000295688,9606.ENSP00000297338,9606.ENSP00000299300,…	PSMC4,EIF3D,PHF5A,STAG2,NUP107,THOC2,LMNB1,NUP133,CSNK2A2,TMTC3,TMPO,IQGAP1,RANBP2,AIFM1,NCOA5,HK2,CCT3,RAD21,CCT2,PDS5A,HCFC1,PSMD2,NUP98,TCP1,INTS3,SMC1A,TRIM25,KARS,AP2A2,EIF3C,DYNC1H1,SPTBN1,CHD4,STAT1,CTNNBL1,AHCTF1,NES,RBM15,FLNA,IFIT1,SPTAN1,RPRD1B,ITPR3,NCBP1,EXOSC10,AHNAK,RBBP7,MX1,KDM1A,XPO1,IMMT,MECP2,SMARCA4,TOP2B,TOP2A,EIF4G1,FLNB,DDX42,DGAT1
GO:0033365	protein localization to organelle	0.041	9606.ENSP00000229179,9606.ENSP00000261396,9606.ENSP00000283195,9606.ENSP00000290573,9606.ENSP00000297338,9606.ENSP00000312066,9606.ENSP00000316032,9606.ENSP00000384863	NUP107,NUP133,RANBP2,HK2,RAD21,SRP68,NUP98,XPO1
GO:0042254	ribosome biogenesis	0.0423	9606.ENSP00000253107,9606.ENSP00000364037,9606.ENSP00000366135,9606.ENSP00000384863,9606.ENSP00000396673	PPAN,TEX10,EXOSC10,XPO1,FTSJ3
GO:0045786	negative regulation of cell cycle	0.0429	9606.ENSP00000218089,9606.ENSP00000297338,9606.ENSP00000318641,9606.ENSP00000323421,9606.ENSP00000369424,9606.ENSP00000396704,9606.ENSP00000411532	STAG2,RAD21,INTS3,SMC1A,RBBP7,TOP2B,TOP2A
GO:0090068	positive regulation of cell cycle process	0.0437	9606.ENSP00000283195,9606.ENSP00000297338,9606.ENSP00000348965,9606.ENSP00000395535,9606.ENSP00000416255	RANBP2,RAD21,DYNC1H1,MECP2,EIF4G1
GO:0045069	regulation of viral genome replication	0.0443	9606.ENSP00000360869,9606.ENSP00000381601,9606.ENSP00000411532	IFIT1,MX1,TOP2A
GO:0048524	positive regulation of viral process	0.0443	9606.ENSP00000360869,9606.ENSP00000395654,9606.ENSP00000411532	IFIT1,SMARCA4,TOP2A
GO:0016579	protein deubiquitination	0.0444	9606.ENSP00000044462,9606.ENSP00000157812,9606.ENSP00000215071,9606.ENSP00000309555,9606.ENSP00000310129	PSMA4,PSMC4,PSMD8,HCFC1,PSMD2
GO:0070201	regulation of establishment of protein localization	0.0444	9606.ENSP00000245838,9606.ENSP00000295688,9606.ENSP00000299300,9606.ENSP00000317334,9606.ENSP00000325448,9606.ENSP00000349259,9606.ENSP00000363435,9606.ENSP00000384863	THOC2,CCT3,CCT2,TCP1,KARS,SPTBN1,ITPR3,XPO1
GO:0072594	establishment of protein localization to organelle	0.0455	9606.ENSP00000229179,9606.ENSP00000261396,9606.ENSP00000283195,9606.ENSP00000290573,9606.ENSP00000312066,9606.ENSP00000316032	NUP107,NUP133,RANBP2,HK2,SRP68,NUP98
GO:0006379	mRNA cleavage	0.0456	9606.ENSP00000315791,9606.ENSP00000364289	CSTF3,NCBP1
GO:0048518	positive regulation of biological process	0.0456	9606.ENSP00000157812,9606.ENSP00000216190,9606.ENSP00000216252,9606.ENSP00000266712,9606.ENSP00000268182,9606.ENSP00000283195,9606.ENSP00000287295,9606.ENSP00000290573,9606.ENSP00000295688,9606.ENSP00000297338,9606.ENSP00000299300,9606.ENSP00000309555,9606.ENSP00000316032,9606.ENSP00000317334,9606.ENSP00000323889,9606.ENSP00000325448,9606.ENSP00000332604,9606.ENSP00000348965,9606.ENSP00000349259,…	PSMC4,EIF3D,PHF5A,TMTC3,IQGAP1,RANBP2,AIFM1,HK2,CCT3,RAD21,CCT2,HCFC1,NUP98,TCP1,TRIM25,KARS,EIF3C,DYNC1H1,SPTBN1,STAT1,CTNNBL1,NES,RBM15,FLNA,IFIT1,RPRD1B,ITPR3,NCBP1,KDM1A,MECP2,SMARCA4,TOP2A,EIF4G1
GO:0006888	endoplasmic reticulum to Golgi vesicle-mediated transport	0.0469	9606.ENSP00000343405,9606.ENSP00000348965,9606.ENSP00000349259,9606.ENSP00000361824	SEC24C,DYNC1H1,SPTBN1,SPTAN1
GO:0016073	snRNA metabolic process	0.0469	9606.ENSP00000318641,9606.ENSP00000362532,9606.ENSP00000364289	INTS3,RPRD1B,NCBP1
