# Supplementary material for: BAZ2A-RNA mediated association with TOP2A and KDM1A represses genes implicated in prostate cancer
Source: Life Sci Alliance. 2023 Apr 25;6(7):e202301950. doi: 10.26508/lsa.202301950 (PMC10130768; doi:10.26508/lsa.202301950)
Supplement: Supplementary file 10 [file LSA-2023-01950_TableS5.xlsx]

## Sheet: Genes repressed in Primary_PCa
BAZ2A-TAM_repressed in BAZ2A_High primary PCa	BAZ2A-TAM_repressed_in BAZ2A_TOP2A_High primary PCa	BAZ2A-TAM_repressed_in BAZ2A_KDM1A_High primary PCa	BAZ2A-TAM_repressed_in BAZ2A_KDM1A_ and BAZ2A_TOP2A_High primary PCa
KRT81	KRT81	WFS1	KRT81
CSRP1	CSRP1	CLTB	CSRP1
USP2	USP2	PCYT2	USP2
S100A16	S100A16	DGKA	S100A16
WFS1	WFS1	PREB	WFS1
FLNA	FLNA	EEF2K	FLNA
SEMA3B	SEMA3B	ADAM15	SEMA3B
DGKA	DGKA	SEMA3B	DGKA
PLP2	PLP2	CSRP1	PLP2
FHL2	FHL2	CTSD	FHL2
CLTB	CLTB	CYB561	CLTB
CDKN1A	CDKN1A	TRIM47	CDKN1A
GPRC5C	GPRC5C	AUP1	GPRC5C
ZNF185	ZNF185	SFXN3	ZNF185
HR	HR	BCAR3	HR
PDE2A	PDE2A	MVK	PDE2A
MYO15B	MYO15B	KRT18	MYO15B
MVK	MVK	SLC1A4	MVK
THBD	THBD	CDKN1A	THBD
ITGB4	ITGB4	S100A16	ITGB4
SLC12A4	SLC12A4	FHL2	SLC12A4
CYB561	CYB561	CD9	CYB561
SFXN3	SFXN3	PLP2	SFXN3
KRT18	KRT18	PLEKHA6	KRT18
PCYT2	PCYT2	SLC12A4	PCYT2
LOXL1	LOXL1	CCDC88B	LOXL1
ENTPD6	ENTPD6	NCLN	ENTPD6
TMEM205	TMEM205	LOXL1	TMEM205
MFSD10	MFSD10	B3GNT1	MFSD10
CD9	CD9	MAP3K14	CD9
TRIM47	TRIM47	THBD	TRIM47
GALE	GALE	TMEM214	GALE
KIAA1644	KIAA1644	MFSD10	KIAA1644
AUP1	AUP1	MYO15B	AUP1
SLC48A1	SLC48A1	CARS	SLC48A1
TMEM214	TMEM214	GPRC5C	TMEM214
CCDC86	CCDC86	POR	CCDC86
P4HB	P4HB	GALE	P4HB
QSOX1	QSOX1	PPL	QSOX1
COQ9	COQ9	HR	COQ9
PC	PC	QSOX1	PC
NGEF	NGEF	ENTPD6	NGEF
PPL	PPL	TMEM205	PPL
PREB	PREB	ITGB5	PREB
EEF2K	EEF2K	EXOC3	EEF2K
PTDSS2	PTDSS2	PPP2R2C	PTDSS2
CTSD	CTSD	CAMKK1	CTSD
PRKCSH	PRKCSH	SEC61A1	PRKCSH
GOT2	GOT2	AXL	GOT2
SLC25A23	SLC25A23	ZNF185	SLC25A23
PLEKHA6	PLEKHA6	RNPEPL1	PLEKHA6
GPR153	GPR153	PTGES2	GPR153
HPCAL1	HPCAL1	CCDC86	HPCAL1
BCAR3	BCAR3	MAP2K3	BCAR3
SLC1A4	SLC1A4	INF2	SLC1A4
MAP2K3	MAP2K3	ITGB4	MAP2K3
SNAI1	SNAI1	SLC6A9	SNAI1
NCLN	NCLN	P4HB	NCLN
RNPEPL1	RNPEPL1	SERPINB1	RNPEPL1
B3GNT1	B3GNT1	CLCN7	B3GNT1
PTGES2	PTGES2	PLA2G15	PTGES2
POR	POR	GPR153	POR
MAP3K14	MAP3K14	FAM134A	MAP3K14
AXL	AXL	SNAI1	AXL
PPP2R2C	PPP2R2C	ALAS1	PPP2R2C
NOP16	NOP16	COQ9	NOP16
ITGB5	ITGB5	NGEF	ITGB5
INF2	INF2	NOP16	INF2
TIMM44	TIMM44	ENO2	TIMM44
SERPINB1	SERPINB1	TSPAN15	SERPINB1
CLCN7	CLCN7	SLC48A1	CLCN7
PLA2G15	PLA2G15	PC	PLA2G15
ENO2	ENO2	FLNA	ENO2
FAM134A	FAM134A	SLC25A23	FAM134A
EXOC3	EXOC3	PDE2A	EXOC3
SEC61A1	SEC61A1	PTDSS2	SEC61A1
CARS	CARS	HPCAL1	CARS
ADAM15	ADAM15	PRR15	ADAM15
ALAS1	ALAS1	USP2	ALAS1
TNS4	TNS4	KIAA1644
TFF1	TFF1	PRKCSH
ARHGEF4	ARHGEF4	TIMM44
PYGB	PYGB	KRT81
B3GNT3	B3GNT3	GOT2
FA2H	FA2H
SGSH	SGSH
FLOT2	FLOT2
PSEN2	PSEN2
SAMD10	SAMD10
SLC27A4	SLC27A4
PRMT7	PRMT7
UFD1L	UFD1L
CENPT	CENPT
VAC14	VAC14
ACD	ACD
MED24	MED24
DDX56	DDX56
EEPD1	EEPD1
UBA1	UBA1
FARSA	FARSA
PUS1	PUS1
DLGAP4	DLGAP4
TBRG4
CYC1
TSPAN15
PRR15
CPNE7
SLC6A9
RANGAP1
DNTTIP1
CCDC88B
HSF1
CAMKK1

## Sheet: Primary
GO dTAM-repressed in BAZ2A/TOP2A_high and BAZ2A/KDM1A_high_primary_PCa	Count	%	PValue	Genes
GO:0030168~platelet activation	6	8	0.00010523	THBD, CSRP1, AXL, DGKA, CD9, FLNA
GO:0044710~single-organism metabolic process	29	38.6667	0.000241408	BCAR3, ALAS1, MVK, DGKA, HR, AUP1, ENO2, LOXL1, PTDSS2, SLC25A23, MAP2K3, PCYT2, PTGES2, WFS1, PDE2A, GOT2, ENTPD6, COQ9, PLA2G15, POR, GALE, PC, ADAM15, SNAI1, SFXN3, CD9, P4HB, MAP3K14, CYB561
GO:0042060~wound healing	9	12	0.000489441	THBD, CDKN1A, CSRP1, ADAM15, AXL, DGKA, CD9, FLNA, PPL
GO:0009611~response to wounding	10	13.3333	0.000513577	THBD, CDKN1A, CSRP1, ADAM15, ITGB4, AXL, DGKA, CD9, FLNA, PPL
GO:0050878~regulation of body fluid levels	8	10.6667	0.000600724	THBD, CSRP1, WFS1, AXL, DGKA, GOT2, CD9, FLNA
GO:0009628~response to abiotic stimulus	13	17.3333	0.00113077	CDKN1A, ALAS1, USP2, PDE2A, PPL, CLCN7, THBD, EEF2K, ADAM15, CD9, P4HB, SLC25A23, MAP3K14
GO:0007596~blood coagulation	6	8	0.00129344	THBD, CSRP1, AXL, DGKA, CD9, FLNA
GO:1901700~response to oxygen-containing compound	16	21.3333	0.00134768	MAP2K3, BCAR3, CDKN1A, ALAS1, PDE2A, GOT2, ENO2, LOXL1, THBD, POR, KRT18, EEF2K, ADAM15, AXL, CD9, CTSD
GO:0007599~hemostasis	6	8	0.00150408	THBD, CSRP1, AXL, DGKA, CD9, FLNA
GO:0050817~coagulation	6	8	0.00153208	THBD, CSRP1, AXL, DGKA, CD9, FLNA
GO:0010033~response to organic substance	23	30.6667	0.00158883	MAP2K3, BCAR3, CDKN1A, ALAS1, ITGB5, WFS1, PDE2A, GOT2, FHL2, AUP1, ENO2, LOXL1, SEC61A1, THBD, POR, KRT18, EEF2K, ADAM15, AXL, CD9, P4HB, PLP2, CTSD
GO:0044283~small molecule biosynthetic process	8	10.6667	0.00364341	POR, PC, MVK, PTGES2, GOT2, SNAI1, COQ9, ENO2
GO:0006575~cellular modified amino acid metabolic process	5	6.66667	0.00410345	PLA2G15, PTDSS2, PTGES2, GOT2, P4HB
GO:0042221~response to chemical	28	37.3333	0.00418862	BCAR3, CDKN1A, ALAS1, ITGB5, SEMA3B, FHL2, AUP1, ENO2, LOXL1, THBD, SEC61A1, EEF2K, S100A16, SLC25A23, CTSD, MAP2K3, WFS1, PDE2A, GOT2, ENTPD6, MFSD10, POR, KRT18, ADAM15, AXL, CD9, P4HB, PLP2
GO:0044699~single-organism process	62	82.6667	0.00472237	BCAR3, SLC48A1, CDKN1A, ALAS1, ITGB5, PRKCSH, ITGB4, DGKA, FHL2, HR, AUP1, ENO2, LOXL1, THBD, SEC61A1, EEF2K, CSRP1, QSOX1, CTSD, MAP2K3, SERPINB1, PCYT2, USP2, ENTPD6, MFSD10, PLA2G15, POR, INF2, ADAM15, TMEM214, EXOC3, PREB, GPRC5C, NGEF, KRT81, MVK, SEMA3B, SLC1A4, PPL, PTDSS2, GPR153, FLNA, SLC25A23, SLC12A4, PTGES2, WFS1, PDE2A, GOT2, TIMM44, COQ9, CLCN7, GALE, KRT18, PC, AXL, SFXN3, SNAI1, …
GO:0044711~single-organism biosynthetic process	13	17.3333	0.00686906	PCYT2, ALAS1, MVK, PTGES2, DGKA, GOT2, COQ9, ENO2, PLA2G15, PTDSS2, POR, PC, SNAI1
GO:0019637~organophosphate metabolic process	11	14.6667	0.00757745	PLA2G15, PTDSS2, PC, MVK, PCYT2, DGKA, PDE2A, ENTPD6, COQ9, ENO2, SLC25A23
GO:0031099~regeneration	5	6.66667	0.00801118	CDKN1A, ADAM15, AXL, CD9, FLNA
GO:0044763~single-organism cellular process	53	70.6667	0.00903537	BCAR3, CDKN1A, ALAS1, ITGB5, ITGB4, DGKA, FHL2, HR, AUP1, ENO2, LOXL1, THBD, SEC61A1, EEF2K, CSRP1, QSOX1, CTSD, MAP2K3, PCYT2, USP2, ENTPD6, MFSD10, PLA2G15, POR, INF2, ADAM15, TMEM214, EXOC3, PREB, NGEF, KRT81, MVK, SEMA3B, SLC1A4, PPL, PTDSS2, FLNA, SLC25A23, SLC12A4, PTGES2, WFS1, PDE2A, GOT2, COQ9, KRT18, PC, AXL, SFXN3, SNAI1, CD9, P4HB, MAP3K14, CYB561
GO:0044712~single-organism catabolic process	10	13.3333	0.00951279	PLA2G15, GALE, POR, ADAM15, WFS1, PDE2A, GOT2, ENTPD6, AUP1, ENO2
GO:0007229~integrin-mediated signaling pathway	4	5.33333	0.0097423	ITGB5, ADAM15, ITGB4, FLNA
GO:0031589~cell-substrate adhesion	6	8	0.010945	ITGB5, ADAM15, ITGB4, AXL, FLNA, P4HB
GO:0008610~lipid biosynthetic process	8	10.6667	0.0120177	PLA2G15, PTDSS2, POR, MVK, PCYT2, PTGES2, DGKA, SNAI1
GO:0009888~tissue development	15	20	0.0121682	KRT81, CDKN1A, ITGB5, ITGB4, PDE2A, SEMA3B, FHL2, PPL, POR, KRT18, ADAM15, CSRP1, SNAI1, CD9, FLNA
GO:0044281~small molecule metabolic process	15	20	0.0144527	MVK, PTGES2, PDE2A, GOT2, ENTPD6, COQ9, ENO2, PLA2G15, POR, GALE, PC, SNAI1, SFXN3, P4HB, SLC25A23
GO:0060548~negative regulation of cell death	10	13.3333	0.0150096	CDKN1A, POR, EEF2K, KRT18, WFS1, AXL, FHL2, SNAI1, FLNA, ENO2
GO:0048513~animal organ development	22	29.3333	0.0153977	MAP2K3, BCAR3, KRT81, CDKN1A, ALAS1, WFS1, ITGB4, PRKCSH, USP2, PDE2A, GOT2, SEMA3B, FHL2, PPL, SEC61A1, POR, KRT18, ADAM15, AXL, SNAI1, CD9, FLNA
GO:0010543~regulation of platelet activation	3	4	0.0155065	THBD, CD9, FLNA
GO:0050896~response to stimulus	44	58.6667	0.0165034	BCAR3, CDKN1A, ALAS1, MVK, ITGB5, PRKCSH, ITGB4, DGKA, SEMA3B, FHL2, AUP1, ENO2, PPL, LOXL1, THBD, SEC61A1, EEF2K, NCLN, GPR153, CSRP1, S100A16, FLNA, SLC25A23, CTSD, MAP2K3, WFS1, USP2, PDE2A, GOT2, ENTPD6, MFSD10, CLCN7, POR, KRT18, INF2, ADAM15, AXL, SNAI1, CD9, P4HB, PLP2, GPRC5C, MAP3K14, NGEF
GO:0043066~negative regulation of apoptotic process	9	12	0.0196792	CDKN1A, POR, EEF2K, KRT18, WFS1, AXL, FHL2, SNAI1, FLNA
GO:0051592~response to calcium ion	4	5.33333	0.020092	EEF2K, S100A16, ENTPD6, SLC25A23
GO:0043069~negative regulation of programmed cell death	9	12	0.0223081	CDKN1A, POR, EEF2K, KRT18, WFS1, AXL, FHL2, SNAI1, FLNA
GO:0007507~heart development	7	9.33333	0.0240446	MAP2K3, CDKN1A, ADAM15, PDE2A, FHL2, SNAI1, FLNA
GO:0070527~platelet aggregation	3	4	0.0252461	CSRP1, CD9, FLNA
GO:0006820~anion transport	7	9.33333	0.0262271	CLCN7, SLC12A4, GOT2, SFXN3, SLC1A4, SLC25A23, MFSD10
GO:0033993~response to lipid	9	12	0.026236	MAP2K3, THBD, CDKN1A, POR, ALAS1, ADAM15, AXL, ENO2, LOXL1
GO:0010769~regulation of cell morphogenesis involved in differentiation	5	6.66667	0.0280872	EEF2K, SEMA3B, FLNA, P4HB, NGEF
GO:0009605~response to external stimulus	17	22.6667	0.0296037	MAP2K3, CDKN1A, MVK, USP2, PDE2A, SEMA3B, AUP1, PPL, LOXL1, THBD, POR, KRT18, AXL, CD9, FLNA, PLP2, MAP3K14
GO:0061041~regulation of wound healing	4	5.33333	0.0309769	THBD, CDKN1A, CD9, FLNA
GO:0006796~phosphate-containing compound metabolic process	19	25.3333	0.0309776	MAP2K3, BCAR3, CDKN1A, PCYT2, MVK, DGKA, PDE2A, ENTPD6, COQ9, ENO2, PLA2G15, PTDSS2, PC, EEF2K, PPP2R2C, AXL, SLC25A23, GPRC5C, MAP3K14
GO:0042246~tissue regeneration	3	4	0.0330474	CDKN1A, ADAM15, CD9
GO:0061045~negative regulation of wound healing	3	4	0.0345553	THBD, CDKN1A, CD9
GO:0006915~apoptotic process	13	17.3333	0.0385922	CDKN1A, WFS1, FHL2, MFSD10, POR, KRT18, EEF2K, TMEM214, AXL, SNAI1, FLNA, P4HB, CTSD
GO:0009653~anatomical structure morphogenesis	17	22.6667	0.0391323	BCAR3, ITGB5, ITGB4, SEMA3B, FHL2, POR, KRT18, INF2, EEF2K, ADAM15, CSRP1, AXL, SNAI1, CD9, FLNA, P4HB, NGEF
GO:0045104~intermediate filament cytoskeleton organization	3	4	0.0392359	KRT81, KRT18, PPL
GO:1902531~regulation of intracellular signal transduction	13	17.3333	0.039245	MAP2K3, BCAR3, WFS1, USP2, PDE2A, FHL2, INF2, AXL, SNAI1, FLNA, P4HB, MAP3K14, NGEF
GO:0006793~phosphorus metabolic process	19	25.3333	0.0398742	MAP2K3, BCAR3, CDKN1A, PCYT2, MVK, DGKA, PDE2A, ENTPD6, COQ9, ENO2, PLA2G15, PTDSS2, PC, EEF2K, PPP2R2C, AXL, SLC25A23, GPRC5C, MAP3K14
GO:0045103~intermediate filament-based process	3	4	0.0400383	KRT81, KRT18, PPL
GO:1903902~positive regulation of viral life cycle	3	4	0.0416618	PC, AXL, P4HB
GO:0051701~interaction with host	4	5.33333	0.0419858	PC, ITGB5, AXL, P4HB
GO:0045017~glycerolipid biosynthetic process	4	5.33333	0.0424621	PLA2G15, PTDSS2, PCYT2, DGKA
GO:0050821~protein stabilization	4	5.33333	0.0424621	NCLN, WFS1, USP2, FLNA
GO:1903034~regulation of response to wounding	4	5.33333	0.0448849	THBD, CDKN1A, CD9, FLNA
GO:1903035~negative regulation of response to wounding	3	4	0.0449818	THBD, CDKN1A, CD9
GO:0070482~response to oxygen levels	5	6.66667	0.0473502	CDKN1A, EEF2K, ALAS1, ADAM15, P4HB
GO:0008654~phospholipid biosynthetic process	4	5.33333	0.0478817	PTDSS2, MVK, PCYT2, DGKA
GO:0034109~homotypic cell-cell adhesion	3	4	0.0483966	CSRP1, CD9, FLNA
GO:0030193~regulation of blood coagulation	3	4	0.0483966	THBD, CD9, FLNA
GO:0032989~cellular component morphogenesis	9	12	0.0494518	EEF2K, CSRP1, ITGB4, AXL, SEMA3B, CD9, FLNA, P4HB, NGEF

## Sheet: Metastatic
GO dTAM-repressed in BAZ2A/TOP2A_high and BAZ2A/KDM1A_high_metastatic_PCa	Count	%	PValue	Genes
GO:0050878~regulation of body fluid levels	8	32	3.46336e-07	THBD, CSRP1, WFS1, AXL, DGKA, GOT2, CD9, FLNA
GO:0030168~platelet activation	6	24	4.35223e-07	THBD, CSRP1, AXL, DGKA, CD9, FLNA
GO:0007596~blood coagulation	6	24	6.44589e-06	THBD, CSRP1, AXL, DGKA, CD9, FLNA
GO:0007599~hemostasis	6	24	7.61134e-06	THBD, CSRP1, AXL, DGKA, CD9, FLNA
GO:0050817~coagulation	6	24	7.76791e-06	THBD, CSRP1, AXL, DGKA, CD9, FLNA
GO:0009611~response to wounding	8	32	8.36338e-06	THBD, CSRP1, ITGB4, AXL, DGKA, CD9, FLNA, PPL
GO:0042060~wound healing	7	28	2.62538e-05	THBD, CSRP1, AXL, DGKA, CD9, FLNA, PPL
GO:0044707~single-multicellular organism process	18	72	0.000146792	BCAR3, SERPINB1, ALAS1, ITGB5, WFS1, ITGB4, DGKA, GOT2, SEMA3B, FHL2, PPL, LOXL1, THBD, KRT18, CSRP1, AXL, CD9, FLNA
GO:0032501~multicellular organismal process	19	76	0.000385538	BCAR3, SERPINB1, ALAS1, ITGB5, WFS1, ITGB4, DGKA, GOT2, SEMA3B, FHL2, SLC1A4, PPL, LOXL1, THBD, KRT18, CSRP1, AXL, CD9, FLNA
GO:0010033~response to organic substance	12	48	0.000651659	BCAR3, THBD, ALAS1, KRT18, ITGB5, WFS1, AXL, GOT2, FHL2, CD9, PLP2, LOXL1
GO:0010543~regulation of platelet activation	3	12	0.00186584	THBD, CD9, FLNA
GO:0048513~animal organ development	12	48	0.00187665	BCAR3, ALAS1, KRT18, WFS1, ITGB4, AXL, GOT2, SEMA3B, FHL2, CD9, FLNA, PPL
GO:0009888~tissue development	9	36	0.00194121	KRT18, CSRP1, ITGB5, ITGB4, SEMA3B, FHL2, CD9, FLNA, PPL
GO:0044699~single-organism process	24	96	0.00213167	BCAR3, SLC12A4, SERPINB1, ALAS1, ITGB5, WFS1, ITGB4, DGKA, GOT2, SEMA3B, FHL2, SLC1A4, COQ9, PPL, LOXL1, THBD, GALE, KRT18, CSRP1, AXL, CD9, FLNA, QSOX1, PLP2
GO:0070527~platelet aggregation	3	12	0.00311267	CSRP1, CD9, FLNA
GO:0009653~anatomical structure morphogenesis	10	40	0.00399845	BCAR3, KRT18, CSRP1, ITGB5, ITGB4, AXL, SEMA3B, FHL2, CD9, FLNA
GO:0048856~anatomical structure development	15	60	0.00401971	BCAR3, ALAS1, ITGB5, WFS1, ITGB4, GOT2, SEMA3B, FHL2, PPL, LOXL1, KRT18, CSRP1, AXL, CD9, FLNA
GO:0042221~response to chemical	13	52	0.00402518	BCAR3, ALAS1, ITGB5, WFS1, GOT2, SEMA3B, FHL2, LOXL1, THBD, KRT18, AXL, CD9, PLP2
GO:1901700~response to oxygen-containing compound	8	32	0.00402707	BCAR3, THBD, ALAS1, KRT18, AXL, GOT2, CD9, LOXL1
GO:0007275~multicellular organism development	14	56	0.00493641	BCAR3, ALAS1, ITGB5, WFS1, ITGB4, GOT2, SEMA3B, FHL2, PPL, LOXL1, KRT18, AXL, CD9, FLNA
GO:0030193~regulation of blood coagulation	3	12	0.00624344	THBD, CD9, FLNA
GO:0034109~homotypic cell-cell adhesion	3	12	0.00624344	CSRP1, CD9, FLNA
GO:1900046~regulation of hemostasis	3	12	0.0064876	THBD, CD9, FLNA
GO:0050818~regulation of coagulation	3	12	0.00698885	THBD, CD9, FLNA
GO:0048731~system development	13	52	0.00821816	BCAR3, ALAS1, WFS1, ITGB4, GOT2, SEMA3B, FHL2, PPL, LOXL1, KRT18, AXL, CD9, FLNA
GO:0044767~single-organism developmental process	15	60	0.00824725	BCAR3, ALAS1, ITGB5, WFS1, ITGB4, GOT2, SEMA3B, FHL2, PPL, LOXL1, KRT18, CSRP1, AXL, CD9, FLNA
GO:0010927~cellular component assembly involved in morphogenesis	3	12	0.00887687	CSRP1, ITGB4, CD9
GO:0007155~cell adhesion	7	28	0.00907564	KRT18, CSRP1, ITGB5, ITGB4, AXL, CD9, FLNA
GO:0044763~single-organism cellular process	21	84	0.00916085	BCAR3, SLC12A4, ALAS1, ITGB5, WFS1, ITGB4, DGKA, GOT2, SEMA3B, FHL2, SLC1A4, COQ9, PPL, LOXL1, THBD, KRT18, CSRP1, AXL, CD9, FLNA, QSOX1
GO:0022610~biological adhesion	7	28	0.00926753	KRT18, CSRP1, ITGB5, ITGB4, AXL, CD9, FLNA
GO:0007229~integrin-mediated signaling pathway	3	12	0.00960064	ITGB5, ITGB4, FLNA
GO:0032502~developmental process	15	60	0.00965455	BCAR3, ALAS1, ITGB5, WFS1, ITGB4, GOT2, SEMA3B, FHL2, PPL, LOXL1, KRT18, CSRP1, AXL, CD9, FLNA
GO:0031589~cell-substrate adhesion	4	16	0.0100368	ITGB5, ITGB4, AXL, FLNA
GO:0032989~cellular component morphogenesis	6	24	0.0103679	CSRP1, ITGB4, AXL, SEMA3B, CD9, FLNA
GO:0098602~single organism cell adhesion	5	20	0.0111484	CSRP1, ITGB5, AXL, CD9, FLNA
GO:0009605~response to external stimulus	9	36	0.0118888	THBD, KRT18, AXL, SEMA3B, CD9, FLNA, PLP2, PPL, LOXL1
GO:0001775~cell activation	6	24	0.0121109	THBD, CSRP1, AXL, DGKA, CD9, FLNA
GO:0048646~anatomical structure formation involved in morphogenesis	6	24	0.0147846	CSRP1, ITGB5, ITGB4, FHL2, CD9, FLNA
GO:0050896~response to stimulus	18	72	0.0158956	BCAR3, ALAS1, ITGB5, WFS1, ITGB4, DGKA, GOT2, SEMA3B, FHL2, PPL, LOXL1, THBD, KRT18, CSRP1, AXL, CD9, FLNA, PLP2
GO:0048468~cell development	8	32	0.0160694	ALAS1, CSRP1, ITGB4, AXL, SEMA3B, FHL2, CD9, FLNA
GO:0065008~regulation of biological quality	11	44	0.017795	THBD, SLC12A4, ALAS1, CSRP1, WFS1, AXL, DGKA, GOT2, SEMA3B, CD9, FLNA
GO:0072378~blood coagulation, fibrin clot formation	2	8	0.0188732	THBD, FLNA
GO:0061041~regulation of wound healing	3	12	0.0220699	THBD, CD9, FLNA
GO:0010544~negative regulation of platelet activation	2	8	0.0223737	THBD, CD9
GO:0030154~cell differentiation	11	44	0.0229275	ALAS1, KRT18, CSRP1, ITGB5, ITGB4, AXL, SEMA3B, FHL2, CD9, FLNA, PPL
GO:0051241~negative regulation of multicellular organismal process	6	24	0.0232716	THBD, SERPINB1, AXL, SEMA3B, CD9, FLNA
GO:0043066~negative regulation of apoptotic process	5	20	0.0256763	KRT18, WFS1, AXL, FHL2, FLNA
GO:0007565~female pregnancy	3	12	0.0264857	THBD, ITGB4, GOT2
GO:0032288~myelin assembly	2	8	0.0270226	ITGB4, CD9
GO:0043069~negative regulation of programmed cell death	5	20	0.027706	KRT18, WFS1, AXL, FHL2, FLNA
GO:0031099~regeneration	3	12	0.0288179	AXL, CD9, FLNA
GO:0050866~negative regulation of cell activation	3	12	0.0288179	THBD, AXL, CD9
GO:1903034~regulation of response to wounding	3	12	0.0290556	THBD, CD9, FLNA
GO:0098609~cell-cell adhesion	5	20	0.0296426	KRT18, CSRP1, ITGB5, CD9, FLNA
GO:0048869~cellular developmental process	11	44	0.0300521	ALAS1, KRT18, CSRP1, ITGB5, ITGB4, AXL, SEMA3B, FHL2, CD9, FLNA, PPL
GO:0040011~locomotion	7	28	0.0307984	ITGB5, ITGB4, AXL, SEMA3B, CD9, FLNA, PLP2
GO:0044706~multi-multicellular organism process	3	12	0.0337204	THBD, ITGB4, GOT2
GO:0016477~cell migration	6	24	0.0364335	ITGB5, ITGB4, AXL, SEMA3B, CD9, FLNA
GO:0022414~reproductive process	6	24	0.0394999	THBD, ITGB4, AXL, GOT2, CD9, FLNA
GO:0060548~negative regulation of cell death	5	20	0.0395285	KRT18, WFS1, AXL, FHL2, FLNA
GO:0000003~reproduction	6	24	0.0397701	THBD, ITGB4, AXL, GOT2, CD9, FLNA
GO:0044703~multi-organism reproductive process	5	20	0.0430875	THBD, ITGB4, AXL, GOT2, CD9
GO:0016337~single organismal cell-cell adhesion	4	16	0.0438381	CSRP1, ITGB5, CD9, FLNA
GO:0071526~semaphorin-plexin signaling pathway	2	8	0.0488174	SEMA3B, FLNA
GO:0034330~cell junction organization	3	12	0.0490154	ITGB4, CD9, FLNA
GO:0007166~cell surface receptor signaling pathway	8	32	0.0492748	BCAR3, KRT18, ITGB5, ITGB4, AXL, SEMA3B, FLNA, PLP2
