# Supplementary material for: BAZ2A-RNA mediated association with TOP2A and KDM1A represses genes implicated in prostate cancer
Source: Life Sci Alliance. 2023 Apr 25;6(7):e202301950. doi: 10.26508/lsa.202301950 (PMC10130768; doi:10.26508/lsa.202301950)
Supplement: Supplementary file 12 [file LSA-2023-01950_TableS7.xlsx]

## Sheet: GO_UP_KDM1Ai
GO_UP_KDM1Ai >0.58 log2FC	Count	%	PValue	Genes
GO:0044707~single-multicellular organism process	114	33.8279	0.000385314	AMHR2, NPY2R, PLEKHB1, MPL, IHH, PLAT, CLDN1, ENO3, RAPGEFL1, TGM1, RNF112, CAPN8, VSIG1, SALL4, LIPH, SCN9A, CYP1B1, ENPP4, MNX1, EPHB3, GUCY1A3, IL15RA, USP2, OMG, KRT75, NPNT, BCAN, DOPEY2, MXRA8, ADAM8, LLGL2, PDGFB, LYPD1, PDGFA, PPL, CYP27B1, TERT, NLRP3, NPTX1, CCDC141, KIAA0319, JAG2, ST14, EGR2, ACE, LRRN4, TRPV3, NBEAL2, CCDC88B, FA2H, GJB2, ARTN, IL7, CYP1A1, SNAI1, CSPG5, NOX5, MKX, I…
GO:0043588~skin development	12	3.56083	0.000741345	TGM1, FA2H, CYP27B1, ST14, SHH, ITGB4, SNAI1, PDGFA, FLNB, GRHL1, CLDN1, PPL
GO:0044763~single-organism cellular process	202	59.9407	0.000850225	SLC23A3, CYFIP2, GLDC, CPNE7, PLEKHB1, CLDN1, ENO3, RAPGEFL1, NIPAL4, RNF112, VSIG1, WDR93, CYP1B1, TNS4, MNX1, EPHB3, SLC34A3, IL15RA, EPHA6, NUP210, OMG, ASRGL1, BCAN, ABCA10, CLDN3, GPR160, ERVW-1, MXRA8, LLGL2, GRB7, EPHA10, PDGFB, LYPD1, PDGFA, MST1R, PPL, CYP27B1, TERT, ARSG, TSPAN1, JAG2, ST14, EGR2, ACE, ABCA3, RAB39B, NBEAL2, PILRB, CCDC88B, FA2H, GJB2, OCLN, ARTN, WNK2, CYP1A1, SNAI1, N…
GO:0010543~regulation of platelet activation	5	1.48368	0.000912928	THBD, DMTN, TEC, PDGFB, PDGFA
GO:0009888~tissue development	43	12.7596	0.00096758	SEMA3C, ITGB4, IHH, PDGFB, PDGFA, ATP2C2, ENO3, PPL, KRT83, TGM1, CYP27B1, SHH, PARD6A, VSIG1, ERBB3, EPCAM, SALL4, CYP1B1, FLNB, TNNI3, JAG2, EGR2, ST14, AKR1C1, USP2, COBL, AKR1C2, WNT7A, PAX5, FOS, WNT9A, GRHL1, NPNT, FA2H, GJB2, CLDN3, TEC, DHRS9, ARTN, COL7A1, CYP1A1, SNAI1, CRELD1
GO:0034330~cell junction organization	12	3.56083	0.00115145	GJB2, OCLN, ACE, CLDN3, PARD6A, DMTN, ITGB4, SNAI1, CDH15, GRHL1, CLDN1, PLEKHA7
GO:1900046~regulation of hemostasis	7	2.07715	0.00145768	THBD, DMTN, TEC, PDGFB, PDGFA, ENPP4, PLAT
GO:0030193~regulation of blood coagulation	7	2.07715	0.00145768	THBD, DMTN, TEC, PDGFB, PDGFA, ENPP4, PLAT
GO:0008544~epidermis development	13	3.85757	0.00162361	JAG2, ST14, PDGFA, GRHL1, PPL, KRT83, TGM1, FA2H, CYP27B1, SHH, COL7A1, SNAI1, FLNB
GO:0044699~single-organism process	215	63.7982	0.00172203	SLC23A3, CYFIP2, GLDC, CPNE7, PLEKHB1, CLDN1, ENO3, RAPGEFL1, NIPAL4, RNF112, VSIG1, WDR93, LIPH, CYP1B1, TNS4, MNX1, EPHB3, SLC34A3, IL15RA, EPHA6, NUP210, OMG, ASRGL1, DOPEY2, BCAN, ABCA10, CLDN3, GPR160, ERVW-1, MXRA8, LLGL2, GRB7, EPHA10, PDGFB, LYPD1, PDGFA, MST1R, PPL, CYP27B1, CRACR2B, TERT, ARSG, TSPAN1, JAG2, ST14, EGR2, ACE, ABCA3, LRRN4, RAB39B, NBEAL2, PILRB, CCDC88B, FA2H, GJB2, OCLN…
GO:0050818~regulation of coagulation	7	2.07715	0.00196158	THBD, DMTN, TEC, PDGFB, PDGFA, ENPP4, PLAT
GO:0007586~digestion	9	2.67062	0.0028095	CAPN8, ACE, MUC2, VSIG1, LIPH, AKR1C1, TFF2, AKR1C2, TFF1
GO:1903726~negative regulation of phospholipid metabolic process	3	0.890208	0.00427613	PDGFB, PDGFA, WASH1
GO:0045216~cell-cell junction organization	10	2.96736	0.00494169	GJB2, OCLN, ACE, CLDN3, PARD6A, DMTN, CDH15, GRHL1, CLDN1, PLEKHA7
GO:0045621~positive regulation of lymphocyte differentiation	6	1.78042	0.00672643	IL15RA, SHH, IL7, IHH, NLRP3, ADAM8
GO:0060429~epithelium development	27	8.01187	0.00692479	SEMA3C, IHH, PDGFB, PDGFA, ATP2C2, PPL, TGM1, CYP27B1, SHH, PARD6A, VSIG1, EPCAM, SALL4, FLNB, JAG2, ST14, AKR1C1, COBL, AKR1C2, WNT7A, GRHL1, NPNT, FA2H, CLDN3, DHRS9, CYP1A1, SNAI1
GO:0034329~cell junction assembly	9	2.67062	0.00745964	GJB2, OCLN, ACE, CLDN3, PARD6A, DMTN, ITGB4, SNAI1, CLDN1
GO:0008202~steroid metabolic process	11	3.26409	0.00768972	SLCO1C1, CYP27B1, DHRS9, AKR1C1, CYP1A1, SNAI1, CYP1B1, LCAT, AKR1C2, SLC27A2, TM7SF2
GO:0032501~multicellular organismal process	123	36.4985	0.00812128	AMHR2, NPY2R, PLEKHB1, MPL, IHH, PLAT, CLDN1, ENO3, RAPGEFL1, TGM1, RNF112, CAPN8, VSIG1, SALL4, LIPH, SCN9A, CYP1B1, ENPP4, MNX1, EPHB3, GUCY1A3, IL15RA, USP2, OMG, KRT75, NPNT, GRIP2, BCAN, DOPEY2, MXRA8, ADAM8, LLGL2, PDGFB, LYPD1, PDGFA, PPL, CYP27B1, TERT, NLRP3, NPTX1, CCDC141, KIAA0319, JAG2, ST14, EGR2, PRRT2, ACE, LRRN4, TRPV3, NBEAL2, CCDC88B, FA2H, GJB2, ARTN, IL7, CYP1A1, SNAI1, CSPG5…
GO:0007043~cell-cell junction assembly	6	1.78042	0.00862249	GJB2, OCLN, ACE, CLDN3, PARD6A, CLDN1
GO:0006940~regulation of smooth muscle contraction	5	1.48368	0.00909896	GUCY1A3, NPY2R, TNNI3, ADRA1B, NPNT
GO:0040017~positive regulation of locomotion	14	4.1543	0.00962477	CCL24, GRB7, DMTN, SEMA3C, PDGFB, PDGFA, WNT7A, TERT, CEACAM6, EPCAM, ARTN, SNAI1, ADAM8, WASH1
GO:0048534~hematopoietic or lymphoid organ development	21	6.23145	0.0106828	JAG2, IL15RA, RBM47, ACE, DMTN, PDGFB, IHH, NBEAL2, FOS, STON2, LILRB3, KRT75, SMPD3, SHH, IL7, ARTN, IFNE, NLRP3, ADAM8, P4HTM, EPHB3
GO:0035791~platelet-derived growth factor receptor-beta signaling pathway	3	0.890208	0.0107749	PDGFB, PDGFA, PDGFRL
GO:0033089~positive regulation of T cell differentiation in thymus	3	0.890208	0.0107749	SHH, IHH, ADAM8
GO:2000400~positive regulation of thymocyte aggregation	3	0.890208	0.0107749	SHH, IHH, ADAM8
GO:0061041~regulation of wound healing	7	2.07715	0.011455	THBD, DMTN, TEC, PDGFB, PDGFA, ENPP4, PLAT
GO:1902107~positive regulation of leukocyte differentiation	7	2.07715	0.0127349	IL15RA, SHH, IL7, IHH, NLRP3, ADAM8, FOS
GO:0042574~retinal metabolic process	3	0.890208	0.012806	SDR16C5, AKR1C1, CYP1B1
GO:0048856~anatomical structure development	98	29.0801	0.0135597	AMHR2, NPY2R, PLEKHB1, IHH, CLDN1, ENO3, RAPGEFL1, TGM1, RNF112, VSIG1, SALL4, SCN9A, CYP1B1, MNX1, EPHB3, IL15RA, USP2, OMG, KRT75, NPNT, BCAN, DOPEY2, CLDN3, MXRA8, ERVW-1, ADAM8, LLGL2, PDGFB, PDGFA, PPL, CYP27B1, TERT, NLRP3, NPTX1, CCDC141, KIAA0319, JAG2, ST14, EGR2, ACE, NBEAL2, FA2H, GJB2, ARTN, IL7, CYP1A1, SNAI1, CSPG5, NOX5, MKX, ITGB4, TNFAIP2, STON2, PPP1R9A, ADRA1B, SMPD3, SHH, COBL…
GO:0042633~hair cycle	6	1.78042	0.0140313	SHH, TERT, SNAI1, TRPV3, PDGFA, KRT83
GO:0042303~molting cycle	6	1.78042	0.0140313	SHH, TERT, SNAI1, TRPV3, PDGFA, KRT83
GO:0002376~immune system process	50	14.8368	0.0147628	RAB3B, CYFIP2, MPL, IHH, STON2, SMPD3, THBD, SHH, LAMP3, MNX1, EPHB3, IL15RA, FOS, PAX5, KRT75, LIME1, LAT2, HSH2D, CEACAM6, IFNE, MZB1, TNFRSF25, ADAM8, SMPDL3B, BIRC3, GRB7, RBM47, SEMA3C, PDGFB, MST1R, CYP27B1, NLRP3, P4HTM, JAG2, CCL24, ACE, DMTN, NBEAL2, LILRB3, SCART1, MAPK10, CCDC88B, TEC, ARTN, IL7, CD7, SARM1, PIK3AP1, ULBP1, CD22
GO:0009913~epidermal cell differentiation	8	2.37389	0.0160263	JAG2, TGM1, FA2H, CYP27B1, ST14, FLNB, GRHL1, PPL
GO:2000147~positive regulation of cell motility	13	3.85757	0.0177166	CCL24, GRB7, DMTN, SEMA3C, PDGFB, PDGFA, WNT7A, TERT, CEACAM6, EPCAM, SNAI1, ADAM8, WASH1
GO:0002244~hematopoietic progenitor cell differentiation	6	1.78042	0.0177734	SMPD3, SHH, RBM47, ACE, STON2, KRT75
GO:0070830~bicellular tight junction assembly	4	1.18694	0.0179677	OCLN, CLDN3, PARD6A, CLDN1
GO:0002520~immune system development	21	6.23145	0.0183066	JAG2, IL15RA, RBM47, ACE, DMTN, PDGFB, IHH, NBEAL2, FOS, STON2, LILRB3, KRT75, SMPD3, SHH, IL7, ARTN, IFNE, NLRP3, ADAM8, P4HTM, EPHB3
GO:0045582~positive regulation of T cell differentiation	5	1.48368	0.0184961	SHH, IL7, IHH, NLRP3, ADAM8
GO:0030855~epithelial cell differentiation	16	4.74777	0.0189507	JAG2, ST14, AKR1C1, PDGFB, AKR1C2, WNT7A, GRHL1, PPL, TGM1, FA2H, CYP27B1, CLDN3, VSIG1, DHRS9, CYP1A1, FLNB
GO:0042448~progesterone metabolic process	3	0.890208	0.0197943	DHRS9, AKR1C1, AKR1C2
GO:0034754~cellular hormone metabolic process	6	1.78042	0.0206033	SDR16C5, SHH, DHRS9, AKR1C1, CYP1B1, AKR1C2
GO:0048513~animal organ development	60	17.8042	0.0207105	AMHR2, ITGB4, NPY2R, IHH, STON2, ENO3, CLDN1, TGM1, SMPD3, SHH, SALL4, CYP1B1, MNX1, EPHB3, IL15RA, USP2, COBL, FOS, WNT9A, PAX5, KRT75, NPNT, BCAN, IFNE, ADAM8, CRELD1, ITGB1BP2, RBM47, SEMA3C, PDGFB, PDGFA, ATP2C2, PPL, SLC25A27, CYP27B1, PARD6A, ERBB3, EPCAM, HSF4, NLRP3, FLNB, TNNI3, CCDC141, P4HTM, JAG2, EGR2, ST14, ACE, DMTN, WNT7A, NBEAL2, GRHL1, LILRB3, FA2H, GJB2, ARTN, IL7, CYP1A1, SNAI…
GO:0006820~anion transport	14	4.1543	0.0208383	GABRQ, SLC34A3, ACE, SLC13A4, AKR1C1, SLC4A11, SLC3A1, BEST3, CLCN1, SLCO1C1, GLRB, SLCO4A1, CYB5RL, SLC27A2
GO:1903034~regulation of response to wounding	7	2.07715	0.0212841	THBD, DMTN, TEC, PDGFB, PDGFA, ENPP4, PLAT
GO:0051272~positive regulation of cellular component movement	13	3.85757	0.0213474	CCL24, GRB7, DMTN, SEMA3C, PDGFB, PDGFA, WNT7A, TERT, CEACAM6, EPCAM, SNAI1, ADAM8, WASH1
GO:0010544~negative regulation of platelet activation	3	0.890208	0.0224063	THBD, PDGFB, PDGFA
GO:0030277~maintenance of gastrointestinal epithelium	3	0.890208	0.0224063	MUC2, VSIG1, TFF1
GO:0015698~inorganic anion transport	7	2.07715	0.0225716	GABRQ, SLC34A3, SLC13A4, GLRB, SLC4A11, BEST3, CLCN1
GO:0051239~regulation of multicellular organismal process	52	15.4303	0.0239266	NPY2R, IHH, PLAT, ADRA1B, PPP1R9A, THBD, RNF112, SHH, CYP1B1, ENPP4, EPHB3, GUCY1A3, IL15RA, USP2, OMG, COBL, FOS, WNT9A, NPNT, ADAM8, BIRC3, SEMA3C, PDGFB, PDGFA, LCAT, CACNG6, CYP27B1, PARD6A, ERBB3, TERT, NLRP3, TNNI3, KIAA0319, P4HTM, CCL24, EGR2, ACE, DMTN, KCNJ11, WNT7A, TRPV3, GRHL1, LILRB3, MAPK13, CCDC88B, FA2H, TEC, SYT11, IL7, SARM1, SNAI1, NOX5
GO:0030097~hemopoiesis	19	5.63798	0.0243803	JAG2, IL15RA, RBM47, ACE, DMTN, PDGFB, IHH, NBEAL2, FOS, STON2, LILRB3, KRT75, SMPD3, SHH, IL7, IFNE, NLRP3, ADAM8, P4HTM
GO:0030198~extracellular matrix organization	11	3.26409	0.0258599	BCAN, TNXB, ITGB4, COL7A1, PDGFB, PDGFA, CYP1B1, ADAM8, WASH1, NPNT, MUC5AC
GO:0098661~inorganic anion transmembrane transport	6	1.78042	0.0262334	GABRQ, SLC34A3, GLRB, SLC4A11, BEST3, CLCN1
GO:0043062~extracellular structure organization	11	3.26409	0.0262733	BCAN, TNXB, ITGB4, COL7A1, PDGFB, PDGFA, CYP1B1, ADAM8, WASH1, NPNT, MUC5AC
GO:0065008~regulation of biological quality	66	19.5846	0.0266244	RAB3B, NPY2R, MPL, PLAT, ADRA1B, PPP1R9A, CLDN1, SMPD3, THBD, SDR16C5, SHH, VSIG1, SCN9A, CYP1B1, KPNA7, WASH1, ENPP4, EPHB3, GUCY1A3, SLC34A3, USP2, GRIP2, MUC5AC, SLCO1C1, HSH2D, SLCO4A1, SCN4A, ADAM8, TFF1, SHANK2, SEMA3C, PDGFB, PDGFA, LCAT, ATP2C2, CLCN1, SLC25A27, CYP27B1, MUC2, TERT, FLNB, TNNI3, P4HTM, TSPAN1, CCL24, EGR2, ACE, DMTN, KCNJ11, GAD1, AKR1C1, WNT7A, AKR1C2, SLC4A11, GRHL1, A1…
GO:0001775~cell activation	22	6.52819	0.0266811	JAG2, IL15RA, DMTN, MPL, PDGFB, LYPD1, IHH, PDGFA, WNT7A, CCDC88B, LAT2, THBD, SHH, HSH2D, TEC, IL7, IFNE, CD7, MZB1, NLRP3, ADAM8, ULBP1
GO:0006665~sphingolipid metabolic process	7	2.07715	0.0267461	SMPD3, FA2H, ST6GALNAC1, ARSG, A4GALT, SMPDL3B, SGPP2
GO:0061061~muscle structure development	16	4.74777	0.0271918	EGR2, MYEF2, SORT1, USP2, PDGFB, FOS, PAX5, NPNT, SHH, ERBB3, CEACAM5, TNNI3, FLNB, MKX, ITGB1BP2, CDH15
GO:0030908~protein splicing	2	0.593472	0.0290859	SHH, IHH
GO:0010512~negative regulation of phosphatidylinositol biosynthetic process	2	0.593472	0.0290859	PDGFB, PDGFA
GO:0016539~intein-mediated protein splicing	2	0.593472	0.0290859	SHH, IHH
GO:0042060~wound healing	15	4.45104	0.0291191	DMTN, MPL, PDGFB, PDGFA, WNT7A, PLAT, ENO3, THBD, SHH, TEC, ERBB3, SYT11, TFF2, TFF1, ENPP4
GO:0007169~transmembrane receptor protein tyrosine kinase signaling pathway	17	5.04451	0.0294693	CYFIP2, GRB7, EPHA6, EPHA10, SORT1, PDGFB, PDGFA, PILRB, PLAT, MST1R, PDGFRL, MAPK13, CNKSR1, TEC, ERBB3, CD7, EPHB3
GO:0032502~developmental process	98	29.0801	0.029593	AMHR2, NPY2R, PLEKHB1, IHH, CLDN1, ENO3, RAPGEFL1, TGM1, RNF112, VSIG1, SALL4, SCN9A, CYP1B1, MNX1, EPHB3, IL15RA, USP2, OMG, KRT75, NPNT, BCAN, DOPEY2, CLDN3, MXRA8, ERVW-1, ADAM8, LLGL2, PDGFB, PDGFA, PPL, CYP27B1, TERT, NLRP3, NPTX1, CCDC141, KIAA0319, JAG2, ST14, EGR2, ACE, NBEAL2, FA2H, GJB2, ARTN, IL7, CYP1A1, SNAI1, CSPG5, NOX5, MKX, ITGB4, TNFAIP2, STON2, PPP1R9A, ADRA1B, SMPD3, SHH, COBL…
GO:0030195~negative regulation of blood coagulation	4	1.18694	0.0297005	THBD, PDGFB, PDGFA, PLAT
GO:0051055~negative regulation of lipid biosynthetic process	4	1.18694	0.0297005	CYP27B1, PDGFB, SNAI1, PDGFA
GO:1900047~negative regulation of hemostasis	4	1.18694	0.0297005	THBD, PDGFB, PDGFA, PLAT
GO:0009611~response to wounding	17	5.04451	0.0297882	DMTN, ITGB4, MPL, PDGFB, PDGFA, WNT7A, PLAT, ENO3, THBD, SHH, TEC, ERBB3, SYT11, CYP1A1, TFF2, TFF1, ENPP4
GO:0006643~membrane lipid metabolic process	8	2.37389	0.0309441	SMPD3, FA2H, ST6GALNAC1, CYP1B1, ARSG, A4GALT, SMPDL3B, SGPP2
GO:0048008~platelet-derived growth factor receptor signaling pathway	4	1.18694	0.0313919	PDGFB, PDGFA, PLAT, PDGFRL
GO:0043297~apical junction assembly	4	1.18694	0.0313919	OCLN, CLDN3, PARD6A, CLDN1
GO:0030335~positive regulation of cell migration	12	3.56083	0.0316711	CCL24, GRB7, DMTN, SEMA3C, TERT, CEACAM6, PDGFB, SNAI1, PDGFA, WNT7A, ADAM8, WASH1
GO:1903708~positive regulation of hemopoiesis	7	2.07715	0.0331145	IL15RA, SHH, IL7, IHH, NLRP3, ADAM8, FOS
GO:0030154~cell differentiation	67	19.8813	0.033124	ITGB4, TNFAIP2, IHH, STON2, PPP1R9A, TGM1, SMPD3, RNF112, SHH, VSIG1, MNX1, EPHB3, IL15RA, OMG, COBL, FOS, WNT9A, PAX5, KRT75, NPNT, CLDN3, CEACAM5, IFNE, MXRA8, ADAM8, TFF1, CDH15, LLGL2, RBM47, SEMA3C, PDGFB, PPL, CYP27B1, ERBB3, TERT, EPCAM, HSF4, NLRP3, FLNB, TNNI3, NPTX1, KIAA0319, P4HTM, JAG2, EGR2, ST14, ACE, MYEF2, DMTN, SORT1, AKR1C1, WNT7A, AKR1C2, NBEAL2, GRHL1, LILRB3, FA2H, TEC, DHRS…
GO:0003382~epithelial cell morphogenesis	4	1.18694	0.0331328	ST14, CLDN3, VSIG1, FLNB
GO:0048731~system development	77	22.8487	0.033218	AMHR2, ITGB4, NPY2R, TNFAIP2, IHH, STON2, PPP1R9A, ENO3, CLDN1, RAPGEFL1, TGM1, SMPD3, RNF112, SHH, SALL4, CYP1B1, MNX1, EPHB3, IL15RA, USP2, OMG, COBL, FOS, WNT9A, PAX5, KRT75, NPNT, BCAN, IFNE, MXRA8, ADAM8, CRELD1, ITGB1BP2, SHANK2, LLGL2, RBM47, SEMA3C, PDGFB, PDGFA, ATP2C2, PPL, SLC25A27, CYP27B1, PARD6A, ERBB3, TERT, EPCAM, HSF4, NLRP3, FLNB, TNNI3, NPTX1, CCDC141, KIAA0319, P4HTM, JAG2, CC…
GO:0060078~regulation of postsynaptic membrane potential	5	1.48368	0.033613	NPY2R, SCN9A, WNT7A, SCN4A, PPP1R9A
GO:0045833~negative regulation of lipid metabolic process	5	1.48368	0.033613	CYP27B1, PDGFB, SNAI1, PDGFA, WASH1
GO:0050865~regulation of cell activation	14	4.1543	0.03371	IL15RA, DMTN, MPL, PDGFB, IHH, PDGFA, CCDC88B, THBD, SHH, TEC, IL7, MZB1, NLRP3, ADAM8
GO:0040012~regulation of locomotion	19	5.63798	0.033913	JAG2, CCL24, GRB7, ACE, DMTN, SEMA3C, PDGFB, PDGFA, WNT7A, SHH, TERT, ERBB3, CEACAM6, EPCAM, ARTN, SNAI1, CYP1B1, ADAM8, WASH1
GO:1902895~positive regulation of pri-miRNA transcription from RNA polymerase II promoter	3	0.890208	0.0341464	TERT, PDGFB, FOS
GO:0042359~vitamin D metabolic process	3	0.890208	0.0341464	CYP27B1, CYP1A1, SNAI1
GO:0072111~cell proliferation involved in kidney development	3	0.890208	0.0341464	SHH, PDGFB, PDGFA
GO:0060445~branching involved in salivary gland morphogenesis	3	0.890208	0.0341464	SHH, SEMA3C, PDGFA
GO:0023052~signaling	107	31.7507	0.034315	CYFIP2, RAB3B, AMHR2, NPY2R, PLEKHB1, MPL, IHH, PLAT, RAPGEFL1, SALL4, SCN9A, CYP1B1, EPHB3, GUCY1A3, IL15RA, EPHA6, GPR78, NPNT, PDGFRL, GRIP2, CLDN3, GPR160, ADAM8, LLGL2, GRB7, EPHA10, PDGFB, LYPD1, PDGFA, MST1R, CYP27B1, TERT, RHPN1, NLRP3, NPTX1, TSPAN1, JAG2, EGR2, RAB39B, PILRB, GJB2, ARTN, IL7, WNK2, SNAI1, CSPG5, ITGB4, PPP1R9A, ADRA1B, SMPD3, THBD, SHH, RPS6KL1, OR13G1, PLEKHG6, TRAF1, …
GO:0006939~smooth muscle contraction	5	1.48368	0.0349024	GUCY1A3, NPY2R, ADRA1B, NPNT, GRIP2
GO:0044767~single-organism developmental process	95	28.1899	0.0355024	AMHR2, ITGB4, NPY2R, PLEKHB1, TNFAIP2, IHH, STON2, ADRA1B, PPP1R9A, ENO3, CLDN1, RAPGEFL1, TGM1, SMPD3, RNF112, SHH, VSIG1, SALL4, SCN9A, CYP1B1, MNX1, EPHB3, IL15RA, USP2, OMG, COBL, FOS, WNT9A, PAX5, KRT75, NPNT, BCAN, DOPEY2, CLDN3, CEACAM5, IFNE, MXRA8, ERVW-1, TNFRSF25, ADAM8, CRELD1, ITGB1BP2, CDH15, SHANK2, LLGL2, RBM47, DNAH1, SEMA3C, PDGFB, PDGFA, ATP2C2, PPL, KRT83, SLC25A27, CYP27B1, P…
GO:0060021~palate development	5	1.48368	0.0362203	JAG2, SHH, SNAI1, WNT7A, EPHB3
GO:0050819~negative regulation of coagulation	4	1.18694	0.0367624	THBD, PDGFB, PDGFA, PLAT
GO:0032101~regulation of response to external stimulus	18	5.34125	0.0367693	CCL24, DMTN, SEMA3C, PDGFB, PDGFA, PLAT, MAPK13, THBD, CYP27B1, TEC, SYT11, ARTN, NLRP3, ADAM8, ENPP4, PIK3AP1, SMPDL3B, BIRC3
GO:0007166~cell surface receptor signaling pathway	51	15.1335	0.036944	CYFIP2, AMHR2, ITGB4, NPY2R, MPL, IHH, PLAT, PPP1R9A, SHH, EPHB3, IL15RA, EPHA6, TRAF1, FOS, WNT9A, NPNT, LIME1, PDGFRL, GRIP2, LAT2, CNKSR1, IFNE, TFF2, TNFRSF25, ADAM8, BIRC3, GRB7, SEMA3C, EPHA10, PDGFB, PDGFA, MST1R, TSPAN33, PARD6A, ERBB3, TERT, TSPAN1, JAG2, CCL24, DMTN, SORT1, WNT7A, PILRB, LILRB3, MAPK13, MAPK10, TEC, IL7, CD7, SNAI1, NOTUM
GO:0006895~Golgi to endosome transport	3	0.890208	0.037383	DOPEY2, SORT1, CORO7
GO:0098602~single organism cell adhesion	19	5.63798	0.0380943	JAG2, CYFIP2, DMTN, MPL, IHH, NPNT, PLEKHA7, CCDC88B, SHH, HSH2D, EPCAM, IL7, IFNE, CEACAM5, CD7, CYP1B1, NLRP3, ADAM8, EPHB3
GO:0034121~regulation of toll-like receptor signaling pathway	4	1.18694	0.0386506	SARM1, PIK3AP1, SMPDL3B, BIRC3
GO:0016337~single organismal cell-cell adhesion	18	5.34125	0.0387465	JAG2, CYFIP2, DMTN, MPL, IHH, NPNT, PLEKHA7, CCDC88B, SHH, HSH2D, EPCAM, IL7, IFNE, CEACAM5, CD7, CYP1B1, NLRP3, ADAM8
GO:0048736~appendage development	7	2.07715	0.0393674	SHH, SEMA3C, ITGB4, SALL4, IHH, WNT7A, WNT9A
GO:0060173~limb development	7	2.07715	0.0393674	SHH, SEMA3C, ITGB4, SALL4, IHH, WNT7A, WNT9A
GO:0007167~enzyme linked receptor protein signaling pathway	22	6.52819	0.0411711	CYFIP2, GRB7, EPHA6, AMHR2, EPHA10, SORT1, PDGFB, PDGFA, PILRB, PLAT, MST1R, FOS, NPNT, PDGFRL, MAPK13, CNKSR1, SHH, PARD6A, TEC, ERBB3, CD7, EPHB3
GO:0001523~retinoid metabolic process	5	1.48368	0.041776	SDR16C5, DHRS9, AKR1C1, CYP1A1, CYP1B1
GO:0014910~regulation of smooth muscle cell migration	4	1.18694	0.0425722	ACE, TERT, PDGFB, PDGFA
GO:0006546~glycine catabolic process	2	0.593472	0.0433113	GLDC, AMT
GO:0019464~glycine decarboxylation via glycine cleavage system	2	0.593472	0.0433113	GLDC, AMT
GO:0016554~cytidine to uridine editing	2	0.593472	0.0433113	RBM47, A1CF
GO:2000591~positive regulation of metanephric mesenchymal cell migration	2	0.593472	0.0433113	PDGFB, PDGFA
GO:0035793~positive regulation of metanephric mesenchymal cell migration by platelet-derived growth factor receptor-beta signaling pathway	2	0.593472	0.0433113	PDGFB, PDGFA
GO:0071072~negative regulation of phospholipid biosynthetic process	2	0.593472	0.0433113	PDGFB, PDGFA
GO:1900238~regulation of metanephric mesenchymal cell migration by platelet-derived growth factor receptor-beta signaling pathway	2	0.593472	0.0433113	PDGFB, PDGFA
GO:2000145~regulation of cell motility	18	5.34125	0.0435213	JAG2, CCL24, GRB7, ACE, DMTN, SEMA3C, PDGFB, PDGFA, WNT7A, SHH, TERT, ERBB3, CEACAM6, EPCAM, SNAI1, CYP1B1, ADAM8, WASH1
GO:0042634~regulation of hair cycle	3	0.890208	0.0441895	FA2H, TERT, TRPV3
GO:0010669~epithelial structure maintenance	3	0.890208	0.0441895	MUC2, VSIG1, TFF1
GO:0097164~ammonium ion metabolic process	5	1.48368	0.0447246	SMPD3, PLA2G16, JMJD7-PLA2G4B, LCAT, SMPDL3B
GO:0007275~multicellular organism development	85	25.2226	0.0456183	AMHR2, ITGB4, NPY2R, PLEKHB1, TNFAIP2, IHH, STON2, ADRA1B, PPP1R9A, ENO3, CLDN1, RAPGEFL1, TGM1, SMPD3, RNF112, SHH, SALL4, SCN9A, CYP1B1, MNX1, EPHB3, IL15RA, USP2, OMG, COBL, FOS, WNT9A, PAX5, KRT75, NPNT, BCAN, DOPEY2, IFNE, MXRA8, TNFRSF25, ADAM8, CRELD1, ITGB1BP2, SHANK2, LLGL2, RBM47, SEMA3C, PDGFB, PDGFA, ATP2C2, PPL, SLC25A27, CYP27B1, PARD6A, ERBB3, TERT, EPCAM, HSF4, NLRP3, FLNB, TNNI3,…
GO:0035725~sodium ion transmembrane transport	6	1.78042	0.0461342	SLC34A3, SLC13A4, WNK2, SCN9A, SLC4A11, SCN4A
GO:0051240~positive regulation of multicellular organismal process	30	8.90208	0.0462989	NPY2R, IHH, PDGFB, PDGFA, ADRA1B, PPP1R9A, THBD, RNF112, CYP27B1, SHH, ERBB3, TERT, CYP1B1, NLRP3, ENPP4, EPHB3, IL15RA, CCL24, DMTN, USP2, COBL, WNT7A, FOS, NPNT, MAPK13, CCDC88B, IL7, SNAI1, ADAM8, BIRC3
GO:0031954~positive regulation of protein autophosphorylation	3	0.890208	0.0477515	ACE, PDGFB, PDGFA
GO:0035902~response to immobilization stress	3	0.890208	0.0477515	CYP1A1, TFF1, FOS
GO:0044700~single organism signaling	105	31.1573	0.0481023	CYFIP2, RAB3B, AMHR2, NPY2R, PLEKHB1, MPL, IHH, PLAT, RAPGEFL1, SALL4, SCN9A, CYP1B1, EPHB3, GUCY1A3, IL15RA, EPHA6, GPR78, NPNT, PDGFRL, GRIP2, CLDN3, GPR160, ADAM8, LLGL2, GRB7, EPHA10, PDGFB, LYPD1, PDGFA, MST1R, CYP27B1, TERT, RHPN1, NLRP3, NPTX1, TSPAN1, JAG2, EGR2, RAB39B, PILRB, GJB2, ARTN, IL7, WNK2, SNAI1, ITGB4, PPP1R9A, ADRA1B, SMPD3, THBD, SHH, RPS6KL1, OR13G1, PLEKHG6, TRAF1, FOS, WN…

## Sheet: GO_DOWN_KDM1Ai
GO_DOWN_KDM1Ai <-0.58 log2FC	Count	%	PValue	Genes
GO:0009605~response to external stimulus	28	23.1405	5.27275e-07	CXCL6, IFITM1, RNASEL, CXCL8, TNFAIP6, TXK, TNFAIP3, CXCL1, IFI44L, HERC5, RABGEF1, PCSK1N, TBXA2R, PDE4B, SLIT3, FADD, GBP1, RPL39, BATF2, IL33, EPHA7, ENDOG, FOXD1, AUTS2, TNFRSF18, PSMA6, LHX2, MYOD1
GO:0006952~defense response	22	18.1818	5.73862e-06	CXCL6, BATF2, IL33, IFITM1, RNASEL, CXCL8, TNFAIP6, TNFRSF18, MMP2, TXK, TNFAIP3, CXCL1, MAPK8IP2, IFI44L, HERC5, RABGEF1, PSMA6, BMP2, TBXA2R, FADD, GBP1, RPL39
GO:0051707~response to other organism	16	13.2231	7.30333e-06	CXCL6, BATF2, IL33, IFITM1, RNASEL, CXCL8, TNFRSF18, TNFAIP3, CXCL1, IFI44L, HERC5, TBXA2R, PDE4B, FADD, GBP1, RPL39
GO:0043207~response to external biotic stimulus	16	13.2231	7.30333e-06	CXCL6, BATF2, IL33, IFITM1, RNASEL, CXCL8, TNFRSF18, TNFAIP3, CXCL1, IFI44L, HERC5, TBXA2R, PDE4B, FADD, GBP1, RPL39
GO:0019221~cytokine-mediated signaling pathway	13	10.7438	1.15062e-05	CXCL6, IFITM1, RNASEL, CXCL8, TNFRSF18, TXK, TNFAIP3, CXCL1, RABGEF1, PSMA6, SLIT3, FADD, GBP1
GO:0009607~response to biotic stimulus	16	13.2231	1.3533e-05	CXCL6, BATF2, IL33, IFITM1, RNASEL, CXCL8, TNFRSF18, TNFAIP3, CXCL1, IFI44L, HERC5, TBXA2R, PDE4B, FADD, GBP1, RPL39
GO:0071310~cellular response to organic substance	26	21.4876	1.69714e-05	CXCL6, IFITM1, RNASEL, CXCL8, TXK, TNFAIP3, ITPR2, CXCL1, CTGF, RABGEF1, GNG2, TBXA2R, PDE4B, SLIT3, FADD, GBP1, ENDOG, FOXD1, TNFRSF18, MMP2, NR2F1, SULF1, PSMA6, BMP2, LIN28B, MYOD1
GO:0048584~positive regulation of response to stimulus	24	19.8347	4.84713e-05	CXCL6, IL33, RNASEL, ENDOG, CXCL8, FOXD1, TNFRSF18, MMP2, TXK, TNFAIP3, CXCL1, SULF1, MAPK8IP2, CTGF, PSMA6, BMP2, ARL2BP, TBXA2R, HLX, MYOD1, PDE4B, FADD, GBP1, DACT1
GO:0034097~response to cytokine	14	11.5702	9.91066e-05	CXCL6, IFITM1, RNASEL, ENDOG, CXCL8, TNFRSF18, TXK, TNFAIP3, CXCL1, RABGEF1, PSMA6, SLIT3, FADD, GBP1
GO:0002685~regulation of leukocyte migration	7	5.78512	9.95512e-05	IL33, CXCL6, RABGEF1, CXCL8, TNFRSF18, CXCL1, FADD
GO:0051607~defense response to virus	8	6.61157	0.000109225	HERC5, IL33, IFITM1, RNASEL, TNFAIP3, FADD, GBP1, IFI44L
GO:0098542~defense response to other organism	11	9.09091	0.000115312	HERC5, IL33, CXCL6, BATF2, IFITM1, RNASEL, TNFAIP3, FADD, GBP1, RPL39, IFI44L
GO:0071345~cellular response to cytokine stimulus	13	10.7438	0.000121333	CXCL6, IFITM1, RNASEL, CXCL8, TNFRSF18, TXK, TNFAIP3, CXCL1, RABGEF1, PSMA6, SLIT3, FADD, GBP1
GO:0070887~cellular response to chemical stimulus	27	22.314	0.000152633	CXCL6, IFITM1, RNASEL, CXCL8, SRXN1, TXK, TNFAIP3, ITPR2, CXCL1, CTGF, RABGEF1, GNG2, TBXA2R, PDE4B, SLIT3, FADD, GBP1, ENDOG, FOXD1, TNFRSF18, MMP2, NR2F1, SULF1, PSMA6, BMP2, LIN28B, MYOD1
GO:0048583~regulation of response to stimulus	33	27.2727	0.000154477	CXCL6, IFITM1, RNASEL, CXCL8, TNFAIP6, TXK, TNFAIP3, CXCL1, CTGF, RGS4, HERC5, RABGEF1, TBXA2R, HLX, PDE4B, DACT3, SLIT3, FADD, GBP1, DACT1, IL33, EPHA7, ENDOG, FOXD1, TNFRSF18, MMP2, SULF1, MAPK8IP2, PSMA6, BMP2, CLEC2B, ARL2BP, MYOD1
GO:0007166~cell surface receptor signaling pathway	27	22.314	0.000174023	CXCL6, IFITM1, RNASEL, CXCL8, GPR87, TXK, NOTCH2NL, TNFAIP3, CXCL1, CTGF, RABGEF1, GNG2, PDE4B, DACT3, SLIT3, FADD, GBP1, DACT1, IL33, EPHA7, FOXD1, TNFRSF18, MMP2, SULF1, MAPK8IP2, PSMA6, BMP2
GO:0006955~immune response	19	15.7025	0.000296871	CXCL6, IL33, IFITM1, RNASEL, CXCL8, TNFRSF18, MMP2, TXK, TNFAIP3, CXCL1, HERC5, RABGEF1, PSMA6, HLX, FTH1, PDE4B, FADD, GBP1, RPL39
GO:0030334~regulation of cell migration	12	9.91736	0.000387819	IL33, CXCL6, RABGEF1, IFITM1, BMP2, CXCL8, TNFAIP6, TNFRSF18, UTS2, CXCL1, FADD, SULF1
GO:0051270~regulation of cellular component movement	13	10.7438	0.000392542	CXCL6, IL33, IFITM1, CXCL8, TNFAIP6, TNFRSF18, CXCL1, SULF1, RABGEF1, BMP2, PDE4B, UTS2, FADD
GO:0022603~regulation of anatomical structure morphogenesis	15	12.3967	0.000403657	EPHA7, CXCL8, PALM2, TNFAIP3, SULF1, PSMA6, BMP2, TBXA2R, MYOD1, DACT3, UTS2, SLIT3, MNS1, GBP1, DACT1
GO:0051239~regulation of multicellular organismal process	26	21.4876	0.000426592	IFITM1, CXCL8, TXK, TNFAIP3, ITPR2, CACNA1G, CTGF, HERC5, RABGEF1, TBXA2R, HLX, PDE4B, DACT3, SLIT3, FADD, GBP1, DACT1, IL33, EPHA7, FOXD1, NR2F1, SULF1, PSMA6, BMP2, MYOD1, UTS2
GO:0010033~response to organic substance	27	22.314	0.000430394	CXCL6, IFITM1, RNASEL, CXCL8, TXK, TNFAIP3, ITPR2, CXCL1, CTGF, RABGEF1, GNG2, TBXA2R, PDE4B, SLIT3, FADD, GBP1, ENDOG, FOXD1, TNFRSF18, MMP2, NR2F1, SULF1, PSMA6, BMP2, LIN28B, MYOD1, UTS2
GO:0002684~positive regulation of immune system process	14	11.5702	0.000570828	CXCL6, IL33, CXCL8, TNFRSF18, MMP2, TXK, TNFAIP3, CXCL1, RABGEF1, PSMA6, HLX, PDE4B, FADD, GBP1
GO:0032101~regulation of response to external stimulus	12	9.91736	0.000595866	HERC5, IL33, CXCL6, PSMA6, RABGEF1, CXCL8, TNFAIP6, TBXA2R, MYOD1, TXK, TNFAIP3, CXCL1
GO:0002682~regulation of immune system process	17	14.0496	0.000682128	CXCL6, IL33, IFITM1, CXCL8, TNFRSF18, MMP2, TXK, TNFAIP3, CXCL1, HERC5, RABGEF1, PSMA6, CLEC2B, HLX, PDE4B, FADD, GBP1
GO:0009615~response to virus	8	6.61157	0.000698606	HERC5, IL33, IFITM1, RNASEL, TNFAIP3, FADD, GBP1, IFI44L
GO:2000145~regulation of cell motility	12	9.91736	0.000706674	IL33, CXCL6, RABGEF1, IFITM1, BMP2, CXCL8, TNFAIP6, TNFRSF18, UTS2, CXCL1, FADD, SULF1
GO:0033993~response to lipid	13	10.7438	0.000730702	CXCL6, ENDOG, CXCL8, TNFRSF18, NR2F1, TNFAIP3, CXCL1, CTGF, TBXA2R, MYOD1, PDE4B, UTS2, SLIT3
GO:0040011~locomotion	18	14.876	0.000744097	CXCL6, IL33, IFITM1, EPHA7, CXCL8, FOXD1, TNFAIP6, TNFRSF18, CXCL1, SULF1, CTGF, RABGEF1, BMP2, LHX2, PDE4B, UTS2, SLIT3, FADD
GO:0042127~regulation of cell proliferation	18	14.876	0.000873841	CXCL6, IFITM1, CXCL8, TNFRSF18, MMP2, TXK, CLEC11A, TNFAIP3, CXCL1, SULF1, CTGF, BMP2, HLX, MYOD1, FTH1, UTS2, SLIT3, FADD
GO:0080134~regulation of response to stress	16	13.2231	0.000975065	IL33, ENDOG, TNFAIP6, MMP2, TXK, TNFAIP3, MAPK8IP2, CTGF, HERC5, RABGEF1, PSMA6, BMP2, TBXA2R, MYOD1, FADD, DACT1
GO:0040012~regulation of locomotion	12	9.91736	0.00100138	IL33, CXCL6, RABGEF1, IFITM1, BMP2, CXCL8, TNFAIP6, TNFRSF18, UTS2, CXCL1, FADD, SULF1
GO:0006950~response to stress	31	25.6198	0.00107169	CXCL6, IFITM1, RNASEL, CXCL8, SRXN1, TNFAIP6, TXK, TNFAIP3, ITPR2, CXCL1, IFI44L, CTGF, HERC5, RABGEF1, PCSK1N, GNG2, TBXA2R, FADD, GBP1, RPL39, DACT1, BATF2, IL33, ENDOG, TNFRSF18, MMP2, MAPK8IP2, PSMA6, BMP2, MYOD1, UTS2
GO:0051704~multi-organism process	23	19.0083	0.00107379	CXCL6, BATF2, IL33, IFITM1, RNASEL, RPL41, CXCL8, TNFAIP6, TNFRSF18, MMP2, TNFAIP3, RPL23A, CXCL1, MAPK8IP2, IFI44L, HERC5, TBXA2R, PDE4B, MNS1, FADD, GBP1, RPL39, RPL17
GO:0016477~cell migration	15	12.3967	0.00130096	CXCL6, IL33, IFITM1, CXCL8, TNFAIP6, TNFRSF18, CXCL1, SULF1, CTGF, RABGEF1, BMP2, PDE4B, UTS2, SLIT3, FADD
GO:0048519~negative regulation of biological process	36	29.7521	0.00131124	IFITM1, RNASEL, CXCL8, TNFAIP6, GPR87, TNFAIP3, ITPR2, CXCL1, CTGF, RGS4, HERC5, RABGEF1, PCSK1N, HLX, CCDC85B, CAMK2N2, FTH1, PDE4B, DACT3, SLIT3, FADD, GBP1, DACT1, IL33, EPHA7, FOXD1, TNFRSF18, ARID5A, NR2F1, SULF1, PSMA6, BMP2, LIN28B, MYOD1, UTS2, TGFBI
GO:0006928~movement of cell or subcellular component	19	15.7025	0.00166448	CXCL6, IL33, IFITM1, EPHA7, CXCL8, FOXD1, TNFAIP6, TNFRSF18, CXCL1, SULF1, CACNA1G, CTGF, RABGEF1, BMP2, LHX2, PDE4B, UTS2, SLIT3, FADD
GO:0002687~positive regulation of leukocyte migration	5	4.13223	0.00181907	CXCL6, CXCL8, TNFRSF18, CXCL1, FADD
GO:0016032~viral process	13	10.7438	0.00197983	IL33, IFITM1, RNASEL, RPL41, CXCL8, TNFAIP3, RPL23A, IFI44L, HERC5, FADD, GBP1, RPL39, RPL17
GO:0050900~leukocyte migration	8	6.61157	0.00208621	IL33, CXCL6, RABGEF1, CXCL8, TNFRSF18, PDE4B, CXCL1, FADD
GO:0044764~multi-organism cellular process	13	10.7438	0.00210282	IL33, IFITM1, RNASEL, RPL41, CXCL8, TNFAIP3, RPL23A, IFI44L, HERC5, FADD, GBP1, RPL39, RPL17
GO:0009653~anatomical structure morphogenesis	24	19.8347	0.00214228	EPHA7, CXCL8, FOXD1, MMP2, PALM2, TNFAIP3, SOBP, SULF1, MAPK8IP2, CTGF, PSMA6, BMP2, MMP13, TBXA2R, HLX, LHX2, MYOD1, DACT3, UTS2, SLIT3, MNS1, TGFBI, GBP1, DACT1
GO:0034655~nucleobase-containing compound catabolic process	8	6.61157	0.00221416	LIN28B, RPL41, ENDOG, PRPF18, PDE4B, RPL23A, RPL39, RPL17
GO:0008283~cell proliferation	19	15.7025	0.00249036	IL33, IFITM1, CXCL8, MMP2, CLEC11A, TNFAIP3, RPL23A, CXCL1, SULF1, CTGF, BMP2, GNG2, HLX, MYOD1, FTH1, UTS2, SLIT3, FADD, TGFBI
GO:0044707~single-multicellular organism process	42	34.7107	0.00255908	IFITM1, CXCL8, HLF, TXK, NOTCH2NL, TNFAIP3, ITPR2, CXCL1, SOBP, CACNA1G, CTGF, HERC5, RABGEF1, PCSK1N, GNG2, TBXA2R, HLX, PDE4B, DACT3, SLIT3, FADD, GBP1, DACT1, BATF2, IL33, EPHA7, ENDOG, FOXD1, TNFRSF18, MMP2, NR2F1, SULF1, MAPK8IP2, PSMA6, BMP2, MMP13, LHX2, MYOD1, MALL, UTS2, TGFBI, MNS1
GO:0044419~interspecies interaction between organisms	13	10.7438	0.00259464	IL33, IFITM1, RNASEL, RPL41, CXCL8, TNFAIP3, RPL23A, IFI44L, HERC5, FADD, GBP1, RPL39, RPL17
GO:0044403~symbiosis, encompassing mutualism through parasitism	13	10.7438	0.00259464	IL33, IFITM1, RNASEL, RPL41, CXCL8, TNFAIP3, RPL23A, IFI44L, HERC5, FADD, GBP1, RPL39, RPL17
GO:0002252~immune effector process	11	9.09091	0.00268586	HERC5, IL33, CXCL6, RABGEF1, IFITM1, RNASEL, HLX, TNFAIP3, FADD, GBP1, IFI44L
GO:0030335~positive regulation of cell migration	8	6.61157	0.00274894	CXCL6, BMP2, CXCL8, TNFAIP6, TNFRSF18, UTS2, CXCL1, FADD
GO:0051241~negative regulation of multicellular organismal process	13	10.7438	0.00302841	IL33, EPHA7, NR2F1, TNFAIP3, SULF1, HERC5, RABGEF1, BMP2, HLX, PDE4B, DACT3, UTS2, GBP1
GO:0003012~muscle system process	8	6.61157	0.00315728	TBXA2R, MYOD1, PDE4B, MYL10, UTS2, SULF1, CACNA1G, CTGF
GO:0032496~response to lipopolysaccharide	7	5.78512	0.00317517	CXCL6, CXCL8, TBXA2R, TNFRSF18, PDE4B, TNFAIP3, CXCL1
GO:0006954~inflammatory response	10	8.26446	0.00323329	IL33, CXCL6, RABGEF1, BMP2, CXCL8, TNFAIP6, TBXA2R, TNFRSF18, TNFAIP3, CXCL1
GO:0042221~response to chemical	32	26.4463	0.00328292	CXCL6, IFITM1, RNASEL, CXCL8, SRXN1, TXK, TNFAIP3, ITPR2, CXCL1, CACNA1G, CTGF, RABGEF1, GNG2, TBXA2R, PDE4B, SLIT3, FADD, GBP1, EPHA7, ENDOG, FOXD1, TNFRSF18, MMP2, NR2F1, CYBRD1, SULF1, PSMA6, BMP2, LIN28B, LHX2, MYOD1, UTS2
GO:0048523~negative regulation of cellular process	33	27.2727	0.00328707	IFITM1, RNASEL, CXCL8, GPR87, TNFAIP3, ITPR2, CXCL1, CTGF, RGS4, RABGEF1, PCSK1N, HLX, CCDC85B, CAMK2N2, FTH1, DACT3, SLIT3, FADD, GBP1, DACT1, IL33, EPHA7, FOXD1, TNFRSF18, ARID5A, NR2F1, SULF1, PSMA6, BMP2, LIN28B, MYOD1, UTS2, TGFBI
GO:2000147~positive regulation of cell motility	8	6.61157	0.00333305	CXCL6, BMP2, CXCL8, TNFAIP6, TNFRSF18, UTS2, CXCL1, FADD
GO:0046700~heterocycle catabolic process	8	6.61157	0.0034237	LIN28B, RPL41, ENDOG, PRPF18, PDE4B, RPL23A, RPL39, RPL17
GO:0001525~angiogenesis	8	6.61157	0.00351623	CXCL8, TBXA2R, MMP2, TNFAIP3, UTS2, TGFBI, SULF1, CTGF
GO:1901700~response to oxygen-containing compound	16	13.2231	0.00356143	CXCL6, RNASEL, ENDOG, CXCL8, TNFRSF18, MMP2, TNFAIP3, ITPR2, CXCL1, CTGF, GNG2, TBXA2R, MYOD1, PDE4B, UTS2, SLIT3
GO:0014070~response to organic cyclic compound	12	9.91736	0.00367072	LIN28B, BMP2, ENDOG, GNG2, TBXA2R, MYOD1, NR2F1, PDE4B, ITPR2, UTS2, SLIT3, CTGF
GO:0044270~cellular nitrogen compound catabolic process	8	6.61157	0.00375591	LIN28B, RPL41, ENDOG, PRPF18, PDE4B, RPL23A, RPL39, RPL17
GO:0048870~cell motility	15	12.3967	0.00382037	CXCL6, IL33, IFITM1, CXCL8, TNFAIP6, TNFRSF18, CXCL1, SULF1, CTGF, RABGEF1, BMP2, PDE4B, UTS2, SLIT3, FADD
GO:0051674~localization of cell	15	12.3967	0.00382037	CXCL6, IL33, IFITM1, CXCL8, TNFAIP6, TNFRSF18, CXCL1, SULF1, CTGF, RABGEF1, BMP2, PDE4B, UTS2, SLIT3, FADD
GO:0070482~response to oxygen levels	7	5.78512	0.00384272	BMP2, ENDOG, MMP2, MYOD1, ITPR2, UTS2, CTGF
GO:0051272~positive regulation of cellular component movement	8	6.61157	0.00385519	CXCL6, BMP2, CXCL8, TNFAIP6, TNFRSF18, UTS2, CXCL1, FADD
GO:0050896~response to stimulus	53	43.8017	0.00385674	CXCL6, IFITM1, CXCL8, SRXN1, TNFAIP6, TNFAIP3, CXCL1, IFI44L, CTGF, RGS4, HERC5, RABGEF1, FTH1, PDE4B, DACT3, ZNF385B, RPL39, DACT1, BATF2, EPHA7, ENDOG, FOXD1, TNFRSF18, MMP2, MAPK8IP2, PSMA6, MYOD1, UTS2, RNASEL, GPR87, TXK, NOTCH2NL, ITPR2, NTS, CACNA1G, PCSK1N, GNG2, TBXA2R, HLX, SLIT3, FADD, GBP1, IL33, AUTS2, NR2F1, CYBRD1, SULF1, BMP2, LIN28B, CLEC2B, ARL2BP, LHX2, TGFBI
GO:0050776~regulation of immune response	12	9.91736	0.00385879	IL33, PSMA6, RABGEF1, IFITM1, CLEC2B, HLX, MMP2, TXK, PDE4B, TNFAIP3, FADD, GBP1
GO:0048518~positive regulation of biological process	38	31.405	0.00389968	CXCL6, IFITM1, RNASEL, CXCL8, HLF, TNFAIP6, TXK, TNFAIP3, CXCL1, CACNA1G, CTGF, RABGEF1, RANBP3L, TBXA2R, HLX, PDE4B, FADD, GBP1, DACT1, EIF5AL1, IL33, EPHA7, ENDOG, FOXD1, AUTS2, TNFRSF18, MMP2, CLEC11A, NR2F1, SULF1, MAPK8IP2, PSMA6, BMP2, ARL2BP, LHX2, MYOD1, UTS2, MNS1
GO:0040017~positive regulation of locomotion	8	6.61157	0.00395647	CXCL6, BMP2, CXCL8, TNFAIP6, TNFRSF18, UTS2, CXCL1, FADD
GO:0002237~response to molecule of bacterial origin	7	5.78512	0.0039634	CXCL6, CXCL8, TBXA2R, TNFRSF18, PDE4B, TNFAIP3, CXCL1
GO:0019439~aromatic compound catabolic process	8	6.61157	0.00400786	LIN28B, RPL41, ENDOG, PRPF18, PDE4B, RPL23A, RPL39, RPL17
GO:0050793~regulation of developmental process	20	16.5289	0.00459027	EPHA7, CXCL8, FOXD1, PALM2, NR2F1, TNFAIP3, SULF1, CTGF, PSMA6, BMP2, TBXA2R, HLX, MYOD1, DACT3, UTS2, SLIT3, MNS1, FADD, GBP1, DACT1
GO:0002376~immune system process	22	18.1818	0.00481004	CXCL6, BATF2, IL33, IFITM1, RNASEL, CXCL8, TNFRSF18, MMP2, TXK, TNFAIP3, CXCL1, IFI44L, HERC5, RABGEF1, PSMA6, CLEC2B, HLX, FTH1, PDE4B, FADD, GBP1, RPL39
GO:0001959~regulation of cytokine-mediated signaling pathway	5	4.13223	0.00483542	RABGEF1, TXK, TNFAIP3, SLIT3, FADD
GO:0048585~negative regulation of response to stimulus	15	12.3967	0.00493951	IL33, CXCL8, TNFAIP6, TNFAIP3, SULF1, RGS4, RABGEF1, PSMA6, BMP2, HLX, DACT3, SLIT3, FADD, GBP1, DACT1
GO:0006936~muscle contraction	7	5.78512	0.00496027	TBXA2R, PDE4B, MYL10, UTS2, SULF1, CACNA1G, CTGF
GO:0032879~regulation of localization	22	18.1818	0.00499695	CXCL6, IL33, IFITM1, RNASEL, CXCL8, TNFAIP6, TNFRSF18, ITPR2, CXCL1, SULF1, MAPK8IP2, CACNA1G, RABGEF1, RANBP3L, BMP2, ARL2BP, PDE4B, DACT3, UTS2, FADD, GBP1, DACT1
GO:1901361~organic cyclic compound catabolic process	8	6.61157	0.00527248	LIN28B, RPL41, ENDOG, PRPF18, PDE4B, RPL23A, RPL39, RPL17
GO:0061448~connective tissue development	6	4.95868	0.0053737	BMP2, MMP13, FOXD1, TGFBI, SULF1, CTGF
GO:0060759~regulation of response to cytokine stimulus	5	4.13223	0.00558827	RABGEF1, TXK, TNFAIP3, SLIT3, FADD
GO:0032774~RNA biosynthetic process	30	24.7934	0.00589837	RNASEL, ZNF570, HLF, TXK, TNFAIP3, CTGF, HLX, ZNF628, CCDC85B, FADD, ZFPL1, RPL39, RPL17, DACT1, BATF2, IL33, RPL41, FOXD1, AUTS2, ARID5A, NR2F1, RPL23A, SULF1, PSMA6, BMP2, LIN28B, ARL2BP, LHX2, ZNF837, MYOD1
GO:0001817~regulation of cytokine production	9	7.43802	0.0061225	HERC5, IL33, RABGEF1, TXK, PDE4B, TNFAIP3, FADD, SULF1, GBP1
GO:0060255~regulation of macromolecule metabolic process	40	33.0579	0.00629977	RNASEL, ZNF570, CXCL8, HLF, TXK, TNFAIP3, CTGF, RGS4, HERC5, RABGEF1, PCSK1N, HLX, ZNF628, CCDC85B, CAMK2N2, SLIT3, FADD, ZFPL1, GBP1, DACT1, EIF5AL1, BATF2, IL33, EPHA7, ENDOG, FOXD1, AUTS2, TNFRSF18, ARID5A, NR2F1, SULF1, MAPK8IP2, PSMA6, BMP2, LIN28B, ARL2BP, LHX2, ZNF837, MYOD1, UTS2
GO:0044265~cellular macromolecule catabolic process	12	9.91736	0.0063887	HERC5, IL33, PSMA6, LIN28B, RPL41, ENDOG, PRPF18, TNFAIP3, RPL23A, RPL39, RPL17, DACT1
GO:2000026~regulation of multicellular organismal development	17	14.0496	0.00657472	EPHA7, CXCL8, FOXD1, NR2F1, TNFAIP3, SULF1, CTGF, PSMA6, BMP2, TBXA2R, HLX, MYOD1, DACT3, UTS2, SLIT3, FADD, DACT1
GO:0006401~RNA catabolic process	6	4.95868	0.00671379	LIN28B, RPL41, PRPF18, RPL23A, RPL39, RPL17
GO:0070098~chemokine-mediated signaling pathway	4	3.30579	0.00703835	CXCL6, CXCL8, CXCL1, SLIT3
GO:0009887~organ morphogenesis	12	9.91736	0.00719106	PSMA6, BMP2, MMP13, FOXD1, HLX, MMP2, TNFAIP3, SLIT3, SOBP, SULF1, CTGF, DACT1
GO:0051240~positive regulation of multicellular organismal process	15	12.3967	0.00725799	IL33, IFITM1, CXCL8, FOXD1, TXK, TNFAIP3, SULF1, CTGF, BMP2, TBXA2R, HLX, MYOD1, PDE4B, UTS2, FADD
GO:0048646~anatomical structure formation involved in morphogenesis	13	10.7438	0.00805185	CXCL8, FOXD1, MMP2, TNFAIP3, SULF1, CTGF, BMP2, TBXA2R, LHX2, MYOD1, UTS2, MNS1, TGFBI
GO:0048514~blood vessel morphogenesis	8	6.61157	0.0088632	CXCL8, TBXA2R, MMP2, TNFAIP3, UTS2, TGFBI, SULF1, CTGF
GO:0010648~negative regulation of cell communication	13	10.7438	0.00984633	CXCL8, TNFAIP3, SULF1, RGS4, RABGEF1, PSMA6, BMP2, DACT3, UTS2, SLIT3, FADD, GBP1, DACT1
GO:0071495~cellular response to endogenous stimulus	13	10.7438	0.0100354	RNASEL, CXCL8, FOXD1, MMP2, NR2F1, ITPR2, SULF1, CTGF, BMP2, GNG2, MYOD1, PDE4B, SLIT3
GO:0023057~negative regulation of signaling	13	10.7438	0.010099	CXCL8, TNFAIP3, SULF1, RGS4, RABGEF1, PSMA6, BMP2, DACT3, UTS2, SLIT3, FADD, GBP1, DACT1
GO:0001816~cytokine production	9	7.43802	0.0102424	HERC5, IL33, RABGEF1, TXK, PDE4B, TNFAIP3, FADD, SULF1, GBP1
GO:0019222~regulation of metabolic process	41	33.8843	0.0103223	RNASEL, ZNF570, CXCL8, HLF, GPR87, TXK, TNFAIP3, CTGF, RGS4, HERC5, RABGEF1, PCSK1N, HLX, ZNF628, CCDC85B, CAMK2N2, SLIT3, FADD, ZFPL1, GBP1, DACT1, EIF5AL1, BATF2, IL33, EPHA7, ENDOG, FOXD1, AUTS2, TNFRSF18, ARID5A, NR2F1, SULF1, MAPK8IP2, PSMA6, BMP2, LIN28B, ARL2BP, LHX2, ZNF837, MYOD1, UTS2
GO:0006614~SRP-dependent cotranslational protein targeting to membrane	4	3.30579	0.0108293	RPL41, RPL23A, RPL39, RPL17
GO:0001775~cell activation	11	9.09091	0.0109784	IL33, BATF2, RABGEF1, CXCL8, GNG2, HLX, TXK, TNFAIP3, ITPR2, FADD, CTGF
GO:0080090~regulation of primary metabolic process	39	32.2314	0.0110709	RNASEL, ZNF570, CXCL8, HLF, GPR87, TXK, TNFAIP3, CTGF, RGS4, HERC5, RABGEF1, PCSK1N, HLX, ZNF628, CCDC85B, CAMK2N2, FADD, ZFPL1, GBP1, DACT1, EIF5AL1, BATF2, IL33, EPHA7, ENDOG, FOXD1, AUTS2, TNFRSF18, ARID5A, NR2F1, SULF1, MAPK8IP2, PSMA6, BMP2, LIN28B, ARL2BP, LHX2, ZNF837, MYOD1
GO:0050789~regulation of biological process	63	52.0661	0.0111332	CXCL6, IFITM1, ZNF570, CXCL8, TNFAIP6, TNFAIP3, CXCL1, CTGF, RGS4, HERC5, RABGEF1, FTH1, PDE4B, DACT3, ZNF385B, ZFPL1, DACT1, EIF5AL1, BATF2, EPHA7, ENDOG, FOXD1, DYNLT3, TNFRSF18, MMP2, CLEC11A, ARID5A, MAPK8IP2, PSMA6, ZNF837, MYOD1, UTS2, MNS1, RNASEL, HLF, GPR87, PALM2, TXK, NOTCH2NL, ITPR2, NTS, CACNA1G, RANBP3L, PCSK1N, GNG2, TBXA2R, ZNF628, HLX, CCDC85B, CAMK2N2, SLIT3, FADD, GBP1, IL33, A…
GO:0032649~regulation of interferon-gamma production	4	3.30579	0.0111371	IL33, TXK, PDE4B, FADD
GO:0051216~cartilage development	5	4.13223	0.0113515	BMP2, MMP13, TGFBI, SULF1, CTGF
GO:0016070~RNA metabolic process	33	27.2727	0.0113609	RNASEL, ZNF570, CXCL8, HLF, TXK, TNFAIP3, CTGF, HLX, ZNF628, CCDC85B, FADD, ZFPL1, RPL39, RPL17, DACT1, BATF2, IL33, RPL41, FOXD1, AUTS2, ARID5A, NR2F1, RPL23A, SULF1, PSMA6, BMP2, LIN28B, CTU1, PRPF18, ARL2BP, LHX2, ZNF837, MYOD1
GO:0007267~cell-cell signaling	15	12.3967	0.0118461	CXCL6, FOXD1, TNFAIP6, ITPR2, SULF1, MAPK8IP2, CACNA1G, CTGF, PSMA6, BMP2, GNG2, ARL2BP, DACT3, UTS2, DACT1
GO:0032501~multicellular organismal process	45	37.1901	0.0118673	IFITM1, CXCL8, HLF, TNFAIP6, TXK, NOTCH2NL, TNFAIP3, ITPR2, CXCL1, SOBP, NTS, CACNA1G, CTGF, HERC5, RABGEF1, PCSK1N, GNG2, TBXA2R, HLX, PDE4B, DACT3, MYL10, SLIT3, FADD, GBP1, DACT1, BATF2, IL33, EPHA7, ENDOG, FOXD1, TNFRSF18, MMP2, NR2F1, SULF1, MAPK8IP2, PSMA6, BMP2, MMP13, LHX2, MYOD1, MALL, UTS2, TGFBI, MNS1
GO:0050794~regulation of cellular process	61	50.4132	0.0120664	CXCL6, IFITM1, ZNF570, CXCL8, TNFAIP6, TNFAIP3, CXCL1, CTGF, RGS4, HERC5, RABGEF1, FTH1, PDE4B, DACT3, ZNF385B, ZFPL1, DACT1, EIF5AL1, BATF2, EPHA7, ENDOG, FOXD1, DYNLT3, TNFRSF18, MMP2, CLEC11A, ARID5A, MAPK8IP2, PSMA6, ZNF837, MYOD1, UTS2, MNS1, RNASEL, HLF, GPR87, PALM2, TXK, NOTCH2NL, ITPR2, NTS, CACNA1G, PCSK1N, GNG2, TBXA2R, ZNF628, HLX, CCDC85B, CAMK2N2, SLIT3, FADD, GBP1, IL33, AUTS2, NR2…
GO:0008285~negative regulation of cell proliferation	9	7.43802	0.0122016	IFITM1, BMP2, CXCL8, MYOD1, FTH1, TNFAIP3, CXCL1, SLIT3, SULF1
GO:0031323~regulation of cellular metabolic process	39	32.2314	0.0127079	RNASEL, ZNF570, CXCL8, HLF, GPR87, TXK, TNFAIP3, CTGF, RGS4, HERC5, RABGEF1, PCSK1N, HLX, ZNF628, CCDC85B, CAMK2N2, FADD, ZFPL1, GBP1, DACT1, EIF5AL1, BATF2, IL33, EPHA7, ENDOG, FOXD1, AUTS2, TNFRSF18, ARID5A, NR2F1, SULF1, MAPK8IP2, PSMA6, BMP2, LIN28B, ARL2BP, LHX2, ZNF837, MYOD1
GO:0032268~regulation of cellular protein metabolic process	20	16.5289	0.0127902	EIF5AL1, IL33, EPHA7, AUTS2, TNFRSF18, TNFAIP3, MAPK8IP2, CTGF, RGS4, HERC5, RABGEF1, PSMA6, LIN28B, BMP2, PCSK1N, ARL2BP, CAMK2N2, FADD, GBP1, DACT1
GO:0040007~growth	11	9.09091	0.0128283	BMP2, EPHA7, MMP13, HLX, LHX2, CCDC85B, MYOD1, TXK, DACT3, SLIT3, CTGF
GO:0006612~protein targeting to membrane	5	4.13223	0.0128824	RABGEF1, RPL41, RPL23A, RPL39, RPL17
GO:0006468~protein phosphorylation	17	14.0496	0.0129254	RNASEL, EPHA7, TNFRSF18, TXK, TNFAIP3, MAPK8IP2, CTGF, RGS4, HERC5, RABGEF1, PSMA6, BMP2, ARL2BP, MYOD1, CAMK2N2, GBP1, DACT1
GO:0032609~interferon-gamma production	4	3.30579	0.0130905	IL33, TXK, PDE4B, FADD
GO:0006613~cotranslational protein targeting to membrane	4	3.30579	0.0130905	RPL41, RPL23A, RPL39, RPL17
GO:0036293~response to decreased oxygen levels	6	4.95868	0.0133266	BMP2, ENDOG, MMP2, ITPR2, UTS2, CTGF
GO:0045047~protein targeting to ER	4	3.30579	0.0134338	RPL41, RPL23A, RPL39, RPL17
GO:0051224~negative regulation of protein transport	5	4.13223	0.013577	IL33, RABGEF1, DACT3, UTS2, GBP1
GO:0034470~ncRNA processing	7	5.78512	0.0136122	CTU1, LIN28B, RNASEL, RPL41, RPL23A, RPL39, RPL17
GO:0009968~negative regulation of signal transduction	12	9.91736	0.0138919	RGS4, PSMA6, RABGEF1, BMP2, CXCL8, DACT3, TNFAIP3, SLIT3, FADD, SULF1, GBP1, DACT1
GO:0050709~negative regulation of protein secretion	4	3.30579	0.0141359	IL33, RABGEF1, UTS2, GBP1
GO:1903522~regulation of blood circulation	6	4.95868	0.0142408	TBXA2R, PDE4B, ITPR2, UTS2, CACNA1G, CTGF
GO:0072599~establishment of protein localization to endoplasmic reticulum	4	3.30579	0.0148585	RPL41, RPL23A, RPL39, RPL17
GO:0009617~response to bacterium	8	6.61157	0.014939	CXCL6, CXCL8, TBXA2R, TNFRSF18, PDE4B, TNFAIP3, CXCL1, RPL39
GO:0034654~nucleobase-containing compound biosynthetic process	31	25.6198	0.0149881	RNASEL, ZNF570, HLF, GPR87, TXK, TNFAIP3, CTGF, HLX, ZNF628, CCDC85B, FADD, ZFPL1, RPL39, RPL17, DACT1, BATF2, IL33, RPL41, FOXD1, AUTS2, ARID5A, NR2F1, RPL23A, SULF1, PSMA6, BMP2, LIN28B, ARL2BP, LHX2, ZNF837, MYOD1
GO:0031347~regulation of defense response	9	7.43802	0.0150252	HERC5, IL33, PSMA6, RABGEF1, TNFAIP6, MMP2, TXK, TNFAIP3, FADD
GO:0048522~positive regulation of cellular process	33	27.2727	0.015407	CXCL6, IFITM1, RNASEL, CXCL8, HLF, TNFAIP6, TXK, TNFAIP3, CXCL1, CACNA1G, CTGF, HLX, FADD, DACT1, EIF5AL1, IL33, EPHA7, ENDOG, FOXD1, AUTS2, TNFRSF18, MMP2, CLEC11A, NR2F1, SULF1, MAPK8IP2, PSMA6, BMP2, ARL2BP, LHX2, MYOD1, UTS2, MNS1
GO:0032963~collagen metabolic process	4	3.30579	0.0156018	MMP13, MMP2, UTS2, CTGF
GO:0050778~positive regulation of immune response	9	7.43802	0.0160223	IL33, PSMA6, HLX, MMP2, TXK, PDE4B, TNFAIP3, FADD, GBP1
GO:0006935~chemotaxis	8	6.61157	0.0160648	CXCL6, EPHA7, CXCL8, FOXD1, LHX2, PDE4B, CXCL1, SLIT3
GO:0042330~taxis	8	6.61157	0.0162096	CXCL6, EPHA7, CXCL8, FOXD1, LHX2, PDE4B, CXCL1, SLIT3
GO:1904950~negative regulation of establishment of protein localization	5	4.13223	0.0163265	IL33, RABGEF1, DACT3, UTS2, GBP1
GO:0000956~nuclear-transcribed mRNA catabolic process	5	4.13223	0.0168613	RPL41, PRPF18, RPL23A, RPL39, RPL17
GO:0065007~biological regulation	65	53.719	0.0172929	CXCL6, IFITM1, ZNF570, CXCL8, TNFAIP6, TNFAIP3, CXCL1, CTGF, RGS4, HERC5, RABGEF1, FTH1, PDE4B, DACT3, ZNF385B, ZFPL1, DACT1, EIF5AL1, BATF2, EPHA7, ENDOG, FOXD1, DYNLT3, TNFRSF18, MMP2, CLEC11A, ARID5A, MAPK8IP2, PSMA6, ZNF837, MYOD1, MALL, UTS2, MNS1, RNASEL, HLF, GPR87, PALM2, TXK, NOTCH2NL, ITPR2, NTS, CACNA1G, RANBP3L, PCSK1N, GNG2, TBXA2R, ZNF628, HLX, CCDC85B, CAMK2N2, SLIT3, FADD, GBP1, I…
GO:0044259~multicellular organismal macromolecule metabolic process	4	3.30579	0.0175505	MMP13, MMP2, UTS2, CTGF
GO:0045087~innate immune response	10	8.26446	0.0176955	HERC5, PSMA6, IFITM1, RNASEL, MMP2, TXK, TNFAIP3, FADD, GBP1, RPL39
GO:0009888~tissue development	16	13.2231	0.0177363	EPHA7, FOXD1, HLF, MMP2, TXK, SULF1, CTGF, PSMA6, BMP2, MMP13, HLX, LHX2, MYOD1, DACT3, TGFBI, DACT1
GO:0018130~heterocycle biosynthetic process	31	25.6198	0.0177755	RNASEL, ZNF570, HLF, GPR87, TXK, TNFAIP3, CTGF, HLX, ZNF628, CCDC85B, FADD, ZFPL1, RPL39, RPL17, DACT1, BATF2, IL33, RPL41, FOXD1, AUTS2, ARID5A, NR2F1, RPL23A, SULF1, PSMA6, BMP2, LIN28B, ARL2BP, LHX2, ZNF837, MYOD1
GO:0002822~regulation of adaptive immune response based on somatic recombination of immune receptors built from immunoglobulin superfamily domains	4	3.30579	0.0183663	IL33, HLX, TNFAIP3, FADD
GO:0019438~aromatic compound biosynthetic process	31	25.6198	0.0185065	RNASEL, ZNF570, HLF, GPR87, TXK, TNFAIP3, CTGF, HLX, ZNF628, CCDC85B, FADD, ZFPL1, RPL39, RPL17, DACT1, BATF2, IL33, RPL41, FOXD1, AUTS2, ARID5A, NR2F1, RPL23A, SULF1, PSMA6, BMP2, LIN28B, ARL2BP, LHX2, ZNF837, MYOD1
GO:0002697~regulation of immune effector process	6	4.95868	0.0194482	HERC5, IL33, RABGEF1, HLX, TNFAIP3, FADD
GO:0001932~regulation of protein phosphorylation	13	10.7438	0.0196878	EPHA7, TNFRSF18, TNFAIP3, MAPK8IP2, CTGF, RGS4, HERC5, RABGEF1, BMP2, ARL2BP, CAMK2N2, GBP1, DACT1
GO:0001568~blood vessel development	8	6.61157	0.0198045	CXCL8, TBXA2R, MMP2, TNFAIP3, UTS2, TGFBI, SULF1, CTGF
GO:0035295~tube development	8	6.61157	0.0204826	BMP2, EPHA7, CXCL8, FOXD1, HLX, LHX2, CTGF, DACT1
GO:0000184~nuclear-transcribed mRNA catabolic process, nonsense-mediated decay	4	3.30579	0.0209391	RPL41, RPL23A, RPL39, RPL17
GO:0050777~negative regulation of immune response	4	3.30579	0.0209391	IL33, RABGEF1, HLX, TNFAIP3
GO:0006402~mRNA catabolic process	5	4.13223	0.0212231	RPL41, PRPF18, RPL23A, RPL39, RPL17
GO:0019058~viral life cycle	7	5.78512	0.0213563	IFITM1, RNASEL, RPL41, CXCL8, RPL23A, RPL39, RPL17
GO:0045765~regulation of angiogenesis	5	4.13223	0.0215363	CXCL8, TBXA2R, TNFAIP3, UTS2, SULF1
GO:0001818~negative regulation of cytokine production	5	4.13223	0.0218523	HERC5, IL33, RABGEF1, TNFAIP3, GBP1
GO:0070972~protein localization to endoplasmic reticulum	4	3.30579	0.0232268	RPL41, RPL23A, RPL39, RPL17
GO:0002819~regulation of adaptive immune response	4	3.30579	0.0232268	IL33, HLX, TNFAIP3, FADD
GO:0061041~regulation of wound healing	4	3.30579	0.0232268	TBXA2R, MYOD1, TXK, TNFAIP3
GO:0010604~positive regulation of macromolecule metabolic process	22	18.1818	0.0242347	EIF5AL1, IL33, RNASEL, EPHA7, ENDOG, FOXD1, HLF, AUTS2, TNFRSF18, TXK, NR2F1, TNFAIP3, MAPK8IP2, CTGF, PSMA6, BMP2, ARL2BP, LHX2, MYOD1, UTS2, FADD, DACT1
GO:0031399~regulation of protein modification process	15	12.3967	0.0246753	EPHA7, AUTS2, TNFRSF18, TNFAIP3, MAPK8IP2, CTGF, RGS4, HERC5, RABGEF1, PSMA6, BMP2, ARL2BP, CAMK2N2, GBP1, DACT1
GO:0051246~regulation of protein metabolic process	20	16.5289	0.0249318	EIF5AL1, IL33, EPHA7, AUTS2, TNFRSF18, TNFAIP3, MAPK8IP2, CTGF, RGS4, HERC5, RABGEF1, PSMA6, LIN28B, BMP2, PCSK1N, ARL2BP, CAMK2N2, FADD, GBP1, DACT1
GO:0008016~regulation of heart contraction	5	4.13223	0.0251694	PDE4B, ITPR2, UTS2, CACNA1G, CTGF
GO:0035239~tube morphogenesis	6	4.95868	0.0252297	BMP2, EPHA7, FOXD1, HLX, LHX2, DACT1
GO:0051223~regulation of protein transport	9	7.43802	0.0254458	IL33, RABGEF1, RANBP3L, ARL2BP, DACT3, ITPR2, UTS2, GBP1, DACT1
GO:0032663~regulation of interleukin-2 production	3	2.47934	0.025486	PDE4B, TNFAIP3, GBP1
GO:0044236~multicellular organism metabolic process	4	3.30579	0.0256453	MMP13, MMP2, UTS2, CTGF
GO:0045944~positive regulation of transcription from RNA polymerase II promoter	11	9.09091	0.0256668	IL33, RNASEL, BMP2, FOXD1, HLF, AUTS2, LHX2, MYOD1, TXK, NR2F1, FADD
GO:1901362~organic cyclic compound biosynthetic process	31	25.6198	0.0258006	RNASEL, ZNF570, HLF, GPR87, TXK, TNFAIP3, CTGF, HLX, ZNF628, CCDC85B, FADD, ZFPL1, RPL39, RPL17, DACT1, BATF2, IL33, RPL41, FOXD1, AUTS2, ARID5A, NR2F1, RPL23A, SULF1, PSMA6, BMP2, LIN28B, ARL2BP, LHX2, ZNF837, MYOD1
GO:0001944~vasculature development	8	6.61157	0.0260955	CXCL8, TBXA2R, MMP2, TNFAIP3, UTS2, TGFBI, SULF1, CTGF
GO:0009057~macromolecule catabolic process	12	9.91736	0.0266453	HERC5, IL33, PSMA6, LIN28B, RPL41, ENDOG, PRPF18, TNFAIP3, RPL23A, RPL39, RPL17, DACT1
GO:1901701~cellular response to oxygen-containing compound	10	8.26446	0.0290867	RNASEL, ENDOG, CXCL8, GNG2, TBXA2R, MMP2, MYOD1, PDE4B, TNFAIP3, ITPR2
GO:0090304~nucleic acid metabolic process	34	28.0992	0.0292661	RNASEL, ZNF570, CXCL8, HLF, TXK, TNFAIP3, CTGF, HLX, ZNF628, CCDC85B, FADD, ZFPL1, RPL39, RPL17, DACT1, BATF2, IL33, RPL41, ENDOG, FOXD1, AUTS2, ARID5A, NR2F1, RPL23A, SULF1, PSMA6, BMP2, LIN28B, CTU1, PRPF18, ARL2BP, LHX2, ZNF837, MYOD1
GO:1901342~regulation of vasculature development	5	4.13223	0.029532	CXCL8, TBXA2R, TNFAIP3, UTS2, SULF1
GO:0060047~heart contraction	5	4.13223	0.029532	PDE4B, ITPR2, UTS2, CACNA1G, CTGF
GO:0009719~response to endogenous stimulus	14	11.5702	0.0306365	RNASEL, CXCL8, FOXD1, MMP2, NR2F1, TNFAIP3, ITPR2, SULF1, CTGF, BMP2, GNG2, MYOD1, PDE4B, SLIT3
GO:0003015~heart process	5	4.13223	0.0306886	PDE4B, ITPR2, UTS2, CACNA1G, CTGF
GO:0042325~regulation of phosphorylation	13	10.7438	0.0316452	EPHA7, TNFRSF18, TNFAIP3, MAPK8IP2, CTGF, RGS4, HERC5, RABGEF1, BMP2, ARL2BP, CAMK2N2, GBP1, DACT1
GO:0032623~interleukin-2 production	3	2.47934	0.0321925	PDE4B, TNFAIP3, GBP1
GO:0050865~regulation of cell activation	7	5.78512	0.032199	IL33, RABGEF1, HLX, TXK, TNFAIP3, FADD, CTGF
GO:2000027~regulation of organ morphogenesis	5	4.13223	0.032272	PSMA6, BMP2, TNFAIP3, SULF1, DACT1
GO:0002274~myeloid leukocyte activation	4	3.30579	0.0331105	IL33, BATF2, RABGEF1, CXCL8
GO:1903034~regulation of response to wounding	4	3.30579	0.0331105	TBXA2R, MYOD1, TXK, TNFAIP3
GO:0030155~regulation of cell adhesion	8	6.61157	0.0334032	BMP2, EPHA7, CXCL8, HLX, TNFRSF18, FADD, TGFBI, GBP1
GO:0008015~blood circulation	7	5.78512	0.0335602	TBXA2R, PDE4B, ITPR2, UTS2, NTS, CACNA1G, CTGF
GO:0071222~cellular response to lipopolysaccharide	4	3.30579	0.0342599	CXCL8, TBXA2R, PDE4B, TNFAIP3
GO:0003013~circulatory system process	7	5.78512	0.0346758	TBXA2R, PDE4B, ITPR2, UTS2, NTS, CACNA1G, CTGF
GO:0032270~positive regulation of cellular protein metabolic process	13	10.7438	0.0359431	EIF5AL1, IL33, EPHA7, AUTS2, TNFRSF18, TNFAIP3, MAPK8IP2, CTGF, PSMA6, BMP2, ARL2BP, FADD, DACT1
GO:0050792~regulation of viral process	5	4.13223	0.0364382	HERC5, IFITM1, RNASEL, CXCL8, TNFAIP3
GO:0030177~positive regulation of Wnt signaling pathway	4	3.30579	0.0372234	PSMA6, BMP2, SULF1, DACT1
GO:0071407~cellular response to organic cyclic compound	7	5.78512	0.0375696	LIN28B, BMP2, GNG2, MYOD1, NR2F1, PDE4B, ITPR2
GO:0002683~negative regulation of immune system process	6	4.95868	0.0377114	IL33, RABGEF1, HLX, TNFAIP3, FADD, GBP1
GO:0071219~cellular response to molecule of bacterial origin	4	3.30579	0.0378314	CXCL8, TBXA2R, PDE4B, TNFAIP3
GO:0002009~morphogenesis of an epithelium	7	5.78512	0.0378673	PSMA6, BMP2, EPHA7, FOXD1, LHX2, SULF1, DACT1
GO:0010557~positive regulation of macromolecule biosynthetic process	14	11.5702	0.0380902	EIF5AL1, IL33, RNASEL, FOXD1, HLF, AUTS2, TXK, NR2F1, CTGF, BMP2, LHX2, MYOD1, UTS2, FADD
GO:0019219~regulation of nucleobase-containing compound metabolic process	28	23.1405	0.0383084	RNASEL, ZNF570, CXCL8, HLF, GPR87, TXK, TNFAIP3, HLX, ZNF628, CCDC85B, FADD, ZFPL1, DACT1, BATF2, IL33, ENDOG, FOXD1, AUTS2, ARID5A, NR2F1, SULF1, PSMA6, BMP2, LIN28B, ARL2BP, LHX2, ZNF837, MYOD1
GO:0032729~positive regulation of interferon-gamma production	3	2.47934	0.0384286	TXK, PDE4B, FADD
GO:0010556~regulation of macromolecule biosynthetic process	28	23.1405	0.0386317	RNASEL, ZNF570, HLF, TXK, TNFAIP3, CTGF, HLX, ZNF628, CCDC85B, FADD, ZFPL1, DACT1, EIF5AL1, BATF2, IL33, FOXD1, AUTS2, ARID5A, NR2F1, SULF1, PSMA6, BMP2, LIN28B, ARL2BP, LHX2, ZNF837, MYOD1, UTS2
GO:0007275~multicellular organism development	32	26.4463	0.0389969	CXCL8, HLF, NOTCH2NL, TNFAIP3, CXCL1, SOBP, CTGF, TBXA2R, HLX, DACT3, SLIT3, FADD, DACT1, BATF2, IL33, EPHA7, ENDOG, FOXD1, TNFRSF18, MMP2, NR2F1, SULF1, MAPK8IP2, PSMA6, BMP2, MMP13, LHX2, MYOD1, MALL, UTS2, TGFBI, MNS1
GO:0065008~regulation of biological quality	25	20.6612	0.0390072	RNASEL, PALM2, TXK, TNFAIP3, ITPR2, NTS, CACNA1G, CTGF, PCSK1N, GNG2, TBXA2R, FTH1, PDE4B, FADD, DACT1, EPHA7, ENDOG, FOXD1, CYBRD1, MAPK8IP2, PSMA6, BMP2, ARL2BP, MALL, UTS2
GO:0050708~regulation of protein secretion	6	4.95868	0.0391358	IL33, RABGEF1, ARL2BP, ITPR2, UTS2, GBP1
GO:0001933~negative regulation of protein phosphorylation	6	4.95868	0.039497	RGS4, RABGEF1, CAMK2N2, TNFAIP3, GBP1, DACT1
GO:0006364~rRNA processing	5	4.13223	0.0395317	RNASEL, RPL41, RPL23A, RPL39, RPL17
GO:1905114~cell surface receptor signaling pathway involved in cell-cell signaling	7	5.78512	0.0396853	PSMA6, BMP2, GNG2, DACT3, MAPK8IP2, SULF1, DACT1
GO:0048856~anatomical structure development	35	28.9256	0.0399359	CXCL8, HLF, PALM2, TXK, NOTCH2NL, TNFAIP3, CXCL1, SOBP, CTGF, TBXA2R, HLX, DACT3, SLIT3, FADD, GBP1, DACT1, BATF2, IL33, EPHA7, ENDOG, FOXD1, TNFRSF18, MMP2, NR2F1, SULF1, MAPK8IP2, PSMA6, BMP2, MMP13, LHX2, MYOD1, MALL, UTS2, TGFBI, MNS1
GO:0044767~single-organism developmental process	35	28.9256	0.0401372	CXCL8, HLF, PALM2, TXK, NOTCH2NL, TNFAIP3, CXCL1, SOBP, CTGF, TBXA2R, HLX, DACT3, SLIT3, FADD, GBP1, DACT1, BATF2, IL33, EPHA7, ENDOG, FOXD1, TNFRSF18, MMP2, NR2F1, SULF1, MAPK8IP2, PSMA6, BMP2, MMP13, LHX2, MYOD1, MALL, UTS2, TGFBI, MNS1
GO:0051179~localization	37	30.5785	0.0401836	CXCL6, IFITM1, RNASEL, CXCL8, TNFAIP6, TNFAIP3, ITPR2, CXCL1, CACNA1G, CTGF, RABGEF1, RANBP3L, FTH1, PDE4B, DACT3, SLIT3, FADD, ZFPL1, GBP1, RPL39, RPL17, DACT1, EIF5AL1, IL33, RPL41, FOXD1, DYNLT3, TNFRSF18, RPL23A, SULF1, MAPK8IP2, BMP2, PRPF18, ARL2BP, MALL, UTS2, NACAD
GO:0019220~regulation of phosphate metabolic process	14	11.5702	0.0402707	EPHA7, GPR87, TNFRSF18, TNFAIP3, MAPK8IP2, CTGF, RGS4, HERC5, RABGEF1, BMP2, ARL2BP, CAMK2N2, GBP1, DACT1
GO:0007154~cell communication	39	32.2314	0.0404169	CXCL6, IFITM1, RNASEL, CXCL8, TNFAIP6, GPR87, TXK, NOTCH2NL, TNFAIP3, ITPR2, CXCL1, NTS, CACNA1G, CTGF, RGS4, RABGEF1, PCSK1N, GNG2, TBXA2R, PDE4B, DACT3, ZNF385B, SLIT3, FADD, GBP1, DACT1, IL33, EPHA7, FOXD1, TNFRSF18, MMP2, NR2F1, SULF1, MAPK8IP2, PSMA6, BMP2, ARL2BP, MYOD1, UTS2
GO:0051174~regulation of phosphorus metabolic process	14	11.5702	0.0404421	EPHA7, GPR87, TNFRSF18, TNFAIP3, MAPK8IP2, CTGF, RGS4, HERC5, RABGEF1, BMP2, ARL2BP, CAMK2N2, GBP1, DACT1
GO:0031331~positive regulation of cellular catabolic process	5	4.13223	0.0409023	IL33, PSMA6, ENDOG, TNFAIP3, DACT1
GO:0070201~regulation of establishment of protein localization	9	7.43802	0.0411317	IL33, RABGEF1, RANBP3L, ARL2BP, DACT3, ITPR2, UTS2, GBP1, DACT1
GO:0044248~cellular catabolic process	14	11.5702	0.0413069	IL33, RPL41, ENDOG, TNFAIP3, RPL23A, HERC5, GCSH, PSMA6, LIN28B, PRPF18, PDE4B, RPL39, RPL17, DACT1
GO:0031325~positive regulation of cellular metabolic process	21	17.3554	0.0419113	EIF5AL1, IL33, RNASEL, EPHA7, ENDOG, FOXD1, HLF, AUTS2, TNFRSF18, TXK, NR2F1, TNFAIP3, MAPK8IP2, CTGF, PSMA6, BMP2, ARL2BP, LHX2, MYOD1, FADD, DACT1
GO:0051252~regulation of RNA metabolic process	26	21.4876	0.0422486	RNASEL, ZNF570, CXCL8, HLF, TXK, TNFAIP3, HLX, ZNF628, CCDC85B, FADD, ZFPL1, DACT1, BATF2, IL33, FOXD1, AUTS2, ARID5A, NR2F1, SULF1, PSMA6, BMP2, LIN28B, ARL2BP, LHX2, ZNF837, MYOD1
GO:0016072~rRNA metabolic process	5	4.13223	0.0427717	RNASEL, RPL41, RPL23A, RPL39, RPL17
GO:0031349~positive regulation of defense response	6	4.95868	0.04284	IL33, PSMA6, MMP2, TXK, TNFAIP3, FADD
GO:0010467~gene expression	34	28.0992	0.0430425	RNASEL, ZNF570, HLF, TXK, TNFAIP3, CTGF, PCSK1N, HLX, ZNF628, CCDC85B, SLIT3, FADD, ZFPL1, RPL39, RPL17, DACT1, EIF5AL1, BATF2, IL33, RPL41, FOXD1, AUTS2, ARID5A, NR2F1, RPL23A, SULF1, PSMA6, BMP2, LIN28B, CTU1, PRPF18, LHX2, ZNF837, MYOD1
GO:0009889~regulation of biosynthetic process	29	23.9669	0.0433132	RNASEL, ZNF570, HLF, GPR87, TXK, TNFAIP3, CTGF, HLX, ZNF628, CCDC85B, FADD, ZFPL1, DACT1, EIF5AL1, BATF2, IL33, FOXD1, AUTS2, ARID5A, NR2F1, SULF1, PSMA6, BMP2, LIN28B, ARL2BP, LHX2, ZNF837, MYOD1, UTS2
GO:0002699~positive regulation of immune effector process	4	3.30579	0.043532	IL33, RABGEF1, HLX, FADD
GO:0090090~negative regulation of canonical Wnt signaling pathway	4	3.30579	0.0441906	PSMA6, BMP2, DACT3, DACT1
GO:0045936~negative regulation of phosphate metabolic process	7	5.78512	0.0451367	RGS4, RABGEF1, CAMK2N2, GPR87, TNFAIP3, GBP1, DACT1
GO:0010563~negative regulation of phosphorus metabolic process	7	5.78512	0.0451367	RGS4, RABGEF1, CAMK2N2, GPR87, TNFAIP3, GBP1, DACT1
GO:0050852~T cell receptor signaling pathway	4	3.30579	0.0455227	PSMA6, TXK, PDE4B, GBP1
GO:0009893~positive regulation of metabolic process	22	18.1818	0.0462358	EIF5AL1, IL33, RNASEL, EPHA7, ENDOG, FOXD1, HLF, AUTS2, TNFRSF18, TXK, NR2F1, TNFAIP3, MAPK8IP2, CTGF, PSMA6, BMP2, ARL2BP, LHX2, MYOD1, UTS2, FADD, DACT1
GO:0044271~cellular nitrogen compound biosynthetic process	32	26.4463	0.046686	RNASEL, ZNF570, HLF, GPR87, TXK, TNFAIP3, CTGF, HLX, ZNF628, CCDC85B, FADD, ZFPL1, RPL39, RPL17, DACT1, EIF5AL1, BATF2, IL33, RPL41, FOXD1, AUTS2, ARID5A, NR2F1, RPL23A, SULF1, PSMA6, BMP2, LIN28B, ARL2BP, LHX2, ZNF837, MYOD1
GO:0043903~regulation of symbiosis, encompassing mutualism through parasitism	5	4.13223	0.0471525	HERC5, IFITM1, RNASEL, CXCL8, TNFAIP3
GO:0048869~cellular developmental process	27	22.314	0.0474229	IFITM1, RNASEL, HLF, PALM2, TXK, NOTCH2NL, CTGF, HLX, CCDC85B, DACT3, SLIT3, FADD, GBP1, BATF2, IL33, EPHA7, FOXD1, MMP2, NR2F1, SULF1, MAPK8IP2, BMP2, LHX2, MYOD1, UTS2, TGFBI, MNS1
GO:1901654~response to ketone	4	3.30579	0.0475581	GNG2, TBXA2R, UTS2, SLIT3
GO:0001666~response to hypoxia	5	4.13223	0.0476542	BMP2, ENDOG, MMP2, ITPR2, UTS2
GO:0030308~negative regulation of cell growth	4	3.30579	0.0482464	EPHA7, CCDC85B, DACT3, SLIT3
GO:1903531~negative regulation of secretion by cell	4	3.30579	0.0482464	IL33, RABGEF1, UTS2, GBP1
GO:0071357~cellular response to type I interferon	3	2.47934	0.0485601	IFITM1, RNASEL, FADD
GO:0060337~type I interferon signaling pathway	3	2.47934	0.0485601	IFITM1, RNASEL, FADD
GO:1903506~regulation of nucleic acid-templated transcription	25	20.6612	0.0487071	RNASEL, ZNF570, HLF, TXK, TNFAIP3, HLX, ZNF628, CCDC85B, FADD, ZFPL1, DACT1, BATF2, IL33, FOXD1, AUTS2, ARID5A, NR2F1, SULF1, PSMA6, BMP2, LIN28B, ARL2BP, LHX2, ZNF837, MYOD1
GO:0006357~regulation of transcription from RNA polymerase II promoter	15	12.3967	0.0504239	BATF2, IL33, RNASEL, FOXD1, HLF, AUTS2, TXK, ARID5A, NR2F1, SULF1, BMP2, LHX2, MYOD1, FADD, DACT1
GO:0009059~macromolecule biosynthetic process	33	27.2727	0.0505941	RNASEL, ZNF570, HLF, TXK, TNFAIP3, CTGF, HLX, ZNF628, CCDC85B, FADD, ZFPL1, RPL39, RPL17, DACT1, EIF5AL1, BATF2, IL33, RPL41, CHST7, FOXD1, AUTS2, ARID5A, NR2F1, RPL23A, SULF1, PSMA6, BMP2, LIN28B, ARL2BP, LHX2, ZNF837, MYOD1, UTS2
GO:0045089~positive regulation of innate immune response	5	4.13223	0.050727	PSMA6, MMP2, TXK, TNFAIP3, FADD
GO:0001776~leukocyte homeostasis	3	2.47934	0.0509302	PDE4B, TNFAIP3, FADD
GO:0071216~cellular response to biotic stimulus	4	3.30579	0.0510489	CXCL8, TBXA2R, PDE4B, TNFAIP3
GO:0009056~catabolic process	16	13.2231	0.0512458	IL33, RPL41, ENDOG, MMP2, TNFAIP3, RPL23A, HERC5, GCSH, PSMA6, LIN28B, MMP13, PRPF18, PDE4B, RPL39, RPL17, DACT1
GO:2001141~regulation of RNA biosynthetic process	25	20.6612	0.051357	RNASEL, ZNF570, HLF, TXK, TNFAIP3, HLX, ZNF628, CCDC85B, FADD, ZFPL1, DACT1, BATF2, IL33, FOXD1, AUTS2, ARID5A, NR2F1, SULF1, PSMA6, BMP2, LIN28B, ARL2BP, LHX2, ZNF837, MYOD1
GO:0051171~regulation of nitrogen compound metabolic process	29	23.9669	0.0513757	RNASEL, ZNF570, CXCL8, HLF, GPR87, TXK, TNFAIP3, HLX, ZNF628, CCDC85B, FADD, ZFPL1, DACT1, EIF5AL1, BATF2, IL33, ENDOG, FOXD1, AUTS2, ARID5A, NR2F1, SULF1, PSMA6, BMP2, LIN28B, ARL2BP, LHX2, ZNF837, MYOD1
GO:0007165~signal transduction	36	29.7521	0.0513973	CXCL6, IFITM1, RNASEL, CXCL8, TNFAIP6, GPR87, TXK, NOTCH2NL, TNFAIP3, ITPR2, CXCL1, NTS, CTGF, RGS4, RABGEF1, PCSK1N, GNG2, TBXA2R, PDE4B, DACT3, ZNF385B, SLIT3, FADD, GBP1, DACT1, IL33, EPHA7, FOXD1, TNFRSF18, MMP2, NR2F1, SULF1, MAPK8IP2, PSMA6, BMP2, ARL2BP
GO:0032845~negative regulation of homeostatic process	4	3.30579	0.0517617	TNFAIP3, ITPR2, UTS2, FADD
GO:0030154~cell differentiation	25	20.6612	0.0525043	IFITM1, RNASEL, HLF, TXK, NOTCH2NL, CTGF, HLX, CCDC85B, DACT3, SLIT3, FADD, GBP1, BATF2, IL33, EPHA7, FOXD1, MMP2, NR2F1, SULF1, MAPK8IP2, BMP2, LHX2, MYOD1, UTS2, TGFBI
GO:0051247~positive regulation of protein metabolic process	13	10.7438	0.0528555	EIF5AL1, IL33, EPHA7, AUTS2, TNFRSF18, TNFAIP3, MAPK8IP2, CTGF, PSMA6, BMP2, ARL2BP, FADD, DACT1
GO:0045184~establishment of protein localization	16	13.2231	0.052933	EIF5AL1, IL33, RPL41, TNFAIP3, ITPR2, RPL23A, RABGEF1, RANBP3L, ARL2BP, DACT3, UTS2, NACAD, GBP1, RPL39, RPL17, DACT1
GO:0034340~response to type I interferon	3	2.47934	0.0533412	IFITM1, RNASEL, FADD
GO:0042326~negative regulation of phosphorylation	6	4.95868	0.0534385	RGS4, RABGEF1, CAMK2N2, TNFAIP3, GBP1, DACT1
GO:0022604~regulation of cell morphogenesis	7	5.78512	0.0536009	BMP2, EPHA7, PALM2, DACT3, SLIT3, MNS1, GBP1
GO:0006139~nucleobase-containing compound metabolic process	36	29.7521	0.0537347	RNASEL, ZNF570, CXCL8, HLF, GPR87, TXK, TNFAIP3, CTGF, HLX, ZNF628, CCDC85B, PDE4B, FADD, ZFPL1, RPL39, RPL17, DACT1, BATF2, IL33, RPL41, ENDOG, FOXD1, AUTS2, ARID5A, NR2F1, RPL23A, SULF1, PSMA6, BMP2, LIN28B, CTU1, PRPF18, ARL2BP, LHX2, ZNF837, MYOD1
GO:0034660~ncRNA metabolic process	7	5.78512	0.0543473	CTU1, LIN28B, RNASEL, RPL41, RPL23A, RPL39, RPL17
GO:0008625~extrinsic apoptotic signaling pathway via death domain receptors	3	2.47934	0.0545618	TNFRSF18, TNFAIP3, FADD
GO:0044700~single organism signaling	38	31.405	0.0552434	CXCL6, IFITM1, RNASEL, CXCL8, TNFAIP6, GPR87, TXK, NOTCH2NL, TNFAIP3, ITPR2, CXCL1, NTS, CACNA1G, CTGF, RGS4, RABGEF1, PCSK1N, GNG2, TBXA2R, PDE4B, DACT3, ZNF385B, SLIT3, FADD, GBP1, DACT1, IL33, EPHA7, FOXD1, TNFRSF18, MMP2, NR2F1, SULF1, MAPK8IP2, PSMA6, BMP2, ARL2BP, UTS2
GO:0015031~protein transport	15	12.3967	0.0553702	EIF5AL1, IL33, RPL41, ITPR2, RPL23A, RABGEF1, RANBP3L, ARL2BP, DACT3, UTS2, NACAD, GBP1, RPL39, RPL17, DACT1
GO:0019083~viral transcription	4	3.30579	0.0553983	RPL41, RPL23A, RPL39, RPL17
GO:0045069~regulation of viral genome replication	3	2.47934	0.0570325	IFITM1, RNASEL, CXCL8
GO:0031400~negative regulation of protein modification process	7	5.78512	0.0573966	RGS4, PSMA6, RABGEF1, CAMK2N2, TNFAIP3, GBP1, DACT1
GO:0002690~positive regulation of leukocyte chemotaxis	3	2.47934	0.0582823	CXCL6, CXCL8, CXCL1
GO:0032502~developmental process	35	28.9256	0.0585708	CXCL8, HLF, PALM2, TXK, NOTCH2NL, TNFAIP3, CXCL1, SOBP, CTGF, TBXA2R, HLX, DACT3, SLIT3, FADD, GBP1, DACT1, BATF2, IL33, EPHA7, ENDOG, FOXD1, TNFRSF18, MMP2, NR2F1, SULF1, MAPK8IP2, PSMA6, BMP2, MMP13, LHX2, MYOD1, MALL, UTS2, TGFBI, MNS1
GO:1903364~positive regulation of cellular protein catabolic process	4	3.30579	0.0591543	IL33, PSMA6, TNFAIP3, DACT1
GO:0016310~phosphorylation	17	14.0496	0.0591743	RNASEL, EPHA7, TNFRSF18, TXK, TNFAIP3, MAPK8IP2, CTGF, RGS4, HERC5, RABGEF1, PSMA6, BMP2, ARL2BP, MYOD1, CAMK2N2, GBP1, DACT1
GO:0048589~developmental growth	7	5.78512	0.0593541	EPHA7, MMP13, HLX, LHX2, MYOD1, TXK, SLIT3
GO:0021978~telencephalon regionalization	2	1.65289	0.0602153	BMP2, LHX2
GO:0030593~neutrophil chemotaxis	3	2.47934	0.0608105	CXCL8, PDE4B, CXCL1
GO:0045595~regulation of cell differentiation	13	10.7438	0.0611431	IFITM1, EPHA7, NR2F1, CTGF, BMP2, HLX, CCDC85B, MYOD1, DACT3, UTS2, SLIT3, FADD, GBP1
GO:0006413~translational initiation	4	3.30579	0.0614645	RPL41, RPL23A, RPL39, RPL17
GO:0023052~signaling	38	31.405	0.0622096	CXCL6, IFITM1, RNASEL, CXCL8, TNFAIP6, GPR87, TXK, NOTCH2NL, TNFAIP3, ITPR2, CXCL1, NTS, CACNA1G, CTGF, RGS4, RABGEF1, PCSK1N, GNG2, TBXA2R, PDE4B, DACT3, ZNF385B, SLIT3, FADD, GBP1, DACT1, IL33, EPHA7, FOXD1, TNFRSF18, MMP2, NR2F1, SULF1, MAPK8IP2, PSMA6, BMP2, ARL2BP, UTS2
GO:0048731~system development	28	23.1405	0.0627911	CXCL8, HLF, TNFAIP3, CXCL1, SOBP, CTGF, TBXA2R, HLX, DACT3, SLIT3, FADD, DACT1, BATF2, IL33, EPHA7, FOXD1, MMP2, NR2F1, SULF1, MAPK8IP2, PSMA6, BMP2, MMP13, LHX2, MYOD1, MALL, UTS2, TGFBI
GO:0050727~regulation of inflammatory response	5	4.13223	0.0629068	IL33, PSMA6, RABGEF1, TNFAIP6, TNFAIP3
GO:0019080~viral gene expression	4	3.30579	0.0638166	RPL41, RPL23A, RPL39, RPL17
GO:0030111~regulation of Wnt signaling pathway	5	4.13223	0.0640845	PSMA6, BMP2, DACT3, SULF1, DACT1
GO:0051048~negative regulation of secretion	4	3.30579	0.0646099	IL33, RABGEF1, UTS2, GBP1
GO:1903524~positive regulation of blood circulation	3	2.47934	0.0646721	TBXA2R, UTS2, CTGF
GO:0006029~proteoglycan metabolic process	3	2.47934	0.0646721	BMP2, CHST7, SULF1
GO:0030595~leukocyte chemotaxis	4	3.30579	0.0654077	CXCL6, CXCL8, PDE4B, CXCL1
GO:0001763~morphogenesis of a branching structure	4	3.30579	0.0662101	BMP2, EPHA7, FOXD1, SULF1
GO:0044267~cellular protein metabolic process	31	25.6198	0.0669239	RNASEL, TXK, TNFAIP3, CTGF, RGS4, HERC5, RABGEF1, PCSK1N, CAMK2N2, FADD, GBP1, RPL39, RPL17, DACT1, EIF5AL1, IL33, RPL41, EPHA7, AUTS2, TNFRSF18, MMP2, RPL23A, MAPK8IP2, PSMA6, BMP2, LIN28B, CTU1, MMP13, ARL2BP, MYOD1, TGFBI
GO:0000904~cell morphogenesis involved in differentiation	8	6.61157	0.0672382	BMP2, EPHA7, FOXD1, LHX2, DACT3, SLIT3, MAPK8IP2, GBP1
GO:0006396~RNA processing	9	7.43802	0.067636	CTU1, LIN28B, RNASEL, RPL41, PRPF18, MYOD1, RPL23A, RPL39, RPL17
GO:0032872~regulation of stress-activated MAPK cascade	4	3.30579	0.0702902	BMP2, MAPK8IP2, CTGF, DACT1
GO:0044260~cellular macromolecule metabolic process	48	39.6694	0.0710223	RNASEL, ZNF570, CXCL8, HLF, TXK, TNFAIP3, CTGF, RGS4, HERC5, RABGEF1, PCSK1N, HLX, ZNF628, CCDC85B, CAMK2N2, FADD, ZFPL1, GBP1, RPL39, RPL17, DACT1, EIF5AL1, BATF2, IL33, RPL41, EPHA7, CHST7, ENDOG, FOXD1, AUTS2, TNFRSF18, MMP2, ARID5A, NR2F1, RPL23A, SULF1, MAPK8IP2, PSMA6, BMP2, LIN28B, CTU1, MMP13, PRPF18, ARL2BP, LHX2, ZNF837, MYOD1, TGFBI
GO:0070302~regulation of stress-activated protein kinase signaling cascade	4	3.30579	0.0711196	BMP2, MAPK8IP2, CTGF, DACT1
GO:0030178~negative regulation of Wnt signaling pathway	4	3.30579	0.0711196	PSMA6, BMP2, DACT3, DACT1
GO:0046483~heterocycle metabolic process	36	29.7521	0.0711919	RNASEL, ZNF570, CXCL8, HLF, GPR87, TXK, TNFAIP3, CTGF, HLX, ZNF628, CCDC85B, PDE4B, FADD, ZFPL1, RPL39, RPL17, DACT1, BATF2, IL33, RPL41, ENDOG, FOXD1, AUTS2, ARID5A, NR2F1, RPL23A, SULF1, PSMA6, BMP2, LIN28B, CTU1, PRPF18, ARL2BP, LHX2, ZNF837, MYOD1
GO:0002062~chondrocyte differentiation	3	2.47934	0.0712857	BMP2, TGFBI, SULF1
GO:0097659~nucleic acid-templated transcription	25	20.6612	0.0718891	RNASEL, ZNF570, HLF, TXK, TNFAIP3, CTGF, HLX, ZNF628, CCDC85B, FADD, ZFPL1, DACT1, BATF2, IL33, FOXD1, AUTS2, ARID5A, NR2F1, SULF1, PSMA6, BMP2, LIN28B, LHX2, ZNF837, MYOD1
GO:0010646~regulation of cell communication	21	17.3554	0.0719967	EPHA7, CXCL8, FOXD1, TNFRSF18, TXK, TNFAIP3, ITPR2, SULF1, MAPK8IP2, CTGF, RGS4, RABGEF1, PSMA6, BMP2, ARL2BP, DACT3, UTS2, SLIT3, FADD, GBP1, DACT1
GO:0009891~positive regulation of biosynthetic process	14	11.5702	0.0722029	EIF5AL1, IL33, RNASEL, FOXD1, HLF, AUTS2, TXK, NR2F1, CTGF, BMP2, LHX2, MYOD1, UTS2, FADD
GO:0016055~Wnt signaling pathway	6	4.95868	0.072491	PSMA6, BMP2, GNG2, DACT3, SULF1, DACT1
GO:0198738~cell-cell signaling by wnt	6	4.95868	0.0730098	PSMA6, BMP2, GNG2, DACT3, SULF1, DACT1
GO:0009306~protein secretion	6	4.95868	0.0730098	IL33, RABGEF1, ARL2BP, ITPR2, UTS2, GBP1
GO:0051094~positive regulation of developmental process	10	8.26446	0.0737454	BMP2, CXCL8, FOXD1, TBXA2R, HLX, MYOD1, TNFAIP3, UTS2, MNS1, FADD
GO:1990266~neutrophil migration	3	2.47934	0.0739907	CXCL8, PDE4B, CXCL1
GO:0009896~positive regulation of catabolic process	5	4.13223	0.0745618	IL33, PSMA6, ENDOG, TNFAIP3, DACT1
GO:0030198~extracellular matrix organization	5	4.13223	0.0752038	MMP13, MMP2, TGFBI, SULF1, CTGF
GO:0043062~extracellular structure organization	5	4.13223	0.0758487	MMP13, MMP2, TGFBI, SULF1, CTGF
GO:0042254~ribosome biogenesis	5	4.13223	0.0758487	RNASEL, RPL41, RPL23A, RPL39, RPL17
GO:0006355~regulation of transcription, DNA-templated	24	19.8347	0.0759899	BATF2, IL33, RNASEL, ZNF570, FOXD1, HLF, AUTS2, TXK, ARID5A, NR2F1, TNFAIP3, SULF1, PSMA6, LIN28B, BMP2, HLX, LHX2, ZNF837, ZNF628, CCDC85B, MYOD1, FADD, ZFPL1, DACT1
GO:0048729~tissue morphogenesis	7	5.78512	0.0759953	PSMA6, BMP2, EPHA7, FOXD1, LHX2, SULF1, DACT1
GO:0010817~regulation of hormone levels	6	4.95868	0.0761659	PCSK1N, BMP2, FOXD1, ARL2BP, ITPR2, UTS2
GO:0065009~regulation of molecular function	20	16.5289	0.0778517	EPHA7, GPR87, TXK, TNFAIP3, CXCL1, MAPK8IP2, CTGF, RGS4, HERC5, RABGEF1, PSMA6, BMP2, PCSK1N, ARL2BP, TBXA2R, LHX2, CAMK2N2, PDE4B, FADD, DACT1
GO:0010769~regulation of cell morphogenesis involved in differentiation	5	4.13223	0.0784563	BMP2, EPHA7, DACT3, SLIT3, GBP1
GO:0006725~cellular aromatic compound metabolic process	36	29.7521	0.078577	RNASEL, ZNF570, CXCL8, HLF, GPR87, TXK, TNFAIP3, CTGF, HLX, ZNF628, CCDC85B, PDE4B, FADD, ZFPL1, RPL39, RPL17, DACT1, BATF2, IL33, RPL41, ENDOG, FOXD1, AUTS2, ARID5A, NR2F1, RPL23A, SULF1, PSMA6, BMP2, LIN28B, CTU1, PRPF18, ARL2BP, LHX2, ZNF837, MYOD1
GO:0022613~ribonucleoprotein complex biogenesis	6	4.95868	0.0788524	RNASEL, RPL41, PRPF18, RPL23A, RPL39, RPL17
GO:1903530~regulation of secretion by cell	7	5.78512	0.0797094	IL33, RABGEF1, ARL2BP, ITPR2, UTS2, GBP1, CACNA1G
GO:0072358~cardiovascular system development	9	7.43802	0.0802944	BMP2, CXCL8, TBXA2R, MMP2, TNFAIP3, UTS2, TGFBI, SULF1, CTGF
GO:0072359~circulatory system development	9	7.43802	0.0802944	BMP2, CXCL8, TBXA2R, MMP2, TNFAIP3, UTS2, TGFBI, SULF1, CTGF
GO:0090092~regulation of transmembrane receptor protein serine/threonine kinase signaling pathway	4	3.30579	0.0805334	BMP2, FOXD1, SULF1, DACT1
GO:0002698~negative regulation of immune effector process	3	2.47934	0.0822987	IL33, RABGEF1, HLX
GO:0090100~positive regulation of transmembrane receptor protein serine/threonine kinase signaling pathway	3	2.47934	0.0822987	BMP2, FOXD1, SULF1
GO:0002688~regulation of leukocyte chemotaxis	3	2.47934	0.0822987	CXCL6, CXCL8, CXCL1
GO:0044033~multi-organism metabolic process	4	3.30579	0.0823009	RPL41, RPL23A, RPL39, RPL17
GO:0030336~negative regulation of cell migration	4	3.30579	0.0823009	IL33, RABGEF1, IFITM1, SULF1
GO:0023051~regulation of signaling	21	17.3554	0.0824688	EPHA7, CXCL8, FOXD1, TNFRSF18, TXK, TNFAIP3, ITPR2, SULF1, MAPK8IP2, CTGF, RGS4, RABGEF1, PSMA6, BMP2, ARL2BP, DACT3, UTS2, SLIT3, FADD, GBP1, DACT1
GO:0009790~embryo development	9	7.43802	0.0837664	BMP2, ENDOG, CXCL8, HLX, LHX2, MMP2, SOBP, SULF1, DACT1
GO:0007167~enzyme linked receptor protein signaling pathway	9	7.43802	0.0837664	RABGEF1, BMP2, EPHA7, FOXD1, MMP2, TXK, SULF1, CTGF, DACT1
GO:0072657~protein localization to membrane	6	4.95868	0.0838163	RABGEF1, RPL41, RPL23A, GBP1, RPL39, RPL17
GO:0001501~skeletal system development	6	4.95868	0.084378	BMP2, MMP13, MMP2, TGFBI, SULF1, CTGF
GO:0045596~negative regulation of cell differentiation	7	5.78512	0.084495	BMP2, EPHA7, HLX, CCDC85B, NR2F1, DACT3, GBP1
GO:0034645~cellular macromolecule biosynthetic process	31	25.6198	0.086175	RNASEL, ZNF570, HLF, TXK, TNFAIP3, CTGF, HLX, ZNF628, CCDC85B, FADD, ZFPL1, RPL39, RPL17, DACT1, EIF5AL1, BATF2, IL33, RPL41, CHST7, FOXD1, AUTS2, ARID5A, NR2F1, RPL23A, SULF1, PSMA6, BMP2, LIN28B, LHX2, ZNF837, MYOD1
GO:0071621~granulocyte chemotaxis	3	2.47934	0.0865561	CXCL8, PDE4B, CXCL1
GO:0003094~glomerular filtration	2	1.65289	0.0867854	UTS2, SULF1
GO:0032703~negative regulation of interleukin-2 production	2	1.65289	0.0867854	TNFAIP3, GBP1
GO:0007162~negative regulation of cell adhesion	4	3.30579	0.0867929	BMP2, HLX, TGFBI, GBP1
GO:0032880~regulation of protein localization	9	7.43802	0.0869273	IL33, RABGEF1, RANBP3L, ARL2BP, DACT3, ITPR2, UTS2, GBP1, DACT1
GO:0007169~transmembrane receptor protein tyrosine kinase signaling pathway	7	5.78512	0.0884374	RABGEF1, BMP2, EPHA7, MMP2, TXK, SULF1, CTGF
GO:0032940~secretion by cell	9	7.43802	0.088534	IL33, RABGEF1, FOXD1, ARL2BP, ITPR2, UTS2, GBP1, CACNA1G, CTGF
GO:0006366~transcription from RNA polymerase II promoter	14	11.5702	0.0887214	IL33, RNASEL, FOXD1, HLF, AUTS2, TXK, NR2F1, SULF1, CTGF, BMP2, LHX2, MYOD1, FADD, DACT1
GO:0009611~response to wounding	7	5.78512	0.0889373	GNG2, TBXA2R, MYOD1, TXK, TNFAIP3, ITPR2, CTGF
GO:0002757~immune response-activating signal transduction	6	4.95868	0.0889439	PSMA6, TXK, PDE4B, TNFAIP3, FADD, GBP1
GO:0009966~regulation of signal transduction	19	15.7025	0.0893594	EPHA7, CXCL8, FOXD1, TNFRSF18, TXK, TNFAIP3, SULF1, MAPK8IP2, CTGF, RGS4, RABGEF1, PSMA6, BMP2, ARL2BP, DACT3, SLIT3, FADD, GBP1, DACT1
GO:0040008~regulation of growth	7	5.78512	0.0904464	EPHA7, HLX, CCDC85B, MYOD1, DACT3, SLIT3, CTGF
GO:0007411~axon guidance	4	3.30579	0.0904604	EPHA7, FOXD1, LHX2, SLIT3
GO:0019079~viral genome replication	3	2.47934	0.0908788	IFITM1, RNASEL, CXCL8
GO:0032675~regulation of interleukin-6 production	3	2.47934	0.0908788	IL33, RABGEF1, TNFAIP3
GO:0097205~renal filtration	2	1.65289	0.0911411	UTS2, SULF1
GO:0097485~neuron projection guidance	4	3.30579	0.0913874	EPHA7, FOXD1, LHX2, SLIT3
GO:0001503~ossification	5	4.13223	0.0921589	IFITM1, BMP2, MMP13, MMP2, CTGF
GO:0097191~extrinsic apoptotic signaling pathway	4	3.30579	0.0923184	IL33, TNFRSF18, TNFAIP3, FADD
GO:0044057~regulation of system process	6	4.95868	0.0924522	TBXA2R, PDE4B, ITPR2, UTS2, CACNA1G, CTGF
GO:0045088~regulation of innate immune response	5	4.13223	0.0928726	PSMA6, MMP2, TXK, TNFAIP3, FADD
GO:2000146~negative regulation of cell motility	4	3.30579	0.0941924	IL33, RABGEF1, IFITM1, SULF1
GO:0050851~antigen receptor-mediated signaling pathway	4	3.30579	0.0951353	PSMA6, TXK, PDE4B, GBP1
GO:0032635~interleukin-6 production	3	2.47934	0.0952641	IL33, RABGEF1, TNFAIP3
GO:0071396~cellular response to lipid	6	4.95868	0.0954303	CXCL8, TBXA2R, MYOD1, NR2F1, PDE4B, TNFAIP3
GO:0048513~animal organ development	21	17.3554	0.0961149	BATF2, EPHA7, CXCL8, FOXD1, HLF, MMP2, TNFAIP3, SOBP, SULF1, CTGF, PSMA6, BMP2, MMP13, HLX, LHX2, MYOD1, DACT3, SLIT3, FADD, TGFBI, DACT1
GO:0050728~negative regulation of inflammatory response	3	2.47934	0.0967393	RABGEF1, TNFAIP6, TNFAIP3
GO:0031326~regulation of cellular biosynthetic process	27	22.314	0.0974259	RNASEL, ZNF570, HLF, GPR87, TXK, TNFAIP3, HLX, ZNF628, CCDC85B, FADD, ZFPL1, DACT1, EIF5AL1, BATF2, IL33, FOXD1, AUTS2, ARID5A, NR2F1, SULF1, PSMA6, BMP2, LIN28B, ARL2BP, LHX2, ZNF837, MYOD1
GO:0072594~establishment of protein localization to organelle	7	5.78512	0.0976749	RPL41, DACT3, TNFAIP3, RPL23A, RPL39, RPL17, DACT1
GO:0090150~establishment of protein localization to membrane	5	4.13223	0.0986774	RABGEF1, RPL41, RPL23A, RPL39, RPL17
GO:0032269~negative regulation of cellular protein metabolic process	9	7.43802	0.0994044	RGS4, PSMA6, RABGEF1, PCSK1N, LIN28B, CAMK2N2, TNFAIP3, GBP1, DACT1
GO:0090023~positive regulation of neutrophil chemotaxis	2	1.65289	0.0997909	CXCL8, CXCL1
GO:0002825~regulation of T-helper 1 type immune response	2	1.65289	0.0997909	IL33, HLX

## Sheet: GO_UP_dTAM_KDM1A
GO_UP_dTAM_KDM1Ai	Count	%	PValue	Genes
GO:0065008~regulation of biological quality	146	34.5972	5.60428e-12	RAB3B, CHRM3, CYFIP1, STEAP3, DGKD, DGKA, PLAT, SLC4A2, F11R, CELSR2, CDH1, CCRL2, DAG1, EPHB3, TGM2, UNC13B, CPT1A, USP2, CPT1C, GRIP2, NISCH, POR, CLDN4, WDR81, SLPI, ADAM8, ABCG1, FBN2, SEMA7A, CEMIP, SLC22A5, FLII, PSEN2, PDGFB, ITPR3, TNFRSF11A, ADRB2, ACACB, BAG6, RDH10, PLXNA2, ATP6V0A2, MBP, ZBTB7B, KCNN4, NTSR1, PLXNA3, SPTBN2, ABCA2, ACD, EGR2, JUP, WFS1, ATP8B1, ABCA3, SEC16A, PDE2A, G…
GO:0051179~localization	200	47.3934	1.60906e-11	CYFIP1, SLC4A2, F11R, MILR1, DAG1, TNS4, EPHB3, UNC13B, CPT1A, NUP210, ACSL1, CSNK1E, MFSD10, SLC5A6, NISCH, CLDN4, DDX39A, WDR81, PREB, EPHA2, SLC45A4, SLC22A5, TMEM63A, PDGFB, MST1R, ATP6V0A2, KCNN4, ZBTB7B, NTSR1, SPTBN2, ABCA2, ACD, EGR2, JAG1, JUP, ABCA3, LIF, NBEAL2, CCDC88B, SLC6A6, SLC6A9, CCDC88C, OGDH, SFXN3, SNAI1, HYOU1, SLC35F6, CDKN1A, NRP2, SLC35F2, CLTB, ABCC10, PEAR1, PTPRF, SHH,…
GO:0006810~transport	157	37.2038	2.82183e-11	RAB3B, CHRM3, CYFIP1, STEAP3, DGKD, AUP1, SLC4A2, F11R, CELSR2, MILR1, CDH1, GRB10, SLC26A11, CAPN1, TGM2, UNC13B, CPT1A, IL4R, NUP210, ACSL1, CSNK1E, GRIP2, MFSD10, SLC5A6, NISCH, CLDN4, DDX39A, WDR81, ADAM8, PREB, ABCG1, OSBP2, SLC27A4, SLC45A4, CEMIP, SLC22A5, TMEM63A, PSEN2, PDGFB, SLC1A4, ITPR3, TNFRSF11A, MST1R, ADRB2, BAG6, ATP6V0A2, CYC1, ZBTB7B, KCNN4, NTSR1, SPTBN2, ABCA2, ACD, EGR2, OS…
GO:0051234~establishment of localization	157	37.2038	5.44419e-10	RAB3B, CHRM3, CYFIP1, STEAP3, DGKD, AUP1, SLC4A2, F11R, CELSR2, MILR1, CDH1, GRB10, SLC26A11, CAPN1, TGM2, UNC13B, CPT1A, IL4R, NUP210, ACSL1, CSNK1E, GRIP2, MFSD10, SLC5A6, NISCH, CLDN4, DDX39A, WDR81, ADAM8, PREB, ABCG1, OSBP2, SLC27A4, SLC45A4, CEMIP, SLC22A5, TMEM63A, PSEN2, PDGFB, SLC1A4, ITPR3, TNFRSF11A, MST1R, ADRB2, BAG6, ATP6V0A2, CYC1, ZBTB7B, KCNN4, NTSR1, SPTBN2, ABCA2, ACD, EGR2, OS…
GO:0048513~animal organ development	126	29.8578	1.18688e-09	SLC4A2, CELSR2, CDH1, RPS6KA1, DAG1, CAPN1, EPHB3, TGM2, MAP2K3, CPT1A, IL4R, USP2, SOX13, CSNK1E, KRT75, ADAM19, POR, CLDN4, ADAM15, COL8A1, ADAM8, EPHA2, SLC27A4, FBN2, SEMA7A, ANKRD11, PDGFB, TNFRSF11A, ADRB2, ACACB, EVPL, PPL, BAG6, STK36, PODXL, RDH10, PLXNA2, MBP, ZBTB7B, ST3GAL1, PLXNA3, SPTBN2, EGR2, JAG1, JUP, WFS1, ATP8B1, ABCA3, SEC16A, PDE2A, GOT2, LIF, NBEAL2, DHCR24, SYNJ2, TRAPPC9,…
GO:0006820~anion transport	39	9.24171	4.1928e-09	SLC20A1, SLC2A1, SLC1A4, TNFRSF11A, SLC4A2, ABCC10, SLC7A1, LRRC8A, SLC26A11, KCNN4, SLC25A23, LDLR, SLC25A25, NTSR1, ABCC3, ABCC1, CPT1A, SLC12A4, ACSL1, ATP8B1, ABCA3, GOT2, SLC39A14, MFSD10, CLCN7, SLC5A6, ANO1, SLC6A6, SLC7A5, CLCN6, CLDN4, SLC7A6, SLC6A9, SLCO4A1, IL1B, SFXN3, ESYT1, ABCG1, SLC27A4
GO:1902578~single-organism localization	111	26.3033	8.54045e-09	RAB3B, CHRM3, CYFIP1, STEAP3, F11R, CELSR2, MILR1, CDH1, GRB10, SLC26A11, TGM2, UNC13B, CPT1A, IL4R, ACSL1, GRIP2, MFSD10, SLC5A6, NISCH, ADAM8, PREB, ABCG1, EPHA2, OSBP2, SLC27A4, SLC45A4, CEMIP, SLC22A5, PSEN2, SLC1A4, ITPR3, TNFRSF11A, MST1R, ATP6V0A2, CYC1, ZBTB7B, KCNN4, NTSR1, ABCA2, OSBPL7, JUP, ATP8B1, ABCA3, SEC16A, GOT2, LIF, TRPV3, TIMM44, SYNJ2, SYT7, SLC6A6, DIAPH1, SLC6A9, SFXN3, LR…
GO:0044710~single-organism metabolic process	133	31.5166	1.96875e-08	DGKD, DGKA, GALNT18, CPNE7, HR, AUP1, ENO2, GALNT10, LOXL1, HS6ST3, FADS2, DAG1, GRB10, MAP2K3, CPT1A, PCYT2, ACSL1, ENTPD6, CPT1C, PLA2G15, NISCH, POR, ADAM15, WDR81, ADAM8, PLBD2, ABCG1, EPHA2, SLC27A4, SEMA7A, PDGFB, TNFRSF11A, MST1R, ADRB2, ACACB, BAG6, PTDSS2, MAN2A2, RDH10, MBP, CYC1, VARS2, ZBTB7B, ST3GAL1, NTSR1, APOBEC3C, ABCA2, TRAP1, OSBPL7, WFS1, ATP8B1, ABCA3, PDE2A, GOT2, LIF, DHCR2…
GO:0044765~single-organism transport	105	24.8815	2.2975e-08	RAB3B, CHRM3, CYFIP1, STEAP3, CELSR2, MILR1, CDH1, GRB10, SLC26A11, TGM2, UNC13B, CPT1A, IL4R, ACSL1, GRIP2, MFSD10, SLC5A6, NISCH, ADAM8, PREB, ABCG1, OSBP2, SLC27A4, SLC45A4, CEMIP, SLC22A5, SLC1A4, ITPR3, TNFRSF11A, MST1R, ATP6V0A2, CYC1, ZBTB7B, KCNN4, NTSR1, ABCA2, OSBPL7, JUP, ATP8B1, ABCA3, SEC16A, GOT2, LIF, TRPV3, TIMM44, SYNJ2, SYT7, SLC6A6, DIAPH1, SLC6A9, SFXN3, LRP10, SLC48A1, CDKN1A…
GO:0050878~regulation of body fluid levels	29	6.87204	2.36949e-08	CHRM3, DGKD, DGKA, PDGFB, PLAT, F11R, PEAR1, CELSR2, EGFR, THBD, SHH, CSRP1, P2RY2, FLNA, KCNN4, ZBTB7B, SERPIND1, WFS1, ITGA2, CAD, GOT2, VEGFA, ANO1, FA2H, CLDN4, AXL, MYH9, CD9, SLC29A1
GO:1901700~response to oxygen-containing compound	72	17.0616	3.75579e-08	BCAR3, CYFIP1, CHRM3, CDKN1A, ALAS1, EHMT2, SLC2A1, PLAT, ENO2, LOXL1, AKAP12, THBD, EEF2K, CDH1, DAG1, GRB10, CTSD, GIT1, TGM2, UNC13B, MAP2K3, SREBF1, ABCC1, CPT1A, ACSL1, ITGA2, CAD, RANGAP1, SLC39A14, ANO1, SLC7A5, MN1, POR, CLDN4, ADAM15, SLPI, IL1B, TFF1, SLC29A1, ABCG1, SLC27A4, PDGFB, ATP1A3, ADRB2, TNFRSF11A, ATP1A1, ADCY7, EGFR, P2RY2, HSF1, MBP, CYC1, BAK1, ZBTB7B, LDLR, TRAP1, ABCA2, …
GO:0006811~ion transport	71	16.8246	4.13457e-08	RAB3B, CHRM3, STEAP3, SLC2A1, SLC4A2, ABCC10, SEC61A1, SLC26A11, CAPN1, ABCC3, ABCC1, CPT1A, ACSL1, NIPA1, SLC39A14, MFSD10, SLC22A23, SLC5A6, ANO1, SLC7A5, CLDN4, SLC7A6, SLCO4A1, IL1B, ABCG1, SLC27A4, CAMK2B, CEMIP, SLC22A5, TMEM63A, AHNAK, SLC20A1, PSEN2, PDGFB, ATP1A3, SLC1A4, ITPR3, ADRB2, TNFRSF11A, ATP1A1, SLC7A1, RELN, ATP6V0A2, FLNA, LRRC8A, CYC1, BAK1, KCNN4, SLC25A23, LDLR, NTSR1, SLC2…
GO:0015711~organic anion transport	32	7.58294	6.46787e-08	SLC2A1, SLC1A4, TNFRSF11A, SLC4A2, ABCC10, SLC7A1, LRRC8A, KCNN4, SLC25A23, LDLR, SLC25A25, NTSR1, ABCC3, ABCC1, CPT1A, ACSL1, ATP8B1, ABCA3, GOT2, SLC39A14, MFSD10, SLC5A6, SLC6A6, SLC7A5, SLC7A6, SLC6A9, SLCO4A1, IL1B, SFXN3, ESYT1, ABCG1, SLC27A4
GO:0044707~single-multicellular organism process	186	44.0758	1.29028e-07	EPHB6, CHRM3, CYFIP1, DGKD, DGKA, EHMT2, PLAT, SLC4A2, F11R, CELSR2, LOXL1, CDH1, RPS6KA1, DAG1, CAPN1, EPHB3, TGM2, MAP2K3, CPT1A, IL4R, USP2, SOX13, CSNK1E, KRT75, ADAM19, POR, CLDN4, ADAM15, COL8A1, ADAM8, ABCG1, NGEF, EPHA2, SLC27A4, FBN2, SEMA7A, SLC22A5, ANKRD11, PDGFB, ITPR3, TNFRSF11A, MST1R, ADRB2, ACACB, EVPL, PPL, NPAS2, BAG6, STK36, PODXL, RDH10, PLXNA2, CDH24, MBP, ZBTB7B, KCNN4, ST3…
GO:0002064~epithelial cell development	21	4.9763	1.46197e-07	CDKN1A, JAG1, LAMB2, WNT7B, PDE2A, PDGFB, SHROOM3, WNT7A, F11R, SIPA1L3, FOSL2, VEGFA, ASXL1, PODXL, IL1B, FASN, CCDC88C, FLNA, FLNB, E2F4, EPHA2
GO:0042493~response to drug	28	6.63507	2.30402e-07	BCAR3, CDKN1A, SLC22A5, EHMT2, ATP1A1, ACACB, EGFR, NPAS2, CDH1, HSF1, BAK1, ABCC3, SREBF1, ABCA2, ABCC1, CPT1A, ACSL1, ATP8B1, ITGA3, ABCA3, ITGA2, PDE2A, CAD, MFSD10, POR, CYP2S1, IL1B, SLC29A1
GO:0043588~skin development	23	5.45024	2.67081e-07	KRT81, KRT80, JAG1, JUP, ITGB4, ITGA3, ITGA2, DHCR24, KRT86, KRT75, EVPL, PPL, EGFR, FOSL2, FA2H, SHH, CLDN4, FRAS1, SNAI1, ITGA6, FLNB, EPHA2, SLC27A4
GO:0044699~single-organism process	339	80.3318	3.11321e-07	EPHB6, CYFIP1, EHMT2, CPNE7, SLC4A2, F11R, ENO2, HS6ST3, MILR1, ZFYVE28, RPS6KA1, DAG1, TNS4, SAMD10, EPHB3, UNC13B, CPT1A, PAQR5, ACSL1, STARD9, ENTPD6, SOX13, CSNK1E, CPT1C, MFSD10, SLC5A6, NISCH, POR, CLDN4, WDR81, COL8A1, PREB, NGEF, PLBD2, EPHA2, SLC45A4, SLC22A5, FLII, PDGFB, MST1R, EVPL, PPL, PTDSS2, RDH10, ATP6V0A2, KCNN4, ZBTB7B, RALGDS, ST3GAL1, NTSR1, SPTBN2, APOBEC3C, ABCA2, TRAP1, AC…
GO:0010033~response to organic substance	107	25.3555	3.5607e-07	CHRM3, CYFIP1, DGKD, EHMT2, PLAT, AUP1, ENO2, LOXL1, CDH1, CCRL2, DAG1, GRB10, TGM2, UNC13B, MAP2K3, CPT1A, IL4R, ACSL1, CSNK1E, POR, CLDN4, ADAM15, SLPI, ABCG1, EPHA2, SLC27A4, FBN2, KMT2D, SLC22A5, PDGFB, TNFRSF11A, MST1R, ADRB2, ACACB, BAG6, MBP, CYC1, ZBTB7B, NTSR1, ABCA2, EGR2, OSBPL7, JAG1, JUP, WFS1, ABCA3, PDE2A, GOT2, DHCR24, IGF2R, DIAPH1, FASN, NFE2L1, POMT2, BCAR3, CDKN1A, NRP2, ALAS1…
GO:0048731~system development	149	35.3081	6.50162e-07	EPHB6, CHRM3, CYFIP1, EHMT2, SLC4A2, CELSR2, LOXL1, CDH1, RPS6KA1, DAG1, CAPN1, EPHB3, TGM2, MAP2K3, CPT1A, IL4R, USP2, SOX13, CSNK1E, KRT75, ADAM19, POR, CLDN4, ADAM15, COL8A1, ADAM8, NGEF, EPHA2, SLC27A4, FBN2, SEMA7A, ANKRD11, PDGFB, TNFRSF11A, MST1R, ADRB2, ACACB, EVPL, PPL, NPAS2, BAG6, STK36, PODXL, RDH10, PLXNA2, MBP, ZBTB7B, ST3GAL1, PLXNA3, SPTBN2, ABCA2, ACD, EGR2, JAG1, JUP, WFS1, ATP8…
GO:0007275~multicellular organism development	158	37.4408	6.52379e-07	EPHB6, CHRM3, CYFIP1, DGKD, EHMT2, SLC4A2, F11R, CELSR2, LOXL1, CDH1, RPS6KA1, DAG1, CAPN1, EPHB3, TGM2, MAP2K3, CPT1A, IL4R, USP2, SOX13, CSNK1E, KRT75, ADAM19, POR, CLDN4, ADAM15, COL8A1, ADAM8, NGEF, EPHA2, SLC27A4, FBN2, SEMA7A, ANKRD11, PDGFB, TNFRSF11A, MST1R, ADRB2, ACACB, EVPL, PPL, NPAS2, BAG6, STK36, PODXL, RDH10, PLXNA2, CDH24, MBP, ZBTB7B, ST3GAL1, PLXNA3, SPTBN2, ABCA2, ACD, EGR2, JA…
GO:0044763~single-organism cellular process	288	68.2464	1.08457e-06	EPHB6, CYFIP1, EHMT2, SLC4A2, F11R, ENO2, HS6ST3, MILR1, RPS6KA1, DAG1, TNS4, EPHB3, UNC13B, CPT1A, PAQR5, ACSL1, STARD9, ENTPD6, SOX13, CSNK1E, CPT1C, MFSD10, NISCH, POR, CLDN4, WDR81, COL8A1, PREB, NGEF, PLBD2, EPHA2, FLII, PDGFB, MST1R, EVPL, PPL, PTDSS2, RDH10, ATP6V0A2, KCNN4, ZBTB7B, ST3GAL1, NTSR1, SPTBN2, APOBEC3C, ABCA2, TRAP1, EGR2, JAG1, JUP, ABCA3, PDE2A, LIF, NBEAL2, FOSL2, CCDC88B, …
GO:0055085~transmembrane transport	61	14.455	1.15579e-06	SLC35F6, CHRM3, SLC35F2, SLC2A1, SLC4A2, ABCC10, SEC61A1, SLC26A11, CAPN1, ABCC3, ABCC1, CPT1A, ACSL1, NIPA1, SLC39A14, SLC22A23, SLC5A6, ANO1, SLC7A5, CLDN4, SLC7A6, SLCO4A1, SLC29A1, ABCG1, CEMIP, SLC22A5, TMEM63A, AHNAK, SLC20A1, ATP1A3, SLC1A4, ITPR3, ADRB2, ATP1A1, SLC7A1, RELN, ATP6V0A2, FLNA, LRRC8A, CYC1, BAK1, KCNN4, SLC25A23, NTSR1, SLC25A25, ABCA2, SLC12A4, ATP8B1, ABCA3, TRPV3, TIMM44…
GO:0048856~anatomical structure development	170	40.2844	1.30629e-06	EPHB6, CHRM3, CYFIP1, DGKD, EHMT2, SLC4A2, F11R, CELSR2, LOXL1, CDH1, RPS6KA1, DAG1, CAPN1, EPHB3, TGM2, MAP2K3, CPT1A, IL4R, PAQR5, USP2, SOX13, CSNK1E, KRT75, ADAM19, POR, CLDN4, ADAM15, COL8A1, ADAM8, NGEF, EPHA2, OSBP2, SLC27A4, FBN2, KMT2D, SEMA7A, FLII, ARHGEF28, ANKRD11, PDGFB, TNFRSF11A, MST1R, ADRB2, ACACB, EVPL, PPL, NPAS2, BAG6, STK36, PODXL, RDH10, PLXNA2, CDH24, MBP, ZBTB7B, ST3GAL1,…
GO:0042908~xenobiotic transport	8	1.89573	1.75705e-06	ABCC3, SLC6A6, SLC7A5, ABCC1, ABCA3, SLC2A1, LRRC8A, ABCC10
GO:0042221~response to chemical	138	32.7014	1.7602e-06	EPHB6, CHRM3, CYFIP1, DGKD, EHMT2, CPNE7, PLAT, AUP1, ENO2, LOXL1, CDH1, CCRL2, DAG1, GRB10, EPHB3, TGM2, UNC13B, MAP2K3, CPT1A, IL4R, ACSL1, ENTPD6, CSNK1E, MFSD10, POR, CLDN4, ADAM15, SLPI, ADAM8, ABCG1, EPHA2, SLC27A4, FBN2, KMT2D, SEMA7A, SLC22A5, PDGFB, ITPR3, TNFRSF11A, MST1R, ADRB2, ACACB, NPAS2, BAG6, S100A16, PLXNA2, ATP6V0A2, MBP, CYC1, ZBTB7B, NTSR1, PLXNA3, ABCA2, TRAP1, EGR2, OSBPL7,…
GO:0030155~regulation of cell adhesion	40	9.47867	1.92567e-06	EPHB6, TNXB, PDGFB, F11R, SLC7A1, CELSR2, SHH, CDH1, PODXL, DAG1, PLXNA2, FLNA, FLOT2, MBP, ZBTB7B, EPHB3, PLXNA3, TGM2, IL4R, JAG1, JUP, LAMB2, ITGA3, ITGA2, LIF, SOX13, AP3D1, VEGFA, ADAM19, CCDC88B, ADAM15, DNAJA3, IL1B, COL8A1, CD9, PLXNB2, ITGA6, ADAM8, P4HB, EPHA2
GO:0010876~lipid localization	28	6.63507	2.02019e-06	SLC2A1, TNFRSF11A, ABCC10, ACACB, SHH, KCNN4, LDLR, NTSR1, ABCC3, SREBF1, ABCA2, OSBPL7, ABCC1, CPT1A, ACSL1, ATP8B1, ABCA3, GOT2, SYT7, ASXL1, EEPD1, SLCO4A1, IL1B, ESYT1, LRP10, ABCG1, OSBP2, SLC27A4
GO:0009888~tissue development	73	17.2986	2.93603e-06	CDKN1A, NRP2, ITGB5, ITGB4, FHL2, SLC4A2, F11R, CELSR2, SIPA1L3, SHH, CSRP1, DAG1, FLOT2, TGM2, DUSP4, DUSP5, CPT1A, ITGA3, ITGA2, SHROOM3, KRT75, SLC39A14, POR, ADAM15, POLR1B, IL1B, COL8A1, ITGA6, EPHA2, FBN2, KRT81, SEMA7A, KRT80, TNXB, SLC20A1, SEMA3B, PDGFB, ADRB2, KRT86, EVPL, PPL, EGFR, USP19, PODXL, RDH10, PLXNA2, FLNA, FLNB, E2F4, ZBTB7B, SLC25A25, EGR2, JAG1, LAMB2, SEMA4B, WNT7B, PDE2A…
GO:0098656~anion transmembrane transport	20	4.73934	2.95396e-06	SLC12A4, ABCC1, CPT1A, ACSL1, SLC20A1, SLC2A1, SLC1A4, SLC4A2, SLC7A1, CLCN7, SLC5A6, CLCN6, ANO1, SLC6A6, SLC7A5, SLC7A6, CLDN4, SLC26A11, LRRC8A, NTSR1
GO:0045785~positive regulation of cell adhesion	28	6.63507	3.43392e-06	EPHB6, PDGFB, F11R, SLC7A1, SHH, PODXL, DAG1, FLNA, FLOT2, ZBTB7B, TGM2, IL4R, JUP, LAMB2, ITGA3, ITGA2, LIF, SOX13, AP3D1, VEGFA, ADAM19, CCDC88B, DNAJA3, IL1B, COL8A1, ITGA6, ADAM8, P4HB
GO:0007155~cell adhesion	60	14.218	3.45497e-06	EPHB6, LGALS3BP, NRP2, ITGB5, ITGB4, F11R, PEAR1, CELSR2, PTPRF, MILR1, SHH, CSRP1, CDH1, DAG1, FLOT2, EPHB3, TGM2, IL4R, ITGA3, ITGA2, SOX13, ADAM19, CLDN4, ADAM15, IGDCC4, IL1B, COL8A1, MYH9, PKP1, ITGA6, ADAM8, EPHA2, TNXB, PDGFB, SLC7A1, EGFR, RELN, PODXL, PLXNA2, FLNA, CDH24, MBP, ZBTB7B, PCDH1, PLXNA3, JAG1, JUP, LAMB2, WNT7B, LIF, LSAMP, AP3D1, VEGFA, CCDC88B, KRT18, AXL, DNAJA3, CD9, PLXN…
GO:0032989~cellular component morphogenesis	48	11.3744	3.84531e-06	EPHB6, CAMK2B, CYFIP1, SEMA7A, NRP2, ITGB4, FLII, ARHGEF28, SEMA3B, F11R, CELSR2, SIPA1L3, EGFR, SHH, EEF2K, RELN, CSRP1, CDH1, DAG1, PLXNA2, FLNA, CDH24, FLNB, MBP, EPHB3, PLXNA3, ABCA2, EGR2, LAMB2, SEMA4B, WNT7B, SHROOM3, WNT7A, NBEAL2, VEGFA, ASXL1, DIAPH1, AXL, CCDC88C, CDC42EP3, MYH9, CD9, PLXNB2, ADAM8, P4HB, ZNF335, NGEF, EPHA2
GO:0022610~biological adhesion	60	14.218	3.92202e-06	EPHB6, LGALS3BP, NRP2, ITGB5, ITGB4, F11R, PEAR1, CELSR2, PTPRF, MILR1, SHH, CSRP1, CDH1, DAG1, FLOT2, EPHB3, TGM2, IL4R, ITGA3, ITGA2, SOX13, ADAM19, CLDN4, ADAM15, IGDCC4, IL1B, COL8A1, MYH9, PKP1, ITGA6, ADAM8, EPHA2, TNXB, PDGFB, SLC7A1, EGFR, RELN, PODXL, PLXNA2, FLNA, CDH24, MBP, ZBTB7B, PCDH1, PLXNA3, JAG1, JUP, LAMB2, WNT7B, LIF, LSAMP, AP3D1, VEGFA, CCDC88B, KRT18, AXL, DNAJA3, CD9, PLXN…
GO:0006629~lipid metabolic process	56	13.2701	4.87067e-06	DGKD, DGKA, CPNE7, AUP1, ABCC10, FADS2, SHH, SREBF1, ABCC1, CPT1A, PCYT2, ACSL1, CPT1C, PLA2G15, POR, WDR81, IL1B, ST6GALNAC4, ABCG1, MGLL, PLBD2, CERS2, SLC27A4, VAC14, TNXB, MVK, PDGFB, ADRB2, ATP1A1, ACACB, EGFR, AGPAT3, PTDSS2, RDH10, ST3GAL1, LDLR, ABCA2, OSBPL7, PTGES2, ATP8B1, ABCA3, DHCR24, SYNJ2, EFR3B, SORL1, FA2H, PC, FASN, CYP2S1, PI4KA, SNAI1, PNPLA6, DHCR7, LRP10, NFE2L1, CDS2
GO:0061024~membrane organization	46	10.9005	7.6203e-06	RAB3B, SLC35F6, AHNAK, F11R, EGFR, BAG6, SEC61A1, TMEM201, RELN, TMEM43, CDH1, FLNA, FLOT2, MBP, BAK1, KCNN4, ABCA2, ABCC1, SUN1, JUP, ATP8B1, ITGA3, ABCA3, ITGA2, SEC16A, AP3D1, DHCR24, SYNJ2, TRAPPC9, EFR3B, SORL1, GRIP2, SYT7, LETM1, TSPAN15, FA2H, KRT18, DNAJA3, PI4KA, EXOC3, MYH9, CD9, PREB, SEC24C, ABCG1, EPHA2
GO:0008610~lipid biosynthetic process	34	8.05687	7.64084e-06	VAC14, DGKD, MVK, DGKA, PDGFB, ATP1A1, ACACB, AGPAT3, FADS2, PTDSS2, RDH10, ST3GAL1, LDLR, SREBF1, ABCA2, OSBPL7, PCYT2, ACSL1, PTGES2, DHCR24, SYNJ2, PLA2G15, FA2H, POR, FASN, IL1B, SNAI1, PI4KA, DHCR7, ST6GALNAC4, MGLL, ABCG1, CERS2, CDS2
GO:0007169~transmembrane receptor protein tyrosine kinase signaling pathway	32	7.58294	7.71595e-06	EPHB6, BCAR3, CYFIP1, NRP2, DGKD, TNXB, ARHGEF28, PDGFB, PLAT, MST1R, ADRB2, EGFR, ZFYVE28, GRB10, ZBTB7B, CTSD, SAMD10, GIT1, EPHB3, SREBF1, TNK2, SLC39A14, SORL1, IGF2R, VEGFA, GIGYF1, GPRC5A, AXL, IL1B, NGEF, EPHA2, SLC27A4
GO:0016477~cell migration	59	13.981	7.97864e-06	NRP2, ITGB5, ITGB4, PLAT, F11R, CELSR2, PTPRF, SHH, CDH1, CCRL2, DAG1, GRB10, EPHB3, MAP2K3, ABCC1, SUN1, ITGA3, ITGA2, PLEKHG5, NISCH, CLDN4, ADAM15, IL1B, MYH9, ITGA6, ADAM8, CERS2, EPHA2, CAMK2B, SEMA7A, CEMIP, BRAT1, SEMA3B, PDGFB, MST1R, TNFRSF11A, EGFR, TMEM201, RELN, PODXL, PLXNA2, FLNA, PLXNA3, JAG1, JUP, LAMB2, SEMA4B, WNT7A, CDC42BPB, SLC8B1, SORL1, VEGFA, DIAPH1, AXL, SNAI1, OGDH, CD9,…
GO:0044767~single-organism developmental process	176	41.7062	8.46058e-06	EPHB6, CHRM3, CYFIP1, DGKD, EHMT2, SLC4A2, F11R, CELSR2, LOXL1, CDH1, RPS6KA1, DAG1, CAPN1, EPHB3, TGM2, UNC13B, MAP2K3, CPT1A, IL4R, PAQR5, USP2, SOX13, CSNK1E, KRT75, ADAM19, POR, CLDN4, ADAM15, COL8A1, ADAM8, ABCG1, NGEF, EPHA2, OSBP2, SLC27A4, FBN2, KMT2D, SEMA7A, FLII, ARHGEF28, ANKRD11, PDGFB, TNFRSF11A, MST1R, ADRB2, ACACB, EVPL, PPL, NPAS2, BAG6, STK36, PODXL, RDH10, PLXNA2, CDH24, MBP, Z…
GO:0065009~regulation of molecular function	101	23.9336	8.81918e-06	EPHB6, CHRM3, AUP1, F11R, ZFYVE28, RPS6KA1, DAG1, CAPN1, EPHB3, TGM2, MAP2K3, ACSL1, CSNK1E, POR, CLDN4, ADAM15, WDR81, SLPI, ADAM8, PREB, NGEF, EPHA2, SLC27A4, CEMIP, ARHGEF28, PSEN2, PDGFB, TNFRSF11A, MST1R, ADRB2, ACACB, STK36, PLXNA2, MBP, RALGDS, NTSR1, PLXNA3, ABCA2, ACD, JUP, WFS1, TNK2, LIF, TNFRSF10A, DHCR24, ARHGAP27, TRAPPC9, ARHGAP26, SLC6A9, BHLHE40, CCDC88C, PLXNB2, BCAR3, CDKN1A, S…
GO:0034220~ion transmembrane transport	49	11.6114	9.1475e-06	CHRM3, SLC2A1, SLC4A2, SEC61A1, SLC26A11, CAPN1, ABCC1, CPT1A, ACSL1, NIPA1, SLC39A14, SLC5A6, ANO1, SLC7A5, CLDN4, SLC7A6, CEMIP, SLC22A5, TMEM63A, AHNAK, SLC20A1, ATP1A3, SLC1A4, ITPR3, ADRB2, ATP1A1, SLC7A1, RELN, ATP6V0A2, FLNA, LRRC8A, CYC1, BAK1, KCNN4, SLC25A23, NTSR1, SLC25A25, SLC12A4, ATP8B1, TRPV3, SLC8B1, TPCN1, CLCN7, LETM1, SLC6A6, CLCN6, DIAPH1, SLC6A9, PLP2
GO:0006869~lipid transport	25	5.92417	9.33823e-06	SLC2A1, TNFRSF11A, ABCC10, SHH, KCNN4, LDLR, NTSR1, ABCC3, ABCA2, OSBPL7, ABCC1, CPT1A, ACSL1, ATP8B1, ABCA3, GOT2, SYT7, EEPD1, SLCO4A1, IL1B, ESYT1, LRP10, ABCG1, OSBP2, SLC27A4
GO:0071260~cellular response to mechanical stimulus	11	2.60664	9.99299e-06	IL1B, ITGA2, PDE2A, SLC2A1, DAG1, TNFRSF10A, BAK1, ATP1A1, F11R, MAP3K14, EGFR
GO:0009653~anatomical structure morphogenesis	91	21.564	1.01274e-05	EPHB6, BCAR3, CYFIP1, NRP2, ITGB5, ITGB4, TNFAIP2, FHL2, SLC4A2, F11R, CELSR2, SIPA1L3, SHH, EEF2K, SH3PXD2A, CSRP1, CDH1, RPS6KA1, DAG1, CAPN1, EPHB3, TGM2, DUSP4, DUSP5, ZHX2, IL4R, ITGA3, ITGA2, SOX13, SHROOM3, SLC7A5, POR, CLDN4, INF2, ADAM15, POLR1B, IL1B, CDC42EP3, COL8A1, MYH9, ITGA6, ADAM8, NGEF, EPHA2, FBN2, CAMK2B, SEMA7A, FLII, ARHGEF28, ANKRD11, SEMA3B, EGFR, RELN, PODXL, RDH10, PLXNA…
GO:0023051~regulation of signaling	110	26.0664	1.10661e-05	RAB3B, CYFIP1, DGKD, PLAT, F11R, ZFYVE28, CDH1, RPS6KA1, DAG1, GRB10, CAPN1, TGM2, UNC13B, MAP2K3, CPT1A, USP2, SOX13, CSNK1E, NISCH, POR, ADAM8, ABCG1, NGEF, EPHA2, SLC27A4, FBN2, KMT2D, SEMA7A, ARHGEF28, NOP2, PDGFB, ITPR3, TNFRSF11A, MST1R, ADRB2, STK36, ZBTB7B, KCNN4, NTSR1, ABCA2, TRAP1, EGR2, JAG1, JUP, WFS1, PDE2A, LIF, TNFRSF10A, ARHGAP27, ARHGAP26, SYT7, SLC6A6, SLC6A9, CCDC88C, SNAI1, H…
GO:0010646~regulation of cell communication	109	25.8294	1.23566e-05	RAB3B, CYFIP1, DGKD, PLAT, F11R, ZFYVE28, CDH1, RPS6KA1, DAG1, GRB10, CAPN1, TGM2, UNC13B, MAP2K3, CPT1A, USP2, SOX13, CSNK1E, NISCH, POR, ADAM8, ABCG1, NGEF, EPHA2, SLC27A4, FBN2, KMT2D, SEMA7A, ARHGEF28, NOP2, PDGFB, ITPR3, TNFRSF11A, MST1R, ADRB2, STK36, ZBTB7B, KCNN4, NTSR1, ABCA2, TRAP1, EGR2, JAG1, JUP, WFS1, PDE2A, LIF, TNFRSF10A, ARHGAP27, ARHGAP26, SYT7, SLC6A6, SLC6A9, CCDC88C, SNAI1, H…
GO:0071702~organic substance transport	86	20.3791	1.44708e-05	SLC48A1, RAB3B, USP36, CDKN1A, STEAP3, DGKD, CLTB, SLC2A1, AUP1, SLC4A2, ABCC10, SEC61A1, SHH, CDH1, GRB10, UNC13B, ABCC3, SREBF1, ABCC1, CPT1A, NUP210, ACSL1, RANGAP1, SLC39A14, GRIP2, MFSD10, SLC5A6, NISCH, ANO1, SLC7A5, SLC7A6, DDX39A, SLCO4A1, IL1B, MYH9, EXOC3, PREB, ADAM8, SLC29A1, ABCG1, OSBP2, SLC27A4, SLC45A4, CEMIP, SLC22A5, AP5Z1, SLC1A4, TNFRSF11A, SLC7A1, EGFR, NOL6, BAG6, ZDHHC18, H…
GO:0009605~response to external stimulus	88	20.8531	1.48263e-05	EPHB6, CYFIP1, CDKN1A, NRP2, EHMT2, SLC2A1, PLAT, AUP1, F11R, PTPRF, LOXL1, AKAP12, THBD, SHH, CCRL2, DAG1, GIT1, EPHB3, TGM2, MAP2K3, SREBF1, ABCC1, SUN1, CPT1A, IL4R, ACSL1, ITGA2, PLEKHG5, USP2, CAD, DDX56, SHROOM3, ANO1, SLC7A5, MN1, POR, SLPI, IL1B, ADAM8, MGLL, CERS2, EPHA2, SLC27A4, SEMA7A, SLC22A5, MVK, SEMA3B, PDGFB, MST1R, ADRB2, TNFRSF11A, ATP1A1, ACACB, ADCY7, PPL, EGFR, RELN, HSF1, P…
GO:0032502~developmental process	177	41.9431	1.52845e-05	EPHB6, CHRM3, CYFIP1, DGKD, EHMT2, SLC4A2, F11R, CELSR2, LOXL1, CDH1, RPS6KA1, DAG1, CAPN1, EPHB3, TGM2, UNC13B, MAP2K3, CPT1A, IL4R, PAQR5, USP2, SOX13, CSNK1E, KRT75, ADAM19, POR, CLDN4, ADAM15, COL8A1, ADAM8, ABCG1, NGEF, EPHA2, OSBP2, SLC27A4, FBN2, KMT2D, SEMA7A, FLII, ARHGEF28, ANKRD11, PDGFB, TNFRSF11A, MST1R, ADRB2, ACACB, EVPL, PPL, NPAS2, BAG6, STK36, PODXL, RDH10, PLXNA2, CDH24, MBP, Z…
GO:0098609~cell-cell adhesion	42	9.95261	1.67657e-05	EPHB6, TNXB, ITGB5, F11R, PEAR1, SLC7A1, CELSR2, PTPRF, EGFR, MILR1, SHH, CSRP1, CDH1, PODXL, FLNA, FLOT2, CDH24, MBP, ZBTB7B, PCDH1, IL4R, JAG1, JUP, ITGA3, ITGA2, WNT7B, SOX13, AP3D1, VEGFA, ADAM19, CCDC88B, CLDN4, KRT18, IGDCC4, DNAJA3, IL1B, PKP1, MYH9, CD9, PLXNB2, ITGA6, ADAM8
GO:0000902~cell morphogenesis	43	10.1896	1.72657e-05	EPHB6, CAMK2B, CYFIP1, SEMA7A, NRP2, ARHGEF28, SEMA3B, F11R, CELSR2, SIPA1L3, EGFR, SHH, EEF2K, RELN, CDH1, DAG1, PLXNA2, FLNA, CDH24, FLNB, MBP, EPHB3, PLXNA3, EGR2, LAMB2, SEMA4B, WNT7B, SHROOM3, WNT7A, NBEAL2, VEGFA, ASXL1, DIAPH1, AXL, CCDC88C, CDC42EP3, MYH9, PLXNB2, ADAM8, P4HB, ZNF335, NGEF, EPHA2
GO:0071526~semaphorin-plexin signaling pathway	8	1.89573	1.89038e-05	SEMA7A, NRP2, SEMA4B, SEMA3B, PLXNA2, PLXNB2, FLNA, PLXNA3
GO:0050790~regulation of catalytic activity	82	19.4313	1.96582e-05	EPHB6, BCAR3, CDKN1A, SH2D4A, AUP1, F11R, PTPRH, SIPA1L3, ZFYVE28, SH3PXD2A, RPS6KA1, DAG1, CAPN1, CNPPD1, CTSD, GIT1, EPHB3, TGM2, DUSP4, MAP2K3, PLEKHG4, DUSP5, SERPINB1, ACSL1, ITGA2, PLEKHG5, RANGAP1, DUSP8, SLC39A14, POR, CLDN4, GPRC5A, SLPI, WDR81, IL1B, ARHGEF4, PREB, ITGA6, ADAM8, RAPGEF5, GPRC5C, NGEF, EPHA2, SLC27A4, VAC14, CEMIP, TNXB, ARHGEF28, RGS16, PSEN2, PDGFB, DENND3, MST1R, ADRB…
GO:0015698~inorganic anion transport	15	3.5545	2.0427e-05	ABCC3, SLC12A4, ABCC1, SLC20A1, SLC1A4, SLC4A2, ABCC10, SLC39A14, CLCN7, SLC5A6, CLCN6, ANO1, CLDN4, SLC26A11, LRRC8A
GO:0009628~response to abiotic stimulus	48	11.3744	2.0766e-05	CYFIP1, CDKN1A, ALAS1, BRAT1, PSEN2, SLC2A1, PLAT, TNFRSF11A, ADRB2, ATP1A1, F11R, PPL, EGFR, AKAP12, THBD, EEF2K, HSF1, DAG1, ATP6V0A2, TNKS1BP1, LRRC8A, BAK1, SLC25A23, NTSR1, SUN1, JUP, ITGA2, USP2, PDE2A, TRPV3, TNFRSF10A, VEGFA, CLCN7, LETM1, ANO1, SLC7A5, CLCN6, ADAM15, DNAJA3, IL1B, BHLHE40, CD9, HYOU1, ADAM8, PKN1, P4HB, SLC29A1, MAP3K14
GO:0033993~response to lipid	42	9.95261	2.13365e-05	KMT2D, CDKN1A, ALAS1, ATP1A3, PLAT, TNFRSF11A, ATP1A1, ENO2, EGFR, LOXL1, AKAP12, THBD, HSF1, DAG1, MBP, LDLR, GIT1, NTSR1, MAP2K3, SREBF1, ABCA2, OSBPL7, CPT1A, ACSL1, ABCA3, ITGA2, WNT7B, CAD, WNT7A, IGF2R, ASXL1, SLC7A5, MN1, POR, CLDN4, ADAM15, SLPI, AXL, IL1B, PKN1, ABCG1, NFE2L1
GO:0044711~single-organism biosynthetic process	56	13.2701	2.24371e-05	DGKD, ALAS1, DGKA, ENO2, HS6ST3, FADS2, GRB10, SREBF1, PCYT2, ACSL1, CHPF2, ITGA2, CAD, AMPD2, SLC39A14, PLA2G15, POR, IL1B, B3GNT3, TKT, ST6GALNAC4, ABCG1, MGLL, CERS2, VAC14, PDXK, MVK, PDGFB, ADRB2, ATP1A1, ACACB, ADCY7, AGPAT3, PTDSS2, RDH10, HAS3, ST3GAL1, LDLR, NTSR1, ABCA2, OSBPL7, PTGES2, GOT2, DHCR24, NMNAT2, SYNJ2, COQ9, FA2H, PC, SLC6A9, FASN, PI4KA, SNAI1, DHCR7, NFE2L1, CDS2
GO:0009725~response to hormone	39	9.24171	2.25352e-05	BCAR3, KMT2D, CYFIP1, CDKN1A, FHL2, SLC2A1, ATP1A3, PLAT, TNFRSF11A, ATP1A1, EGFR, EEF2K, HSF1, DAG1, GRB10, MBP, CYC1, ZBTB7B, CTSD, SREBF1, ABCA2, EGR2, ACSL1, ITGA3, ABCA3, ITGA2, WNT7B, CAD, GOT2, DHCR24, RANGAP1, SLC39A14, SORL1, POR, CLDN4, IL1B, TFF1, PKN1, SLC27A4
GO:0044802~single-organism membrane organization	38	9.00474	2.28943e-05	RAB3B, SLC35F6, AHNAK, F11R, EGFR, BAG6, SEC61A1, TMEM201, RELN, TMEM43, CDH1, FLNA, FLOT2, BAK1, KCNN4, ABCA2, ABCC1, SUN1, JUP, ATP8B1, ITGA3, ABCA3, SEC16A, AP3D1, EFR3B, SORL1, GRIP2, SYT7, LETM1, TSPAN15, FA2H, KRT18, DNAJA3, EXOC3, MYH9, CD9, ABCG1, EPHA2
GO:0006793~phosphorus metabolic process	101	23.9336	2.38156e-05	EPHB6, DGKD, DGKA, ENO2, ZFYVE28, RPS6KA1, DAG1, GRB10, EPHB3, MAP2K3, PCYT2, ACSL1, ENTPD6, CSNK1E, PLA2G15, WDR81, ADAM8, PLBD2, EPHA2, SEMA7A, CEMIP, PDGFB, TNFRSF11A, MST1R, ADRB2, ACACB, PTDSS2, STK36, UAP1L1, MBP, CYC1, ST3GAL1, NTSR1, ABCA2, ABCA3, TNK2, PDE2A, LIF, TNFRSF10A, SYNJ2, COQ9, FASN, CCDC88C, OGDH, PI4KA, PLXNB2, MAP3K14, CDS2, BCAR3, CDKN1A, SH2D4A, PTPRH, PTPRF, AKAP12, EEF2K…
GO:0007589~body fluid secretion	11	2.60664	2.39914e-05	ANO1, CHRM3, P2RY2, GOT2, CAD, ZBTB7B, KCNN4, SLC29A1, CELSR2, EGFR, VEGFA
GO:0010243~response to organonitrogen compound	41	9.71564	2.40321e-05	BCAR3, CYFIP1, CDKN1A, EHMT2, SLC2A1, ATP1A3, PLAT, TNFRSF11A, ADRB2, EGFR, THBD, EEF2K, CDH1, P2RY2, HSF1, DAG1, GRB10, CYC1, ZBTB7B, CTSD, TGM2, SREBF1, ABCC1, CPT1A, EGR2, JAG1, JUP, ITGA2, PDE2A, CAD, GOT2, RANGAP1, SLC39A14, SORL1, DIAPH1, ANO1, SLC7A5, POR, IL1B, TFF1, SLC27A4
GO:0044255~cellular lipid metabolic process	44	10.4265	2.46716e-05	VAC14, DGKD, TNXB, MVK, DGKA, PDGFB, ADRB2, AUP1, ABCC10, ACACB, EGFR, AGPAT3, FADS2, PTDSS2, RDH10, ST3GAL1, LDLR, SREBF1, ABCA2, ABCC1, CPT1A, PCYT2, ACSL1, PTGES2, ABCA3, SYNJ2, CPT1C, EFR3B, SORL1, PLA2G15, FA2H, POR, WDR81, FASN, CYP2S1, IL1B, PI4KA, PNPLA6, ST6GALNAC4, MGLL, PLBD2, CERS2, SLC27A4, CDS2
GO:0046942~carboxylic acid transport	22	5.21327	2.51144e-05	ABCC3, ABCC1, CPT1A, ACSL1, ATP8B1, GOT2, SLC2A1, SLC1A4, TNFRSF11A, ABCC10, SLC7A1, SLC5A6, SLC6A6, SLC7A5, SLC7A6, SLC6A9, SLCO4A1, IL1B, SFXN3, LRRC8A, NTSR1, SLC27A4
GO:0015849~organic acid transport	22	5.21327	2.71894e-05	ABCC3, ABCC1, CPT1A, ACSL1, ATP8B1, GOT2, SLC2A1, SLC1A4, TNFRSF11A, ABCC10, SLC7A1, SLC5A6, SLC6A6, SLC7A5, SLC7A6, SLC6A9, SLCO4A1, IL1B, SFXN3, LRRC8A, NTSR1, SLC27A4
GO:0006796~phosphate-containing compound metabolic process	98	23.2227	3.56332e-05	EPHB6, DGKD, DGKA, ENO2, ZFYVE28, RPS6KA1, DAG1, GRB10, EPHB3, MAP2K3, PCYT2, ACSL1, ENTPD6, CSNK1E, PLA2G15, WDR81, ADAM8, PLBD2, EPHA2, SEMA7A, CEMIP, PDGFB, TNFRSF11A, MST1R, ADRB2, PTDSS2, STK36, MBP, CYC1, ST3GAL1, NTSR1, ABCA2, ABCA3, TNK2, PDE2A, LIF, TNFRSF10A, SYNJ2, COQ9, CCDC88C, OGDH, PI4KA, PLXNB2, MAP3K14, CDS2, BCAR3, CDKN1A, SH2D4A, PTPRH, PTPRF, AKAP12, EEF2K, TNKS1BP1, CNPPD1, G…
GO:0009611~response to wounding	31	7.34597	3.64927e-05	CDKN1A, DGKD, AHNAK, ITGB4, DGKA, PDGFB, PLAT, F11R, PEAR1, EVPL, PPL, PTPRF, EGFR, THBD, SHH, CSRP1, DAG1, FLNA, SERPIND1, LAMB2, ITGA2, WNT7A, RANGAP1, SYT7, VEGFA, CLDN4, ADAM15, AXL, MYH9, CD9, CERS2
GO:0007411~axon guidance	17	4.02844	3.68143e-05	EPHB6, CYFIP1, SEMA7A, EGR2, NRP2, LAMB2, SEMA4B, SEMA3B, VEGFA, SHH, RELN, DAG1, PLXNA2, PLXNB2, EPHB3, PLXNA3, EPHA2
GO:0097485~neuron projection guidance	17	4.02844	3.86844e-05	EPHB6, CYFIP1, SEMA7A, EGR2, NRP2, LAMB2, SEMA4B, SEMA3B, VEGFA, SHH, RELN, DAG1, PLXNA2, PLXNB2, EPHB3, PLXNA3, EPHA2
GO:0030855~epithelial cell differentiation	33	7.81991	4.34352e-05	KRT81, CDKN1A, KRT80, PDGFB, F11R, KRT86, EVPL, PPL, SIPA1L3, PODXL, FLNA, FLNB, E2F4, CPT1A, JAG1, LAMB2, ITGA2, WNT7B, PDE2A, LIF, SHROOM3, WNT7A, KRT75, FOSL2, VEGFA, ASXL1, FA2H, KRT18, FASN, IL1B, CCDC88C, NFE2L1, EPHA2
GO:0098657~import into cell	15	3.5545	4.40399e-05	RAB3B, SLC12A4, SLC2A1, TRPV3, ATP1A3, SLC1A4, ATP1A1, SLC7A1, SLC39A14, SLC5A6, SLC6A6, SLC7A5, SLC6A9, SLC29A1, NTSR1
GO:0015908~fatty acid transport	12	2.8436	4.64024e-05	ABCC3, ABCC1, CPT1A, ACSL1, SLCO4A1, IL1B, GOT2, SLC2A1, TNFRSF11A, ABCC10, NTSR1, SLC27A4
GO:0030154~cell differentiation	124	29.3839	4.74866e-05	EPHB6, CYFIP1, EHMT2, F11R, CELSR2, CDH1, RPS6KA1, DAG1, EPHB3, TGM2, CPT1A, IL4R, PAQR5, SOX13, CSNK1E, KRT75, POR, ADAM15, COL8A1, ADAM8, ABCG1, NGEF, EPHA2, OSBP2, FBN2, KMT2D, SEMA7A, FLII, ARHGEF28, PDGFB, TNFRSF11A, ADRB2, EVPL, PPL, BAG6, PODXL, RDH10, PLXNA2, MBP, ZBTB7B, ST3GAL1, PLXNA3, ABCA2, EGR2, JAG1, ATP8B1, TNK2, CBX2, PDE2A, LIF, NBEAL2, TRAPPC9, FOSL2, FA2H, SLC6A6, FASN, BHLHE4…
GO:0048732~gland development	25	5.92417	4.75801e-05	PRKCSH, TNFRSF11A, EGFR, SHH, CDH1, RPS6KA1, DAG1, CAPN1, ZBTB7B, EPHB3, TGM2, CPT1A, ITGA2, WNT7B, CAD, GOT2, IGF2R, VEGFA, ASXL1, SLC7A5, FA2H, KRT18, FASN, SLC29A1, EPHA2
GO:0009719~response to endogenous stimulus	62	14.6919	4.75921e-05	BCAR3, CYFIP1, CDKN1A, ITGB5, EHMT2, FHL2, SLC2A1, PLAT, THBD, EEF2K, CDH1, DAG1, GRB10, CTSD, TGM2, SREBF1, ABCC1, CPT1A, ACSL1, ITGA3, ITGA2, CAD, CSNK1E, RANGAP1, SLC39A14, ANO1, SLC7A5, POR, CLDN4, IL1B, TFF1, ABCG1, SLC27A4, FBN2, KMT2D, TNXB, PDGFB, ATP1A3, ADRB2, TNFRSF11A, ATP1A1, EGFR, P2RY2, HSF1, MBP, CYC1, ZBTB7B, LDLR, ABCA2, EGR2, JAG1, JUP, ABCA3, WNT7B, PDE2A, GOT2, WNT7A, DHCR24,…
GO:0048869~cellular developmental process	128	30.3318	5.03522e-05	EPHB6, CYFIP1, EHMT2, F11R, CELSR2, CDH1, RPS6KA1, DAG1, EPHB3, TGM2, MAP2K3, CPT1A, IL4R, PAQR5, SOX13, CSNK1E, KRT75, POR, ADAM15, COL8A1, ADAM8, ABCG1, NGEF, EPHA2, OSBP2, FBN2, KMT2D, SEMA7A, FLII, ARHGEF28, PDGFB, TNFRSF11A, ADRB2, EVPL, PPL, BAG6, PODXL, RDH10, PLXNA2, CDH24, MBP, ZBTB7B, ST3GAL1, PLXNA3, ABCA2, EGR2, JAG1, ATP8B1, TNK2, CBX2, PDE2A, LIF, NBEAL2, TRAPPC9, FOSL2, FA2H, SLC6A…
GO:0050896~response to stimulus	233	55.2133	5.10645e-05	EPHB6, CYFIP1, EHMT2, CPNE7, F11R, ENO2, MILR1, ZFYVE28, RPS6KA1, DAG1, SAMD10, EPHB3, UNC13B, CPT1A, ACSL1, ENTPD6, SOX13, CSNK1E, MFSD10, NISCH, POR, CLDN4, SLPI, NGEF, EPHA2, SLC22A5, PDGFB, MST1R, EVPL, PPL, S100A16, ATP6V0A2, KCNN4, ZBTB7B, RALGDS, ST3GAL1, NTSR1, APOBEC3C, ABCA2, TRAP1, ACD, EGR2, JAG1, JUP, ABCA3, PDE2A, LIF, CCDC88B, SLC6A9, CYP2S1, FASN, CCDC88C, SNAI1, HYOU1, SLC35F6, C…
GO:0035556~intracellular signal transduction	86	20.3791	5.21593e-05	BCAR3, CYFIP1, CHRM3, CDKN1A, DGKD, PRKCSH, DGKA, FHL2, F11R, PEAR1, SIPA1L3, AKAP12, SHH, RPS6KA1, CCRL2, DAG1, GRB10, GIT1, TGM2, UNC13B, DUSP4, MAP2K3, PLEKHG4, DUSP5, ITGA3, PLEKHG5, USP2, TRAF1, DUSP8, MUC5AC, NISCH, INF2, IL1B, CDC42EP3, ARHGEF4, ADAM8, RAPGEF5, NGEF, EPHA2, SEMA7A, TNXB, SLC20A1, ARHGEF28, NOP2, PSEN2, PDGFB, DENND3, ITPR3, MST1R, ADRB2, TNFRSF11A, ADCY7, CAMKK1, EGFR, BAG…
GO:0031099~regeneration	16	3.79147	5.29437e-05	CDKN1A, CPT1A, LAMB2, CAD, WNT7A, PTPRF, EGFR, IGF2R, SLC7A5, ADAM15, AXL, DAG1, CD9, FLNA, BAK1, CERS2
GO:0048468~cell development	75	17.7725	5.45342e-05	EPHB6, CYFIP1, CDKN1A, NRP2, ALAS1, ITGB4, EHMT2, FHL2, F11R, CELSR2, SIPA1L3, PTPRF, SHH, EEF2K, CSRP1, CDH1, DAG1, GIT1, EPHB3, TGM2, ZHX2, PAQR5, ITGA3, DDX56, SHROOM3, CSNK1E, SLC7A5, IL1B, MYH9, ITGA6, NGEF, CERS2, EPHA2, OSBP2, CAMK2B, KMT2D, SEMA7A, FLII, SEMA3B, PDGFB, EGFR, RELN, PODXL, RDH10, PLXNA2, FLNA, FLNB, MBP, E2F4, PLXNA3, ABCA2, EGR2, JAG1, LAMB2, ATP8B1, SEMA4B, WNT7B, PDE2A, …
GO:0071840~cellular component organization or biogenesis	184	43.6019	5.66198e-05	EPHB6, RAB3B, CYFIP1, DGKD, EHMT2, HR, AUP1, JADE2, F11R, ENO2, CELSR2, LOXL1, CDH1, ZMIZ2, RPS6KA1, DAG1, EPHB3, TGM2, UNC13B, IL4R, NUP210, PUS1, STARD9, KRT75, TUBA4A, GRIP2, NISCH, CLIP2, CLDN4, ADAM15, WDR81, COL8A1, PKP1, ADAM8, PREB, RAD54L2, ABCG1, NGEF, EPHA2, KMT2D, SEMA7A, FLII, ARHGEF28, KMT2B, NOP2, PSEN2, PDGFB, ADRB2, ACACB, EVPL, PPL, BAG6, PDCD11, STK36, PODXL, PLXNA2, CDH24, MBP…
GO:0032879~regulation of localization	92	21.8009	5.94459e-05	RAB3B, USP36, CYFIP1, SLC35F6, CHRM3, NRP2, DGKD, CELSR2, SHH, EEF2K, CDH1, DAG1, GRB10, CAPN1, CTSD, GIT1, TGM2, UNC13B, MAP2K3, SREBF1, CPT1A, IL4R, ACSL1, ITGA3, ITGA2, CSNK1E, RANGAP1, NISCH, ANO1, SLC7A5, CLDN4, ADAM15, IL1B, TFF2, PREB, ITGA6, ADAM8, ABCG1, CERS2, EPHA2, CAMK2B, SEMA7A, CEMIP, TNXB, AHNAK, SEMA3B, PDGFB, ITPR3, ADRB2, TNFRSF11A, ATP1A1, ACACB, EGFR, RELN, PODXL, P2RY2, PLXN…
GO:0070887~cellular response to chemical stimulus	95	22.5118	5.98232e-05	POMT2, BCAR3, CYFIP1, CHRM3, NRP2, ITGB5, EHMT2, CPNE7, PLAT, AUP1, AKAP12, SHH, EEF2K, CDH1, CCRL2, DAG1, GRB10, CTSD, GIT1, TGM2, UNC13B, ABCC3, MAP2K3, SREBF1, ABCC1, CPT1A, IL4R, ACSL1, ITGA3, ITGA2, PLEKHG5, CAD, TRAF1, CSNK1E, RANGAP1, SLC39A14, ANO1, SLC7A5, MN1, POR, ADAM15, IL1B, TFF2, ITGA6, ADAM8, SLC29A1, ABCG1, EPHA2, SLC27A4, FBN2, KMT2D, TNXB, SEMA3B, PDGFB, ATP1A3, MST1R, ADRB2, T…
GO:0015718~monocarboxylic acid transport	15	3.5545	6.09519e-05	ABCC3, ABCC1, CPT1A, ACSL1, ATP8B1, GOT2, SLC2A1, TNFRSF11A, ABCC10, SLC5A6, SLC6A6, SLCO4A1, IL1B, NTSR1, SLC27A4
GO:0014070~response to organic cyclic compound	42	9.95261	6.51397e-05	KMT2D, CDKN1A, ALAS1, EHMT2, PDGFB, ATP1A3, PLAT, TNFRSF11A, ATP1A1, ENO2, ACACB, EGFR, THBD, EEF2K, CDH1, P2RY2, HSF1, DAG1, MBP, BAK1, TGM2, SREBF1, ABCA2, OSBPL7, CPT1A, JUP, ACSL1, ABCA3, ITGA2, WNT7B, PDE2A, CAD, GOT2, WNT7A, DIAPH1, MN1, POR, CLDN4, IL1B, ITGA6, PKN1, NFE2L1
GO:0007166~cell surface receptor signaling pathway	89	21.09	6.7862e-05	EPHB6, BCAR3, CYFIP1, NRP2, DGKD, ITGB5, ITGB4, PLAT, CELSR2, PTPRF, ZFYVE28, MILR1, SHH, CCRL2, GRB10, CAPN1, CTSD, SAMD10, GIT1, EPHB3, TGM2, UNC13B, SREBF1, IL4R, ACSL1, ITGA3, ITGA2, SOX13, TRAF1, CSNK1E, SLC39A14, GRIP2, GIGYF1, POR, GPRC5A, ADAM15, IL1B, MYH9, TFF2, ITGA6, ADAM8, SLC29A1, NGEF, EPHA2, SLC27A4, FBN2, SEMA7A, TNXB, ARHGEF28, SEMA3B, PSEN2, PDGFB, MST1R, ADRB2, TNFRSF11A, EGFR…
GO:0042060~wound healing	26	6.16114	6.8991e-05	CDKN1A, DGKD, AHNAK, DGKA, PDGFB, PLAT, F11R, PEAR1, EVPL, PPL, EGFR, THBD, SHH, CSRP1, DAG1, FLNA, SERPIND1, ITGA2, WNT7A, SYT7, VEGFA, CLDN4, ADAM15, AXL, MYH9, CD9
GO:1901701~cellular response to oxygen-containing compound	46	10.9005	7.34338e-05	BCAR3, CYFIP1, CHRM3, EHMT2, PDGFB, ATP1A3, PLAT, ADRB2, ADCY7, EGFR, EEF2K, CDH1, P2RY2, HSF1, DAG1, GRB10, ZBTB7B, CTSD, LDLR, GIT1, TGM2, UNC13B, MAP2K3, SREBF1, TRAP1, OSBPL7, ABCC1, CPT1A, JUP, ITGA2, WNT7B, PDE2A, RANGAP1, SLC39A14, SORL1, ANO1, SLC7A5, MN1, POR, ADAM15, AXL, IL1B, SLC29A1, ABCG1, NFE2L1, SLC27A4
GO:1901652~response to peptide	27	6.3981	7.44434e-05	BCAR3, CYFIP1, SLC2A1, ATP1A3, TNFRSF11A, ADRB2, EEF2K, HSF1, DAG1, GRB10, CYC1, ZBTB7B, CTSD, SREBF1, ABCC1, EGR2, JAG1, CAD, GOT2, RANGAP1, SLC39A14, SORL1, ANO1, POR, IL1B, TFF1, SLC27A4
GO:0043085~positive regulation of catalytic activity	49	11.6114	7.57357e-05	EPHB6, BCAR3, CDKN1A, F11R, SIPA1L3, DAG1, CTSD, EPHB3, TGM2, MAP2K3, DUSP5, ACSL1, ITGA2, RANGAP1, POR, CLDN4, GPRC5A, IL1B, ITGA6, ADAM8, RAPGEF5, GPRC5C, NGEF, EPHA2, SLC27A4, VAC14, CEMIP, RGS16, PSEN2, PDGFB, MST1R, ADRB2, TNFRSF11A, CAMKK1, EGFR, RELN, HSF1, MBP, BAK1, RALGDS, ACD, WNT7B, TNFRSF10A, ARHGAP27, SORL1, VEGFA, AXL, DNAJA3, PKN1
GO:0033036~macromolecule localization	93	22.0379	7.80018e-05	RAB3B, USP36, CDKN1A, STEAP3, DGKD, CLTB, TNFAIP2, SLC2A1, AUP1, F11R, ABCC10, SEC61A1, SHH, CDH1, FLOT2, TNS4, CTSD, UNC13B, ABCC3, SREBF1, ABCC1, SUN1, CPT1A, NUP210, ACSL1, ITGA3, ITGA2, SHROOM3, CSNK1E, RANGAP1, GRIP2, ANO1, DDX39A, SLCO4A1, IL1B, MYH9, EXOC3, PREB, ADAM8, ABCG1, EPHA2, OSBP2, SLC27A4, FBN2, CEMIP, AP5Z1, TNFRSF11A, ACACB, EGFR, NOL6, BAG6, ZDHHC18, TMEM201, RELN, HSF1, FLNA,…
GO:0016043~cellular component organization	179	42.4171	8.05519e-05	EPHB6, RAB3B, CYFIP1, DGKD, EHMT2, HR, AUP1, JADE2, F11R, ENO2, CELSR2, LOXL1, CDH1, ZMIZ2, RPS6KA1, DAG1, EPHB3, TGM2, UNC13B, IL4R, NUP210, PUS1, STARD9, KRT75, TUBA4A, GRIP2, NISCH, CLIP2, CLDN4, ADAM15, WDR81, COL8A1, PKP1, ADAM8, PREB, RAD54L2, ABCG1, NGEF, EPHA2, KMT2D, SEMA7A, FLII, ARHGEF28, KMT2B, NOP2, PSEN2, PDGFB, ADRB2, ACACB, EVPL, PPL, BAG6, STK36, PODXL, PLXNA2, CDH24, MBP, ZBTB7B…
GO:0048583~regulation of response to stimulus	123	29.1469	8.36706e-05	CYFIP1, DGKD, PLAT, F11R, ZFYVE28, RPS6KA1, DAG1, GRB10, CAPN1, TGM2, UNC13B, MAP2K3, IL4R, USP2, SOX13, CSNK1E, POR, CLDN4, ADAM8, ABCG1, NGEF, EPHA2, SLC27A4, FBN2, KMT2D, SEMA7A, ARHGEF28, NOP2, PDGFB, TNFRSF11A, MST1R, ADRB2, NPAS2, BAG6, STK36, ZBTB7B, KCNN4, NTSR1, PLXNA3, ABCA2, TRAP1, JAG1, JUP, WFS1, PDE2A, LIF, TNFRSF10A, ARHGAP27, ARHGAP26, SLC6A9, CCDC88C, SNAI1, HYOU1, MAP3K14, BCAR3…
GO:0098739~import across plasma membrane	13	3.08057	8.44101e-05	SLC12A4, SLC2A1, TRPV3, ATP1A3, SLC1A4, ATP1A1, SLC7A1, SLC39A14, SLC5A6, SLC6A6, SLC7A5, SLC6A9, NTSR1
GO:1905039~carboxylic acid transmembrane transport	11	2.60664	9.05013e-05	SLC5A6, SLC6A6, SLC7A5, SLC7A6, ABCC1, CPT1A, ACSL1, SLC2A1, SLC1A4, SLC7A1, NTSR1
GO:0051716~cellular response to stimulus	196	46.4455	9.48225e-05	EPHB6, CYFIP1, EHMT2, CPNE7, F11R, MILR1, ZFYVE28, RPS6KA1, DAG1, SAMD10, EPHB3, UNC13B, CPT1A, ACSL1, SOX13, CSNK1E, NISCH, POR, NGEF, EPHA2, PDGFB, MST1R, ATP6V0A2, KCNN4, ZBTB7B, RALGDS, NTSR1, ABCA2, TRAP1, ACD, EGR2, JAG1, JUP, PDE2A, LIF, SLC6A9, CYP2S1, FASN, CCDC88C, SNAI1, HYOU1, SLC35F6, CDKN1A, NRP2, PEAR1, SIPA1L3, PTPRF, AKAP12, SHH, TNKS1BP1, CTSD, GIT1, DLGAP4, DUSP4, SREBF1, DUSP5…
GO:1903825~organic acid transmembrane transport	11	2.60664	9.7536e-05	SLC5A6, SLC6A6, SLC7A5, SLC7A6, ABCC1, CPT1A, ACSL1, SLC2A1, SLC1A4, SLC7A1, NTSR1
GO:0022604~regulation of cell morphogenesis	25	5.92417	0.000110341	CAMK2B, CYFIP1, SEMA7A, SEMA3B, F11R, EEF2K, RELN, CDH1, DAG1, PLXNA2, FLNA, MBP, EPHB3, PLXNA3, SEMA4B, SHROOM3, WNT7A, VEGFA, DIAPH1, CLDN4, CDC42EP3, MYH9, PLXNB2, P4HB, NGEF
GO:0050767~regulation of neurogenesis	36	8.53081	0.000115893	CAMK2B, CYFIP1, SEMA7A, SEMA3B, PTPRF, EGFR, SHH, EEF2K, RELN, CDH1, DAG1, PLXNA2, FLNA, MBP, EPHB3, PLXNA3, TGM2, ZHX2, EGR2, JAG1, ITGA3, SEMA4B, DDX56, LIF, WNT7A, CSNK1E, SORL1, VEGFA, SLC7A5, IL1B, BHLHE40, PLXNB2, ITGA6, ZNF335, NGEF, CERS2
GO:0044281~small molecule metabolic process	68	16.1137	0.000127581	SLC2A1, ENO2, ABCC10, SGSH, HS6ST3, FADS2, GRB10, GIT1, SREBF1, ABCC1, CPT1A, ACSL1, CHPF2, CAD, ENTPD6, AMPD2, CPT1C, SLC39A14, NISCH, PLA2G15, POR, IL1B, B3GNT3, TKT, ABCG1, MGLL, EPHA2, SLC27A4, PDXK, TNXB, MVK, BRAT1, ADRB2, ACACB, ADCY7, MAN2A2, HECTD4, RDH10, CYC1, VARS2, SLC25A23, ST3GAL1, LDLR, NTSR1, SLC25A25, APOBEC3C, ABCA2, OSBPL7, PTGES2, ATP8B1, PDE2A, GOT2, DHCR24, NMNAT2, SYNJ2, C…
GO:0071310~cellular response to organic substance	79	18.7204	0.000134412	POMT2, BCAR3, CYFIP1, NRP2, ITGB5, EHMT2, PLAT, AUP1, AKAP12, EEF2K, CDH1, CCRL2, DAG1, GRB10, CTSD, GIT1, TGM2, UNC13B, MAP2K3, SREBF1, ABCC1, CPT1A, IL4R, ACSL1, ITGA3, ITGA2, CAD, TRAF1, CSNK1E, RANGAP1, SLC39A14, ANO1, SLC7A5, MN1, POR, ADAM15, IL1B, TFF2, ITGA6, SLC29A1, ABCG1, SLC27A4, FBN2, KMT2D, TNXB, PDGFB, ATP1A3, MST1R, ADRB2, TNFRSF11A, ATP1A1, ADCY7, EGFR, BAG6, P2RY2, HSF1, FLNB, B…
GO:0009612~response to mechanical stimulus	16	3.79147	0.000138177	SUN1, JUP, ITGA2, PDE2A, SLC2A1, TNFRSF10A, TNFRSF11A, ATP1A1, F11R, PPL, EGFR, CLCN6, IL1B, DAG1, BAK1, MAP3K14
GO:0000904~cell morphogenesis involved in differentiation	32	7.58294	0.000174034	EPHB6, CAMK2B, CYFIP1, SEMA7A, NRP2, SEMA3B, CELSR2, SIPA1L3, SHH, EEF2K, RELN, CDH1, DAG1, PLXNA2, FLNA, FLNB, MBP, EPHB3, PLXNA3, EGR2, LAMB2, SEMA4B, WNT7A, NBEAL2, VEGFA, AXL, CCDC88C, MYH9, PLXNB2, P4HB, NGEF, EPHA2
GO:0045597~positive regulation of cell differentiation	42	9.95261	0.000178282	FBN2, CAMK2B, CYFIP1, SEMA7A, TNXB, F11R, EGFR, SHH, EEF2K, RELN, HSF1, RPS6KA1, DAG1, PLXNA2, FLNA, LRRC8A, ZBTB7B, PLXNA3, TGM2, EGR2, IL4R, JAG1, LAMB2, ITGA3, WNT7B, DDX56, LIF, SOX13, AP3D1, CSNK1E, VEGFA, SLC6A6, SLC7A5, POR, AXL, IL1B, SNAI1, PLXNB2, ITGA6, ADAM8, P4HB, ZNF335
GO:0007417~central nervous system development	42	9.95261	0.00018852	EPHB6, SEMA7A, NRP2, SLC2A1, ATP1A3, CELSR2, EGFR, NPAS2, BAG6, SHH, RELN, STK36, CDH1, DAG1, PLXNA2, FLNA, MBP, BAK1, GIT1, EPHB3, PLXNA3, SPTBN2, ABCA2, EGR2, SUN1, LAMB2, WNT7B, SEC16A, LIF, SOX13, WNT7A, SYNJ2, CSNK1E, TRAPPC9, FA2H, ATG16L1, AXL, IL1B, OGDH, CD9, PLXNB2, ZNF335
GO:0046486~glycerolipid metabolic process	21	4.9763	0.000195939	SREBF1, VAC14, CPT1A, PCYT2, TNXB, DGKD, ACSL1, DGKA, ABCA3, PDGFB, SYNJ2, EFR3B, SORL1, AGPAT3, PLA2G15, PTDSS2, PI4KA, PNPLA6, LDLR, MGLL, CDS2
GO:0051050~positive regulation of transport	38	9.00474	0.000198466	RAB3B, USP36, CEMIP, DGKD, PDGFB, TNFRSF11A, ADRB2, EGFR, SHH, EEF2K, RELN, CDH1, P2RY2, FLNA, LRRC8A, BAK1, KCNN4, NTSR1, UNC13B, IL4R, JUP, ACSL1, WFS1, ABCA3, ITGA2, SEC16A, TRPV3, SORL1, SYT7, VEGFA, ANO1, SLC7A5, EEPD1, SLC6A9, AXL, IL1B, ADAM8, ABCG1
GO:0007154~cell communication	172	40.7583	0.000201181	EPHB6, RAB3B, CHRM3, CYFIP1, DGKD, DGKA, EHMT2, PLAT, F11R, CELSR2, MILR1, ZFYVE28, CDH1, RPS6KA1, CCRL2, DAG1, GRB10, CAPN1, SAMD10, EPHB3, TGM2, UNC13B, MAP2K3, CPT1A, IL4R, ACSL1, USP2, SOX13, CSNK1E, GRIP2, NISCH, POR, ADAM15, PKP1, ADAM8, ABCG1, NGEF, EPHA2, SLC27A4, FBN2, KMT2D, SEMA7A, ARHGEF28, NOP2, PSEN2, PDGFB, SLC1A4, ITPR3, TNFRSF11A, MST1R, ADRB2, BAG6, STK36, PLXNA2, MBP, ZBTB7B, K…
GO:0032501~multicellular organismal process	198	46.9194	0.000208539	EPHB6, CYFIP1, EHMT2, SLC4A2, F11R, ENO2, RPS6KA1, DAG1, EPHB3, CPT1A, PAQR5, SOX13, CSNK1E, NISCH, POR, CLDN4, COL8A1, NGEF, EPHA2, SLC22A5, PDGFB, MST1R, EVPL, PPL, RDH10, KCNN4, ZBTB7B, ST3GAL1, NTSR1, SPTBN2, ABCA2, ACD, EGR2, JAG1, JUP, ABCA3, PDE2A, LIF, NBEAL2, FOSL2, CCDC88B, FA2H, FASN, OGDH, SNAI1, CDKN1A, NRP2, PEAR1, SIPA1L3, PTPRF, AKAP12, SHH, SH3PXD2A, CSRP1, GIT1, DUSP4, SREBF1, D…
GO:0040011~locomotion	66	15.6398	0.000213403	EPHB6, CYFIP1, NRP2, ITGB5, ITGB4, PLAT, F11R, CELSR2, PTPRF, SHH, CDH1, CCRL2, DAG1, GRB10, EPHB3, MAP2K3, ABCC1, SUN1, ITGA3, ITGA2, PLEKHG5, NISCH, CLDN4, ADAM15, IL1B, MYH9, ITGA6, ADAM8, CERS2, EPHA2, CAMK2B, SEMA7A, CEMIP, TNXB, BRAT1, SEMA3B, PDGFB, MST1R, TNFRSF11A, EGFR, TMEM201, RELN, PODXL, PLXNA2, FLNA, PLXNA3, EGR2, JAG1, JUP, SERPIND1, LAMB2, SEMA4B, WNT7A, CDC42BPB, SLC8B1, SORL1, …
GO:0007229~integrin-mediated signaling pathway	11	2.60664	0.000225085	SEMA7A, ITGB5, ADAM15, LAMB2, ITGA3, ITGB4, ITGA2, MYH9, FLNA, ADAM8, ITGA6
GO:0044093~positive regulation of molecular function	57	13.5071	0.000230356	EPHB6, BCAR3, CDKN1A, F11R, SIPA1L3, SHH, DAG1, FLOT2, CTSD, EPHB3, TGM2, MAP2K3, DUSP5, ACSL1, ITGA2, TRAF1, RANGAP1, POR, CLDN4, GPRC5A, IL1B, ITGA6, ADAM8, RAPGEF5, GPRC5C, NGEF, EPHA2, SLC27A4, VAC14, CEMIP, RGS16, PSEN2, PDGFB, MST1R, ADRB2, TNFRSF11A, CAMKK1, EGFR, RELN, STK36, HSF1, MBP, BAK1, RALGDS, NTSR1, ACD, JUP, WNT7B, TNFRSF10A, ARHGAP27, TRAPPC9, SORL1, VEGFA, SLC6A9, AXL, DNAJA3, …
GO:0042592~homeostatic process	64	15.1659	0.000246622	STEAP3, ALAS1, ZNF251, SLC2A1, SLC4A2, CCRL2, TNKS1BP1, GIT1, TGM2, UNC13B, AMPD2, SLC39A14, ANO1, CLDN4, IL1B, TFF2, ADAM8, TFF1, SLC29A1, ABCG1, CEMIP, SLC22A5, ATP1A3, ITPR3, ADRB2, TNFRSF11A, ATP1A1, ACACB, EGFR, MUC2, P2RY2, HECTD4, ATP6V0A2, FLNA, LRRC8A, BAK1, E2F4, KCNN4, SLC25A23, LDLR, NTSR1, ABCA2, SLC12A4, ACD, WFS1, ABCA3, WNT7B, GSR, AP3D1, TRPV3, SLC8B1, TPCN1, VEGFA, ASXL1, LETM1,…
GO:0043549~regulation of kinase activity	35	8.29384	0.000253346	EPHB6, VAC14, CDKN1A, CEMIP, TNXB, PDGFB, MST1R, TNFRSF11A, ADRB2, PTPRH, CAMKK1, EGFR, ZFYVE28, RELN, DAG1, CNPPD1, EPHB3, MAP2K3, DUSP4, DUSP5, ACSL1, WNT7B, TNFRSF10A, DUSP8, SORL1, VEGFA, GPRC5A, WDR81, AXL, DNAJA3, IL1B, ADAM8, PKN1, GPRC5C, EPHA2
GO:0007596~blood coagulation	15	3.5545	0.000253645	DGKD, SERPIND1, DGKA, ITGA2, PDGFB, PLAT, F11R, PEAR1, THBD, SHH, CSRP1, AXL, CD9, FLNA, MYH9
GO:0051674~localization of cell	60	14.218	0.000254602	NRP2, ITGB5, ITGB4, PLAT, F11R, CELSR2, PTPRF, SHH, CDH1, CCRL2, DAG1, GRB10, EPHB3, MAP2K3, ABCC1, SUN1, ITGA3, ITGA2, PLEKHG5, NISCH, CLDN4, ADAM15, IL1B, MYH9, ITGA6, ADAM8, CERS2, EPHA2, CAMK2B, SEMA7A, CEMIP, TNXB, BRAT1, SEMA3B, PDGFB, MST1R, TNFRSF11A, EGFR, TMEM201, RELN, PODXL, PLXNA2, FLNA, PLXNA3, JAG1, JUP, LAMB2, SEMA4B, WNT7A, CDC42BPB, SLC8B1, SORL1, VEGFA, DIAPH1, AXL, SNAI1, OGDH…
GO:0048870~cell motility	60	14.218	0.000254602	NRP2, ITGB5, ITGB4, PLAT, F11R, CELSR2, PTPRF, SHH, CDH1, CCRL2, DAG1, GRB10, EPHB3, MAP2K3, ABCC1, SUN1, ITGA3, ITGA2, PLEKHG5, NISCH, CLDN4, ADAM15, IL1B, MYH9, ITGA6, ADAM8, CERS2, EPHA2, CAMK2B, SEMA7A, CEMIP, TNXB, BRAT1, SEMA3B, PDGFB, MST1R, TNFRSF11A, EGFR, TMEM201, RELN, PODXL, PLXNA2, FLNA, PLXNA3, JAG1, JUP, LAMB2, SEMA4B, WNT7A, CDC42BPB, SLC8B1, SORL1, VEGFA, DIAPH1, AXL, SNAI1, OGDH…
GO:1901698~response to nitrogen compound	42	9.95261	0.000257356	BCAR3, CYFIP1, CHRM3, CDKN1A, EHMT2, SLC2A1, ATP1A3, PLAT, TNFRSF11A, ADRB2, EGFR, THBD, EEF2K, CDH1, P2RY2, HSF1, DAG1, GRB10, CYC1, ZBTB7B, CTSD, TGM2, SREBF1, ABCC1, CPT1A, EGR2, JAG1, JUP, ITGA2, PDE2A, CAD, GOT2, RANGAP1, SLC39A14, SORL1, DIAPH1, ANO1, SLC7A5, POR, IL1B, TFF1, SLC27A4
GO:0015893~drug transport	7	1.65877	0.000271616	ABCC3, ABCC1, SLC22A5, ATP8B1, ABCA3, SLC29A1, MFSD10
GO:0009966~regulation of signal transduction	93	22.0379	0.000292959	BCAR3, CYFIP1, SLC35F6, DGKD, FHL2, F11R, SIPA1L3, ZFYVE28, AKAP12, SHH, RPS6KA1, DAG1, GRB10, CAPN1, CTSD, GIT1, TGM2, DLGAP4, UNC13B, DUSP4, MAP2K3, PLEKHG4, DUSP5, ITGA3, PLEKHG5, USP2, SOX13, TRAF1, CSNK1E, DUSP8, SLC39A14, MN1, POR, INF2, GPRC5A, IL1B, ARHGEF4, ITGA6, ADAM8, NGEF, MGLL, EPHA2, SLC27A4, FBN2, KMT2D, SEMA7A, TNXB, SLC20A1, ARHGEF28, RGS16, NOP2, PDGFB, DENND3, MST1R, ADRB2, TN…
GO:0006935~chemotaxis	28	6.63507	0.000302243	EPHB6, CYFIP1, SEMA7A, NRP2, SEMA3B, PDGFB, TNFRSF11A, SHH, RELN, CCRL2, DAG1, PLXNA2, EPHB3, PLXNA3, ABCC1, EGR2, SERPIND1, LAMB2, SEMA4B, ITGA2, PLEKHG5, SLC8B1, VEGFA, IL1B, PLXNB2, ADAM8, PLP2, EPHA2
GO:0098602~single organism cell adhesion	31	7.34597	0.000319175	EPHB6, ITGB5, F11R, PEAR1, SLC7A1, SHH, CSRP1, CDH1, PODXL, FLNA, FLOT2, MBP, ZBTB7B, EPHB3, IL4R, JAG1, JUP, LAMB2, WNT7B, SOX13, AP3D1, VEGFA, ADAM19, CCDC88B, AXL, DNAJA3, IL1B, MYH9, CD9, ADAM8, P4HB
GO:0042330~taxis	28	6.63507	0.000343314	EPHB6, CYFIP1, SEMA7A, NRP2, SEMA3B, PDGFB, TNFRSF11A, SHH, RELN, CCRL2, DAG1, PLXNA2, EPHB3, PLXNA3, ABCC1, EGR2, SERPIND1, LAMB2, SEMA4B, ITGA2, PLEKHG5, SLC8B1, VEGFA, IL1B, PLXNB2, ADAM8, PLP2, EPHA2
GO:0007599~hemostasis	15	3.5545	0.000359271	DGKD, SERPIND1, DGKA, ITGA2, PDGFB, PLAT, F11R, PEAR1, THBD, SHH, CSRP1, AXL, CD9, FLNA, MYH9
GO:0030168~platelet activation	11	2.60664	0.00037151	THBD, DGKD, CSRP1, AXL, DGKA, PDGFB, CD9, MYH9, FLNA, F11R, PEAR1
GO:0010769~regulation of cell morphogenesis involved in differentiation	18	4.2654	0.000374526	CAMK2B, CYFIP1, SEMA7A, SEMA4B, SEMA3B, WNT7A, VEGFA, EEF2K, RELN, CDH1, PLXNA2, PLXNB2, FLNA, MBP, P4HB, NGEF, EPHB3, PLXNA3
GO:0050817~coagulation	15	3.5545	0.000374964	DGKD, SERPIND1, DGKA, ITGA2, PDGFB, PLAT, F11R, PEAR1, THBD, SHH, CSRP1, AXL, CD9, FLNA, MYH9
GO:0023052~signaling	169	40.0474	0.000412382	EPHB6, RAB3B, CHRM3, CYFIP1, DGKD, DGKA, PLAT, F11R, CELSR2, MILR1, ZFYVE28, CDH1, RPS6KA1, CCRL2, DAG1, GRB10, CAPN1, SAMD10, EPHB3, TGM2, UNC13B, MAP2K3, CPT1A, IL4R, ACSL1, USP2, SOX13, CSNK1E, GRIP2, NISCH, POR, ADAM15, PKP1, ADAM8, ABCG1, NGEF, EPHA2, SLC27A4, FBN2, KMT2D, SEMA7A, ARHGEF28, NOP2, PSEN2, PDGFB, SLC1A4, ITPR3, TNFRSF11A, MST1R, ADRB2, BAG6, STK36, PLXNA2, MBP, ZBTB7B, KCNN4, R…
GO:0034204~lipid translocation	6	1.4218	0.00041857	ABCA2, ABCC1, ATP8B1, ABCA3, KCNN4, ABCG1
GO:0045104~intermediate filament cytoskeleton organization	9	2.1327	0.000434186	KRT81, SHH, KRT80, KRT18, PKP1, KRT86, KRT75, PPL, EVPL
GO:0033674~positive regulation of kinase activity	26	6.16114	0.000434371	EPHB6, VAC14, CDKN1A, CEMIP, PDGFB, MST1R, TNFRSF11A, ADRB2, CAMKK1, EGFR, RELN, DAG1, EPHB3, MAP2K3, DUSP5, ACSL1, WNT7B, TNFRSF10A, VEGFA, GPRC5A, AXL, IL1B, ADAM8, PKN1, GPRC5C, EPHA2
GO:0071417~cellular response to organonitrogen compound	27	6.3981	0.000438137	BCAR3, CYFIP1, EHMT2, ATP1A3, ADRB2, EGFR, EEF2K, CDH1, P2RY2, HSF1, GRB10, ZBTB7B, CTSD, TGM2, SREBF1, ABCC1, JUP, PDE2A, RANGAP1, SLC39A14, SORL1, DIAPH1, ANO1, SLC7A5, POR, IL1B, SLC27A4
GO:0009410~response to xenobiotic stimulus	21	4.9763	0.000442885	ABCC3, BCAR3, SREBF1, ABCA2, ABCC1, CPT1A, ACSL1, ITGA3, EHMT2, ABCA3, ITGA2, ATP1A1, ENO2, ACACB, NPAS2, POR, CDH1, IL1B, CYP2S1, HSF1, BAK1
GO:0045103~intermediate filament-based process	9	2.1327	0.000468313	KRT81, SHH, KRT80, KRT18, PKP1, KRT86, KRT75, PPL, EVPL
GO:0042987~amyloid precursor protein catabolic process	8	1.89573	0.000474188	ADAM19, ABCA2, PSEN2, FLOT2, DHCR24, CSNK1E, SORL1, ABCG1
GO:0007420~brain development	33	7.81991	0.000481258	SEMA7A, NRP2, SLC2A1, ATP1A3, CELSR2, EGFR, BAG6, SHH, RELN, STK36, CDH1, PLXNA2, FLNA, MBP, BAK1, GIT1, EPHB3, PLXNA3, SPTBN2, EGR2, SUN1, WNT7B, SEC16A, WNT7A, SYNJ2, CSNK1E, TRAPPC9, ATG16L1, AXL, OGDH, CD9, PLXNB2, ZNF335
GO:0051240~positive regulation of multicellular organismal process	62	14.6919	0.00049036	CYFIP1, CHRM3, NRP2, PLAT, SLC4A2, F11R, AKAP12, THBD, SHH, EEF2K, DAG1, EPHB3, TGM2, MAP2K3, IL4R, ITGA3, ITGA2, DDX56, SOX13, CSNK1E, SLC7A5, POR, IL1B, ITGA6, ADAM8, FBN2, CAMK2B, SEMA7A, SLC22A5, TNXB, PDGFB, ADRB2, TNFRSF11A, ATP1A1, TOB2, ACACB, EGFR, NPAS2, RELN, P2RY2, HSF1, PLXNA2, FLNA, MBP, BRD9, ZBTB7B, PLXNA3, EGR2, JAG1, JUP, WNT7B, LIF, AP3D1, WNT7A, SORL1, VEGFA, CCDC88B, POLR3A, …
GO:0048812~neuron projection morphogenesis	27	6.3981	0.000516351	EPHB6, CAMK2B, CYFIP1, SEMA7A, NRP2, SEMA3B, CELSR2, EGFR, SHH, EEF2K, RELN, CDH1, DAG1, PLXNA2, MBP, EPHB3, PLXNA3, EGR2, LAMB2, SEMA4B, WNT7B, WNT7A, VEGFA, PLXNB2, ZNF335, NGEF, EPHA2
GO:0046903~secretion	38	9.00474	0.000521685	RAB3B, CHRM3, STEAP3, TNFAIP2, TNFRSF11A, CELSR2, EGFR, MILR1, P2RY2, LRRC8A, KCNN4, ZBTB7B, GIT1, NTSR1, UNC13B, SREBF1, CPT1A, IL4R, PTGES2, CAD, GOT2, LIF, WNT7A, SLC8B1, SORL1, SYT7, VEGFA, NISCH, ANO1, AXL, IL1B, EXOC3, MYH9, TFF2, PREB, ADAM8, SLC29A1, ABCG1
GO:0016310~phosphorylation	72	17.0616	0.000526459	EPHB6, BCAR3, CDKN1A, DGKD, DGKA, PTPRH, ENO2, ZFYVE28, AKAP12, EEF2K, RPS6KA1, DAG1, GRB10, TNKS1BP1, CNPPD1, GIT1, EPHB3, DUSP4, MAP2K3, DUSP5, ACSL1, CAD, TRAF1, CSNK1E, DUSP8, GPRC5A, WDR81, IL1B, ITGA6, ADAM8, GPRC5C, EPHA2, CAMK2B, VAC14, SEMA7A, PDXK, CEMIP, TNXB, MVK, BRAT1, PDGFB, MST1R, ADRB2, TNFRSF11A, CAMKK1, EGFR, RELN, STK36, HSF1, MBP, CYC1, BAK1, SLC25A23, ST3GAL1, WNT7B, TNK2, L…
GO:0007167~enzyme linked receptor protein signaling pathway	38	9.00474	0.000527348	EPHB6, FBN2, BCAR3, CYFIP1, NRP2, DGKD, TNXB, ITGB5, ARHGEF28, PDGFB, PLAT, MST1R, ADRB2, PTPRF, EGFR, ZFYVE28, SHH, GRB10, ZBTB7B, CTSD, SAMD10, GIT1, EPHB3, SREBF1, ITGA3, TNK2, LIF, SLC39A14, SORL1, IGF2R, VEGFA, GIGYF1, GPRC5A, AXL, IL1B, NGEF, EPHA2, SLC27A4
GO:0044283~small molecule biosynthetic process	25	5.92417	0.000528569	PDXK, MVK, ENO2, ACACB, FADS2, RDH10, NTSR1, SREBF1, ABCA2, OSBPL7, PTGES2, CAD, GOT2, DHCR24, COQ9, SLC39A14, FA2H, POR, PC, FASN, IL1B, SNAI1, DHCR7, MGLL, ABCG1
GO:0051049~regulation of transport	61	14.455	0.000536275	RAB3B, USP36, CYFIP1, SLC35F6, CHRM3, DGKD, SHH, EEF2K, CDH1, GRB10, CAPN1, GIT1, TGM2, UNC13B, SREBF1, CPT1A, IL4R, ACSL1, ITGA2, RANGAP1, ANO1, SLC7A5, IL1B, TFF2, PREB, ADAM8, ABCG1, CAMK2B, CEMIP, AHNAK, PDGFB, ADRB2, TNFRSF11A, ATP1A1, EGFR, RELN, P2RY2, FLNA, LRRC8A, BAK1, KCNN4, NTSR1, ABCA2, JUP, WFS1, ATP8B1, ABCA3, SEC16A, TNK2, LIF, WNT7A, TRPV3, SLC8B1, SORL1, SYT7, TPCN1, VEGFA, EEPD…
GO:0060284~regulation of cell development	38	9.00474	0.000539675	CAMK2B, CYFIP1, SEMA7A, SEMA3B, F11R, PTPRF, EGFR, SHH, EEF2K, RELN, CDH1, DAG1, PLXNA2, FLNA, MBP, EPHB3, PLXNA3, TGM2, ZHX2, EGR2, JAG1, ITGA3, SEMA4B, DDX56, LIF, WNT7A, CSNK1E, SORL1, VEGFA, SLC7A5, IL1B, BHLHE40, PLXNB2, ITGA6, P4HB, ZNF335, NGEF, CERS2
GO:0048646~anatomical structure formation involved in morphogenesis	44	10.4265	0.000542858	FBN2, NRP2, ITGB5, ITGB4, FLII, TNFAIP2, FHL2, SLC4A2, SHH, RELN, SH3PXD2A, CSRP1, PODXL, RDH10, DAG1, PLXNA2, FLNA, EPHB3, PLXNA3, TGM2, DUSP4, ABCA2, DUSP5, EGR2, IL4R, JAG1, JUP, ATP8B1, ITGA3, ITGA2, SHROOM3, WNT7A, NBEAL2, VEGFA, ADAM15, POLR1B, IL1B, SNAI1, COL8A1, MYH9, CD9, PLXNB2, ADAM8, EPHA2
GO:0043434~response to peptide hormone	22	5.21327	0.000545598	BCAR3, SREBF1, CYFIP1, EGR2, GOT2, CAD, SLC2A1, TNFRSF11A, RANGAP1, SLC39A14, SORL1, POR, EEF2K, IL1B, HSF1, DAG1, GRB10, TFF1, CYC1, ZBTB7B, CTSD, SLC27A4
GO:0045017~glycerolipid biosynthetic process	14	3.31754	0.000553714	SREBF1, VAC14, PCYT2, DGKD, ACSL1, DGKA, PDGFB, SYNJ2, AGPAT3, PLA2G15, PTDSS2, PI4KA, LDLR, CDS2
GO:0044700~single organism signaling	167	39.5735	0.000564017	EPHB6, RAB3B, CHRM3, CYFIP1, DGKD, DGKA, PLAT, F11R, CELSR2, MILR1, ZFYVE28, CDH1, RPS6KA1, CCRL2, DAG1, GRB10, CAPN1, SAMD10, EPHB3, TGM2, UNC13B, MAP2K3, CPT1A, IL4R, ACSL1, USP2, SOX13, CSNK1E, GRIP2, NISCH, POR, ADAM15, PKP1, ADAM8, ABCG1, NGEF, EPHA2, SLC27A4, FBN2, KMT2D, SEMA7A, ARHGEF28, NOP2, PSEN2, PDGFB, SLC1A4, ITPR3, TNFRSF11A, MST1R, ADRB2, BAG6, STK36, PLXNA2, MBP, ZBTB7B, KCNN4, R…
GO:0048771~tissue remodeling	13	3.08057	0.000571546	JAG1, LIF, TNFRSF11A, ADRB2, EGFR, SYT7, AXL, FLNA, ADAM8, BAK1, CAPN1, TGM2, EPHA2
GO:0060322~head development	34	8.05687	0.000606939	SEMA7A, NRP2, ANKRD11, SLC2A1, ATP1A3, CELSR2, EGFR, BAG6, SHH, RELN, STK36, CDH1, PLXNA2, FLNA, MBP, BAK1, GIT1, EPHB3, PLXNA3, SPTBN2, EGR2, SUN1, WNT7B, SEC16A, WNT7A, SYNJ2, CSNK1E, TRAPPC9, ATG16L1, AXL, OGDH, CD9, PLXNB2, ZNF335
GO:0006950~response to stress	115	27.2512	0.000625542	EPHB6, DGKD, DGKA, EHMT2, PLAT, AUP1, F11R, RPS6KA1, CCRL2, DAG1, TGM2, MAP2K3, IL4R, CSNK1E, CLDN4, ADAM15, SLPI, ADAM8, EPHA2, SEMA7A, SLC22A5, PSEN2, PDGFB, TNFRSF11A, MST1R, ADRB2, EVPL, PPL, NPAS2, BAG6, ZBTB7B, KCNN4, APOBEC3C, TRAP1, ACD, WFS1, SEC16A, TNK2, PDE2A, TRPV3, DHCR24, SYT7, CCDC88B, ATG16L1, FASN, CCDC88C, SNAI1, HYOU1, UBA1, MAP3K14, NFE2L1, POMT2, LGALS3BP, CDKN1A, ALAS1, ITG…
GO:1905952~regulation of lipid localization	13	3.08057	0.000652077	SREBF1, ABCA2, CPT1A, ACSL1, ABCA3, TNFRSF11A, ACACB, ASXL1, EEPD1, SHH, IL1B, ABCG1, NTSR1
GO:0090066~regulation of anatomical structure size	25	5.92417	0.000653058	RAB3B, CYFIP1, CHRM3, SEMA7A, FLII, SEMA3B, ADRB2, EGFR, CDH1, P2RY2, LRRC8A, E2F4, KCNN4, SPTAN1, PLXNA3, SPTBN2, SLC12A4, SEMA4B, WNT7B, WNT7A, GRIP2, VEGFA, ASXL1, CLCN6, CDC42EP3
GO:0046718~viral entry into host cell	11	2.60664	0.000695291	ITGB5, AXL, ITGA2, DAG1, P4HB, F11R, SLC7A1, LDLR, EGFR, EPHA2, TPCN1
GO:0060429~epithelium development	43	10.1896	0.000699858	KRT81, CDKN1A, KRT80, PDGFB, F11R, KRT86, EVPL, CELSR2, PPL, SIPA1L3, EGFR, SHH, PODXL, RDH10, DAG1, PLXNA2, FLNA, FLNB, E2F4, TGM2, CPT1A, JAG1, LAMB2, ITGA2, WNT7B, PDE2A, LIF, SHROOM3, WNT7A, KRT75, FOSL2, VEGFA, ASXL1, FA2H, FRAS1, KRT18, FASN, IL1B, CCDC88C, SNAI1, PLXNB2, NFE2L1, EPHA2
GO:0051604~protein maturation	18	4.2654	0.000732782	WFS1, PSEN2, PLAT, DHCR24, PCSK7, SORL1, ADAM19, TSPAN15, THBD, SHH, IL1B, MGAT4B, MYH9, ADAM8, BAK1, P4HB, ST3GAL1, ST6GALNAC4
GO:0030879~mammary gland development	11	2.60664	0.000733687	FASN, WNT7B, ITGA2, GOT2, CAD, CAPN1, TNFRSF11A, ZBTB7B, SLC29A1, EPHA2, VEGFA
GO:0051347~positive regulation of transferase activity	28	6.63507	0.000738524	EPHB6, VAC14, CDKN1A, CEMIP, PDGFB, MST1R, TNFRSF11A, ADRB2, CAMKK1, EGFR, RELN, DAG1, EPHB3, MAP2K3, DUSP5, ACD, ACSL1, WNT7B, TNFRSF10A, SORL1, VEGFA, GPRC5A, AXL, IL1B, ADAM8, PKN1, GPRC5C, EPHA2
GO:0006928~movement of cell or subcellular component	69	16.3507	0.000750178	EPHB6, CYFIP1, NRP2, ITGB5, ITGB4, PLAT, F11R, CELSR2, PTPRF, SHH, CDH1, CCRL2, DAG1, GRB10, FLOT2, EPHB3, MAP2K3, ABCC1, SUN1, ITGA3, ITGA2, PLEKHG5, STARD9, NISCH, CLDN4, ADAM15, IL1B, MYH9, ITGA6, ADAM8, CERS2, EPHA2, CAMK2B, SEMA7A, CEMIP, TNXB, BRAT1, SEMA3B, PDGFB, MST1R, TNFRSF11A, ATP1A1, EGFR, TMEM201, RELN, STK36, PODXL, PLXNA2, FLNA, PLXNA3, EGR2, JAG1, JUP, LAMB2, SEMA4B, AP3D1, WNT7A…
GO:0048858~cell projection morphogenesis	27	6.3981	0.000770378	EPHB6, CAMK2B, CYFIP1, SEMA7A, NRP2, SEMA3B, CELSR2, EGFR, SHH, EEF2K, RELN, CDH1, DAG1, PLXNA2, MBP, EPHB3, PLXNA3, EGR2, LAMB2, SEMA4B, WNT7B, WNT7A, VEGFA, PLXNB2, ZNF335, NGEF, EPHA2
GO:0051806~entry into cell of other organism involved in symbiotic interaction	11	2.60664	0.000815729	ITGB5, AXL, ITGA2, DAG1, P4HB, F11R, SLC7A1, LDLR, EGFR, EPHA2, TPCN1
GO:0030260~entry into host cell	11	2.60664	0.000815729	ITGB5, AXL, ITGA2, DAG1, P4HB, F11R, SLC7A1, LDLR, EGFR, EPHA2, TPCN1
GO:0044409~entry into host	11	2.60664	0.000815729	ITGB5, AXL, ITGA2, DAG1, P4HB, F11R, SLC7A1, LDLR, EGFR, EPHA2, TPCN1
GO:1902284~neuron projection extension involved in neuron projection guidance	6	1.4218	0.000834235	SEMA7A, NRP2, SEMA4B, SEMA3B, PLXNA3, VEGFA
GO:0048846~axon extension involved in axon guidance	6	1.4218	0.000834235	SEMA7A, NRP2, SEMA4B, SEMA3B, PLXNA3, VEGFA
GO:0051962~positive regulation of nervous system development	25	5.92417	0.000834254	CAMK2B, CYFIP1, SEMA7A, EGFR, SHH, EEF2K, RELN, DAG1, PLXNA2, FLNA, EPHB3, PLXNA3, TGM2, EGR2, ITGA3, DDX56, LIF, WNT7A, CSNK1E, VEGFA, SLC7A5, IL1B, PLXNB2, ITGA6, ZNF335
GO:0050769~positive regulation of neurogenesis	23	5.45024	0.000847151	CAMK2B, CYFIP1, SEMA7A, EGR2, ITGA3, DDX56, LIF, CSNK1E, EGFR, VEGFA, SLC7A5, SHH, EEF2K, RELN, IL1B, DAG1, PLXNA2, PLXNB2, FLNA, ITGA6, ZNF335, PLXNA3, TGM2
GO:0051828~entry into other organism involved in symbiotic interaction	11	2.60664	0.000859493	ITGB5, AXL, ITGA2, DAG1, P4HB, F11R, SLC7A1, LDLR, EGFR, EPHA2, TPCN1
GO:0051641~cellular localization	87	20.6161	0.000903132	RAB3B, USP36, CYFIP1, CDKN1A, CLTB, TNFAIP2, AUP1, F11R, MILR1, SEC61A1, SHH, CDH1, FLOT2, GIT1, UNC13B, SREBF1, SUN1, CPT1A, CLUH, IL4R, NUP210, ITGA3, CSNK1E, RANGAP1, GRIP2, ANO1, DDX39A, WDR81, IL1B, MYH9, EXOC3, PREB, SLC29A1, ABCG1, EPHA2, SLC27A4, CEMIP, BRAT1, PSEN2, DENND3, ITPR3, ADRB2, EGFR, NOL6, BAG6, ZDHHC18, TMEM201, RELN, PLXNA2, FLNA, BAK1, KCNN4, LDLR, NTSR1, CENPT, ABCA2, ACD, …
GO:0071496~cellular response to external stimulus	18	4.2654	0.000912235	SREBF1, CDKN1A, EHMT2, ITGA2, PDE2A, SLC2A1, TNFRSF10A, TNFRSF11A, ATP1A1, F11R, EGFR, MN1, SLC7A5, AXL, IL1B, DAG1, BAK1, MAP3K14
GO:0043270~positive regulation of ion transport	17	4.02844	0.000949824	RAB3B, CEMIP, ACSL1, WFS1, ABCA3, PDGFB, TRPV3, TNFRSF11A, ADRB2, SLC7A5, RELN, SLC6A9, IL1B, FLNA, BAK1, KCNN4, NTSR1
GO:0030334~regulation of cell migration	38	9.00474	0.000951477	CAMK2B, SEMA7A, NRP2, CEMIP, TNXB, SEMA3B, PDGFB, EGFR, SHH, RELN, CDH1, PODXL, DAG1, PLXNA2, FLNA, PLXNA3, MAP2K3, JAG1, JUP, ITGA3, SEMA4B, ITGA2, WNT7A, SLC8B1, SORL1, VEGFA, NISCH, DIAPH1, CLDN4, ADAM15, IL1B, SNAI1, CD9, PLXNB2, ITGA6, ADAM8, CERS2, EPHA2
GO:0019058~viral life cycle	20	4.73934	0.000983418	APOBEC3C, ITGB5, ITGA2, DDX56, F11R, SLC7A1, EGFR, TPCN1, PC, SLPI, AXL, ATG16L1, MGAT4B, DAG1, PI4KA, P4HB, LDLR, ST3GAL1, ST6GALNAC4, EPHA2
GO:0019220~regulation of phosphate metabolic process	58	13.7441	0.00105011	EPHB6, BCAR3, CDKN1A, SH2D4A, PTPRH, ZFYVE28, AKAP12, EEF2K, DAG1, GRB10, TNKS1BP1, CNPPD1, GIT1, EPHB3, DUSP4, MAP2K3, DUSP5, ACSL1, ITGA2, TRAF1, DUSP8, GPRC5A, WDR81, IL1B, ITGA6, ADAM8, GPRC5C, EPHA2, VAC14, SEMA7A, CEMIP, TNXB, BRAT1, PDGFB, MST1R, ADRB2, TNFRSF11A, CAMKK1, EGFR, RELN, HSF1, BAK1, SLC25A23, LDLR, NTSR1, ABCA2, WNT7B, TNK2, LIF, WNT7A, TNFRSF10A, SORL1, VEGFA, AXL, DNAJA3, CC…
GO:0032868~response to insulin	16	3.79147	0.00105554	BCAR3, SREBF1, CYFIP1, EGR2, GOT2, CAD, SLC2A1, TNFRSF11A, SLC39A14, SORL1, EEF2K, IL1B, GRB10, ZBTB7B, CTSD, SLC27A4
GO:0072348~sulfur compound transport	7	1.65877	0.0010834	SLC5A6, SLC6A6, SLC7A5, ABCC1, SLC26A11, LRRC8A, SLC1A4
GO:0098661~inorganic anion transmembrane transport	10	2.36967	0.00110375	CLCN7, SLC5A6, CLCN6, ANO1, SLC12A4, CLDN4, SLC20A1, SLC26A11, LRRC8A, SLC1A4
GO:0051174~regulation of phosphorus metabolic process	58	13.7441	0.00110757	EPHB6, BCAR3, CDKN1A, SH2D4A, PTPRH, ZFYVE28, AKAP12, EEF2K, DAG1, GRB10, TNKS1BP1, CNPPD1, GIT1, EPHB3, DUSP4, MAP2K3, DUSP5, ACSL1, ITGA2, TRAF1, DUSP8, GPRC5A, WDR81, IL1B, ITGA6, ADAM8, GPRC5C, EPHA2, VAC14, SEMA7A, CEMIP, TNXB, BRAT1, PDGFB, MST1R, ADRB2, TNFRSF11A, CAMKK1, EGFR, RELN, HSF1, BAK1, SLC25A23, LDLR, NTSR1, ABCA2, WNT7B, TNK2, LIF, WNT7A, TNFRSF10A, SORL1, VEGFA, AXL, DNAJA3, CC…
GO:0006812~cation transport	43	10.1896	0.00110942	RAB3B, CAMK2B, STEAP3, CEMIP, SLC22A5, TMEM63A, AHNAK, SLC20A1, PSEN2, PDGFB, ATP1A3, SLC1A4, ITPR3, ADRB2, ATP1A1, SLC7A1, SEC61A1, RELN, ATP6V0A2, FLNA, CYC1, BAK1, CAPN1, KCNN4, SLC25A23, SLC25A25, NTSR1, SLC12A4, WFS1, NIPA1, TRPV3, SLC8B1, SLC39A14, TPCN1, LETM1, SLC5A6, DIAPH1, ANO1, SLC6A6, SLC7A5, SLC25A37, SLC7A6, SLC6A9
GO:0032990~cell part morphogenesis	27	6.3981	0.00113129	EPHB6, CAMK2B, CYFIP1, SEMA7A, NRP2, SEMA3B, CELSR2, EGFR, SHH, EEF2K, RELN, CDH1, DAG1, PLXNA2, MBP, EPHB3, PLXNA3, EGR2, LAMB2, SEMA4B, WNT7B, WNT7A, VEGFA, PLXNB2, ZNF335, NGEF, EPHA2
GO:0051960~regulation of nervous system development	36	8.53081	0.00113944	CAMK2B, CYFIP1, SEMA7A, SEMA3B, PTPRF, EGFR, SHH, EEF2K, RELN, CDH1, DAG1, PLXNA2, FLNA, MBP, EPHB3, PLXNA3, TGM2, ZHX2, EGR2, JAG1, ITGA3, SEMA4B, DDX56, LIF, WNT7A, CSNK1E, SORL1, VEGFA, SLC7A5, IL1B, BHLHE40, PLXNB2, ITGA6, ZNF335, NGEF, CERS2
GO:0045595~regulation of cell differentiation	61	14.455	0.00116179	CYFIP1, F11R, PTPRF, SHH, EEF2K, CDH1, RPS6KA1, DAG1, FLOT2, EPHB3, TGM2, ZHX2, IL4R, ITGA3, DDX56, SOX13, CSNK1E, SLC7A5, POR, IL1B, ITGA6, ADAM8, ABCG1, NGEF, CERS2, FBN2, CAMK2B, SEMA7A, TNXB, SEMA3B, PDGFB, TOB2, EGFR, RELN, HSF1, PLXNA2, FLNA, MBP, BRD9, LRRC8A, ZBTB7B, PLXNA3, EGR2, JAG1, LAMB2, SEMA4B, WNT7B, LIF, AP3D1, WNT7A, SORL1, VEGFA, ASXL1, SLC6A6, AXL, BHLHE40, SNAI1, PLXNB2, P4HB…
GO:0016337~single organismal cell-cell adhesion	27	6.3981	0.00116527	EPHB6, ITGB5, F11R, PEAR1, SLC7A1, SHH, CSRP1, CDH1, PODXL, FLNA, FLOT2, MBP, ZBTB7B, IL4R, JAG1, JUP, WNT7B, SOX13, AP3D1, VEGFA, ADAM19, CCDC88B, DNAJA3, IL1B, MYH9, CD9, ADAM8
GO:0006639~acylglycerol metabolic process	10	2.36967	0.00116659	PLA2G15, SREBF1, CPT1A, TNXB, DGKD, ACSL1, DGKA, SORL1, LDLR, MGLL
GO:0061005~cell differentiation involved in kidney development	7	1.65877	0.00118589	ASXL1, SHH, JAG1, LAMB2, PODXL, PDGFB, LIF
GO:0032941~secretion by tissue	6	1.4218	0.00119858	ANO1, CHRM3, P2RY2, KCNN4, CELSR2, EGFR
GO:0072006~nephron development	11	2.60664	0.00122294	ASXL1, SEC61A1, SHH, JAG1, LAMB2, ITGA3, PODXL, WNT7B, PDGFB, LIF, VEGFA
GO:0006638~neutral lipid metabolic process	10	2.36967	0.00123228	PLA2G15, SREBF1, CPT1A, TNXB, DGKD, ACSL1, DGKA, SORL1, LDLR, MGLL
GO:0010720~positive regulation of cell development	25	5.92417	0.00123574	CAMK2B, CYFIP1, SEMA7A, F11R, EGFR, SHH, EEF2K, RELN, DAG1, PLXNA2, FLNA, PLXNA3, TGM2, EGR2, ITGA3, DDX56, LIF, CSNK1E, VEGFA, SLC7A5, IL1B, PLXNB2, ITGA6, P4HB, ZNF335
GO:0042325~regulation of phosphorylation	53	12.5592	0.0013085	EPHB6, BCAR3, CDKN1A, PTPRH, ZFYVE28, AKAP12, EEF2K, DAG1, GRB10, TNKS1BP1, CNPPD1, GIT1, EPHB3, DUSP4, MAP2K3, DUSP5, ACSL1, TRAF1, DUSP8, GPRC5A, WDR81, IL1B, ITGA6, ADAM8, GPRC5C, EPHA2, VAC14, SEMA7A, CEMIP, TNXB, BRAT1, PDGFB, MST1R, ADRB2, TNFRSF11A, CAMKK1, EGFR, RELN, HSF1, BAK1, SLC25A23, WNT7B, TNK2, LIF, WNT7A, TNFRSF10A, SORL1, VEGFA, AXL, DNAJA3, CCDC88C, PLXNB2, PKN1
GO:0051094~positive regulation of developmental process	51	12.0853	0.00131995	CYFIP1, SLC4A2, F11R, SHH, EEF2K, RPS6KA1, DAG1, EPHB3, TGM2, IL4R, ITGA3, DDX56, SOX13, CSNK1E, SLC7A5, POR, IL1B, ITGA6, ADAM8, FBN2, CAMK2B, SEMA7A, TNXB, PDGFB, ADRB2, ACACB, EGFR, RELN, HSF1, PLXNA2, FLNA, BRD9, LRRC8A, ZBTB7B, PLXNA3, EGR2, JAG1, JUP, LAMB2, WNT7B, LIF, AP3D1, WNT7A, SORL1, VEGFA, SLC6A6, AXL, SNAI1, PLXNB2, P4HB, ZNF335
GO:0043412~macromolecule modification	113	26.7773	0.00136142	EPHB6, CHRM3, GALNT18, EHMT2, PLAT, HR, JADE2, GALNT10, LOXL1, ZFYVE28, RPS6KA1, DAG1, GRB10, EPHB3, TGM2, MAP2K3, ACSL1, PUS1, USP2, CSNK1E, FTSJ1, POR, ADAM8, EPHA2, KLHL18, KMT2D, SEMA7A, CEMIP, KMT2B, NOP2, PDGFB, UBR4, TNFRSF11A, MST1R, ADRB2, EVPL, BAG6, MAN2A2, STK36, MBP, LONRF3, ZBTB7B, ST3GAL1, LONRF2, APOBEC3C, ABCA2, EGR2, WFS1, TNK2, LIF, TNFRSF10A, ATG16L1, CCDC88C, PLXNB2, UBA1, MA…
GO:0007565~female pregnancy	13	3.08057	0.00140373	ITGB4, ITGA3, ITGA2, GOT2, CAD, LIF, SLC2A1, ADCY7, VEGFA, THBD, CLDN4, IL1B, POLR1B
GO:2000145~regulation of cell motility	39	9.24171	0.00140408	CAMK2B, SEMA7A, NRP2, CEMIP, TNXB, SEMA3B, PDGFB, EGFR, SHH, RELN, CDH1, PODXL, DAG1, PLXNA2, FLNA, PLXNA3, MAP2K3, JAG1, JUP, ITGA3, SEMA4B, ITGA2, WNT7A, SLC8B1, SORL1, VEGFA, NISCH, DIAPH1, CLDN4, ADAM15, IL1B, SNAI1, CD9, PLXNB2, ITGA6, ADAM8, PKN1, CERS2, EPHA2
GO:0006464~cellular protein modification process	108	25.5924	0.0014074	EPHB6, CHRM3, GALNT18, EHMT2, PLAT, HR, JADE2, GALNT10, LOXL1, ZFYVE28, RPS6KA1, DAG1, GRB10, EPHB3, TGM2, MAP2K3, ACSL1, USP2, CSNK1E, POR, ADAM8, EPHA2, KLHL18, KMT2D, SEMA7A, CEMIP, KMT2B, PDGFB, UBR4, TNFRSF11A, MST1R, ADRB2, EVPL, BAG6, MAN2A2, STK36, MBP, LONRF3, ZBTB7B, ST3GAL1, LONRF2, ABCA2, EGR2, WFS1, TNK2, LIF, TNFRSF10A, ATG16L1, CCDC88C, PLXNB2, UBA1, MAP3K14, POMT2, BCAR3, USP36, C…
GO:0036211~protein modification process	108	25.5924	0.0014074	EPHB6, CHRM3, GALNT18, EHMT2, PLAT, HR, JADE2, GALNT10, LOXL1, ZFYVE28, RPS6KA1, DAG1, GRB10, EPHB3, TGM2, MAP2K3, ACSL1, USP2, CSNK1E, POR, ADAM8, EPHA2, KLHL18, KMT2D, SEMA7A, CEMIP, KMT2B, PDGFB, UBR4, TNFRSF11A, MST1R, ADRB2, EVPL, BAG6, MAN2A2, STK36, MBP, LONRF3, ZBTB7B, ST3GAL1, LONRF2, ABCA2, EGR2, WFS1, TNK2, LIF, TNFRSF10A, ATG16L1, CCDC88C, PLXNB2, UBA1, MAP3K14, POMT2, BCAR3, USP36, C…
GO:0072659~protein localization to plasma membrane	15	3.5545	0.00141955	RAB3B, JUP, ITGA3, SEC16A, F11R, EFR3B, SORL1, EGFR, GRIP2, TSPAN15, KRT18, CDH1, FLNA, FLOT2, EPHA2
GO:0046890~regulation of lipid biosynthetic process	12	2.8436	0.00150234	SREBF1, ABCA2, POR, RDH10, IL1B, ABCA3, PDGFB, SNAI1, DHCR7, ATP1A1, LDLR, ABCG1
GO:0048667~cell morphogenesis involved in neuron differentiation	24	5.6872	0.00152046	EPHB6, CAMK2B, CYFIP1, SEMA7A, EGR2, NRP2, LAMB2, SEMA4B, SEMA3B, WNT7A, CELSR2, VEGFA, SHH, EEF2K, RELN, CDH1, DAG1, PLXNA2, PLXNB2, MBP, NGEF, EPHB3, PLXNA3, EPHA2
GO:0008360~regulation of cell shape	11	2.60664	0.00155252	DIAPH1, CYFIP1, CDC42EP3, PLXNA2, DAG1, SHROOM3, MYH9, PLXNB2, F11R, PLXNA3, VEGFA
GO:0072015~glomerular visceral epithelial cell development	4	0.947867	0.00156508	ASXL1, JAG1, LAMB2, PODXL
GO:0097305~response to alcohol	13	3.08057	0.00157922	SREBF1, ABCA2, OSBPL7, CPT1A, JUP, EHMT2, GOT2, TNFRSF11A, ADCY7, CDH1, DAG1, BAK1, NFE2L1
GO:0051338~regulation of transferase activity	36	8.53081	0.00158842	EPHB6, VAC14, CDKN1A, CEMIP, TNXB, PDGFB, MST1R, TNFRSF11A, ADRB2, PTPRH, CAMKK1, EGFR, ZFYVE28, RELN, DAG1, CNPPD1, EPHB3, MAP2K3, DUSP4, DUSP5, ACD, ACSL1, WNT7B, TNFRSF10A, DUSP8, SORL1, VEGFA, GPRC5A, WDR81, AXL, DNAJA3, IL1B, ADAM8, PKN1, GPRC5C, EPHA2
GO:0048585~negative regulation of response to stimulus	56	13.2701	0.00172044	SLC35F6, CDKN1A, DGKD, FHL2, PLAT, ZFYVE28, THBD, SHH, RPS6KA1, DAG1, GRB10, DUSP4, MAP2K3, DUSP5, IL4R, ITGA3, SOX13, CSNK1E, DUSP8, GPRC5A, IL1B, ITGA6, CERS2, EPHA2, SLC27A4, OTUB2, FBN2, SEMA7A, MVK, RGS16, SEMA3B, PDGFB, ADRB2, ADCY7, EGFR, ZDHHC18, HSF1, BAK1, ZBTB7B, PLXNA3, TRAP1, WFS1, SEMA4B, PDE2A, LIF, SYVN1, SORL1, ASXL1, TSPAN15, SLC6A9, AXL, DNAJA3, CCDC88C, SNAI1, CD9, HYOU1
GO:0019218~regulation of steroid metabolic process	9	2.1327	0.00174845	SREBF1, ABCA2, POR, IL1B, SNAI1, DHCR7, ATP1A1, LDLR, ABCG1
GO:0042327~positive regulation of phosphorylation	39	9.24171	0.00175204	EPHB6, BCAR3, VAC14, CDKN1A, SEMA7A, CEMIP, TNXB, BRAT1, PDGFB, MST1R, TNFRSF11A, ADRB2, CAMKK1, EGFR, AKAP12, RELN, HSF1, DAG1, GRB10, TNKS1BP1, EPHB3, MAP2K3, DUSP5, ACSL1, TNK2, WNT7B, LIF, WNT7A, TNFRSF10A, TRAF1, VEGFA, GPRC5A, AXL, IL1B, ITGA6, ADAM8, PKN1, GPRC5C, EPHA2
GO:0061564~axon development	22	5.21327	0.00176738	EPHB6, CYFIP1, SEMA7A, EGR2, NRP2, LAMB2, SEMA4B, SEMA3B, WNT7A, VEGFA, SHH, RELN, CDH1, DAG1, PLXNA2, PLXNB2, FLNA, MBP, EPHB3, CERS2, PLXNA3, EPHA2
GO:0022008~neurogenesis	54	12.7962	0.00183396	EPHB6, CYFIP1, NRP2, ITGB4, EHMT2, CELSR2, PTPRF, SHH, EEF2K, CDH1, DAG1, GIT1, EPHB3, TGM2, SUN1, ZHX2, ITGA3, DDX56, SOX13, CSNK1E, SLC7A5, IL1B, ITGA6, NGEF, CERS2, EPHA2, CAMK2B, SEMA7A, SEMA3B, EGFR, RELN, PLXNA2, FLNA, MBP, PLXNA3, ABCA2, EGR2, JAG1, LAMB2, ATP8B1, SEMA4B, WNT7B, LIF, WNT7A, TRAPPC9, SORL1, VEGFA, FA2H, AXL, BHLHE40, OGDH, CD9, PLXNB2, ZNF335
GO:0050770~regulation of axonogenesis	12	2.8436	0.00185061	CYFIP1, SEMA7A, CDH1, SEMA4B, SEMA3B, PLXNA2, WNT7A, PLXNB2, MBP, EPHB3, PLXNA3, VEGFA
GO:0007009~plasma membrane organization	19	4.50237	0.0018828	RAB3B, JUP, AHNAK, ITGA3, SEC16A, F11R, EFR3B, SORL1, EGFR, SYT7, GRIP2, TSPAN15, FA2H, KRT18, CDH1, FLNA, FLOT2, MYH9, EPHA2
GO:0031100~animal organ regeneration	8	1.89573	0.00188582	SLC7A5, CDKN1A, CPT1A, AXL, CAD, BAK1, EGFR, IGF2R
GO:0010770~positive regulation of cell morphogenesis involved in differentiation	11	2.60664	0.00195077	CAMK2B, CYFIP1, SEMA7A, EEF2K, RELN, PLXNA2, PLXNB2, FLNA, P4HB, PLXNA3, VEGFA
GO:0097061~dendritic spine organization	7	1.65877	0.00196505	CAMK2B, EEF2K, RELN, ITGA3, WNT7A, NGEF, EPHB3
GO:0071705~nitrogen compound transport	66	15.6398	0.00199328	SLC48A1, RAB3B, USP36, CDKN1A, STEAP3, DGKD, CLTB, AUP1, SEC61A1, SHH, CDH1, UNC13B, SREBF1, ABCC1, CPT1A, NUP210, RANGAP1, GRIP2, SLC5A6, NISCH, ANO1, SLC7A5, SLC7A6, DDX39A, SLCO4A1, IL1B, MYH9, EXOC3, PREB, ADAM8, SLC29A1, ABCG1, CEMIP, SLC22A5, AP5Z1, SLC1A4, SLC7A1, EGFR, NOL6, BAG6, ZDHHC18, HSF1, FLNA, LRRC8A, KCNN4, SLC25A23, NTSR1, SLC25A25, ABCA2, ACD, EGR2, JUP, SEC16A, SYVN1, AP3D1, T…
GO:0072310~glomerular epithelial cell development	4	0.947867	0.00200433	ASXL1, JAG1, LAMB2, PODXL
GO:0031589~cell-substrate adhesion	18	4.2654	0.00200817	TNXB, JAG1, ITGB5, JUP, LAMB2, ITGB4, ITGA3, ITGA2, PDGFB, VEGFA, ADAM15, AXL, DAG1, FLNA, COL8A1, ITGA6, P4HB, EPHB3
GO:0061028~establishment of endothelial barrier	6	1.4218	0.00204979	FASN, WNT7B, PDE2A, WNT7A, F11R, VEGFA
GO:0060997~dendritic spine morphogenesis	6	1.4218	0.00204979	CAMK2B, EEF2K, RELN, WNT7A, NGEF, EPHB3
GO:0048864~stem cell development	8	1.89573	0.0021489	SEMA7A, SHH, NRP2, JAG1, RDH10, SEMA4B, SEMA3B, WNT7A
GO:0008361~regulation of cell size	12	2.8436	0.00216433	CLCN6, CYFIP1, SLC12A4, SEMA7A, CDH1, SEMA4B, SEMA3B, LRRC8A, E2F4, KCNN4, PLXNA3, VEGFA
GO:0045859~regulation of protein kinase activity	29	6.87204	0.00221688	CDKN1A, CEMIP, TNXB, PDGFB, MST1R, TNFRSF11A, ADRB2, PTPRH, CAMKK1, EGFR, ZFYVE28, RELN, DAG1, CNPPD1, MAP2K3, DUSP4, DUSP5, ACSL1, WNT7B, TNFRSF10A, DUSP8, SORL1, VEGFA, GPRC5A, DNAJA3, IL1B, ADAM8, PKN1, GPRC5C
GO:0006509~membrane protein ectodomain proteolysis	6	1.4218	0.00226232	ADAM19, IL1B, PSEN2, DAG1, MYH9, ADAM8
GO:0001974~blood vessel remodeling	6	1.4218	0.00226232	JAG1, AXL, LIF, FLNA, BAK1, TGM2
GO:1902932~positive regulation of alcohol biosynthetic process	5	1.18483	0.00227575	SREBF1, POR, IL1B, ABCG1, NTSR1
GO:0007165~signal transduction	153	36.2559	0.00228368	EPHB6, CHRM3, CYFIP1, DGKD, DGKA, PLAT, F11R, CELSR2, MILR1, ZFYVE28, RPS6KA1, CCRL2, DAG1, GRB10, CAPN1, SAMD10, EPHB3, TGM2, UNC13B, MAP2K3, IL4R, ACSL1, USP2, SOX13, CSNK1E, GRIP2, NISCH, POR, ADAM15, PKP1, ADAM8, NGEF, EPHA2, SLC27A4, FBN2, KMT2D, SEMA7A, ARHGEF28, NOP2, PSEN2, PDGFB, ITPR3, TNFRSF11A, MST1R, ADRB2, BAG6, STK36, PLXNA2, MBP, ZBTB7B, KCNN4, RALGDS, NTSR1, PLXNA3, ABCA2, TRAP1,…
GO:0051128~regulation of cellular component organization	81	19.1943	0.00229168	USP36, CYFIP1, SLC35F6, CDKN1A, DGKD, EHMT2, JADE2, F11R, ENO2, PTPRF, EEF2K, CDH1, RPS6KA1, DAG1, SPTAN1, COLGALT1, GIT1, EPHB3, TGM2, UNC13B, SREBF1, IL4R, ITGA3, ITGA2, DDX56, SHROOM3, CLDN4, MED24, INF2, ADAM15, IL1B, CDC42EP3, MYH9, PREB, ITGA6, ABCG1, NGEF, CERS2, EPHA2, OTUB2, CAMK2B, SEMA7A, TNXB, AHNAK, FLII, BRAT1, SEMA3B, PDGFB, ADRB2, EGFR, RELN, NCLN, PODXL, HSF1, HAS3, PLXNA2, FLNA,…
GO:0030324~lung development	12	2.8436	0.00235528	ASXL1, BAG6, SREBF1, SHH, ITGA3, RDH10, ABCA3, WNT7B, DAG1, LIF, EGFR, VEGFA
GO:1902930~regulation of alcohol biosynthetic process	6	1.4218	0.00249043	SREBF1, POR, IL1B, DHCR7, ABCG1, NTSR1
GO:0019216~regulation of lipid metabolic process	18	4.2654	0.00249246	SREBF1, ABCA2, CPT1A, ABCA3, PDGFB, ADRB2, ATP1A1, ACACB, SORL1, POR, WDR81, RDH10, IL1B, SNAI1, DHCR7, LDLR, ABCG1, CERS2
GO:0007409~axonogenesis	20	4.73934	0.00249754	EPHB6, CYFIP1, SEMA7A, EGR2, NRP2, LAMB2, SEMA4B, SEMA3B, WNT7A, VEGFA, SHH, RELN, CDH1, DAG1, PLXNA2, PLXNB2, MBP, EPHB3, PLXNA3, EPHA2
GO:0030213~hyaluronan biosynthetic process	4	0.947867	0.00251304	CEMIP, IL1B, PDGFB, HAS3
GO:0040012~regulation of locomotion	40	9.47867	0.00253487	CAMK2B, SEMA7A, NRP2, CEMIP, TNXB, SEMA3B, PDGFB, EGFR, SHH, RELN, CDH1, PODXL, DAG1, PLXNA2, FLNA, PLXNA3, MAP2K3, JAG1, JUP, ITGA3, SEMA4B, ITGA2, WNT7A, SLC8B1, SORL1, VEGFA, NISCH, DIAPH1, CLDN4, PC, ADAM15, IL1B, SNAI1, CD9, PLXNB2, ITGA6, ADAM8, PKN1, CERS2, EPHA2
GO:0051649~establishment of localization in cell	66	15.6398	0.00262381	RAB3B, USP36, CYFIP1, CDKN1A, CLTB, AUP1, MILR1, SEC61A1, SHH, CDH1, FLOT2, GIT1, UNC13B, SREBF1, SUN1, CPT1A, IL4R, NUP210, RANGAP1, ANO1, DDX39A, WDR81, IL1B, MYH9, EXOC3, PREB, SLC29A1, ABCG1, SLC27A4, CEMIP, DENND3, ITPR3, ADRB2, NOL6, BAG6, ZDHHC18, TMEM201, FLNA, BAK1, KCNN4, LDLR, NTSR1, ABCA2, ACD, EGR2, JUP, SEC16A, SYVN1, AP3D1, WNT7A, TRPV3, TIMM44, SYNJ2, TRAPPC9, SLC8B1, SORL1, SYT7,…
GO:0048518~positive regulation of biological process	163	38.6256	0.00266215	EPHB6, RAB3B, CHRM3, CYFIP1, DGKD, PLAT, SLC4A2, F11R, CDH1, ZMIZ2, RPS6KA1, DAG1, GRB10, CAPN1, EPHB3, TGM2, UNC13B, MAP2K3, CPT1A, IL4R, ACSL1, USP2, SOX13, CSNK1E, ADAM19, POR, CLDN4, COL8A1, PKP1, ADAM8, ABCG1, EPHA2, SLC27A4, FBN2, KLHL18, KMT2D, SEMA7A, CEMIP, SLC22A5, KMT2B, NOP2, PDGFB, ITPR3, TNFRSF11A, MST1R, ADRB2, ACACB, NPAS2, BAG6, STK36, PODXL, RDH10, PLXNA2, MBP, ZBTB7B, KCNN4, NT…
GO:1901571~fatty acid derivative transport	7	1.65877	0.00266651	ABCC3, ABCC1, SLCO4A1, IL1B, TNFRSF11A, ABCC10, NTSR1
GO:0071715~icosanoid transport	7	1.65877	0.00266651	ABCC3, ABCC1, SLCO4A1, IL1B, TNFRSF11A, ABCC10, NTSR1
GO:0032535~regulation of cellular component size	19	4.50237	0.00269889	RAB3B, CYFIP1, SLC12A4, SEMA7A, FLII, SEMA4B, WNT7B, SEMA3B, WNT7A, VEGFA, CLCN6, CDH1, CDC42EP3, LRRC8A, E2F4, KCNN4, SPTAN1, PLXNA3, SPTBN2
GO:0010562~positive regulation of phosphorus metabolic process	41	9.71564	0.00271187	EPHB6, BCAR3, VAC14, CDKN1A, SEMA7A, CEMIP, TNXB, BRAT1, PDGFB, MST1R, TNFRSF11A, ADRB2, CAMKK1, EGFR, AKAP12, RELN, HSF1, DAG1, GRB10, TNKS1BP1, NTSR1, EPHB3, MAP2K3, DUSP5, ACSL1, TNK2, ITGA2, WNT7B, LIF, WNT7A, TNFRSF10A, TRAF1, VEGFA, GPRC5A, AXL, IL1B, ITGA6, ADAM8, PKN1, GPRC5C, EPHA2
GO:0045937~positive regulation of phosphate metabolic process	41	9.71564	0.00271187	EPHB6, BCAR3, VAC14, CDKN1A, SEMA7A, CEMIP, TNXB, BRAT1, PDGFB, MST1R, TNFRSF11A, ADRB2, CAMKK1, EGFR, AKAP12, RELN, HSF1, DAG1, GRB10, TNKS1BP1, NTSR1, EPHB3, MAP2K3, DUSP5, ACSL1, TNK2, ITGA2, WNT7B, LIF, WNT7A, TNFRSF10A, TRAF1, VEGFA, GPRC5A, AXL, IL1B, ITGA6, ADAM8, PKN1, GPRC5C, EPHA2
GO:0048675~axon extension	9	2.1327	0.00271797	CYFIP1, SEMA7A, NRP2, CDH1, LAMB2, SEMA4B, SEMA3B, PLXNA3, VEGFA
GO:0021782~glial cell development	9	2.1327	0.00271797	FA2H, ABCA2, SHH, LAMB2, ITGB4, IL1B, DAG1, CD9, EGFR
GO:0022407~regulation of cell-cell adhesion	22	5.21327	0.00273927	EPHB6, IL4R, JAG1, SOX13, AP3D1, F11R, CELSR2, SLC7A1, VEGFA, CCDC88B, ADAM19, SHH, CDH1, PODXL, IL1B, DNAJA3, CD9, FLOT2, ADAM8, MBP, ZBTB7B, EPHB3
GO:0030323~respiratory tube development	12	2.8436	0.00274753	ASXL1, BAG6, SREBF1, SHH, ITGA3, RDH10, ABCA3, WNT7B, DAG1, LIF, EGFR, VEGFA
GO:0042982~amyloid precursor protein metabolic process	8	1.89573	0.00275939	ADAM19, ABCA2, PSEN2, FLOT2, DHCR24, CSNK1E, SORL1, ABCG1
GO:0030900~forebrain development	19	4.50237	0.00282336	SEMA7A, SUN1, NRP2, WNT7B, SLC2A1, WNT7A, ATP1A3, TRAPPC9, EGFR, SHH, RELN, CDH1, AXL, ATG16L1, OGDH, FLNA, ZNF335, EPHB3, PLXNA3
GO:0043405~regulation of MAP kinase activity	15	3.5545	0.00288903	MAP2K3, DUSP4, DUSP5, TNXB, WNT7B, PDGFB, MST1R, TNFRSF11A, DUSP8, SORL1, EGFR, VEGFA, IL1B, ADAM8, PKN1
GO:1901653~cellular response to peptide	18	4.2654	0.00298032	BCAR3, SREBF1, CYFIP1, ABCC1, ATP1A3, ADRB2, RANGAP1, SLC39A14, SORL1, ANO1, POR, EEF2K, IL1B, HSF1, GRB10, ZBTB7B, CTSD, SLC27A4
GO:1901699~cellular response to nitrogen compound	28	6.63507	0.00298625	BCAR3, CYFIP1, CHRM3, EHMT2, ATP1A3, ADRB2, EGFR, EEF2K, CDH1, P2RY2, HSF1, GRB10, ZBTB7B, CTSD, TGM2, SREBF1, ABCC1, JUP, PDE2A, RANGAP1, SLC39A14, SORL1, DIAPH1, ANO1, SLC7A5, POR, IL1B, SLC27A4
GO:0016485~protein processing	15	3.5545	0.00299182	PSEN2, PLAT, DHCR24, PCSK7, ADAM19, THBD, SHH, IL1B, MGAT4B, MYH9, ADAM8, BAK1, P4HB, ST3GAL1, ST6GALNAC4
GO:0035850~epithelial cell differentiation involved in kidney development	6	1.4218	0.00299604	ASXL1, JAG1, LAMB2, PODXL, PDGFB, LIF
GO:1902531~regulation of intracellular signal transduction	58	13.7441	0.00303462	BCAR3, DGKD, FHL2, F11R, SIPA1L3, AKAP12, RPS6KA1, DAG1, GIT1, TGM2, DUSP4, MAP2K3, PLEKHG4, DUSP5, ITGA3, PLEKHG5, USP2, TRAF1, DUSP8, INF2, IL1B, ARHGEF4, ADAM8, NGEF, EPHA2, SEMA7A, TNXB, SLC20A1, ARHGEF28, NOP2, PDGFB, DENND3, MST1R, ADRB2, TNFRSF11A, EGFR, RELN, HSF1, FLNA, TRAP1, WFS1, WNT7B, PDE2A, LIF, SYVN1, WNT7A, TNFRSF10A, ARHGAP27, ARHGAP26, SORL1, VEGFA, AXL, DNAJA3, SNAI1, HYOU1, P…
GO:0051270~regulation of cellular component movement	40	9.47867	0.00306964	CAMK2B, SEMA7A, NRP2, CEMIP, TNXB, SEMA3B, PDGFB, ATP1A1, EGFR, SHH, RELN, CDH1, PODXL, DAG1, PLXNA2, FLNA, PLXNA3, MAP2K3, JAG1, JUP, ITGA3, SEMA4B, ITGA2, WNT7A, SLC8B1, SORL1, VEGFA, NISCH, DIAPH1, CLDN4, ADAM15, IL1B, SNAI1, CD9, PLXNB2, ITGA6, ADAM8, PKN1, CERS2, EPHA2
GO:0048871~multicellular organismal homeostasis	18	4.2654	0.00312772	SLC22A5, WFS1, ABCA3, SLC2A1, AMPD2, TNFRSF11A, ADRB2, ACACB, EGFR, VEGFA, FA2H, CLDN4, MUC2, IL1B, TFF2, ADAM8, TFF1, NTSR1
GO:0034330~cell junction organization	15	3.5545	0.00325816	JUP, ITGB4, ITGA2, F11R, VEGFA, CLDN4, CDH1, IL1B, SNAI1, CD9, PKP1, FLNA, CDH24, ITGA6, EPHA2
GO:0010975~regulation of neuron projection development	22	5.21327	0.00339811	CAMK2B, CYFIP1, SEMA7A, ITGA3, SEMA4B, DDX56, SEMA3B, WNT7A, PTPRF, VEGFA, EEF2K, RELN, CDH1, PLXNA2, PLXNB2, FLNA, ITGA6, MBP, NGEF, EPHB3, CERS2, PLXNA3
GO:0070838~divalent metal ion transport	21	4.9763	0.00344783	CEMIP, AHNAK, WFS1, PSEN2, PDGFB, NIPA1, TRPV3, ITPR3, SLC8B1, SLC39A14, TPCN1, LETM1, DIAPH1, SEC61A1, SLC6A9, FLNA, BAK1, KCNN4, SLC25A23, SLC25A25, NTSR1
GO:0008286~insulin receptor signaling pathway	9	2.1327	0.00350966	BCAR3, SREBF1, IL1B, GRB10, ZBTB7B, CTSD, SLC39A14, SORL1, SLC27A4
GO:0015748~organophosphate ester transport	9	2.1327	0.00350966	ABCC1, ATP8B1, ABCA3, ESYT1, KCNN4, SLC25A23, LDLR, ABCG1, SLC25A25
GO:0001885~endothelial cell development	7	1.65877	0.00354077	IL1B, FASN, WNT7B, PDE2A, WNT7A, F11R, VEGFA
GO:0042063~gliogenesis	16	3.79147	0.00356583	ABCA2, EGR2, SUN1, LAMB2, ITGB4, LIF, SOX13, EGFR, SLC7A5, FA2H, SHH, RELN, IL1B, DAG1, CD9, CERS2
GO:0001655~urogenital system development	17	4.02844	0.00360348	ACD, JAG1, LAMB2, WFS1, ITGA3, WNT7B, PDGFB, LIF, VEGFA, ASXL1, BAG6, SEC61A1, SHH, FRAS1, PODXL, RDH10, EPHB3
GO:0010001~glial cell differentiation	13	3.08057	0.00361748	ABCA2, EGR2, LAMB2, ITGB4, LIF, SOX13, EGFR, FA2H, SHH, RELN, IL1B, DAG1, CD9
GO:0018193~peptidyl-amino acid modification	42	9.95261	0.00363942	EPHB6, BCAR3, CAMK2B, KMT2D, CEMIP, EHMT2, KMT2B, PDGFB, MST1R, JADE2, EGFR, LOXL1, ZFYVE28, BAG6, SHH, ZDHHC18, RELN, HSF1, RPS6KA1, TNKS1BP1, BAK1, EPHB3, TGM2, MAP2K3, GALNT6, EGR2, PRMT7, TNK2, CAD, LIF, CDC42BPB, CSNK1E, RANGAP1, VEGFA, POR, GPRC5A, AXL, IL1B, PKN1, P4HB, ZNF335, EPHA2
GO:0032091~negative regulation of protein binding	8	1.89573	0.00370007	CDKN1A, SLPI, ADAM15, PDGFB, ADRB2, CSNK1E, SORL1, PTPRF
GO:1902285~semaphorin-plexin signaling pathway involved in neuron projection guidance	4	0.947867	0.00375229	NRP2, PLXNA2, PLXNB2, PLXNA3
GO:0072511~divalent inorganic cation transport	21	4.9763	0.00379561	CEMIP, AHNAK, WFS1, PSEN2, PDGFB, NIPA1, TRPV3, ITPR3, SLC8B1, SLC39A14, TPCN1, LETM1, DIAPH1, SEC61A1, SLC6A9, FLNA, BAK1, KCNN4, SLC25A23, SLC25A25, NTSR1
GO:0001101~response to acid chemical	18	4.2654	0.00379695	SREBF1, CPT1A, ALAS1, ACSL1, WNT7B, ITGA2, PDGFB, ATP1A3, PLAT, EGFR, IGF2R, VEGFA, ASXL1, SLC7A5, HSF1, CD9, MBP, LDLR
GO:0043393~regulation of protein binding	12	2.8436	0.00383277	EPHB6, CDKN1A, PRMT7, SLPI, ADAM15, ITGA2, HSF1, PDGFB, ADRB2, CSNK1E, SORL1, PTPRF
GO:0048762~mesenchymal cell differentiation	13	3.08057	0.00386016	SEMA7A, NRP2, TNXB, JAG1, SEMA4B, SEMA3B, SHH, ADAM15, RDH10, IL1B, POLR1B, SNAI1, FLNA
GO:0051235~maintenance of location	16	3.79147	0.00389907	FBN2, SUN1, CEMIP, PSEN2, ITPR3, ACACB, SLC8B1, SORL1, TPCN1, ASXL1, LETM1, DIAPH1, IL1B, FLNA, ABCG1, NTSR1
GO:0006644~phospholipid metabolic process	19	4.50237	0.00400697	VAC14, ABCA2, PCYT2, DGKD, MVK, DGKA, ABCA3, PDGFB, SYNJ2, EFR3B, AGPAT3, PLA2G15, PTDSS2, WDR81, PI4KA, PNPLA6, LDLR, PLBD2, CDS2
GO:0010647~positive regulation of cell communication	56	13.2701	0.00404918	BCAR3, RAB3B, CYFIP1, DGKD, F11R, AKAP12, SHH, GRB10, CTSD, TGM2, UNC13B, MAP2K3, DUSP5, ITGA2, PLEKHG5, TRAF1, CSNK1E, SLC39A14, ANO1, MN1, POR, IL1B, ADAM8, ABCG1, KMT2D, SEMA7A, TNXB, SLC20A1, PDGFB, ITPR3, MST1R, ADRB2, TNFRSF11A, EGFR, RELN, STK36, HSF1, FLNA, LRRC8A, BAK1, KCNN4, ZBTB7B, NTSR1, JAG1, JUP, LAMB2, WNT7B, LIF, WNT7A, TNFRSF10A, SORL1, VEGFA, ASXL1, AXL, PKN1, MAP3K14
GO:0021885~forebrain cell migration	7	1.65877	0.00405022	SUN1, NRP2, RELN, AXL, OGDH, EGFR, PLXNA3
GO:0044706~multi-multicellular organism process	13	3.08057	0.0041275	ITGB4, ITGA3, ITGA2, GOT2, CAD, LIF, SLC2A1, ADCY7, VEGFA, THBD, CLDN4, IL1B, POLR1B
GO:0006884~cell volume homeostasis	5	1.18483	0.00420217	CLCN6, SLC12A4, LRRC8A, E2F4, KCNN4
GO:0089718~amino acid import across plasma membrane	5	1.18483	0.00420217	SLC6A6, SLC7A5, SLC1A4, SLC7A1, NTSR1
GO:0044745~amino acid transmembrane import	5	1.18483	0.00420217	SLC6A6, SLC7A5, SLC1A4, SLC7A1, NTSR1
GO:0048013~ephrin receptor signaling pathway	6	1.4218	0.00422297	EPHB6, ARHGEF28, GIT1, NGEF, EPHB3, EPHA2
GO:0045860~positive regulation of protein kinase activity	21	4.9763	0.00428029	MAP2K3, DUSP5, CDKN1A, CEMIP, ACSL1, WNT7B, PDGFB, TNFRSF10A, MST1R, TNFRSF11A, ADRB2, EGFR, CAMKK1, VEGFA, RELN, GPRC5A, IL1B, DAG1, ADAM8, PKN1, GPRC5C
GO:0045664~regulation of neuron differentiation	26	6.16114	0.00436597	CAMK2B, CYFIP1, SEMA7A, SEMA3B, PTPRF, SHH, EEF2K, RELN, CDH1, PLXNA2, FLNA, MBP, EPHB3, PLXNA3, ZHX2, JAG1, ITGA3, SEMA4B, DDX56, WNT7A, CSNK1E, VEGFA, PLXNB2, ITGA6, NGEF, CERS2
GO:0050768~negative regulation of neurogenesis	15	3.5545	0.00439565	SEMA7A, ZHX2, JAG1, SEMA4B, SEMA3B, WNT7A, SORL1, SHH, CDH1, IL1B, FLNA, MBP, NGEF, CERS2, PLXNA3
GO:0030001~metal ion transport	32	7.58294	0.00442734	CAMK2B, STEAP3, CEMIP, SLC22A5, AHNAK, SLC20A1, PSEN2, PDGFB, ATP1A3, ITPR3, ADRB2, ATP1A1, SEC61A1, FLNA, BAK1, KCNN4, SLC25A23, SLC25A25, NTSR1, SLC12A4, WFS1, NIPA1, TRPV3, SLC8B1, SLC39A14, TPCN1, LETM1, SLC5A6, DIAPH1, SLC6A6, SLC25A37, SLC6A9
GO:0071900~regulation of protein serine/threonine kinase activity	21	4.9763	0.00443201	MAP2K3, DUSP4, DUSP5, CDKN1A, CEMIP, TNXB, ACSL1, WNT7B, PDGFB, TNFRSF10A, MST1R, TNFRSF11A, ADRB2, DUSP8, SORL1, EGFR, VEGFA, IL1B, ADAM8, PKN1, CNPPD1
GO:0023056~positive regulation of signaling	56	13.2701	0.00444326	BCAR3, RAB3B, CYFIP1, DGKD, F11R, AKAP12, SHH, GRB10, CTSD, TGM2, UNC13B, MAP2K3, DUSP5, ITGA2, PLEKHG5, TRAF1, CSNK1E, SLC39A14, ANO1, MN1, POR, IL1B, ADAM8, ABCG1, KMT2D, SEMA7A, TNXB, SLC20A1, PDGFB, ITPR3, MST1R, ADRB2, TNFRSF11A, EGFR, RELN, STK36, HSF1, FLNA, LRRC8A, BAK1, KCNN4, ZBTB7B, NTSR1, JAG1, JUP, LAMB2, WNT7B, LIF, WNT7A, TNFRSF10A, SORL1, VEGFA, ASXL1, AXL, PKN1, MAP3K14
GO:0019725~cellular homeostasis	34	8.05687	0.00457103	CEMIP, ATP1A3, ITPR3, ATP1A1, SLC4A2, P2RY2, CCRL2, ATP6V0A2, FLNA, LRRC8A, BAK1, E2F4, KCNN4, SLC25A23, GIT1, NTSR1, TGM2, UNC13B, ABCA2, SLC12A4, WFS1, GSR, TRPV3, SLC8B1, SLC39A14, TPCN1, LETM1, DIAPH1, ANO1, CLCN6, SLC29A1, CYB561, ABCG1, NFE2L1
GO:1902653~secondary alcohol biosynthetic process	6	1.4218	0.00457841	SREBF1, POR, MVK, DHCR24, DHCR7, ABCG1
GO:0006695~cholesterol biosynthetic process	6	1.4218	0.00457841	SREBF1, POR, MVK, DHCR24, DHCR7, ABCG1
GO:0033627~cell adhesion mediated by integrin	7	1.65877	0.00461195	ITGB5, ITGA3, ITGB4, PODXL, ITGA2, LIF, ITGA6
GO:0048841~regulation of axon extension involved in axon guidance	5	1.18483	0.00468785	SEMA7A, SEMA4B, SEMA3B, PLXNA3, VEGFA
GO:0019637~organophosphate metabolic process	38	9.00474	0.00473199	VAC14, PDXK, DGKD, MVK, DGKA, PDGFB, ADRB2, ENO2, ADCY7, AGPAT3, PTDSS2, CYC1, SLC25A23, LDLR, SLC25A25, GIT1, NTSR1, ABCA2, PCYT2, ABCA3, PDE2A, CAD, ENTPD6, AMPD2, NMNAT2, SYNJ2, COQ9, EFR3B, PLA2G15, PC, WDR81, OGDH, PI4KA, PNPLA6, TKT, PLBD2, EPHA2, CDS2
GO:0051222~positive regulation of protein transport	16	3.79147	0.00482124	UNC13B, USP36, CEMIP, JUP, SEC16A, SORL1, EGFR, ANO1, SHH, CDH1, IL1B, FLNA, ADAM8, LRRC8A, KCNN4, ABCG1
GO:0006898~receptor-mediated endocytosis	15	3.5545	0.00486615	ABCA2, DGKD, TNK2, AP3D1, CLTB, SYNJ2, ADRB2, ARHGAP27, SORL1, EGFR, SYT7, IGF2R, VEGFA, CD9, LDLR
GO:0031344~regulation of cell projection organization	27	6.3981	0.00488763	CAMK2B, CYFIP1, SEMA7A, SEMA3B, PTPRF, EEF2K, RELN, CDH1, PODXL, PLXNA2, FLNA, MBP, EPHB3, PLXNA3, ATP8B1, ITGA3, SEMA4B, ITGA2, DDX56, WNT7A, VEGFA, CDC42EP3, PLXNB2, ITGA6, NGEF, CERS2, EPHA2
GO:0046165~alcohol biosynthetic process	9	2.1327	0.00490517	SREBF1, ABCA2, POR, MVK, IL1B, DHCR24, DHCR7, ABCG1, NTSR1
GO:0001704~formation of primary germ layer	9	2.1327	0.00490517	DUSP4, DUSP5, ITGB5, ITGA3, ITGB4, ITGA2, SNAI1, COL8A1, EPHA2
GO:1902580~single-organism cellular localization	36	8.53081	0.0049515	RAB3B, CYFIP1, CDKN1A, PSEN2, F11R, EGFR, NOL6, MILR1, SHH, TMEM201, CDH1, FLNA, FLOT2, LDLR, GIT1, UNC13B, ABCA2, CPT1A, SUN1, IL4R, JUP, ITGA3, SEC16A, AP3D1, WNT7A, TIMM44, SYNJ2, EFR3B, SORL1, GRIP2, SYT7, TSPAN15, KRT18, SEC24C, ABCG1, EPHA2
GO:0051701~interaction with host	12	2.8436	0.00505015	PC, ITGB5, AXL, ITGA2, DAG1, P4HB, F11R, SLC7A1, LDLR, EGFR, EPHA2, TPCN1
GO:0016192~vesicle-mediated transport	49	11.6114	0.00505828	RAB3B, LGALS3BP, CYFIP1, DGKD, CLTB, TNFAIP2, PEAR1, MILR1, SHH, EEF2K, GIT1, TGM2, UNC13B, IL4R, ITGA2, CSNK1E, GRIP2, WDR81, IL1B, MYH9, EXOC3, PREB, AP5Z1, MST1R, ADRB2, EGFR, FLNA, LDLR, SPTBN2, ABCA2, SEC16A, TNK2, AP3D1, WNT7A, SYNJ2, ARHGAP27, TRAPPC9, SORL1, IGF2R, SYT7, TPCN1, VEGFA, KRT18, AXL, CD9, HYOU1, P4HB, LRP10, SEC24C
GO:0009887~animal organ morphogenesis	36	8.53081	0.005112	FBN2, BCAR3, NRP2, ITGB4, ANKRD11, FHL2, SLC4A2, CELSR2, EGFR, SHH, RDH10, RPS6KA1, DAG1, FLNA, BAK1, E2F4, CAPN1, TGM2, ZHX2, JAG1, LAMB2, ITGA2, WNT7B, LIF, WNT7A, VEGFA, ASXL1, SLC7A5, POR, FRAS1, ADAM15, SNAI1, COL8A1, ITGA6, ZNF335, EPHA2
GO:0031175~neuron projection development	33	7.81991	0.00512748	EPHB6, CAMK2B, CYFIP1, SEMA7A, NRP2, SEMA3B, CELSR2, PTPRF, EGFR, SHH, EEF2K, RELN, CDH1, DAG1, PLXNA2, FLNA, MBP, EPHB3, PLXNA3, EGR2, LAMB2, ITGA3, SEMA4B, WNT7B, DDX56, WNT7A, VEGFA, PLXNB2, ITGA6, ZNF335, NGEF, CERS2, EPHA2
GO:0050810~regulation of steroid biosynthetic process	7	1.65877	0.00522904	SREBF1, POR, IL1B, SNAI1, DHCR7, ATP1A1, ABCG1
GO:0007264~small GTPase mediated signal transduction	19	4.50237	0.00523158	BCAR3, CYFIP1, CDKN1A, ITGA3, PLEKHG5, TNK2, ARHGEF28, DENND3, DHCR24, F11R, NISCH, RELN, DNAJA3, CCDC88C, CDC42EP3, RAPGEF5, RALGDS, GIT1, TGM2
GO:0050821~protein stabilization	12	2.8436	0.00523334	BAG6, USP36, NCLN, WDR81, WFS1, DNAJA3, SEC16A, USP2, SYVN1, FLNA, FLOT2, USP19
GO:0051056~regulation of small GTPase mediated signal transduction	15	3.5545	0.00528382	PLEKHG4, ITGA3, PLEKHG5, ARHGEF28, DENND3, ARHGAP27, F11R, ARHGAP26, SIPA1L3, INF2, RELN, ARHGEF4, GIT1, NGEF, TGM2
GO:0097306~cellular response to alcohol	6	1.4218	0.00535225	OSBPL7, JUP, CDH1, DAG1, ADCY7, NFE2L1
GO:0072657~protein localization to membrane	23	5.45024	0.00548133	RAB3B, CEMIP, JUP, ITGA3, SEC16A, AP3D1, F11R, EFR3B, SORL1, EGFR, GRIP2, BAG6, TSPAN15, ANO1, SEC61A1, ZDHHC18, KRT18, RELN, CDH1, DNAJA3, FLNA, FLOT2, EPHA2
GO:0034329~cell junction assembly	13	3.08057	0.0054946	JUP, ITGB4, ITGA2, F11R, VEGFA, CLDN4, IL1B, SNAI1, CD9, PKP1, CDH24, ITGA6, EPHA2
GO:0006024~glycosaminoglycan biosynthetic process	7	1.65877	0.0055593	CEMIP, CHPF2, IL1B, PDGFB, B3GNT3, HAS3, ST3GAL1
GO:0001822~kidney development	15	3.5545	0.00557687	JAG1, LAMB2, WFS1, ITGA3, WNT7B, PDGFB, LIF, VEGFA, ASXL1, BAG6, SEC61A1, SHH, FRAS1, PODXL, RDH10
GO:0051282~regulation of sequestering of calcium ion	9	2.1327	0.00561905	LETM1, DIAPH1, CEMIP, FLNA, ITPR3, SLC25A23, SLC8B1, NTSR1, TPCN1
GO:0010811~positive regulation of cell-substrate adhesion	9	2.1327	0.00561905	JUP, ITGA3, PDGFB, DAG1, FLNA, COL8A1, ITGA6, P4HB, VEGFA
GO:0022600~digestive system process	8	1.89573	0.00568801	CHRM3, MUC2, SLC22A5, TFF2, TFF1, F11R, KCNN4, LDLR
GO:0043090~amino acid import	6	1.4218	0.0057719	SLC6A6, SLC7A5, SLC6A9, SLC1A4, SLC7A1, NTSR1
GO:0015914~phospholipid transport	7	1.65877	0.00590456	ABCC1, ATP8B1, ABCA3, ESYT1, KCNN4, LDLR, ABCG1
GO:0060541~respiratory system development	12	2.8436	0.00616943	ASXL1, BAG6, SREBF1, SHH, ITGA3, RDH10, ABCA3, WNT7B, DAG1, LIF, EGFR, VEGFA
GO:1903034~regulation of response to wounding	12	2.8436	0.00616943	THBD, CDKN1A, CLDN4, AHNAK, PDGFB, CD9, MYH9, FLNA, PLAT, F11R, PTPRF, CERS2
GO:0030216~keratinocyte differentiation	10	2.36967	0.00617256	KRT81, KRT80, JAG1, FLNB, KRT86, KRT75, PPL, EVPL, EPHA2, FOSL2
GO:0043087~regulation of GTPase activity	17	4.02844	0.00624898	BCAR3, RGS16, ARHGAP27, F11R, RANGAP1, SIPA1L3, PLXNA2, PLXNB2, ITGA6, RAPGEF5, RALGDS, NGEF, EPHB3, PLXNA3, TGM2, EPHA2, SLC27A4
GO:0009991~response to extracellular stimulus	22	5.21327	0.00626628	SREBF1, CDKN1A, CPT1A, ACSL1, EHMT2, ITGA2, CAD, SLC2A1, TNFRSF11A, ADRB2, ACACB, SORL1, EGFR, MN1, SLC7A5, POR, KRT18, AXL, HSF1, LDLR, SLC25A25, SLC27A4
GO:0098655~cation transmembrane transport	33	7.81991	0.00635559	CEMIP, SLC22A5, TMEM63A, AHNAK, SLC20A1, ATP1A3, SLC1A4, ITPR3, ADRB2, ATP1A1, SLC7A1, SEC61A1, RELN, ATP6V0A2, FLNA, CYC1, CAPN1, KCNN4, SLC25A23, SLC25A25, NTSR1, SLC12A4, NIPA1, TRPV3, SLC8B1, SLC39A14, TPCN1, LETM1, DIAPH1, ANO1, SLC6A6, SLC7A5, SLC6A9
GO:0098660~inorganic ion transmembrane transport	32	7.58294	0.0065806	CEMIP, AHNAK, SLC20A1, ATP1A3, SLC1A4, ITPR3, ATP1A1, SEC61A1, ATP6V0A2, FLNA, LRRC8A, SLC26A11, CYC1, KCNN4, SLC25A23, SLC25A25, NTSR1, SLC12A4, NIPA1, TRPV3, SLC8B1, SLC39A14, TPCN1, CLCN7, LETM1, SLC5A6, DIAPH1, ANO1, SLC6A6, CLCN6, CLDN4, SLC6A9
GO:0014032~neural crest cell development	7	1.65877	0.00664157	SEMA7A, SHH, NRP2, JAG1, RDH10, SEMA4B, SEMA3B
GO:0021537~telencephalon development	14	3.31754	0.00670849	SEMA7A, SUN1, NRP2, SLC2A1, ATP1A3, TRAPPC9, EGFR, SHH, RELN, ATG16L1, OGDH, FLNA, EPHB3, PLXNA3
GO:0071495~cellular response to endogenous stimulus	43	10.1896	0.00678083	FBN2, BCAR3, KMT2D, CYFIP1, TNXB, ITGB5, EHMT2, PDGFB, ATP1A3, PLAT, ADRB2, ATP1A1, EGFR, EEF2K, CDH1, P2RY2, HSF1, GRB10, ZBTB7B, CTSD, LDLR, TGM2, SREBF1, ABCC1, JUP, ACSL1, ITGA3, PDE2A, CAD, WNT7A, CSNK1E, RANGAP1, SLC39A14, SORL1, DIAPH1, ANO1, SLC7A5, POR, IL1B, CD9, PKN1, ABCG1, SLC27A4
GO:0048666~neuron development	37	8.76777	0.00681337	EPHB6, CAMK2B, CYFIP1, SEMA7A, NRP2, SEMA3B, CELSR2, PTPRF, EGFR, SHH, EEF2K, RELN, CDH1, DAG1, PLXNA2, FLNA, MBP, GIT1, EPHB3, PLXNA3, EGR2, LAMB2, ATP8B1, ITGA3, SEMA4B, WNT7B, DDX56, LIF, WNT7A, VEGFA, OGDH, PLXNB2, ITGA6, ZNF335, NGEF, CERS2, EPHA2
GO:0022409~positive regulation of cell-cell adhesion	15	3.5545	0.00688036	EPHB6, IL4R, SOX13, AP3D1, F11R, SLC7A1, CCDC88B, ADAM19, SHH, PODXL, IL1B, DNAJA3, FLOT2, ADAM8, ZBTB7B
GO:0008104~protein localization	73	17.2986	0.00692777	RAB3B, USP36, CDKN1A, STEAP3, DGKD, CLTB, TNFAIP2, AUP1, F11R, SEC61A1, SHH, CDH1, FLOT2, TNS4, CTSD, UNC13B, SREBF1, SUN1, CPT1A, NUP210, ITGA3, ITGA2, SHROOM3, CSNK1E, RANGAP1, GRIP2, ANO1, DDX39A, IL1B, MYH9, EXOC3, PREB, ADAM8, ABCG1, EPHA2, FBN2, CEMIP, AP5Z1, EGFR, NOL6, BAG6, ZDHHC18, TMEM201, RELN, FLNA, LRRC8A, KCNN4, CENPT, ABCA2, ACD, EGR2, JUP, ATP8B1, SEC16A, LIF, SYVN1, AP3D1, WNT7A…
GO:0002521~leukocyte differentiation	23	5.45024	0.00699765	IL4R, PDE2A, LIF, SOX13, AP3D1, SYVN1, TNFRSF11A, TOB2, VEGFA, SHH, SH3PXD2A, AXL, IL1B, DNAJA3, FASN, HSF1, MYH9, ADAM8, LRRC8A, BAK1, ZBTB7B, ST3GAL1, EPHA2
GO:0006855~drug transmembrane transport	5	1.18483	0.0070056	ABCC3, SLC22A5, ATP8B1, ABCA3, SLC29A1
GO:0001775~cell activation	38	9.00474	0.00706069	EPHB6, CDKN1A, DGKD, DGKA, PDGFB, PLAT, F11R, PEAR1, SLC7A1, EGFR, BAG6, MILR1, AKAP12, THBD, SHH, CSRP1, RPS6KA1, FLNA, FLOT2, LRRC8A, BAK1, ZBTB7B, ST3GAL1, LDLR, IL4R, SYVN1, SOX13, AP3D1, WNT7A, CCDC88B, AXL, DNAJA3, IL1B, MYH9, CD9, ADAM8, PKN1, ZNF335
GO:0072001~renal system development	15	3.5545	0.00706117	JAG1, LAMB2, WFS1, ITGA3, WNT7B, PDGFB, LIF, VEGFA, ASXL1, BAG6, SEC61A1, SHH, FRAS1, PODXL, RDH10
GO:0031667~response to nutrient levels	21	4.9763	0.00713037	SREBF1, CDKN1A, CPT1A, ACSL1, EHMT2, ITGA2, CAD, SLC2A1, TNFRSF11A, ADRB2, ACACB, SORL1, EGFR, MN1, SLC7A5, POR, KRT18, HSF1, LDLR, SLC25A25, SLC27A4
GO:0010721~negative regulation of cell development	16	3.79147	0.00720356	SEMA7A, ZHX2, JAG1, SEMA4B, SEMA3B, WNT7A, SORL1, VEGFA, SHH, CDH1, IL1B, FLNA, MBP, NGEF, CERS2, PLXNA3
GO:0006897~endocytosis	28	6.63507	0.00727925	LGALS3BP, DGKD, CLTB, MST1R, ADRB2, PEAR1, EGFR, SHH, EEF2K, LDLR, TGM2, ABCA2, TNK2, ITGA2, AP3D1, ARHGAP27, SYNJ2, CSNK1E, SORL1, IGF2R, SYT7, TPCN1, VEGFA, AXL, IL1B, MYH9, CD9, LRP10
GO:0008654~phospholipid biosynthetic process	12	2.8436	0.00738647	VAC14, PTDSS2, ABCA2, MVK, PCYT2, DGKD, DGKA, PI4KA, PDGFB, SYNJ2, AGPAT3, CDS2
GO:0009967~positive regulation of signal transduction	50	11.8483	0.00738869	BCAR3, CYFIP1, DGKD, F11R, AKAP12, SHH, GRB10, CTSD, TGM2, UNC13B, MAP2K3, DUSP5, PLEKHG5, TRAF1, CSNK1E, SLC39A14, MN1, POR, IL1B, ADAM8, KMT2D, SEMA7A, TNXB, SLC20A1, PDGFB, MST1R, ADRB2, TNFRSF11A, EGFR, RELN, STK36, HSF1, FLNA, BAK1, KCNN4, ZBTB7B, NTSR1, JAG1, JUP, LAMB2, WNT7B, LIF, WNT7A, TNFRSF10A, SORL1, VEGFA, ASXL1, AXL, PKN1, MAP3K14
GO:0014015~positive regulation of gliogenesis	7	1.65877	0.00744313	SLC7A5, SHH, EGR2, IL1B, DAG1, LIF, EGFR
GO:0015918~sterol transport	9	2.1327	0.00759123	ABCA2, EEPD1, OSBPL7, SHH, ABCA3, LDLR, ABCG1, SYT7, OSBP2
GO:0009895~negative regulation of catabolic process	14	3.31754	0.00761794	USP36, EHMT2, ACACB, SORL1, EGFR, USP19, BAG6, SLC7A5, SHH, IL1B, PKP1, FLNA, QSOX1, GIT1
GO:0033619~membrane protein proteolysis	6	1.4218	0.00768323	ADAM19, IL1B, PSEN2, DAG1, MYH9, ADAM8
GO:0016126~sterol biosynthetic process	6	1.4218	0.00768323	SREBF1, POR, MVK, DHCR24, DHCR7, ABCG1
GO:0007399~nervous system development	71	16.8246	0.00768629	EPHB6, CYFIP1, CHRM3, NRP2, ITGB4, EHMT2, SLC2A1, CELSR2, PTPRF, SHH, EEF2K, CDH1, DAG1, GIT1, EPHB3, TGM2, SUN1, ZHX2, ITGA3, DDX56, SOX13, SHROOM3, CSNK1E, SLC7A5, IL1B, ITGA6, RAPGEF5, NGEF, CERS2, EPHA2, CAMK2B, SEMA7A, SEMA3B, ATP1A3, MST1R, EGFR, NPAS2, BAG6, RELN, STK36, PLXNA2, FLNA, MBP, BAK1, PCDH1, PLXNA3, SPTBN2, ABCA2, EGR2, JAG1, LAMB2, ATP8B1, SEMA4B, WNT7B, SEC16A, LIF, LSAMP, WNT…
GO:0022603~regulation of anatomical structure morphogenesis	37	8.76777	0.00780577	CAMK2B, CYFIP1, SEMA7A, SEMA3B, SLC4A2, F11R, CELSR2, SHH, EEF2K, RELN, CDH1, DAG1, PLXNA2, FLNA, MBP, EPHB3, PLXNA3, IL4R, JAG1, JUP, SEMA4B, LIF, SHROOM3, WNT7A, VEGFA, DIAPH1, POR, CLDN4, INF2, IL1B, CDC42EP3, MYH9, PLXNB2, PKN1, P4HB, NGEF, EPHA2
GO:0071716~leukotriene transport	3	0.7109	0.00797082	ABCC3, ABCC1, ABCC10
GO:1904951~positive regulation of establishment of protein localization	16	3.79147	0.00797467	UNC13B, USP36, CEMIP, JUP, SEC16A, SORL1, EGFR, ANO1, SHH, CDH1, IL1B, FLNA, ADAM8, LRRC8A, KCNN4, ABCG1
GO:0051961~negative regulation of nervous system development	15	3.5545	0.00801745	SEMA7A, ZHX2, JAG1, SEMA4B, SEMA3B, WNT7A, SORL1, SHH, CDH1, IL1B, FLNA, MBP, NGEF, CERS2, PLXNA3
GO:0043269~regulation of ion transport	27	6.3981	0.00809608	RAB3B, CAMK2B, CHRM3, CEMIP, AHNAK, PDGFB, TNFRSF11A, ADRB2, ATP1A1, RELN, FLNA, BAK1, CAPN1, KCNN4, NTSR1, ACSL1, ATP8B1, WFS1, ABCA3, TRPV3, SLC8B1, SYT7, TPCN1, DIAPH1, SLC7A5, SLC6A9, IL1B
GO:0043406~positive regulation of MAP kinase activity	11	2.60664	0.00810207	MAP2K3, DUSP5, IL1B, WNT7B, PDGFB, ADAM8, PKN1, MST1R, TNFRSF11A, EGFR, VEGFA
GO:0021543~pallium development	11	2.60664	0.00810207	SUN1, NRP2, RELN, ATG16L1, SLC2A1, OGDH, FLNA, ATP1A3, TRAPPC9, EGFR, PLXNA3
GO:0044242~cellular lipid catabolic process	12	2.8436	0.00818072	PLA2G15, CPT1A, AUP1, ADRB2, PNPLA6, CPT1C, ACACB, SORL1, LDLR, PLBD2, MGLL, SLC27A4
GO:0071902~positive regulation of protein serine/threonine kinase activity	15	3.5545	0.00821105	MAP2K3, DUSP5, CEMIP, ACSL1, WNT7B, PDGFB, TNFRSF10A, MST1R, TNFRSF11A, ADRB2, EGFR, VEGFA, IL1B, ADAM8, PKN1
GO:0021987~cerebral cortex development	9	2.1327	0.0082402	SUN1, NRP2, RELN, SLC2A1, FLNA, ATP1A3, TRAPPC9, EGFR, PLXNA3
GO:0044723~single-organism carbohydrate metabolic process	20	4.73934	0.00826587	PYGB, CPT1A, BRAT1, PDGFB, SLC2A1, SYNJ2, ENO2, SLC39A14, NISCH, GALE, PC, MAN2A2, HECTD4, GRB10, OGDH, B3GNT3, HAS3, ST6GALNAC4, GIT1, NTSR1
GO:0050804~modulation of synaptic transmission	20	4.73934	0.00826587	UNC13B, RAB3B, CAMK2B, CYFIP1, EGR2, WNT7A, PLAT, ITPR3, EGFR, SYT7, NISCH, AKAP12, SLC6A6, RELN, SLC6A9, CDH1, IL1B, GIT1, NTSR1, DLGAP4
GO:0030277~maintenance of gastrointestinal epithelium	4	0.947867	0.00827186	MUC2, SLC22A5, TFF2, TFF1
GO:0060401~cytosolic calcium ion transport	11	2.60664	0.00838095	LETM1, DIAPH1, CEMIP, TRPV3, FLNA, ITPR3, BAK1, SLC25A23, SLC8B1, NTSR1, TPCN1
GO:0090181~regulation of cholesterol metabolic process	5	1.18483	0.00840504	SREBF1, POR, DHCR7, LDLR, ABCG1
GO:0045665~negative regulation of neuron differentiation	12	2.8436	0.00843455	SEMA7A, ZHX2, SHH, JAG1, CDH1, SEMA4B, SEMA3B, FLNA, MBP, NGEF, CERS2, PLXNA3
GO:0032787~monocarboxylic acid metabolic process	24	5.6872	0.00850895	OSBPL7, ABCC1, CPT1A, TNXB, ACSL1, PTGES2, ATP8B1, ENO2, CPT1C, ABCC10, ACACB, PLA2G15, FADS2, FA2H, POR, PC, RDH10, IL1B, FASN, CYP2S1, OGDH, GIT1, MGLL, SLC27A4
GO:0008202~steroid metabolic process	15	3.5545	0.00858804	SREBF1, ABCA2, OSBPL7, MVK, ATP8B1, DHCR24, ATP1A1, SHH, POR, IL1B, SNAI1, DHCR7, LDLR, NFE2L1, ABCG1
GO:0048699~generation of neurons	48	11.3744	0.00860137	EPHB6, CAMK2B, CYFIP1, SEMA7A, NRP2, EHMT2, SEMA3B, CELSR2, PTPRF, EGFR, SHH, EEF2K, RELN, CDH1, DAG1, PLXNA2, FLNA, MBP, GIT1, EPHB3, PLXNA3, TGM2, ZHX2, EGR2, JAG1, LAMB2, ATP8B1, ITGA3, SEMA4B, WNT7B, DDX56, LIF, WNT7A, CSNK1E, TRAPPC9, SORL1, VEGFA, SLC7A5, AXL, IL1B, BHLHE40, OGDH, PLXNB2, ITGA6, ZNF335, NGEF, CERS2, EPHA2
GO:0014031~mesenchymal cell development	7	1.65877	0.00877311	SEMA7A, SHH, NRP2, JAG1, RDH10, SEMA4B, SEMA3B
GO:0006023~aminoglycan biosynthetic process	7	1.65877	0.00877311	CEMIP, CHPF2, IL1B, PDGFB, B3GNT3, HAS3, ST3GAL1
GO:1905954~positive regulation of lipid localization	8	1.89573	0.00877758	EEPD1, ACSL1, IL1B, ABCA3, TNFRSF11A, ACACB, ABCG1, NTSR1
GO:1901617~organic hydroxy compound biosynthetic process	12	2.8436	0.00895425	SREBF1, ABCA2, OSBPL7, PDXK, POR, MVK, IL1B, SNAI1, DHCR24, DHCR7, ABCG1, NTSR1
GO:0060560~developmental growth involved in morphogenesis	12	2.8436	0.00895425	CYFIP1, SEMA7A, SHH, NRP2, CDH1, LAMB2, RDH10, WNT7B, SEMA4B, SEMA3B, PLXNA3, VEGFA
GO:0071407~cellular response to organic cyclic compound	23	5.45024	0.00898143	KMT2D, OSBPL7, JUP, EHMT2, ITGA2, PDE2A, PDGFB, ATP1A3, PLAT, ATP1A1, EGFR, DIAPH1, MN1, EEF2K, CDH1, IL1B, P2RY2, HSF1, DAG1, ITGA6, PKN1, NFE2L1, TGM2
GO:0051247~positive regulation of protein metabolic process	53	12.5592	0.00898279	POMT2, BCAR3, CDKN1A, AKAP12, DAG1, TNKS1BP1, CTSD, MAP2K3, DUSP5, SREBF1, ACSL1, ITGA2, TRAF1, CSNK1E, CLDN4, GPRC5A, IL1B, MYH9, ADAM8, GPRC5C, ABCG1, SEMA7A, CEMIP, TNXB, BRAT1, PDGFB, MST1R, ADRB2, TNFRSF11A, CAMKK1, EGFR, BAG6, RELN, HSF1, MBP, BAK1, ZBTB7B, LDLR, ABCA2, OSBPL7, WFS1, WNT7B, TNK2, LIF, WNT7A, TNFRSF10A, SORL1, VEGFA, SLC25A37, SLC6A9, DNAJA3, PLXNB2, PKN1
GO:0014037~Schwann cell differentiation	5	1.18483	0.00916853	FA2H, EGR2, LAMB2, ITGB4, DAG1
GO:0032370~positive regulation of lipid transport	7	1.65877	0.00925197	EEPD1, ACSL1, IL1B, ABCA3, TNFRSF11A, ABCG1, NTSR1
GO:0048534~hematopoietic or lymphoid organ development	32	7.58294	0.0092561	ALAS1, TNFRSF11A, TOB2, SIPA1L3, SHH, SH3PXD2A, HSF1, FLNA, LRRC8A, BAK1, ZBTB7B, ST3GAL1, EPHB3, IL4R, JAG1, PDE2A, LIF, SYVN1, SOX13, AP3D1, NBEAL2, KRT75, VEGFA, ASXL1, AXL, DNAJA3, FASN, IL1B, MYH9, ADAM8, PKN1, EPHA2
GO:0072112~glomerular visceral epithelial cell differentiation	4	0.947867	0.00943674	ASXL1, JAG1, LAMB2, PODXL
GO:0061318~renal filtration cell differentiation	4	0.947867	0.00943674	ASXL1, JAG1, LAMB2, PODXL
GO:0051336~regulation of hydrolase activity	36	8.53081	0.00952559	BCAR3, SH2D4A, RGS16, F11R, SIPA1L3, EGFR, HSF1, RPS6KA1, PLXNA2, MBP, BAK1, RALGDS, CTSD, EPHB3, PLXNA3, TGM2, ABCA2, SERPINB1, SERPIND1, ITGA2, DHCR24, ARHGAP27, RANGAP1, SLC39A14, SORL1, VEGFA, POR, CLDN4, SLPI, DNAJA3, PLXNB2, ITGA6, RAPGEF5, NGEF, EPHA2, SLC27A4
GO:0006970~response to osmotic stress	7	1.65877	0.00974921	LETM1, ITGA2, SLC2A1, LRRC8A, PKN1, SLC25A23, EGFR
GO:0044712~single-organism catabolic process	33	7.81991	0.0098958	POMT2, PYGB, ADRB2, AUP1, ENO2, ACACB, USP19, SGSH, BAG6, LDLR, GIT1, NTSR1, APOBEC3C, ABCC1, CPT1A, WFS1, PDE2A, GOT2, ENTPD6, SYVN1, SYNJ2, CPT1C, SORL1, PLA2G15, POR, GALE, ADAM15, IL1B, OGDH, PNPLA6, MGLL, PLBD2, SLC27A4
GO:0006694~steroid biosynthetic process	10	2.36967	0.00994973	SREBF1, OSBPL7, POR, MVK, IL1B, SNAI1, DHCR24, DHCR7, ATP1A1, ABCG1
GO:0035335~peptidyl-tyrosine dephosphorylation	5	1.18483	0.00997581	DUSP4, DUSP5, PTPRH, DUSP8, PTPRF
GO:0043092~L-amino acid import	5	1.18483	0.00997581	SLC7A5, SLC6A9, SLC1A4, SLC7A1, NTSR1
GO:0050793~regulation of developmental process	77	18.2464	0.00998409	CYFIP1, CDKN1A, SLC4A2, F11R, CELSR2, PTPRF, SHH, EEF2K, CDH1, RPS6KA1, DAG1, FLOT2, EPHB3, TGM2, ZHX2, IL4R, ITGA3, DDX56, SOX13, SHROOM3, CSNK1E, SLC7A5, POR, CLDN4, INF2, IL1B, CDC42EP3, MYH9, ITGA6, ADAM8, ABCG1, NGEF, CERS2, EPHA2, FBN2, CAMK2B, SEMA7A, TNXB, SEMA3B, PDGFB, ADRB2, TOB2, ACACB, EGFR, USP19, BAG6, RELN, HSF1, PLXNA2, FLNA, MBP, BRD9, LRRC8A, ZBTB7B, PLXNA3, EGR2, JAG1, JUP, LA…
GO:0097035~regulation of membrane lipid distribution	6	1.4218	0.00999563	ABCA2, ABCC1, ATP8B1, ABCA3, KCNN4, ABCG1
GO:0051091~positive regulation of sequence-specific DNA binding transcription factor activity	13	3.08057	0.0102633	JUP, TRAF1, TRAPPC9, TNFRSF11A, VEGFA, SHH, RELN, STK36, IL1B, HSF1, FLOT2, ADAM8, NTSR1
GO:0072009~nephron epithelium development	8	1.89573	0.0104875	ASXL1, SHH, JAG1, LAMB2, PODXL, WNT7B, LIF, VEGFA
GO:1990778~protein localization to cell periphery	15	3.5545	0.0105333	RAB3B, JUP, ITGA3, SEC16A, F11R, EFR3B, SORL1, EGFR, GRIP2, TSPAN15, KRT18, CDH1, FLNA, FLOT2, EPHA2
GO:0010817~regulation of hormone levels	21	4.9763	0.0106071	SREBF1, CPT1A, LIF, PCSK7, ATP1A1, SLC8B1, SLC39A14, EGFR, SYT7, ANO1, SLC7A5, SHH, POR, SLCO4A1, RDH10, IL1B, CYP2S1, LRRC8A, P4HB, DHCR7, ABCG1
GO:0050808~synapse organization	16	3.79147	0.0106799	UNC13B, CAMK2B, CYFIP1, LAMB2, ITGA3, WNT7B, WNT7A, PTPRF, EEF2K, RELN, CDH1, DNAJA3, PLXNB2, FLNA, EPHB3, SPTBN2
GO:0072311~glomerular epithelial cell differentiation	4	0.947867	0.0106924	ASXL1, JAG1, LAMB2, PODXL
GO:0048878~chemical homeostasis	40	9.47867	0.0107553	STEAP3, CEMIP, ATP1A3, ITPR3, ATP1A1, SLC4A2, EGFR, P2RY2, HECTD4, CCRL2, ATP6V0A2, FLNA, LRRC8A, BAK1, SLC25A23, LDLR, NTSR1, TGM2, UNC13B, ABCA2, SLC12A4, WFS1, ABCA3, WNT7B, AP3D1, TRPV3, SLC8B1, SLC39A14, TPCN1, VEGFA, LETM1, DIAPH1, ANO1, SLC25A37, FA2H, CLDN4, SLC29A1, CYB561, ABCG1, NFE2L1
GO:0033554~cellular response to stress	58	13.7441	0.0107837	POMT2, CDKN1A, EHMT2, SLC2A1, AUP1, PTPRF, EEF2K, RPS6KA1, DAG1, TNKS1BP1, POLE, MAP2K3, SREBF1, ABCC1, TRAF1, CSNK1E, ANO1, SLC7A5, IL1B, ADAM8, SLC29A1, CERS2, EPHA2, OTUB2, TNXB, AP5Z1, BRAT1, TNFRSF11A, EGFR, USP19, NPAS2, BAG6, HSF1, FLNA, BAK1, ZBTB7B, SLC25A23, TRAP1, ACD, WFS1, LAMB2, WNT7B, SEC16A, GSR, SYVN1, WNT7A, VEGFA, LETM1, EEPD1, AXL, DNAJA3, CCDC88C, SNAI1, UBA1, HYOU1, P4HB, PK…
GO:0006493~protein O-linked glycosylation	7	1.65877	0.0108003	POMT2, GALNT6, GALNT18, B3GNT3, ST3GAL1, ST6GALNAC4, GALNT10
GO:0030335~positive regulation of cell migration	22	5.21327	0.0108084	MAP2K3, SEMA7A, NRP2, CEMIP, ITGA3, SEMA4B, ITGA2, SEMA3B, PDGFB, WNT7A, EGFR, VEGFA, DIAPH1, CLDN4, RELN, PODXL, IL1B, SNAI1, FLNA, ADAM8, ITGA6, EPHA2
GO:0016266~O-glycan processing	5	1.18483	0.0108278	GALNT6, B3GNT3, ST3GAL1, ST6GALNAC4, GALNT10
GO:1902837~amino acid import into cell	5	1.18483	0.0108278	SLC6A6, SLC7A5, SLC1A4, SLC7A1, NTSR1
GO:0006816~calcium ion transport	18	4.2654	0.0109796	CEMIP, AHNAK, WFS1, PSEN2, PDGFB, TRPV3, ITPR3, SLC8B1, TPCN1, LETM1, DIAPH1, SEC61A1, FLNA, BAK1, KCNN4, SLC25A23, SLC25A25, NTSR1
GO:0043010~camera-type eye development	15	3.5545	0.0109944	FBN2, BCAR3, ZHX2, JAG1, LAMB2, WNT7B, WNT7A, EGFR, VEGFA, SHH, RDH10, COL8A1, BAK1, SLC25A25, EPHA2
GO:0023014~signal transduction by protein phosphorylation	28	6.63507	0.0111442	BCAR3, SEMA7A, TNXB, PDGFB, MST1R, TNFRSF11A, ADRB2, EGFR, AKAP12, HSF1, DAG1, GRB10, MBP, MAP2K3, DUSP4, DUSP5, WNT7B, LIF, WNT7A, TRAF1, DUSP8, SORL1, VEGFA, IL1B, ADAM8, PKN1, MAP3K14, EPHA2
GO:0000165~MAPK cascade	28	6.63507	0.0111442	BCAR3, SEMA7A, TNXB, PDGFB, MST1R, TNFRSF11A, ADRB2, EGFR, AKAP12, HSF1, DAG1, GRB10, MBP, MAP2K3, DUSP4, DUSP5, WNT7B, LIF, WNT7A, TRAF1, DUSP8, SORL1, VEGFA, IL1B, ADAM8, PKN1, MAP3K14, EPHA2
GO:0043436~oxoacid metabolic process	35	8.29384	0.0112517	TNXB, SLC2A1, ENO2, ABCC10, ACACB, HS6ST3, SGSH, FADS2, RDH10, VARS2, ST3GAL1, GIT1, OSBPL7, ABCC1, CPT1A, ACSL1, PTGES2, CHPF2, ATP8B1, CAD, GOT2, CPT1C, PLA2G15, FA2H, POR, PC, FASN, CYP2S1, IL1B, B3GNT3, OGDH, P4HB, FARSA, MGLL, SLC27A4
GO:0001656~metanephros development	7	1.65877	0.0113548	SHH, FRAS1, LAMB2, RDH10, WNT7B, PDGFB, LIF
GO:0006650~glycerophospholipid metabolic process	14	3.31754	0.0114378	VAC14, PCYT2, DGKD, DGKA, ABCA3, PDGFB, SYNJ2, EFR3B, AGPAT3, PLA2G15, PTDSS2, PI4KA, PNPLA6, CDS2
GO:0010256~endomembrane system organization	27	6.3981	0.0115429	RAB3B, AHNAK, F11R, EGFR, BAG6, SEC61A1, TMEM201, TMEM43, CDH1, FLNA, FLOT2, SUN1, JUP, ATP8B1, ITGA3, SEC16A, AP3D1, EFR3B, SORL1, GRIP2, SYT7, TSPAN15, FA2H, KRT18, MYH9, ABCG1, EPHA2
GO:0009306~protein secretion	16	3.79147	0.0116392	UNC13B, RAB3B, SREBF1, STEAP3, CPT1A, SLC8B1, SORL1, EGFR, SYT7, ANO1, IL1B, PREB, ADAM8, LRRC8A, KCNN4, ABCG1
GO:0048522~positive regulation of cellular process	144	34.1232	0.0117143	EPHB6, RAB3B, CYFIP1, DGKD, F11R, CDH1, ZMIZ2, RPS6KA1, DAG1, GRB10, CAPN1, EPHB3, TGM2, UNC13B, MAP2K3, CPT1A, IL4R, ACSL1, USP2, SOX13, CSNK1E, POR, CLDN4, ADAM8, ABCG1, EPHA2, SLC27A4, FBN2, KLHL18, KMT2D, SEMA7A, CEMIP, KMT2B, NOP2, PDGFB, ITPR3, TNFRSF11A, MST1R, ADRB2, NPAS2, BAG6, STK36, PODXL, RDH10, PLXNA2, MBP, ZBTB7B, KCNN4, NTSR1, PLXNA3, ABCA2, ACD, EGR2, OSBPL7, JAG1, JUP, WFS1, ABC…
GO:0072337~modified amino acid transport	5	1.18483	0.0117254	SLC5A6, SLC7A5, ABCC1, SLCO4A1, SLC1A4
GO:0035690~cellular response to drug	6	1.4218	0.0120151	IL1B, EHMT2, HSF1, PDE2A, CAD, EGFR
GO:0045540~regulation of cholesterol biosynthetic process	4	0.947867	0.0120401	SREBF1, POR, DHCR7, ABCG1
GO:2000193~positive regulation of fatty acid transport	4	0.947867	0.0120401	ACSL1, IL1B, TNFRSF11A, NTSR1
GO:0046474~glycerophospholipid biosynthetic process	10	2.36967	0.0121898	VAC14, PTDSS2, PCYT2, DGKD, DGKA, PI4KA, PDGFB, SYNJ2, AGPAT3, CDS2
GO:0001667~ameboidal-type cell migration	19	4.50237	0.0122309	MAP2K3, SEMA7A, NRP2, JUP, ITGB4, ITGA3, PLEKHG5, SEMA4B, ITGA2, SEMA3B, PDGFB, WNT7A, VEGFA, SHH, TMEM201, SNAI1, MYH9, PKN1, EPHA2
GO:0070482~response to oxygen levels	16	3.79147	0.0123488	CDKN1A, ALAS1, ITGA2, PSEN2, SLC2A1, PLAT, VEGFA, SLC7A5, EEF2K, ADAM15, HSF1, ATP6V0A2, ADAM8, HYOU1, P4HB, SLC29A1
GO:0045109~intermediate filament organization	6	1.4218	0.0127455	KRT81, SHH, KRT80, PKP1, KRT86, KRT75
GO:0045446~endothelial cell differentiation	8	1.89573	0.0129507	JAG1, IL1B, FASN, WNT7B, PDE2A, WNT7A, F11R, VEGFA
GO:0043066~negative regulation of apoptotic process	31	7.34597	0.0129567	SLC35F6, CDKN1A, PSEN2, FHL2, EGFR, BAG6, SHH, EEF2K, HSF1, RPS6KA1, FLNA, BAK1, ST3GAL1, NTSR1, TGM2, TRAP1, WFS1, SYVN1, WNT7A, DHCR24, VEGFA, SLC7A5, POR, KRT18, AXL, DNAJA3, IL1B, SNAI1, ITGA6, HYOU1, ADAM8
GO:0099537~trans-synaptic signaling	25	5.92417	0.013037	RAB3B, CAMK2B, CYFIP1, CHRM3, PLAT, SLC1A4, ITPR3, EGFR, RELN, CDH1, RPS6KA1, DAG1, MBP, GIT1, NTSR1, DLGAP4, UNC13B, SLC12A4, EGR2, WNT7A, SYT7, NISCH, SLC6A9, IL1B, SLC29A1
GO:0006468~protein phosphorylation	55	13.0332	0.0130797	EPHB6, BCAR3, CDKN1A, PTPRH, ZFYVE28, AKAP12, EEF2K, RPS6KA1, DAG1, GRB10, TNKS1BP1, CNPPD1, EPHB3, DUSP4, MAP2K3, DUSP5, ACSL1, CAD, TRAF1, CSNK1E, DUSP8, GPRC5A, IL1B, ADAM8, GPRC5C, EPHA2, CAMK2B, SEMA7A, CEMIP, TNXB, BRAT1, PDGFB, MST1R, ADRB2, TNFRSF11A, CAMKK1, EGFR, RELN, STK36, HSF1, MBP, BAK1, ST3GAL1, WNT7B, TNK2, LIF, WNT7A, TNFRSF10A, CDC42BPB, SORL1, VEGFA, AXL, DNAJA3, PKN1, MAP3K14
GO:0014033~neural crest cell differentiation	7	1.65877	0.0131387	SEMA7A, SHH, NRP2, JAG1, RDH10, SEMA4B, SEMA3B
GO:0021612~facial nerve structural organization	3	0.7109	0.0133043	EGR2, NRP2, PLXNA3
GO:0070527~platelet aggregation	6	1.4218	0.0135053	CSRP1, CD9, MYH9, FLNA, F11R, PEAR1
GO:1903793~positive regulation of anion transport	6	1.4218	0.0135053	SLC7A5, ACSL1, IL1B, ABCA3, TNFRSF11A, NTSR1
GO:0050994~regulation of lipid catabolic process	6	1.4218	0.0135053	CPT1A, IL1B, ADRB2, ACACB, SORL1, LDLR
GO:0051239~regulation of multicellular organismal process	88	20.8531	0.0135158	CYFIP1, CHRM3, NRP2, PLAT, SLC4A2, F11R, CELSR2, PTPRF, AKAP12, THBD, SHH, EEF2K, CDH1, DAG1, GIT1, EPHB3, TGM2, MAP2K3, SREBF1, SERPINB1, ZHX2, IL4R, ITGA3, ITGA2, DDX56, SOX13, CSNK1E, SLC7A5, POR, IL1B, TFF2, ITGA6, ADAM8, NGEF, MGLL, CERS2, EPHA2, FBN2, CAMK2B, SEMA7A, SLC22A5, TNXB, SEMA3B, PDGFB, ATP1A3, ADRB2, TNFRSF11A, ATP1A1, TOB2, ACACB, ADCY7, EGFR, USP19, NPAS2, BAG6, RELN, P2RY2, HS…
GO:0085029~extracellular matrix assembly	5	1.18483	0.0136605	TNXB, LAMB2, DAG1, HAS3, QSOX1
GO:0035295~tube development	23	5.45024	0.0136631	SREBF1, CDKN1A, JAG1, ITGA3, ABCA3, WNT7B, LIF, SHROOM3, WNT7A, SLC4A2, EGFR, VEGFA, ASXL1, BAG6, SHH, PODXL, RDH10, DAG1, PLXNA2, PLXNB2, EPHB3, TGM2, EPHA2
GO:0006082~organic acid metabolic process	35	8.29384	0.0137512	TNXB, SLC2A1, ENO2, ABCC10, ACACB, HS6ST3, SGSH, FADS2, RDH10, VARS2, ST3GAL1, GIT1, OSBPL7, ABCC1, CPT1A, ACSL1, PTGES2, CHPF2, ATP8B1, CAD, GOT2, CPT1C, PLA2G15, FA2H, POR, PC, FASN, CYP2S1, IL1B, B3GNT3, OGDH, P4HB, FARSA, MGLL, SLC27A4
GO:0060173~limb development	10	2.36967	0.0143258	FBN2, ACD, SHH, FRAS1, ITGB4, RDH10, PLXNA2, WNT7A, ITGA6, BAK1
GO:0048736~appendage development	10	2.36967	0.0143258	FBN2, ACD, SHH, FRAS1, ITGB4, RDH10, PLXNA2, WNT7A, ITGA6, BAK1
GO:0032368~regulation of lipid transport	9	2.1327	0.0145094	ABCA2, EEPD1, SHH, ACSL1, IL1B, ABCA3, TNFRSF11A, ABCG1, NTSR1
GO:0070509~calcium ion import	11	2.60664	0.0145805	LETM1, DIAPH1, CEMIP, PDGFB, TRPV3, FLNA, ITPR3, SLC25A23, SLC8B1, NTSR1, TPCN1
GO:0032365~intracellular lipid transport	5	1.18483	0.0146995	ABCA2, CPT1A, LDLR, ABCG1, SYT7
GO:0040017~positive regulation of locomotion	23	5.45024	0.01471	MAP2K3, SEMA7A, NRP2, CEMIP, ITGA3, SEMA4B, ITGA2, SEMA3B, PDGFB, WNT7A, EGFR, VEGFA, DIAPH1, CLDN4, PC, RELN, PODXL, IL1B, SNAI1, FLNA, ADAM8, ITGA6, EPHA2
GO:0071375~cellular response to peptide hormone stimulus	14	3.31754	0.0147487	BCAR3, SREBF1, CYFIP1, RANGAP1, SLC39A14, SORL1, POR, EEF2K, IL1B, HSF1, GRB10, ZBTB7B, CTSD, SLC27A4
GO:0006631~fatty acid metabolic process	17	4.02844	0.0147826	ABCC1, CPT1A, TNXB, ACSL1, PTGES2, CPT1C, ABCC10, ACACB, PLA2G15, FADS2, FA2H, POR, IL1B, FASN, CYP2S1, MGLL, SLC27A4
GO:0050870~positive regulation of T cell activation	12	2.8436	0.0148457	EPHB6, CCDC88B, SHH, IL4R, IL1B, DNAJA3, SOX13, AP3D1, FLOT2, ADAM8, ZBTB7B, SLC7A1
GO:0048589~developmental growth	24	5.6872	0.0149817	KMT2D, CYFIP1, CDKN1A, SEMA7A, NRP2, LAMB2, EHMT2, SEMA4B, WNT7B, SEMA3B, WNT7A, ADRB2, ACACB, VEGFA, SHH, POR, ADAM15, CDH1, RDH10, DAG1, CD9, SLC25A25, PLXNA3, SPTBN2
GO:0010893~positive regulation of steroid biosynthetic process	4	0.947867	0.0150155	SREBF1, POR, IL1B, ABCG1
GO:0072010~glomerular epithelium development	4	0.947867	0.0150155	ASXL1, JAG1, LAMB2, PODXL
GO:0051560~mitochondrial calcium ion homeostasis	4	0.947867	0.0150155	LETM1, SLC25A23, SLC8B1, TGM2
GO:0080134~regulation of response to stress	48	11.3744	0.0150898	OTUB2, CDKN1A, SEMA7A, TNXB, MVK, AHNAK, PDGFB, PLAT, TNFRSF11A, F11R, ADCY7, PTPRF, EGFR, USP19, NPAS2, BAG6, THBD, ZDHHC18, HSF1, FLNA, BAK1, ZBTB7B, SLC25A23, LDLR, TGM2, TRAP1, ABCC1, WFS1, ITGA2, WNT7B, PDE2A, SYVN1, WNT7A, TRAF1, VEGFA, LETM1, CLDN4, DNAJA3, IL1B, SNAI1, MYH9, CD9, HYOU1, ADAM8, PKN1, P4HB, MGLL, CERS2
GO:0022029~telencephalon cell migration	6	1.4218	0.0151152	SUN1, NRP2, RELN, OGDH, EGFR, PLXNA3
GO:0050771~negative regulation of axonogenesis	6	1.4218	0.0151152	SEMA7A, CDH1, SEMA4B, SEMA3B, MBP, PLXNA3
GO:0060402~calcium ion transport into cytosol	10	2.36967	0.015255	LETM1, DIAPH1, CEMIP, TRPV3, FLNA, ITPR3, BAK1, SLC8B1, NTSR1, TPCN1
GO:0032869~cellular response to insulin stimulus	11	2.60664	0.0154359	BCAR3, SREBF1, CYFIP1, EEF2K, IL1B, GRB10, ZBTB7B, CTSD, SLC39A14, SORL1, SLC27A4
GO:0016032~viral process	26	6.16114	0.015526	ITGB5, MST1R, AUP1, F11R, SLC7A1, EGFR, DAG1, ST3GAL1, LDLR, APOBEC3C, ITGA2, DDX56, IGF2R, TPCN1, PC, POLR3A, SLPI, ATG16L1, AXL, IL1B, MGAT4B, PI4KA, P4HB, ST6GALNAC4, MAP3K14, EPHA2
GO:0030097~hemopoiesis	30	7.109	0.0155883	ALAS1, TNFRSF11A, TOB2, SIPA1L3, SHH, SH3PXD2A, HSF1, FLNA, LRRC8A, BAK1, ZBTB7B, ST3GAL1, IL4R, JAG1, PDE2A, LIF, SYVN1, SOX13, AP3D1, NBEAL2, KRT75, VEGFA, ASXL1, AXL, DNAJA3, FASN, IL1B, MYH9, ADAM8, EPHA2
GO:0060251~regulation of glial cell proliferation	5	1.18483	0.0157872	SLC7A5, SHH, IL1B, EGFR, CERS2
GO:0030517~negative regulation of axon extension	5	1.18483	0.0157872	SEMA7A, CDH1, SEMA4B, SEMA3B, PLXNA3
GO:1902667~regulation of axon guidance	5	1.18483	0.0157872	SEMA7A, SEMA4B, SEMA3B, PLXNA3, VEGFA
GO:0007595~lactation	5	1.18483	0.0157872	GOT2, CAD, ZBTB7B, SLC29A1, VEGFA
GO:0032527~protein exit from endoplasmic reticulum	5	1.18483	0.0157872	SEC16A, SYVN1, PREB, AUP1, SORL1
GO:0050919~negative chemotaxis	5	1.18483	0.0157872	SEMA7A, NRP2, SEMA4B, SEMA3B, PLXNA3
GO:1903510~mucopolysaccharide metabolic process	7	1.65877	0.0158105	CEMIP, CHPF2, IL1B, PDGFB, B3GNT3, HAS3, ST3GAL1
GO:0034109~homotypic cell-cell adhesion	7	1.65877	0.0158105	JUP, CSRP1, CD9, MYH9, FLNA, F11R, PEAR1
GO:0006865~amino acid transport	9	2.1327	0.0160933	SLC6A6, SLC7A5, SLC7A6, SLC6A9, SFXN3, LRRC8A, SLC1A4, SLC7A1, NTSR1
GO:1902107~positive regulation of leukocyte differentiation	10	2.36967	0.0162226	SHH, IL4R, AXL, IL1B, HSF1, LIF, SOX13, AP3D1, ADAM8, ZBTB7B
GO:0060548~negative regulation of cell death	34	8.05687	0.0163154	SLC35F6, CDKN1A, PSEN2, FHL2, ENO2, EGFR, NPAS2, BAG6, SHH, EEF2K, HSF1, RPS6KA1, FLNA, BAK1, ST3GAL1, NTSR1, TGM2, TRAP1, WFS1, SYVN1, WNT7A, DHCR24, SORL1, VEGFA, SLC7A5, POR, KRT18, AXL, DNAJA3, IL1B, SNAI1, ITGA6, HYOU1, ADAM8
GO:0099536~synaptic signaling	25	5.92417	0.0163645	RAB3B, CAMK2B, CYFIP1, CHRM3, PLAT, SLC1A4, ITPR3, EGFR, RELN, CDH1, RPS6KA1, DAG1, MBP, GIT1, NTSR1, DLGAP4, UNC13B, SLC12A4, EGR2, WNT7A, SYT7, NISCH, SLC6A9, IL1B, SLC29A1
GO:0030203~glycosaminoglycan metabolic process	8	1.89573	0.0164249	CEMIP, CHPF2, IL1B, PDGFB, B3GNT3, HAS3, ST3GAL1, SGSH
GO:0051130~positive regulation of cellular component organization	43	10.1896	0.0165304	CAMK2B, USP36, CYFIP1, SEMA7A, DGKD, TNXB, AHNAK, PDGFB, ADRB2, EGFR, EEF2K, RELN, HSF1, DAG1, HAS3, PLXNA2, FLNA, BAK1, ZBTB7B, COLGALT1, GIT1, EPHB3, PLXNA3, UNC13B, SREBF1, ACD, IL4R, ITGA3, ABCA3, ITGA2, DDX56, LIF, WNT7A, VEGFA, MED24, AXL, IL1B, CDC42EP3, PLXNB2, ITGA6, P4HB, ABCG1, EPHA2
GO:0006641~triglyceride metabolic process	7	1.65877	0.016533	SREBF1, CPT1A, TNXB, ACSL1, SORL1, LDLR, MGLL
GO:0043547~positive regulation of GTPase activity	13	3.08057	0.0167181	BCAR3, RGS16, ARHGAP27, F11R, RANGAP1, SIPA1L3, ITGA6, RAPGEF5, RALGDS, NGEF, TGM2, EPHA2, SLC27A4
GO:0030182~neuron differentiation	42	9.95261	0.0167662	EPHB6, CAMK2B, CYFIP1, SEMA7A, NRP2, EHMT2, SEMA3B, CELSR2, PTPRF, EGFR, SHH, EEF2K, RELN, CDH1, DAG1, PLXNA2, FLNA, MBP, GIT1, EPHB3, PLXNA3, ZHX2, EGR2, JAG1, LAMB2, ATP8B1, ITGA3, SEMA4B, WNT7B, DDX56, LIF, WNT7A, CSNK1E, TRAPPC9, VEGFA, OGDH, PLXNB2, ITGA6, ZNF335, NGEF, CERS2, EPHA2
GO:0032892~positive regulation of organic acid transport	5	1.18483	0.0169242	SLC7A5, ACSL1, IL1B, TNFRSF11A, NTSR1
GO:2000147~positive regulation of cell motility	22	5.21327	0.0169589	MAP2K3, SEMA7A, NRP2, CEMIP, ITGA3, SEMA4B, ITGA2, SEMA3B, PDGFB, WNT7A, EGFR, VEGFA, DIAPH1, CLDN4, RELN, PODXL, IL1B, SNAI1, FLNA, ADAM8, ITGA6, EPHA2
GO:0061041~regulation of wound healing	10	2.36967	0.017267	THBD, CDKN1A, CLDN4, AHNAK, PDGFB, CD9, MYH9, FLNA, PLAT, F11R
GO:0007369~gastrulation	10	2.36967	0.017267	DUSP4, DUSP5, ITGB5, ITGA3, ITGB4, ITGA2, SNAI1, COL8A1, MBP, EPHA2
GO:0030516~regulation of axon extension	7	1.65877	0.0172779	CYFIP1, SEMA7A, CDH1, SEMA4B, SEMA3B, PLXNA3, VEGFA
GO:0010771~negative regulation of cell morphogenesis involved in differentiation	7	1.65877	0.0172779	SEMA7A, CDH1, SEMA4B, SEMA3B, MBP, NGEF, PLXNA3
GO:1902476~chloride transmembrane transport	7	1.65877	0.0172779	CLCN7, CLCN6, ANO1, SLC12A4, CLDN4, LRRC8A, SLC1A4
GO:0043069~negative regulation of programmed cell death	31	7.34597	0.0174847	SLC35F6, CDKN1A, PSEN2, FHL2, EGFR, BAG6, SHH, EEF2K, HSF1, RPS6KA1, FLNA, BAK1, ST3GAL1, NTSR1, TGM2, TRAP1, WFS1, SYVN1, WNT7A, DHCR24, VEGFA, SLC7A5, POR, KRT18, AXL, DNAJA3, IL1B, SNAI1, ITGA6, HYOU1, ADAM8
GO:0001654~eye development	16	3.79147	0.0176614	FBN2, BCAR3, ZHX2, JAG1, LAMB2, WNT7B, WNT7A, SIPA1L3, EGFR, VEGFA, SHH, RDH10, COL8A1, BAK1, SLC25A25, EPHA2
GO:0044403~symbiosis, encompassing mutualism through parasitism	27	6.3981	0.0177629	ITGB5, MST1R, AUP1, F11R, SLC7A1, EGFR, DAG1, ST3GAL1, LDLR, APOBEC3C, ITGA2, DDX56, IGF2R, TPCN1, PC, POLR3A, SLPI, ATG16L1, AXL, FASN, IL1B, MGAT4B, PI4KA, P4HB, ST6GALNAC4, MAP3K14, EPHA2
GO:1902475~L-alpha-amino acid transmembrane transport	5	1.18483	0.0181111	SLC7A5, SLC7A6, SLC1A4, SLC7A1, NTSR1
GO:0050708~regulation of protein secretion	13	3.08057	0.0183399	UNC13B, SREBF1, CPT1A, SLC8B1, SORL1, EGFR, SYT7, ANO1, IL1B, ADAM8, LRRC8A, KCNN4, ABCG1
GO:0048843~negative regulation of axon extension involved in axon guidance	4	0.947867	0.018369	SEMA7A, SEMA4B, SEMA3B, PLXNA3
GO:0045834~positive regulation of lipid metabolic process	9	2.1327	0.0183948	SREBF1, POR, CPT1A, RDH10, IL1B, PDGFB, ADRB2, LDLR, ABCG1
GO:0070201~regulation of establishment of protein localization	22	5.21327	0.0185286	UNC13B, SREBF1, USP36, CPT1A, CEMIP, JUP, SEC16A, RANGAP1, SLC8B1, SORL1, EGFR, SYT7, ANO1, SHH, CDH1, IL1B, FLNA, ADAM8, LRRC8A, KCNN4, CTSD, ABCG1
GO:0001932~regulation of protein phosphorylation	44	10.4265	0.0186094	BCAR3, CDKN1A, SEMA7A, CEMIP, TNXB, BRAT1, PDGFB, MST1R, TNFRSF11A, ADRB2, PTPRH, CAMKK1, EGFR, ZFYVE28, AKAP12, EEF2K, RELN, HSF1, DAG1, TNKS1BP1, BAK1, CNPPD1, MAP2K3, DUSP4, DUSP5, ACSL1, TNK2, WNT7B, LIF, WNT7A, TNFRSF10A, TRAF1, DUSP8, SORL1, VEGFA, GPRC5A, DNAJA3, IL1B, CCDC88C, PLXNB2, ADAM8, PKN1, GPRC5C, EPHA2
GO:0046626~regulation of insulin receptor signaling pathway	6	1.4218	0.0187092	IL1B, GRB10, ZBTB7B, CTSD, SORL1, SLC27A4
GO:0032880~regulation of protein localization	30	7.109	0.0187181	USP36, CEMIP, CELSR2, EGFR, SHH, CDH1, FLNA, LRRC8A, KCNN4, CTSD, UNC13B, SREBF1, ABCA2, CPT1A, JUP, ITGA3, SEC16A, LIF, WNT7A, CSNK1E, RANGAP1, SLC8B1, SORL1, SYT7, VEGFA, ANO1, IL1B, ADAM8, ABCG1, EPHA2
GO:0008203~cholesterol metabolic process	8	1.89573	0.0190788	SREBF1, POR, MVK, DHCR24, DHCR7, LDLR, ABCG1, NFE2L1
GO:0002520~immune system development	32	7.58294	0.0195403	ALAS1, TNFRSF11A, TOB2, SIPA1L3, SHH, SH3PXD2A, HSF1, FLNA, LRRC8A, BAK1, ZBTB7B, ST3GAL1, EPHB3, IL4R, JAG1, PDE2A, LIF, SYVN1, SOX13, AP3D1, NBEAL2, KRT75, VEGFA, ASXL1, AXL, DNAJA3, FASN, IL1B, MYH9, ADAM8, PKN1, EPHA2
GO:0010977~negative regulation of neuron projection development	9	2.1327	0.0196299	SEMA7A, CDH1, SEMA4B, SEMA3B, FLNA, MBP, NGEF, CERS2, PLXNA3
GO:0003333~amino acid transmembrane transport	6	1.4218	0.0196882	SLC6A6, SLC7A5, SLC7A6, SLC1A4, SLC7A1, NTSR1
GO:0008544~epidermis development	15	3.5545	0.0197849	KRT81, KRT80, JAG1, KRT86, KRT75, EVPL, PPL, EGFR, FOSL2, FA2H, SHH, SNAI1, FLOT2, FLNB, EPHA2
GO:0045621~positive regulation of lymphocyte differentiation	8	1.89573	0.0197865	SHH, IL4R, AXL, IL1B, SOX13, AP3D1, ADAM8, ZBTB7B
GO:0045542~positive regulation of cholesterol biosynthetic process	3	0.7109	0.0197925	SREBF1, POR, ABCG1
GO:0021561~facial nerve development	3	0.7109	0.0197925	EGR2, NRP2, PLXNA3
GO:0021610~facial nerve morphogenesis	3	0.7109	0.0197925	EGR2, NRP2, PLXNA3
GO:0010248~establishment or maintenance of transmembrane electrochemical gradient	3	0.7109	0.0197925	ATP1A3, BAK1, ATP1A1
GO:0046907~intracellular transport	50	11.8483	0.0198384	USP36, CYFIP1, CDKN1A, CLTB, AUP1, MILR1, SEC61A1, SHH, CDH1, FLOT2, GIT1, UNC13B, SREBF1, SUN1, CPT1A, IL4R, NUP210, RANGAP1, DDX39A, WDR81, IL1B, PREB, ABCG1, CEMIP, DENND3, ADRB2, NOL6, BAG6, ZDHHC18, TMEM201, FLNA, LDLR, ABCA2, ACD, EGR2, JUP, SEC16A, SYVN1, AP3D1, WNT7A, TIMM44, SYNJ2, TRAPPC9, SORL1, SYT7, CCDC88B, CCDC88C, HYOU1, P4HB, SEC24C
GO:0031647~regulation of protein stability	14	3.31754	0.019867	SREBF1, USP36, WFS1, SEC16A, USP2, SYVN1, USP19, BAG6, NCLN, WDR81, DNAJA3, CCDC88C, FLNA, FLOT2
GO:0010976~positive regulation of neuron projection development	13	3.08057	0.0201363	CAMK2B, CYFIP1, SEMA7A, ITGA3, DDX56, VEGFA, EEF2K, RELN, PLXNA2, PLXNB2, FLNA, ITGA6, PLXNA3
GO:0010810~regulation of cell-substrate adhesion	11	2.60664	0.0203	JAG1, JUP, ADAM15, ITGA3, PDGFB, DAG1, FLNA, COL8A1, ITGA6, P4HB, VEGFA
GO:0098916~anterograde trans-synaptic signaling	24	5.6872	0.0204321	UNC13B, RAB3B, CAMK2B, CHRM3, CYFIP1, SLC12A4, EGR2, WNT7A, SLC1A4, PLAT, ITPR3, EGFR, SYT7, NISCH, RELN, SLC6A9, CDH1, IL1B, RPS6KA1, MBP, SLC29A1, GIT1, NTSR1, DLGAP4
GO:0007268~chemical synaptic transmission	24	5.6872	0.0204321	UNC13B, RAB3B, CAMK2B, CHRM3, CYFIP1, SLC12A4, EGR2, WNT7A, SLC1A4, PLAT, ITPR3, EGFR, SYT7, NISCH, RELN, SLC6A9, CDH1, IL1B, RPS6KA1, MBP, SLC29A1, GIT1, NTSR1, DLGAP4
GO:0051208~sequestering of calcium ion	8	1.89573	0.0205124	LETM1, DIAPH1, CEMIP, FLNA, ITPR3, SLC8B1, NTSR1, TPCN1
GO:0032386~regulation of intracellular transport	19	4.50237	0.0206201	UNC13B, SREBF1, USP36, ABCA2, CYFIP1, CEMIP, IL4R, JUP, SEC16A, WNT7A, RANGAP1, SORL1, SYT7, SHH, CDH1, IL1B, FLNA, PREB, GIT1
GO:1902991~regulation of amyloid precursor protein catabolic process	5	1.18483	0.0206369	ABCA2, FLOT2, CSNK1E, SORL1, ABCG1
GO:0044764~multi-organism cellular process	26	6.16114	0.0207284	ITGB5, MST1R, AUP1, F11R, SLC7A1, EGFR, DAG1, ST3GAL1, LDLR, APOBEC3C, ITGA2, DDX56, IGF2R, TPCN1, PC, POLR3A, SLPI, ATG16L1, AXL, IL1B, MGAT4B, PI4KA, P4HB, ST6GALNAC4, MAP3K14, EPHA2
GO:0044419~interspecies interaction between organisms	27	6.3981	0.0207888	ITGB5, MST1R, AUP1, F11R, SLC7A1, EGFR, DAG1, ST3GAL1, LDLR, APOBEC3C, ITGA2, DDX56, IGF2R, TPCN1, PC, POLR3A, SLPI, ATG16L1, AXL, FASN, IL1B, MGAT4B, PI4KA, P4HB, ST6GALNAC4, MAP3K14, EPHA2
GO:0006469~negative regulation of protein kinase activity	11	2.60664	0.0208364	ZFYVE28, DUSP4, DUSP5, CDKN1A, GPRC5A, IL1B, DNAJA3, PKN1, PTPRH, DUSP8, SORL1
GO:0001889~liver development	9	2.1327	0.0215917	SLC7A5, CPT1A, KRT18, PRKCSH, ITGA2, RPS6KA1, CAD, EGFR, IGF2R
GO:0051223~regulation of protein transport	21	4.9763	0.0216168	UNC13B, SREBF1, USP36, CPT1A, CEMIP, JUP, SEC16A, RANGAP1, SLC8B1, SORL1, EGFR, SYT7, ANO1, SHH, CDH1, IL1B, FLNA, ADAM8, LRRC8A, KCNN4, ABCG1
GO:0018108~peptidyl-tyrosine phosphorylation	15	3.5545	0.0218701	EPHB6, MAP2K3, TNK2, PDGFB, LIF, MST1R, EGFR, VEGFA, ZFYVE28, RELN, GPRC5A, AXL, HSF1, EPHB3, EPHA2
GO:0019752~carboxylic acid metabolic process	31	7.34597	0.0218941	TNXB, SLC2A1, ENO2, ABCC10, ACACB, FADS2, RDH10, VARS2, ST3GAL1, GIT1, OSBPL7, ABCC1, CPT1A, ACSL1, PTGES2, ATP8B1, CAD, GOT2, CPT1C, PLA2G15, FA2H, POR, PC, FASN, CYP2S1, IL1B, OGDH, P4HB, FARSA, MGLL, SLC27A4
GO:0060425~lung morphogenesis	5	1.18483	0.0219768	SHH, RDH10, WNT7B, DAG1, LIF
GO:0010874~regulation of cholesterol efflux	5	1.18483	0.0219768	ABCA2, EEPD1, SHH, ABCA3, ABCG1
GO:1902652~secondary alcohol metabolic process	8	1.89573	0.0220194	SREBF1, POR, MVK, DHCR24, DHCR7, LDLR, ABCG1, NFE2L1
GO:0060485~mesenchyme development	13	3.08057	0.0220647	SEMA7A, NRP2, TNXB, JAG1, SEMA4B, SEMA3B, SHH, ADAM15, RDH10, IL1B, POLR1B, SNAI1, FLNA
GO:0051272~positive regulation of cellular component movement	22	5.21327	0.0220733	MAP2K3, SEMA7A, NRP2, CEMIP, ITGA3, SEMA4B, ITGA2, SEMA3B, PDGFB, WNT7A, EGFR, VEGFA, DIAPH1, CLDN4, RELN, PODXL, IL1B, SNAI1, FLNA, ADAM8, ITGA6, EPHA2
GO:1902668~negative regulation of axon guidance	4	0.947867	0.022104	SEMA7A, SEMA4B, SEMA3B, PLXNA3
GO:0060840~artery development	7	1.65877	0.0222358	SHH, EGR2, JAG1, PDE2A, LDLR, LOXL1, VEGFA
GO:0048545~response to steroid hormone	15	3.5545	0.022785	SREBF1, ABCA2, KMT2D, CDKN1A, ABCA3, WNT7B, CAD, ATP1A3, PLAT, ATP1A1, EGFR, POR, CLDN4, MBP, PKN1
GO:0080135~regulation of cellular response to stress	27	6.3981	0.0229021	OTUB2, TNXB, TNFRSF11A, PTPRF, EGFR, USP19, NPAS2, BAG6, HSF1, FLNA, BAK1, ZBTB7B, SLC25A23, TRAP1, WFS1, WNT7B, SYVN1, WNT7A, TRAF1, VEGFA, LETM1, IL1B, SNAI1, HYOU1, PKN1, P4HB, CERS2
GO:1990138~neuron projection extension	9	2.1327	0.0229743	CYFIP1, SEMA7A, NRP2, CDH1, LAMB2, SEMA4B, SEMA3B, PLXNA3, VEGFA
GO:0015850~organic hydroxy compound transport	13	3.08057	0.0230541	RAB3B, ABCC3, ABCA2, OSBPL7, ATP8B1, ABCA3, SYT7, NISCH, EEPD1, SHH, LDLR, ABCG1, OSBP2
GO:0018212~peptidyl-tyrosine modification	15	3.5545	0.0233047	EPHB6, MAP2K3, TNK2, PDGFB, LIF, MST1R, EGFR, VEGFA, ZFYVE28, RELN, GPRC5A, AXL, HSF1, EPHB3, EPHA2
GO:0032103~positive regulation of response to external stimulus	15	3.5545	0.0233047	ABCC1, ITGA2, PDE2A, PDGFB, PLAT, TNFRSF11A, EGFR, VEGFA, MN1, THBD, IL1B, FLNA, ADAM8, LDLR, TGM2
GO:0010543~regulation of platelet activation	5	1.18483	0.0233687	THBD, PDGFB, CD9, FLNA, F11R
GO:0021604~cranial nerve structural organization	3	0.7109	0.023438	EGR2, NRP2, PLXNA3
GO:0043589~skin morphogenesis	3	0.7109	0.023438	ITGB4, ITGA2, ITGA6
GO:0014013~regulation of gliogenesis	8	1.89573	0.0236015	SLC7A5, SHH, EGR2, IL1B, DAG1, LIF, EGFR, CERS2
GO:0061008~hepaticobiliary system development	9	2.1327	0.0236885	SLC7A5, CPT1A, KRT18, PRKCSH, ITGA2, RPS6KA1, CAD, EGFR, IGF2R
GO:0050729~positive regulation of inflammatory response	9	2.1327	0.0236885	ABCC1, IL1B, ITGA2, PDE2A, ADAM8, TNFRSF11A, LDLR, EGFR, TGM2
GO:0032367~intracellular cholesterol transport	4	0.947867	0.024115	ABCA2, LDLR, ABCG1, SYT7
GO:0010669~epithelial structure maintenance	4	0.947867	0.024115	MUC2, SLC22A5, TFF2, TFF1
GO:1903708~positive regulation of hemopoiesis	11	2.60664	0.0243044	SHH, JAG1, IL4R, AXL, IL1B, HSF1, LIF, SOX13, AP3D1, ADAM8, ZBTB7B
GO:0060341~regulation of cellular localization	31	7.34597	0.0243122	RAB3B, USP36, CYFIP1, CEMIP, EGFR, SHH, CDH1, FLNA, BAK1, GIT1, NTSR1, UNC13B, SREBF1, ABCA2, IL4R, JUP, ITGA3, SEC16A, LIF, WNT7A, CSNK1E, RANGAP1, SORL1, SYT7, VEGFA, DIAPH1, ANO1, IL1B, PREB, ABCG1, EPHA2
GO:0071396~cellular response to lipid	22	5.21327	0.0245029	MAP2K3, SREBF1, KMT2D, OSBPL7, CPT1A, WNT7B, ITGA2, ATP1A3, PLAT, ATP1A1, EGFR, MN1, SLC7A5, ADAM15, AXL, IL1B, HSF1, DAG1, PKN1, LDLR, GIT1, NFE2L1
GO:0051047~positive regulation of secretion	14	3.31754	0.0245533	UNC13B, IL4R, TNFRSF11A, SORL1, EGFR, SYT7, ANO1, IL1B, P2RY2, ADAM8, LRRC8A, KCNN4, ABCG1, NTSR1
GO:0007160~cell-matrix adhesion	11	2.60664	0.0247687	JAG1, TNXB, JUP, ITGB5, ADAM15, ITGA3, ITGB4, ITGA2, DAG1, ITGA6, VEGFA
GO:0048729~tissue morphogenesis	22	5.21327	0.0248317	NRP2, JAG1, ITGB4, ITGA3, WNT7B, ITGA2, LIF, SHROOM3, WNT7A, CELSR2, EGFR, VEGFA, SHH, FRAS1, PODXL, RDH10, DAG1, SNAI1, PLXNB2, FLNA, TGM2, EPHA2
GO:0005975~carbohydrate metabolic process	22	5.21327	0.0248317	PYGB, CPT1A, BRAT1, PDGFB, SLC2A1, SYNJ2, ENO2, ACACB, SLC39A14, NISCH, GALE, PC, MAN2A2, HECTD4, GRB10, OGDH, B3GNT3, HAS3, TFF1, ST6GALNAC4, GIT1, NTSR1
GO:0003158~endothelium development	8	1.89573	0.0252602	JAG1, IL1B, FASN, WNT7B, PDE2A, WNT7A, F11R, VEGFA
GO:0007586~digestion	8	1.89573	0.0252602	CHRM3, MUC2, SLC22A5, TFF2, TFF1, F11R, KCNN4, LDLR
GO:0009913~epidermal cell differentiation	11	2.60664	0.0255056	FA2H, KRT81, KRT80, JAG1, FLNB, KRT86, KRT75, PPL, EVPL, EPHA2, FOSL2
GO:2000021~regulation of ion homeostasis	11	2.60664	0.0255056	LETM1, DIAPH1, CEMIP, AP3D1, FLNA, ITPR3, BAK1, SLC25A23, SLC8B1, NTSR1, TPCN1
GO:0051090~regulation of sequence-specific DNA binding transcription factor activity	17	4.02844	0.0256654	JUP, WFS1, TRAF1, TRAPPC9, TNFRSF11A, VEGFA, SHH, RELN, STK36, IL1B, DNAJA3, HSF1, BHLHE40, FLNA, FLOT2, ADAM8, NTSR1
GO:0031345~negative regulation of cell projection organization	10	2.36967	0.025687	SEMA7A, CDH1, ITGA3, SEMA4B, SEMA3B, FLNA, MBP, NGEF, CERS2, PLXNA3
GO:0071214~cellular response to abiotic stimulus	14	3.31754	0.0261494	CDKN1A, ITGA2, PDE2A, SLC2A1, TNFRSF10A, ATP1A1, F11R, EGFR, IL1B, HSF1, DAG1, TNKS1BP1, BAK1, MAP3K14
GO:0007435~salivary gland morphogenesis	4	0.947867	0.0262215	SHH, DAG1, EGFR, TGM2
GO:0021602~cranial nerve morphogenesis	4	0.947867	0.0262215	EGR2, NRP2, ATP8B1, PLXNA3
GO:0021795~cerebral cortex cell migration	5	1.18483	0.0263099	SUN1, NRP2, RELN, EGFR, PLXNA3
GO:0034205~beta-amyloid formation	5	1.18483	0.0263099	ABCA2, PSEN2, CSNK1E, SORL1, ABCG1
GO:0032844~regulation of homeostatic process	19	4.50237	0.027071	ACD, CEMIP, SLC22A5, AP3D1, ITPR3, TNFRSF11A, SLC8B1, EGFR, TPCN1, LETM1, DIAPH1, ANO1, IL1B, FLNA, ADAM8, BAK1, SLC25A23, ABCG1, NTSR1
GO:0032270~positive regulation of cellular protein metabolic process	48	11.3744	0.027329	POMT2, BCAR3, CDKN1A, SEMA7A, CEMIP, TNXB, BRAT1, PDGFB, MST1R, TNFRSF11A, ADRB2, CAMKK1, EGFR, AKAP12, RELN, HSF1, DAG1, TNKS1BP1, MBP, BAK1, ZBTB7B, CTSD, LDLR, MAP2K3, SREBF1, ABCA2, DUSP5, OSBPL7, ACSL1, WFS1, TNK2, ITGA2, WNT7B, LIF, WNT7A, TNFRSF10A, TRAF1, CSNK1E, VEGFA, CLDN4, GPRC5A, DNAJA3, IL1B, MYH9, PLXNB2, ADAM8, PKN1, GPRC5C
GO:0071712~ER-associated misfolded protein catabolic process	3	0.7109	0.027335	POMT2, BAG6, AUP1
GO:0021800~cerebral cortex tangential migration	3	0.7109	0.027335	NRP2, RELN, PLXNA3
GO:0097475~motor neuron migration	3	0.7109	0.027335	RELN, CELSR2, VEGFA
GO:0042541~hemoglobin biosynthetic process	3	0.7109	0.027335	SLC25A37, ALAS1, SLC6A9
GO:0009437~carnitine metabolic process	3	0.7109	0.027335	POR, CPT1A, CPT1C
GO:0030656~regulation of vitamin metabolic process	3	0.7109	0.027335	RDH10, IL1B, SNAI1
GO:0070254~mucus secretion	3	0.7109	0.027335	ANO1, P2RY2, EGFR
GO:1903039~positive regulation of leukocyte cell-cell adhesion	12	2.8436	0.0273535	EPHB6, CCDC88B, SHH, IL4R, IL1B, DNAJA3, SOX13, AP3D1, FLOT2, ADAM8, ZBTB7B, SLC7A1
GO:0007162~negative regulation of cell adhesion	13	3.08057	0.0273818	IL4R, JAG1, VEGFA, SHH, ADAM15, CDH1, PODXL, PLXNA2, CD9, PLXNB2, MBP, ZBTB7B, PLXNA3
GO:0015807~L-amino acid transport	6	1.4218	0.027485	SLC7A5, SLC7A6, SLC6A9, SLC1A4, SLC7A1, NTSR1
GO:0001934~positive regulation of protein phosphorylation	32	7.58294	0.0275974	BCAR3, CDKN1A, SEMA7A, CEMIP, TNXB, BRAT1, PDGFB, MST1R, TNFRSF11A, ADRB2, CAMKK1, EGFR, AKAP12, RELN, HSF1, DAG1, TNKS1BP1, MAP2K3, DUSP5, ACSL1, TNK2, WNT7B, LIF, WNT7A, TNFRSF10A, TRAF1, VEGFA, GPRC5A, IL1B, ADAM8, PKN1, GPRC5C
GO:0010883~regulation of lipid storage	5	1.18483	0.02786	ASXL1, SREBF1, CPT1A, ACACB, ABCG1
GO:0006022~aminoglycan metabolic process	8	1.89573	0.0278951	CEMIP, CHPF2, IL1B, PDGFB, B3GNT3, HAS3, ST3GAL1, SGSH
GO:0001676~long-chain fatty acid metabolic process	7	1.65877	0.0280731	FADS2, CPT1A, ACSL1, PTGES2, CYP2S1, MGLL, SLC27A4
GO:0050867~positive regulation of cell activation	18	4.2654	0.0282607	EPHB6, CDKN1A, IL4R, SOX13, AP3D1, F11R, SLC7A1, CCDC88B, SHH, AXL, IL1B, DNAJA3, RPS6KA1, FLNA, FLOT2, ADAM8, ZBTB7B, ZNF335
GO:0070723~response to cholesterol	4	0.947867	0.0284235	ABCA2, OSBPL7, DAG1, NFE2L1
GO:0006929~substrate-dependent cell migration	4	0.947867	0.0284235	NRP2, ITGA2, ADAM8, PLXNA3
GO:0022414~reproductive process	45	10.6635	0.0287154	KMT2D, ITGB4, EHMT2, PDGFB, SLC2A1, PLAT, MST1R, SLC4A2, TOB2, ENO2, ADCY7, EGFR, BAG6, THBD, SHH, RDH10, FLNA, LRRC8A, BAK1, UNC13B, SUN1, PRMT7, IL4R, PAQR5, ITGA3, ITGA2, WNT7B, CBX2, CAD, GOT2, LIF, WNT7A, DHCR24, IGF2R, VEGFA, ADAM19, CLDN4, ADAM15, AXL, POLR1B, IL1B, SNAI1, MYH9, CD9, OSBP2
GO:0031424~keratinization	6	1.4218	0.0287376	KRT81, KRT80, KRT86, KRT75, PPL, EVPL
GO:0050801~ion homeostasis	28	6.63507	0.0287631	STEAP3, CEMIP, ATP1A3, ITPR3, ATP1A1, SLC4A2, EGFR, P2RY2, CCRL2, ATP6V0A2, FLNA, BAK1, SLC25A23, NTSR1, TGM2, SLC12A4, WFS1, ABCA3, AP3D1, TRPV3, SLC8B1, SLC39A14, TPCN1, LETM1, DIAPH1, SLC25A37, CYB561, ABCG1
GO:0051345~positive regulation of hydrolase activity	22	5.21327	0.0289639	BCAR3, RGS16, ITGA2, ARHGAP27, F11R, RANGAP1, SIPA1L3, EGFR, VEGFA, CLDN4, DNAJA3, HSF1, ITGA6, MBP, BAK1, RAPGEF5, CTSD, RALGDS, NGEF, TGM2, EPHA2, SLC27A4
GO:0051209~release of sequestered calcium ion into cytosol	7	1.65877	0.0291352	LETM1, CEMIP, FLNA, ITPR3, SLC8B1, NTSR1, TPCN1
GO:0006821~chloride transport	7	1.65877	0.0291352	CLCN7, CLCN6, ANO1, SLC12A4, CLDN4, LRRC8A, SLC1A4
GO:0007566~embryo implantation	5	1.18483	0.0294633	ITGB4, IL1B, POLR1B, LIF, VEGFA
GO:0000003~reproduction	45	10.6635	0.0295946	KMT2D, ITGB4, EHMT2, PDGFB, SLC2A1, PLAT, MST1R, SLC4A2, TOB2, ENO2, ADCY7, EGFR, BAG6, THBD, SHH, RDH10, FLNA, LRRC8A, BAK1, UNC13B, SUN1, PRMT7, IL4R, PAQR5, ITGA3, ITGA2, WNT7B, CBX2, CAD, GOT2, LIF, WNT7A, DHCR24, IGF2R, VEGFA, ADAM19, CLDN4, ADAM15, AXL, POLR1B, IL1B, SNAI1, MYH9, CD9, OSBP2
GO:0036465~synaptic vesicle recycling	6	1.4218	0.0300258	CYFIP1, AP3D1, WNT7A, SYNJ2, GIT1, SYT7
GO:0045833~negative regulation of lipid metabolic process	7	1.65877	0.0302235	ABCA2, IL1B, PDGFB, SNAI1, ATP1A1, ACACB, SORL1
GO:0051283~negative regulation of sequestering of calcium ion	7	1.65877	0.0302235	LETM1, CEMIP, FLNA, ITPR3, SLC8B1, NTSR1, TPCN1
GO:0014044~Schwann cell development	4	0.947867	0.0307205	FA2H, LAMB2, ITGB4, DAG1
GO:0007431~salivary gland development	4	0.947867	0.0307205	SHH, DAG1, EGFR, TGM2
GO:2000191~regulation of fatty acid transport	4	0.947867	0.0307205	ACSL1, IL1B, TNFRSF11A, NTSR1
GO:0008015~blood circulation	19	4.50237	0.0308742	MAP2K3, SREBF1, CHRM3, JUP, PDE2A, PDGFB, ATP1A3, ADRB2, ATP1A1, F11R, EGFR, GRIP2, VEGFA, NISCH, AKAP12, P2RY2, FLNA, E2F4, NTSR1
GO:1903829~positive regulation of cellular protein localization	14	3.31754	0.0311134	USP36, CEMIP, JUP, ITGA3, SEC16A, LIF, SORL1, EGFR, VEGFA, SHH, CDH1, IL1B, FLNA, EPHA2
GO:0001755~neural crest cell migration	5	1.18483	0.0311203	SEMA7A, SHH, NRP2, SEMA4B, SEMA3B
GO:0006508~proteolysis	50	11.8483	0.0313536	POMT2, USP36, RNPEPL1, PLAT, AUP1, PCSK7, THBD, SHH, RPS6KA1, DAG1, CAPN1, CTSD, TGM2, SERPINB1, USP2, CSNK1E, ADAM19, POR, CLDN4, ADAM15, SLPI, WDR81, IL1B, MYH9, ADAM8, ST6GALNAC4, OTUB2, PSEN2, UBR4, USP19, BAG6, RELN, DPP9, HSF1, MBP, BAK1, ST3GAL1, ABCA2, OSBPL7, SERPIND1, WFS1, SYVN1, DHCR24, SORL1, VEGFA, ASXL1, DNAJA3, MGAT4B, UBA1, P4HB
GO:0032940~secretion by cell	27	6.3981	0.0314143	RAB3B, STEAP3, TNFAIP2, EGFR, MILR1, LRRC8A, KCNN4, GIT1, NTSR1, UNC13B, SREBF1, CPT1A, IL4R, LIF, WNT7A, SLC8B1, SORL1, SYT7, NISCH, ANO1, AXL, IL1B, EXOC3, MYH9, PREB, ADAM8, ABCG1
GO:0070307~lens fiber cell development	3	0.7109	0.031472	WNT7B, WNT7A, EPHA2
GO:1902001~fatty acid transmembrane transport	3	0.7109	0.031472	CPT1A, ACSL1, SLC2A1
GO:0090316~positive regulation of intracellular protein transport	9	2.1327	0.0315193	USP36, SHH, CEMIP, JUP, CDH1, IL1B, SEC16A, FLNA, SORL1
GO:0072073~kidney epithelium development	8	1.89573	0.0316901	ASXL1, SHH, JAG1, LAMB2, PODXL, WNT7B, LIF, VEGFA
GO:0061387~regulation of extent of cell growth	7	1.65877	0.032479	CYFIP1, SEMA7A, CDH1, SEMA4B, SEMA3B, PLXNA3, VEGFA
GO:0016125~sterol metabolic process	8	1.89573	0.0326902	SREBF1, POR, MVK, DHCR24, DHCR7, LDLR, ABCG1, NFE2L1
GO:1900076~regulation of cellular response to insulin stimulus	6	1.4218	0.0327098	IL1B, GRB10, ZBTB7B, CTSD, SORL1, SLC27A4
GO:0050772~positive regulation of axonogenesis	6	1.4218	0.0327098	CYFIP1, SEMA7A, PLXNA2, PLXNB2, PLXNA3, VEGFA
GO:0050865~regulation of cell activation	24	5.6872	0.0328178	EPHB6, CDKN1A, IL4R, PDGFB, SOX13, AP3D1, F11R, SLC7A1, CCDC88B, MILR1, THBD, SHH, AXL, IL1B, DNAJA3, RPS6KA1, CD9, FLNA, FLOT2, ADAM8, PKN1, ZBTB7B, ZNF335, LDLR
GO:0048146~positive regulation of fibroblast proliferation	5	1.18483	0.0328311	CDKN1A, PDGFB, LIF, EGFR, FOSL2
GO:0030224~monocyte differentiation	4	0.947867	0.0331121	FASN, PDE2A, MYH9, VEGFA
GO:0001894~tissue homeostasis	11	2.60664	0.0332753	MUC2, SLC22A5, ABCA3, SLC2A1, TFF2, ADAM8, TFF1, TNFRSF11A, ADRB2, EGFR, VEGFA
GO:0035108~limb morphogenesis	8	1.89573	0.0337112	FBN2, ACD, SHH, FRAS1, RDH10, PLXNA2, WNT7A, BAK1
GO:0035107~appendage morphogenesis	8	1.89573	0.0337112	FBN2, ACD, SHH, FRAS1, RDH10, PLXNA2, WNT7A, BAK1
GO:0009790~embryo development	33	7.81991	0.0339637	FBN2, NRP2, ITGB5, ITGB4, PDGFB, EGFR, SHH, SH3PXD2A, RDH10, DAG1, PLXNA2, MBP, POLE, DUSP4, DUSP5, ACD, JAG1, ITGA3, ITGA2, WNT7B, LIF, SHROOM3, WNT7A, VEGFA, FRAS1, POLR1B, SNAI1, COL8A1, MYH9, PLXNB2, ZNF335, SEC24C, EPHA2
GO:0032388~positive regulation of intracellular transport	11	2.60664	0.0339925	UNC13B, USP36, SHH, CEMIP, IL4R, JUP, CDH1, IL1B, SEC16A, FLNA, SORL1
GO:0007267~cell-cell signaling	45	10.6635	0.0340687	RAB3B, CAMK2B, CYFIP1, CHRM3, SEMA3B, PDGFB, PLAT, SLC1A4, ITPR3, TNFRSF11A, CELSR2, EGFR, SHH, RELN, CDH1, RPS6KA1, DAG1, GRB10, FLNA, LRRC8A, MBP, PCDH1, GIT1, NTSR1, DLGAP4, UNC13B, SREBF1, CPT1A, SLC12A4, EGR2, JUP, WNT7B, LIF, SOX13, WNT7A, CSNK1E, SLC8B1, SYT7, NISCH, ANO1, SLC6A9, IL1B, CCDC88C, SLC29A1, ABCG1
GO:1901135~carbohydrate derivative metabolic process	36	8.53081	0.0347095	POMT2, CEMIP, PRKCSH, GALNT18, PDGFB, ADRB2, ENO2, ADCY7, GALNT10, HS6ST3, SGSH, MAN2A2, UAP1L1, HAS3, CYC1, SLC25A23, ST3GAL1, SLC25A25, GIT1, APOBEC3C, ABCA2, GALNT6, CHPF2, PDE2A, CAD, SYVN1, AMPD2, COQ9, FA2H, IL1B, MGAT4B, B3GNT3, OGDH, TKT, ST6GALNAC4, EPHA2
GO:0002790~peptide secretion	16	3.79147	0.0351496	UNC13B, RAB3B, SREBF1, STEAP3, CPT1A, SLC8B1, SORL1, EGFR, SYT7, ANO1, IL1B, PREB, ADAM8, LRRC8A, KCNN4, ABCG1
GO:0032366~intracellular sterol transport	4	0.947867	0.0355978	ABCA2, LDLR, ABCG1, SYT7
GO:0031329~regulation of cellular catabolic process	24	5.6872	0.0357581	SREBF1, USP36, ABCA2, OSBPL7, CPT1A, EHMT2, CSNK1E, ADRB2, ACACB, SORL1, USP19, TPCN1, BAG6, SLC7A5, SHH, ATG16L1, IL1B, HSF1, ATP6V0A2, PKP1, ADAM8, QSOX1, CAPN1, LDLR
GO:1902287~semaphorin-plexin signaling pathway involved in axon guidance	3	0.7109	0.0358377	PLXNA2, PLXNB2, PLXNA3
GO:0071285~cellular response to lithium ion	3	0.7109	0.0358377	SHH, CDH1, ADCY7
GO:0045582~positive regulation of T cell differentiation	7	1.65877	0.0360628	SHH, IL4R, IL1B, SOX13, AP3D1, ADAM8, ZBTB7B
GO:0003013~circulatory system process	19	4.50237	0.0361428	MAP2K3, SREBF1, CHRM3, JUP, PDE2A, PDGFB, ATP1A3, ADRB2, ATP1A1, F11R, EGFR, GRIP2, VEGFA, NISCH, AKAP12, P2RY2, FLNA, E2F4, NTSR1
GO:0070059~intrinsic apoptotic signaling pathway in response to endoplasmic reticulum stress	5	1.18483	0.0364148	BAG6, WFS1, SYVN1, HYOU1, BAK1
GO:0009894~regulation of catabolic process	28	6.63507	0.0365292	USP36, EHMT2, ADRB2, ACACB, EGFR, USP19, BAG6, SHH, CDH1, HSF1, ATP6V0A2, FLNA, QSOX1, CAPN1, LDLR, GIT1, SREBF1, ABCA2, OSBPL7, CPT1A, CSNK1E, SORL1, TPCN1, SLC7A5, ATG16L1, IL1B, PKP1, ADAM8
GO:0001503~ossification	16	3.79147	0.0367188	FBN2, SEMA7A, SUN1, JAG1, WNT7B, FHL2, TNFRSF11A, ADRB2, TOB2, EGFR, MN1, SHH, FASN, SNAI1, GIT1, EPHA2
GO:0031330~negative regulation of cellular catabolic process	10	2.36967	0.0368001	BAG6, USP36, SLC7A5, SHH, EHMT2, PKP1, QSOX1, ACACB, SORL1, USP19
GO:0032870~cellular response to hormone stimulus	21	4.9763	0.0368023	BCAR3, SREBF1, KMT2D, CYFIP1, ACSL1, ATP1A3, PLAT, ATP1A1, RANGAP1, SLC39A14, SORL1, EGFR, POR, EEF2K, IL1B, HSF1, GRB10, PKN1, ZBTB7B, CTSD, SLC27A4
GO:0090087~regulation of peptide transport	21	4.9763	0.0368712	UNC13B, SREBF1, USP36, CPT1A, CEMIP, JUP, SEC16A, RANGAP1, SLC8B1, SORL1, EGFR, SYT7, ANO1, SHH, CDH1, IL1B, FLNA, ADAM8, LRRC8A, KCNN4, ABCG1
GO:0046889~positive regulation of lipid biosynthetic process	6	1.4218	0.0370083	SREBF1, POR, RDH10, IL1B, LDLR, ABCG1
GO:0048678~response to axon injury	6	1.4218	0.0370083	LAMB2, AXL, DAG1, FLNA, RANGAP1, CERS2
GO:0002791~regulation of peptide secretion	13	3.08057	0.0370874	UNC13B, SREBF1, CPT1A, SLC8B1, SORL1, EGFR, SYT7, ANO1, IL1B, ADAM8, LRRC8A, KCNN4, ABCG1
GO:0030301~cholesterol transport	7	1.65877	0.0373115	ABCA2, EEPD1, SHH, ABCA3, LDLR, ABCG1, SYT7
GO:0044070~regulation of anion transport	7	1.65877	0.0373115	SLC7A5, ACSL1, ATP8B1, IL1B, ABCA3, TNFRSF11A, NTSR1
GO:0006066~alcohol metabolic process	13	3.08057	0.0378108	SREBF1, ABCA2, MVK, DHCR24, SYNJ2, POR, RDH10, IL1B, DHCR7, LDLR, NFE2L1, ABCG1, NTSR1
GO:0033673~negative regulation of kinase activity	11	2.60664	0.0380109	ZFYVE28, DUSP4, DUSP5, CDKN1A, GPRC5A, IL1B, DNAJA3, PKN1, PTPRH, DUSP8, SORL1
GO:2000026~regulation of multicellular organismal development	59	13.981	0.0381114	CYFIP1, SLC4A2, F11R, CELSR2, PTPRF, SHH, EEF2K, CDH1, DAG1, EPHB3, TGM2, ZHX2, IL4R, ITGA3, DDX56, SOX13, CSNK1E, SLC7A5, POR, IL1B, ITGA6, ADAM8, NGEF, CERS2, EPHA2, FBN2, CAMK2B, SEMA7A, TNXB, SEMA3B, PDGFB, ADRB2, TOB2, ACACB, EGFR, USP19, BAG6, RELN, HSF1, PLXNA2, FLNA, MBP, ZBTB7B, PLXNA3, EGR2, JAG1, JUP, SEMA4B, LIF, AP3D1, WNT7A, SORL1, VEGFA, AXL, BHLHE40, SNAI1, PLXNB2, ZNF335, NFE2L1
GO:0045940~positive regulation of steroid metabolic process	4	0.947867	0.0381769	SREBF1, POR, IL1B, ABCG1
GO:0006901~vesicle coating	4	0.947867	0.0381769	SEC16A, AP3D1, PREB, TRAPPC9
GO:0044788~modulation by host of viral process	5	1.18483	0.0382878	PC, FASN, DDX56, PI4KA, IGF2R
GO:0034767~positive regulation of ion transmembrane transport	9	2.1327	0.038357	SLC7A5, CEMIP, RELN, SLC6A9, ACSL1, FLNA, ADRB2, KCNN4, NTSR1
GO:0050866~negative regulation of cell activation	10	2.36967	0.0385347	MILR1, THBD, SHH, IL4R, AXL, PDGFB, CD9, PKN1, ZBTB7B, LDLR
GO:0048640~negative regulation of developmental growth	7	1.65877	0.0385876	CDKN1A, SEMA7A, CDH1, SEMA4B, SEMA3B, ADRB2, PLXNA3
GO:0046434~organophosphate catabolic process	8	1.89573	0.0391344	PLA2G15, PDE2A, ENTPD6, SYNJ2, PNPLA6, LDLR, NTSR1, PLBD2
GO:0040007~growth	29	6.87204	0.0393337	KMT2D, CYFIP1, CDKN1A, SEMA7A, NRP2, BRAT1, EHMT2, SEMA3B, ADRB2, JADE2, ACACB, EGFR, SHH, CDH1, RDH10, RPS6KA1, DAG1, SLC25A25, PLXNA3, SPTBN2, LAMB2, WFS1, SEMA4B, WNT7B, WNT7A, VEGFA, POR, ADAM15, CD9
GO:0009056~catabolic process	66	15.6398	0.0394262	POMT2, USP36, PYGB, ITGB4, EHMT2, AUP1, ENO2, SGSH, EDC4, SHH, CDH1, TNKS1BP1, QSOX1, CAPN1, CTSD, GIT1, SREBF1, ABCC1, CPT1A, ZHX2, ACSL1, USP2, ENTPD6, CSNK1E, CPT1C, PLA2G15, SLC7A5, POR, ADAM15, WDR81, IL1B, PKP1, ADAM8, MGLL, PLBD2, SLC27A4, CEMIP, UBR4, DENND3, ADRB2, ACACB, EGFR, USP19, BAG6, HSF1, ATP6V0A2, FLNA, LDLR, NTSR1, APOBEC3C, ABCA2, OSBPL7, WFS1, SEC16A, PDE2A, GOT2, SYVN1, SYNJ…
GO:0055065~metal ion homeostasis	23	5.45024	0.039524	SLC12A4, STEAP3, CEMIP, WFS1, TRPV3, ATP1A3, ITPR3, ATP1A1, SLC8B1, SLC39A14, EGFR, TPCN1, LETM1, DIAPH1, SLC25A37, CCRL2, ATP6V0A2, FLNA, BAK1, SLC25A23, CYB561, NTSR1, TGM2
GO:0043408~regulation of MAPK cascade	24	5.6872	0.0395509	MAP2K3, DUSP4, BCAR3, DUSP5, SEMA7A, TNXB, WNT7B, PDGFB, LIF, WNT7A, MST1R, TRAF1, TNFRSF11A, ADRB2, DUSP8, SORL1, EGFR, VEGFA, AKAP12, IL1B, DAG1, ADAM8, PKN1, EPHA2
GO:0048813~dendrite morphogenesis	7	1.65877	0.0398912	CAMK2B, EEF2K, RELN, WNT7A, CELSR2, NGEF, EPHB3
GO:0018277~protein deamination	2	0.473934	0.0399396	LOXL1, TGM2
GO:0099093~mitochondrial calcium release	2	0.473934	0.0399396	LETM1, SLC8B1
GO:0051238~sequestering of metal ion	8	1.89573	0.0402836	LETM1, DIAPH1, CEMIP, FLNA, ITPR3, SLC8B1, NTSR1, TPCN1
GO:0097553~calcium ion transmembrane import into cytosol	8	1.89573	0.0402836	LETM1, CEMIP, TRPV3, FLNA, ITPR3, SLC8B1, NTSR1, TPCN1
GO:1902656~calcium ion import into cytosol	8	1.89573	0.0402836	LETM1, CEMIP, TRPV3, FLNA, ITPR3, SLC8B1, NTSR1, TPCN1
GO:0016570~histone modification	18	4.2654	0.0404019	OTUB2, SREBF1, USP36, KMT2D, PRMT7, EHMT2, KMT2B, LIF, HR, JADE2, VEGFA, ASXL1, MED24, IL1B, PKN1, ZBTB7B, ZNF335, TGM2
GO:0033089~positive regulation of T cell differentiation in thymus	3	0.7109	0.0404213	SHH, IL1B, ADAM8
GO:0090205~positive regulation of cholesterol metabolic process	3	0.7109	0.0404213	SREBF1, POR, ABCG1
GO:1903131~mononuclear cell differentiation	4	0.947867	0.0408487	FASN, PDE2A, MYH9, VEGFA
GO:0036314~response to sterol	4	0.947867	0.0408487	ABCA2, OSBPL7, DAG1, NFE2L1
GO:0030212~hyaluronan metabolic process	4	0.947867	0.0408487	CEMIP, IL1B, PDGFB, HAS3
GO:0022612~gland morphogenesis	7	1.65877	0.0412224	SHH, RPS6KA1, DAG1, CAPN1, EGFR, EPHA2, TGM2
GO:0032147~activation of protein kinase activity	11	2.60664	0.0414624	MAP2K3, DUSP5, GPRC5A, WNT7B, PDGFB, TNFRSF10A, PKN1, ADRB2, GPRC5C, EGFR, VEGFA
GO:0051046~regulation of secretion	22	5.21327	0.0414786	UNC13B, RAB3B, SREBF1, CPT1A, IL4R, LIF, WNT7A, TNFRSF11A, SLC8B1, SORL1, EGFR, SYT7, ANO1, IL1B, P2RY2, TFF2, ADAM8, LRRC8A, KCNN4, GIT1, ABCG1, NTSR1
GO:0031346~positive regulation of cell projection organization	15	3.5545	0.0416328	CAMK2B, CYFIP1, SEMA7A, ITGA3, ITGA2, DDX56, VEGFA, EEF2K, RELN, CDC42EP3, PLXNA2, PLXNB2, FLNA, ITGA6, PLXNA3
GO:0055082~cellular chemical homeostasis	27	6.3981	0.0421947	CEMIP, ATP1A3, ITPR3, ATP1A1, SLC4A2, P2RY2, CCRL2, ATP6V0A2, FLNA, LRRC8A, BAK1, SLC25A23, NTSR1, TGM2, UNC13B, ABCA2, WFS1, TRPV3, SLC8B1, SLC39A14, TPCN1, LETM1, DIAPH1, ANO1, SLC29A1, CYB561, ABCG1
GO:0002573~myeloid leukocyte differentiation	10	2.36967	0.0425957	SH3PXD2A, FASN, HSF1, PDE2A, LIF, MYH9, TNFRSF11A, TOB2, EPHA2, VEGFA
GO:0050714~positive regulation of protein secretion	8	1.89573	0.0426474	UNC13B, ANO1, ADAM8, LRRC8A, KCNN4, SORL1, ABCG1, EGFR
GO:1902532~negative regulation of intracellular signal transduction	20	4.73934	0.043208	MAP2K3, DUSP4, TRAP1, DUSP5, DGKD, WFS1, ITGA3, PDE2A, FHL2, LIF, SYVN1, DUSP8, SORL1, IL1B, DNAJA3, RPS6KA1, DAG1, SNAI1, HYOU1, EPHA2
GO:0070588~calcium ion transmembrane transport	13	3.08057	0.043281	CEMIP, AHNAK, TRPV3, ITPR3, SLC8B1, TPCN1, LETM1, DIAPH1, SEC61A1, FLNA, SLC25A23, SLC25A25, NTSR1
GO:0048593~camera-type eye morphogenesis	7	1.65877	0.0439681	BCAR3, ZHX2, JAG1, COL8A1, BAK1, EPHA2, VEGFA
GO:0030162~regulation of proteolysis	24	5.6872	0.0439837	ABCA2, OSBPL7, SERPINB1, SERPIND1, PLAT, DHCR24, CSNK1E, SORL1, USP19, VEGFA, BAG6, SHH, POR, CLDN4, SLPI, IL1B, DNAJA3, HSF1, RPS6KA1, MYH9, ADAM8, MBP, BAK1, CTSD
GO:0033344~cholesterol efflux	5	1.18483	0.0442326	ABCA2, EEPD1, SHH, ABCA3, ABCG1
GO:0031102~neuron projection regeneration	5	1.18483	0.0442326	LAMB2, DAG1, FLNA, PTPRF, CERS2
GO:0050435~beta-amyloid metabolic process	5	1.18483	0.0442326	ABCA2, PSEN2, CSNK1E, SORL1, ABCG1
GO:0034764~positive regulation of transmembrane transport	9	2.1327	0.0446549	SLC7A5, CEMIP, RELN, SLC6A9, ACSL1, FLNA, ADRB2, KCNN4, NTSR1
GO:1903035~negative regulation of response to wounding	6	1.4218	0.0449101	THBD, CDKN1A, PDGFB, CD9, PLAT, CERS2
GO:1901550~regulation of endothelial cell development	3	0.7109	0.0452123	IL1B, F11R, VEGFA
GO:0020027~hemoglobin metabolic process	3	0.7109	0.0452123	SLC25A37, ALAS1, SLC6A9
GO:0021783~preganglionic parasympathetic fiber development	3	0.7109	0.0452123	EGR2, NRP2, PLXNA3
GO:1903140~regulation of establishment of endothelial barrier	3	0.7109	0.0452123	IL1B, F11R, VEGFA
GO:0006577~amino-acid betaine metabolic process	3	0.7109	0.0452123	POR, CPT1A, CPT1C
GO:0031399~regulation of protein modification process	52	12.3223	0.0460772	POMT2, BCAR3, CDKN1A, EHMT2, PTPRH, ZFYVE28, AKAP12, EEF2K, DAG1, TNKS1BP1, CNPPD1, DUSP4, MAP2K3, DUSP5, SREBF1, ACSL1, TRAF1, DUSP8, GPRC5A, IL1B, ADAM8, GPRC5C, EPHA2, OTUB2, SEMA7A, CEMIP, TNXB, BRAT1, PDGFB, MST1R, ADRB2, TNFRSF11A, CAMKK1, EGFR, RELN, HSF1, BAK1, ZBTB7B, ABCA2, WFS1, WNT7B, TNK2, LIF, WNT7A, TNFRSF10A, SORL1, VEGFA, DNAJA3, CCDC88C, PLXNB2, PKN1, ZNF335
GO:0099601~regulation of neurotransmitter receptor activity	5	1.18483	0.0463227	RELN, SLC6A9, CAPN1, ADRB2, DLGAP4
GO:0015909~long-chain fatty acid transport	5	1.18483	0.0463227	CPT1A, ACSL1, SLC2A1, NTSR1, SLC27A4
GO:0051640~organelle localization	21	4.9763	0.0465108	UNC13B, CYFIP1, SUN1, CLUH, IL4R, BRAT1, SEC16A, PSEN2, AP3D1, WNT7A, SYNJ2, TRAPPC9, SYT7, MILR1, TMEM201, PLXNA2, EXOC3, MYH9, PREB, ESYT1, GIT1
GO:0090303~positive regulation of wound healing	6	1.4218	0.0466023	THBD, CLDN4, AHNAK, FLNA, PLAT, F11R
GO:0009968~negative regulation of signal transduction	38	9.00474	0.0466423	FBN2, SLC35F6, DGKD, RGS16, FHL2, ADRB2, EGFR, ZFYVE28, SHH, RPS6KA1, DAG1, GRB10, BAK1, MAP2K3, DUSP4, TRAP1, DUSP5, ITGA3, WFS1, PDE2A, LIF, SYVN1, SOX13, CSNK1E, DUSP8, SORL1, ASXL1, TSPAN15, GPRC5A, SLC6A9, DNAJA3, IL1B, CCDC88C, SNAI1, ITGA6, HYOU1, EPHA2, SLC27A4
GO:0090407~organophosphate biosynthetic process	20	4.73934	0.0479155	VAC14, ABCA2, PDXK, PCYT2, DGKD, MVK, DGKA, CAD, PDGFB, AMPD2, SYNJ2, NMNAT2, ADRB2, ADCY7, AGPAT3, PTDSS2, PI4KA, TKT, NTSR1, CDS2
GO:0016042~lipid catabolic process	13	3.08057	0.0484435	CPT1A, AUP1, ADRB2, CPT1C, ACACB, SORL1, PLA2G15, IL1B, PNPLA6, LDLR, PLBD2, MGLL, SLC27A4
GO:0002009~morphogenesis of an epithelium	18	4.2654	0.0489153	JAG1, WNT7B, LIF, SHROOM3, WNT7A, CELSR2, EGFR, VEGFA, SHH, FRAS1, PODXL, RDH10, DAG1, SNAI1, PLXNB2, FLNA, TGM2, EPHA2
GO:0051592~response to calcium ion	8	1.89573	0.048944	EEF2K, S100A16, CPNE7, ENTPD6, ITPR3, SLC25A23, EGFR, SYT7
GO:0048592~eye morphogenesis	8	1.89573	0.048944	FBN2, BCAR3, ZHX2, JAG1, COL8A1, BAK1, EPHA2, VEGFA
GO:0001764~neuron migration	8	1.89573	0.048944	NRP2, RELN, ITGA3, AXL, FLNA, CELSR2, PLXNA3, VEGFA
GO:0071229~cellular response to acid chemical	10	2.36967	0.049564	SREBF1, SLC7A5, CPT1A, WNT7B, HSF1, PDGFB, ATP1A3, LDLR, EGFR, VEGFA

## Sheet: GO_DOWN_dTAM_KDM1A
GO_Down_dTAM_KDM1Ai	Count	%	PValue	Genes
GO:0071840~cellular component organization or biogenesis	174	51.3274	4.59057e-10	NCKAP1, NDUFA12, UBXN2A, SMC6, IL1RAP, FNBP1L, SNRPD2, CFL2, PEG10, AKT3, NBN, HMCN1, B2M, HMGN3, PRKACB, TMSB10, MAP3K7, HMGN1, DYNC2H1, SH3GLB1, EPHA5, EPHA7, LMO4, SCAF11, CIRBP, UBE2E1, DDX10, VRK1, ACSL4, ANK3, KCTD3, SUB1, HECW2, COL4A6, SNRPG, PHIP, SNRPF, ASF1A, PFN2, ENY2, MTMR2, DCUN1D5, YTHDC1, DDX1, ARL3, RHOBTB3, TWIST1, TWF1, HTATSF1, RTN4, RPF1, HSP90B1, CAMSAP2, MYL12B, SNX3, FXR1…
GO:0006996~organelle organization	120	35.3982	9.59388e-10	NCKAP1, NDUFA12, UBXN2A, SMC6, FNBP1L, CFL2, AKT3, NBN, HMCN1, HMGN3, TMSB10, MAP3K7, HMGN1, DYNC2H1, SH3GLB1, EPHA5, CIRBP, UBE2E1, VRK1, ANK3, SUB1, HECW2, PHIP, ASF1A, PFN2, ENY2, DDX1, ARL3, RHOBTB3, TWIST1, TWF1, RTN4, HSP90B1, CAMSAP2, SNX3, SCFD1, RAD21, TPR, DHX36, SNX7, MPDZ, MAP9, CNTLN, S100A10, SRPK2, OSBPL8, CBX3, CAV2, VTA1, CAV1, SMARCA5, BRAF, LARP4, SMARCA1, CYLD, CCDC88A, CHMP2B…
GO:0016043~cellular component organization	169	49.8525	1.36407e-09	NCKAP1, NDUFA12, UBXN2A, SMC6, IL1RAP, FNBP1L, SNRPD2, CFL2, PEG10, AKT3, NBN, HMCN1, B2M, HMGN3, PRKACB, TMSB10, MAP3K7, HMGN1, DYNC2H1, SH3GLB1, EPHA5, EPHA7, LMO4, SCAF11, CIRBP, UBE2E1, VRK1, ACSL4, ANK3, KCTD3, SUB1, HECW2, COL4A6, SNRPG, PHIP, SNRPF, ASF1A, PFN2, ENY2, MTMR2, DCUN1D5, YTHDC1, DDX1, ARL3, RHOBTB3, TWIST1, TWF1, HTATSF1, RTN4, HSP90B1, CAMSAP2, MYL12B, SNX3, FXR1, SCFD1, SNX2…
GO:0051128~regulation of cellular component organization	89	26.2537	5.77414e-09	ITGB1, NCKAP1, BMPR2, WASL, SMC6, IL1RAP, FNBP1L, ROBO1, UBL5, NIPBL, TUBA1A, CFL2, ITGAV, NBN, SPDL1, ATP7A, B2M, TMSB10, SCYL2, PRMT6, SH3GLB1, EPHA5, USP47, EPHA7, ANXA1, LMO4, CKAP2, ACSL4, DYNLL1, WDR35, RASA1, SUB1, HECW2, POT1, PHIP, PFDN4, BIRC2, ASF1A, SDCCAG8, PFN2, CAMK2D, MTMR2, LEPROT, DCUN1D5, ROCK1, ARL3, RHOBTB3, TWIST1, TWF1, ADD3, RTN4, CAMSAP2, MYL12B, SNX3, FXR1, SCFD1, PALMD,…
GO:0022607~cellular component assembly	93	27.4336	3.88576e-08	ITGB1, NCKAP1, NDUFA12, UBXN2A, HMGB2, PSIP1, WASL, PTPRK, IL1RAP, FNBP1L, TUBA1A, SNRPD2, CFL2, PEG10, AP3S1, NBN, ATP7A, IFT57, B2M, CEP290, PRKACB, TMSB10, SH3GLB1, DYNC2H1, EPHA7, SCAF11, LMO4, CIRBP, NDUFC1, ANK3, KCTD3, DYNLL1, WDR35, RASA1, SUB1, SNRPG, POT1, EXOC5, SNRPF, BIRC2, ASF1A, SDCCAG8, PFN2, MTMR2, ROCK1, YTHDC1, ARL3, NDUFB4, DDX1, NDUFB3, TWIST1, TWF1, HTATSF1, ADD3, RTN4, HSP9…
GO:0044085~cellular component biogenesis	98	28.9086	6.75928e-08	NCKAP1, NDUFA12, UBXN2A, IL1RAP, FNBP1L, SNRPD2, CFL2, PEG10, NBN, B2M, PRKACB, TMSB10, DYNC2H1, SH3GLB1, EPHA7, LMO4, SCAF11, CIRBP, DDX10, ANK3, KCTD3, SUB1, SNRPG, SNRPF, ASF1A, PFN2, MTMR2, YTHDC1, DDX1, ARL3, TWIST1, TWF1, HTATSF1, RTN4, RPF1, HSP90B1, CAMSAP2, FXR1, SCFD1, RAD21, TPR, DHX36, LPXN, SNX7, MAP9, S100A10, SRPK2, CBX3, CAV2, VTA1, CAV1, SMARCA5, BRAF, TBCA, ARHGAP24, CYLD, CCDC8…
GO:0044093~positive regulation of molecular function	59	17.4041	1.10029e-07	ITGB1, BMPR2, USP33, HMGB2, IL1RAP, ROBO1, NIPBL, NBN, ATP7A, IFT57, B2M, MAP3K7, HMGN1, EPHA5, EPHA7, PPP1R12A, LMO4, ARID5B, EDF1, ANK3, DYNLL1, WDR35, TGFBR2, DBF4, STIM2, RASA1, SUB1, CAT, POT1, PFN2, SP100, BEX1, DCUN1D5, ROCK1, TWIST1, NTS, TANK, UACA, IFI16, RAB11FIP2, PAK2, ZC3H15, S100A10, OSBPL8, CAV2, CAV1, VEGFC, ARHGAP24, SOD1, CCDC88A, ETAA1, ZNF618, GNAQ, HNRNPA2B1, SERINC1, EIF3E,…
GO:0019222~regulation of metabolic process	172	50.7375	1.25759e-07	UBXN2A, SMC6, IL1RAP, HERC5, RPS6KA6, SESN3, ZNF329, ZNF326, NBN, HMGN3, PRKACB, MAP3K7, SOX4, HMGN1, SH3GLB1, EPHA5, EPHA7, LMO4, CIRBP, CASK, ARID5B, ANK3, RFX7, SUB1, HECW2, GUF1, ZNF711, PHIP, ZFPM2, CGGBP1, ASF1A, PFN2, ENY2, MTMR2, BEX1, DCUN1D5, YTHDC1, GPR87, DDX1, CREM, TWIST1, TWF1, VPS26A, NTS, HTATSF1, RTN4, HSP90B1, SNX3, FXR1, SCFD1, RAD21, TPR, DHX36, SNX7, S100A10, SRPK2, OSBPL8, …
GO:0065009~regulation of molecular function	92	27.1386	1.71957e-07	ITGB1, BMPR2, USP33, HMGB2, WASL, IL1RAP, ROBO1, HERC5, UFL1, NIPBL, PHACTR2, ITGAV, NBN, ATP7A, IFT57, B2M, MAP3K7, HMGN1, PRMT6, EPHA5, USP47, EPHA7, ANXA1, PPP1R12A, ARHGEF12, LMO4, ARID5B, EDF1, ANK3, DYNLL1, WDR35, TGFBR2, ACAP2, RAP2B, DBF4, STIM2, RASA1, SUB1, HECW2, CAT, TAX1BP1, POT1, BIRC2, PFN2, SP100, CAMK2D, BEX1, DCUN1D5, ROCK1, GPR87, NLRC5, TWIST1, NTS, HDAC9, TANK, UACA, RNF2, HS…
GO:0033043~regulation of organelle organization	53	15.6342	2.16823e-07	NCKAP1, WASL, SMC6, UBL5, NIPBL, CFL2, NBN, SPDL1, TMSB10, PRMT6, SH3GLB1, EPHA5, ANXA1, CKAP2, DYNLL1, WDR35, RASA1, SUB1, HECW2, POT1, PHIP, ASF1A, SDCCAG8, PFN2, CAMK2D, LEPROT, ROCK1, ARL3, RHOBTB3, TWIST1, TWF1, ADD3, CAMSAP2, SCFD1, RAD21, TPR, DHX36, SNX7, PAK2, MPDZ, MAP9, S100A10, ATF7IP, CAV2, SMARCA5, BRAF, CYLD, CCDC88A, HNRNPA2B1, CHMP2B, TOMM7, MNAT1, PAM
GO:0031323~regulation of cellular metabolic process	162	47.7876	2.83689e-07	UBXN2A, SMC6, IL1RAP, HERC5, RPS6KA6, SESN3, ZNF329, ZNF326, NBN, HMGN3, MAP3K7, SOX4, HMGN1, SH3GLB1, EPHA5, EPHA7, LMO4, CIRBP, CASK, ARID5B, RFX7, SUB1, GUF1, ZNF711, PHIP, ZFPM2, CGGBP1, ASF1A, PFN2, ENY2, MTMR2, BEX1, DCUN1D5, YTHDC1, GPR87, DDX1, CREM, TWIST1, TWF1, VPS26A, NTS, HTATSF1, RTN4, HSP90B1, FXR1, SCFD1, RAD21, TPR, DHX36, SNX7, S100A10, SRPK2, OSBPL8, CBX3, CAV2, CAV1, SMARCA5, …
GO:0051641~cellular localization	87	25.6637	3.32154e-07	ITGB1, BMPR2, TNFAIP6, NDUFA12, WASL, PTPRK, FNBP1L, SYNE1, UBL5, NIPBL, TUBA1A, RSRC1, AP3S1, SPDL1, TNPO1, IL13RA2, IFT57, CEP290, TMSB10, HMGN3, SCYL2, SH3GLB1, DYNC2H1, EPHA5, PPP1R12A, CASK, NDUFC1, ANK3, DYNLL1, WDR35, POT1, EXOC5, ERGIC2, FTL, PFN2, DYNC1I2, SP100, CAMK2D, MTMR2, LEPROT, ENY2, STXBP3, ROCK1, ZDHHC20, YTHDC1, ARL3, NDUFB4, DDX1, NDUFB3, RHOBTB3, TWF1, VPS26A, RTN4, HSP90B1,…
GO:0060255~regulation of macromolecule metabolic process	160	47.1976	5.88133e-07	UBXN2A, SMC6, IL1RAP, HERC5, RPS6KA6, ZNF329, ZNF326, NBN, HMGN3, PRKACB, MAP3K7, SOX4, HMGN1, EPHA5, EPHA7, LMO4, CIRBP, CASK, ARID5B, ANK3, RFX7, SUB1, HECW2, GUF1, ZNF711, PHIP, ZFPM2, CGGBP1, ASF1A, PFN2, ENY2, MTMR2, BEX1, DCUN1D5, YTHDC1, DDX1, CREM, TWIST1, TWF1, NTS, HTATSF1, RTN4, HSP90B1, SNX3, FXR1, RAD21, TPR, DHX36, S100A10, SRPK2, OSBPL8, CBX3, CAV2, CAV1, SMARCA5, NR2F1, CDC7, BRAF…
GO:0080090~regulation of primary metabolic process	158	46.6077	7.39113e-07	UBXN2A, SMC6, IL1RAP, HERC5, RPS6KA6, ZNF329, ZNF326, NBN, HMGN3, PRKACB, MAP3K7, SOX4, HMGN1, EPHA5, EPHA7, LMO4, CIRBP, CASK, ARID5B, RFX7, SUB1, HECW2, GUF1, ZNF711, PHIP, ZFPM2, CGGBP1, ASF1A, PFN2, ENY2, MTMR2, BEX1, DCUN1D5, YTHDC1, GPR87, DDX1, CREM, TWIST1, TWF1, NTS, HTATSF1, RTN4, HSP90B1, SNX3, FXR1, RAD21, TPR, DHX36, S100A10, SRPK2, OSBPL8, CBX3, CAV2, CAV1, SMARCA5, NR2F1, CDC7, BRA…
GO:0048522~positive regulation of cellular process	141	41.5929	1.10186e-06	NCKAP1, SMC6, IL1RAP, FNBP1L, SESN3, CFL2, AKT3, NBN, B2M, HMGN3, MAP3K7, SOX4, RPS12, HMGN1, DYNC2H1, SH3GLB1, EPHA5, EPHA7, LMO4, CIRBP, CASK, ARID5B, ACSL4, ANK3, SUB1, GUF1, ZNF711, PHIP, ZFPM2, ASF1A, PFN2, ENY2, MTMR2, BEX1, DCUN1D5, DDX1, ARL3, CREM, TWIST1, TWF1, NTS, RTN4, SNX3, FXR1, RAD21, TPR, DHX36, RAB11FIP2, SNX7, S100A10, SRPK2, OSBPL8, CAV2, CAV1, SMARCA5, NR2F1, CDC7, BRAF, LARP…
GO:0044237~cellular metabolic process	240	70.7965	1.17571e-06	SMC6, FNBP1L, RPL9, HERC5, RPS6KA6, SNRPD2, RPL36AL, AKT3, PRKACB, SOX4, RPS12, EPHA5, EPHA7, SCAF11, CIRBP, DDX10, ACSL4, RFX7, SUB1, HECW2, GUF1, ZNF711, ZFPM2, ASF1A, CGGBP1, PFN2, MTMR2, BEX1, DCUN1D5, TWIST1, TWF1, VPS26A, HTATSF1, FXR1, SCFD1, RAD21, DHX36, SNX7, TRMT1L, S100A10, SRPK2, RPL41, SMARCA5, NR2F1, CDC7, BRAF, LARP4, SMARCA1, PBX1, DERA, CYLD, CCDC88A, PKIA, REL, RAD17, RPS20, PA…
GO:0000278~mitotic cell cycle	38	11.2094	1.20424e-06	ITGB1, ROCK1, ARL3, RNF2, NIPBL, TUBA1A, RAD21, TPR, NBN, SPDL1, AZI2, SOX4, MAP9, USP47, CDKN2B, CDKN2C, ANXA1, PPP1R12A, CAV2, FBXL17, SMARCA5, CKAP2, VRK1, CDC7, ANK3, PBX1, NEDD1, DBF4, PKIA, RASA1, HECW2, CHMP2B, RAD17, PKN2, PHIP, EXOC5, MNAT1, PAM
GO:0008104~protein localization	77	22.7139	1.22513e-06	ITGB1, BMPR2, TNFAIP6, WASL, PTPRK, SYNE1, UBL5, NIPBL, TUBA1A, AP3S1, SPDL1, TNPO1, IFT57, CEP290, TMSB10, HMGN3, SOX4, SH3GLB1, DYNC2H1, EPHA5, ANXA1, ACSL4, ANK3, DYNLL1, WDR35, POT1, EXOC5, SP100, LEPROT, ENY2, STXBP3, ROCK1, ZDHHC20, YTHDC1, ARL3, DDX1, TWF1, VPS26A, RTN4, HSP90B1, SNX3, SCFD1, SNX2, RAD21, TPR, EMC2, CHML, SNX7, RAB11FIP2, GBP1, ANKRD50, S100A10, CNTLN, OSBPL8, TMEM30A, SSB…
GO:0046907~intracellular transport	58	17.1091	1.28653e-06	BMPR2, NDUFA12, WASL, FNBP1L, UBL5, TUBA1A, RSRC1, AP3S1, TNPO1, IL13RA2, IFT57, CEP290, SCYL2, SH3GLB1, DYNC2H1, PPP1R12A, CASK, NDUFC1, ANK3, DYNLL1, WDR35, ERGIC2, PFN2, DYNC1I2, SP100, MTMR2, LEPROT, ENY2, STXBP3, ROCK1, ZDHHC20, YTHDC1, ARL3, NDUFB4, NDUFB3, RHOBTB3, VPS26A, HSP90B1, SNX3, SCFD1, SNX2, TPR, CHML, TMEM30A, SSB, NDUFA5, LCA5, NDUFA1, BRAF, SOD1, CCDC88A, APPBP2, PKIA, HNRNPA2B…
GO:0051129~negative regulation of cellular component organization	36	10.6195	1.30362e-06	MTMR2, ROCK1, TWIST1, TWF1, WASL, ADD3, RTN4, CAMSAP2, SNX3, SCFD1, RAD21, TPR, ITGAV, NBN, SPDL1, PAK2, GBP1, TMSB10, B2M, PRMT6, EPHA7, LMO4, CAV1, SMARCA5, CKAP2, NR2F1, ARHGAP24, SUB1, POT1, GOPC, PFDN4, MNAT1, BIRC2, ASF1A, PFN2, PICALM
GO:0044260~cellular macromolecule metabolic process	207	61.0619	1.40501e-06	SMC6, RPL9, HERC5, RPS6KA6, SNRPD2, RPL36AL, AKT3, PRKACB, SOX4, RPS12, EPHA5, EPHA7, SCAF11, CIRBP, DDX10, RFX7, SUB1, HECW2, GUF1, ZNF711, ZFPM2, ASF1A, CGGBP1, PFN2, MTMR2, BEX1, DCUN1D5, TWIST1, TWF1, HTATSF1, FXR1, RAD21, DHX36, TRMT1L, S100A10, SRPK2, RPL41, SMARCA5, NR2F1, CDC7, BRAF, LARP4, SMARCA1, PBX1, CYLD, CCDC88A, PKIA, REL, RAD17, RPS20, PAM, RPS24, DZIP3, CPEB4, PHF3, TOP2B, GBE1,…
GO:0070727~cellular macromolecule localization	62	18.2891	1.73581e-06	ITGB1, BMPR2, TNFAIP6, WASL, PTPRK, SYNE1, UBL5, NIPBL, TUBA1A, AP3S1, SPDL1, TNPO1, IFT57, CEP290, TMSB10, SH3GLB1, DYNC2H1, ANK3, DYNLL1, WDR35, POT1, EXOC5, SP100, LEPROT, ENY2, STXBP3, ROCK1, ZDHHC20, YTHDC1, ARL3, DDX1, TWF1, VPS26A, RTN4, HSP90B1, SCFD1, SNX2, RAD21, TPR, DHX36, EMC2, CHML, RAB11FIP2, GBP1, S100A10, CNTLN, OSBPL8, TMEM30A, SSB, CAV1, LCA5, BRAF, DNAJA1, CCDC88A, NEDD1, APPB…
GO:0043170~macromolecule metabolic process	219	64.6018	2.63796e-06	SMC6, RPL9, HERC5, RPS6KA6, SNRPD2, RPL36AL, AKT3, B2M, PRKACB, SOX4, RPS12, DYNC2H1, EPHA5, EPHA7, SCAF11, CIRBP, DDX10, ANK3, RFX7, SUB1, HECW2, GUF1, ZNF711, ZFPM2, ASF1A, CGGBP1, PFN2, MTMR2, BEX1, DCUN1D5, TWIST1, TWF1, HTATSF1, SNX3, FXR1, RAD21, DHX36, TRMT1L, S100A10, SRPK2, RPL41, SMARCA5, NR2F1, CDC7, BRAF, LARP4, SMARCA1, PBX1, CYLD, CCDC88A, PKIA, REL, RAD17, RPS20, PAM, RPS24, DZIP3,…
GO:0034613~cellular protein localization	61	17.9941	3.02002e-06	ITGB1, BMPR2, TNFAIP6, WASL, PTPRK, SYNE1, UBL5, NIPBL, TUBA1A, AP3S1, SPDL1, TNPO1, IFT57, CEP290, TMSB10, SH3GLB1, DYNC2H1, ANK3, DYNLL1, WDR35, POT1, EXOC5, SP100, LEPROT, ENY2, STXBP3, ROCK1, ZDHHC20, YTHDC1, ARL3, DDX1, TWF1, VPS26A, RTN4, HSP90B1, SCFD1, SNX2, RAD21, TPR, EMC2, CHML, RAB11FIP2, GBP1, S100A10, CNTLN, OSBPL8, TMEM30A, SSB, CAV1, LCA5, BRAF, DNAJA1, CCDC88A, NEDD1, APPBP2, PKI…
GO:0048699~generation of neurons	53	15.6342	3.2518e-06	ITGB1, NCKAP1, TOP2B, BMPR2, USP33, HMGB2, WASL, PTPRK, ROBO1, UFL1, NIPBL, TUBA1A, ATP7A, B2M, CEP290, SCYL2, SOX4, DYNC2H1, EPHA5, EPHA7, LMO4, TCF12, ACSL4, ANK3, ENAH, HECW2, SDCCAG8, MTMR2, ROCK1, ARL3, TWIST1, TWF1, HDAC9, RTN4, CAMSAP2, SNX3, DHX36, PAK2, S100A10, CDKN2B, TMEM30A, NR2F1, VEGFC, BRAF, NAP1L1, SMARCA1, PBX1, SOD1, NELL2, CCDC88A, UQCRQ, TCF4, PICALM
GO:0031325~positive regulation of cellular metabolic process	95	28.0236	4.17286e-06	TOP2B, BMPR2, HMGB2, PSIP1, WASL, ROBO1, UFL1, NIPBL, SESN3, NBN, ATP7A, IFT57, CEP290, MAP3K7, HMGN3, SCYL2, SOX4, HMGN1, SH3GLB1, EPHA5, IL11, SS18, EPHA7, ANXA1, PPP1R12A, LMO4, TCF12, CIRBP, TET2, CKAP2, ARID5B, CASK, EDF1, WDR35, PJA2, TGFBR2, RAP2B, DBF4, TFDP2, SUB1, IRF1, PAX9, GUF1, POT1, ZNF711, PHIP, ZFPM2, BIRC2, ASF1A, PFN2, SP100, ENY2, BEX1, DCUN1D5, ROCK1, NLRC5, CREM, TWIST1, TAN…
GO:0022008~neurogenesis	55	16.2242	5.08878e-06	ITGB1, NCKAP1, TOP2B, BMPR2, USP33, HMGB2, WASL, PTPRK, ROBO1, UFL1, NIPBL, TUBA1A, ATP7A, B2M, CEP290, SCYL2, SOX4, DYNC2H1, EPHA5, EPHA7, ANXA1, LMO4, TCF12, ACSL4, ANK3, ENAH, HECW2, SDCCAG8, MTMR2, ROCK1, ARL3, TWIST1, TWF1, HDAC9, RTN4, CAMSAP2, SNX3, DHX36, PAK2, S100A10, CDKN2B, CDKN2C, TMEM30A, NR2F1, VEGFC, BRAF, NAP1L1, SMARCA1, PBX1, SOD1, NELL2, CCDC88A, UQCRQ, TCF4, PICALM
GO:0007049~cell cycle	55	16.2242	5.08878e-06	ITGB1, TOP2B, USP33, WASL, PTPRK, HERC5, NIPBL, TUBA1A, MIS18BP1, HMCN1, NBN, SPDL1, AZI2, PRKACB, SOX4, LRRCC1, SH3GLB1, USP47, ANXA1, PPP1R12A, TET2, CKAP2, VRK1, ANK3, DBF4, TFDP2, RASA1, HECW2, PHIP, EXOC5, SDCCAG8, ROCK1, ARL3, RNF2, RAD21, TPR, MAP9, SRPK2, CDKN2B, CDKN2C, CAV2, SMARCA5, FBXL17, CDC7, PBX1, CYLD, ETAA1, NEDD1, PKIA, CHMP2B, PDCD4, RAD17, PKN2, MNAT1, PAM
GO:0060341~regulation of cellular localization	38	11.2094	5.64027e-06	ITGB1, MTMR2, SP100, LEPROT, ENY2, CAMK2D, BMPR2, ROCK1, TNFAIP6, RTN4, SNX3, UBL5, SCFD1, NIPBL, TPR, DHX36, IL13RA2, RAB11FIP2, GBP1, HMGN3, CEP290, SH3GLB1, EPHA5, TMEM30A, PPP1R12A, CAV1, CASK, BRAF, ANK3, DYNLL1, DNAJA1, CCDC88A, PKIA, TOMM7, NDUFAF2, GOPC, PFN2, PICALM
GO:0009893~positive regulation of metabolic process	100	29.4985	5.65832e-06	SESN3, NBN, HMGN3, MAP3K7, SOX4, HMGN1, SH3GLB1, EPHA5, EPHA7, LMO4, CIRBP, CASK, ARID5B, ANK3, SUB1, HECW2, GUF1, ZNF711, PHIP, ZFPM2, ASF1A, PFN2, ENY2, BEX1, DCUN1D5, CREM, TWIST1, NTS, FXR1, DHX36, SNX7, S100A10, SRPK2, OSBPL8, CAV2, CAV1, SMARCA5, NR2F1, CDC7, BRAF, LARP4, SMARCA1, PBX1, CCDC88A, SP3, REL, TCF4, TAB2, MNAT1, PICALM, TOP2B, BMPR2, HMGB2, PSIP1, WASL, ROBO1, UFL1, NIPBL, ATP7A…
GO:0019219~regulation of nucleobase-containing compound metabolic process	107	31.5634	5.93967e-06	SMC6, IL1RAP, ZNF329, ZNF326, NBN, HMGN3, MAP3K7, SOX4, HMGN1, EPHA5, LMO4, CIRBP, CASK, ARID5B, RFX7, SUB1, ZNF711, PHIP, ZFPM2, CGGBP1, ASF1A, ENY2, BEX1, YTHDC1, GPR87, CREM, TWIST1, NTS, HTATSF1, FXR1, RAD21, TPR, DHX36, S100A10, SRPK2, CBX3, CAV1, SMARCA5, NR2F1, CDC7, SMARCA1, PBX1, CYLD, CCDC88A, PKIA, SP3, REL, PHF14, RAD17, TCF4, MNAT1, ZNF654, PAM, PICALM, TOP2B, BMPR2, BNC2, TNFAIP6, H…
GO:0032880~regulation of protein localization	36	10.6195	8.59819e-06	ITGB1, SP100, LEPROT, ENY2, BMPR2, TNFAIP6, WASL, RTN4, SNX3, UFL1, UBL5, SCFD1, NIPBL, TPR, RAB11FIP2, GBP1, HMGN3, CEP290, SOX4, SH3GLB1, EPHA5, TMEM30A, ANXA1, VEGFC, ACSL4, ANK3, DYNLL1, DNAJA1, CCDC88A, KIAA0586, PKIA, TOMM7, NDUFAF2, GOPC, PAM, PICALM
GO:0033036~macromolecule localization	82	24.1888	1.35518e-05	ITGB1, BMPR2, TNFAIP6, WASL, PTPRK, SYNE1, UBL5, NIPBL, TUBA1A, PEG10, ITGAV, AP3S1, SPDL1, TNPO1, IFT57, CEP290, TMSB10, HMGN3, SOX4, SH3GLB1, DYNC2H1, EPHA5, ANXA1, ACSL4, ANK3, DYNLL1, WDR35, TGFBR2, POT1, EXOC5, SP100, LEPROT, ENY2, STXBP3, ROCK1, ZDHHC20, YTHDC1, ARL3, DDX1, TWF1, VPS26A, RTN4, HSP90B1, SNX3, SCFD1, SNX2, RAD21, TPR, DHX36, EMC2, IGF2BP3, CHML, SNX7, RAB11FIP2, GBP1, ANKRD50…
GO:0051649~establishment of localization in cell	65	19.174	1.42069e-05	ITGB1, BMPR2, NDUFA12, WASL, FNBP1L, UBL5, TUBA1A, RSRC1, AP3S1, SPDL1, TNPO1, IL13RA2, IFT57, CEP290, SCYL2, SH3GLB1, DYNC2H1, PPP1R12A, CASK, NDUFC1, ANK3, DYNLL1, WDR35, EXOC5, ERGIC2, PFN2, DYNC1I2, SP100, CAMK2D, MTMR2, LEPROT, ENY2, STXBP3, ROCK1, ZDHHC20, YTHDC1, ARL3, NDUFB4, NDUFB3, RHOBTB3, VPS26A, HSP90B1, SNX3, SCFD1, SNX2, TPR, CHML, RAB11FIP2, TMEM30A, SSB, NDUFA5, CAV1, LCA5, NDUFA…
GO:0002181~cytoplasmic translation	13	3.83481	1.44457e-05	RPL41, SSB, RPL35A, RPL9, SH3BGRL, DHX36, RPL37A, RPS20, EIF3E, ZC3H15, RPS24, CPEB4, RPS12
GO:0032392~DNA geometric change	10	2.94985	1.4753e-05	ANXA1, DDX1, SUB1, DHX36, HNRNPA2B1, HMGB2, POT1, NBN, MNAT1, DTD1
GO:0010557~positive regulation of macromolecule biosynthetic process	60	17.6991	1.53784e-05	BMPR2, HMGB2, PSIP1, WASL, NIPBL, CEP290, HMGN3, SOX4, HMGN1, IL11, SS18, PPP1R12A, LMO4, TCF12, CIRBP, TET2, CKAP2, ARID5B, CASK, EDF1, DBF4, TFDP2, SUB1, IRF1, PAX9, GUF1, POT1, ZNF711, PHIP, ZFPM2, BIRC2, ASF1A, SP100, ENY2, BEX1, NLRC5, CREM, TWIST1, FXR1, SH3BGRL, IFI16, DHX36, USP1, HAS2, S100A10, ATF7IP, YTHDF3, SMARCA5, NR2F1, CDC7, SMARCA1, LARP4, PBX1, ASXL3, SP3, HNRNPA2B1, REL, TCF4, …
GO:0008152~metabolic process	248	73.1563	1.63018e-05	SMC6, FNBP1L, RPL9, HERC5, RPS6KA6, SNRPD2, RPL36AL, AKT3, B2M, PRKACB, SOX4, RPS12, DYNC2H1, EPHA5, EPHA7, SCAF11, CIRBP, DDX10, ACSL4, ANK3, RFX7, SUB1, HECW2, GUF1, ZNF711, ZFPM2, ASF1A, CGGBP1, PFN2, MTMR2, BEX1, DCUN1D5, TWIST1, TWF1, VPS26A, HTATSF1, SNX3, FXR1, SCFD1, RAD21, DHX36, SNX7, TRMT1L, S100A10, SRPK2, RPL41, SMARCA5, NR2F1, CDC7, BRAF, LARP4, SMARCA1, PBX1, DERA, CYLD, CCDC88A, P…
GO:0010604~positive regulation of macromolecule metabolic process	92	27.1386	1.63667e-05	TOP2B, BMPR2, HMGB2, PSIP1, WASL, ROBO1, NIPBL, NBN, IFT57, CEP290, MAP3K7, HMGN3, SCYL2, SOX4, HMGN1, IL11, SS18, EPHA7, PPP1R12A, LMO4, TCF12, CIRBP, TET2, CKAP2, ARID5B, CASK, EDF1, ANK3, WDR35, PJA2, TGFBR2, RAP2B, DBF4, TFDP2, SUB1, HECW2, IRF1, PAX9, GUF1, POT1, ZNF711, PHIP, ZFPM2, BIRC2, ASF1A, PFN2, SP100, ENY2, BEX1, DCUN1D5, ROCK1, NLRC5, CREM, TWIST1, NTS, TANK, UACA, FXR1, SH3BGRL, I…
GO:0008380~RNA splicing	22	6.48968	1.8027e-05	SRPK2, YTHDC1, SCAF11, DDX1, CIRBP, PSIP1, ZCRB1, HTATSF1, PTBP3, FXR1, LSM8, UBL5, SNRPD2, RSRC1, ZNF638, HNRNPA2B1, SNRPG, ZNF326, SNRPF, PPIG, HNRNPH3, ZC3H13
GO:0010033~response to organic substance	85	25.0737	2.04534e-05	ITGB1, BMPR2, TNFAIP6, UBXN2A, HMGB2, PTPRK, IL1RAP, ROBO1, UFL1, TUBA1A, SESN3, PEG10, FUNDC1, AP3S1, IL13RA2, UBXN4, ATP7A, AZI2, B2M, PRKACB, MAP3K7, SOX4, ANXA1, TCF12, TET2, ARID5B, CASK, ACSL4, DYNLL1, WDR35, TGFBR2, ACAP2, MMP13, IRF1, CAT, PAX9, COL4A6, PHIP, BIRC2, SP100, LEPROT, ENY2, STXBP3, ROCK1, DDX1, NLRC5, TWIST1, HDAC9, TANK, HSP90B1, GNG2, IFI16, TPR, DHX36, LPXN, HAS2, SHOC2, R…
GO:0030030~cell projection organization	50	14.7493	2.17763e-05	ITGB1, NCKAP1, TOP2B, BMPR2, USP33, WASL, PTPRK, FNBP1L, ROBO1, ATP7A, IFT57, B2M, CEP290, DYNC2H1, EPHA5, EPHA7, LMO4, ACSL4, ANK3, DYNLL1, WDR35, ENAH, HECW2, EXOC5, SDCCAG8, PFN2, MTMR2, ROCK1, ARL3, TWF1, RTN4, CAMSAP2, SNX3, FXR1, SNX2, DHX36, PAK2, TMEM30A, CAV1, LCA5, NR2F1, BRAF, ARHGAP24, SOD1, NELL2, CYLD, CCDC88A, KIAA0586, PKN2, PICALM
GO:1903047~mitotic cell cycle process	31	9.14454	2.24394e-05	ITGB1, ROCK1, ARL3, NIPBL, RAD21, TPR, NBN, SPDL1, SOX4, MAP9, USP47, CDKN2B, CDKN2C, ANXA1, FBXL17, SMARCA5, CKAP2, VRK1, CDC7, ANK3, PBX1, DBF4, PKIA, RASA1, HECW2, CHMP2B, RAD17, PHIP, EXOC5, MNAT1, PAM
GO:0007399~nervous system development	71	20.944	2.35429e-05	ITGB1, NCKAP1, TOP2B, COX7B, BMPR2, USP33, HMGB2, WASL, PTPRK, IL1RAP, ROBO1, UFL1, RPS6KA6, NIPBL, TUBA1A, AKT3, ATP7A, IFT57, B2M, CEP290, PRKACB, SCYL2, SOX4, DYNC2H1, EPHA5, EPHA7, ANXA1, LMO4, TCF12, ACSL4, ANK3, DYNLL1, TGFBR2, ENAH, HECW2, SDCCAG8, MTMR2, BEX1, STXBP3, ROCK1, ARL3, TWIST1, TWF1, HDAC9, RTN4, CAMSAP2, SNX3, DHX36, IGF2BP3, PAK2, S100A10, CDKN2B, CDKN2C, TMEM30A, PCDH9, FBXL…
GO:0051252~regulation of RNA metabolic process	97	28.6136	2.39469e-05	IL1RAP, ZNF329, ZNF326, HMGN3, MAP3K7, SOX4, HMGN1, EPHA5, LMO4, CIRBP, CASK, ARID5B, RFX7, SUB1, ZNF711, PHIP, ZFPM2, CGGBP1, ASF1A, ENY2, BEX1, YTHDC1, CREM, TWIST1, NTS, HTATSF1, FXR1, RAD21, TPR, DHX36, S100A10, SRPK2, CBX3, CAV1, SMARCA5, NR2F1, SMARCA1, PBX1, CYLD, PKIA, SP3, REL, PHF14, TCF4, MNAT1, ZNF654, PAM, PICALM, TOP2B, BMPR2, BNC2, TNFAIP6, HMGB2, PSIP1, WASL, PTPRK, PHF6, UFL1, NI…
GO:0033554~cellular response to stress	60	17.6991	2.42976e-05	BMPR2, USP33, HMGB2, PTPRK, SMC6, UFL1, RPS6KA6, NIPBL, SESN3, AKT3, NBN, UBXN4, ATP7A, B2M, MAP3K7, SOX4, HMGN1, PRMT6, SH3GLB1, USP47, ANXA1, LANCL1, GPX8, VRK1, PJA2, CAT, POT1, ASF1A, SP100, ENY2, DCUN1D5, DDX1, TWIST1, TANK, RTN4, HSP90B1, FXR1, IFI16, RAD21, TPR, DHX36, USP1, HAS2, USP25, CDKN2B, CBX3, CAV1, SMARCA5, BRAF, CDC7, SOD1, DNAJA1, CYLD, ETAA1, TOMM7, REL, PDCD4, RAD17, MNAT1, CP…
GO:0048518~positive regulation of biological process	147	43.3628	2.45671e-05	NCKAP1, SMC6, IL1RAP, FNBP1L, SESN3, CFL2, AKT3, NBN, IL13RA2, B2M, HMGN3, MAP3K7, SOX4, RPS12, HMGN1, DYNC2H1, SH3GLB1, EPHA5, EPHA7, LMO4, CIRBP, CASK, ARID5B, ACSL4, ANK3, STIM2, SUB1, HECW2, GUF1, ZNF711, PHIP, ZFPM2, ASF1A, PFN2, ENY2, MTMR2, BEX1, DCUN1D5, DDX1, ARL3, CREM, TWIST1, TWF1, NTS, RTN4, SNX3, FXR1, RAD21, TPR, DHX36, LPXN, RAB11FIP2, SNX7, S100A10, SRPK2, OSBPL8, CAV2, CAV1, SMA…
GO:0006139~nucleobase-containing compound metabolic process	144	42.4779	2.85849e-05	NDUFA12, SMC6, IL1RAP, SNRPD2, ZNF329, ZNF326, NBN, HMGN3, MAP3K7, SOX4, HMGN1, EPHA5, LMO4, SCAF11, CIRBP, CASK, DDX10, ARID5B, ZCRB1, RFX7, SUB1, SNRPG, ZNF711, PHIP, PPIG, SNRPF, ZFPM2, CGGBP1, ASF1A, ENY2, BEX1, UQCRB, YTHDC1, GPR87, DDX1, CREM, TWIST1, NTS, HTATSF1, RPF1, FXR1, RAD21, TPR, DHX36, LPXN, ZC3H13, TRMT1L, S100A10, SRPK2, CBX3, CAV1, SMARCA5, NR2F1, CDC7, SMARCA1, PBX1, DERA, CYL…
GO:1902580~single-organism cellular localization	38	11.2094	2.86524e-05	ITGB1, DYNC1I2, BMPR2, ROCK1, NDUFA12, ARL3, NDUFB4, NDUFB3, WASL, FNBP1L, TUBA1A, TPR, AP3S1, TNPO1, IL13RA2, IFT57, RAB11FIP2, GBP1, S100A10, DYNC2H1, SSB, NDUFA5, LCA5, NDUFA1, CASK, BRAF, NDUFC1, ANK3, DYNLL1, WDR35, SOD1, CCDC88A, PKIA, TOMM7, GOPC, EXOC5, PFN2, PICALM
GO:0048519~negative regulation of biological process	136	40.118	2.94314e-05	RPS6KA6, SESN3, PEG10, AKT3, NBN, IL13RA2, B2M, PRKACB, TMSB10, SOX4, EPHA7, LMO4, CIRBP, CASK, ARID5B, ACSL4, ANK3, SUB1, HECW2, C18ORF54, PHIP, ZFPM2, CGGBP1, ASF1A, PFN2, ENY2, MTMR2, STXBP3, GPR87, CREM, TWIST1, TWF1, NTS, RTN4, HSP90B1, CAMSAP2, SNX3, FXR1, SCFD1, RAD21, TPR, DHX36, LPXN, SRPK2, OSBPL8, CBX3, CAV2, CAV1, SMARCA5, NR2F1, BRAF, ARHGAP24, PBX1, CYLD, PKIA, GNAQ, SP3, CHMP2B, ND…
GO:0043933~macromolecular complex subunit organization	61	17.9941	3.03902e-05	NCKAP1, NDUFA12, HMGB2, PSIP1, WASL, IL1RAP, TUBA1A, SNRPD2, CFL2, PEG10, AP3S1, ATP7A, B2M, PRKACB, TMSB10, SH3GLB1, SCAF11, LMO4, CIRBP, CKAP2, NDUFC1, KCTD3, RASA1, SUB1, SNRPG, SNRPF, BIRC2, ASF1A, PFN2, YTHDC1, ARL3, NDUFB4, DDX1, NDUFB3, TWIST1, TWF1, HTATSF1, ADD3, RTN4, CAMSAP2, TPR, DHX36, LPXN, ATF7IP, SRPK2, NDUFA5, YTHDF3, VTA1, SMARCA5, NDUFA1, NAP1L1, TBCA, NEDD1, P4HA1, CHMP2B, NDU…
GO:0048523~negative regulation of cellular process	128	37.7581	3.13137e-05	RPS6KA6, SESN3, PEG10, AKT3, NBN, IL13RA2, B2M, PRKACB, TMSB10, SOX4, EPHA7, LMO4, CIRBP, CASK, ARID5B, ANK3, SUB1, C18ORF54, PHIP, ZFPM2, CGGBP1, ASF1A, PFN2, ENY2, MTMR2, STXBP3, GPR87, CREM, TWIST1, TWF1, RTN4, HSP90B1, CAMSAP2, SNX3, FXR1, SCFD1, RAD21, TPR, DHX36, LPXN, SRPK2, OSBPL8, CBX3, CAV2, CAV1, SMARCA5, NR2F1, BRAF, ARHGAP24, PBX1, CYLD, PKIA, GNAQ, SP3, CHMP2B, NDUFAF2, REL, PHF14, …
GO:0051171~regulation of nitrogen compound metabolic process	120	35.3982	3.38502e-05	SMC6, IL1RAP, ZNF329, ZNF326, NBN, HMGN3, MAP3K7, SOX4, HMGN1, EPHA5, LMO4, CIRBP, CASK, ARID5B, RFX7, SUB1, GUF1, ZNF711, PHIP, ZFPM2, CGGBP1, ASF1A, ENY2, BEX1, YTHDC1, GPR87, DDX1, CREM, TWIST1, NTS, HTATSF1, RTN4, FXR1, RAD21, TPR, DHX36, S100A10, SRPK2, CBX3, CAV1, SMARCA5, NR2F1, CDC7, LARP4, SMARCA1, PBX1, CYLD, CCDC88A, PKIA, SP3, REL, PHF14, RAD17, TCF4, MNAT1, ZNF654, PAM, PICALM, CPEB4…
GO:0034641~cellular nitrogen compound metabolic process	167	49.2625	3.38787e-05	NDUFA12, SMC6, IL1RAP, RPL9, SNRPD2, RPL36AL, ZNF329, ZNF326, NBN, HMGN3, MAP3K7, SOX4, RPS12, HMGN1, EPHA5, LMO4, SCAF11, CIRBP, CASK, DDX10, ARID5B, ZCRB1, RFX7, SUB1, GUF1, SNRPG, ZNF711, PHIP, PPIG, SNRPF, ZFPM2, CGGBP1, ASF1A, ENY2, BEX1, UQCRB, YTHDC1, GPR87, DDX1, CREM, TWIST1, NTS, HTATSF1, TRHDE, RTN4, RPF1, FXR1, RAD21, TPR, DHX36, LPXN, ZC3H13, ZC3H15, TRMT1L, S100A10, SRPK2, RPL41, CB…
GO:0051276~chromosome organization	44	12.9794	3.48699e-05	TOP2B, SP100, ENY2, CAMK2D, CHD9, DDX1, HMGB2, TWIST1, SMC6, HDAC9, RNF2, UFL1, NIPBL, RAD21, GATAD1, TPR, DHX36, NBN, SPDL1, DTD1, MAP3K7, HMGN3, HMGN1, PRMT6, ATF7IP, SS18, ANXA1, CBX3, TET2, SMARCA5, UBE2E1, NAP1L1, VRK1, SMARCA1, BRMS1L, SUB1, HECW2, HNRNPA2B1, CHMP2B, PHF14, POT1, MNAT1, PAM, ASF1A
GO:0048856~anatomical structure development	137	40.413	3.54511e-05	NCKAP1, IL1RAP, RPS6KA6, CFL2, AKT3, NBN, AZI2, B2M, PRKACB, SOX4, HMGN1, DYNC2H1, EPHA5, EPHA7, LMO4, MYH15, DDX10, ARID5B, ACSL4, ANK3, HECW2, PHIP, ZFPM2, ASF1A, MTMR2, BEX1, STXBP3, YTHDC1, DDX1, ARL3, RHOBTB3, TWIST1, TWF1, RTN4, CAMSAP2, MYL12B, SNX3, FXR1, SCFD1, SNX2, DHX36, LPXN, S100A10, SRPK2, CAV2, CAV1, NR2F1, BRAF, LARP4, SMARCA1, ARHGAP24, PBX1, CCDC88A, LPAR6, UQCRQ, SP3, PHF14, G…
GO:0034645~cellular macromolecule biosynthetic process	128	37.7581	4.38057e-05	IL1RAP, RPL9, RPL36AL, ZNF329, ZNF326, NBN, HMGN3, MAP3K7, SOX4, RPS12, HMGN1, EPHA5, LMO4, CIRBP, CASK, ARID5B, RFX7, SUB1, GUF1, ZNF711, PHIP, ZFPM2, CGGBP1, ASF1A, ENY2, BEX1, DDX1, CREM, TWIST1, NTS, HTATSF1, FXR1, RAD21, TPR, DHX36, LPXN, ZC3H15, S100A10, RPL41, CBX3, CAV1, SMARCA5, NR2F1, CDC7, LARP4, SMARCA1, PBX1, CYLD, CCDC88A, PKIA, SP3, REL, PHF14, RAD17, TCF4, RPS20, MNAT1, ZNF654, PA…
GO:0043085~positive regulation of catalytic activity	43	12.6844	4.53083e-05	ITGB1, BMPR2, ROCK1, DCUN1D5, HMGB2, TANK, UACA, ROBO1, IFI16, NBN, ATP7A, IFT57, RAB11FIP2, PAK2, MAP3K7, ZC3H15, S100A10, HMGN1, EPHA5, OSBPL8, EPHA7, PPP1R12A, CAV2, LMO4, CAV1, VEGFC, DYNLL1, WDR35, ARHGAP24, TGFBR2, SOD1, ETAA1, CCDC88A, DBF4, GNAQ, RASA1, HNRNPA2B1, POT1, TAB2, SERINC1, MNAT1, PFN2, PICALM
GO:0071310~cellular response to organic substance	69	20.354	4.8341e-05	ITGB1, BMPR2, TNFAIP6, UBXN2A, HMGB2, PTPRK, IL1RAP, ROBO1, UFL1, SESN3, PEG10, AP3S1, IL13RA2, ATP7A, AZI2, B2M, MAP3K7, SOX4, ANXA1, ARID5B, CASK, DYNLL1, WDR35, TGFBR2, ACAP2, IRF1, CAT, PAX9, COL4A6, PHIP, BIRC2, SP100, LEPROT, ENY2, STXBP3, NLRC5, TWIST1, HDAC9, TANK, HSP90B1, GNG2, IFI16, TPR, LPXN, HAS2, SHOC2, RAB11FIP2, PAK2, GBP1, ZC3H15, GBP3, OSBPL8, CDKN2B, YTHDF3, CBX3, CAV2, CAV1, …
GO:0043412~macromolecule modification	102	30.0885	5.04731e-05	UBXN2A, PLOD2, SMC6, HERC5, RPS6KA6, SNRPD2, AKT3, NBN, PRKACB, MAP3K7, SOX4, EPHA5, EPHA7, UBE2E1, CASK, VRK1, HECW2, SNRPG, FKBP7, PHIP, PPIG, SNRPF, PFN2, ENY2, MTMR2, DCUN1D5, TWIST1, TWF1, HSP90B1, FXR1, ZC3H13, TRMT1L, SRPK2, OSBPL8, CAV2, CAV1, SMARCA5, CDC7, BRAF, CYLD, CCDC88A, APPBP2, P4HA1, PKIA, GNAQ, PHF14, TAB2, RPS20, MNAT1, PAM, DZIP3, BMPR2, USP33, PTPN21, PTPRK, ROBO1, UFL1, UBL…
GO:0048869~cellular developmental process	108	31.8584	5.07769e-05	NCKAP1, SMC6, CFL2, PEG10, AKT3, AZI2, B2M, SOX4, DYNC2H1, EPHA5, EPHA7, LMO4, ARID5B, ACSL4, ANK3, HECW2, PHIP, ZFPM2, ASF1A, MTMR2, BEX1, YTHDC1, ARL3, RHOBTB3, CREM, TWIST1, TWF1, RTN4, CAMSAP2, MYL12B, SNX3, FXR1, SCFD1, SNX2, DHX36, LPXN, S100A10, SRPK2, OSBPL8, CAV2, CAV1, NR2F1, BRAF, SMARCA1, ARHGAP24, PBX1, CCDC88A, UQCRQ, SP3, PHF14, TCF4, PICALM, ITGB1, TOP2B, BMPR2, TNFAIP6, USP33, HM…
GO:0009891~positive regulation of biosynthetic process	62	18.2891	5.29106e-05	BMPR2, HMGB2, PSIP1, WASL, NIPBL, ATP7A, CEP290, HMGN3, SOX4, HMGN1, IL11, SS18, ANXA1, PPP1R12A, LMO4, TCF12, CIRBP, TET2, CKAP2, ARID5B, CASK, EDF1, DBF4, TFDP2, SUB1, IRF1, PAX9, GUF1, POT1, ZNF711, PHIP, ZFPM2, BIRC2, ASF1A, SP100, ENY2, BEX1, NLRC5, CREM, TWIST1, FXR1, SH3BGRL, IFI16, DHX36, USP1, HAS2, S100A10, ATF7IP, YTHDF3, SMARCA5, NR2F1, CDC7, SMARCA1, LARP4, PBX1, ASXL3, SP3, HNRNPA2B…
GO:0031328~positive regulation of cellular biosynthetic process	61	17.9941	5.54443e-05	BMPR2, HMGB2, PSIP1, WASL, NIPBL, ATP7A, CEP290, HMGN3, SOX4, HMGN1, IL11, SS18, ANXA1, PPP1R12A, LMO4, TCF12, CIRBP, TET2, CKAP2, ARID5B, CASK, EDF1, DBF4, TFDP2, SUB1, IRF1, PAX9, GUF1, POT1, ZNF711, PHIP, ZFPM2, BIRC2, ASF1A, SP100, ENY2, BEX1, NLRC5, CREM, TWIST1, FXR1, SH3BGRL, IFI16, DHX36, USP1, S100A10, ATF7IP, YTHDF3, SMARCA5, NR2F1, CDC7, SMARCA1, LARP4, PBX1, ASXL3, SP3, HNRNPA2B1, REL…
GO:0070201~regulation of establishment of protein localization	26	7.66962	5.63766e-05	SP100, LEPROT, ENY2, BMPR2, SNX3, UBL5, SCFD1, TPR, HMGN3, CEP290, SOX4, SH3GLB1, EPHA5, TMEM30A, ANXA1, VEGFC, ACSL4, ANK3, DYNLL1, DNAJA1, KIAA0586, PKIA, TOMM7, NDUFAF2, GOPC, PAM
GO:0048468~cell development	64	18.8791	5.73465e-05	ITGB1, NCKAP1, TOP2B, BMPR2, TNFAIP6, USP33, HMGB2, WASL, PTPRK, ROBO1, UFL1, NIPBL, SGCB, CFL2, ITGAV, ATP7A, B2M, CEP290, SCYL2, SOX4, EPHA5, EPHA7, LMO4, TCF12, ARID5B, ACSL4, ANK3, DYNLL1, PTBP3, TGFBR2, ENAH, HECW2, MTMR2, ROCK1, YTHDC1, ARL3, TWIST1, TWF1, HDAC9, RNF2, RTN4, CAMSAP2, SNX3, DHX36, LPXN, HAS2, PAK2, GBP1, S100A10, CDKN2B, TMEM30A, CAV2, NR2F1, VEGFC, BRAF, NAP1L1, PBX1, SOD1,…
GO:0016310~phosphorylation	65	19.174	5.87066e-05	COX7B, BMPR2, NDUFA12, ROBO1, HERC5, RPS6KA6, RSRC1, AKT3, ITGAV, NBN, ATP7A, PRKACB, MAP3K7, SCYL2, EPHA5, IL11, EPHA7, LMO4, CASK, VRK1, NDUFC1, DYNLL1, PJA2, TGFBR2, RAP2B, DBF4, PHIP, PFN2, CAMK2D, ROCK1, UQCRB, NDUFB4, NDUFB3, NLRC5, TWIST1, TWF1, FXR1, RPS6KC1, PAK2, GBP1, SRPK2, OSBPL8, CDKN2B, CDKN2C, NDUFA5, CAV2, CAV1, NDUFA1, VEGFC, BRAF, CDC7, CDC42BPA, SOD1, DNAJA1, CYLD, CCDC88A, ET…
GO:0000902~cell morphogenesis	36	10.6195	5.87537e-05	ITGB1, NCKAP1, TOP2B, BMPR2, ROCK1, USP33, RHOBTB3, WASL, RTN4, ROBO1, MYL12B, SCFD1, SNX2, PALMD, DHX36, HAS2, LPXN, ITGAV, ATP7A, PAK2, GBP1, S100A10, EPHA5, SS18, EPHA7, ANXA1, LMO4, BRAF, ANK3, SOD1, NELL2, ENAH, RASA1, HECW2, PHIP, PICALM
GO:0006807~nitrogen compound metabolic process	173	51.0324	6.25257e-05	NDUFA12, PLOD2, SMC6, IL1RAP, RPL9, SNRPD2, RPL36AL, ZNF329, ZNF326, NBN, HMGN3, MAP3K7, SOX4, RPS12, HMGN1, EPHA5, LMO4, SCAF11, CIRBP, CASK, DDX10, ARID5B, ZCRB1, RFX7, SUB1, GUF1, SNRPG, ZNF711, PHIP, PPIG, SNRPF, ZFPM2, CGGBP1, ASF1A, ENY2, BEX1, UQCRB, YTHDC1, GPR87, DDX1, CREM, TWIST1, NTS, HTATSF1, TRHDE, RTN4, RPF1, FXR1, RAD21, TPR, DHX36, LPXN, ZC3H13, ZC3H15, TRMT1L, S100A10, SRPK2, OS…
GO:0050790~regulation of catalytic activity	68	20.059	6.92004e-05	ITGB1, BMPR2, HMGB2, WASL, ROBO1, HERC5, PHACTR2, NBN, ATP7A, IFT57, MAP3K7, HMGN1, PRMT6, EPHA5, USP47, EPHA7, ANXA1, PPP1R12A, ARHGEF12, LMO4, DYNLL1, WDR35, TGFBR2, ACAP2, RAP2B, DBF4, RASA1, POT1, BIRC2, PFN2, CAMK2D, DCUN1D5, ROCK1, GPR87, NLRC5, HDAC9, TANK, UACA, HSP90B1, IFI16, SHOC2, CHML, RAB11FIP2, PAK2, ZC3H15, S100A10, OSBPL8, CDKN2B, CDKN2C, CAV2, CAV1, VEGFC, ARHGAP24, SOD1, DNAJA1…
GO:0051223~regulation of protein transport	25	7.37463	7.20254e-05	SP100, LEPROT, ENY2, BMPR2, SNX3, UBL5, SCFD1, TPR, HMGN3, CEP290, SOX4, SH3GLB1, EPHA5, TMEM30A, ANXA1, VEGFC, ACSL4, ANK3, DYNLL1, DNAJA1, PKIA, TOMM7, NDUFAF2, GOPC, PAM
GO:0009059~macromolecule biosynthetic process	128	37.7581	7.46224e-05	IL1RAP, RPL9, RPL36AL, ZNF329, ZNF326, NBN, HMGN3, MAP3K7, SOX4, RPS12, HMGN1, EPHA5, LMO4, CIRBP, CASK, ARID5B, RFX7, SUB1, GUF1, ZNF711, PHIP, ZFPM2, CGGBP1, ASF1A, ENY2, BEX1, DDX1, CREM, TWIST1, NTS, HTATSF1, FXR1, RAD21, TPR, DHX36, LPXN, ZC3H15, S100A10, RPL41, CBX3, CAV1, SMARCA5, NR2F1, CDC7, LARP4, SMARCA1, PBX1, CYLD, CCDC88A, PKIA, SP3, REL, PHF14, RAD17, TCF4, RPS20, MNAT1, ZNF654, PA…
GO:0044092~negative regulation of molecular function	40	11.7994	8.17778e-05	SP100, CAMK2D, ROCK1, GPR87, USP33, NLRC5, TWIST1, HDAC9, RNF2, UFL1, IFI16, PHACTR2, ITGAV, PAK2, B2M, PRMT6, USP47, CDKN2B, CDKN2C, ANXA1, PPP1R12A, CAV1, ANK3, DYNLL1, PBX1, DNAJA1, CYLD, PKIA, GNAQ, HECW2, C4ORF3, CAT, PDCD4, TAX1BP1, POT1, RPS20, GOPC, MNAT1, BIRC2, PICALM
GO:0032989~cellular component morphogenesis	38	11.2094	9.02241e-05	ITGB1, NCKAP1, TOP2B, MTMR2, BMPR2, ROCK1, USP33, RHOBTB3, WASL, RTN4, ROBO1, MYL12B, SCFD1, SNX2, PALMD, CFL2, DHX36, HAS2, LPXN, ITGAV, ATP7A, PAK2, GBP1, S100A10, EPHA5, SS18, EPHA7, ANXA1, LMO4, BRAF, ANK3, SOD1, NELL2, ENAH, RASA1, HECW2, PHIP, PICALM
GO:0045184~establishment of protein localization	55	16.2242	9.34973e-05	BMPR2, UBL5, NIPBL, TUBA1A, AP3S1, TNPO1, IFT57, CEP290, HMGN3, SOX4, SH3GLB1, DYNC2H1, EPHA5, ANXA1, ACSL4, ANK3, DYNLL1, WDR35, POT1, EXOC5, SP100, LEPROT, ENY2, STXBP3, ZDHHC20, YTHDC1, ARL3, VPS26A, HSP90B1, SNX3, SCFD1, SNX2, TPR, EMC2, CHML, SNX7, RAB11FIP2, ANKRD50, TMEM30A, SSB, VTA1, CAV1, LCA5, VEGFC, BRAF, KTN1, DNAJA1, APPBP2, PKIA, HNRNPA2B1, CHMP2B, TOMM7, NDUFAF2, GOPC, PAM
GO:0044271~cellular nitrogen compound biosynthetic process	125	36.8732	9.61822e-05	NDUFA12, IL1RAP, RPL9, RPL36AL, ZNF329, ZNF326, HMGN3, MAP3K7, SOX4, RPS12, HMGN1, EPHA5, LMO4, CIRBP, CASK, ARID5B, RFX7, SUB1, GUF1, ZNF711, PHIP, ZFPM2, CGGBP1, ASF1A, ENY2, BEX1, GPR87, DDX1, CREM, TWIST1, NTS, HTATSF1, FXR1, RAD21, TPR, DHX36, LPXN, ZC3H15, S100A10, RPL41, CBX3, CAV1, SMARCA5, NR2F1, LARP4, SMARCA1, PBX1, CYLD, PKIA, SP3, REL, PHF14, TCF4, RPS20, MNAT1, ZNF654, PAM, RPS24, P…
GO:0022402~cell cycle process	40	11.7994	0.000101173	ITGB1, TOP2B, ROCK1, ARL3, USP33, WASL, NIPBL, TUBA1A, RAD21, TPR, NBN, SPDL1, SOX4, MAP9, SH3GLB1, USP47, CDKN2B, CDKN2C, ANXA1, PPP1R12A, CAV2, FBXL17, SMARCA5, CKAP2, VRK1, CDC7, ANK3, PBX1, DBF4, PKIA, RASA1, HECW2, CHMP2B, RAD17, PKN2, PHIP, EXOC5, MNAT1, PAM, SDCCAG8
GO:0006366~transcription from RNA polymerase II promoter	59	17.4041	0.000105865	BMPR2, TNFAIP6, HMGB2, PSIP1, WASL, PHF6, NIPBL, SNAPC3, HMGN3, SOX4, PRMT6, IL11, SS18, PPP1R12A, LMO4, TCF12, TET2, CKAP2, ARID5B, CASK, ZHX1, TFDP2, SUB1, IRF1, PAX9, ZNF711, PHIP, ZFPM2, CGGBP1, SP100, ENY2, BEX1, NLRC5, CREM, TWIST1, HDAC9, RNF2, IFI16, TPR, DHX36, POLR2K, S100A10, ATF7IP, CBX3, CAV1, SMARCA5, NR2F1, SMARCA1, PBX1, ASXL3, PKIA, BRMS1L, SP3, HNRNPA2B1, REL, PHF14, PDCD4, TCF4…
GO:0006928~movement of cell or subcellular component	62	18.2891	0.000113918	ITGB1, NCKAP1, TOP2B, BMPR2, TNFAIP6, USP33, HMGB2, WASL, PTPRK, FNBP1L, ROBO1, NIPBL, TUBA1A, CFL2, AKT3, ITGAV, AP3S1, SPDL1, ATP7A, IFT57, TMSB10, DYNC2H1, EPHA5, EPHA7, ANXA1, LMO4, ARID5B, DYNLL1, WDR35, TGFBR2, ENAH, RAP2B, SDCCAG8, PFN2, DYNC1I2, SP100, CAMK2D, ROCK1, ARL3, RHOBTB3, TWIST1, PRCP, HDAC9, RTN4, LPXN, HAS2, OSBPL8, YTHDF3, CAV1, LCA5, VEGFC, BRAF, CDC42BPA, ARHGAP24, KTN1, SO…
GO:0016070~RNA metabolic process	120	35.3982	0.000115781	IL1RAP, SNRPD2, ZNF329, ZNF326, HMGN3, MAP3K7, SOX4, HMGN1, EPHA5, LMO4, SCAF11, CIRBP, CASK, DDX10, ARID5B, ZCRB1, RFX7, SUB1, SNRPG, ZNF711, PHIP, PPIG, SNRPF, ZFPM2, CGGBP1, ASF1A, ENY2, BEX1, YTHDC1, DDX1, CREM, TWIST1, NTS, HTATSF1, RPF1, FXR1, RAD21, TPR, DHX36, LPXN, ZC3H13, TRMT1L, S100A10, SRPK2, CBX3, CAV1, SMARCA5, NR2F1, SMARCA1, PBX1, CYLD, LSM8, PKIA, SP3, REL, PHF14, TCF4, MNAT1, Z…
GO:0046483~heterocycle metabolic process	144	42.4779	0.000118645	NDUFA12, SMC6, IL1RAP, SNRPD2, ZNF329, ZNF326, NBN, HMGN3, MAP3K7, SOX4, HMGN1, EPHA5, LMO4, SCAF11, CIRBP, CASK, DDX10, ARID5B, ZCRB1, RFX7, SUB1, SNRPG, ZNF711, PHIP, PPIG, SNRPF, ZFPM2, CGGBP1, ASF1A, ENY2, BEX1, UQCRB, YTHDC1, GPR87, DDX1, CREM, TWIST1, NTS, HTATSF1, RPF1, FXR1, RAD21, TPR, DHX36, LPXN, ZC3H13, TRMT1L, S100A10, SRPK2, CBX3, CAV1, SMARCA5, NR2F1, CDC7, SMARCA1, PBX1, DERA, CYL…
GO:0006725~cellular aromatic compound metabolic process	145	42.7729	0.000119933	NDUFA12, SMC6, IL1RAP, SNRPD2, ZNF329, ZNF326, NBN, HMGN3, MAP3K7, SOX4, HMGN1, EPHA5, LMO4, SCAF11, CIRBP, CASK, DDX10, ARID5B, ZCRB1, RFX7, SUB1, SNRPG, ZNF711, PHIP, PPIG, SNRPF, ZFPM2, CGGBP1, ASF1A, ENY2, BEX1, UQCRB, YTHDC1, GPR87, DDX1, CREM, TWIST1, NTS, HTATSF1, RPF1, FXR1, RAD21, TPR, DHX36, LPXN, ZC3H13, TRMT1L, S100A10, SRPK2, CBX3, CAV1, SMARCA5, NR2F1, CDC7, SMARCA1, PBX1, DERA, CYL…
GO:0051173~positive regulation of nitrogen compound metabolic process	62	18.2891	0.000121057	TOP2B, BMPR2, HMGB2, PSIP1, WASL, NIPBL, NBN, CEP290, HMGN3, SOX4, HMGN1, IL11, SS18, PPP1R12A, LMO4, TCF12, CIRBP, TET2, CKAP2, ARID5B, CASK, EDF1, DBF4, TFDP2, SUB1, IRF1, PAX9, GUF1, POT1, ZNF711, PHIP, ZFPM2, BIRC2, ASF1A, SP100, ENY2, BEX1, NLRC5, CREM, TWIST1, FXR1, SH3BGRL, IFI16, DHX36, USP1, HAS2, S100A10, ATF7IP, YTHDF3, SMARCA5, NR2F1, CDC7, SMARCA1, LARP4, PBX1, ASXL3, SP3, HNRNPA2B1,…
GO:0090304~nucleic acid metabolic process	130	38.3481	0.000121973	SMC6, IL1RAP, SNRPD2, ZNF329, ZNF326, NBN, HMGN3, MAP3K7, SOX4, HMGN1, EPHA5, LMO4, SCAF11, CIRBP, CASK, DDX10, ARID5B, ZCRB1, RFX7, SUB1, SNRPG, ZNF711, PHIP, PPIG, SNRPF, ZFPM2, CGGBP1, ASF1A, ENY2, BEX1, YTHDC1, DDX1, CREM, TWIST1, NTS, HTATSF1, RPF1, FXR1, RAD21, TPR, DHX36, LPXN, ZC3H13, TRMT1L, S100A10, SRPK2, CBX3, CAV1, SMARCA5, NR2F1, CDC7, SMARCA1, PBX1, CYLD, CCDC88A, LSM8, PKIA, SP3, …
GO:1902582~single-organism intracellular transport	30	8.84956	0.0001343	DYNC1I2, BMPR2, ROCK1, NDUFA12, ARL3, NDUFB4, NDUFB3, WASL, FNBP1L, TUBA1A, TPR, AP3S1, TNPO1, IL13RA2, IFT57, DYNC2H1, SSB, NDUFA5, LCA5, NDUFA1, CASK, BRAF, NDUFC1, DYNLL1, WDR35, SOD1, PKIA, TOMM7, PFN2, PICALM
GO:0032502~developmental process	144	42.4779	0.000134371	NCKAP1, SMC6, IL1RAP, RPS6KA6, CFL2, PEG10, AKT3, NBN, AZI2, B2M, PRKACB, SOX4, HMGN1, DYNC2H1, EPHA5, EPHA7, LMO4, MYH15, DDX10, ARID5B, ACSL4, ANK3, HECW2, PHIP, ZFPM2, ASF1A, MTMR2, BEX1, STXBP3, YTHDC1, DDX1, ARL3, RHOBTB3, CREM, TWIST1, TWF1, RTN4, CAMSAP2, MYL12B, SNX3, FXR1, SCFD1, SNX2, DHX36, LPXN, ZC3H13, S100A10, SRPK2, OSBPL8, CAV2, CAV1, NR2F1, BRAF, LARP4, SMARCA1, ARHGAP24, PBX1, C…
GO:0051051~negative regulation of transport	23	6.78466	0.00013575	IL11, MTMR2, ENY2, SP100, CAMK2D, ANXA1, STXBP3, CAV1, TWIST1, BRAF, ACSL4, ANK3, SNX3, PKIA, HECW2, C4ORF3, TPR, NDUFAF2, GOPC, ITGAV, IL13RA2, ATP7A, PICALM
GO:0044767~single-organism developmental process	142	41.8879	0.00014307	NCKAP1, SMC6, IL1RAP, RPS6KA6, CFL2, PEG10, AKT3, NBN, AZI2, B2M, PRKACB, SOX4, HMGN1, DYNC2H1, EPHA5, EPHA7, LMO4, MYH15, DDX10, ARID5B, ACSL4, ANK3, HECW2, PHIP, ZFPM2, ASF1A, MTMR2, BEX1, STXBP3, YTHDC1, DDX1, ARL3, RHOBTB3, CREM, TWIST1, TWF1, RTN4, CAMSAP2, MYL12B, SNX3, FXR1, SCFD1, SNX2, DHX36, LPXN, S100A10, SRPK2, OSBPL8, CAV2, CAV1, NR2F1, BRAF, SMARCA1, ARHGAP24, PBX1, CCDC88A, LPAR6, …
GO:0000377~RNA splicing, via transesterification reactions with bulged adenosine as nucleophile	17	5.01475	0.000147284	SRPK2, YTHDC1, SCAF11, DDX1, CIRBP, PSIP1, ZCRB1, HTATSF1, FXR1, LSM8, UBL5, SNRPD2, RSRC1, HNRNPA2B1, SNRPG, SNRPF, HNRNPH3
GO:0000398~mRNA splicing, via spliceosome	17	5.01475	0.000147284	SRPK2, YTHDC1, SCAF11, DDX1, CIRBP, PSIP1, ZCRB1, HTATSF1, FXR1, LSM8, UBL5, SNRPD2, RSRC1, HNRNPA2B1, SNRPG, SNRPF, HNRNPH3
GO:0070887~cellular response to chemical stimulus	79	23.3038	0.000149783	ITGB1, BMPR2, TNFAIP6, UBXN2A, HMGB2, PTPRK, IL1RAP, ROBO1, UFL1, TUBA1A, SESN3, PEG10, AP3S1, IL13RA2, ATP7A, AZI2, B2M, MAP3K7, SOX4, ANXA1, PPP1R12A, LANCL1, GPX8, ARID5B, CASK, ANK3, DYNLL1, WDR35, TGFBR2, ACAP2, IRF1, CAT, PAX9, COL4A6, PHIP, BIRC2, SP100, CAMK2D, LEPROT, ENY2, STXBP3, NLRC5, TWIST1, HDAC9, TANK, RTN4, HSP90B1, GNG2, IFI16, TPR, DHX36, LPXN, HAS2, SHOC2, RAB11FIP2, PAK2, GBP…
GO:0007275~multicellular organism development	123	36.2832	0.000159239	NCKAP1, IL1RAP, RPS6KA6, CFL2, AKT3, NBN, AZI2, B2M, PRKACB, SOX4, HMGN1, DYNC2H1, EPHA5, EPHA7, LMO4, MYH15, ARID5B, ACSL4, ANK3, HECW2, ZFPM2, MTMR2, BEX1, STXBP3, YTHDC1, DDX1, ARL3, RHOBTB3, TWIST1, TWF1, RTN4, CAMSAP2, SNX3, FXR1, DHX36, S100A10, SRPK2, CAV2, CAV1, NR2F1, BRAF, SMARCA1, ARHGAP24, PBX1, CCDC88A, LPAR6, UQCRQ, SP3, PHF14, GNB4, TCF4, TAB2, MNAT1, PAM, PICALM, ITGB1, PHF3, TOP2…
GO:0060491~regulation of cell projection assembly	13	3.83481	0.000168108	NCKAP1, CAV1, TWF1, WASL, DYNLL1, FNBP1L, ARHGAP24, FXR1, CYLD, CCDC88A, ATP7A, PFN2, SDCCAG8
GO:0000375~RNA splicing, via transesterification reactions	17	5.01475	0.000168385	SRPK2, YTHDC1, SCAF11, DDX1, CIRBP, PSIP1, ZCRB1, HTATSF1, FXR1, LSM8, UBL5, SNRPD2, RSRC1, HNRNPA2B1, SNRPG, SNRPF, HNRNPH3
GO:0090087~regulation of peptide transport	25	7.37463	0.000172704	SP100, LEPROT, ENY2, BMPR2, SNX3, UBL5, SCFD1, TPR, HMGN3, CEP290, SOX4, SH3GLB1, EPHA5, TMEM30A, ANXA1, VEGFC, ACSL4, ANK3, DYNLL1, DNAJA1, PKIA, TOMM7, NDUFAF2, GOPC, PAM
GO:0010628~positive regulation of gene expression	61	17.9941	0.000180746	BMPR2, HMGB2, PSIP1, WASL, ROBO1, NIPBL, CEP290, HMGN3, SOX4, HMGN1, IL11, SS18, PPP1R12A, LMO4, TCF12, CIRBP, TET2, CKAP2, ARID5B, CASK, EDF1, ANK3, TFDP2, SUB1, IRF1, PAX9, GUF1, ZNF711, PHIP, ZFPM2, BIRC2, ASF1A, SP100, ENY2, BEX1, ROCK1, NLRC5, CREM, TWIST1, NTS, FXR1, SH3BGRL, IFI16, DHX36, S100A10, ATF7IP, SRPK2, YTHDF3, CAV1, SMARCA5, NR2F1, BRAF, SMARCA1, LARP4, PBX1, ASXL3, SP3, REL, TCF…
GO:0000245~spliceosomal complex assembly	9	2.65487	0.000189506	SRPK2, SNRPD2, SCAF11, YTHDC1, DDX1, SNRPG, PSIP1, SNRPF, HTATSF1
GO:0065003~macromolecular complex assembly	53	15.6342	0.000190104	NCKAP1, NDUFA12, HMGB2, PSIP1, WASL, IL1RAP, TUBA1A, SNRPD2, PEG10, AP3S1, B2M, PRKACB, TMSB10, SH3GLB1, SCAF11, LMO4, CIRBP, NDUFC1, KCTD3, RASA1, SUB1, SNRPG, SNRPF, BIRC2, ASF1A, PFN2, YTHDC1, ARL3, NDUFB4, DDX1, NDUFB3, TWIST1, TWF1, HTATSF1, ADD3, RTN4, CAMSAP2, DHX36, LPXN, ATF7IP, SRPK2, NDUFA5, YTHDF3, SMARCA5, NDUFA1, NAP1L1, TBCA, NEDD1, NDUFAF2, TCF4, EIF3E, MNAT1, PICALM
GO:0044087~regulation of cellular component biogenesis	36	10.6195	0.000191034	NCKAP1, ROCK1, ARL3, TWIST1, TWF1, WASL, IL1RAP, FNBP1L, ADD3, CAMSAP2, FXR1, SCFD1, TPR, DHX36, HAS2, ATP7A, SNX7, PAK2, TMSB10, S100A10, SH3GLB1, ATF7IP, EPHA7, LMO4, CAV1, BRAF, DYNLL1, ARHGAP24, CYLD, CCDC88A, RASA1, SUB1, CHMP2B, BIRC2, PFN2, SDCCAG8
GO:0009889~regulation of biosynthetic process	114	33.6283	0.000192948	IL1RAP, ZNF329, ZNF326, NBN, HMGN3, MAP3K7, SOX4, HMGN1, EPHA5, LMO4, CIRBP, CASK, ARID5B, RFX7, SUB1, GUF1, ZNF711, PHIP, ZFPM2, CGGBP1, ASF1A, ENY2, BEX1, GPR87, DDX1, CREM, TWIST1, NTS, HTATSF1, FXR1, RAD21, TPR, DHX36, S100A10, CBX3, CAV1, SMARCA5, NR2F1, CDC7, LARP4, SMARCA1, PBX1, CYLD, CCDC88A, PKIA, SP3, REL, PHF14, RAD17, TCF4, MNAT1, ZNF654, PAM, PICALM, CPEB4, BMPR2, BNC2, TNFAIP6, HMG…
GO:0044238~primary metabolic process	230	67.8466	0.000197405	SMC6, RPL9, HERC5, RPS6KA6, SNRPD2, RPL36AL, AKT3, B2M, PRKACB, SOX4, RPS12, DYNC2H1, EPHA5, EPHA7, SCAF11, CIRBP, DDX10, ACSL4, RFX7, SUB1, HECW2, GUF1, ZNF711, ZFPM2, ASF1A, CGGBP1, PFN2, MTMR2, BEX1, DCUN1D5, TWIST1, TWF1, HTATSF1, SNX3, FXR1, RAD21, DHX36, TRMT1L, S100A10, SRPK2, RPL41, SMARCA5, NR2F1, CDC7, BRAF, LARP4, SMARCA1, PBX1, DERA, CYLD, CCDC88A, PKIA, REL, RAD17, RPS20, PAM, RPS24,…
GO:0030705~cytoskeleton-dependent intracellular transport	13	3.83481	0.000201416	DYNC2H1, DYNC1I2, ARL3, LCA5, WASL, DYNLL1, FNBP1L, WDR35, SOD1, CCDC88A, TUBA1A, AP3S1, IFT57
GO:0051493~regulation of cytoskeleton organization	24	7.07965	0.00020514	EPHA5, NCKAP1, ROCK1, ARL3, RHOBTB3, CKAP2, TWF1, BRAF, WASL, ADD3, CAMSAP2, CYLD, CCDC88A, RASA1, CFL2, TPR, CHMP2B, PAK2, MPDZ, PAM, TMSB10, MAP9, PFN2, S100A10
GO:1902589~single-organism organelle organization	54	15.9292	0.000211005	ITGB1, NCKAP1, TOP2B, WASL, FNBP1L, SYNE1, UFL1, NIPBL, TUBA1A, CFL2, FUNDC1, PHACTR2, HMCN1, SPDL1, IFT57, CEP290, TMSB10, DYNC2H1, ANXA1, CKAP2, VRK1, DYNLL1, WDR35, ENAH, RASA1, HECW2, EXOC5, PFN2, ROCK1, ARL3, RHOBTB3, TWF1, ADD3, RTN4, HSP90B1, CAMSAP2, RAD21, TPR, SNX7, PAK2, S100A10, CAV2, LCA5, SMARCA5, BRAF, CDC42BPA, SOD1, CCDC88A, NEDD1, KIAA0586, CHMP2B, TOMM7, PAM, PICALM
GO:0051130~positive regulation of cellular component organization	44	12.9794	0.000221404	ITGB1, NCKAP1, LEPROT, BMPR2, ROCK1, ARL3, TWIST1, TWF1, WASL, IL1RAP, FNBP1L, ROBO1, SNX3, UBL5, NIPBL, CFL2, RAD21, TPR, DHX36, HAS2, NBN, ATP7A, SNX7, RAB11FIP2, B2M, SCYL2, S100A10, SH3GLB1, ATF7IP, TMEM30A, ANXA1, CAV1, SMARCA5, BRAF, DYNLL1, WDR35, SOD1, CCDC88A, SUB1, HNRNPA2B1, TOMM7, POT1, PHIP, PFN2
GO:0048731~system development	115	33.9233	0.000222964	NCKAP1, IL1RAP, RPS6KA6, CFL2, AKT3, NBN, AZI2, B2M, PRKACB, SOX4, HMGN1, DYNC2H1, EPHA5, EPHA7, LMO4, MYH15, ARID5B, ACSL4, ANK3, HECW2, ZFPM2, MTMR2, BEX1, STXBP3, ARL3, RHOBTB3, TWIST1, TWF1, RTN4, CAMSAP2, SNX3, FXR1, DHX36, S100A10, SRPK2, CAV2, CAV1, NR2F1, BRAF, SMARCA1, ARHGAP24, PBX1, CCDC88A, UQCRQ, SP3, PHF14, GNB4, TCF4, TAB2, MNAT1, PAM, PICALM, ITGB1, TOP2B, COX7B, BMPR2, BNC2, TNFA…
GO:0034654~nucleobase-containing compound biosynthetic process	100	29.4985	0.000233699	NDUFA12, IL1RAP, ZNF329, ZNF326, HMGN3, MAP3K7, SOX4, HMGN1, EPHA5, LMO4, CASK, ARID5B, RFX7, SUB1, ZNF711, PHIP, ZFPM2, CGGBP1, ASF1A, ENY2, BEX1, GPR87, DDX1, CREM, TWIST1, NTS, HTATSF1, RAD21, TPR, DHX36, LPXN, S100A10, CBX3, CAV1, SMARCA5, NR2F1, SMARCA1, PBX1, CYLD, PKIA, SP3, REL, PHF14, TCF4, MNAT1, ZNF654, PAM, PICALM, PHF3, BMPR2, BNC2, TNFAIP6, HMGB2, PSIP1, WASL, PTPRK, PHF6, UFL1, NIP…
GO:0071103~DNA conformation change	17	5.01475	0.000236406	TOP2B, ANXA1, CBX3, DDX1, HMGB2, SMARCA5, NAP1L1, SUB1, TPR, DHX36, HNRNPA2B1, POT1, NBN, MNAT1, DTD1, PAM, ASF1A
GO:0097659~nucleic acid-templated transcription	91	26.8437	0.000236964	PHF3, BMPR2, BNC2, TNFAIP6, HMGB2, PSIP1, WASL, PTPRK, IL1RAP, PHF6, UFL1, NIPBL, SNAPC3, ZNF329, GATAD1, ZNF326, ZNF766, CEP290, MAP3K7, HMGN3, SOX4, HMGN1, PRMT6, EPHA5, IL11, SS18, USP47, PPP1R12A, LMO4, TCF12, TET2, CKAP2, ARID5B, CASK, EDF1, ZHX1, SLTM, TFDP2, RFX7, SUB1, IRF1, CAT, PAX9, TAX1BP1, ZNF711, PHIP, ZFPM2, BIRC2, CGGBP1, ASF1A, SP100, CAMK2D, ENY2, BEX1, DDX1, NLRC5, CREM, TWIST1…
GO:0030182~neuron differentiation	43	12.6844	0.00024443	ITGB1, NCKAP1, TOP2B, MTMR2, BMPR2, ROCK1, ARL3, USP33, TWF1, WASL, PTPRK, HDAC9, RTN4, ROBO1, CAMSAP2, SNX3, DHX36, ATP7A, PAK2, B2M, CEP290, SCYL2, SOX4, DYNC2H1, EPHA5, EPHA7, TMEM30A, LMO4, TCF12, NR2F1, ACSL4, BRAF, ANK3, SMARCA1, PBX1, SOD1, NELL2, ENAH, CCDC88A, UQCRQ, HECW2, TCF4, PICALM
GO:0009653~anatomical structure morphogenesis	72	21.2389	0.000264428	ITGB1, NCKAP1, TOP2B, BMPR2, USP33, WASL, ROBO1, NIPBL, TUBA1A, CFL2, AKT3, ITGAV, ATP7A, IFT57, CEP290, PRKACB, SOX4, HMGN1, DYNC2H1, EPHA5, SS18, EPHA7, ANXA1, TNFRSF12A, LMO4, ARID5B, ANK3, PTBP3, TGFBR2, ENAH, MMP13, RASA1, HECW2, PAX9, PHIP, EXOC5, ZFPM2, SDCCAG8, SP100, MTMR2, ROCK1, RHOBTB3, TWIST1, PRCP, HDAC9, RNF2, RTN4, MYL12B, SCFD1, SNX2, PALMD, DHX36, LPXN, HAS2, IGF2BP3, PAK2, GBP1…
GO:0044267~cellular protein metabolic process	125	36.8732	0.000296713	UBXN2A, PLOD2, SMC6, RPL9, HERC5, RPS6KA6, RPL36AL, AKT3, NBN, PRKACB, MAP3K7, SOX4, RPS12, EPHA5, EPHA7, CIRBP, UBE2E1, CASK, VRK1, HECW2, GUF1, FKBP7, PHIP, PPIG, PFN2, ENY2, MTMR2, DCUN1D5, DDX1, TWIST1, TWF1, HSP90B1, FXR1, TPR, DHX36, ZC3H15, S100A10, SRPK2, OSBPL8, RPL41, CAV2, CAV1, SMARCA5, CDC7, BRAF, LARP4, CYLD, CCDC88A, APPBP2, P4HA1, PKIA, GNAQ, CHMP2B, PHF14, TAB2, RPS20, MNAT1, PAM…
GO:0042221~response to chemical	107	31.5634	0.000297705	UBXN2A, IL1RAP, SESN3, PEG10, IL13RA2, AZI2, B2M, PRKACB, MAP3K7, SOX4, EPHA5, EPHA7, LMO4, CASK, ARID5B, ACSL4, ANK3, ACAP2, COL4A6, PHIP, ENY2, STXBP3, DDX1, TWIST1, RTN4, HSP90B1, SCFD1, TPR, DHX36, LPXN, RAB11FIP2, ZC3H15, S100A10, OSBPL8, CBX3, CAV2, CAV1, SMARCA5, BRAF, CYLD, GNAQ, NDUFAF2, REL, TAB2, MNAT1, PAM, CPEB4, ITGB1, BMPR2, TNFAIP6, USP33, HMGB2, PTPRK, ROBO1, UFL1, TUBA1A, RSRC1,…
GO:0032774~RNA biosynthetic process	91	26.8437	0.000302534	PHF3, BMPR2, BNC2, TNFAIP6, HMGB2, PSIP1, WASL, PTPRK, IL1RAP, PHF6, UFL1, NIPBL, SNAPC3, ZNF329, GATAD1, ZNF326, ZNF766, CEP290, MAP3K7, HMGN3, SOX4, HMGN1, PRMT6, EPHA5, IL11, SS18, USP47, PPP1R12A, LMO4, TCF12, TET2, CKAP2, ARID5B, CASK, EDF1, ZHX1, SLTM, TFDP2, RFX7, SUB1, IRF1, CAT, PAX9, TAX1BP1, ZNF711, PHIP, ZFPM2, BIRC2, CGGBP1, ASF1A, SP100, CAMK2D, ENY2, BEX1, DDX1, NLRC5, CREM, TWIST1…
GO:0019438~aromatic compound biosynthetic process	101	29.7935	0.000309302	NDUFA12, IL1RAP, ZNF329, ZNF326, HMGN3, MAP3K7, SOX4, HMGN1, EPHA5, LMO4, CASK, ARID5B, RFX7, SUB1, ZNF711, PHIP, ZFPM2, CGGBP1, ASF1A, ENY2, BEX1, GPR87, DDX1, CREM, TWIST1, NTS, HTATSF1, RAD21, TPR, DHX36, LPXN, S100A10, CBX3, CAV1, SMARCA5, NR2F1, SMARCA1, PBX1, CYLD, PKIA, SP3, REL, PHF14, TCF4, MNAT1, ZNF654, PAM, PICALM, PHF3, BMPR2, BNC2, TNFAIP6, HMGB2, PSIP1, WASL, PTPRK, PHF6, UFL1, NIP…
GO:0071704~organic substance metabolic process	236	69.6165	0.000319071	SMC6, RPL9, HERC5, RPS6KA6, SNRPD2, RPL36AL, AKT3, B2M, PRKACB, SOX4, RPS12, DYNC2H1, EPHA5, EPHA7, SCAF11, CIRBP, DDX10, ACSL4, ANK3, RFX7, SUB1, HECW2, GUF1, ZNF711, ZFPM2, ASF1A, CGGBP1, PFN2, MTMR2, BEX1, DCUN1D5, TWIST1, TWF1, HTATSF1, SNX3, FXR1, RAD21, DHX36, TRMT1L, S100A10, SRPK2, RPL41, SMARCA5, NR2F1, CDC7, BRAF, LARP4, SMARCA1, PBX1, DERA, CYLD, CCDC88A, PKIA, REL, RAD17, RPS20, PAM, …
GO:0044249~cellular biosynthetic process	143	42.1829	0.000327748	NDUFA12, PLOD2, IL1RAP, RPL9, RPL36AL, ZNF329, ZNF326, NBN, HMGN3, MAP3K7, SOX4, RPS12, HMGN1, EPHA5, LMO4, CIRBP, CASK, ARID5B, ACSL4, RFX7, SUB1, GUF1, ZNF711, PHIP, ZFPM2, CGGBP1, ASF1A, ENY2, MTMR2, BEX1, GPR87, DDX1, CREM, TWIST1, NTS, HTATSF1, FXR1, RAD21, TPR, DHX36, LPXN, ZC3H15, S100A10, RPL41, CBX3, CAV1, SMARCA5, NR2F1, CDC7, LARP4, SMARCA1, PBX1, CYLD, CCDC88A, PKIA, SP3, REL, PHF14, …
GO:0042773~ATP synthesis coupled electron transport	9	2.65487	0.000328584	COX7B, UQCRB, NDUFA5, UQCRQ, NDUFA12, NDUFB4, NDUFB3, NDUFA1, NDUFC1
GO:0042775~mitochondrial ATP synthesis coupled electron transport	9	2.65487	0.000328584	COX7B, UQCRB, NDUFA5, UQCRQ, NDUFA12, NDUFB4, NDUFB3, NDUFA1, NDUFC1
GO:0036211~protein modification process	94	27.7286	0.000341599	BMPR2, UBXN2A, USP33, PTPN21, PLOD2, PTPRK, SMC6, ROBO1, HERC5, UBL5, UFL1, RPS6KA6, NIPBL, RSRC1, B3GALT1, AKT3, ITGAV, NBN, ATP7A, PRKACB, MAP3K7, SCYL2, SOX4, PRMT6, EPHA5, IL11, USP47, EPHA7, ANXA1, PPP1R12A, TET2, UBE2E1, CASK, VRK1, PJA2, TGFBR2, RAP2B, DBF4, HECW2, FKBP7, PHIP, PPIG, BIRC2, PFN2, CAMK2D, MTMR2, ENY2, DCUN1D5, ROCK1, ZDHHC20, TWIST1, TWF1, HDAC9, TANK, RNF2, HSP90B1, FXR1, …
GO:0006464~cellular protein modification process	94	27.7286	0.000341599	BMPR2, UBXN2A, USP33, PTPN21, PLOD2, PTPRK, SMC6, ROBO1, HERC5, UBL5, UFL1, RPS6KA6, NIPBL, RSRC1, B3GALT1, AKT3, ITGAV, NBN, ATP7A, PRKACB, MAP3K7, SCYL2, SOX4, PRMT6, EPHA5, IL11, USP47, EPHA7, ANXA1, PPP1R12A, TET2, UBE2E1, CASK, VRK1, PJA2, TGFBR2, RAP2B, DBF4, HECW2, FKBP7, PHIP, PPIG, BIRC2, PFN2, CAMK2D, MTMR2, ENY2, DCUN1D5, ROCK1, ZDHHC20, TWIST1, TWF1, HDAC9, TANK, RNF2, HSP90B1, FXR1, …
GO:0007346~regulation of mitotic cell cycle	23	6.78466	0.000342759	USP47, CDKN2B, CDKN2C, ANXA1, CAV2, SMARCA5, CDC7, PBX1, CYLD, NIPBL, PKIA, HECW2, RAD21, TPR, CHMP2B, RAD17, PHIP, PKN2, NBN, SPDL1, MNAT1, SOX4, MAP9
GO:0097435~supramolecular fiber organization	29	8.55457	0.000354691	ITGB1, NCKAP1, ROCK1, TNFAIP6, ARL3, RHOBTB3, TWF1, WASL, ADD3, HSP90B1, CAMSAP2, TUBA1A, CFL2, HMCN1, ATP7A, PAK2, TMSB10, B2M, S100A10, CKAP2, BRAF, ENAH, CCDC88A, NEDD1, P4HA1, RASA1, TLL1, PFDN4, PFN2
GO:0006915~apoptotic process	53	15.6342	0.000368378	ITGB1, NCKAP1, BMPR2, GBE1, HMGB2, ROBO1, UFL1, TUBA1A, PEG10, ITGAV, NBN, IFT57, MAP3K7, SOX4, SH3GLB1, USP47, EPHA7, ANXA1, TNFRSF12A, LANCL1, CKAP2, DYNLL1, WDR35, TGFBR2, SLTM, RASA1, IRF1, CAT, TAX1BP1, PHIP, EXOC5, BIRC2, SP100, CAMK2D, ROCK1, TWIST1, UACA, RTN4, HSP90B1, FXR1, IFI16, RAD21, PAK2, SRPK2, CAV1, BRAF, SOD1, DNAJA1, CYLD, PDCD4, PKN2, MNAT1, CPEB4
GO:0051338~regulation of transferase activity	33	9.73451	0.000389137	BMPR2, DCUN1D5, NLRC5, ROBO1, HERC5, NBN, PAK2, MAP3K7, HMGN1, EPHA5, OSBPL8, CDKN2B, EPHA7, CDKN2C, LMO4, CAV1, VEGFC, TGFBR2, SOD1, DNAJA1, ETAA1, CCDC88A, RAP2B, DBF4, PKIA, GNAQ, HNRNPA2B1, PDCD4, POT1, TAB2, RPS20, SERINC1, MNAT1
GO:0006351~transcription, DNA-templated	87	25.6637	0.000395254	PHF3, BMPR2, TNFAIP6, HMGB2, PSIP1, WASL, PTPRK, IL1RAP, PHF6, UFL1, NIPBL, SNAPC3, ZNF329, ZNF326, CEP290, MAP3K7, HMGN3, SOX4, HMGN1, PRMT6, EPHA5, IL11, SS18, USP47, PPP1R12A, LMO4, TCF12, TET2, CKAP2, ARID5B, CASK, EDF1, ZHX1, SLTM, TFDP2, RFX7, SUB1, IRF1, CAT, PAX9, TAX1BP1, ZNF711, PHIP, ZFPM2, BIRC2, CGGBP1, ASF1A, SP100, CAMK2D, ENY2, BEX1, DDX1, NLRC5, CREM, TWIST1, NTS, HTATSF1, HDAC9,…
GO:0048666~neuron development	36	10.6195	0.000411413	ITGB1, NCKAP1, TOP2B, MTMR2, BMPR2, ROCK1, ARL3, USP33, TWF1, WASL, PTPRK, RTN4, ROBO1, CAMSAP2, SNX3, DHX36, ATP7A, PAK2, B2M, CEP290, SCYL2, EPHA5, EPHA7, TMEM30A, LMO4, NR2F1, ACSL4, BRAF, ANK3, PBX1, SOD1, NELL2, ENAH, UQCRQ, HECW2, PICALM
GO:0031326~regulation of cellular biosynthetic process	111	32.7434	0.000438025	IL1RAP, ZNF329, ZNF326, NBN, HMGN3, MAP3K7, SOX4, HMGN1, EPHA5, LMO4, CIRBP, CASK, ARID5B, RFX7, SUB1, GUF1, ZNF711, PHIP, ZFPM2, CGGBP1, ASF1A, ENY2, BEX1, GPR87, DDX1, CREM, TWIST1, NTS, HTATSF1, FXR1, RAD21, TPR, DHX36, S100A10, CBX3, CAV1, SMARCA5, NR2F1, CDC7, LARP4, SMARCA1, PBX1, CYLD, CCDC88A, PKIA, SP3, REL, PHF14, RAD17, TCF4, MNAT1, ZNF654, PAM, PICALM, CPEB4, BMPR2, BNC2, TNFAIP6, HMG…
GO:0032508~DNA duplex unwinding	8	2.35988	0.000442895	ANXA1, DDX1, SUB1, DHX36, POT1, NBN, MNAT1, DTD1
GO:0006355~regulation of transcription, DNA-templated	87	25.6637	0.000455792	BMPR2, BNC2, TNFAIP6, HMGB2, PSIP1, WASL, PTPRK, IL1RAP, PHF6, UFL1, NIPBL, ZNF329, GATAD1, ZNF326, ZNF766, CEP290, MAP3K7, HMGN3, SOX4, HMGN1, PRMT6, EPHA5, IL11, SS18, USP47, PPP1R12A, LMO4, TCF12, TET2, CKAP2, ARID5B, CASK, EDF1, ZHX1, SLTM, TFDP2, RFX7, SUB1, IRF1, CAT, PAX9, TAX1BP1, ZNF711, PHIP, ZFPM2, BIRC2, CGGBP1, ASF1A, SP100, CAMK2D, ENY2, BEX1, NLRC5, CREM, TWIST1, NTS, HTATSF1, HDAC…
GO:0034622~cellular macromolecular complex assembly	40	11.7994	0.000457272	NCKAP1, NDUFA12, YTHDC1, ARL3, NDUFB4, DDX1, NDUFB3, HMGB2, PSIP1, TWF1, WASL, HTATSF1, ADD3, RTN4, CAMSAP2, TUBA1A, SNRPD2, AP3S1, TMSB10, B2M, SRPK2, NDUFA5, YTHDF3, SCAF11, CIRBP, SMARCA5, NDUFA1, NAP1L1, NDUFC1, TBCA, NEDD1, RASA1, NDUFAF2, SNRPG, TCF4, EIF3E, SNRPF, ASF1A, PFN2, PICALM
GO:0018130~heterocycle biosynthetic process	100	29.4985	0.00046027	NDUFA12, IL1RAP, ZNF329, ZNF326, HMGN3, MAP3K7, SOX4, HMGN1, EPHA5, LMO4, CASK, ARID5B, RFX7, SUB1, ZNF711, PHIP, ZFPM2, CGGBP1, ASF1A, ENY2, BEX1, GPR87, DDX1, CREM, TWIST1, NTS, HTATSF1, RAD21, TPR, DHX36, LPXN, S100A10, CBX3, CAV1, SMARCA5, NR2F1, SMARCA1, PBX1, CYLD, PKIA, SP3, REL, PHF14, TCF4, MNAT1, ZNF654, PAM, PICALM, PHF3, BMPR2, BNC2, TNFAIP6, HMGB2, PSIP1, WASL, PTPRK, PHF6, UFL1, NIP…
GO:0030154~cell differentiation	100	29.4985	0.000464074	NCKAP1, CFL2, PEG10, AZI2, B2M, SOX4, DYNC2H1, EPHA5, EPHA7, LMO4, ARID5B, ACSL4, ANK3, HECW2, ZFPM2, ASF1A, MTMR2, BEX1, YTHDC1, ARL3, CREM, TWIST1, TWF1, RTN4, CAMSAP2, SNX3, FXR1, DHX36, LPXN, S100A10, SRPK2, OSBPL8, CAV2, CAV1, NR2F1, BRAF, SMARCA1, ARHGAP24, PBX1, CCDC88A, UQCRQ, SP3, PHF14, TCF4, PICALM, ITGB1, TOP2B, BMPR2, TNFAIP6, USP33, HMGB2, WASL, PTPRK, SYNE1, ROBO1, UFL1, NIPBL, TUB…
GO:0015031~protein transport	50	14.7493	0.000466254	BMPR2, UBL5, TUBA1A, AP3S1, TNPO1, IFT57, CEP290, HMGN3, SOX4, SH3GLB1, DYNC2H1, EPHA5, ANXA1, ACSL4, ANK3, DYNLL1, WDR35, EXOC5, SP100, LEPROT, ENY2, STXBP3, ZDHHC20, YTHDC1, ARL3, VPS26A, HSP90B1, SNX3, SCFD1, SNX2, TPR, CHML, SNX7, RAB11FIP2, ANKRD50, TMEM30A, SSB, VTA1, CAV1, LCA5, VEGFC, KTN1, APPBP2, PKIA, HNRNPA2B1, CHMP2B, TOMM7, NDUFAF2, GOPC, PAM
GO:1903506~regulation of nucleic acid-templated transcription	87	25.6637	0.000468042	BMPR2, BNC2, TNFAIP6, HMGB2, PSIP1, WASL, PTPRK, IL1RAP, PHF6, UFL1, NIPBL, ZNF329, GATAD1, ZNF326, ZNF766, CEP290, MAP3K7, HMGN3, SOX4, HMGN1, PRMT6, EPHA5, IL11, SS18, USP47, PPP1R12A, LMO4, TCF12, TET2, CKAP2, ARID5B, CASK, EDF1, ZHX1, SLTM, TFDP2, RFX7, SUB1, IRF1, CAT, PAX9, TAX1BP1, ZNF711, PHIP, ZFPM2, BIRC2, CGGBP1, ASF1A, SP100, CAMK2D, ENY2, BEX1, NLRC5, CREM, TWIST1, NTS, HTATSF1, HDAC…
GO:0010638~positive regulation of organelle organization	26	7.66962	0.000479784	NCKAP1, LEPROT, ARL3, WASL, UBL5, NIPBL, CFL2, RAD21, TPR, DHX36, NBN, SNX7, S100A10, SH3GLB1, ATF7IP, ANXA1, SMARCA5, BRAF, DYNLL1, WDR35, CCDC88A, HNRNPA2B1, TOMM7, POT1, PHIP, PFN2
GO:0015833~peptide transport	51	15.0442	0.000510051	BMPR2, UBL5, TUBA1A, AP3S1, TNPO1, IFT57, CEP290, HMGN3, SOX4, SH3GLB1, DYNC2H1, EPHA5, ANXA1, ACSL4, ANK3, DYNLL1, WDR35, EXOC5, SP100, LEPROT, ENY2, STXBP3, ZDHHC20, YTHDC1, ARL3, VPS26A, HSP90B1, SNX3, SCFD1, SNX2, TPR, CHML, SNX7, RAB11FIP2, ANKRD50, TMEM30A, SSB, VTA1, CAV1, LCA5, VEGFC, KTN1, DNAJA1, APPBP2, PKIA, HNRNPA2B1, CHMP2B, TOMM7, NDUFAF2, GOPC, PAM
GO:0010556~regulation of macromolecule biosynthetic process	107	31.5634	0.000523863	IL1RAP, ZNF329, ZNF326, NBN, HMGN3, MAP3K7, SOX4, HMGN1, EPHA5, LMO4, CIRBP, CASK, ARID5B, RFX7, SUB1, GUF1, ZNF711, PHIP, ZFPM2, CGGBP1, ASF1A, ENY2, BEX1, DDX1, CREM, TWIST1, NTS, HTATSF1, FXR1, RAD21, TPR, DHX36, S100A10, CBX3, CAV1, SMARCA5, NR2F1, CDC7, LARP4, SMARCA1, PBX1, CYLD, CCDC88A, PKIA, SP3, REL, PHF14, RAD17, TCF4, MNAT1, ZNF654, PAM, PICALM, CPEB4, BMPR2, BNC2, TNFAIP6, HMGB2, PSI…
GO:2001141~regulation of RNA biosynthetic process	87	25.6637	0.000533901	BMPR2, BNC2, TNFAIP6, HMGB2, PSIP1, WASL, PTPRK, IL1RAP, PHF6, UFL1, NIPBL, ZNF329, GATAD1, ZNF326, ZNF766, CEP290, MAP3K7, HMGN3, SOX4, HMGN1, PRMT6, EPHA5, IL11, SS18, USP47, PPP1R12A, LMO4, TCF12, TET2, CKAP2, ARID5B, CASK, EDF1, ZHX1, SLTM, TFDP2, RFX7, SUB1, IRF1, CAT, PAX9, TAX1BP1, ZNF711, PHIP, ZFPM2, BIRC2, CGGBP1, ASF1A, SP100, CAMK2D, ENY2, BEX1, NLRC5, CREM, TWIST1, NTS, HTATSF1, HDAC…
GO:0016032~viral process	27	7.9646	0.000556078	ITGB1, TOP2B, SP100, ZDHHC20, DDX1, NLRC5, HTATSF1, TANK, IFI44L, SNX3, HERC5, IFI16, DHX36, ITGAV, AZI2, GBP1, GBP3, SRPK2, SSB, CAV2, VTA1, CAV1, IFI44, IRF1, CHMP2B, PKN2, BIRC2
GO:2000112~regulation of cellular macromolecule biosynthetic process	106	31.2684	0.000568098	IL1RAP, ZNF329, ZNF326, NBN, HMGN3, MAP3K7, SOX4, HMGN1, EPHA5, LMO4, CIRBP, CASK, ARID5B, RFX7, SUB1, GUF1, ZNF711, PHIP, ZFPM2, CGGBP1, ASF1A, ENY2, BEX1, DDX1, CREM, TWIST1, NTS, HTATSF1, FXR1, RAD21, TPR, DHX36, S100A10, CBX3, CAV1, SMARCA5, NR2F1, CDC7, LARP4, SMARCA1, PBX1, CYLD, CCDC88A, PKIA, SP3, REL, PHF14, RAD17, TCF4, MNAT1, ZNF654, PAM, PICALM, CPEB4, BMPR2, BNC2, TNFAIP6, HMGB2, PSI…
GO:0006950~response to stress	97	28.6136	0.000568821	NDUFA12, PLOD2, SMC6, IL1RAP, IFI44L, HERC5, RPS6KA6, SESN3, AKT3, NBN, AZI2, B2M, MAP3K7, SOX4, HMGN1, SH3GLB1, CIRBP, CASK, VRK1, ASF1A, ENY2, DCUN1D5, STXBP3, DDX1, TWIST1, RTN4, HSP90B1, FXR1, SCFD1, RAD21, TPR, DHX36, RAB11FIP2, S100A10, SRPK2, CBX3, CAV1, SMARCA5, CDC7, BRAF, ARHGAP24, CYLD, GNAQ, CHMP2B, REL, RAD17, MNAT1, PAM, CPEB4, ITGB1, BMPR2, TNFAIP6, USP33, HMGB2, PSIP1, PTPRK, UFL1…
GO:0010257~NADH dehydrogenase complex assembly	7	2.0649	0.00059353	NDUFA5, NDUFA12, NDUFB4, NDUFB3, NDUFA1, NDUFAF2, NDUFC1
GO:0032981~mitochondrial respiratory chain complex I assembly	7	2.0649	0.00059353	NDUFA5, NDUFA12, NDUFB4, NDUFB3, NDUFA1, NDUFAF2, NDUFC1
GO:0097031~mitochondrial respiratory chain complex I biogenesis	7	2.0649	0.00059353	NDUFA5, NDUFA12, NDUFB4, NDUFB3, NDUFA1, NDUFAF2, NDUFC1
GO:0006397~mRNA processing	21	6.19469	0.000614158	SRPK2, YTHDC1, SCAF11, DDX1, CIRBP, PSIP1, ZCRB1, HTATSF1, PTBP3, FXR1, LSM8, UBL5, SNRPD2, RSRC1, DHX36, HNRNPA2B1, SNRPG, ZNF326, SNRPF, HNRNPH3, ZC3H13
GO:0001667~ameboidal-type cell migration	20	5.89971	0.000614592	ITGB1, SP100, ANXA1, BMPR2, ROCK1, VEGFC, TWIST1, ARID5B, BRAF, PRCP, HDAC9, RTN4, TGFBR2, ROBO1, AKT3, LPXN, HAS2, PKN2, LAMTOR2, PFN2
GO:2001251~negative regulation of chromosome organization	11	3.24484	0.000617863	PRMT6, SUB1, RAD21, TPR, SMARCA5, POT1, TWIST1, NBN, SPDL1, MNAT1, ASF1A
GO:0009987~cellular process	309	91.1504	0.000629963	NCKAP1, SMC6, FNBP1L, RPL9, HERC5, RPS6KA6, SNRPD2, RPL36AL, PEG10, AKT3, HMCN1, B2M, PRKACB, SOX4, RPS12, DYNC2H1, EPHA5, EPHA7, SCAF11, CIRBP, DDX10, ACSL4, ANK3, RFX7, SUB1, HECW2, GUF1, ZNF711, ZFPM2, ASF1A, CGGBP1, PFN2, MTMR2, BEX1, STXBP3, DCUN1D5, TWIST1, TWF1, VPS26A, HTATSF1, MYL12B, SNX3, FXR1, SCFD1, SNX2, RAD21, DHX36, SNX7, RAB11FIP2, MAP9, TRMT1L, S100A10, SRPK2, RPL41, SMARCA5, NR…
GO:0070848~response to growth factor	27	7.9646	0.000631163	BMPR2, ROCK1, TNFAIP6, TWIST1, PTPRK, ROBO1, PEG10, TPR, HAS2, LPXN, SHOC2, ATP7A, PAK2, MAP3K7, CDKN2B, ANXA1, CAV2, CAV1, VEGFC, CASK, BRAF, TGFBR2, ACAP2, BRMS1L, CAT, PAX9, PDCD4
GO:0031344~regulation of cell projection organization	26	7.66962	0.000646467	NCKAP1, BMPR2, TWF1, WASL, FNBP1L, RTN4, ROBO1, CAMSAP2, SNX3, FXR1, DHX36, ATP7A, PAK2, B2M, EPHA7, TMEM30A, CAV1, NR2F1, BRAF, DYNLL1, ARHGAP24, CYLD, CCDC88A, HECW2, PFN2, SDCCAG8
GO:0006974~cellular response to DNA damage stimulus	30	8.84956	0.000675177	SP100, ENY2, DCUN1D5, DDX1, HMGB2, TWIST1, SMC6, TANK, FXR1, UFL1, RPS6KA6, NIPBL, IFI16, RAD21, USP1, NBN, SOX4, HMGN1, PRMT6, USP47, CBX3, SMARCA5, VRK1, CDC7, DNAJA1, ETAA1, POT1, RAD17, MNAT1, ASF1A
GO:0051336~regulation of hydrolase activity	35	10.3245	0.000682496	ITGB1, CAMK2D, ROCK1, HMGB2, HDAC9, TANK, UACA, ROBO1, HSP90B1, IFI16, IFT57, RAB11FIP2, PAK2, ZC3H15, S100A10, PRMT6, EPHA5, USP47, EPHA7, ANXA1, PPP1R12A, CAV2, CAV1, DYNLL1, WDR35, ARHGAP24, SOD1, GNAQ, RASA1, C4ORF3, POT1, MNAT1, BIRC2, PFN2, PICALM
GO:0010467~gene expression	141	41.5929	0.000683453	IL1RAP, RPL9, SNRPD2, RPL36AL, ZNF329, ZNF326, HMGN3, PRKACB, MAP3K7, SOX4, RPS12, HMGN1, DYNC2H1, EPHA5, LMO4, SCAF11, CIRBP, CASK, DDX10, ARID5B, ANK3, ZCRB1, RFX7, SUB1, GUF1, SNRPG, ZNF711, PHIP, PPIG, SNRPF, ZFPM2, CGGBP1, ASF1A, ENY2, BEX1, YTHDC1, DDX1, CREM, TWIST1, NTS, HTATSF1, RPF1, FXR1, RAD21, TPR, DHX36, LPXN, ZC3H13, ZC3H15, TRMT1L, S100A10, SRPK2, RPL41, CBX3, CAV1, SMARCA5, NR2F1…
GO:1901362~organic cyclic compound biosynthetic process	102	30.0885	0.000684419	NDUFA12, IL1RAP, ZNF329, ZNF326, HMGN3, MAP3K7, SOX4, HMGN1, EPHA5, LMO4, CASK, ARID5B, RFX7, SUB1, ZNF711, PHIP, ZFPM2, CGGBP1, ASF1A, ENY2, BEX1, GPR87, DDX1, CREM, TWIST1, NTS, HTATSF1, RAD21, TPR, DHX36, LPXN, S100A10, CBX3, CAV1, SMARCA5, NR2F1, SMARCA1, PBX1, CYLD, PKIA, SP3, REL, PHF14, TCF4, MNAT1, ZNF654, PAM, PICALM, PHF3, BMPR2, BNC2, TNFAIP6, HMGB2, PSIP1, WASL, PTPRK, PHF6, UFL1, NIP…
GO:1901360~organic cyclic compound metabolic process	145	42.7729	0.000686843	NDUFA12, SMC6, IL1RAP, SNRPD2, ZNF329, ZNF326, NBN, HMGN3, MAP3K7, SOX4, HMGN1, EPHA5, LMO4, SCAF11, CIRBP, CASK, DDX10, ARID5B, ZCRB1, RFX7, SUB1, SNRPG, ZNF711, PHIP, PPIG, SNRPF, ZFPM2, CGGBP1, ASF1A, ENY2, BEX1, UQCRB, YTHDC1, GPR87, DDX1, CREM, TWIST1, NTS, HTATSF1, RPF1, FXR1, RAD21, TPR, DHX36, LPXN, ZC3H13, TRMT1L, S100A10, SRPK2, CBX3, CAV1, SMARCA5, NR2F1, CDC7, SMARCA1, PBX1, DERA, CYL…
GO:0016071~mRNA metabolic process	26	7.66962	0.000692261	YTHDC1, DDX1, PSIP1, HTATSF1, FXR1, UBL5, SNRPD2, RSRC1, DHX36, ZNF326, ZC3H13, S100A10, SRPK2, SSB, SCAF11, CIRBP, ZCRB1, PTBP3, PNRC2, LSM8, SLTM, HNRNPA2B1, SNRPG, EIF3E, SNRPF, HNRNPH3
GO:0007010~cytoskeleton organization	43	12.6844	0.000729464	ITGB1, NCKAP1, ROCK1, ARL3, USP33, RHOBTB3, TWF1, WASL, ADD3, HSP90B1, CAMSAP2, TUBA1A, CFL2, TPR, PHACTR2, HMCN1, SPDL1, PAK2, MPDZ, TMSB10, MAP9, S100A10, CNTLN, EPHA5, SS18, ANXA1, PPP1R12A, CKAP2, BRAF, ANK3, CDC42BPA, LARP4, SOD1, ENAH, CYLD, CCDC88A, NEDD1, RASA1, CHMP2B, PHIP, PAM, PFN2, SDCCAG8
GO:0044091~membrane biogenesis	6	1.76991	0.000759569	CAV2, CAV1, SERINC1, ANK3, S100A10, PICALM
GO:0019538~protein metabolic process	135	39.823	0.000771256	UBXN2A, PLOD2, SMC6, RPL9, HERC5, RPS6KA6, RPL36AL, AKT3, NBN, B2M, PRKACB, MAP3K7, SOX4, RPS12, DYNC2H1, EPHA5, EPHA7, CIRBP, UBE2E1, CASK, VRK1, HECW2, GUF1, FKBP7, PHIP, PPIG, PFN2, ENY2, MTMR2, DCUN1D5, DDX1, TWIST1, TWF1, TRHDE, RTN4, HSP90B1, SNX3, FXR1, TPR, DHX36, ZC3H15, S100A10, SRPK2, OSBPL8, RPL41, CAV2, CAV1, SMARCA5, CDC7, BRAF, LARP4, CYLD, CCDC88A, APPBP2, P4HA1, PKIA, GNAQ, CHMP2…
GO:0030031~cell projection assembly	22	6.48968	0.000773451	ITGB1, DYNC2H1, NCKAP1, ROCK1, ARL3, CAV1, TWF1, WASL, DYNLL1, FNBP1L, WDR35, ARHGAP24, FXR1, CYLD, CCDC88A, KIAA0586, EXOC5, IFT57, ATP7A, CEP290, PFN2, SDCCAG8
GO:0045935~positive regulation of nucleobase-containing compound metabolic process	55	16.2242	0.000776755	TOP2B, BMPR2, HMGB2, PSIP1, WASL, NIPBL, NBN, CEP290, HMGN3, SOX4, HMGN1, IL11, SS18, PPP1R12A, LMO4, TCF12, CIRBP, TET2, CKAP2, ARID5B, CASK, EDF1, DBF4, TFDP2, SUB1, IRF1, PAX9, POT1, ZNF711, PHIP, ZFPM2, BIRC2, ASF1A, SP100, ENY2, BEX1, NLRC5, CREM, TWIST1, IFI16, DHX36, USP1, S100A10, ATF7IP, SMARCA5, NR2F1, CDC7, SMARCA1, PBX1, ASXL3, SP3, HNRNPA2B1, REL, TCF4, PICALM
GO:0010256~endomembrane system organization	27	7.9646	0.000798898	ITGB1, ROCK1, UBXN2A, WASL, FNBP1L, RTN4, SYNE1, SNX3, EMC2, AP3S1, RAB11FIP2, GBP1, S100A10, SH3GLB1, DYNC2H1, OSBPL8, CAV2, VTA1, CAV1, VRK1, ANK3, SOD1, CCDC88A, CHMP2B, GOPC, EXOC5, PICALM
GO:0042886~amide transport	51	15.0442	0.000809105	BMPR2, UBL5, TUBA1A, AP3S1, TNPO1, IFT57, CEP290, HMGN3, SOX4, SH3GLB1, DYNC2H1, EPHA5, ANXA1, ACSL4, ANK3, DYNLL1, WDR35, EXOC5, SP100, LEPROT, ENY2, STXBP3, ZDHHC20, YTHDC1, ARL3, VPS26A, HSP90B1, SNX3, SCFD1, SNX2, TPR, CHML, SNX7, RAB11FIP2, ANKRD50, TMEM30A, SSB, VTA1, CAV1, LCA5, VEGFC, KTN1, DNAJA1, APPBP2, PKIA, HNRNPA2B1, CHMP2B, TOMM7, NDUFAF2, GOPC, PAM
GO:0044764~multi-organism cellular process	27	7.9646	0.000831998	ITGB1, TOP2B, SP100, ZDHHC20, DDX1, NLRC5, HTATSF1, TANK, IFI44L, SNX3, HERC5, IFI16, DHX36, ITGAV, AZI2, GBP1, GBP3, SRPK2, SSB, CAV2, VTA1, CAV1, IFI44, IRF1, CHMP2B, PKN2, BIRC2
GO:0010639~negative regulation of organelle organization	19	5.60472	0.000865002	PRMT6, SMARCA5, CKAP2, TWIST1, TWF1, ADD3, CAMSAP2, SCFD1, SUB1, RAD21, TPR, POT1, NBN, SPDL1, MNAT1, PAK2, TMSB10, ASF1A, PFN2
GO:0050794~regulation of cellular process	227	66.9617	0.000889824	NCKAP1, SMC6, FNBP1L, HERC5, RPS6KA6, PEG10, AKT3, B2M, PRKACB, SOX4, RPS12, DYNC2H1, EPHA5, EPHA7, CIRBP, ACSL4, ANK3, RFX7, SUB1, HECW2, GUF1, ZNF711, ZFPM2, ASF1A, CGGBP1, PFN2, MTMR2, BEX1, STXBP3, DCUN1D5, TWIST1, TWF1, VPS26A, HTATSF1, MYL12B, SNX3, FXR1, SCFD1, RAD21, DHX36, SNX7, RAB11FIP2, MAP9, S100A10, SRPK2, SMARCA5, NR2F1, CDC7, BRAF, LARP4, SMARCA1, GNG11, PBX1, CYLD, CCDC88A, LPAR6…
GO:0007507~heart development	23	6.78466	0.000921364	ITGB1, DYNC2H1, BMPR2, ROCK1, LMO4, TWIST1, HDAC9, RTN4, TGFBR2, ROBO1, NIPBL, TFDP2, SGCB, DHX36, PDCD4, HAS2, TAB2, ACADM, IFT57, MNAT1, ZFPM2, PAM, SOX4
GO:0044707~single-multicellular organism process	139	41.0029	0.000927761	NCKAP1, NDUFA12, IL1RAP, RPS6KA6, CFL2, AKT3, NBN, AZI2, B2M, PRKACB, MAP3K7, SOX4, HMGN1, DYNC2H1, EPHA5, EPHA7, LMO4, MYH15, ARID5B, ACSL4, ANK3, HECW2, ZFPM2, ASF1A, PFN2, MTMR2, BEX1, STXBP3, YTHDC1, DDX1, ARL3, RHOBTB3, TWIST1, TWF1, RTN4, CAMSAP2, SNX3, FXR1, DHX36, LPXN, S100A10, SRPK2, CAV2, CAV1, NR2F1, BRAF, SMARCA1, ARHGAP24, PBX1, CYLD, CCDC88A, LPAR6, UQCRQ, GNAQ, SP3, REL, PHF14, GN…
GO:0010468~regulation of gene expression	114	33.6283	0.000929658	UBXN2A, IL1RAP, ZNF329, ZNF326, HMGN3, PRKACB, MAP3K7, SOX4, HMGN1, EPHA5, LMO4, CIRBP, CASK, ARID5B, ANK3, RFX7, SUB1, GUF1, ZNF711, PHIP, ZFPM2, CGGBP1, ASF1A, ENY2, BEX1, YTHDC1, DDX1, CREM, TWIST1, NTS, HTATSF1, FXR1, RAD21, TPR, DHX36, S100A10, SRPK2, CBX3, CAV1, SMARCA5, NR2F1, BRAF, LARP4, SMARCA1, PBX1, CYLD, PKIA, SP3, REL, PHF14, TCF4, MNAT1, ZNF654, PAM, PICALM, CPEB4, BMPR2, BNC2, TNF…
GO:0051726~regulation of cell cycle	36	10.6195	0.000941918	ITGB1, PTPRK, HERC5, NIPBL, RAD21, TPR, NBN, SPDL1, PRKACB, SOX4, MAP9, SRPK2, SH3GLB1, USP47, CDKN2B, CDKN2C, ANXA1, CAV2, FBXL17, SMARCA5, CDC7, PBX1, ETAA1, CYLD, DBF4, TFDP2, PKIA, IRF1, HECW2, CHMP2B, PDCD4, RAD17, PKN2, PHIP, MNAT1, BIRC2
GO:0006119~oxidative phosphorylation	9	2.65487	0.00095191	COX7B, UQCRB, NDUFA5, UQCRQ, NDUFA12, NDUFB4, NDUFB3, NDUFA1, NDUFC1
GO:0045185~maintenance of protein location	8	2.35988	0.00106013	CCDC88A, SP100, CAV1, TWF1, GOPC, ANK3, TMSB10, SYNE1
GO:0032970~regulation of actin filament-based process	18	5.30973	0.00106471	EPHA5, NCKAP1, CAMK2D, ROCK1, CAV1, RHOBTB3, TWF1, BRAF, WASL, ADD3, CCDC88A, RASA1, CFL2, PAK2, PAM, TMSB10, PFN2, S100A10
GO:0009058~biosynthetic process	143	42.1829	0.0010796	NDUFA12, PLOD2, IL1RAP, RPL9, RPL36AL, ZNF329, ZNF326, NBN, HMGN3, MAP3K7, SOX4, RPS12, HMGN1, EPHA5, LMO4, CIRBP, CASK, ARID5B, ACSL4, RFX7, SUB1, GUF1, ZNF711, PHIP, ZFPM2, CGGBP1, ASF1A, ENY2, MTMR2, BEX1, GPR87, DDX1, CREM, TWIST1, NTS, HTATSF1, FXR1, RAD21, TPR, DHX36, LPXN, ZC3H15, S100A10, RPL41, CBX3, CAV1, SMARCA5, NR2F1, CDC7, LARP4, SMARCA1, PBX1, CYLD, CCDC88A, PKIA, SP3, REL, PHF14, …
GO:0051254~positive regulation of RNA metabolic process	49	14.4543	0.00108729	TOP2B, BMPR2, HMGB2, PSIP1, WASL, NIPBL, CEP290, HMGN3, SOX4, HMGN1, IL11, SS18, PPP1R12A, LMO4, TCF12, CIRBP, TET2, CKAP2, ARID5B, CASK, EDF1, TFDP2, SUB1, IRF1, PAX9, ZNF711, PHIP, ZFPM2, BIRC2, ASF1A, SP100, ENY2, BEX1, NLRC5, CREM, TWIST1, IFI16, DHX36, S100A10, ATF7IP, SMARCA5, NR2F1, SMARCA1, PBX1, ASXL3, SP3, REL, TCF4, PICALM
GO:1901576~organic substance biosynthetic process	141	41.5929	0.00109624	NDUFA12, PLOD2, IL1RAP, RPL9, RPL36AL, ZNF329, ZNF326, NBN, HMGN3, MAP3K7, SOX4, RPS12, HMGN1, EPHA5, LMO4, CIRBP, CASK, ARID5B, ACSL4, RFX7, SUB1, GUF1, ZNF711, PHIP, ZFPM2, CGGBP1, ASF1A, ENY2, MTMR2, BEX1, GPR87, DDX1, CREM, TWIST1, NTS, HTATSF1, FXR1, RAD21, TPR, DHX36, LPXN, ZC3H15, S100A10, RPL41, CBX3, CAV1, SMARCA5, NR2F1, CDC7, LARP4, SMARCA1, PBX1, CYLD, CCDC88A, PKIA, SP3, REL, PHF14, …
GO:0051099~positive regulation of binding	11	3.24484	0.00116824	NIPBL, ZNF618, USP33, CAV1, SUB1, HMGB2, TWIST1, EDF1, EIF3E, B2M, S100A10
GO:0022904~respiratory electron transport chain	9	2.65487	0.00117335	COX7B, UQCRB, NDUFA5, UQCRQ, NDUFA12, NDUFB4, NDUFB3, NDUFA1, NDUFC1
GO:0032386~regulation of intracellular transport	20	5.89971	0.00119106	SH3GLB1, MTMR2, SP100, LEPROT, TMEM30A, PPP1R12A, BMPR2, ROCK1, CASK, BRAF, ANK3, SNX3, UBL5, SCFD1, PKIA, TPR, TOMM7, IL13RA2, CEP290, PFN2
GO:0042073~intraciliary transport	6	1.76991	0.00124714	DYNC2H1, ARL3, LCA5, IFT57, DYNLL1, WDR35
GO:0009719~response to endogenous stimulus	48	14.1593	0.00125155	ITGB1, LEPROT, BMPR2, ROCK1, TNFAIP6, STXBP3, HMGB2, PTPRK, HDAC9, HSP90B1, UFL1, TUBA1A, GNG2, SESN3, FUNDC1, PEG10, TPR, HAS2, LPXN, SHOC2, AP3S1, ATP7A, PAK2, MAP3K7, B2M, PRKACB, OSBPL8, CDKN2B, ANXA1, CBX3, CAV2, CAV1, TCF12, BRAF, TGFBR2, SOD1, DNAJA1, ACAP2, MMP13, BRMS1L, CAT, COL4A6, PDCD4, LAMTOR2, PHIP, PAM, BIRC2, CPEB4
GO:0007017~microtubule-based process	28	8.25959	0.00126551	ITGB1, DYNC1I2, ROCK1, ARL3, USP33, CAMSAP2, TUBA1A, TPR, AP3S1, SPDL1, IFT57, MPDZ, MAP9, CNTLN, DYNC2H1, SS18, PPP1R12A, LCA5, CKAP2, DYNLL1, WDR35, KTN1, SOD1, CYLD, CCDC88A, NEDD1, CHMP2B, SDCCAG8
GO:0045893~positive regulation of transcription, DNA-templated	47	13.8643	0.00131518	SP100, ENY2, BMPR2, BEX1, NLRC5, HMGB2, CREM, PSIP1, TWIST1, WASL, NIPBL, IFI16, DHX36, HMGN3, CEP290, SOX4, S100A10, HMGN1, ATF7IP, IL11, SS18, PPP1R12A, LMO4, TCF12, TET2, SMARCA5, CKAP2, NR2F1, CASK, ARID5B, EDF1, SMARCA1, PBX1, TFDP2, IRF1, SUB1, ASXL3, SP3, PAX9, REL, ZNF711, TCF4, PHIP, ZFPM2, BIRC2, ASF1A, PICALM
GO:1903508~positive regulation of nucleic acid-templated transcription	47	13.8643	0.00131518	SP100, ENY2, BMPR2, BEX1, NLRC5, HMGB2, CREM, PSIP1, TWIST1, WASL, NIPBL, IFI16, DHX36, HMGN3, CEP290, SOX4, S100A10, HMGN1, ATF7IP, IL11, SS18, PPP1R12A, LMO4, TCF12, TET2, SMARCA5, CKAP2, NR2F1, CASK, ARID5B, EDF1, SMARCA1, PBX1, TFDP2, IRF1, SUB1, ASXL3, SP3, PAX9, REL, ZNF711, TCF4, PHIP, ZFPM2, BIRC2, ASF1A, PICALM
GO:0044403~symbiosis, encompassing mutualism through parasitism	27	7.9646	0.00135067	ITGB1, TOP2B, SP100, ZDHHC20, DDX1, NLRC5, HTATSF1, TANK, IFI44L, SNX3, HERC5, IFI16, DHX36, ITGAV, AZI2, GBP1, GBP3, SRPK2, SSB, CAV2, VTA1, CAV1, IFI44, IRF1, CHMP2B, PKN2, BIRC2
GO:0008219~cell death	57	16.8142	0.00140071	ITGB1, NCKAP1, BMPR2, GBE1, HMGB2, ROBO1, UFL1, TUBA1A, PEG10, ITGAV, NBN, IFT57, MAP3K7, SOX4, SH3GLB1, USP47, EPHA7, ANXA1, TNFRSF12A, LANCL1, CKAP2, DYNLL1, WDR35, TGFBR2, SLTM, RASA1, IRF1, CAT, TAX1BP1, PHIP, EXOC5, ZFPM2, BIRC2, SP100, CAMK2D, ROCK1, TWIST1, UACA, RTN4, HSP90B1, FXR1, IFI16, RAD21, PAK2, SRPK2, CAV1, BRAF, SOD1, DNAJA1, CYLD, CHMP2B, REL, PDCD4, PKN2, MNAT1, CPEB4, PICALM
GO:0009060~aerobic respiration	8	2.35988	0.00142671	UQCRB, NDUFA5, NDUFA12, NDUFB4, NDUFB3, CAT, NDUFA1, NDUFC1
GO:0007009~plasma membrane organization	17	5.01475	0.00142772	ITGB1, SH3GLB1, ROCK1, CAV2, CAV1, ANK3, WASL, FNBP1L, SOD1, CCDC88A, CHMP2B, GOPC, EXOC5, RAB11FIP2, GBP1, S100A10, PICALM
GO:1902680~positive regulation of RNA biosynthetic process	47	13.8643	0.00145345	SP100, ENY2, BMPR2, BEX1, NLRC5, HMGB2, CREM, PSIP1, TWIST1, WASL, NIPBL, IFI16, DHX36, HMGN3, CEP290, SOX4, S100A10, HMGN1, ATF7IP, IL11, SS18, PPP1R12A, LMO4, TCF12, TET2, SMARCA5, CKAP2, NR2F1, CASK, ARID5B, EDF1, SMARCA1, PBX1, TFDP2, IRF1, SUB1, ASXL3, SP3, PAX9, REL, ZNF711, TCF4, PHIP, ZFPM2, BIRC2, ASF1A, PICALM
GO:0032879~regulation of localization	72	21.2389	0.00145551	ITGB1, BMPR2, TNFAIP6, WASL, PTPRK, ROBO1, UBL5, UFL1, NIPBL, AKT3, ITGAV, IL13RA2, ATP7A, B2M, CEP290, TMSB10, HMGN3, SCYL2, SOX4, SH3GLB1, EPHA5, IL11, ANXA1, PPP1R12A, LMO4, CASK, ACSL4, ANK3, DYNLL1, TGFBR2, RAP2B, STIM2, HECW2, PFN2, SP100, CAMK2D, MTMR2, LEPROT, ENY2, STXBP3, ROCK1, TWIST1, PRCP, HDAC9, RTN4, SNX3, SCFD1, TPR, DHX36, HAS2, RAB11FIP2, GBP1, S100A10, OSBPL8, TMEM30A, YTHDF3, …
GO:0006468~protein phosphorylation	51	15.0442	0.00146194	BMPR2, ROBO1, HERC5, RPS6KA6, RSRC1, AKT3, ITGAV, NBN, PRKACB, MAP3K7, SCYL2, EPHA5, IL11, EPHA7, CASK, VRK1, PJA2, TGFBR2, RAP2B, DBF4, PFN2, CAMK2D, ROCK1, TWIST1, TWF1, FXR1, RPS6KC1, PAK2, GBP1, SRPK2, OSBPL8, CDKN2B, CDKN2C, CAV2, CAV1, VEGFC, BRAF, CDC7, CDC42BPA, SOD1, DNAJA1, CYLD, CCDC88A, ETAA1, PKIA, GNAQ, PDCD4, LAMTOR2, TAB2, PKN2, MNAT1
GO:0000281~mitotic cytokinesis	7	2.0649	0.00149164	ROCK1, RASA1, ARL3, CKAP2, ANK3, EXOC5, MAP9
GO:1902903~regulation of supramolecular fiber organization	17	5.01475	0.00149612	NCKAP1, ROCK1, ARL3, CKAP2, TWF1, BRAF, WASL, ADD3, CAMSAP2, CCDC88A, RASA1, CFL2, PFDN4, PAK2, TMSB10, PFN2, S100A10
GO:0010646~regulation of cell communication	83	24.4838	0.00156232	ITGB1, BMPR2, TNFAIP6, USP33, HMGB2, ROBO1, UFL1, RPS6KA6, SESN3, PEG10, AKT3, ITGAV, PRKACB, MAP3K7, HMGN3, SCYL2, SOX4, RPS12, PRMT6, DYNC2H1, EPHA5, IL11, USP47, EPHA7, ANXA1, ARHGEF12, TNFRSF12A, CASK, ACSL4, ANK3, DYNLL1, WDR35, PJA2, TGFBR2, RASA1, IRF1, CAT, PHIP, BIRC2, PFN2, SP100, CAMK2D, MTMR2, LEPROT, ENY2, ROCK1, DDX1, NLRC5, TWIST1, PRCP, NTS, TANK, UACA, RTN4, SNX3, DHX36, LPXN, SH…
GO:0072359~circulatory system development	36	10.6195	0.00158411	ITGB1, SP100, BMPR2, ROCK1, TWIST1, PRCP, HDAC9, RTN4, ROBO1, NIPBL, SGCB, DHX36, AKT3, HAS2, ITGAV, ACADM, ATP7A, IFT57, SOX4, SRPK2, DYNC2H1, ANXA1, TNFRSF12A, LMO4, CAV1, VEGFC, ARHGAP24, TGFBR2, NELL2, TFDP2, RASA1, PDCD4, TAB2, MNAT1, ZFPM2, PAM
GO:0006900~membrane budding	8	2.35988	0.00159834	SNX3, VTA1, CHMP2B, WASL, AP3S1, FNBP1L, S100A10, PICALM
GO:0010631~epithelial cell migration	16	4.71976	0.00163941	ITGB1, SP100, ANXA1, BMPR2, ROCK1, VEGFC, PRCP, HDAC9, RTN4, TGFBR2, ROBO1, AKT3, LPXN, HAS2, PKN2, PFN2
GO:0044419~interspecies interaction between organisms	27	7.9646	0.00163965	ITGB1, TOP2B, SP100, ZDHHC20, DDX1, NLRC5, HTATSF1, TANK, IFI44L, SNX3, HERC5, IFI16, DHX36, ITGAV, AZI2, GBP1, GBP3, SRPK2, SSB, CAV2, VTA1, CAV1, IFI44, IRF1, CHMP2B, PKN2, BIRC2
GO:0045944~positive regulation of transcription from RNA polymerase II promoter	37	10.9145	0.00167437	BMPR2, BEX1, NLRC5, HMGB2, CREM, PSIP1, TWIST1, WASL, NIPBL, IFI16, DHX36, HMGN3, SOX4, S100A10, IL11, SS18, PPP1R12A, LMO4, TCF12, TET2, SMARCA5, CKAP2, NR2F1, CASK, SMARCA1, PBX1, TFDP2, IRF1, SUB1, ASXL3, SP3, PAX9, REL, ZNF711, TCF4, PHIP, ZFPM2
GO:0001944~vasculature development	27	7.9646	0.00169634	ITGB1, SP100, BMPR2, ROCK1, TWIST1, PRCP, HDAC9, RTN4, ROBO1, SGCB, AKT3, HAS2, ITGAV, ATP7A, SOX4, SRPK2, DYNC2H1, ANXA1, TNFRSF12A, CAV1, VEGFC, ARHGAP24, TGFBR2, NELL2, RASA1, PDCD4, ZFPM2
GO:0030029~actin filament-based process	27	7.9646	0.00169634	ITGB1, NCKAP1, CAMK2D, ROCK1, RHOBTB3, TWF1, WASL, FNBP1L, ADD3, HSP90B1, CFL2, PHACTR2, HMCN1, PAK2, TMSB10, S100A10, EPHA5, ANXA1, CAV1, BRAF, CDC42BPA, ENAH, CCDC88A, ACAP2, RASA1, PAM, PFN2
GO:0072358~cardiovascular system development	27	7.9646	0.00169634	ITGB1, SP100, BMPR2, ROCK1, TWIST1, PRCP, HDAC9, RTN4, ROBO1, SGCB, AKT3, HAS2, ITGAV, ATP7A, SOX4, SRPK2, DYNC2H1, ANXA1, TNFRSF12A, CAV1, VEGFC, ARHGAP24, TGFBR2, NELL2, RASA1, PDCD4, ZFPM2
GO:0051049~regulation of transport	50	14.7493	0.00170654	ITGB1, BMPR2, WASL, UBL5, ITGAV, IL13RA2, ATP7A, B2M, CEP290, HMGN3, SCYL2, SOX4, SH3GLB1, EPHA5, IL11, ANXA1, PPP1R12A, CASK, ACSL4, ANK3, DYNLL1, STIM2, HECW2, PFN2, SP100, CAMK2D, MTMR2, LEPROT, ENY2, STXBP3, ROCK1, TWIST1, SNX3, SCFD1, TPR, S100A10, OSBPL8, TMEM30A, CAV1, VEGFC, BRAF, SOD1, DNAJA1, PKIA, C4ORF3, TOMM7, NDUFAF2, GOPC, PAM, PICALM
GO:0071363~cellular response to growth factor stimulus	25	7.37463	0.0017431	BMPR2, TNFAIP6, TWIST1, PTPRK, ROBO1, PEG10, HAS2, LPXN, SHOC2, ATP7A, PAK2, MAP3K7, CDKN2B, ANXA1, CAV2, CAV1, VEGFC, CASK, BRAF, TGFBR2, ACAP2, BRMS1L, CAT, PAX9, PDCD4
GO:0090132~epithelium migration	16	4.71976	0.00175373	ITGB1, SP100, ANXA1, BMPR2, ROCK1, VEGFC, PRCP, HDAC9, RTN4, TGFBR2, ROBO1, AKT3, LPXN, HAS2, PKN2, PFN2
GO:0010564~regulation of cell cycle process	24	7.07965	0.00177035	SH3GLB1, USP47, CDKN2B, CDKN2C, ANXA1, CAV2, SMARCA5, CDC7, PBX1, NIPBL, DBF4, PKIA, HECW2, RAD21, TPR, CHMP2B, RAD17, PHIP, PKN2, NBN, SPDL1, MNAT1, SOX4, MAP9
GO:0031399~regulation of protein modification process	51	15.0442	0.00177262	BMPR2, UBXN2A, ROBO1, HERC5, UFL1, RPS6KA6, NIPBL, NBN, MAP3K7, SOX4, PRMT6, IL11, EPHA7, PPP1R12A, PJA2, TGFBR2, RAP2B, DBF4, PHIP, BIRC2, PFN2, CAMK2D, DCUN1D5, ROCK1, TWIST1, TWF1, TANK, HSP90B1, FXR1, PAK2, GBP1, OSBPL8, CDKN2B, CDKN2C, CAV2, CAV1, SMARCA5, VEGFC, BRAF, SOD1, DNAJA1, CYLD, CCDC88A, ETAA1, PKIA, GNAQ, PDCD4, LAMTOR2, TAB2, RPS20, MNAT1
GO:0051179~localization	137	40.413	0.00177506	NCKAP1, NDUFA12, FNBP1L, CFL2, PEG10, AKT3, IL13RA2, B2M, HMGN3, TMSB10, SLC35A5, SOX4, DYNC2H1, SH3GLB1, EPHA5, LMO4, CASK, ARID5B, ACSL4, ANK3, ACAP2, STIM2, HECW2, PFN2, FTL, ENY2, MTMR2, STXBP3, YTHDC1, DDX1, ARL3, RHOBTB3, TWIST1, TWF1, VPS26A, RTN4, HSP90B1, SNX3, SCFD1, SNX2, RAD21, TPR, DHX36, LPXN, RAB11FIP2, SNX7, CNTLN, S100A10, OSBPL8, CAV2, VTA1, CAV1, NBEAL1, BRAF, ARHGAP24, CCDC88A…
GO:0060322~head development	28	8.25959	0.00181278	ITGB1, TOP2B, BMPR2, STXBP3, RTN4, ROBO1, NIPBL, TUBA1A, AKT3, ATP7A, B2M, CEP290, SCYL2, DYNC2H1, EPHA5, EPHA7, PCDH9, DDX10, ARID5B, BRAF, SMARCA1, DYNLL1, PBX1, TGFBR2, UQCRQ, PAX9, GNB4, MNAT1
GO:0060317~cardiac epithelial to mesenchymal transition	5	1.47493	0.00181666	PDCD4, TWIST1, HAS2, RTN4, TGFBR2
GO:0000904~cell morphogenesis involved in differentiation	25	7.37463	0.00188752	ITGB1, TOP2B, BMPR2, ROCK1, USP33, WASL, RTN4, ROBO1, DHX36, HAS2, LPXN, ITGAV, PAK2, GBP1, S100A10, EPHA5, EPHA7, LMO4, BRAF, ANK3, SOD1, NELL2, ENAH, HECW2, PICALM
GO:0012501~programmed cell death	53	15.6342	0.0019426	ITGB1, NCKAP1, BMPR2, GBE1, HMGB2, ROBO1, UFL1, TUBA1A, PEG10, ITGAV, NBN, IFT57, MAP3K7, SOX4, SH3GLB1, USP47, EPHA7, ANXA1, TNFRSF12A, LANCL1, CKAP2, DYNLL1, WDR35, TGFBR2, SLTM, RASA1, IRF1, CAT, TAX1BP1, PHIP, EXOC5, BIRC2, SP100, CAMK2D, ROCK1, TWIST1, UACA, RTN4, HSP90B1, FXR1, IFI16, RAD21, PAK2, SRPK2, CAV1, BRAF, SOD1, DNAJA1, CYLD, PDCD4, PKN2, MNAT1, CPEB4
GO:0007167~enzyme linked receptor protein signaling pathway	31	9.14454	0.00194378	LEPROT, BMPR2, TNFAIP6, PTPRK, RTN4, ROBO1, PEG10, LPXN, SHOC2, AP3S1, PAK2, MAP3K7, EPHA5, OSBPL8, SS18, CDKN2B, EPHA7, CAV2, CAV1, VEGFC, ARID5B, BRAF, TGFBR2, CCDC88A, BRMS1L, RASA1, SUB1, COL4A6, PHF14, PDCD4, PHIP
GO:0071705~nitrogen compound transport	56	16.5192	0.00200362	ITGB1, BMPR2, UBL5, TUBA1A, PEG10, AP3S1, TNPO1, IFT57, CEP290, HMGN3, SLC35A5, SOX4, SH3GLB1, DYNC2H1, EPHA5, ANXA1, ACSL4, ANK3, DYNLL1, WDR35, TGFBR2, EXOC5, SP100, LEPROT, ENY2, STXBP3, ZDHHC20, YTHDC1, ARL3, VPS26A, HSP90B1, SNX3, SCFD1, SNX2, TPR, IGF2BP3, CHML, SNX7, RAB11FIP2, ANKRD50, TMEM30A, SSB, VTA1, CAV1, LCA5, VEGFC, KTN1, DNAJA1, APPBP2, PKIA, HNRNPA2B1, CHMP2B, TOMM7, NDUFAF2, GO…
GO:0071822~protein complex subunit organization	39	11.5044	0.00200888	NCKAP1, NDUFA12, ARL3, NDUFB4, NDUFB3, TWIST1, TWF1, WASL, ADD3, RTN4, CAMSAP2, TUBA1A, CFL2, PEG10, TPR, DHX36, ATP7A, TMSB10, B2M, SH3GLB1, ATF7IP, NDUFA5, LMO4, VTA1, NDUFA1, CKAP2, NDUFC1, TBCA, KCTD3, NEDD1, P4HA1, RASA1, SUB1, CHMP2B, NDUFAF2, TLL1, BIRC2, PFN2, PICALM
GO:0034097~response to cytokine	30	8.84956	0.00201922	SP100, STXBP3, UBXN2A, NLRC5, IL1RAP, TANK, ROBO1, TUBA1A, IFI16, TPR, HAS2, IL13RA2, AZI2, GBP1, MAP3K7, ZC3H15, GBP3, CDKN2B, ANXA1, YTHDF3, CAV1, SMARCA5, VEGFC, ARID5B, ACSL4, WDR35, CYLD, IRF1, REL, BIRC2
GO:0090130~tissue migration	16	4.71976	0.00203718	ITGB1, SP100, ANXA1, BMPR2, ROCK1, VEGFC, PRCP, HDAC9, RTN4, TGFBR2, ROBO1, AKT3, LPXN, HAS2, PKN2, PFN2
GO:0003179~heart valve morphogenesis	6	1.76991	0.00209952	BMPR2, ROCK1, TWIST1, SOX4, TGFBR2, ROBO1
GO:0050678~regulation of epithelial cell proliferation	17	5.01475	0.0021133	CDKN2B, BMPR2, CAV2, CAV1, HMGB2, VEGFC, TWIST1, CASK, PTPRK, RTN4, ROBO1, AKT3, HAS2, IFT57, ATP7A, B2M, HMGN1
GO:0033044~regulation of chromosome organization	18	5.30973	0.00215418	PRMT6, ATF7IP, CAMK2D, SMARCA5, TWIST1, SMC6, NIPBL, SUB1, HECW2, RAD21, TPR, DHX36, HNRNPA2B1, POT1, NBN, SPDL1, MNAT1, ASF1A
GO:0006796~phosphate-containing compound metabolic process	75	22.1239	0.00226681	COX7B, BMPR2, NDUFA12, PTPN21, PTPRK, ROBO1, HERC5, RPS6KA6, RSRC1, AKT3, ITGAV, NBN, ATP7A, PRKACB, MAP3K7, SCYL2, EPHA5, IL11, EPHA7, PPP1R12A, LMO4, CASK, VRK1, ACYP2, NDUFC1, DYNLL1, PJA2, TGFBR2, RAP2B, DBF4, PHIP, PFN2, CAMK2D, MTMR2, ROCK1, UQCRB, GPR87, NDUFB4, NDUFB3, NLRC5, TWIST1, TWF1, HSP90B1, FXR1, RPS6KC1, PAK2, GBP1, SRPK2, OSBPL8, CDKN2B, CDKN2C, NDUFA5, CAV2, CAV1, NDUFA1, VEGFC…
GO:0010970~transport along microtubule	10	2.94985	0.0022756	DYNC2H1, DYNC1I2, TUBA1A, ARL3, LCA5, AP3S1, IFT57, DYNLL1, WDR35, SOD1
GO:0032956~regulation of actin cytoskeleton organization	16	4.71976	0.0023004	EPHA5, NCKAP1, ROCK1, RHOBTB3, TWF1, BRAF, WASL, ADD3, CCDC88A, RASA1, CFL2, PAK2, PAM, TMSB10, PFN2, S100A10
GO:0019220~regulation of phosphate metabolic process	48	14.1593	0.00232602	MTMR2, BMPR2, ROCK1, GPR87, NLRC5, TWIST1, TWF1, ROBO1, HSP90B1, FXR1, HERC5, RPS6KA6, NBN, ATP7A, PAK2, GBP1, MAP3K7, EPHA5, OSBPL8, IL11, CDKN2B, EPHA7, CDKN2C, PPP1R12A, CAV2, LMO4, CAV1, VEGFC, BRAF, DYNLL1, PJA2, TGFBR2, SOD1, DNAJA1, ETAA1, CYLD, CCDC88A, RAP2B, DBF4, PKIA, GNAQ, PDCD4, RAD17, TAB2, LAMTOR2, PHIP, MNAT1, PFN2
GO:0006357~regulation of transcription from RNA polymerase II promoter	66	19.469	0.00233792	BMPR2, TNFAIP6, HMGB2, PSIP1, WASL, PHF6, NIPBL, ZNF329, HMGN3, SOX4, HMGN1, PRMT6, IL11, SS18, PPP1R12A, LMO4, TCF12, TET2, CKAP2, ARID5B, CASK, ZHX1, SLTM, TFDP2, RFX7, SUB1, IRF1, PAX9, ZNF711, PHIP, ZFPM2, CGGBP1, SP100, CAMK2D, ENY2, BEX1, NLRC5, CREM, TWIST1, HTATSF1, HDAC9, RNF2, IFI16, RAD21, TPR, DHX36, S100A10, ATF7IP, CBX3, CAV1, SMARCA5, NR2F1, SMARCA1, PBX1, ASXL3, PKIA, BRMS1L, SP3,…
GO:0001570~vasculogenesis	7	2.0649	0.00235682	RASA1, CAV1, HAS2, ITGAV, ZFPM2, RTN4, TGFBR2
GO:0009628~response to abiotic stimulus	35	10.3245	0.00235717	ITGB1, PSIP1, TWIST1, PLOD2, PTPRK, TANK, RTN4, HSP90B1, SCFD1, NIPBL, TUBA1A, IFI16, FUNDC1, TPR, DHX36, USP1, ACADM, ATP7A, HMGN1, USP47, ANXA1, CAV1, CIRBP, FBXL17, VEGFC, BRAF, TGFBR2, SOD1, DNAJA1, IRF1, GNAQ, CAT, PAM, BIRC2, CPEB4
GO:0099111~microtubule-based transport	10	2.94985	0.00236721	DYNC2H1, DYNC1I2, TUBA1A, ARL3, LCA5, AP3S1, IFT57, DYNLL1, WDR35, SOD1
GO:0051960~regulation of nervous system development	30	8.84956	0.00241327	ITGB1, MTMR2, BMPR2, ROCK1, HMGB2, TWF1, IL1RAP, RTN4, ROBO1, CAMSAP2, SNX3, UFL1, NIPBL, DHX36, PAK2, B2M, PRKACB, S100A10, CDKN2B, EPHA7, TMEM30A, TCF12, NR2F1, VEGFC, NAP1L1, BRAF, PBX1, CCDC88A, HECW2, TCF4
GO:0040011~locomotion	52	15.3392	0.00241885	ITGB1, NCKAP1, TOP2B, BMPR2, TNFAIP6, USP33, HMGB2, WASL, PTPRK, ROBO1, NIPBL, TUBA1A, CFL2, AKT3, ITGAV, SPDL1, ATP7A, TMSB10, EPHA5, EPHA7, ANXA1, LMO4, ARID5B, TGFBR2, ENAH, RAP2B, SDCCAG8, PFN2, SP100, ROCK1, RHOBTB3, TWIST1, PRCP, HDAC9, RTN4, LPXN, HAS2, OSBPL8, YTHDF3, CAV2, CAV1, VEGFC, BRAF, CDC42BPA, ARHGAP24, NELL2, DNAJA1, CCDC88A, BRMS1L, CHMP2B, LAMTOR2, PKN2
GO:0051174~regulation of phosphorus metabolic process	48	14.1593	0.00244617	MTMR2, BMPR2, ROCK1, GPR87, NLRC5, TWIST1, TWF1, ROBO1, HSP90B1, FXR1, HERC5, RPS6KA6, NBN, ATP7A, PAK2, GBP1, MAP3K7, EPHA5, OSBPL8, IL11, CDKN2B, EPHA7, CDKN2C, PPP1R12A, CAV2, LMO4, CAV1, VEGFC, BRAF, DYNLL1, PJA2, TGFBR2, SOD1, DNAJA1, ETAA1, CYLD, CCDC88A, RAP2B, DBF4, PKIA, GNAQ, PDCD4, RAD17, TAB2, LAMTOR2, PHIP, MNAT1, PFN2
GO:0051301~cell division	22	6.48968	0.00250998	SH3GLB1, ROCK1, ARL3, CKAP2, VEGFC, VRK1, CDC7, ANK3, WASL, NEDD1, TUBA1A, MIS18BP1, RASA1, RAD21, TPR, CAT, PKN2, HMCN1, EXOC5, SPDL1, MAP9, LRRCC1
GO:0042325~regulation of phosphorylation	44	12.9794	0.0026664	BMPR2, ROCK1, NLRC5, TWIST1, TWF1, ROBO1, FXR1, HERC5, RPS6KA6, NBN, ATP7A, PAK2, GBP1, MAP3K7, EPHA5, OSBPL8, IL11, CDKN2B, EPHA7, CDKN2C, CAV2, LMO4, CAV1, VEGFC, BRAF, DYNLL1, PJA2, TGFBR2, SOD1, DNAJA1, ETAA1, CYLD, CCDC88A, RAP2B, DBF4, PKIA, GNAQ, PDCD4, RAD17, TAB2, LAMTOR2, PHIP, MNAT1, PFN2
GO:1903829~positive regulation of cellular protein localization	15	4.42478	0.00267693	ITGB1, SH3GLB1, LEPROT, TMEM30A, BMPR2, TNFAIP6, ANK3, RTN4, UBL5, CCDC88A, NIPBL, TPR, TOMM7, RAB11FIP2, CEP290
GO:0018105~peptidyl-serine phosphorylation	14	4.12979	0.00270427	SRPK2, IL11, CAMK2D, ROCK1, CAV1, BRAF, VRK1, CDC7, TGFBR2, RPS6KA6, AKT3, PKN2, PAK2, PFN2
GO:1903827~regulation of cellular protein localization	21	6.19469	0.00275319	ITGB1, SH3GLB1, SP100, LEPROT, TMEM30A, BMPR2, TNFAIP6, ANK3, RTN4, DNAJA1, UBL5, CCDC88A, NIPBL, PKIA, TPR, TOMM7, GOPC, RAB11FIP2, GBP1, CEP290, PICALM
GO:0032507~maintenance of protein location in cell	7	2.0649	0.00282538	CCDC88A, CAV1, TWF1, GOPC, ANK3, TMSB10, SYNE1
GO:0006886~intracellular protein transport	32	9.43953	0.00284331	SP100, LEPROT, ENY2, BMPR2, STXBP3, ZDHHC20, YTHDC1, ARL3, VPS26A, HSP90B1, UBL5, SCFD1, TUBA1A, SNX2, TPR, AP3S1, CHML, TNPO1, IFT57, CEP290, SH3GLB1, DYNC2H1, TMEM30A, SSB, LCA5, ANK3, DYNLL1, WDR35, APPBP2, PKIA, HNRNPA2B1, TOMM7
GO:0006997~nucleus organization	9	2.65487	0.00284577	SRPK2, OSBPL8, UBXN2A, TPR, CHMP2B, HMGB2, VRK1, RTN4, SYNE1
GO:0051651~maintenance of location in cell	8	2.35988	0.00284818	CCDC88A, CAV1, TWF1, GOPC, ANK3, TMSB10, FTL, SYNE1
GO:0044772~mitotic cell cycle phase transition	18	5.30973	0.00289666	ITGB1, USP47, CDKN2B, CDKN2C, ANXA1, FBXL17, CDC7, PBX1, DBF4, PKIA, HECW2, RAD21, TPR, RAD17, NBN, SPDL1, MNAT1, SOX4
GO:0016477~cell migration	42	12.3894	0.00297217	ITGB1, NCKAP1, TOP2B, SP100, BMPR2, ROCK1, TNFAIP6, USP33, HMGB2, RHOBTB3, TWIST1, PRCP, WASL, PTPRK, HDAC9, RTN4, ROBO1, NIPBL, TUBA1A, AKT3, HAS2, LPXN, ITGAV, SPDL1, ATP7A, OSBPL8, ANXA1, YTHDF3, CAV1, VEGFC, ARID5B, BRAF, CDC42BPA, ARHGAP24, TGFBR2, CCDC88A, RAP2B, BRMS1L, PKN2, LAMTOR2, PFN2, SDCCAG8
GO:0030073~insulin secretion	10	2.94985	0.00297499	EPHA5, ENY2, ANXA1, STXBP3, NDUFAF2, ACSL4, RAB11FIP2, DYNLL1, HMGN3, SOX4
GO:0051674~localization of cell	47	13.8643	0.00305267	ITGB1, NCKAP1, TOP2B, SP100, BMPR2, ROCK1, TNFAIP6, USP33, HMGB2, RHOBTB3, TWIST1, PRCP, WASL, PTPRK, HDAC9, RTN4, ROBO1, NIPBL, TUBA1A, CFL2, AKT3, HAS2, LPXN, ITGAV, SPDL1, ATP7A, TMSB10, OSBPL8, ANXA1, YTHDF3, LMO4, CAV1, VEGFC, ARID5B, BRAF, CDC42BPA, ARHGAP24, TGFBR2, DNAJA1, ENAH, CCDC88A, RAP2B, BRMS1L, PKN2, LAMTOR2, PFN2, SDCCAG8
GO:0048870~cell motility	47	13.8643	0.00305267	ITGB1, NCKAP1, TOP2B, SP100, BMPR2, ROCK1, TNFAIP6, USP33, HMGB2, RHOBTB3, TWIST1, PRCP, WASL, PTPRK, HDAC9, RTN4, ROBO1, NIPBL, TUBA1A, CFL2, AKT3, HAS2, LPXN, ITGAV, SPDL1, ATP7A, TMSB10, OSBPL8, ANXA1, YTHDF3, LMO4, CAV1, VEGFC, ARID5B, BRAF, CDC42BPA, ARHGAP24, TGFBR2, DNAJA1, ENAH, CCDC88A, RAP2B, BRMS1L, PKN2, LAMTOR2, PFN2, SDCCAG8
GO:0023051~regulation of signaling	82	24.1888	0.0030997	ITGB1, BMPR2, TNFAIP6, USP33, HMGB2, ROBO1, UFL1, RPS6KA6, SESN3, PEG10, AKT3, ITGAV, PRKACB, MAP3K7, HMGN3, SCYL2, SOX4, RPS12, PRMT6, DYNC2H1, EPHA5, IL11, USP47, EPHA7, ANXA1, ARHGEF12, TNFRSF12A, CASK, ACSL4, DYNLL1, WDR35, PJA2, TGFBR2, RASA1, IRF1, CAT, PHIP, BIRC2, PFN2, SP100, CAMK2D, MTMR2, LEPROT, ENY2, ROCK1, DDX1, NLRC5, TWIST1, PRCP, NTS, TANK, UACA, RTN4, SNX3, DHX36, LPXN, SHOC2, P…
GO:0006793~phosphorus metabolic process	76	22.4189	0.00314882	COX7B, BMPR2, NDUFA12, PTPN21, PTPRK, ROBO1, HERC5, RPS6KA6, RSRC1, AKT3, ITGAV, NBN, ATP7A, PRKACB, MAP3K7, SCYL2, EPHA5, IL11, EPHA7, PPP1R12A, LMO4, CASK, ACSL4, VRK1, ACYP2, NDUFC1, DYNLL1, PJA2, TGFBR2, RAP2B, DBF4, PHIP, PFN2, CAMK2D, MTMR2, ROCK1, UQCRB, GPR87, NDUFB4, NDUFB3, NLRC5, TWIST1, TWF1, HSP90B1, FXR1, RPS6KC1, PAK2, GBP1, SRPK2, OSBPL8, CDKN2B, CDKN2C, NDUFA5, CAV2, CAV1, NDUFA1…
GO:0050767~regulation of neurogenesis	27	7.9646	0.0032425	ITGB1, BMPR2, ROCK1, HMGB2, TWF1, RTN4, ROBO1, CAMSAP2, SNX3, UFL1, NIPBL, DHX36, PAK2, B2M, S100A10, CDKN2B, EPHA7, TMEM30A, TCF12, NR2F1, VEGFC, NAP1L1, BRAF, PBX1, CCDC88A, HECW2, TCF4
GO:0043549~regulation of kinase activity	27	7.9646	0.00327655	BMPR2, NLRC5, ROBO1, HERC5, NBN, PAK2, MAP3K7, EPHA5, OSBPL8, CDKN2B, EPHA7, CDKN2C, LMO4, CAV1, VEGFC, TGFBR2, SOD1, DNAJA1, ETAA1, CCDC88A, RAP2B, DBF4, PKIA, GNAQ, PDCD4, TAB2, MNAT1
GO:1901990~regulation of mitotic cell cycle phase transition	15	4.42478	0.00328073	USP47, CDKN2B, CDKN2C, ANXA1, CDC7, PBX1, PKIA, HECW2, RAD21, TPR, RAD17, NBN, SPDL1, MNAT1, SOX4
GO:0006259~DNA metabolic process	32	9.43953	0.00336779	TOP2B, SP100, ENY2, BMPR2, DDX1, HMGB2, TWIST1, SMC6, UFL1, NIPBL, RAD21, DHX36, USP1, NBN, DTD1, HMGN1, PRMT6, ATF7IP, USP47, TET2, SMARCA5, NAP1L1, CDC7, ETAA1, CCDC88A, DBF4, SUB1, HNRNPA2B1, POT1, RAD17, MNAT1, ASF1A
GO:0031175~neuron projection development	29	8.55457	0.00341473	ITGB1, NCKAP1, TOP2B, BMPR2, ROCK1, USP33, TWF1, WASL, PTPRK, RTN4, ROBO1, CAMSAP2, SNX3, DHX36, ATP7A, PAK2, B2M, EPHA5, EPHA7, TMEM30A, LMO4, NR2F1, ACSL4, BRAF, ANK3, NELL2, ENAH, HECW2, PICALM
GO:0032270~positive regulation of cellular protein metabolic process	45	13.2743	0.00341877	BMPR2, ROCK1, DCUN1D5, TANK, UACA, ROBO1, FXR1, NIPBL, SH3BGRL, IFI16, DHX36, NBN, IFT57, PAK2, MAP3K7, SOX4, S100A10, OSBPL8, IL11, EPHA7, PPP1R12A, YTHDF3, CAV2, CAV1, CIRBP, SMARCA5, VEGFC, BRAF, LARP4, WDR35, PJA2, TGFBR2, SOD1, ETAA1, CCDC88A, RAP2B, DBF4, GUF1, TAB2, LAMTOR2, EIF3E, MNAT1, BIRC2, PFN2, PICALM
GO:0048534~hematopoietic or lymphoid organ development	29	8.55457	0.00344483	ITGB1, TOP2B, TNFAIP6, HMGB2, PTPRK, HDAC9, UFL1, IFI16, DHX36, AZI2, ATP7A, B2M, SOX4, PRMT6, IL11, CDKN2B, ANXA1, LMO4, TET2, BRAF, PBX1, PTBP3, TGFBR2, SOD1, IRF1, SP3, C12ORF29, PHF14, PICALM
GO:0071709~membrane assembly	5	1.47493	0.00345113	CAV2, CAV1, ANK3, S100A10, PICALM
GO:0031503~protein complex localization	7	2.0649	0.00355446	DYNC2H1, ARL3, LCA5, WASL, IFT57, DYNLL1, WDR35
GO:0051345~positive regulation of hydrolase activity	22	6.48968	0.00358511	ITGB1, PPP1R12A, ROCK1, CAV2, CAV1, HMGB2, DYNLL1, WDR35, UACA, TANK, ARHGAP24, ROBO1, IFI16, RASA1, GNAQ, POT1, IFT57, RAB11FIP2, ZC3H15, PFN2, S100A10, PICALM
GO:1901987~regulation of cell cycle phase transition	16	4.71976	0.00365742	USP47, CDKN2B, CDKN2C, ANXA1, CDC7, PBX1, DBF4, PKIA, HECW2, RAD21, TPR, RAD17, NBN, SPDL1, MNAT1, SOX4
GO:0043484~regulation of RNA splicing	10	2.94985	0.00369209	FXR1, SRPK2, ENY2, YTHDC1, HNRNPA2B1, CIRBP, ZNF326, HNRNPH2, HNRNPH3, PTBP3
GO:0030097~hemopoiesis	28	8.25959	0.00376013	ITGB1, TOP2B, TNFAIP6, HMGB2, PTPRK, HDAC9, UFL1, IFI16, DHX36, AZI2, ATP7A, B2M, SOX4, PRMT6, IL11, CDKN2B, ANXA1, TET2, BRAF, PBX1, PTBP3, TGFBR2, SOD1, IRF1, SP3, C12ORF29, PHF14, PICALM
GO:0060284~regulation of cell development	30	8.84956	0.00379849	ITGB1, BMPR2, ROCK1, HMGB2, TWF1, HDAC9, RTN4, ROBO1, CAMSAP2, SNX3, UFL1, NIPBL, DHX36, HAS2, PAK2, GBP1, B2M, S100A10, CDKN2B, EPHA7, TMEM30A, TCF12, NR2F1, VEGFC, NAP1L1, BRAF, PBX1, CCDC88A, HECW2, TCF4
GO:0048583~regulation of response to stimulus	95	28.0236	0.00395261	ITGB1, BMPR2, TNFAIP6, USP33, HMGB2, ROBO1, HERC5, UFL1, RPS6KA6, SESN3, PEG10, AKT3, ITGAV, IL13RA2, ATP7A, B2M, PRKACB, MAP3K7, HMGN3, SCYL2, SOX4, RPS12, PRMT6, DYNC2H1, EPHA5, IL11, USP47, EPHA7, ANXA1, ARHGEF12, TNFRSF12A, LANCL1, CASK, DYNLL1, WDR35, PJA2, TGFBR2, RASA1, IRF1, CAT, POT1, PHIP, BIRC2, SP100, CAMK2D, MTMR2, LEPROT, ENY2, ROCK1, DDX1, NLRC5, TWIST1, TWF1, PRCP, NTS, TANK, UACA…
GO:0002520~immune system development	30	8.84956	0.00414015	ITGB1, TOP2B, TNFAIP6, HMGB2, PTPRK, HDAC9, UFL1, IFI16, DHX36, NBN, AZI2, ATP7A, B2M, SOX4, PRMT6, IL11, CDKN2B, ANXA1, LMO4, TET2, BRAF, PBX1, PTBP3, TGFBR2, SOD1, IRF1, SP3, C12ORF29, PHF14, PICALM
GO:0009966~regulation of signal transduction	73	21.5339	0.00414909	ITGB1, BMPR2, TNFAIP6, USP33, HMGB2, ROBO1, UFL1, RPS6KA6, SESN3, PEG10, AKT3, ITGAV, PRKACB, MAP3K7, SCYL2, SOX4, RPS12, PRMT6, DYNC2H1, IL11, USP47, EPHA7, ARHGEF12, TNFRSF12A, WDR35, PJA2, TGFBR2, RASA1, IRF1, CAT, PHIP, BIRC2, SP100, CAMK2D, MTMR2, LEPROT, ROCK1, DDX1, NLRC5, TWIST1, PRCP, NTS, TANK, UACA, RTN4, SNX3, DHX36, LPXN, SHOC2, PAK2, GBP1, OSBPL8, CDKN2B, YTHDF3, CAV2, CAV1, FBXL17,…
GO:0051235~maintenance of location	14	4.12979	0.00434062	OSBPL8, SP100, CAMK2D, ANXA1, CAV1, TWF1, ANK3, HSP90B1, SYNE1, CCDC88A, GOPC, ITGAV, TMSB10, FTL
GO:0003170~heart valve development	6	1.76991	0.00436222	BMPR2, ROCK1, TWIST1, SOX4, TGFBR2, ROBO1
GO:0042776~mitochondrial ATP synthesis coupled proton transport	6	1.76991	0.00436222	NDUFA5, NDUFA12, NDUFB4, NDUFB3, NDUFA1, NDUFC1
GO:1901698~response to nitrogen compound	32	9.43953	0.00459757	LEPROT, ROCK1, STXBP3, DDX1, HDAC9, HSP90B1, UFL1, TUBA1A, GNG2, SESN3, FUNDC1, DHX36, AP3S1, ATP7A, B2M, PRKACB, OSBPL8, ANXA1, CAV2, CAV1, TCF12, BRAF, SOD1, MMP13, GNAQ, CAT, HNRNPA2B1, COL4A6, LAMTOR2, PHIP, BIRC2, CPEB4
GO:0007015~actin filament organization	17	5.01475	0.00471884	NCKAP1, ROCK1, RHOBTB3, TWF1, BRAF, WASL, ADD3, HSP90B1, ENAH, CCDC88A, RASA1, CFL2, HMCN1, PAK2, TMSB10, PFN2, S100A10
GO:0022604~regulation of cell morphogenesis	18	5.30973	0.0047978	EPHA7, ANXA1, BMPR2, RHOBTB3, BRAF, LARP4, RTN4, MYL12B, ROBO1, PALMD, RASA1, HECW2, DHX36, HAS2, PHIP, PAK2, GBP1, S100A10
GO:0030098~lymphocyte differentiation	16	4.71976	0.00481246	ITGB1, IL11, TOP2B, ANXA1, BRAF, PTPRK, HDAC9, PBX1, TGFBR2, SOD1, IRF1, SP3, PHF14, ATP7A, B2M, SOX4
GO:0051347~positive regulation of transferase activity	22	6.48968	0.00490714	EPHA5, OSBPL8, EPHA7, BMPR2, DCUN1D5, LMO4, VEGFC, TGFBR2, ROBO1, SOD1, ETAA1, CCDC88A, DBF4, HNRNPA2B1, POT1, SERINC1, TAB2, NBN, MNAT1, MAP3K7, PAK2, HMGN1
GO:0051246~regulation of protein metabolic process	78	23.0088	0.00496339	BMPR2, UBXN2A, ROBO1, HERC5, UFL1, RPS6KA6, NIPBL, ITGAV, NBN, IFT57, PRKACB, MAP3K7, SOX4, PRMT6, IL11, EIF5B, USP47, EPHA7, PPP1R12A, CIRBP, WDR35, PJA2, TGFBR2, RAP2B, DBF4, HECW2, GUF1, PHIP, PFDN4, BIRC2, PFN2, CAMK2D, DCUN1D5, ROCK1, DDX1, TWIST1, TWF1, TANK, UACA, RTN4, HSP90B1, SNX3, FXR1, SH3BGRL, IFI16, TPR, DHX36, IGF2BP3, PAK2, GBP1, S100A10, USP25, OSBPL8, CDKN2B, CDKN2C, YTHDF3, CAV…
GO:0018209~peptidyl-serine modification	14	4.12979	0.00501894	SRPK2, IL11, CAMK2D, ROCK1, CAV1, BRAF, VRK1, CDC7, TGFBR2, RPS6KA6, AKT3, PKN2, PAK2, PFN2
GO:0044839~cell cycle G2/M phase transition	9	2.65487	0.00516217	USP47, CDKN2B, PKIA, RAD21, FBXL17, RAD17, CDC7, NBN, PBX1
GO:0051247~positive regulation of protein metabolic process	46	13.5693	0.0053705	BMPR2, ROCK1, DCUN1D5, TANK, UACA, ROBO1, FXR1, NIPBL, SH3BGRL, IFI16, DHX36, NBN, IFT57, PAK2, MAP3K7, SOX4, S100A10, OSBPL8, IL11, EPHA7, PPP1R12A, YTHDF3, CAV2, CAV1, CIRBP, SMARCA5, VEGFC, BRAF, LARP4, WDR35, PJA2, TGFBR2, SOD1, ETAA1, CCDC88A, RAP2B, DBF4, HECW2, GUF1, TAB2, LAMTOR2, EIF3E, MNAT1, BIRC2, PFN2, PICALM
GO:1905462~regulation of DNA duplex unwinding	3	0.884956	0.0053958	SUB1, POT1, MNAT1
GO:0060412~ventricular septum morphogenesis	5	1.47493	0.00541035	BMPR2, ZFPM2, SOX4, TGFBR2, ROBO1
GO:0051098~regulation of binding	15	4.42478	0.00545738	SP100, ROCK1, USP33, CAV1, HMGB2, TWIST1, EDF1, NIPBL, IFI16, ZNF618, SUB1, C4ORF3, EIF3E, B2M, S100A10
GO:1903729~regulation of plasma membrane organization	8	2.35988	0.00561915	ITGB1, SH3GLB1, GOPC, WASL, RAB11FIP2, GBP1, S100A10, PICALM
GO:0098840~protein transport along microtubule	6	1.76991	0.00562766	DYNC2H1, ARL3, LCA5, IFT57, DYNLL1, WDR35
GO:0099118~microtubule-based protein transport	6	1.76991	0.00562766	DYNC2H1, ARL3, LCA5, IFT57, DYNLL1, WDR35
GO:0018193~peptidyl-amino acid modification	35	10.3245	0.00615456	ENY2, CAMK2D, ROCK1, ZDHHC20, TWIST1, TWF1, PLOD2, SMC6, HDAC9, RPS6KA6, AKT3, ATP7A, PAK2, MAP3K7, SOX4, PRMT6, SRPK2, EPHA5, IL11, EPHA7, CAV1, TET2, SMARCA5, VRK1, BRAF, CDC7, CDC42BPA, TGFBR2, RAP2B, P4HA1, PHF14, FKBP7, PKN2, PPIG, PFN2
GO:0006898~receptor-mediated endocytosis	13	3.83481	0.00617384	ITGB1, MTMR2, ROCK1, CAV2, CAV1, WASL, FNBP1L, TGFBR2, ITGAV, AP3S1, B2M, SCYL2, PICALM
GO:0036293~response to decreased oxygen levels	14	4.12979	0.00618825	CAV1, VEGFC, TWIST1, PLOD2, RTN4, TGFBR2, HSP90B1, SCFD1, FUNDC1, CAT, ATP7A, PAM, BIRC2, CPEB4
GO:0034250~positive regulation of cellular amide metabolic process	10	2.94985	0.00650731	FXR1, SH3BGRL, YTHDF3, DHX36, CIRBP, GUF1, EIF3E, LARP4, SOX4, PICALM
GO:0006325~chromatin organization	27	7.9646	0.00653766	ENY2, CAMK2D, CHD9, HMGB2, TWIST1, HDAC9, RNF2, UFL1, NIPBL, GATAD1, TPR, MAP3K7, HMGN3, HMGN1, PRMT6, ATF7IP, SS18, CBX3, TET2, SMARCA5, UBE2E1, NAP1L1, VRK1, SMARCA1, BRMS1L, PHF14, ASF1A
GO:0007569~cell aging	8	2.35988	0.00661721	PRMT6, CDKN2B, AKT3, PDCD4, TWIST1, SMC6, B2M, SOD1
GO:0045333~cellular respiration	10	2.94985	0.00672221	COX7B, UQCRB, NDUFA5, UQCRQ, NDUFA12, NDUFB4, NDUFB3, CAT, NDUFA1, NDUFC1
GO:0007417~central nervous system development	31	9.14454	0.00673681	ITGB1, NCKAP1, TOP2B, COX7B, BMPR2, STXBP3, RTN4, ROBO1, RPS6KA6, NIPBL, TUBA1A, AKT3, ATP7A, B2M, CEP290, SCYL2, SOX4, DYNC2H1, EPHA5, EPHA7, CDKN2C, PCDH9, LMO4, SMARCA1, DYNLL1, PBX1, TGFBR2, UQCRQ, GNB4, MNAT1, PAM
GO:0002521~leukocyte differentiation	20	5.89971	0.00676794	ITGB1, IL11, TOP2B, ANXA1, TNFAIP6, TET2, BRAF, PTPRK, HDAC9, PBX1, TGFBR2, SOD1, IFI16, IRF1, SP3, PHF14, AZI2, ATP7A, B2M, SOX4
GO:0001568~blood vessel development	24	7.07965	0.00686435	ITGB1, DYNC2H1, SRPK2, ANXA1, BMPR2, TNFRSF12A, ROCK1, CAV1, VEGFC, TWIST1, PRCP, HDAC9, RTN4, ARHGAP24, TGFBR2, ROBO1, NELL2, RASA1, AKT3, HAS2, ITGAV, ZFPM2, ATP7A, SOX4
GO:1903241~U2-type prespliceosome assembly	4	1.17994	0.00696712	SNRPD2, SNRPG, SNRPF, HTATSF1
GO:0003181~atrioventricular valve morphogenesis	4	1.17994	0.00696712	BMPR2, TWIST1, SOX4, TGFBR2
GO:0036261~7-methylguanosine cap hypermethylation	3	0.884956	0.00711628	SNRPD2, SNRPG, SNRPF
GO:0043903~regulation of symbiosis, encompassing mutualism through parasitism	13	3.83481	0.00716141	SRPK2, TOP2B, SP100, ZDHHC20, CAV2, CAV1, SNX3, HERC5, IFI16, CHMP2B, ITGAV, PKN2, BIRC2
GO:0090066~regulation of anatomical structure size	19	5.60472	0.0071654	NCKAP1, EPHA7, BMPR2, ROCK1, CAV1, TWF1, WASL, ADD3, NTS, WDR35, RTN4, SOD1, RASA1, CFL2, AKT3, ATP7A, TMSB10, PFN2, PICALM
GO:0050789~regulation of biological process	232	68.4366	0.00725634	NCKAP1, SMC6, FNBP1L, HERC5, RPS6KA6, PEG10, AKT3, B2M, PRKACB, SOX4, RPS12, DYNC2H1, EPHA5, EPHA7, CIRBP, ACSL4, ANK3, RFX7, SUB1, HECW2, GUF1, ZNF711, ZFPM2, ASF1A, CGGBP1, PFN2, MTMR2, BEX1, STXBP3, DCUN1D5, TWIST1, TWF1, VPS26A, HTATSF1, MYL12B, SNX3, FXR1, SCFD1, RAD21, DHX36, SNX7, RAB11FIP2, MAP9, S100A10, SRPK2, SMARCA5, NR2F1, CDC7, BRAF, LARP4, SMARCA1, GNG11, PBX1, CYLD, CCDC88A, LPAR6…
GO:0009892~negative regulation of metabolic process	78	23.0088	0.00726931	BMPR2, HMGB2, PTPRK, PHF6, ROBO1, UFL1, RPS6KA6, NIPBL, ITGAV, NBN, SOX4, PRMT6, USP47, LMO4, CIRBP, ARID5B, DYNLL1, WDR35, ZHX1, PTBP3, TFDP2, SUB1, IRF1, PAX9, POT1, PFDN4, ZFPM2, BIRC2, CGGBP1, ASF1A, SP100, MTMR2, ROCK1, GPR87, CREM, TWIST1, NTS, HDAC9, RNF2, RTN4, SNX3, FXR1, SCFD1, IFI16, TPR, DHX36, IGF2BP3, PAK2, GBP1, ATF7IP, USP25, CDKN2B, CDKN2C, SSB, YTHDF3, CBX3, CAV1, SMARCA5, NR2F1…
GO:0048514~blood vessel morphogenesis	22	6.48968	0.00732934	ITGB1, SRPK2, ANXA1, BMPR2, TNFRSF12A, ROCK1, CAV1, VEGFC, TWIST1, PRCP, HDAC9, RTN4, ARHGAP24, TGFBR2, ROBO1, NELL2, RASA1, AKT3, HAS2, ITGAV, ZFPM2, SOX4
GO:0010243~response to organonitrogen compound	28	8.25959	0.00742128	LEPROT, ROCK1, STXBP3, HDAC9, HSP90B1, UFL1, TUBA1A, GNG2, SESN3, FUNDC1, AP3S1, ATP7A, B2M, PRKACB, OSBPL8, ANXA1, CAV2, CAV1, TCF12, BRAF, SOD1, MMP13, CAT, COL4A6, LAMTOR2, PHIP, BIRC2, CPEB4
GO:0061640~cytoskeleton-dependent cytokinesis	7	2.0649	0.00756707	ROCK1, RASA1, ARL3, CKAP2, ANK3, EXOC5, MAP9
GO:0010389~regulation of G2/M transition of mitotic cell cycle	7	2.0649	0.00756707	USP47, PKIA, RAD21, RAD17, CDC7, NBN, PBX1
GO:0003148~outflow tract septum morphogenesis	4	1.17994	0.00782177	BMPR2, ZFPM2, TGFBR2, ROBO1
GO:0061008~hepaticobiliary system development	9	2.65487	0.00788107	CDKN2B, NIPBL, ANXA1, SP3, ARID5B, ACADM, ATP7A, WDR35, RTN4
GO:0065008~regulation of biological quality	90	26.5487	0.00795996	ITGB1, NCKAP1, BMPR2, USP33, HMGB2, WASL, SMC6, IL1RAP, SYNE1, UFL1, TUBA1A, SESN3, CFL2, AKT3, ITGAV, NBN, ATP7A, B2M, PRKACB, TMSB10, HMGN3, SOX4, SH3GLB1, EPHA5, IL11, USP47, EPHA7, ANXA1, CIRBP, CASK, ACSL4, ANK3, DYNLL1, WDR35, PTBP3, RAP2B, STIM2, RASA1, POT1, PHIP, PFDN4, FTL, PFN2, SP100, CAMK2D, MTMR2, ENY2, STXBP3, ROCK1, ZDHHC20, RHOBTB3, TWF1, PRCP, NTS, ADD3, TRHDE, HDAC9, RTN4, HSP9…
GO:0003281~ventricular septum development	6	1.76991	0.00798083	BMPR2, LMO4, ZFPM2, SOX4, TGFBR2, ROBO1
GO:0034763~negative regulation of transmembrane transport	8	2.35988	0.00804336	CAMK2D, HECW2, CAV1, C4ORF3, TWIST1, GOPC, ANK3, ATP7A
GO:0080134~regulation of response to stress	42	12.3894	0.00805169	ITGB1, ENY2, TNFAIP6, NLRC5, HMGB2, TWIST1, RTN4, FXR1, HERC5, UFL1, SESN3, IFI16, AKT3, USP1, ATP7A, RAB11FIP2, PAK2, MAP3K7, B2M, SOX4, S100A10, USP25, USP47, ANXA1, TNFRSF12A, YTHDF3, CAV1, LANCL1, SMARCA5, CASK, BRAF, PJA2, TGFBR2, SOD1, DNAJA1, ETAA1, CYLD, IRF1, GNAQ, PDCD4, POT1, BIRC2
GO:0045727~positive regulation of translation	9	2.65487	0.00815085	FXR1, SH3BGRL, YTHDF3, DHX36, CIRBP, GUF1, EIF3E, LARP4, SOX4
GO:0051716~cellular response to stimulus	152	44.8378	0.008297	NCKAP1, UBXN2A, SMC6, IL1RAP, FNBP1L, RPS6KA6, SESN3, PEG10, AKT3, NBN, IL13RA2, AZI2, B2M, PRKACB, MAP3K7, SOX4, RPS12, HMGN1, DYNC2H1, SH3GLB1, EPHA5, EPHA7, CASK, ARID5B, VRK1, ANK3, ACAP2, SUB1, COL4A6, PHIP, ASF1A, ENY2, MTMR2, BEX1, DCUN1D5, STXBP3, GPR87, DDX1, ARL3, RHOBTB3, CREM, TWIST1, NTS, TRHDE, RTN4, HSP90B1, SNX3, FXR1, RAD21, TPR, DHX36, LPXN, RAB11FIP2, ZC3H15, SRPK2, OSBPL8, CBX…
GO:0006281~DNA repair	19	5.60472	0.00837645	PRMT6, USP47, DDX1, HMGB2, SMARCA5, TWIST1, CDC7, SMC6, ETAA1, UFL1, NIPBL, RAD21, USP1, POT1, RAD17, NBN, MNAT1, ASF1A, HMGN1
GO:0015985~energy coupled proton transport, down electrochemical gradient	6	1.76991	0.00843037	NDUFA5, NDUFA12, NDUFB4, NDUFB3, NDUFA1, NDUFC1
GO:0015986~ATP synthesis coupled proton transport	6	1.76991	0.00843037	NDUFA5, NDUFA12, NDUFB4, NDUFB3, NDUFA1, NDUFC1
GO:0060627~regulation of vesicle-mediated transport	19	5.60472	0.00857206	MTMR2, ANXA1, ROCK1, STXBP3, CAV1, CASK, BRAF, WASL, SOD1, SNX3, SCFD1, GOPC, ITGAV, IL13RA2, B2M, SCYL2, PFN2, S100A10, PICALM
GO:0007264~small GTPase mediated signal transduction	16	4.71976	0.00876704	ITGB1, NCKAP1, ARHGEF12, ROCK1, ARL3, RHOBTB3, RTN4, ARHGAP24, ROBO1, CCDC88A, RAP2B, LPAR6, RASA1, SHOC2, ITGAV, CHML
GO:0044770~cell cycle phase transition	18	5.30973	0.00887948	ITGB1, USP47, CDKN2B, CDKN2C, ANXA1, FBXL17, CDC7, PBX1, DBF4, PKIA, HECW2, RAD21, TPR, RAD17, NBN, SPDL1, MNAT1, SOX4
GO:0033108~mitochondrial respiratory chain complex assembly	7	2.0649	0.00903862	NDUFA5, NDUFA12, NDUFB4, NDUFB3, NDUFA1, NDUFAF2, NDUFC1
GO:0031952~regulation of protein autophosphorylation	5	1.47493	0.00922972	EPHA7, RAP2B, CAV1, VEGFC, NBN
GO:0071495~cellular response to endogenous stimulus	36	10.6195	0.00962303	ITGB1, LEPROT, BMPR2, TNFAIP6, PTPRK, HDAC9, HSP90B1, UFL1, GNG2, SESN3, PEG10, HAS2, LPXN, SHOC2, AP3S1, ATP7A, PAK2, MAP3K7, B2M, OSBPL8, CDKN2B, ANXA1, CBX3, CAV2, CAV1, BRAF, TGFBR2, SOD1, DNAJA1, ACAP2, BRMS1L, COL4A6, PDCD4, LAMTOR2, PHIP, CPEB4
GO:0006818~hydrogen transport	10	2.94985	0.00962675	COX7B, NDUFA5, UQCRQ, NDUFA12, NDUFB4, NDUFB3, NDUFA1, TWIST1, NDUFC1, ATP7A
GO:0015992~proton transport	10	2.94985	0.00962675	COX7B, NDUFA5, UQCRQ, NDUFA12, NDUFB4, NDUFB3, NDUFA1, TWIST1, NDUFC1, ATP7A
GO:0000086~G2/M transition of mitotic cell cycle	8	2.35988	0.00968427	USP47, CDKN2B, RAD21, FBXL17, RAD17, CDC7, NBN, PBX1
GO:0003171~atrioventricular valve development	4	1.17994	0.00970923	BMPR2, TWIST1, SOX4, TGFBR2
GO:0051607~defense response to virus	12	3.53982	0.00971532	HERC5, IFI16, DDX1, IRF1, DHX36, NLRC5, AZI2, GBP1, TANK, IFI44L, BIRC2, GBP3
GO:0040012~regulation of locomotion	32	9.43953	0.00992765	ITGB1, SP100, BMPR2, ROCK1, TNFAIP6, TWIST1, PRCP, WASL, PTPRK, HDAC9, RTN4, ROBO1, NIPBL, AKT3, HAS2, ITGAV, ATP7A, TMSB10, OSBPL8, ANXA1, YTHDF3, CAV2, LMO4, CAV1, VEGFC, BRAF, TGFBR2, RAP2B, BRMS1L, CHMP2B, PKN2, PFN2
GO:0051090~regulation of sequence-specific DNA binding transcription factor activity	16	4.71976	0.00994896	EPHA5, SP100, BEX1, CAV1, NLRC5, TWIST1, ARID5B, IL1RAP, NTS, RNF2, PBX1, CYLD, UFL1, CAT, TAX1BP1, MAP3K7
GO:0015980~energy derivation by oxidation of organic compounds	12	3.53982	0.0101964	COX7B, UQCRB, NDUFA5, UQCRQ, NDUFA12, NDUFB4, GBE1, NDUFB3, CAT, NDUFA1, NDUFC1, ACADM
GO:0003151~outflow tract morphogenesis	6	1.76991	0.010404	NIPBL, BMPR2, TWIST1, ZFPM2, TGFBR2, ROBO1
GO:0031023~microtubule organizing center organization	8	2.35988	0.0104047	PPP1R12A, TUBA1A, USP33, CHMP2B, MPDZ, MAP9, SDCCAG8, CNTLN
GO:0030334~regulation of cell migration	29	8.55457	0.0104387	ITGB1, SP100, BMPR2, ROCK1, TNFAIP6, TWIST1, PRCP, WASL, PTPRK, HDAC9, RTN4, ROBO1, NIPBL, AKT3, HAS2, ITGAV, ATP7A, TMSB10, OSBPL8, ANXA1, YTHDF3, LMO4, CAV1, VEGFC, BRAF, TGFBR2, RAP2B, BRMS1L, PFN2
GO:0022900~electron transport chain	9	2.65487	0.0105392	COX7B, UQCRB, NDUFA5, UQCRQ, NDUFA12, NDUFB4, NDUFB3, NDUFA1, NDUFC1
GO:1903747~regulation of establishment of protein localization to mitochondrion	5	1.47493	0.0105759	DNAJA1, SH3GLB1, UBL5, LEPROT, TOMM7
GO:0006120~mitochondrial electron transport, NADH to ubiquinone	5	1.47493	0.0105759	NDUFA5, NDUFB4, NDUFB3, NDUFA1, NDUFC1
GO:0033365~protein localization to organelle	27	7.9646	0.0106853	LEPROT, BMPR2, ARL3, DDX1, RTN4, SYNE1, UBL5, NIPBL, RAD21, TPR, EMC2, SPDL1, TNPO1, GBP1, CNTLN, SH3GLB1, DYNC2H1, OSBPL8, TMEM30A, SSB, WDR35, DNAJA1, CCDC88A, NEDD1, PKIA, TOMM7, POT1
GO:0001666~response to hypoxia	13	3.83481	0.0107348	CAV1, VEGFC, TWIST1, PLOD2, RTN4, TGFBR2, HSP90B1, SCFD1, FUNDC1, CAT, ATP7A, PAM, BIRC2
GO:0071345~cellular response to cytokine stimulus	25	7.37463	0.0107519	SP100, STXBP3, UBXN2A, NLRC5, IL1RAP, TANK, ROBO1, IFI16, TPR, HAS2, IL13RA2, AZI2, GBP1, MAP3K7, ZC3H15, GBP3, YTHDF3, CAV1, SMARCA5, VEGFC, ARID5B, WDR35, CYLD, IRF1, BIRC2
GO:0000910~cytokinesis	8	2.35988	0.0107791	ROCK1, RASA1, ARL3, CKAP2, PKN2, ANK3, EXOC5, MAP9
GO:0090316~positive regulation of intracellular protein transport	9	2.65487	0.0107882	SH3GLB1, UBL5, LEPROT, BMPR2, TMEM30A, TPR, TOMM7, ANK3, CEP290
GO:0045089~positive regulation of innate immune response	12	3.53982	0.0109538	CYLD, IFI16, CAV1, IRF1, NLRC5, HMGB2, RAB11FIP2, MAP3K7, PAK2, RTN4, BIRC2, PJA2
GO:0016197~endosomal transport	13	3.83481	0.0109911	MTMR2, LEPROT, VTA1, RHOBTB3, VPS26A, SNX3, ACAP2, SNX2, CHMP2B, SNX7, ANKRD50, SCYL2, PICALM
GO:0043623~cellular protein complex assembly	22	6.48968	0.0110176	NCKAP1, NDUFA5, NDUFA12, NDUFB4, ARL3, NDUFB3, NDUFA1, TWF1, NDUFC1, WASL, TBCA, ADD3, RTN4, CAMSAP2, NEDD1, TUBA1A, RASA1, NDUFAF2, TMSB10, B2M, PFN2, PICALM
GO:0022618~ribonucleoprotein complex assembly	12	3.53982	0.0111894	SRPK2, YTHDF3, SNRPD2, SCAF11, YTHDC1, DDX1, CIRBP, SNRPG, PSIP1, EIF3E, SNRPF, HTATSF1
GO:0003183~mitral valve morphogenesis	3	0.884956	0.0111903	BMPR2, TWIST1, SOX4
GO:0050896~response to stimulus	180	53.0973	0.0114557	NCKAP1, NDUFA12, UBXN2A, PLOD2, SMC6, IL1RAP, FNBP1L, IFI44L, HERC5, RPS6KA6, SESN3, PEG10, AKT3, NBN, HMCN1, IL13RA2, AZI2, B2M, HMGN3, PRKACB, MAP3K7, SOX4, RPS12, HMGN1, DYNC2H1, SH3GLB1, EPHA5, EPHA7, LMO4, CIRBP, CASK, ARID5B, VRK1, ACSL4, ANK3, ACAP2, SUB1, COL4A6, PHIP, ASF1A, ENY2, MTMR2, BEX1, DCUN1D5, STXBP3, GPR87, DDX1, ARL3, RHOBTB3, CREM, TWIST1, TWF1, NTS, TRHDE, RTN4, HSP90B1, SNX…
GO:1902749~regulation of cell cycle G2/M phase transition	7	2.0649	0.0116139	USP47, PKIA, RAD21, RAD17, CDC7, NBN, PBX1
GO:0044802~single-organism membrane organization	25	7.37463	0.0118135	ITGB1, ROCK1, UBXN2A, WASL, FNBP1L, RTN4, EMC2, RAB11FIP2, GBP1, S100A10, SH3GLB1, OSBPL8, TMEM30A, ANXA1, CAV2, CAV1, VRK1, ANK3, SOD1, CCDC88A, CHMP2B, TOMM7, GOPC, EXOC5, PICALM
GO:0043271~negative regulation of ion transport	9	2.65487	0.0118822	CAMK2D, HECW2, CAV1, C4ORF3, TWIST1, GOPC, ACSL4, ANK3, ATP7A
GO:0006446~regulation of translational initiation	6	1.76991	0.0120768	EIF5B, SH3BGRL, YTHDF3, DDX1, TPR, EIF3E
GO:2000145~regulation of cell motility	30	8.84956	0.0122451	ITGB1, SP100, BMPR2, ROCK1, TNFAIP6, TWIST1, PRCP, WASL, PTPRK, HDAC9, RTN4, ROBO1, NIPBL, AKT3, HAS2, ITGAV, ATP7A, TMSB10, OSBPL8, ANXA1, YTHDF3, LMO4, CAV1, VEGFC, BRAF, TGFBR2, RAP2B, BRMS1L, PKN2, PFN2
GO:0070482~response to oxygen levels	14	4.12979	0.0124423	CAV1, VEGFC, TWIST1, PLOD2, RTN4, TGFBR2, HSP90B1, SCFD1, FUNDC1, CAT, ATP7A, PAM, BIRC2, CPEB4
GO:0035556~intracellular signal transduction	62	18.2891	0.012554	ITGB1, NCKAP1, ROBO1, UFL1, RPS6KA6, SESN3, AKT3, ITGAV, NBN, AZI2, PRKACB, MAP3K7, SOX4, PRMT6, EPHA5, IL11, SS18, USP47, EPHA7, ARHGEF12, PJA2, RAP2B, RASA1, CAT, BIRC2, SP100, CAMK2D, LEPROT, ROCK1, ARL3, DDX1, RHOBTB3, NLRC5, TWIST1, NTS, TANK, UACA, RTN4, IFI16, DHX36, SHOC2, CHML, PAK2, GBP1, SRPK2, OSBPL8, CAV2, CAV1, BRAF, CDC42BPA, ARHGAP24, SOD1, DNAJA1, CYLD, CCDC88A, LPAR6, REL, PDCD4…
GO:0043433~negative regulation of sequence-specific DNA binding transcription factor activity	9	2.65487	0.0126471	UFL1, CYLD, SP100, CAT, TAX1BP1, NLRC5, TWIST1, RNF2, PBX1
GO:1903034~regulation of response to wounding	10	2.94985	0.0126855	ITGB1, ANXA1, TNFRSF12A, GNAQ, CAV1, CASK, BRAF, ATP7A, TGFBR2, S100A10
GO:0007420~brain development	24	7.07965	0.0129326	ITGB1, DYNC2H1, EPHA5, TOP2B, EPHA7, BMPR2, PCDH9, STXBP3, SMARCA1, DYNLL1, RTN4, PBX1, TGFBR2, ROBO1, NIPBL, TUBA1A, UQCRQ, AKT3, GNB4, MNAT1, ATP7A, B2M, CEP290, SCYL2
GO:0051222~positive regulation of protein transport	13	3.83481	0.0130295	SH3GLB1, LEPROT, TMEM30A, BMPR2, VEGFC, ACSL4, ANK3, DYNLL1, UBL5, TPR, TOMM7, CEP290, SOX4
GO:0050793~regulation of developmental process	64	18.8791	0.0133477	ITGB1, BMPR2, TNFAIP6, HMGB2, IL1RAP, ROBO1, UFL1, RPS6KA6, NIPBL, AKT3, ITGAV, B2M, PRKACB, SOX4, HMGN1, PRMT6, SS18, EPHA7, ANXA1, LMO4, TCF12, PTBP3, TGFBR2, RASA1, HECW2, IRF1, PAX9, PHIP, ZFPM2, BIRC2, SP100, MTMR2, ROCK1, RHOBTB3, TWIST1, TWF1, HDAC9, RTN4, CAMSAP2, MYL12B, SNX3, PALMD, DHX36, HAS2, ZC3H13, PAK2, GBP1, S100A10, CDKN2B, TMEM30A, YTHDF3, CAV1, NR2F1, VEGFC, BRAF, NAP1L1, LARP…
GO:0043086~negative regulation of catalytic activity	24	7.07965	0.0134614	PRMT6, USP47, CDKN2B, CDKN2C, ANXA1, PPP1R12A, ROCK1, GPR87, CAV1, DYNLL1, HDAC9, DNAJA1, IFI16, PKIA, GNAQ, C4ORF3, PDCD4, PHACTR2, POT1, RPS20, MNAT1, PAK2, BIRC2, PICALM
GO:0001765~membrane raft assembly	3	0.884956	0.0135292	CAV2, CAV1, S100A10
GO:0003174~mitral valve development	3	0.884956	0.0135292	BMPR2, TWIST1, SOX4
GO:0010605~negative regulation of macromolecule metabolic process	72	21.2389	0.0136948	BMPR2, HMGB2, PTPRK, PHF6, ROBO1, UFL1, RPS6KA6, NIPBL, ITGAV, NBN, SOX4, PRMT6, USP47, LMO4, CIRBP, ARID5B, WDR35, ZHX1, PTBP3, TFDP2, SUB1, IRF1, PAX9, POT1, PFDN4, ZFPM2, BIRC2, CGGBP1, ASF1A, SP100, MTMR2, ROCK1, CREM, TWIST1, NTS, HDAC9, RNF2, RTN4, SNX3, FXR1, IFI16, TPR, DHX36, IGF2BP3, PAK2, GBP1, ATF7IP, USP25, CDKN2B, CDKN2C, SSB, YTHDF3, CBX3, CAV1, SMARCA5, NR2F1, PNRC2, DNAJA1, CYLD,…
GO:0003007~heart morphogenesis	11	3.24484	0.0138666	NIPBL, BMPR2, PDCD4, TWIST1, HAS2, ZFPM2, IFT57, SOX4, RTN4, TGFBR2, ROBO1
GO:0001932~regulation of protein phosphorylation	38	11.2094	0.0138946	BMPR2, ROCK1, TWIST1, TWF1, ROBO1, FXR1, HERC5, RPS6KA6, NBN, PAK2, GBP1, MAP3K7, OSBPL8, IL11, CDKN2B, EPHA7, CDKN2C, CAV2, CAV1, VEGFC, BRAF, PJA2, TGFBR2, SOD1, DNAJA1, ETAA1, CYLD, CCDC88A, RAP2B, DBF4, PKIA, GNAQ, PDCD4, TAB2, LAMTOR2, PHIP, MNAT1, PFN2
GO:0050673~epithelial cell proliferation	16	4.71976	0.0140095	CDKN2B, BMPR2, CAV2, CAV1, HMGB2, VEGFC, TWIST1, CASK, PTPRK, RTN4, ROBO1, AKT3, HAS2, IFT57, ATP7A, B2M
GO:0048732~gland development	16	4.71976	0.0142617	CDKN2B, ANXA1, LMO4, CAV1, ARID5B, BRAF, WDR35, RTN4, PBX1, TGFBR2, ROBO1, SOD1, SP3, ACADM, ATP7A, PAM
GO:0007088~regulation of mitotic nuclear division	10	2.94985	0.0145021	NIPBL, CAV2, HECW2, RAD21, TPR, CHMP2B, SMARCA5, PHIP, SPDL1, MAP9
GO:0002218~activation of innate immune response	10	2.94985	0.0145021	CYLD, IFI16, CAV1, IRF1, RAB11FIP2, MAP3K7, PAK2, RTN4, BIRC2, PJA2
GO:0034766~negative regulation of ion transmembrane transport	7	2.0649	0.014668	CAMK2D, HECW2, CAV1, C4ORF3, GOPC, ANK3, ATP7A
GO:0009314~response to radiation	16	4.71976	0.0150001	ITGB1, USP47, ANXA1, CIRBP, FBXL17, BRAF, PTPRK, TANK, NIPBL, TUBA1A, IFI16, GNAQ, DHX36, CAT, USP1, HMGN1
GO:1903955~positive regulation of protein targeting to mitochondrion	4	1.17994	0.0154997	SH3GLB1, UBL5, LEPROT, TOMM7
GO:0006914~autophagy	17	5.01475	0.0158829	SH3GLB1, ROCK1, UBXN2A, VTA1, VPS26A, FNBP1L, UFL1, SCFD1, SESN3, IFI16, FUNDC1, CHMP2B, TOMM7, TAB2, WDFY3, SNX7, MAP3K7
GO:0051234~establishment of localization	101	29.7935	0.0159052	NDUFA12, FNBP1L, PEG10, IL13RA2, B2M, HMGN3, SLC35A5, SOX4, DYNC2H1, SH3GLB1, EPHA5, CASK, ACSL4, ANK3, ACAP2, STIM2, HECW2, PFN2, FTL, ENY2, MTMR2, STXBP3, YTHDC1, ARL3, RHOBTB3, TWIST1, VPS26A, HSP90B1, SNX3, SCFD1, SNX2, TPR, RAB11FIP2, SNX7, S100A10, OSBPL8, CAV2, VTA1, CAV1, BRAF, CCDC88A, APPBP2, UQCRQ, PKIA, CHMP2B, NDUFAF2, PAM, PICALM, ITGB1, COX7B, BMPR2, USP33, WASL, UBL5, NIPBL, TUBA1…
GO:0022406~membrane docking	6	1.76991	0.0159512	SNX3, ROCK1, STXBP3, CAV2, EXOC5, CEP290
GO:0021860~pyramidal neuron development	3	0.884956	0.0160597	UQCRQ, ATP7A, SCYL2
GO:0045934~negative regulation of nucleobase-containing compound metabolic process	40	11.7994	0.0162133	SP100, BMPR2, GPR87, HMGB2, CREM, TWIST1, PTPRK, HDAC9, PHF6, RNF2, NIPBL, IFI16, TPR, NBN, PRMT6, ATF7IP, USP47, CBX3, LMO4, CAV1, SMARCA5, NR2F1, ARID5B, ZHX1, PTBP3, TFDP2, PKIA, IRF1, BRMS1L, SUB1, SP3, PAX9, HNRNPA2B1, PHF14, PDCD4, POT1, RAD17, ZFPM2, CGGBP1, ASF1A
GO:0032410~negative regulation of transporter activity	7	2.0649	0.016387	CAMK2D, HECW2, CAV1, C4ORF3, TWIST1, GOPC, ANK3
GO:0016236~macroautophagy	11	3.24484	0.0169297	SH3GLB1, UFL1, SCFD1, SESN3, UBXN2A, VTA1, CHMP2B, TOMM7, WDFY3, SNX7, MAP3K7
GO:2001236~regulation of extrinsic apoptotic signaling pathway	8	2.35988	0.0171009	CYLD, SP100, TNFRSF12A, CAV1, HMGB2, ITGAV, PHIP, PAK2
GO:0030036~actin cytoskeleton organization	21	6.19469	0.0175992	ITGB1, NCKAP1, ANXA1, ROCK1, RHOBTB3, TWF1, BRAF, WASL, ADD3, CDC42BPA, HSP90B1, ENAH, CCDC88A, RASA1, CFL2, PHACTR2, HMCN1, PAK2, TMSB10, PFN2, S100A10
GO:0031032~actomyosin structure organization	9	2.65487	0.0176779	ITGB1, CCDC88A, ROCK1, CFL2, BRAF, CDC42BPA, PAK2, PFN2, S100A10
GO:0071711~basement membrane organization	4	1.17994	0.0182549	ITGB1, CAV2, CAV1, HMCN1
GO:0045859~regulation of protein kinase activity	22	6.48968	0.0184286	OSBPL8, CDKN2B, CDKN2C, BMPR2, CAV1, VEGFC, TGFBR2, ROBO1, SOD1, DNAJA1, HERC5, ETAA1, CCDC88A, DBF4, RAP2B, PKIA, GNAQ, PDCD4, TAB2, MNAT1, MAP3K7, PAK2
GO:0042769~DNA damage response, detection of DNA damage	3	0.884956	0.018775	DNAJA1, USP1, SOX4
GO:0016192~vesicle-mediated transport	39	11.5044	0.0188181	ITGB1, MTMR2, ROCK1, STXBP3, ARL3, USP33, RHOBTB3, VPS26A, WASL, FNBP1L, SNX3, SCFD1, SNX2, ITGAV, AP3S1, CHML, IL13RA2, SNX7, RAB11FIP2, ANKRD50, B2M, SCYL2, S100A10, ANXA1, CAV2, VTA1, CAV1, CASK, BRAF, ANK3, TGFBR2, SOD1, ACAP2, CHMP2B, GOPC, EXOC5, ERGIC2, PFN2, PICALM
GO:0032268~regulation of cellular protein metabolic process	71	20.944	0.0188433	BMPR2, UBXN2A, ROBO1, HERC5, UFL1, RPS6KA6, NIPBL, NBN, IFT57, MAP3K7, SOX4, PRMT6, IL11, EIF5B, USP47, EPHA7, PPP1R12A, CIRBP, WDR35, PJA2, TGFBR2, RAP2B, DBF4, GUF1, PHIP, BIRC2, PFN2, CAMK2D, DCUN1D5, ROCK1, DDX1, TWIST1, TWF1, TANK, UACA, HSP90B1, FXR1, SH3BGRL, IFI16, TPR, DHX36, IGF2BP3, PAK2, GBP1, S100A10, OSBPL8, CDKN2B, CDKN2C, YTHDF3, CAV2, CAV1, SMARCA5, VEGFC, BRAF, LARP4, SOD1, DNAJ…
GO:0097581~lamellipodium organization	6	1.76991	0.018948	ITGB1, NCKAP1, CCDC88A, SNX2, TWF1, ATP7A
GO:0071826~ribonucleoprotein complex subunit organization	12	3.53982	0.0189709	SRPK2, YTHDF3, SNRPD2, SCAF11, YTHDC1, DDX1, CIRBP, SNRPG, PSIP1, EIF3E, SNRPF, HTATSF1
GO:0051270~regulation of cellular component movement	31	9.14454	0.0190512	ITGB1, SP100, CAMK2D, BMPR2, ROCK1, TNFAIP6, TWIST1, PRCP, WASL, PTPRK, HDAC9, RTN4, ROBO1, NIPBL, AKT3, HAS2, ITGAV, ATP7A, TMSB10, OSBPL8, ANXA1, YTHDF3, LMO4, CAV1, VEGFC, BRAF, TGFBR2, RAP2B, BRMS1L, PKN2, PFN2
GO:0045087~innate immune response	27	7.9646	0.0192082	SP100, STXBP3, DDX1, NLRC5, HMGB2, IL1RAP, TANK, RTN4, HERC5, IFI16, DHX36, AZI2, RAB11FIP2, PAK2, GBP1, MAP3K7, B2M, GBP3, SRPK2, ANXA1, YTHDF3, CAV1, PJA2, CYLD, IRF1, REL, BIRC2
GO:1904951~positive regulation of establishment of protein localization	13	3.83481	0.0193425	SH3GLB1, LEPROT, TMEM30A, BMPR2, VEGFC, ACSL4, ANK3, DYNLL1, UBL5, TPR, TOMM7, CEP290, SOX4
GO:0044089~positive regulation of cellular component biogenesis	19	5.60472	0.0193668	SH3GLB1, NCKAP1, ROCK1, ARL3, CAV1, TWIST1, BRAF, IL1RAP, WASL, DYNLL1, FNBP1L, CCDC88A, SUB1, TPR, DHX36, SNX7, ATP7A, PFN2, S100A10
GO:1902578~single-organism localization	69	20.354	0.0194924	ITGB1, COX7B, BMPR2, NDUFA12, WASL, FNBP1L, SYNE1, TUBA1A, ITGAV, AP3S1, TNPO1, IL13RA2, ATP7A, IFT57, TMSB10, HMGN3, SLC35A5, SCYL2, SOX4, DYNC2H1, EPHA5, IL11, ANXA1, CASK, ACSL4, NDUFC1, ANK3, DYNLL1, WDR35, EXOC5, FTL, PFN2, DYNC1I2, CAMK2D, MTMR2, ENY2, STXBP3, ROCK1, ARL3, NDUFB4, NDUFB3, TWIST1, TWF1, SNX3, TPR, HAS2, RAB11FIP2, GBP1, S100A10, OSBPL8, TMEM30A, SSB, NDUFA5, VTA1, CAV1, LCA5…
GO:1902115~regulation of organelle assembly	9	2.65487	0.0197296	SH3GLB1, CYLD, CCDC88A, SCFD1, TPR, CHMP2B, SNX7, DYNLL1, SDCCAG8
GO:0016575~histone deacetylation	6	1.76991	0.0197512	PRMT6, CAMK2D, NIPBL, BRMS1L, SMARCA5, HDAC9
GO:0071702~organic substance transport	59	17.4041	0.0198073	ITGB1, BMPR2, UBL5, TUBA1A, PEG10, ITGAV, AP3S1, TNPO1, IFT57, CEP290, HMGN3, SLC35A5, SOX4, SH3GLB1, DYNC2H1, EPHA5, ANXA1, ACSL4, ANK3, DYNLL1, WDR35, TGFBR2, EXOC5, SP100, LEPROT, ENY2, STXBP3, ZDHHC20, YTHDC1, ARL3, VPS26A, HSP90B1, SNX3, SCFD1, SNX2, TPR, IGF2BP3, CHML, SNX7, RAB11FIP2, ANKRD50, OSBPL8, TMEM30A, SSB, VTA1, CAV1, LCA5, VEGFC, BRAF, KTN1, DNAJA1, APPBP2, PKIA, HNRNPA2B1, CHMP2…
GO:0021879~forebrain neuron differentiation	5	1.47493	0.0202276	UQCRQ, ATP7A, B2M, SCYL2, ROBO1
GO:0045595~regulation of cell differentiation	46	13.5693	0.0202394	ITGB1, BMPR2, ROCK1, TNFAIP6, HMGB2, TWIST1, TWF1, HDAC9, RTN4, ROBO1, CAMSAP2, SNX3, UFL1, NIPBL, DHX36, HAS2, ITGAV, PAK2, GBP1, B2M, SOX4, S100A10, PRMT6, SS18, CDKN2B, EPHA7, TMEM30A, ANXA1, LMO4, CAV1, TCF12, NR2F1, VEGFC, NAP1L1, BRAF, PBX1, PTBP3, TGFBR2, SOD1, CCDC88A, IRF1, HECW2, PDCD4, TCF4, ZFPM2, BIRC2
GO:0006810~transport	97	28.6136	0.0202814	NDUFA12, FNBP1L, PEG10, IL13RA2, B2M, HMGN3, SLC35A5, SOX4, DYNC2H1, SH3GLB1, EPHA5, CASK, ACSL4, ANK3, ACAP2, STIM2, HECW2, PFN2, FTL, ENY2, MTMR2, STXBP3, YTHDC1, ARL3, RHOBTB3, TWIST1, VPS26A, HSP90B1, SNX3, SCFD1, SNX2, TPR, RAB11FIP2, SNX7, S100A10, OSBPL8, CAV2, VTA1, CAV1, BRAF, CCDC88A, APPBP2, UQCRQ, PKIA, CHMP2B, NDUFAF2, PAM, PICALM, ITGB1, COX7B, BMPR2, USP33, WASL, UBL5, TUBA1A, RSRC…
GO:0042592~homeostatic process	46	13.5693	0.0203212	SP100, ENY2, CAMK2D, STXBP3, HMGB2, PRCP, SMC6, HDAC9, RTN4, HSP90B1, UFL1, TUBA1A, SESN3, CFL2, DHX36, AKT3, HAS2, ITGAV, NBN, ATP7A, RAB11FIP2, HMGN3, B2M, PRKACB, SOX4, EPHA5, ANXA1, CAV2, CAV1, LCA5, ANK3, DYNLL1, WDR35, PTBP3, SOD1, NELL2, STIM2, LPAR6, SP3, HNRNPA2B1, CHMP2B, NDUFAF2, POT1, RPS24, FTL, PICALM
GO:0051050~positive regulation of transport	26	7.66962	0.0206966	ITGB1, MTMR2, LEPROT, BMPR2, WASL, UBL5, TPR, B2M, CEP290, SCYL2, SOX4, S100A10, SH3GLB1, OSBPL8, TMEM30A, ANXA1, CAV1, VEGFC, CASK, ACSL4, BRAF, ANK3, DYNLL1, SOD1, STIM2, TOMM7
GO:0002758~innate immune response-activating signal transduction	9	2.65487	0.0208192	CYLD, CAV1, IRF1, RAB11FIP2, MAP3K7, PAK2, RTN4, BIRC2, PJA2
GO:0070925~organelle assembly	25	7.37463	0.0211846	ITGB1, UBXN2A, ARL3, FNBP1L, SCFD1, CFL2, TPR, AP3S1, IFT57, SNX7, CEP290, MAP9, SH3GLB1, DYNC2H1, YTHDF3, VTA1, CIRBP, DYNLL1, WDR35, CYLD, CCDC88A, KIAA0586, CHMP2B, EXOC5, SDCCAG8
GO:0007169~transmembrane receptor protein tyrosine kinase signaling pathway	19	5.60472	0.0212119	EPHA5, OSBPL8, SS18, LEPROT, EPHA7, CAV2, VEGFC, ARID5B, BRAF, RTN4, ROBO1, CCDC88A, RASA1, COL4A6, PHF14, SHOC2, PHIP, AP3S1, PAK2
GO:1903749~positive regulation of establishment of protein localization to mitochondrion	4	1.17994	0.0212643	SH3GLB1, UBL5, LEPROT, TOMM7
GO:2000009~negative regulation of protein localization to cell surface	3	0.884956	0.0216683	LEPROT, GOPC, PICALM
GO:0035721~intraciliary retrograde transport	3	0.884956	0.0216683	DYNC2H1, DYNLL1, WDR35
GO:1902531~regulation of intracellular signal transduction	45	13.2743	0.0217122	ITGB1, LEPROT, CAMK2D, ROCK1, DDX1, TWIST1, NTS, TANK, UACA, RTN4, ROBO1, UFL1, RPS6KA6, SESN3, DHX36, AKT3, SHOC2, ITGAV, PAK2, GBP1, MAP3K7, SOX4, PRMT6, OSBPL8, IL11, USP47, EPHA7, ARHGEF12, CAV2, CAV1, BRAF, PJA2, ARHGAP24, SOD1, DNAJA1, CYLD, LPAR6, RASA1, CAT, REL, PDCD4, TAB2, RPS20, LAMTOR2, BIRC2
GO:0071559~response to transforming growth factor beta	11	3.24484	0.0222416	CDKN2B, ROCK1, CAV2, PEG10, BRMS1L, CAV1, LPXN, PTPRK, MAP3K7, PAK2, TGFBR2
GO:0001889~liver development	8	2.35988	0.022343	CDKN2B, ANXA1, SP3, ARID5B, ACADM, ATP7A, WDR35, RTN4
GO:0072657~protein localization to membrane	18	5.30973	0.0223721	ITGB1, SH3GLB1, ROCK1, TNFAIP6, ZDHHC20, ARL3, CAV1, BRAF, ANK3, CCDC88A, EMC2, TOMM7, GOPC, EXOC5, RAB11FIP2, GBP1, S100A10, PICALM
GO:0003176~aortic valve development	4	1.17994	0.0228646	BMPR2, ROCK1, TWIST1, ROBO1
GO:0009967~positive regulation of signal transduction	40	11.7994	0.0231048	ITGB1, BMPR2, ROCK1, DDX1, NLRC5, NTS, RTN4, ROBO1, DHX36, AKT3, SHOC2, ITGAV, PAK2, MAP3K7, SOX4, RPS12, DYNC2H1, OSBPL8, IL11, USP47, CDKN2B, TNFRSF12A, CAV2, CAV1, BRAF, WDR35, PJA2, TGFBR2, SOD1, CYLD, CCDC88A, LPAR6, CAT, REL, PDCD4, TAB2, RPS20, LAMTOR2, PHIP, BIRC2
GO:0048259~regulation of receptor-mediated endocytosis	7	2.0649	0.0231113	MTMR2, ROCK1, ITGAV, WASL, B2M, SCYL2, PICALM
GO:0048858~cell projection morphogenesis	19	5.60472	0.0231667	ITGB1, EPHA5, NCKAP1, TOP2B, EPHA7, BMPR2, LMO4, USP33, BRAF, ANK3, WASL, RTN4, ROBO1, NELL2, ENAH, SNX2, DHX36, ATP7A, PICALM
GO:0019058~viral life cycle	14	4.12979	0.0233115	ITGB1, SRPK2, TOP2B, SP100, SSB, CAV2, VTA1, CAV1, HTATSF1, SNX3, IFI16, CHMP2B, ITGAV, PKN2
GO:1904950~negative regulation of establishment of protein localization	8	2.35988	0.0236387	SNX3, DNAJA1, SP100, ENY2, ANXA1, PKIA, NDUFAF2, GOPC
GO:0045664~regulation of neuron differentiation	20	5.89971	0.0236578	ITGB1, EPHA7, TMEM30A, BMPR2, ROCK1, TCF12, NR2F1, TWF1, BRAF, RTN4, PBX1, CAMSAP2, ROBO1, SNX3, CCDC88A, HECW2, DHX36, TCF4, PAK2, B2M
GO:0051297~centrosome organization	7	2.0649	0.0238719	PPP1R12A, TUBA1A, USP33, CHMP2B, MAP9, SDCCAG8, CNTLN
GO:0070271~protein complex biogenesis	31	9.14454	0.0240016	NCKAP1, NDUFA12, ARL3, NDUFB4, NDUFB3, TWIST1, TWF1, WASL, ADD3, RTN4, CAMSAP2, TUBA1A, PEG10, DHX36, TMSB10, B2M, SH3GLB1, ATF7IP, NDUFA5, LMO4, NDUFA1, NDUFC1, TBCA, KCTD3, NEDD1, RASA1, SUB1, NDUFAF2, BIRC2, PFN2, PICALM
GO:0006461~protein complex assembly	31	9.14454	0.0240016	NCKAP1, NDUFA12, ARL3, NDUFB4, NDUFB3, TWIST1, TWF1, WASL, ADD3, RTN4, CAMSAP2, TUBA1A, PEG10, DHX36, TMSB10, B2M, SH3GLB1, ATF7IP, NDUFA5, LMO4, NDUFA1, NDUFC1, TBCA, KCTD3, NEDD1, RASA1, SUB1, NDUFAF2, BIRC2, PFN2, PICALM
GO:0032413~negative regulation of ion transmembrane transporter activity	6	1.76991	0.024101	CAMK2D, HECW2, CAV1, C4ORF3, GOPC, ANK3
GO:0051492~regulation of stress fiber assembly	6	1.76991	0.024101	CCDC88A, ROCK1, BRAF, PAK2, PFN2, S100A10
GO:0045088~regulation of innate immune response	13	3.83481	0.0241266	YTHDF3, CAV1, NLRC5, HMGB2, PJA2, RTN4, CYLD, IFI16, IRF1, RAB11FIP2, MAP3K7, PAK2, BIRC2
GO:1901700~response to oxygen-containing compound	42	12.3894	0.0241567	SP100, LEPROT, ENY2, ROCK1, STXBP3, HMGB2, PTPRK, HDAC9, HSP90B1, UFL1, TUBA1A, GNG2, SESN3, DHX36, AP3S1, ATP7A, RAB11FIP2, B2M, SOX4, OSBPL8, ANXA1, CBX3, CAV2, CAV1, TCF12, BRAF, DYNLL1, WDR35, TGFBR2, SOD1, MMP13, GNAQ, CAT, COL4A6, NDUFAF2, PDCD4, TAB2, LAMTOR2, PHIP, PAM, BIRC2, CPEB4
GO:0007179~transforming growth factor beta receptor signaling pathway	9	2.65487	0.0242269	CDKN2B, CAV2, PEG10, BRMS1L, CAV1, LPXN, PTPRK, MAP3K7, TGFBR2
GO:0021884~forebrain neuron development	4	1.17994	0.0245286	UQCRQ, ATP7A, SCYL2, ROBO1
GO:0060323~head morphogenesis	4	1.17994	0.0245286	NIPBL, PAX9, ARID5B, BRAF
GO:0045920~negative regulation of exocytosis	4	1.17994	0.0245286	ANXA1, STXBP3, BRAF, IL13RA2
GO:0007224~smoothened signaling pathway	7	2.0649	0.024649	DYNC2H1, TUBA1A, KIAA0586, ARL3, IFT57, PRKACB, TGFBR2
GO:0021859~pyramidal neuron differentiation	3	0.884956	0.024733	UQCRQ, ATP7A, SCYL2
GO:0072583~clathrin-dependent endocytosis	6	1.76991	0.0250391	ROCK1, WASL, AP3S1, FNBP1L, SCYL2, PICALM
GO:0032535~regulation of cellular component size	14	4.12979	0.0252711	NCKAP1, EPHA7, BMPR2, TWF1, WASL, ADD3, RTN4, RASA1, CFL2, AKT3, ATP7A, TMSB10, PFN2, PICALM
GO:0070507~regulation of microtubule cytoskeleton organization	9	2.65487	0.0254463	CYLD, ROCK1, ARL3, TPR, CHMP2B, CKAP2, MPDZ, MAP9, CAMSAP2
GO:0032388~positive regulation of intracellular transport	10	2.94985	0.0256165	SH3GLB1, UBL5, MTMR2, LEPROT, BMPR2, TMEM30A, TPR, TOMM7, ANK3, CEP290
GO:0033157~regulation of intracellular protein transport	11	3.24484	0.0256839	SH3GLB1, UBL5, SP100, LEPROT, BMPR2, TMEM30A, PKIA, TPR, TOMM7, ANK3, CEP290
GO:1905515~non-motile cilium assembly	5	1.47493	0.025957	DYNC2H1, EXOC5, IFT57, DYNLL1, CEP290
GO:0009416~response to light stimulus	12	3.53982	0.0262415	ITGB1, USP47, TUBA1A, GNAQ, DHX36, CAT, CIRBP, USP1, FBXL17, BRAF, PTPRK, HMGN1
GO:0043200~response to amino acid	7	2.0649	0.0262537	UFL1, TUBA1A, SESN3, COL4A6, LAMTOR2, ATP7A, CPEB4
GO:0045786~negative regulation of cell cycle	14	4.12979	0.0263006	USP47, CDKN2B, CDKN2C, SMARCA5, PTPRK, ETAA1, RAD21, TPR, PDCD4, RAD17, NBN, SPDL1, PRKACB, SOX4
GO:0048513~animal organ development	77	22.7139	0.0265271	ITGB1, TOP2B, BMPR2, BNC2, TNFAIP6, HMGB2, PTPRK, ROBO1, UFL1, NIPBL, TUBA1A, SGCB, CFL2, AKT3, ACADM, ATP7A, IFT57, AZI2, B2M, CEP290, SCYL2, SOX4, HMGN1, PRMT6, DYNC2H1, EPHA5, IL11, EPHA7, ANXA1, LMO4, MYH15, TCF12, TET2, ARID5B, DYNLL1, WDR35, PTBP3, TGFBR2, MMP13, TFDP2, IRF1, CAT, PAX9, ZFPM2, BIRC2, STXBP3, ROCK1, ARL3, RHOBTB3, TWIST1, HDAC9, RTN4, FXR1, IFI16, DHX36, HAS2, CDKN2B, PCDH9,…
GO:0065007~biological regulation	240	70.7965	0.0268638	NCKAP1, SMC6, FNBP1L, HERC5, RPS6KA6, PEG10, AKT3, B2M, PRKACB, SOX4, RPS12, DYNC2H1, EPHA5, EPHA7, CIRBP, ACSL4, ANK3, RFX7, SUB1, HECW2, GUF1, ZNF711, ZFPM2, ASF1A, CGGBP1, PFN2, MTMR2, BEX1, STXBP3, DCUN1D5, TWIST1, TWF1, VPS26A, HTATSF1, MYL12B, SNX3, FXR1, SCFD1, RAD21, DHX36, SNX7, RAB11FIP2, MAP9, S100A10, SRPK2, SMARCA5, NR2F1, CDC7, BRAF, LARP4, SMARCA1, GNG11, PBX1, CYLD, CCDC88A, LPAR6…
GO:0090398~cellular senescence	6	1.76991	0.0269849	PRMT6, CDKN2B, AKT3, TWIST1, SMC6, B2M
GO:0061178~regulation of insulin secretion involved in cellular response to glucose stimulus	5	1.47493	0.027208	EPHA5, ENY2, NDUFAF2, DYNLL1, HMGN3
GO:1902904~negative regulation of supramolecular fiber organization	8	2.35988	0.027478	CKAP2, TWF1, PFDN4, ADD3, TMSB10, PAK2, PFN2, CAMSAP2
GO:1990778~protein localization to cell periphery	12	3.53982	0.0282107	ITGB1, CCDC88A, ROCK1, ARL3, CAV1, GOPC, ANK3, EXOC5, RAB11FIP2, GBP1, S100A10, PICALM
GO:0030072~peptide hormone secretion	10	2.94985	0.0284391	EPHA5, ENY2, ANXA1, STXBP3, NDUFAF2, ACSL4, RAB11FIP2, DYNLL1, HMGN3, SOX4
GO:0060249~anatomical structure homeostasis	15	4.42478	0.0285136	SP100, CAV1, LCA5, SMC6, SOD1, NELL2, TUBA1A, CFL2, DHX36, HNRNPA2B1, AKT3, CHMP2B, POT1, NBN, B2M
GO:0032990~cell part morphogenesis	19	5.60472	0.0294376	ITGB1, EPHA5, NCKAP1, TOP2B, EPHA7, BMPR2, LMO4, USP33, BRAF, ANK3, WASL, RTN4, ROBO1, NELL2, ENAH, SNX2, DHX36, ATP7A, PICALM
GO:0010632~regulation of epithelial cell migration	11	3.24484	0.0295057	SP100, BMPR2, ANXA1, AKT3, VEGFC, HAS2, PRCP, HDAC9, RTN4, PFN2, TGFBR2
GO:1905314~semi-lunar valve development	4	1.17994	0.0299022	BMPR2, ROCK1, TWIST1, ROBO1
GO:0048667~cell morphogenesis involved in neuron differentiation	17	5.01475	0.0299237	ITGB1, EPHA5, TOP2B, EPHA7, BMPR2, LMO4, USP33, BRAF, ANK3, WASL, RTN4, ROBO1, SOD1, NELL2, ENAH, DHX36, PICALM
GO:0061024~membrane organization	28	8.25959	0.030016	ITGB1, ROCK1, UBXN2A, WASL, FNBP1L, RTN4, SNX3, EMC2, AP3S1, RAB11FIP2, GBP1, S100A10, SH3GLB1, OSBPL8, TMEM30A, ANXA1, CAV2, VTA1, CAV1, VRK1, ANK3, SOD1, CCDC88A, CHMP2B, TOMM7, GOPC, EXOC5, PICALM
GO:0044763~single-organism cellular process	216	63.7168	0.0301797	NCKAP1, SMC6, FNBP1L, HERC5, RPS6KA6, PEG10, AKT3, HMCN1, B2M, PRKACB, SOX4, RPS12, DYNC2H1, EPHA5, EPHA7, ACSL4, ANK3, HECW2, ZFPM2, ASF1A, PFN2, MTMR2, BEX1, STXBP3, TWIST1, TWF1, MYL12B, SNX3, FXR1, SCFD1, SNX2, RAD21, DHX36, SNX7, RAB11FIP2, MAP9, S100A10, SRPK2, SMARCA5, NR2F1, CDC7, BRAF, SMARCA1, PBX1, DERA, CYLD, CCDC88A, LPAR6, PKIA, NDUFAF2, REL, RAD17, PAM, CPEB4, TOP2B, COX7B, HIBADH,…
GO:0051783~regulation of nuclear division	10	2.94985	0.0304157	NIPBL, CAV2, HECW2, RAD21, TPR, CHMP2B, SMARCA5, PHIP, SPDL1, MAP9
GO:0060411~cardiac septum morphogenesis	5	1.47493	0.0311745	BMPR2, ZFPM2, SOX4, TGFBR2, ROBO1
GO:0050792~regulation of viral process	11	3.24484	0.0311762	SNX3, HERC5, SRPK2, TOP2B, SP100, IFI16, CAV2, ZDHHC20, CHMP2B, PKN2, BIRC2
GO:0060485~mesenchyme development	11	3.24484	0.0312572	BMPR2, BNC2, ROCK1, PDCD4, FBXL17, TWIST1, HAS2, ZFPM2, RTN4, TGFBR2, ROBO1
GO:0010647~positive regulation of cell communication	43	12.6844	0.031369	ITGB1, BMPR2, ROCK1, DDX1, NLRC5, NTS, RTN4, ROBO1, DHX36, AKT3, SHOC2, ITGAV, PAK2, MAP3K7, SOX4, RPS12, DYNC2H1, OSBPL8, IL11, USP47, CDKN2B, TNFRSF12A, CAV2, CAV1, ACSL4, BRAF, ANK3, DYNLL1, WDR35, PJA2, TGFBR2, SOD1, CYLD, CCDC88A, LPAR6, CAT, REL, PDCD4, TAB2, RPS20, LAMTOR2, PHIP, BIRC2
GO:1901701~cellular response to oxygen-containing compound	30	8.84956	0.0314376	LEPROT, ENY2, HMGB2, PTPRK, HDAC9, HSP90B1, GNG2, SESN3, DHX36, AP3S1, ATP7A, RAB11FIP2, B2M, SOX4, OSBPL8, ANXA1, CBX3, CAV2, CAV1, DYNLL1, WDR35, SOD1, GNAQ, CAT, COL4A6, NDUFAF2, PDCD4, LAMTOR2, PHIP, CPEB4
GO:0043254~regulation of protein complex assembly	16	4.71976	0.0316302	ATF7IP, SH3GLB1, NCKAP1, LMO4, ARL3, TWIST1, TWF1, WASL, ADD3, CAMSAP2, RASA1, SUB1, DHX36, TMSB10, BIRC2, PFN2
GO:0010761~fibroblast migration	4	1.17994	0.03182	ITGB1, ARID5B, BRAF, LAMTOR2
GO:0034446~substrate adhesion-dependent cell spreading	6	1.76991	0.0322624	LPXN, HAS2, BRAF, ITGAV, GBP1, S100A10
GO:0051093~negative regulation of developmental process	29	8.55457	0.0323831	ITGB1, MTMR2, BMPR2, ROCK1, TNFAIP6, TWIST1, RTN4, ROBO1, RPS6KA6, AKT3, ITGAV, GBP1, B2M, PRKACB, SS18, CDKN2B, EPHA7, ANXA1, CAV1, NR2F1, VEGFC, PBX1, TGFBR2, SOD1, IRF1, BRMS1L, PHF14, PDCD4, ZFPM2
GO:0007166~cell surface receptor signaling pathway	62	18.2891	0.0325067	ITGB1, BMPR2, TNFAIP6, HMGB2, PTPRK, IL1RAP, ROBO1, TUBA1A, PEG10, ITGAV, AP3S1, IL13RA2, IFT57, AZI2, PRKACB, MAP3K7, SCYL2, SOX4, RPS12, DYNC2H1, EPHA5, SS18, USP47, EPHA7, ANXA1, TNFRSF12A, ARID5B, TGFBR2, RASA1, SUB1, IRF1, COL4A6, PHIP, BIRC2, SP100, MTMR2, LEPROT, ARL3, GPR87, NLRC5, TANK, RTN4, LPXN, SHOC2, PAK2, GBP1, ZC3H15, OSBPL8, CDKN2B, YTHDF3, CAV2, CAV1, VEGFC, BRAF, CYLD, CCDC88A,…
GO:0050680~negative regulation of epithelial cell proliferation	8	2.35988	0.0325228	CDKN2B, CAV2, CAV1, CASK, PTPRK, IFT57, B2M, ROBO1
GO:0010634~positive regulation of epithelial cell migration	8	2.35988	0.0325228	BMPR2, ANXA1, AKT3, VEGFC, HAS2, HDAC9, RTN4, TGFBR2
GO:0032456~endocytic recycling	5	1.47493	0.0325683	SNX3, ACAP2, VPS26A, SNX7, ANKRD50
GO:0072658~maintenance of protein location in membrane	2	0.589971	0.0327291	CCDC88A, ANK3
GO:0072660~maintenance of protein location in plasma membrane	2	0.589971	0.0327291	CCDC88A, ANK3
GO:0048598~embryonic morphogenesis	18	5.30973	0.0332885	ITGB1, DYNC2H1, BMPR2, ROCK1, LMO4, VEGFC, TWIST1, RNF2, PBX1, TGFBR2, SOD1, NIPBL, SP3, ITGAV, IFT57, CEP290, PRKACB, SOX4
GO:0060337~type I interferon signaling pathway	5	1.47493	0.033998	SP100, YTHDF3, NLRC5, AZI2, TANK
GO:0002221~pattern recognition receptor signaling pathway	8	2.35988	0.0340978	CYLD, CAV1, IRF1, RAB11FIP2, MAP3K7, RTN4, BIRC2, PJA2
GO:0010648~negative regulation of cell communication	35	10.3245	0.0341102	ITGB1, MTMR2, LEPROT, ENY2, TNFAIP6, NLRC5, HMGB2, TWIST1, TANK, UACA, ROBO1, UFL1, RPS6KA6, SESN3, PEG10, LPXN, ITGAV, GBP1, PRKACB, SCYL2, IL11, USP47, YTHDF3, CAV2, CAV1, BRAF, ARHGAP24, DNAJA1, CYLD, BRMS1L, RASA1, PHF14, NDUFAF2, PDCD4, PHIP
GO:0048812~neuron projection morphogenesis	18	5.30973	0.0341607	ITGB1, EPHA5, NCKAP1, TOP2B, EPHA7, BMPR2, LMO4, USP33, BRAF, ANK3, WASL, RTN4, ROBO1, NELL2, ENAH, DHX36, ATP7A, PICALM
GO:0007005~mitochondrion organization	17	5.01475	0.0343598	SH3GLB1, LEPROT, NDUFA5, CAV2, NDUFA12, NDUFB4, NDUFB3, NDUFA1, NDUFC1, WDR35, UBL5, FUNDC1, AKT3, NDUFAF2, TOMM7, SNX7, ATP7A
GO:0003279~cardiac septum development	6	1.76991	0.0345413	BMPR2, LMO4, ZFPM2, SOX4, TGFBR2, ROBO1
GO:0006892~post-Golgi vesicle-mediated transport	6	1.76991	0.0345413	SCFD1, ARL3, GOPC, ANK3, EXOC5, AP3S1
GO:1904063~negative regulation of cation transmembrane transport	6	1.76991	0.0345413	CAMK2D, HECW2, CAV1, C4ORF3, ANK3, ATP7A
GO:0032387~negative regulation of intracellular transport	6	1.76991	0.0345413	SNX3, SP100, PKIA, TPR, BRAF, IL13RA2
GO:0010649~regulation of cell communication by electrical coupling	3	0.884956	0.0348924	CAMK2D, CAV1, ANK3
GO:0009615~response to virus	13	3.83481	0.0349946	DDX1, NLRC5, IFI44, TANK, IFI44L, HERC5, IFI16, IRF1, DHX36, AZI2, GBP1, BIRC2, GBP3
GO:0032844~regulation of homeostatic process	16	4.71976	0.0350552	EPHA5, ENY2, CAMK2D, ANXA1, CAV1, HMGB2, ANK3, SMC6, DYNLL1, DHX36, HNRNPA2B1, NDUFAF2, POT1, NBN, HMGN3, B2M
GO:0050684~regulation of mRNA processing	7	2.0649	0.0353148	FXR1, SRPK2, SLTM, YTHDC1, DHX36, HNRNPA2B1, CIRBP
GO:0023057~negative regulation of signaling	35	10.3245	0.0353178	ITGB1, MTMR2, LEPROT, ENY2, TNFAIP6, NLRC5, HMGB2, TWIST1, TANK, UACA, ROBO1, UFL1, RPS6KA6, SESN3, PEG10, LPXN, ITGAV, GBP1, PRKACB, SCYL2, IL11, USP47, YTHDF3, CAV2, CAV1, BRAF, ARHGAP24, DNAJA1, CYLD, BRMS1L, RASA1, PHF14, NDUFAF2, PDCD4, PHIP
GO:0021872~forebrain generation of neurons	5	1.47493	0.0354638	UQCRQ, ATP7A, B2M, SCYL2, ROBO1
GO:0006754~ATP biosynthetic process	6	1.76991	0.0357173	NDUFA5, NDUFA12, NDUFB4, NDUFB3, NDUFA1, NDUFC1
GO:1903036~positive regulation of response to wounding	6	1.76991	0.0357173	ITGB1, ANXA1, BRAF, ATP7A, TGFBR2, S100A10
GO:2000369~regulation of clathrin-dependent endocytosis	4	1.17994	0.035844	ROCK1, WASL, SCYL2, PICALM
GO:2000826~regulation of heart morphogenesis	4	1.17994	0.035844	BMPR2, TWIST1, TGFBR2, ROBO1
GO:0016569~covalent chromatin modification	16	4.71976	0.0366781	PRMT6, ATF7IP, ENY2, CAMK2D, TET2, SMARCA5, UBE2E1, TWIST1, VRK1, HDAC9, RNF2, UFL1, NIPBL, BRMS1L, PHF14, MAP3K7
GO:0033674~positive regulation of kinase activity	17	5.01475	0.0369472	EPHA5, OSBPL8, EPHA7, BMPR2, LMO4, VEGFC, TGFBR2, ROBO1, SOD1, ETAA1, CCDC88A, DBF4, TAB2, NBN, MNAT1, MAP3K7, PAK2
GO:0030330~DNA damage response, signal transduction by p53 class mediator	5	1.47493	0.0369656	SP100, RPS6KA6, TWIST1, NBN, SOX4
GO:0071357~cellular response to type I interferon	5	1.47493	0.0369656	SP100, YTHDF3, NLRC5, AZI2, TANK
GO:0022613~ribonucleoprotein complex biogenesis	16	4.71976	0.0376233	SRPK2, YTHDF3, YTHDC1, SCAF11, DDX1, CIRBP, PSIP1, RPL35A, DDX10, HTATSF1, RPF1, SNRPD2, SNRPG, EIF3E, SNRPF, RPS24
GO:0050679~positive regulation of epithelial cell proliferation	9	2.65487	0.0376844	BMPR2, CAV2, AKT3, HMGB2, VEGFC, TWIST1, HAS2, ATP7A, RTN4
GO:0051052~regulation of DNA metabolic process	17	5.01475	0.0379401	ATF7IP, TOP2B, ENY2, BMPR2, SMARCA5, TWIST1, CDC7, SMC6, CCDC88A, DBF4, SUB1, DHX36, HNRNPA2B1, USP1, POT1, RAD17, NBN
GO:0031401~positive regulation of protein modification process	32	9.43953	0.0381248	BMPR2, ROCK1, DCUN1D5, TANK, ROBO1, FXR1, NIPBL, NBN, PAK2, MAP3K7, SOX4, OSBPL8, IL11, EPHA7, PPP1R12A, CAV2, CAV1, SMARCA5, VEGFC, BRAF, PJA2, TGFBR2, SOD1, ETAA1, CCDC88A, RAP2B, DBF4, TAB2, LAMTOR2, MNAT1, BIRC2, PFN2
GO:0032231~regulation of actin filament bundle assembly	6	1.76991	0.0381426	CCDC88A, ROCK1, BRAF, PAK2, PFN2, S100A10
GO:0045806~negative regulation of endocytosis	5	1.47493	0.0385036	SNX3, MTMR2, CAV1, ITGAV, PICALM
GO:0036260~RNA capping	3	0.884956	0.0385804	SNRPD2, SNRPG, SNRPF
GO:0051048~negative regulation of secretion	8	2.35988	0.0386248	IL11, ENY2, ANXA1, STXBP3, NDUFAF2, BRAF, ACSL4, IL13RA2
GO:0072659~protein localization to plasma membrane	10	2.94985	0.0386978	ITGB1, CCDC88A, ROCK1, GOPC, ANK3, EXOC5, RAB11FIP2, GBP1, S100A10, PICALM
GO:0006403~RNA localization	9	2.65487	0.0391913	ENY2, SSB, YTHDC1, PEG10, TPR, DHX36, HNRNPA2B1, IGF2BP3, TGFBR2
GO:0030198~extracellular matrix organization	11	3.24484	0.0393511	ITGB1, MMP13, P4HA1, TNFAIP6, CAV2, CAV1, COL4A6, HAS2, TLL1, HMCN1, ATP7A
GO:0048524~positive regulation of viral process	6	1.76991	0.0393921	SRPK2, TOP2B, CAV2, ZDHHC20, CHMP2B, PKN2
GO:0043062~extracellular structure organization	11	3.24484	0.0396407	ITGB1, MMP13, P4HA1, TNFAIP6, CAV2, CAV1, COL4A6, HAS2, TLL1, HMCN1, ATP7A
GO:0034121~regulation of toll-like receptor signaling pathway	5	1.47493	0.0400778	CAV1, IRF1, RTN4, BIRC2, PJA2
GO:0051057~positive regulation of small GTPase mediated signal transduction	5	1.47493	0.0400778	LPAR6, SHOC2, ITGAV, RTN4, ROBO1
GO:1903214~regulation of protein targeting to mitochondrion	4	1.17994	0.0401169	SH3GLB1, UBL5, LEPROT, TOMM7
GO:0007018~microtubule-based movement	11	3.24484	0.0405085	DYNC2H1, DYNC1I2, TUBA1A, ARL3, LCA5, AP3S1, IFT57, DYNLL1, WDR35, KTN1, SOD1
GO:0033047~regulation of mitotic sister chromatid segregation	6	1.76991	0.0406664	NIPBL, HECW2, RAD21, TPR, SMARCA5, SPDL1
GO:0031324~negative regulation of cellular metabolic process	68	20.059	0.0406927	BMPR2, HMGB2, PTPRK, PHF6, UFL1, RPS6KA6, NIPBL, ITGAV, NBN, SOX4, PRMT6, USP47, LMO4, CIRBP, ARID5B, DYNLL1, WDR35, ZHX1, PTBP3, TFDP2, SUB1, IRF1, PAX9, POT1, ZFPM2, BIRC2, CGGBP1, ASF1A, SP100, MTMR2, ROCK1, GPR87, CREM, TWIST1, HDAC9, RNF2, RTN4, FXR1, SCFD1, IFI16, TPR, DHX36, IGF2BP3, PAK2, GBP1, ATF7IP, CDKN2B, CDKN2C, YTHDF3, CBX3, CAV1, SMARCA5, NR2F1, DNAJA1, CYLD, PKIA, GNAQ, BRMS1L, S…
GO:0007409~axonogenesis	14	4.12979	0.0408678	ITGB1, EPHA5, TOP2B, EPHA7, BMPR2, LMO4, USP33, BRAF, ANK3, RTN4, ROBO1, NELL2, ENAH, PICALM
GO:0009792~embryo development ending in birth or egg hatching	19	5.60472	0.0413831	ITGB1, BMPR2, YTHDC1, LMO4, TWIST1, ACSL4, PHF6, RTN4, PBX1, TGFBR2, NIPBL, LPAR6, SP3, NBN, IFT57, ZFPM2, ATP7A, PRKACB, SOX4
GO:0045892~negative regulation of transcription, DNA-templated	33	9.73451	0.0415823	SP100, HMGB2, CREM, TWIST1, PTPRK, HDAC9, PHF6, RNF2, NIPBL, IFI16, TPR, PRMT6, ATF7IP, USP47, CBX3, LMO4, CAV1, SMARCA5, NR2F1, ARID5B, ZHX1, TFDP2, PKIA, IRF1, BRMS1L, SP3, PAX9, HNRNPA2B1, PHF14, PDCD4, ZFPM2, CGGBP1, ASF1A
GO:1990542~mitochondrial transmembrane transport	7	2.0649	0.0416117	NDUFA5, NDUFA12, NDUFB4, NDUFB3, NDUFA1, TOMM7, NDUFC1
GO:0072331~signal transduction by p53 class mediator	7	2.0649	0.0416117	SP100, RPS6KA6, IFI16, TWIST1, RPS20, NBN, SOX4
GO:0008154~actin polymerization or depolymerization	9	2.65487	0.0417707	ENAH, NCKAP1, CFL2, RASA1, TWF1, WASL, ADD3, TMSB10, PFN2
GO:0007178~transmembrane receptor protein serine/threonine kinase signaling pathway	13	3.83481	0.0421052	CDKN2B, BMPR2, TNFAIP6, CAV2, CAV1, PTPRK, TGFBR2, SUB1, PEG10, BRMS1L, PDCD4, LPXN, MAP3K7
GO:0000122~negative regulation of transcription from RNA polymerase II promoter	25	7.37463	0.0423184	SP100, HMGB2, CREM, TWIST1, HDAC9, PHF6, RNF2, NIPBL, IFI16, TPR, PRMT6, ATF7IP, CBX3, LMO4, CAV1, NR2F1, ARID5B, ZHX1, PKIA, BRMS1L, SP3, HNRNPA2B1, PHF14, ZFPM2, CGGBP1
GO:0010837~regulation of keratinocyte proliferation	4	1.17994	0.0423457	CASK, HAS2, PTPRK, IFT57
GO:0031346~positive regulation of cell projection organization	13	3.83481	0.0423899	NCKAP1, TMEM30A, BMPR2, TWF1, BRAF, WASL, DYNLL1, FNBP1L, ROBO1, SNX3, CCDC88A, DHX36, ATP7A
GO:0045019~negative regulation of nitric oxide biosynthetic process	3	0.884956	0.0424094	CAV1, DYNLL1, WDR35
GO:1904406~negative regulation of nitric oxide metabolic process	3	0.884956	0.0424094	CAV1, DYNLL1, WDR35
GO:0050657~nucleic acid transport	8	2.35988	0.0424231	ENY2, SSB, YTHDC1, PEG10, TPR, HNRNPA2B1, IGF2BP3, TGFBR2
GO:0050658~RNA transport	8	2.35988	0.0424231	ENY2, SSB, YTHDC1, PEG10, TPR, HNRNPA2B1, IGF2BP3, TGFBR2
GO:1902600~hydrogen ion transmembrane transport	8	2.35988	0.0424231	COX7B, NDUFA5, UQCRQ, NDUFA12, NDUFB4, NDUFB3, NDUFA1, NDUFC1
GO:0061041~regulation of wound healing	8	2.35988	0.0424231	ITGB1, ANXA1, TNFRSF12A, GNAQ, CAV1, CASK, TGFBR2, S100A10
GO:0080135~regulation of cellular response to stress	22	6.48968	0.0424683	USP25, USP47, ENY2, CAV1, LANCL1, SMARCA5, TWIST1, BRAF, PJA2, SOD1, DNAJA1, FXR1, ETAA1, CYLD, UFL1, AKT3, USP1, PDCD4, POT1, MAP3K7, B2M, SOX4
GO:1903507~negative regulation of nucleic acid-templated transcription	33	9.73451	0.0427914	SP100, HMGB2, CREM, TWIST1, PTPRK, HDAC9, PHF6, RNF2, NIPBL, IFI16, TPR, PRMT6, ATF7IP, USP47, CBX3, LMO4, CAV1, SMARCA5, NR2F1, ARID5B, ZHX1, TFDP2, PKIA, IRF1, BRMS1L, SP3, PAX9, HNRNPA2B1, PHF14, PDCD4, ZFPM2, CGGBP1, ASF1A
GO:0043523~regulation of neuron apoptotic process	9	2.65487	0.0435216	SRPK2, EPHA7, ROCK1, RASA1, GBE1, LANCL1, BRAF, SOD1, CPEB4
GO:0044248~cellular catabolic process	48	14.1593	0.0437896	MTMR2, ROCK1, HIBADH, UBXN2A, PON2, USP33, TWIST1, VPS26A, FNBP1L, TRHDE, HSP90B1, HERC5, UFL1, SCFD1, SH3BGRL, SESN3, IFI16, FUNDC1, DHX36, ESD, USP1, ACADM, UBXN4, SNX7, MAP3K7, SH3GLB1, USP25, USP47, SSB, ERAP2, VTA1, CAV1, TET2, FBXL17, UBE2E1, PJA2, PNRC2, DERA, CYLD, APPBP2, HECW2, CAT, CHMP2B, TOMM7, TAB2, WDFY3, EIF3E, BIRC2
GO:0046879~hormone secretion	11	3.24484	0.0440075	EPHA5, IL11, ENY2, ANXA1, STXBP3, NDUFAF2, ACSL4, RAB11FIP2, DYNLL1, HMGN3, SOX4
GO:0010506~regulation of autophagy	12	3.53982	0.0440319	SH3GLB1, UFL1, SCFD1, SESN3, IFI16, ROCK1, USP33, TOMM7, VPS26A, TAB2, SNX7, MAP3K7
GO:0060548~negative regulation of cell death	27	7.9646	0.0445126	ITGB1, ROCK1, GBE1, HMGB2, TWIST1, HSP90B1, UFL1, ITGAV, PAK2, SOX4, USP47, ANXA1, CAV1, BRAF, SOD1, DNAJA1, RASA1, CAT, CHMP2B, REL, PDCD4, TAX1BP1, PHIP, MNAT1, ZFPM2, BIRC2, CPEB4
GO:0002376~immune system process	63	18.5841	0.0445337	ITGB1, TOP2B, TNFAIP6, HMGB2, WASL, PTPRK, IL1RAP, IFI44L, HERC5, UFL1, NUDCD1, NBN, IL13RA2, ATP7A, AZI2, B2M, MAP3K7, SOX4, PRMT6, IL11, ANXA1, LMO4, TCF12, TET2, PJA2, PTBP3, TGFBR2, IRF1, BIRC2, SP100, STXBP3, ROCK1, DDX1, NLRC5, TWIST1, NTS, HDAC9, TANK, RTN4, IFI16, DHX36, LPXN, RAB11FIP2, PAK2, GBP1, GBP3, SRPK2, CDKN2B, ERAP2, YTHDF3, CAV1, VEGFC, IFI44, BRAF, PBX1, SOD1, CYLD, SP3, C12OR…
GO:0043616~keratinocyte proliferation	4	1.17994	0.0446354	CASK, HAS2, PTPRK, IFT57
GO:0031063~regulation of histone deacetylation	4	1.17994	0.0446354	PRMT6, CAMK2D, NIPBL, SMARCA5
GO:0061082~myeloid leukocyte cytokine production	4	1.17994	0.0446354	DDX1, DHX36, TWIST1, RTN4
GO:0003197~endocardial cushion development	4	1.17994	0.0446354	BMPR2, TWIST1, TGFBR2, ROBO1
GO:0002720~positive regulation of cytokine production involved in immune response	5	1.47493	0.0450174	DDX1, DHX36, MAP3K7, B2M, RTN4
GO:0061564~axon development	15	4.42478	0.0450628	ITGB1, EPHA5, TOP2B, EPHA7, BMPR2, LMO4, USP33, BRAF, ANK3, RTN4, CAMSAP2, ROBO1, NELL2, ENAH, PICALM
GO:2001252~positive regulation of chromosome organization	9	2.65487	0.0453775	ATF7IP, NIPBL, RAD21, TPR, DHX36, HNRNPA2B1, SMARCA5, POT1, NBN
GO:0051236~establishment of RNA localization	8	2.35988	0.0454627	ENY2, SSB, YTHDC1, PEG10, TPR, HNRNPA2B1, IGF2BP3, TGFBR2
GO:0010769~regulation of cell morphogenesis involved in differentiation	11	3.24484	0.0455646	EPHA7, BMPR2, HECW2, DHX36, HAS2, BRAF, PAK2, GBP1, RTN4, S100A10, ROBO1
GO:0032501~multicellular organismal process	149	43.9528	0.0457984	NCKAP1, NDUFA12, IL1RAP, RPS6KA6, CFL2, AKT3, NBN, HMCN1, AZI2, B2M, PRKACB, MAP3K7, SOX4, HMGN1, DYNC2H1, EPHA5, EPHA7, LMO4, MYH15, ARID5B, ACSL4, ANK3, HECW2, ZFPM2, ASF1A, PFN2, MTMR2, BEX1, STXBP3, YTHDC1, DDX1, ARL3, RHOBTB3, CREM, TWIST1, TWF1, NTS, TRHDE, RTN4, CAMSAP2, SNX3, FXR1, DHX36, LPXN, ZC3H13, S100A10, SRPK2, CAV2, CAV1, NR2F1, BRAF, SMARCA1, ARHGAP24, PBX1, CYLD, CCDC88A, LPAR6,…
GO:0071560~cellular response to transforming growth factor beta stimulus	10	2.94985	0.0458521	CDKN2B, CAV2, PEG10, BRMS1L, CAV1, LPXN, PTPRK, MAP3K7, PAK2, TGFBR2
GO:0043542~endothelial cell migration	10	2.94985	0.0458521	ITGB1, SP100, BMPR2, ANXA1, AKT3, VEGFC, LPXN, PRCP, HDAC9, ROBO1
GO:0043434~response to peptide hormone	14	4.12979	0.0462495	OSBPL8, LEPROT, ANXA1, ROCK1, STXBP3, CAV2, CAV1, TCF12, BRAF, HDAC9, SESN3, CAT, PHIP, AP3S1
GO:0097320~plasma membrane tubulation	3	0.884956	0.0463738	SH3GLB1, WASL, FNBP1L
GO:0016239~positive regulation of macroautophagy	5	1.47493	0.0467362	SH3GLB1, SESN3, TOMM7, SNX7, MAP3K7
GO:0034340~response to type I interferon	5	1.47493	0.0467362	SP100, YTHDF3, NLRC5, AZI2, TANK
GO:0071230~cellular response to amino acid stimulus	5	1.47493	0.0467362	SESN3, COL4A6, LAMTOR2, ATP7A, CPEB4
GO:0044765~single-organism transport	63	18.5841	0.0468049	ITGB1, COX7B, BMPR2, NDUFA12, WASL, FNBP1L, TUBA1A, ITGAV, AP3S1, TNPO1, IL13RA2, ATP7A, IFT57, HMGN3, SLC35A5, SCYL2, SOX4, DYNC2H1, EPHA5, IL11, ANXA1, CASK, ACSL4, NDUFC1, ANK3, DYNLL1, WDR35, EXOC5, PFN2, DYNC1I2, CAMK2D, MTMR2, ENY2, STXBP3, ROCK1, ARL3, NDUFB4, NDUFB3, TWIST1, SNX3, TPR, HAS2, RAB11FIP2, S100A10, OSBPL8, TMEM30A, SSB, NDUFA5, VTA1, CAV1, LCA5, NDUFA1, VEGFC, BRAF, SOD1, UQC…
GO:0023061~signal release	14	4.12979	0.0471244	EPHA5, IL11, ENY2, ANXA1, STXBP3, CASK, BRAF, ACSL4, DYNLL1, NDUFAF2, RAB11FIP2, HMGN3, SOX4, PFN2
GO:0000819~sister chromatid segregation	9	2.65487	0.0471893	TOP2B, NIPBL, HECW2, RAD21, TPR, CHMP2B, SMARCA5, SPDL1, PAM
GO:1903533~regulation of protein targeting	8	2.35988	0.0472443	SH3GLB1, UBL5, LEPROT, BMPR2, PKIA, TPR, TOMM7, ANK3
GO:1903828~negative regulation of cellular protein localization	7	2.0649	0.0473677	DNAJA1, SP100, LEPROT, PKIA, GOPC, GBP1, PICALM
GO:0023056~positive regulation of signaling	42	12.3894	0.0477585	ITGB1, BMPR2, ROCK1, DDX1, NLRC5, NTS, RTN4, ROBO1, DHX36, AKT3, SHOC2, ITGAV, PAK2, MAP3K7, SOX4, RPS12, DYNC2H1, OSBPL8, IL11, USP47, CDKN2B, TNFRSF12A, CAV2, CAV1, ACSL4, BRAF, DYNLL1, WDR35, PJA2, TGFBR2, SOD1, CYLD, CCDC88A, LPAR6, CAT, REL, PDCD4, TAB2, RPS20, LAMTOR2, PHIP, BIRC2
GO:0090068~positive regulation of cell cycle process	10	2.94985	0.0484998	NIPBL, ANXA1, DBF4, RAD21, TPR, PKN2, CDC7, PHIP, SOX4, PBX1
GO:0009411~response to UV	7	2.0649	0.0485751	USP47, DHX36, CAT, CIRBP, USP1, PTPRK, HMGN1
GO:2000286~receptor internalization involved in canonical Wnt signaling pathway	2	0.589971	0.048691	CAV1, SCYL2
GO:1990428~miRNA transport	2	0.589971	0.048691	HNRNPA2B1, TGFBR2
GO:0043900~regulation of multi-organism process	14	4.12979	0.0487128	SRPK2, TOP2B, SP100, YTHDF3, ZDHHC20, CAV2, CAV1, SNX3, HERC5, IFI16, CHMP2B, ITGAV, PKN2, BIRC2
GO:0002718~regulation of cytokine production involved in immune response	6	1.76991	0.0488336	DDX1, DHX36, TWIST1, MAP3K7, B2M, RTN4
GO:0002367~cytokine production involved in immune response	6	1.76991	0.0488336	DDX1, DHX36, TWIST1, MAP3K7, B2M, RTN4
GO:0042127~regulation of cell proliferation	41	12.0944	0.0489567	ITGB1, BMPR2, HMGB2, TWIST1, PTPRK, RTN4, ROBO1, UFL1, AKT3, HAS2, ITGAV, ATP7A, IFT57, B2M, SOX4, HMGN1, SRPK2, IL11, SS18, CDKN2B, CDKN2C, ANXA1, CAV2, CAV1, VEGFC, CASK, NAP1L1, BRAF, CDC7, SMARCA1, PBX1, TGFBR2, CCDC88A, IRF1, C18ORF54, PHF14, PDCD4, PHIP, MNAT1, ZFPM2, BIRC2
GO:0048538~thymus development	4	1.17994	0.0493954	LMO4, BRAF, PBX1, SOD1
GO:0010171~body morphogenesis	4	1.17994	0.0493954	NIPBL, PAX9, ARID5B, BRAF
GO:0071900~regulation of protein serine/threonine kinase activity	15	4.42478	0.0494527	CDKN2B, CDKN2C, BMPR2, CAV1, ROBO1, SOD1, DNAJA1, HERC5, ETAA1, DBF4, PKIA, PDCD4, TAB2, MNAT1, MAP3K7
GO:0048584~positive regulation of response to stimulus	54	15.9292	0.0494806	ITGB1, BMPR2, HMGB2, ROBO1, AKT3, ITGAV, ATP7A, B2M, MAP3K7, SOX4, RPS12, DYNC2H1, IL11, USP47, ANXA1, TNFRSF12A, DYNLL1, WDR35, PJA2, TGFBR2, IRF1, CAT, PHIP, BIRC2, ROCK1, DDX1, NLRC5, NTS, RTN4, FXR1, IFI16, DHX36, USP1, LPXN, SHOC2, RAB11FIP2, PAK2, GBP1, S100A10, OSBPL8, CDKN2B, CAV2, CAV1, VEGFC, BRAF, SOD1, CYLD, CCDC88A, LPAR6, REL, PDCD4, LAMTOR2, TAB2, RPS20
GO:0035148~tube formation	7	2.0649	0.0498014	LMO4, TWIST1, IFT57, CEP290, PRKACB, SOX4, SDCCAG8
GO:1902679~negative regulation of RNA biosynthetic process	33	9.73451	0.0498866	SP100, HMGB2, CREM, TWIST1, PTPRK, HDAC9, PHF6, RNF2, NIPBL, IFI16, TPR, PRMT6, ATF7IP, USP47, CBX3, LMO4, CAV1, SMARCA5, NR2F1, ARID5B, ZHX1, TFDP2, PKIA, IRF1, BRMS1L, SP3, PAX9, HNRNPA2B1, PHF14, PDCD4, ZFPM2, CGGBP1, ASF1A
