# Supplementary material for: BAZ2A-RNA mediated association with TOP2A and KDM1A represses genes implicated in prostate cancer
Source: Life Sci Alliance. 2023 Apr 25;6(7):e202301950. doi: 10.26508/lsa.202301950 (PMC10130768; doi:10.26508/lsa.202301950)
Supplement: Supplementary file 13 [file LSA-2023-01950_TableS8.xlsx]

## Sheet: sim_conditions_results_deseq2
	baseMean	log2FC TOP2Ai/DMSO	pvalue
RP11-435I10.3	3.32283	5.11566	0.00063853
RP11-393I2.2	2.2184	4.53233	0.00561475
GBP1P1	4.31962	4.46945	0.00172728
PI16	2.07646	4.43463	0.0081972
DSCR4	2.02676	4.40652	0.0105064
NARSP2	1.9506	4.34027	0.0142748
BCAS2P2	1.8969	4.30716	0.013667
GAPDHP55	1.87782	4.29555	0.0127754
OR13G1	1.74442	4.18531	0.0157142
RP11-556O9.4	1.74442	4.18531	0.0157142
RN7SL370P	1.74243	4.18403	0.0186451
SPINT5P	1.73588	4.17975	0.0162255
CTD-3088G3.8	1.72334	4.17141	0.0175784
CASQ1	1.72235	4.17064	0.0187996
RP11-265B8.5	1.71281	4.16411	0.0202306
LRRN4	1.60902	4.06474	0.0256183
RP11-338L22.2	1.60048	4.05836	0.0233367
RP11-267M23.6	1.57841	4.04245	0.0241999
AC097381.1	1.445	3.91002	0.0344826
CEACAM3	1.445	3.91002	0.0344826
RP11-6O2.2	1.43447	3.90156	0.0338073
RP11-119H12.4	1.43347	3.90084	0.0364689
DRAXIN	1.42692	3.89561	0.0373687
LLNLR-268E12.1	1.42493	3.89395	0.0335403
RP11-690I21.1	1.42493	3.89395	0.0335403
RP4-597J3.1	1.41738	3.88784	0.0396582
ERMN	1.41439	3.88551	0.0350023
RP11-62H7.2	1.41439	3.88551	0.0350023
RP5-1100E15.4	1.40485	3.87766	0.0383023
ADAMTS7P3	1.40285	3.87587	0.0406507
TRIM22	16.5957	3.87526	1.35369e-07
COX6CP1	5.20811	3.85848	0.00227637
RP5-940J5.3	2.84781	3.85126	0.0116678
RP11-635N19.3	2.841	3.83765	0.0130314
COL14A1	2.73622	3.77322	0.016248
CTD-2619J13.9	2.69233	3.76513	0.0147967
AC016656.1	2.7076	3.76053	0.0147815
RPL7P14	2.69804	3.74954	0.0188962
C1orf100	1.26945	3.72658	0.0499398
SNORA25	2.49869	3.6555	0.0218672
ADAMTS14	2.4937	3.65288	0.023704
C4BPAP2	2.33922	3.55428	0.0292504
MTND5P2	2.2557	3.47324	0.0356228
MEG9	2.25868	3.46676	0.0313543
ST3GAL1P1	2.21536	3.46519	0.0335365
AGMO	2.20881	3.46167	0.0325564
RP11-138E16.1	2.24614	3.46004	0.0320779
RP11-343C2.10	2.18774	3.45021	0.0345269
EFTUD1P1	2.18274	3.44688	0.0426487
RGS22	3.91958	3.42935	0.0104599
IDO1	19.7811	3.38244	8.59983e-09
TAS2R12	2.10677	3.36412	0.0454429
RP4-633I8.4	2.05234	3.34717	0.0411462
CTC-484P3.3	2.03126	3.3348	0.0445112
PHYHD1	2.02072	3.32825	0.0490727
CHRM5	3.60563	3.30316	0.0169655
CFH	7.36288	3.26182	0.000506635
LINC00507	3.76105	3.2394	0.017303
RP11-554A11.7	3.41493	3.07856	0.0312079
EIF4EBP1P1	3.20834	3.02897	0.0294307
GBP4	93.5273	2.97483	3.3757e-30
MPL	3.05111	2.9681	0.0321079
RP11-748C4.1	3.00571	2.92412	0.0495367
RP11-552F3.9	4.28092	2.90062	0.0123241
SUMO1P3	2.85704	2.88816	0.0441266
SPINK7	2.8793	2.85207	0.0480443
RPTN	19.6237	2.84886	1.5104e-07
RP11-588H23.3	4.17458	2.8415	0.0162187
KRT6A	9.74715	2.83744	0.000218623
RP11-159F24.5	2.69602	2.79304	0.049473
CTD-2384B11.2	2.74015	2.79094	0.0496316
APOL1	22.8036	2.75083	2.33121e-08
REN	5.28262	2.69647	0.00912137
AC159540.1	3.82919	2.67029	0.022555
RP4-724E13.2	3.857	2.64601	0.0268359
CDC42-IT1	4.95639	2.61577	0.0105892
APOD	14.4038	2.57814	1.55539e-05
RP11-164J13.1	3.45583	2.55683	0.0392676
RP11-944L7.4	3.56213	2.50802	0.0385406
HGF	7.1402	2.49106	0.00432251
RP11-261C10.7	3.59016	2.47718	0.0485492
CTC-448F2.6	3.42972	2.43882	0.0476309
CD7	7.53105	2.40001	0.00329573
KCNU1	5.09537	2.35142	0.0195539
NEFH	4.15818	2.3438	0.029733
SLC15A3	5.05696	2.32881	0.0190113
CEACAM6	55.2778	2.30052	2.27984e-14
NBPF7	7.84768	2.22897	0.00427554
WFDC13	18.6476	2.22659	1.65682e-05
CTD-2104P17.1	8.62461	2.21379	0.00351748
CASP1	3.8635	2.18502	0.0462462
ST6GALNAC1	20.136	2.18224	9.21802e-06
YBX1P8	3.84996	2.18049	0.0466962
MUC13	74.9193	2.16942	4.26097e-18
RP11-141M3.6	4.67599	2.13603	0.0318976
GJB5	16.509	2.11766	7.09738e-05
CD79A	8.42733	2.11169	0.0043757
RP11-177G23.2	4.47464	2.09942	0.0373576
PRB1	4.45754	2.08248	0.042909
RP4-800G7.2	16.0102	2.06713	0.000100253
GBP1	173.128	2.05989	2.66253e-33
RFTN2	10.9341	2.0582	0.00245049
RP11-198M15.1	6.26774	2.04428	0.0164897
MYO5BP2	5.26899	2.03536	0.0298514
SERPINB2	19.6158	2.02456	5.85826e-05
F5	6.06142	2.02454	0.0194624
RP11-216N14.7	4.3863	1.99346	0.0485151
DIO1	7.96585	1.99201	0.0107997
AC084117.3	6.79618	1.97784	0.0166167
RP11-61A14.4	6.5429	1.93258	0.0185818
IL1RL1	70.422	1.92775	7.07188e-14
SPAG17	6.05754	1.92404	0.0304581
RPL7AP10	6.31091	1.89269	0.0299404
REG4	1090.74	1.88927	1.26239e-122
NGF	11.283	1.87098	0.00238242
RP1-32I10.10	4.88204	1.85501	0.0493034
AC005281.1	6.49312	1.85133	0.0236599
TNFSF10	11.2052	1.8496	0.00334383
SLC14A2	6.37324	1.83941	0.0466406
LINC00685	6.28935	1.8301	0.0272647
MIR133A1HG	8.34757	1.78997	0.0135738
LPPR4	6.35135	1.77892	0.0386045
WISP2	7.52077	1.77434	0.0241784
AC007099.1	7.59506	1.77258	0.0185858
XAF1	14.4343	1.73178	0.00160351
SLC34A3	7.64207	1.72878	0.0258663
RP11-211G23.2	10.2852	1.71648	0.00710564
ITGB4	13904.4	1.71423	3.17369e-80
TAS2R15P	5.79513	1.70711	0.0481053
COL3A1	17.9837	1.68185	0.00102445
MEI1	6.68034	1.67138	0.0436444
CTD-2561B21.5	10.7886	1.66302	0.0078987
HLA-V	28.3123	1.64114	2.05089e-05
LRFN5	7.0892	1.63025	0.0371639
CITF22-49D8.1	9.18375	1.62813	0.0149442
HIST1H3E	12.9221	1.62348	0.00773868
AC005540.3	7.99529	1.61662	0.0344943
DHRS9	56.7156	1.61644	3.34712e-09
RP11-157E21.1	10.2907	1.61627	0.013459
RP11-517C16.2	12.3467	1.61375	0.0082376
GPR78	25.1884	1.61151	7.77542e-05
RP11-1060J15.9	6.93299	1.60254	0.0364092
RP11-210N13.1	8.50938	1.5839	0.0290074
CCDC162P	7.37059	1.57474	0.0444906
LOXL4	15.1828	1.57469	0.00260706
PGAM1P5	50.8243	1.56768	6.78709e-08
ALS2CL	166.511	1.56205	2.79886e-22
RP11-415J8.5	8.60413	1.56135	0.0432757
RHCE	10.2144	1.561	0.0170202
CTA-276F8.1	7.9789	1.56005	0.0316854
RP11-551L14.4	12.3523	1.55388	0.00717501
CAPN8	75.3797	1.54253	2.69022e-10
UBA7	62.1621	1.53719	4.9087e-09
GBP2	138.975	1.53702	6.50504e-19
TRAF1	10.9545	1.53398	0.0145108
PDGFB	67.5925	1.53166	3.63049e-09
bP-2171C21.5	10.2428	1.52717	0.0186513
LIPH	63.6961	1.52507	1.18262e-07
AC073283.7	12.6815	1.51098	0.0094112
CP	25.4444	1.50648	0.000239705
AOX2P	8.5821	1.48345	0.0298678
MMP13	180.819	1.47211	4.02526e-19
IL33	8.45349	1.45743	0.035514
LUCAT1	33.188	1.45662	6.20717e-05
GIPR	23.4042	1.44933	0.0007368
RP11-361L15.5	19.3821	1.4463	0.00249199
PDCL3P4	7.80975	1.44166	0.0439293
FAM65B	51.7939	1.4364	6.85591e-07
SLC47A1	13.3655	1.42817	0.010518
RP11-93H12.4	13.8859	1.42713	0.00790321
RTL1	17.2131	1.4147	0.00412018
LINC00239	14.9817	1.4124	0.00658048
CA9	77.6167	1.40138	9.08942e-10
MAPK15	21.6416	1.39488	0.00173894
SPINK5	60.079	1.39264	3.26673e-07
C1orf228	9.13594	1.39141	0.04798
ACSL5	52.9739	1.39079	1.788e-06
RP11-338K17.6	19.0765	1.38525	0.00458283
LINC00893	13.7423	1.38352	0.0102776
MSLN	8.59225	1.37945	0.0487989
EEF1A1P19	9.83389	1.37087	0.0298722
TSPAN8	1398.42	1.3655	2.95548e-114
RP3-525N10.2	8.55482	1.36051	0.0478455
RP11-794G24.1	11.7824	1.35642	0.0291332
RP11-120E11.2	10.5216	1.35495	0.0289638
HIST1H4H	43.2712	1.34881	1.0522e-05
LYPD3	228.382	1.3434	1.13248e-20
RP11-93G5.1	9.7795	1.33336	0.0480692
AC156455.1	23.6601	1.3259	0.00215775
AC000123.4	15.2027	1.32557	0.0127775
WISP1	20.0126	1.32481	0.00319454
C1orf162	14.4287	1.31329	0.0116879
NWD1	58.6833	1.30522	4.94753e-07
C1orf116	167.455	1.30456	1.40519e-15
CPA4	132.656	1.30147	2.25793e-13
UGT1A8	35.127	1.29953	0.000129652
HAP1	31.2715	1.29618	0.000292404
RP13-128O4.3	11.7822	1.28779	0.0255399
IFI27	100.44	1.28067	4.40846e-07
DDX18P1	10.6586	1.28034	0.0380253
C10orf54	73.9227	1.27689	3.96838e-08
RP11-66N24.3	13.0387	1.2694	0.0210971
DDX50P1	11.2551	1.26869	0.0328424
MVP	488.897	1.26414	1.15765e-34
RP11-323P17.2	32.6983	1.24671	0.000427144
GPLD1	12.6161	1.24429	0.0300952
RP11-122C5.3	20.1517	1.2432	0.00522531
CTD-2083E4.5	17.9659	1.23836	0.00868741
SLFNL1	113.954	1.23806	1.23263e-10
IFI44L	131.974	1.23735	5.11721e-08
CYP2E1	24.1453	1.22961	0.00423516
GOLGA8R	11.0078	1.22784	0.0414791
UNC13D	31.1368	1.22517	0.00051436
SLPI	354.32	1.22139	3.01858e-28
RARRES3	30.0856	1.22015	0.00124663
CXCR6	14.6055	1.21716	0.0237802
HCN2	22.3938	1.21613	0.00331752
RAB11FIP1P1	24.8379	1.21586	0.00479319
TMEM40	21.4107	1.21519	0.00700077
CTD-2349P21.3	13.5403	1.21362	0.0241219
HEPHL1	53.2136	1.21324	4.01805e-05
C1orf54	14.2199	1.21113	0.0348801
SLC22A1	21.042	1.20968	0.00471558
NNAT	48.4709	1.19726	0.00010576
FREM1	15.0592	1.19595	0.0282166
MYOM1	14.4084	1.19441	0.0261011
SCN9A	35.4082	1.19189	0.000438178
ATP2C2	25.5332	1.18882	0.00221362
RP11-429P3.8	17.3253	1.18733	0.015313
WNT9A	103.061	1.18358	2.53616e-09
CNKSR1	61.2555	1.17991	3.17123e-06
AC108676.1	21.6998	1.17901	0.00692602
C1orf105	13.59	1.1773	0.0362711
NLRC5	177.719	1.17704	3.77304e-14
TMEM27	21.5381	1.17703	0.0104874
HSH2D	12.8434	1.17547	0.0364315
CTB-47B11.3	20.8127	1.17517	0.00881651
PI3	384.662	1.1748	2.77755e-27
SYT13	16.2935	1.17291	0.0380411
CNTD1	17.6489	1.17034	0.0131862
TBC1D10C	13.4444	1.16968	0.0325183
SERPINI1	110.264	1.16906	8.06149e-10
APOL3	71.5633	1.16428	1.54994e-06
RP11-102K13.5	16.134	1.1612	0.0262991
GRIK2	24.6946	1.15979	0.00373313
DYSF	30.226	1.15813	0.00177559
NEK10	20.9903	1.15745	0.00809487
ABCB6	27.5538	1.15503	0.00381048
RP11-762H8.2	20.3982	1.15441	0.0122365
TSPEAR-AS1	74.9491	1.15144	6.39316e-07
MFSD4	12.2016	1.14618	0.0491748
CLDN1	146.261	1.14502	4.40444e-12
PLAT	2284.48	1.14407	8.68796e-105
HSPD1P11	12.6192	1.14142	0.0382158
LRRC66	14.5305	1.13568	0.0282891
RP11-78C3.1	13.4744	1.13497	0.0425813
PDLIM2	37.1268	1.13403	0.000449045
AC073130.3	12.6836	1.13286	0.0381098
WASH2P	23.4969	1.13016	0.00589346
MALAT1	11847	1.13001	3.23179e-18
PIP5KL1	22.04	1.12626	0.00839057
CUBN	16.4369	1.12405	0.0208726
RP11-1029J19.4	12.7387	1.12325	0.04806
C16orf71	15.0622	1.11811	0.0321855
RP11-235E17.6	13.4623	1.11801	0.045011
SH2D6	14.5465	1.11597	0.0323588
SLAMF9	31.6361	1.11347	0.00134268
SEMA3B	240.047	1.11259	1.58611e-16
RP11-29G8.3	16.8531	1.10925	0.0222577
ZDHHC11B	28.7449	1.10744	0.00288559
SLC37A2	141.524	1.10431	3.82011e-11
FER1L4	163.652	1.10154	9.32343e-11
RP11-45A17.4	20.5049	1.10022	0.0166686
PPFIA4	50.7995	1.09972	0.000141551
BTBD19	77.3485	1.09639	1.43322e-06
HIST2H2BF	21.6096	1.09464	0.0101647
DNAH1	168.298	1.09356	3.66702e-12
ARR3	15.1547	1.09108	0.0303221
MISP	372.694	1.09039	2.08232e-21
PTPRR	29.8209	1.08736	0.00235042
RP11-362K14.5	21.5002	1.08653	0.0123592
CYSRT1	16.4432	1.08605	0.0305622
RPL9P29	17.8364	1.08532	0.0312939
LINC00589	24.1303	1.08385	0.0104578
ZNF284	28.102	1.08232	0.00536468
MST1R	1156.93	1.0581	6.11249e-47
RAB11B-AS1	15.4224	1.05798	0.0337707
TMEM108-AS1	102.215	1.05697	8.11205e-08
NDST2	33.2915	1.05392	0.00249985
TEK	14.0646	1.0531	0.048609
TGFBI	19.3744	1.05234	0.0185448
NLRP3	76.1188	1.05077	4.28225e-06
RP4-760C5.3	15.535	1.04928	0.038962
DARS-AS1	66.8141	1.04648	1.66172e-05
CEACAM5	22.4669	1.04639	0.0126109
NTS	36.7687	1.04455	0.00122745
TSPAN11	19.024	1.04272	0.0206454
GS1-124K5.10	20.6628	1.04177	0.0161777
AC083884.8	21.9876	1.0404	0.013405
ARL14	42.8979	1.03779	0.000940869
CARD14	15.9269	1.03715	0.0475679
NFKBID	40.7379	1.03479	0.000775668
MYO15B	847.959	1.0334	3.94907e-46
IDUA	118.589	1.03079	6.2476e-08
AQP3	21.366	1.03015	0.019709
RP11-861E21.2	19.0246	1.02893	0.025768
GJB3	290.146	1.02872	1.07203e-17
LINC00161	21.4907	1.02419	0.0165219
SERPINB7	344.125	1.02084	2.08377e-20
RP11-573D15.9	22.0031	1.01824	0.0158719
GPR115	71.3049	1.01363	1.53216e-05
HSD17B7P2	25.062	1.01324	0.00926479
SAMD9L	213.733	1.01178	5.09805e-13
BLID	24.3178	1.00925	0.0115072
GSN-AS1	27.7266	1.00463	0.00736066
RP11-872J21.5	21.4423	1.00075	0.019796
GUCY1B2	21.2598	1.0001	0.0206881
RP11-433P17.2	25.3579	1.00001	0.00944411
HIST1H2BK	299.601	0.996201	1.72586e-17
RP11-334C17.5	84.7606	0.994329	7.83118e-06
KB-1836B5.1	15.9132	0.99203	0.0415032
TGM2	387.595	0.988954	3.64856e-20
DNAH12	21.3954	0.988768	0.0256846
CTD-2537I9.12	62.0448	0.985205	0.000345056
ZNF547	42.2649	0.984717	0.00117551
SERPINB1	902.071	0.984454	3.3785e-38
PGAM1P7	34.1844	0.983987	0.00369504
RP1-140K8.5	209.02	0.981839	2.90604e-12
LINC00326	43.6276	0.9818	0.000864296
ARID3A	95.8754	0.981556	1.78912e-06
ACE	29.9082	0.981082	0.00760897
SPDYA	15.5103	0.980129	0.0461268
TSPAN1	196.506	0.978664	8.04768e-12
SPIN2A	23.1116	0.976217	0.0158549
C21orf90	98.5489	0.966576	2.68533e-06
ZFP36	58.5619	0.966534	0.000179824
LTBP3	2541.11	0.966471	3.512e-78
PSMB9	68.4274	0.965827	4.85488e-05
AFAP1-AS1	17.5079	0.962709	0.0469494
RP11-452L6.5	36.0838	0.962685	0.0057433
LINC01504	17.9634	0.962058	0.0361854
CTB-109A12.1	24.674	0.960382	0.0206338
ID1	1497.77	0.960243	1.48771e-57
GPR116	29.3049	0.958738	0.00917922
RP11-480A16.1	57.2791	0.957197	0.000298709
TNXB	5620	0.956186	5.97687e-24
TMEM184A	617.256	0.954452	8.66306e-27
TAS1R3	51.8367	0.947335	0.000934905
TDRD6	27.5154	0.936886	0.0130062
AC006116.20	30.8815	0.933419	0.00933915
STAT4	40.8017	0.933387	0.00209755
CCDC65	20.8189	0.931195	0.0327112
PAPLN	137.766	0.930325	9.06269e-08
TTYH1	19.0472	0.928298	0.0362008
HIST2H2BE	195.729	0.928137	9.26496e-11
LINC00663	23.9113	0.926187	0.0199159
SIDT1	1159.44	0.926165	1.24975e-45
KRT87P	167.34	0.923665	2.50184e-08
HIST1H2BC	76.6709	0.920866	4.17103e-05
VAC14-AS1	20.6522	0.919171	0.0334833
HIST1H2AC	355.278	0.918247	6.10019e-15
MX2	36.3483	0.917977	0.00924857
AC139100.4	19.886	0.916784	0.0438306
CTC-459F4.1	33.0574	0.913941	0.0082132
TACR2	22.1012	0.913804	0.0268593
B3GALT5	512.106	0.913412	3.26631e-20
ACPP	70.0398	0.912945	0.000158962
SPOCK2	23.0754	0.91217	0.0264179
ITGB2	61.0671	0.911202	0.00143115
SH3GL1P1	32.3555	0.908582	0.0156982
TGM1	22.2738	0.907781	0.0273268
RP11-336A10.5	29.5284	0.90672	0.0115711
RP3-368A4.6	187.328	0.904914	5.5452e-09
C4orf47	17.9802	0.90408	0.0466504
COL21A1	28.7977	0.9039	0.0130762
SELPLG	94.2648	0.903076	4.45165e-05
LGALS3BP	3923.56	0.901299	8.80423e-92
THBS1	770.848	0.900051	4.02542e-30
BMP3	32.0778	0.899972	0.01355
MIR22HG	242.043	0.899374	1.49608e-12
CFAP44	457.399	0.897915	2.62193e-20
TM4SF19	27.7973	0.895853	0.0155399
IFITM1	77.1105	0.89453	0.000469266
SMAD9	76.8847	0.894043	0.000147762
HSPG2	10559.6	0.891445	2.49722e-16
SYNGR4	31.1548	0.888494	0.0123256
MIR4534	53.7836	0.887368	0.00113072
RP1-63G5.5	23.719	0.887252	0.0307362
SLC2A12	45.1846	0.886288	0.00235844
CYP2J2	36.3765	0.885605	0.00577722
RP13-104F24.3	22.7925	0.883191	0.0333195
B3GNT3	485.504	0.88235	4.27105e-20
POLN	34.4967	0.880824	0.0129129
ZNF554	41.8187	0.879422	0.00756647
CTC-425O23.5	60.7242	0.879344	0.000468173
CYP27C1	34.5108	0.877749	0.0161786
FGFBP1	1228.22	0.874786	2.77969e-40
TMEM86A	75.9512	0.87304	0.000104708
TMC5	120.039	0.871347	1.04495e-06
RP4-717I23.3	132.744	0.870269	1.34798e-06
GPRC5A	4168.31	0.867981	3.59474e-65
RP5-1185I7.1	31.8814	0.867511	0.0115895
MYL5	70.6692	0.866149	0.000222836
B3GNT4	27.5124	0.86388	0.022933
ACCS	111.658	0.862006	5.23867e-06
CES4A	91.884	0.86127	2.8725e-05
CSF3	34.6174	0.857854	0.0104959
EPHA1	37.5808	0.857084	0.00939812
RP11-445F12.2	25.7988	0.855842	0.0274219
GOLGA8A	653.338	0.853188	9.55646e-21
TAP1	532.23	0.852178	8.37039e-17
LINC00843	36.7788	0.850402	0.00928251
RP11-93B14.10	32.2435	0.849287	0.0138687
PDGFA	49.2929	0.847754	0.00234024
WFDC3	183.145	0.84663	1.24962e-08
CFB	28.4374	0.845639	0.0261713
ACAP1	32.8797	0.844502	0.0227053
IGFBP6	760.351	0.84362	7.07122e-20
HIST1H4I	132.863	0.841287	3.906e-06
RP11-174G6.5	50.7512	0.841202	0.00204211
PLXNA3	822.453	0.84083	6.20536e-29
MUC5B	87840.2	0.840423	1.46603e-69
TIMP1	4574.22	0.837626	2.60907e-64
PLEKHM1P	287.066	0.836828	3.25777e-12
RP4-798A10.2	33.5682	0.836804	0.0137979
AGPAT4	906.97	0.835751	7.95385e-33
RP11-11N7.5	29.6448	0.834569	0.0207108
HIST1H2BD	113.243	0.834381	2.02853e-05
HERC2P2	412.389	0.832501	2.30422e-13
TTC3P1	40.4149	0.831068	0.00759117
ENTPD2	73.9545	0.82963	0.000330584
PLA2G6	95.7287	0.827775	4.73439e-05
RP11-434I12.2	22.0035	0.827343	0.0449196
LINC01355	83.5191	0.824335	0.000134593
RP11-24F11.2	70.4941	0.823736	0.00048696
SPAG4	178.134	0.821157	4.19591e-07
CDH3	836.103	0.818282	2.78803e-28
MR1	59.6797	0.81717	0.00184811
AC009120.6	47.3425	0.816619	0.00721719
MXRA8	183.831	0.816361	6.07292e-08
ELF3	371.581	0.815955	1.57891e-13
ZNF224	68.6958	0.815126	0.000608168
RP11-93B14.9	84.9221	0.813798	0.000268689
GALNT3	150.299	0.813232	1.3741e-06
IL37	89.3681	0.812921	0.000101508
CLU	2420.57	0.812136	8.16671e-59
FA2H	43.3174	0.81097	0.0159439
RP11-1H8.5	25.3658	0.810385	0.0382701
PDZK1	26.0177	0.808938	0.0350641
RASA4CP	26.732	0.80884	0.0340309
LINC00894	54.4182	0.807646	0.0054665
CLK1	1225.42	0.807633	1.32505e-08
GAS6-AS1	95.1739	0.805942	7.04695e-05
ADAM8	59.4097	0.805828	0.00207354
SCUBE3	115.144	0.805257	1.88832e-05
FIRRE	31.392	0.800968	0.0263973
MT-RNR2	77920.9	0.798435	2.4839e-18
RP11-66B24.4	275.68	0.796466	5.23709e-11
TTC18	102.831	0.795668	3.41494e-05
NPHP3	72.9606	0.795133	0.000928346
RHBDF1	513.267	0.793974	1.22532e-16
SLC45A1	83.6694	0.793088	0.000308984
SELENBP1	734.696	0.792118	8.56974e-25
HID1	176.71	0.791195	5.77122e-07
MTMR9LP	104.496	0.789131	7.70847e-05
MUC5AC	1421.41	0.787138	2.28648e-24
SYTL1	161.256	0.782677	1.12013e-05
CTD-3252C9.4	227.041	0.781715	4.99188e-09
RP11-894P9.1	161.105	0.7801	9.55128e-07
GRB7	38.7308	0.778577	0.019655
APBB3	201.891	0.775724	3.953e-08
RP11-488L18.10	47.6611	0.77357	0.00926889
C15orf52	1358.43	0.772177	3.37183e-37
SPTBN5	37.0484	0.772097	0.0213486
IGIP	70.512	0.770882	0.000838627
TFF2	280.45	0.77052	1.06125e-08
RNF207	389.894	0.770482	4.35807e-12
MAPK8IP3	845.361	0.769929	4.27738e-27
CCDC141	66.4716	0.769766	0.00114512
JUNB	460.777	0.769177	2.39541e-14
SERPINA1	381.32	0.76732	4.70883e-13
GALC	91.2425	0.766618	0.000181547
PCDH1	546.148	0.76448	5.8098e-18
CH17-340M24.3	44.4563	0.764294	0.0106756
DKK1	4640.25	0.763765	1.73807e-48
NABP1	1660.73	0.762835	9.71141e-35
MSTO2P	86.4821	0.762285	0.000434747
CREB3L1	1140.85	0.762252	2.49491e-22
ZNF583	29.1905	0.760724	0.0415866
CYTH4	103.789	0.753038	0.000113272
MUC1	44.9826	0.751507	0.0101307
SCART1	69.9641	0.750247	0.00145065
WNT7A	630.104	0.749149	1.57433e-18
HYPK	28.7849	0.745332	0.0384863
MKX	28.4952	0.74498	0.0441286
STC1	440.913	0.742561	1.07241e-14
FTX	92.4486	0.742392	0.000735597
BRSK1	74.6802	0.74118	0.0058424
JUP	1228.82	0.740301	1.12496e-24
ADAMTS7	74.5634	0.739636	0.00110844
AC006273.5	68.0826	0.739473	0.00166221
ANO9	53.9616	0.738859	0.00584134
C10orf10	87.7333	0.738423	0.000398406
HS3ST1	36.4783	0.730388	0.0244619
IGF2	104.884	0.730283	0.00039419
TAGLN	28.703	0.730121	0.0496485
RP11-257O5.2	151.316	0.72544	3.31598e-05
RSRP1	484.068	0.725149	5.41436e-15
CHST6	32.0514	0.724914	0.0379843
ZDHHC11	38.5063	0.724783	0.0252485
TNNI3	37.4181	0.724689	0.0217459
AC012613.2	51.8746	0.7232	0.0108797
RP11-158L12.4	48.9312	0.7225	0.0133573
L1CAM	109.184	0.721439	0.000139106
HSD3B7	48.45	0.719776	0.00986064
ERCC6	426.503	0.719417	8.66574e-13
TMEM45B	1841.38	0.719405	2.77282e-31
PLEKHH2	1176.9	0.718834	3.79713e-25
RP3-368A4.5	184.635	0.718822	6.38977e-06
AC009404.2	44.8031	0.718185	0.014601
SDR16C5	54.3068	0.717395	0.00885204
DDIT4	145.183	0.715694	1.07144e-05
SPARC	267.868	0.714973	1.23476e-06
GPR126	744.039	0.714239	1.35172e-16
FAM84A	345.117	0.713469	1.19119e-10
C1orf213	38.5399	0.713416	0.0300598
SLC25A45	179.727	0.713126	1.96116e-06
PNPLA7	91.9315	0.711831	0.00061343
SLC52A3	65.1249	0.710397	0.00367244
IL15RA	78.8175	0.708715	0.00155253
FAM167B	45.4183	0.706787	0.0132787
MYPN	44.6301	0.704278	0.0181131
SOX13	828.83	0.704072	2.20888e-17
MRPL53	38.9373	0.703551	0.0399829
CTSF	212.461	0.703525	5.19676e-07
APOL2	282.414	0.70311	5.15076e-09
LRRC71	48.1397	0.702327	0.0125795
PRAF2	41.2252	0.701618	0.0256659
SLC9A9	50.8664	0.700569	0.0264505
HR	919.589	0.699468	5.77373e-21
TNFAIP2	246.738	0.698492	7.41581e-08
ABCA1	607.598	0.698324	1.49618e-13
TSPAN10	58.69	0.695406	0.0120877
BDNF	55.9654	0.693809	0.00959703
RP11-495P10.1	39.7242	0.692785	0.0316875
LIN7A	46.9115	0.688443	0.0163703
TFF1	481.539	0.687061	5.95901e-13
SKIL	436.001	0.6857	1.01215e-11
CSMD2	1625.11	0.684622	6.0724e-35
CTSO	74.8033	0.683749	0.00583109
ANKRD29	597.814	0.68362	3.27451e-15
IFI6	312.951	0.683285	0.0124311
ALDH3B1	272.334	0.683222	1.50151e-08
RAPGEFL1	44.0015	0.681299	0.024088
C1orf94	97.6254	0.680937	0.000687998
SEC31B	77.3057	0.680007	0.00252167
MYO1F	76.1016	0.679735	0.00392445
MATN3	65.7267	0.679467	0.00509196
CXCL8	270.073	0.678867	8.242e-08
RRP7B	96.7117	0.678716	0.000635664
SLC22A18	115.718	0.678337	0.000167526
ANKZF1	573.771	0.67753	5.43299e-15
RETSAT	1337.23	0.676461	2.60429e-25
ANGPTL4	66.8667	0.675692	0.00423219
ZSWIM3	143.063	0.675484	0.000121005
MAGEH1	84.0449	0.674533	0.001461
CLK4	246.151	0.67403	1.05777e-07
MIRLET7BHG	154.621	0.673644	3.23033e-05
RP11-677M14.3	40.5464	0.67255	0.0283963
BTN3A3	146.844	0.672311	5.90312e-05
TMC6	81.0729	0.672242	0.00253493
ABCA2	1208.35	0.670389	4.88755e-21
SCARA5	413.802	0.669009	7.23506e-11
TMEM17	42.9768	0.668553	0.0245191
TMC4	42.1425	0.668466	0.0286828
AP1G2	314.307	0.668247	6.93282e-09
CHPF2	1263.51	0.667695	2.69449e-26
CCDC78	54.2776	0.667008	0.0137673
CLCN4	698.937	0.666942	2.34763e-15
SLC2A1	1525.97	0.666629	4.79101e-31
AP000347.2	34.0772	0.666604	0.0471371
BCL3	231.242	0.665483	5.11897e-06
RP1-151F17.2	81.2689	0.664886	0.00241911
SGSH	759.051	0.664031	3.3272e-17
CSPG4P8	48.9757	0.66371	0.0174463
C1QTNF6	46.2567	0.663573	0.0276604
PDXDC2P	43.9314	0.663303	0.0227958
LL22NC03-2H8.5	45.3321	0.662233	0.0243621
HSF4	91.0218	0.661992	0.00110077
PILRB	143.291	0.661593	6.85628e-05
KDELR3	446.972	0.661414	1.12919e-11
OVGP1	80.6071	0.660977	0.00225663
CYP1B1	998.009	0.660912	7.91775e-23
RP11-818F20.5	79.6591	0.660167	0.00259573
APOBEC3G	46.4049	0.659272	0.0219585
CCNL2	2497.75	0.65923	4.22577e-44
ZNF566	88.2557	0.659199	0.00232568
PPM1K	249.179	0.658649	2.90165e-07
ADM	258.562	0.658592	1.76612e-07
IRF1	382.896	0.65802	7.70826e-10
RP11-110I1.11	48.8524	0.657618	0.0291006
RP11-274B21.4	111.117	0.65724	0.000835955
VSTM2L	408.055	0.656822	8.9516e-10
MMP1	390.124	0.656206	8.44998e-10
TH	382.895	0.65413	9.24878e-09
FLJ42351	88.5385	0.653911	0.00145253
ZC3H12A	147.574	0.652933	6.43498e-05
TNFRSF25	289.543	0.652296	5.53668e-08
ZNF841	448.129	0.650739	1.97338e-08
CSAD	198.904	0.649425	3.09772e-06
ARAP2	52.4197	0.649331	0.0167253
SLC1A1	136.927	0.647954	0.000127845
HLA-B	477.57	0.646839	9.55573e-10
STK36	403.498	0.646635	2.75186e-10
PABPC1L	635.049	0.646443	7.24559e-14
PIWIL1	491.911	0.646229	1.35057e-12
TMEM45A	588.927	0.644817	4.23617e-14
C5orf45	192.821	0.644529	8.59519e-06
ABCC3	2022.42	0.643266	2.27796e-26
GLDN	58.3245	0.642778	0.0177938
CBWD3	58.1998	0.641483	0.0120377
SCIN	171.206	0.640579	2.97762e-05
NIPAL2	75.1029	0.639384	0.00490665
LINC00342	1547.83	0.639118	1.84548e-25
VASN	168.253	0.639022	3.90322e-05
FBXO48	63.6074	0.639014	0.00930836
SLC2A10	48.5701	0.638764	0.0316522
ABCA7	215.233	0.638236	2.90051e-06
RP11-191L9.4	37.3106	0.637104	0.0473729
CTD-2583A14.11	48.4792	0.636895	0.0226063
LAMB2	2308.04	0.636105	1.89278e-38
CD55	11278.9	0.635938	2.79754e-63
PEAR1	1086.82	0.635733	4.3516e-22
FAM83H-AS1	59.7527	0.634812	0.0182491
TLR4	71.3886	0.634744	0.00881949
MYH3	59.7002	0.6343	0.0162731
FSTL3	331.416	0.633816	1.87555e-08
PWAR5	79.9198	0.633354	0.0042047
RAB26	47.9652	0.631107	0.027811
AMT	42.691	0.630847	0.0402978
FAM214B	540.012	0.630642	9.69413e-12
KRT81	6403.37	0.630334	8.58621e-33
LMF1	320.649	0.62915	9.11392e-08
SH3TC2	959.32	0.628842	2.12414e-16
LINC01179	47.7486	0.627615	0.0286265
ZNF692	572.465	0.625973	5.74712e-13
TMCC1-AS1	82.7143	0.625676	0.00385998
GALT	119.727	0.625443	0.000935822
RP11-574K11.29	48.8944	0.625098	0.0381247
CCDC159	178.785	0.624824	4.2002e-05
CPED1	42.0792	0.623942	0.0366541
VWDE	151.507	0.623502	0.000180811
TRIM46	72.7792	0.622675	0.00880183
RP11-800A3.4	658.48	0.62042	2.41973e-12
MBL1P	84.3113	0.619605	0.0055874
RP11-344N10.5	55.8074	0.619222	0.0231296
CCDC88B	77.5764	0.619199	0.0063097
RP5-965G21.4	188.355	0.618866	3.67305e-05
CYTH2	45.8414	0.618312	0.0305104
ENO3	61.4229	0.618138	0.0136045
LAMB3	2241.81	0.61723	7.34787e-28
FO538757.2	42.0067	0.616768	0.04072
ARSA	223.911	0.616347	3.29633e-06
TMEM63A	905.382	0.615955	1.33126e-17
GPR37	147.298	0.614289	0.000148214
ANKRD24	51.7	0.612765	0.026894
GAD1	89.0792	0.612607	0.00569069
SLC26A11	229.468	0.612353	2.06158e-06
OAS2	342.329	0.612349	8.41363e-07
MAN2C1	421.199	0.612139	6.78483e-10
MUC2	84.7056	0.611557	0.00517681
PRPH	55.5248	0.610717	0.020118
TMEM173	553.301	0.610622	3.75762e-12
EID3	47.1884	0.610212	0.0404667
GOLGA8B	276.978	0.610149	2.23426e-06
TNS4	3657.9	0.609389	2.87233e-40
FAM227A	93.9783	0.608749	0.00254324
SERTAD3	177.829	0.608187	0.000313015
TMEM39A	797.476	0.607833	9.69111e-17
CTD-2574D22.3	54.1728	0.60764	0.0227959
AGR2	5356.17	0.606977	1.68161e-30
PKHD1	128.684	0.606559	0.00173545
SCEL	352.33	0.606346	2.67648e-06
ADAMTS13	57.4986	0.606283	0.019949
SLITRK6	156.609	0.604667	0.000589526
SYTL2	759.292	0.604363	4.37167e-15
SLC26A6	447.394	0.604281	2.86079e-10
SEMA4C	521.449	0.603721	8.97898e-12
INHBB	1170.27	0.603418	1.26005e-13
USPL1	177.106	0.601707	0.000178636
FMN1	94.5141	0.601213	0.00345477
DOC2A	90.7322	0.600225	0.00456002
OSBPL7	379.034	0.600044	2.69812e-08
LINC01468	1167.39	0.598548	2.23578e-21
STYK1	45.4923	0.598364	0.0360836
SDSL	66.9299	0.59765	0.0113941
SLC22A5	308.223	0.597554	3.70396e-06
SERPINE2	2600.27	0.596561	3.12625e-33
IRF9	706.707	0.596535	3.46935e-12
DSC2	2304.99	0.595313	2.16591e-32
GBP3	534.833	0.594481	1.65235e-11
C14orf37	333.692	0.593782	1.84372e-07
STARD7-AS1	72.2694	0.593756	0.00904779
RPL32P3	170.453	0.592491	0.000308501
CEMIP	802.011	0.590886	1.30434e-15
COL7A1	113.841	0.590713	0.00119665
RP11-32B5.1	115.331	0.59041	0.000970885
RP11-504P24.8	71.0851	0.588287	0.0146663
KCNK9	95.3141	0.587941	0.00284279
GPR157	247.581	0.587609	6.38091e-06
SOD3	445.85	0.586866	1.76442e-09
ESAM	135.86	0.586409	0.00089274
PRSS35	418.087	0.585427	2.12255e-09
PLD1	637.184	0.585141	1.5448e-10
DNAH2	47.6728	0.584452	0.0358465
PARP9	1084.35	0.584275	8.65414e-15
NLRP1	43.5976	0.58274	0.0448459
SERPINB5	2444.38	0.582268	1.21914e-30
SH3TC1	284.464	0.581924	2.15101e-06
DNAH7	81.6552	0.581743	0.0064681
EME2	112.027	0.58021	0.00240427
SEPT7P9	148.897	0.580144	0.000873272
CPT1C	349.655	0.578327	4.83379e-08
PSORS1C1	64.3916	0.577599	0.0193492
ABCA13	280.047	0.577524	3.4462e-06
MT-RNR1	22850.1	0.576296	1.65513e-08
GS1-124K5.11	231.44	0.575611	4.86777e-05
AHNAK2	12130	0.575007	3.90175e-38
GABRB3	141.489	0.57443	0.000516219
NPDC1	383.632	0.57442	7.02717e-08
DDX60L	233.74	0.572994	7.70908e-06
IL7R	76.6473	0.572615	0.00923462
TTLL3	149.988	0.572594	0.000763496
SDHAP1	128.493	0.572473	0.00103853
PHYKPL	460.54	0.572403	4.85289e-09
GPRC5C	1011.27	0.57232	5.76015e-17
SIDT2	401.625	0.572181	3.81697e-08
GPRASP1	77.5358	0.572097	0.0150365
ZNF337-AS1	100.259	0.571324	0.00334855
CEACAM1	58.0618	0.57127	0.0240949
CAPRIN2	1182.75	0.571192	5.98346e-13
TTN	434.552	0.570091	8.52316e-08
PIGG	1162.82	0.569674	2.49581e-18
ABCC10	413.389	0.56966	1.0729e-08
GPR110	3889.22	0.568452	1.5848e-28
CD160	62.6294	0.568344	0.0244402
CAPG	1220.92	0.567791	2.47945e-18
ZNF112	58.1035	0.56741	0.0307729
FICD	256.817	0.567315	3.62426e-06
SLC9A5	66.2933	0.566905	0.0160536
EPHA7	101.729	0.566817	0.00293992
GPR155	175.516	0.5649	0.000765544
LGALS3	2314.83	0.564731	6.66834e-28
CTD-2017D11.1	62.724	0.564385	0.0362919
SHC4	298.108	0.563803	3.33247e-06
TMX4	2551.07	0.562484	3.71597e-27
MAP3K14	304.553	0.562088	8.81904e-07
ACSF2	493.028	0.56189	1.05499e-09
LRP1	3285.9	0.56166	1.95282e-22
RP11-757F18.5	53.6175	0.560643	0.0359579
NPTXR	194.686	0.560135	6.22891e-05
TBC1D19	199.983	0.560131	6.48821e-05
FAM20A	444.751	0.559852	2.68945e-08
SLC46A3	82.4494	0.55957	0.0141381
RP11-104N10.2	95.3342	0.559432	0.00911053
CD9	2368.34	0.559021	2.99695e-20
HOXB3	53.992	0.558843	0.0369951
PLXNB3	331.844	0.557716	3.82887e-07
PLK3	171.063	0.557286	0.000442011
PRR7-AS1	81.2381	0.556838	0.0131806
MZF1	344.398	0.55654	4.04357e-07
AHSA2	393.892	0.555314	4.09575e-08
HIST1H1C	264.528	0.555266	1.8824e-05
MTX1P1	51.9473	0.554174	0.040039
BMF	127.029	0.554134	0.00216014
C1QTNF1	1345.25	0.552973	5.49633e-17
MIR3916	551.807	0.552631	3.93839e-10
C1orf85	390.024	0.552605	7.35246e-08
ITGA2	3056.77	0.551656	1.82987e-35
KCNN4	758.044	0.551436	6.2167e-12
ROM1	65.5988	0.550989	0.0233148
OGT	6990.65	0.550857	2.82391e-32
ONECUT3	2134.14	0.550712	1.9798e-24
KIAA1919	138.228	0.550297	0.000840683
VSTM5	337.53	0.550271	6.5161e-07
FAM86HP	58.1697	0.550075	0.0311068
ULBP2	126.244	0.549995	0.0016066
C3orf52	178.594	0.549182	0.000241729
CLUHP3	131.493	0.549029	0.00252542
HERC2P9	121.407	0.548714	0.00295372
EFNA1	264.167	0.547904	8.72399e-06
ZNF10	91.4327	0.547827	0.00707753
NADSYN1	942.728	0.546831	1.70224e-14
PLEC	61560.1	0.546362	6.09727e-45
HLX	155.472	0.546159	0.00104436
DDR1	984.346	0.545918	2.39773e-11
TFAP2C	391.017	0.54509	2.04134e-06
DHRS1	378.7	0.543938	2.04811e-07
ATP8B1	309.83	0.543677	1.42456e-06
RAD51-AS1	84.1424	0.543407	0.0104603
TP53TG1	59.8495	0.542867	0.0327714
CLCF1	322.479	0.542136	3.59553e-06
EPHX2	204.945	0.541397	0.000145467
ZNF239	70.5601	0.541284	0.0239213
ZNF200	141.599	0.541031	0.00106477
TMEM2	511.906	0.539046	2.85528e-09
SLC19A2	240.259	0.538104	3.82606e-05
HBEGF	173.459	0.537701	0.000353641
RP11-196G18.22	190.471	0.53704	0.000211754
ENG	140.954	0.536618	0.000999863
LRP5L	106.276	0.536595	0.00653222
PLEKHG5	1712.69	0.536422	3.57261e-19
DENND3	1431.44	0.535373	2.26475e-20
SLC4A11	368.871	0.535308	4.38709e-07
TMEM150A	160.194	0.535124	0.000833447
TMEM198B	135.226	0.534922	0.00355349
SLC2A11	171.692	0.534901	0.000392736
LENG8-AS1	74.8635	0.534845	0.0153103
CAPS	153.987	0.534715	0.000617774
CTC-444N24.7	83.3235	0.534244	0.0210179
SLC25A27	94.6731	0.533834	0.0252606
EPS8L2	649.407	0.533821	1.50816e-10
SNHG12	159.724	0.53365	0.000677624
ZNF140	66.9455	0.533554	0.0227839
LINC01269	55.1733	0.533103	0.0469915
SLC5A3	1940.65	0.533016	1.86596e-23
SLC9A2	164.076	0.53284	0.000525275
IFI35	172.111	0.532433	0.000708315
GPR135	396.491	0.532324	2.04198e-06
PPP2R5B	355.814	0.532303	1.10872e-06
UNC13A	67.5103	0.532163	0.0242316
CDA	779.674	0.532079	3.07833e-11
CLDND1	956.377	0.531554	2.24839e-12
GSN	1571.92	0.531232	9.80726e-17
EDNRA	71.5328	0.53117	0.0261359
ITGA5	1552.67	0.531158	9.49033e-18
MMP24	68.9534	0.530689	0.0239136
NEAT1	3135.69	0.53041	4.58624e-17
TERT	136.531	0.529856	0.00162382
TTC14	642.802	0.528435	7.38337e-10
THBS3	151.807	0.528289	0.00261822
MST1	71.5057	0.528061	0.0321408
CTD-2562J17.6	94.7899	0.527986	0.00770839
TUBA1A	3332.08	0.526925	2.69767e-21
PSEN2	545.527	0.52683	1.05234e-09
PLAC4	88.9347	0.526754	0.013589
PTGFR	427.555	0.526582	2.30255e-07
RP11-677M14.7	93.6086	0.52643	0.0140146
ICAM1	683.009	0.525983	4.77644e-11
C5	568.551	0.525801	4.49392e-09
RP11-45M22.2	275.82	0.525768	1.89822e-05
CPEB2	285.588	0.524965	2.23188e-05
DICER1-AS1	60.6492	0.524401	0.0339581
LINC00969	329.946	0.524279	4.04705e-06
PON2	1189.04	0.523959	6.65362e-16
S100A3	87.4795	0.522678	0.0220354
LINC01059	75.9784	0.522222	0.0244165
ST6GAL2	413.741	0.521867	2.54157e-07
AC005077.12	156.038	0.521751	0.00120356
DNAJB9	167.19	0.52153	0.000667503
PIGZ	86.6244	0.521221	0.0179425
TXNRD2	290.605	0.520136	8.90108e-06
LINC00205	145.392	0.519779	0.00116236
ZNF823	88.5713	0.519721	0.0125891
RP11-366L20.2	370.552	0.519672	2.6042e-05
CSPG5	74.8991	0.518487	0.0246876
BOC	123.987	0.518331	0.00513266
AC093818.1	53.9633	0.51747	0.049799
PTPRH	559.101	0.517136	5.78246e-09
LINC00824	139.353	0.516825	0.00544935
PARP14	1441.68	0.515495	6.29642e-16
ZNF169	111.304	0.514125	0.00591389
BNIP3	2145.48	0.513721	6.73547e-21
HERC6	141.072	0.513278	0.0022838
MEIS1	73.2859	0.512604	0.0249105
RP11-540B6.6	129.004	0.512399	0.00547934
DNAH5	386.711	0.512315	6.43452e-07
DYNLT3	2269.79	0.512144	1.03732e-21
MIDN	1014.06	0.511915	2.24478e-10
NTN4	5946.27	0.511798	5.37832e-34
DNAH11	81.059	0.511734	0.0195031
PARP10	439.615	0.510177	6.18322e-07
AGAP6	310.666	0.510176	6.80978e-06
SEPW1	438.822	0.510019	2.6657e-07
SLC26A1	86.9124	0.509716	0.0129096
TPCN1	2048.85	0.509638	6.28793e-19
RAMP1	908.753	0.50882	4.45803e-12
LPAR3	686.723	0.508744	3.36519e-10
KCNJ6	1696.38	0.508561	4.51378e-19
TMEM63B	769.768	0.508542	9.10199e-10
RBM5	1338.84	0.507326	7.66482e-16
LPCAT1	4115.58	0.507095	1.08391e-35
ULBP1	61.5962	0.506834	0.0482145
CHD5	61.7643	0.5065	0.0383672
LENG8	2527.42	0.506024	1.8671e-20
ARHGAP27	589.873	0.50575	2.90294e-09
RNF103	208.938	0.505734	0.000187624
SLC12A9	831.32	0.505412	2.74091e-10
ANKHD1	56.1849	0.504957	0.0487286
HLA-E	1783.65	0.504878	6.35639e-15
AREG	505.261	0.504457	5.27834e-08
ST6GALNAC2	187.074	0.503637	0.000713999
CARD8	161.638	0.503439	0.000913228
QRICH2	92.5055	0.503371	0.0131816
DNAJC12	467.218	0.502846	1.04136e-07
MRPL45P2	74.3948	0.50255	0.0318209
PLAGL1	167.081	0.50217	0.00115721
AC005154.6	361.802	0.501323	2.36565e-06
PPP1R26-AS1	181.495	0.501151	0.000750373
P4HA1	3879.91	0.500618	5.03087e-33
JAG1	3783.13	0.498736	9.23989e-31
C2orf42	175.248	0.498636	0.000946254
CASP10	87.9634	0.498291	0.0176378
LEPREL1	148.444	0.498097	0.00200733
SH2D2A	210.337	0.497721	0.000363675
TRIM21	169.836	0.497718	0.00146666
SELM	88.7667	0.496691	0.0171223
STAC	70.6983	0.496378	0.0368132
LGR5	119.62	0.496343	0.00655301
EMC3	1472.5	0.496307	1.90411e-18
PFKFB4	698.918	0.495654	8.91187e-10
DNTTIP1	3925.31	0.495406	1.99157e-28
HAS2	317.819	0.495168	1.81176e-05
MIR210HG	150.04	0.494786	0.00202107
CTSH	200.026	0.494714	0.000392791
PCSK7	744.641	0.494624	2.09392e-10
ATP13A1	2693.11	0.494232	1.31393e-21
ADCK4	148.123	0.49378	0.00215354
C7orf43	259.265	0.493677	5.43202e-05
PLBD2	2915.78	0.493467	2.63477e-22
ZBTB49	88.0636	0.493456	0.0237787
UTS2B	158.644	0.493135	0.00157795
P2RY2	835.254	0.49294	4.54135e-12
IL4R	274.332	0.492896	4.08458e-05
MYEOV	255.294	0.492874	7.41877e-05
TAF1D	1518.32	0.492664	8.73914e-14
SPICE1	601.437	0.492285	9.28701e-08
GGT7	88.1868	0.492003	0.02376
EFCAB13	80.1317	0.491744	0.0392965
FGF14	67.2945	0.491384	0.0445485
SCNN1B	247.143	0.49054	0.000308335
RP11-87H9.4	179.002	0.489752	0.00522214
FUT11	2144.3	0.488971	4.05161e-20
TMEM87A	653.11	0.488817	3.86229e-09
ACVR2A	148.777	0.488675	0.00307759
ITGB8	547.643	0.488304	5.40656e-07
ZNF2	179.154	0.487276	0.00124033
RCBTB2	115.478	0.48699	0.00628554
CRISPLD1	139.683	0.486807	0.00400871
NID2	325.323	0.48655	1.87021e-05
ZNF276	351.391	0.486162	3.96449e-06
TENC1	476.622	0.485674	1.51636e-06
DGKA	591.833	0.484749	2.56503e-08
FLNB	19672.8	0.484611	4.29199e-54
ZBTB34	162.138	0.484605	0.00460427
RP11-274B21.2	221.189	0.48458	0.000667797
PGBD2	124.76	0.484091	0.00718978
ARSD	368.542	0.483616	1.24299e-05
C6orf132	78.5612	0.483574	0.0277965
KCNMB4	486.179	0.483561	2.98473e-06
STC2	3146.26	0.483129	5.73951e-26
RP11-73M18.8	179.478	0.482559	0.00125743
KIAA0907	1257.13	0.482348	7.61987e-15
MICAL1	285.273	0.481181	7.2146e-05
SPATA7	212.499	0.480862	0.000597345
CSRNP1	176.703	0.480828	0.00195017
LIF	1437.43	0.480416	2.72162e-14
STAT2	1005.67	0.480096	4.40782e-11
SIL1	93.3156	0.480002	0.0176678
RBM20	280.579	0.479435	6.95255e-05
PTPN6	197.668	0.479116	0.00136102
VSIG1	222.421	0.478969	0.000468445
AK4	1092.14	0.478789	1.05556e-12
KCNQ1OT1	208.756	0.47833	0.00218421
ABCC5	944.152	0.478295	1.93145e-12
APOBEC3C	3074.63	0.47817	8.02828e-21
C9orf9	80.7321	0.476647	0.0381435
LPIN3	658.821	0.476193	4.47656e-08
CALHM2	128.252	0.47618	0.00497656
NBPF11	158.258	0.476109	0.00518859
EIF4A2	5117.35	0.47556	2.7812e-35
ZNF250	230.813	0.475527	0.000274311
LIPA	2039.19	0.475447	1.86624e-18
COL4A5	2531.89	0.474243	2.78003e-18
GNPTG	280.003	0.474158	5.60055e-05
IGFBP3	437.168	0.473912	1.94666e-06
LAMA3	2536.32	0.47385	2.99381e-20
ARMC9	472.346	0.472339	6.41893e-07
CLN8	476.852	0.472122	8.35578e-07
HLA-C	1418.23	0.471909	1.05145e-11
PUS10	72.5521	0.471478	0.0452119
TENM1	590.809	0.471361	1.37818e-07
ROBO4	347.882	0.471202	1.63629e-05
MLPH	2057.35	0.471043	1.2561e-19
HEMK1	588.957	0.47103	1.35617e-08
BANK1	74.0965	0.470278	0.0381791
SLC12A4	551.592	0.470203	1.55376e-07
TPT1-AS1	107.661	0.469939	0.0123386
SPTB	277.656	0.469912	7.38206e-05
PAPSS2	867.041	0.46991	6.31759e-11
RP11-58O9.2	243.002	0.469826	0.000257653
BTN2A3P	103.343	0.469542	0.0200255
OBSCN	294.521	0.469046	8.0215e-05
DAGLB	704.884	0.468029	2.01538e-09
ZNF133	272.67	0.467788	0.000116698
RP11-159D12.2	448.368	0.467704	4.32138e-05
S100A4	1684.35	0.467148	7.89693e-13
GRIP2	156.582	0.46685	0.00468463
DDX26B	218.485	0.466729	0.00111138
CTB-89H12.4	641.709	0.466631	2.13086e-06
CTSD	2371.74	0.46555	1.46797e-13
PYROXD2	100.46	0.465462	0.0166235
GSAP	151.867	0.465174	0.0029635
S100P	170.69	0.464395	0.00748877
STK19	113.538	0.464204	0.00972647
NEU1	781.424	0.464047	6.79784e-09
ACACB	857.128	0.464018	1.95828e-10
FKBP10	2377.48	0.463683	9.18229e-18
LINC-PINT	106.044	0.463481	0.0149782
STAT1	4544.62	0.463022	2.97426e-24
IFIT3	311.692	0.462436	6.64764e-05
MAP6	222.286	0.462172	0.000548853
WNT5A	799.573	0.461919	3.80033e-10
DHRS7B	210.068	0.461836	0.000572088
NSUN5P1	133.296	0.460456	0.015052
TEP1	930.835	0.459807	8.79819e-09
SRD5A3	400.358	0.459439	1.24549e-05
ZNF226	177.536	0.459037	0.00164318
RPS6KL1	148.37	0.45781	0.00506334
LRP2	161.601	0.457495	0.00420768
STAG3L5P	112.211	0.457347	0.0229714
RP11-448A19.1	151.673	0.456298	0.00470875
BTD	175.069	0.456186	0.0136759
ZNF419	233.935	0.456002	0.000654925
TMEM161B-AS1	232.206	0.455933	0.000354408
PGAP3	97.2581	0.455368	0.0207656
PQLC2	218.623	0.455137	0.00236209
IFIH1	77.395	0.454176	0.0425856
CREBZF	1325.08	0.453742	1.20707e-11
MT-ND6	26215.8	0.453465	0.00907009
SERPINH1	656.933	0.453427	8.50442e-08
MEF2BNB	174.719	0.453229	0.00353918
IFNLR1	323.613	0.452534	4.11498e-05
CCRL2	247.763	0.452505	0.000512849
RP4-591C20.9	235.181	0.452467	0.000677909
ANO1	708.239	0.451829	1.22926e-07
MN1	362.706	0.451714	1.24855e-05
COL5A1	1120.1	0.451528	2.24957e-09
UBE2L6	369.012	0.45145	2.13808e-05
ARRDC4	90.2736	0.451419	0.0277659
CLYBL	78.6709	0.450646	0.0369234
TRPM2-AS	100.697	0.45011	0.0251719
RP11-252A24.2	95.6379	0.449928	0.0271587
RAPGEF3	151.086	0.449535	0.00881059
HLA-A	4394.59	0.449094	1.05344e-21
ANKRD36	233.94	0.448565	0.000588614
SLC25A25-AS1	101.326	0.448188	0.021564
AC083843.1	163.547	0.447229	0.00491493
SCYL3	81.2438	0.446786	0.0355215
chr22-38_28785274-29006793.1	112.669	0.446028	0.0161767
GPR153	2405.81	0.445845	3.93948e-17
FN1	5513.56	0.445274	5.16406e-17
PIK3C2B	710.595	0.444635	5.12528e-08
AP000648.5	85.716	0.44434	0.0482039
NECAB3	381.278	0.444049	2.15961e-05
CTD-2583A14.8	76.2656	0.443789	0.0465159
ZNF814	343.648	0.44372	3.41073e-05
AC141586.5	114.771	0.443576	0.0151597
NBPF1	5928.17	0.44326	3.76315e-26
TMEM187	232.549	0.443249	0.000639793
CCDC40	89.3196	0.442971	0.0346172
VMAC	85.983	0.442533	0.0446248
FAM115C	200.429	0.442053	0.00247614
BAMBI	77.7582	0.442016	0.0428509
ZNF182	188.399	0.441972	0.00348198
RP11-727A23.5	82.1048	0.441886	0.0374676
CCDC64	107.928	0.441681	0.0329488
GRN	9738.56	0.441637	5.14753e-23
FUK	220.96	0.441113	0.000928828
TP53	81.9547	0.440919	0.0373628
ZNF436	326.88	0.440589	5.27585e-05
MAP2	90.2852	0.44029	0.0319815
GEM	454.456	0.440234	5.42716e-06
GABPB1-AS1	1098.37	0.439348	1.3049e-08
RAC2	1424.04	0.438837	2.7922e-13
CRELD1	287.822	0.438271	0.000605909
GAB1	296.244	0.437734	0.000246562
RBP4	969.551	0.4359	1.17455e-10
FADS3	539.36	0.435829	4.72225e-07
TUB	230.562	0.435268	0.00106355
OXSM	232.496	0.434807	0.00146256
CYP2S1	225.48	0.434362	0.00218968
SPPL2B	279.074	0.434346	0.000617403
PLOD2	1901.32	0.434336	7.79654e-17
KRT15	301.447	0.434203	0.000154116
LYST	182.298	0.434153	0.00369145
POMT2	609.354	0.434034	1.31899e-07
ZNRD1-AS1	170.387	0.433847	0.00733975
CLCN1	136.41	0.43381	0.0172419
BMS1P4	105.112	0.432948	0.0266818
CPE	564.225	0.432841	1.04759e-06
SLC6A9	603.266	0.431812	1.37038e-06
TM2D3	156.156	0.430931	0.00800092
ITGA3	12375.6	0.43087	6.19455e-32
UAP1L1	294.194	0.430323	0.00028251
GDPD5	305.371	0.429854	0.000322144
WDR60	572.222	0.429097	1.18537e-06
RP11-1246C19.1	76.8778	0.428866	0.0494161
ACBD4	221.512	0.428494	0.0037976
KLHL28	223.976	0.426649	0.00132131
JAK3	253.192	0.425789	0.00065508
IL18	883.05	0.425434	1.03068e-08
ZNF767P	202.811	0.42528	0.00343795
TOB1	925.483	0.425189	1.9482e-09
PTK6	341.703	0.424399	0.00039923
DNAJC16	547.745	0.423825	1.1559e-06
LGMN	1210.78	0.423821	7.51966e-12
SLC33A1	1239.06	0.423629	3.60131e-11
MT-ND5	102946	0.423455	0.00506778
RNPC3	241.915	0.422936	0.00257231
SH3RF2	102.334	0.422909	0.0306893
GAS5	504.075	0.422484	8.97283e-06
ZNF189	153.741	0.422182	0.00882298
TK2	248.08	0.421931	0.00114092
PTGES	160.056	0.420842	0.00745994
ECHDC2	698.893	0.420701	4.96064e-08
SGK1	299.079	0.420479	0.000257302
SEMA7A	920.219	0.420279	8.16507e-09
NDRG1	14475.4	0.420072	4.93491e-26
CD44	8104.65	0.419774	2.69983e-34
WDR27	380.597	0.419224	7.56259e-05
ZNF417	215.353	0.418776	0.00299567
TMEM161B	710.428	0.418423	1.36165e-07
LEPREL4	762.163	0.417208	1.13224e-07
MTRF1	109.825	0.416817	0.0264162
OPLAH	799.216	0.416695	5.89108e-07
KLHL35	122.92	0.415982	0.0165609
PHLDB2	882.758	0.41596	7.21618e-09
ZNF786	223.502	0.415497	0.00210398
SERPINB6	3168.62	0.415343	1.53682e-18
MEGF8	784.199	0.415183	2.89947e-07
RP11-632K20.7	92.4636	0.414821	0.0411364
IFIT1	232.46	0.414211	0.0156102
ZNF467	159.373	0.413925	0.00884293
ACP6	2520.94	0.413884	8.30249e-15
MAT2A	7064.12	0.413646	1.51669e-23
SLC9A1	1508.97	0.413524	4.55715e-11
CNPY2	104.583	0.413505	0.0303623
RAB3A	363.971	0.412534	0.000549884
ZNF432	201.542	0.412398	0.00562031
MSANTD2	937.221	0.411679	4.21572e-08
ZSCAN31	278.99	0.411259	0.000475559
FAM214A	328.217	0.411193	0.000262113
PODXL	4705.52	0.41118	1.45923e-21
BST2	1900.88	0.410991	5.11001e-13
SHROOM3	655.559	0.410628	3.05724e-07
HMGCR	1138.47	0.410457	5.91756e-11
ZFYVE27	467.195	0.41027	3.11982e-05
TNFRSF10A	629.728	0.409818	9.31878e-07
LMBR1L	176.957	0.409426	0.00570039
L3MBTL1	165.393	0.40875	0.00964286
PCSK6	174.455	0.408745	0.00688561
SLC8B1	595.644	0.408553	1.7589e-06
C22orf29	470.248	0.408493	2.60799e-05
ZKSCAN3	130.557	0.408447	0.02237
UNC5C	159.016	0.408349	0.0108583
NUDT14	179.926	0.408258	0.00616252
PARP3	573.932	0.406868	2.06297e-06
TMCO4	366.01	0.406612	0.000199358
ADCK1	202.917	0.406476	0.00459056
DGKQ	311.991	0.406413	0.000354904
SPG7	1302.53	0.406067	4.58371e-09
BMP1	451.037	0.405775	2.75069e-05
ZBTB40	994.064	0.405637	2.06322e-09
RGL3	119.72	0.405344	0.0249676
CCS	360.163	0.404993	0.00011847
ZKSCAN4	105.53	0.40475	0.03742
ECM1	158.272	0.404562	0.0114726
NISCH	1364.92	0.404561	8.62828e-11
ITGA1	290.745	0.404262	0.00140336
SLC38A7	758.025	0.404195	1.31889e-07
GALNT6	2307.31	0.404021	5.12491e-16
HEATR5A	335.043	0.403727	0.000522515
FUCA1	293.91	0.403648	0.000539329
ARHGEF4	568.197	0.403416	5.09696e-06
GSTK1	2449.65	0.403367	6.48704e-15
DHRS3	1003.01	0.403317	1.91102e-08
RP11-1020A11.2	125.99	0.402933	0.0191683
MT-CO2	139955	0.40268	5.09211e-22
EIF2AK3	290.078	0.402153	0.000517056
CLCN3	1414.23	0.401576	1.40696e-11
SAMD9	620.667	0.401484	0.0315967
ATG16L1	1344.79	0.401456	3.36435e-09
MT-ND1	80184.9	0.401159	7.87287e-27
MCOLN1	508.817	0.400812	7.80766e-06
LOXL2	1343.94	0.400417	3.12289e-11
ERCC5	331.703	0.40019	0.00132083
AMPD3	627.509	0.400156	8.9799e-07
PLEKHN1	205.779	0.399632	0.00648099
TLDC1	868.112	0.398808	4.43935e-08
FAM162A	1362.91	0.398333	1.43849e-09
LDOC1	3586.17	0.398033	1.6469e-16
POFUT2	596.782	0.397756	2.32057e-06
CCNL1	1284.92	0.397699	4.32345e-10
LTBP2	797.537	0.396061	2.47521e-07
SPEG	589.521	0.396028	2.18992e-06
SLC39A13	537.269	0.395931	1.03852e-05
PLTP	1394.78	0.395798	1.75518e-11
ANKRD36C	2693.84	0.395668	2.47725e-12
C1GALT1C1	529.446	0.39558	1.61818e-05
MT-CO1	333723	0.39549	1.24953e-19
BCL9L	2949.32	0.3952	6.03289e-14
BTN3A1	164.273	0.394704	0.0107036
IKBKG	232.097	0.39465	0.00332592
TRIM47	482.1	0.394548	3.10646e-05
AC000123.2	126.753	0.394483	0.024112
MT2A	4322.04	0.394312	1.18811e-12
PLA2G7	193.552	0.394251	0.00539363
SIAE	856.218	0.393726	8.12655e-07
CCDC57	567.041	0.393717	6.99513e-06
MT-ND4	260011	0.393532	1.93244e-33
PORCN	314.15	0.393372	0.000381762
LRIG2	708.557	0.393257	2.79679e-06
CSRNP3	143.175	0.392978	0.0249383
PCDH7	142.51	0.392913	0.0209972
AGRN	4486.7	0.392865	6.34424e-15
GABARAPL1	325.492	0.392546	0.000434225
PRDM8	843.993	0.392288	3.98767e-07
NCSTN	1740.99	0.39202	1.00084e-12
SLC38A6	230.981	0.391399	0.00710364
KDR	716.284	0.391354	4.19357e-07
LUC7L3	2477.7	0.390968	0.00346587
ZNF343	371.645	0.389615	0.000363508
SC5D	1093.53	0.389173	5.18315e-09
BX322557.10	282.131	0.389005	0.000856491
ZNFX1	1910.44	0.388567	6.49289e-13
SECTM1	760.36	0.388199	2.30359e-06
LDLR	6721.63	0.387408	1.35512e-26
ATP1A3	445.944	0.387286	3.75256e-05
ATG14	880.891	0.387134	5.26789e-08
SUMF1	504.376	0.386951	1.96944e-05
PRPF39	657.695	0.386837	5.32573e-06
PGM5P2	309.979	0.385763	0.00166214
PIEZO1	1785.04	0.385652	1.82962e-10
PCNXL2	679.277	0.385056	1.17085e-06
NOMO3	142.511	0.385024	0.0234275
PAX8	194.652	0.384798	0.00613208
OR7E38P	201.327	0.384732	0.00524161
POLG2	482.535	0.384086	3.48394e-05
PDE1C	511.263	0.383749	4.15822e-05
TSPEAR	197.892	0.38365	0.00996605
RP11-890B15.3	138.519	0.383406	0.0197148
TMEM59	1676.12	0.382802	1.3612e-10
LIPG	342.427	0.382692	0.000738416
KIAA1462	1154.21	0.382633	1.98908e-09
SLC25A30	299.219	0.382631	0.000815936
TMEM41B	809.818	0.382473	1.51228e-06
RASSF4	121.6	0.381588	0.0308977
RHOBTB3	1019.85	0.380726	2.07805e-07
ERBB2	774.437	0.380709	1.39958e-06
RNF145	834.922	0.380626	4.09817e-07
C3orf62	161.679	0.380285	0.01398
TSPAN31	292.96	0.380212	0.00133251
ZNF397	309.476	0.380026	0.00127201
TMEM80	162.462	0.379957	0.0173522
RP11-629O1.2	133.395	0.379123	0.0289205
RRBP1	7204.74	0.379029	3.69227e-15
PLEK2	804.284	0.378968	7.17732e-07
S1PR1	269.649	0.378811	0.00198925
ATP2B4	3670.19	0.378697	1.32319e-15
WDR45	248.201	0.378487	0.00273989
NT5E	1595.05	0.377806	3.1377e-11
GAA	2228.44	0.377588	5.87391e-10
LAMC2	2133.44	0.377331	3.42196e-12
NAGLU	184.375	0.377022	0.0187068
GALNS	751.287	0.376489	6.47381e-07
CLCN7	808.018	0.375463	1.53201e-06
PEX11A	203.592	0.375452	0.00676849
SLC35F6	625.868	0.375207	2.66181e-05
TARBP1	511.447	0.374961	0.000114956
CCDC84	520.497	0.374689	2.85075e-05
SLC25A20	311.489	0.374487	0.00088924
GPR173	173.146	0.374061	0.0132366
LRRC38	255.024	0.374027	0.00226465
KIAA0513	404.77	0.374003	0.000371832
RAB27B	1002.7	0.373581	2.16324e-07
ZNF600	220.987	0.373527	0.00501106
PRKAB2	1335.06	0.373304	1.55899e-09
TCP11L2	237.855	0.373245	0.00517485
GPR98	829.117	0.373085	2.06302e-07
KCNK1	561.091	0.372854	1.63797e-05
HELZ2	1025.32	0.372686	0.0182397
OAS1	209.729	0.372539	0.010694
ZNF785	128.019	0.372286	0.0329834
DUSP8P5	210.445	0.371791	0.00557431
NUDT13	110.271	0.371759	0.0433935
ADAM15	10471	0.371492	1.41625e-19
CCNT1	1177.85	0.371399	2.25684e-08
ZDHHC9	2630.57	0.371057	2.30152e-13
ZNF691	123.894	0.370944	0.0397379
RP3-323A16.1	121.246	0.370812	0.0404196
DMPK	118.746	0.370526	0.0372606
SEZ6L2	1658.94	0.370321	7.03464e-09
TMEM161A	776.348	0.370101	1.35502e-06
ARHGEF37	251.577	0.369938	0.00339144
ZNF587	881.187	0.369863	4.49712e-07
MT-CYB	88849.6	0.369752	1.56783e-26
NBPF12	198.934	0.369575	0.00875723
GBA	1037.71	0.368838	1.5023e-07
GPER1	178.818	0.368701	0.0127636
RUFY3	298.997	0.36866	0.001503
ANKMY1	237.906	0.368258	0.00427625
COL4A6	713.406	0.368226	1.57693e-06
PLXNB2	2096.77	0.368081	2.0374e-09
ERP44	912.033	0.368073	2.69449e-07
TUBB3	3483.71	0.367965	2.10713e-17
TMEM38A	158.739	0.367782	0.0206448
DHRSX	158.392	0.367582	0.0168989
DCAF8	2674.11	0.367465	1.64223e-14
SATB1	252.505	0.367059	0.0035213
NFKB2	485.827	0.366799	0.000131983
ANXA3	352.22	0.366628	0.000885696
CYP2R1	251.439	0.366064	0.00346109
SLC15A4	310.365	0.365641	0.00199229
ZBTB48	372.277	0.365397	0.00127872
PLA2G15	241.889	0.365382	0.00388688
RHBDD3	224.545	0.365256	0.00578122
TXNRD3	117.025	0.364828	0.049495
TOB2	816.553	0.364701	5.128e-07
LAMA5	8985.53	0.363659	2.53009e-18
SYVN1	1220.72	0.363171	5.75759e-07
NPC1	2355.25	0.36301	1.56022e-12
CASP4	363.987	0.362767	0.00136565
ZNF211	229.863	0.362405	0.00714766
MT-TP	2836.44	0.361993	0.00133071
CPNE7	417.151	0.361945	0.000614311
PSMB8	212.094	0.361188	0.0138428
EHD3	286.157	0.361166	0.00235144
AC003102.3	183.713	0.360942	0.0161166
CYB5R1	512.523	0.360748	0.000421898
SP110	176.828	0.359972	0.0229922
SPATA20	1548.65	0.35974	1.07078e-09
DSC3	2233.88	0.358862	3.9938e-12
ZNF449	221.343	0.358832	0.008102
ALDOC	482.954	0.358694	0.0002348
PSD4	498.876	0.358345	7.89084e-05
CTC-444N24.11	388.026	0.358264	0.00128524
TANC1	698.051	0.358257	8.69629e-06
GRAMD1B	1509.16	0.358114	5.26378e-09
HRH1	264.158	0.358017	0.0030459
MLYCD	175.477	0.357792	0.0173969
ZNF562	513.385	0.357552	4.51637e-05
MOB3C	430.84	0.357442	0.000199639
SLC30A7	949.862	0.356967	2.09113e-06
SETD4	270.705	0.356902	0.00402536
CPVL	438.834	0.356886	0.000396914
ZNF84	262.801	0.355976	0.00411072
ASAH1	626.482	0.355909	1.73913e-05
OSBP2	299.291	0.355718	0.00261986
CD151	4164.35	0.355688	7.06332e-15
ZNF264	734.397	0.355464	2.44516e-05
TLL1	351.274	0.355323	0.000894593
CLIP4	279.795	0.355273	0.00240295
ARFIP2	1590.68	0.354782	1.70826e-08
CBLB	421.031	0.354721	0.000741162
PKP3	709.825	0.354672	5.46618e-06
PDE5A	157.082	0.354397	0.0304543
ELFN2	1088.28	0.354267	4.16464e-08
TPP1	3754.76	0.353962	1.96735e-12
TNKS1BP1	2596.27	0.353694	1.85994e-11
UGCG	335.925	0.353287	0.00173135
AMIGO2	766.949	0.35318	3.50681e-06
MFSD8	166.727	0.352623	0.0339767
CLPTM1	1975.2	0.352155	1.5024e-10
ATP8A2	162.223	0.352058	0.0303198
ANKS3	141.736	0.350963	0.0334214
P4HA2	678.397	0.350914	1.56803e-05
ID3	274.242	0.350738	0.00383566
TM9SF2	2713.39	0.348831	2.85693e-14
TMEM87B	1019.02	0.348671	1.42965e-07
LRRC8A	2784.54	0.348519	3.8038e-11
TM9SF4	3636.78	0.34838	2.70176e-16
EPHA3	137.504	0.348193	0.0382475
KIAA0895L	440.323	0.348165	0.000272292
DNASE1L1	262.421	0.348126	0.00636035
TMX2	2715.14	0.348064	1.00298e-10
MGST2	454.661	0.347695	0.000819831
ERVK13-1	196.726	0.347513	0.0197328
MTATP6P1	20867	0.347468	7.39876e-12
PCYOX1L	994.151	0.346878	1.95036e-07
DPY19L3	190.691	0.346779	0.0156965
GJA1	1900.58	0.346434	2.82295e-11
Y_RNA	272.227	0.346267	0.00430287
TMEM205	506.933	0.346208	0.000682294
ZBTB1	871.713	0.345756	2.41647e-06
ACOX1	1599.34	0.344629	3.41283e-10
TMEM221	176.693	0.34452	0.0237325
PARM1	244.166	0.344497	0.00715062
CALR	26151	0.344477	3.50391e-17
GLB1L3	214.303	0.343905	0.011062
EPHA2	11908.9	0.343892	2.12613e-22
ANKRD49	196.415	0.343716	0.0185395
PEX12	136.961	0.343469	0.0459366
CD59	12779.5	0.343193	5.23983e-21
OSGIN1	265.13	0.343111	0.00523466
PDK1	1106.26	0.342949	7.11045e-07
SLC35A2	953.672	0.342746	2.05169e-06
NEDD9	217.78	0.342516	0.0137503
AC024560.3	339.43	0.34227	0.00229544
CLCN2	193.445	0.341877	0.0162697
FITM2	879.344	0.341701	8.34134e-06
TGFA	423.851	0.341606	0.000743877
SLC25A29	407.669	0.341449	0.000483028
SLC20A1	5289.3	0.341308	2.39786e-16
LFNG	216.147	0.341112	0.0206541
KRT8	1928.22	0.340717	1.26936e-09
ITPRIP	933.192	0.340532	7.73571e-07
ENC1	1675.69	0.338332	1.23658e-08
SLC16A3	4633.5	0.338232	1.16629e-09
NHLRC3	182.109	0.337992	0.0259525
ZNF550	353.884	0.337797	0.00389876
VAV3	155.084	0.336946	0.0380364
CFLAR	999.838	0.336643	2.15194e-06
SEC24D	1251.03	0.33638	1.96415e-07
PGK1	38557.8	0.336342	2.06048e-27
2021-03-06	3042.96	0.335745	3.01244e-11
PLA2R1	312.785	0.335713	0.00314789
CALCOCO1	798.6	0.335534	2.69996e-05
CUL7	539.776	0.335471	0.000179603
ZDHHC23	149.952	0.335306	0.0363893
FBN1	1580.19	0.335296	6.85358e-09
APOL6	865.463	0.334956	7.24339e-06
CNNM4	597.922	0.334777	5.13408e-05
TPM2	174.199	0.334677	0.0337149
NAPB	330.342	0.334523	0.00391114
BTN2A2	345.141	0.334321	0.00221033
KIAA0319L	1134.26	0.334049	2.96062e-07
ALG8	800.895	0.333864	9.8627e-06
RHPN1	346.539	0.333679	0.00282833
TTYH2	561.506	0.333001	0.000135946
EPHB6	795.068	0.332664	6.46529e-05
POGLUT1	374.698	0.33266	0.0016755
ST3GAL6	197.018	0.332088	0.0243103
TRPT1	168.224	0.331748	0.0288334
ELMOD3	247.238	0.331722	0.0109647
CLK3	820.26	0.331539	6.02926e-06
PSAP	8862.71	0.331436	5.906e-14
ABCC1	2076.32	0.331394	1.90979e-10
GYS1	1455.54	0.331367	1.63747e-07
CNKSR3	648.679	0.331088	7.19365e-05
SMPD1	596.388	0.330781	9.02872e-05
PTPRM	395.524	0.33055	0.00246593
PLOD1	6057.57	0.330376	2.21511e-15
ZNF91	626.077	0.330336	0.000155259
ITPR1	2045.7	0.330305	1.217e-09
PXDC1	576.883	0.330182	0.000245209
MPG	758.729	0.330092	3.5603e-05
TRIOBP	532.48	0.329679	0.000212551
VEGFC	1508.69	0.329516	2.95475e-08
RABGAP1	1006.78	0.328624	3.62121e-05
GPR108	804.704	0.328521	1.35563e-05
FNBP4	1452.48	0.328342	1.19423e-07
PAQR7	168.655	0.328059	0.0390182
FAM86DP	537.237	0.327973	0.000207945
USP35	249.836	0.327806	0.00786159
DECR2	151.248	0.327455	0.046011
AGPAT9	398.106	0.326426	0.00120544
VIMP	493.283	0.326293	0.000565198
CGREF1	440.682	0.326132	0.00181465
REEP6	384.635	0.326003	0.00153937
NEO1	150.428	0.32585	0.0401891
SRPRB	1109.67	0.325754	4.05535e-07
SEPT7P2	177.887	0.325146	0.0329661
PARS2	180.488	0.325034	0.0285218
NFAT5	1708.09	0.324845	6.43416e-06
ZNF431	606.294	0.324735	0.000261411
MAN2B2	678.858	0.324546	3.2635e-05
SUN1	3271.75	0.32313	9.07601e-14
ZNF160	789.113	0.322977	2.05885e-05
APBA3	166.717	0.322784	0.0419835
CERS2	2974.52	0.322749	5.15225e-11
PNPLA6	2108.5	0.322737	4.36817e-08
ASL	254.289	0.32273	0.0138692
TSEN2	672.16	0.32264	3.8267e-05
TMEM179B	361.004	0.322579	0.00189603
SPTLC1	1011.14	0.321832	1.40769e-05
MT-ATP6	83316.5	0.321782	3.00059e-19
RALGDS	1023.05	0.321672	2.54486e-06
ZNF460	356.415	0.32153	0.00459801
CD24	1066.74	0.321406	1.08956e-05
AGA	263.205	0.321402	0.0121039
EVPL	888.94	0.321143	3.3716e-05
ACAD8	765.167	0.321046	1.93825e-05
GFM2	698.453	0.320611	0.000103598
SGSM2	666.902	0.320565	0.000152727
SEC61A1	6169.97	0.320526	4.39168e-12
TXNIP	1873.63	0.320264	1.72995e-07
RCE1	263.774	0.320176	0.00758858
PLOD3	2895.65	0.320175	5.06859e-11
AHNAK	41835	0.320003	4.19629e-19
LTBR	2299.99	0.319828	6.39358e-09
ZNF266	552.724	0.31973	0.000252151
ANTXR2	3536.39	0.319268	4.91701e-12
CD33	441.464	0.31922	0.0017082
VEGFA	1143.72	0.319148	6.9198e-07
SPINT1	306.482	0.319001	0.00594605
FAM46A	144.861	0.318971	0.0463675
CDK10	517.993	0.31889	0.000302925
ABCG1	476.467	0.318614	0.000692502
PLD3	1162.45	0.318037	1.79047e-06
LRP5	2862.27	0.317389	3.27088e-11
LINC00263	529.442	0.317007	0.000597835
ZNF680	213.25	0.316696	0.0300553
CD276	1260.2	0.316153	4.52721e-07
LUC7L	491.715	0.315897	0.000724615
KRBOX4	325.997	0.315758	0.00485684
C16orf58	572.854	0.31573	0.000682988
PTK2B	155.161	0.31571	0.044805
YIPF2	706.8	0.315547	0.000416357
USO1	871.252	0.315374	3.14033e-05
USP20	640.48	0.315033	0.000131133
CANT1	2904.55	0.314448	9.67108e-10
SYNGR2	1833.38	0.314379	6.44676e-09
NPR2	278.454	0.314261	0.00963175
SH2D3A	235.861	0.313817	0.021854
LMAN2L	572.594	0.313614	0.000396284
DNHD1	383.521	0.313302	0.00192916
SYNE1	392.78	0.313243	0.00296644
NOP14-AS1	325.514	0.313105	0.00816815
PBXIP1	897.309	0.31296	3.71327e-05
SLC25A37	1495.08	0.312874	2.8995e-08
SGPP1	908.411	0.312856	1.04394e-05
KLF3	573.087	0.312502	0.000196048
SLC35F5	990.855	0.312497	2.40524e-06
TMEM33	1520.61	0.312457	6.48292e-08
BCAR3	2507.1	0.312309	1.57198e-10
ZNF708	278.316	0.312226	0.0123692
MAN1B1	1768.55	0.311999	1.22439e-08
INTS3	1454.81	0.311904	1.28525e-06
BTN3A2	244.288	0.311637	0.0328622
MANBA	290.789	0.31154	0.00629874
ZNF394	285.167	0.311497	0.0156984
ZFYVE28	363.569	0.31126	0.00328948
NCDN	1204.44	0.311159	2.47718e-06
SH2D4A	535.567	0.311051	0.00035462
EPCAM	342.282	0.310588	0.00794099
PPP4R1L	267.898	0.310142	0.0186925
TRIM52	261.192	0.310027	0.0109297
PTDSS2	880.385	0.309899	2.77987e-05
SLFN5	917.265	0.309627	1.05526e-05
LRP10	7645.26	0.309422	4.79043e-12
CDK5RAP3	1113.33	0.309358	8.64242e-06
SNPH	247.218	0.309348	0.0157885
MTHFR	258.907	0.309242	0.0167607
TMEM170A	288.454	0.309126	0.0169921
POMT1	566.438	0.308921	0.000647231
ATAT1	159.688	0.308916	0.043866
FAM193B	498.084	0.308209	0.000787585
ZMPSTE24	1698.87	0.307974	2.60038e-06
STX16	1349.39	0.307567	4.12067e-07
ITPKC	164.245	0.307512	0.040455
ZNF324	358.93	0.307436	0.00290953
RNF215	220.482	0.307337	0.0237234
KDM4B	1124.58	0.30724	7.77254e-06
ELL2	1142.01	0.307121	1.27896e-06
PICK1	350.132	0.306942	0.00446797
DHX32	667.517	0.30663	0.000412902
ENDOD1	1144.48	0.306616	9.9285e-07
PLEKHM1	723.59	0.306355	0.000150727
ISG20	450.266	0.30627	0.00339889
LMLN	427.489	0.306069	0.00324486
DDX39B	1145.71	0.30598	1.63689e-06
ZBTB7B	919.781	0.305645	1.88957e-05
ERAP2	263.561	0.305615	0.0143706
DGAT1	2005.27	0.305598	3.93794e-09
F11R	914.95	0.305453	2.64072e-05
ARL6IP5	991.621	0.304478	1.21243e-05
TCIRG1	315.372	0.303478	0.00599228
TFAP2A	1461.57	0.303107	2.47838e-07
SLC37A3	791.008	0.303	5.20931e-05
PARP8	220.219	0.302837	0.0231971
ZSWIM8	2775.02	0.302594	2.50546e-08
IFITM3	1553.12	0.302214	1.64212e-05
ARL4C	615.987	0.30211	0.000368605
CD70	894.229	0.301932	2.1227e-05
LAPTM4A	2122.19	0.30166	2.66945e-06
PSMD5-AS1	285.537	0.301424	0.0157288
PNRC1	540.588	0.301377	0.000606575
MYSM1	1152.89	0.30085	1.22376e-05
PRDX4	2260.9	0.300684	2.34623e-09
TRIM3	263.188	0.3006	0.015262
ZNF331	541.628	0.300499	0.00110579
ZFHX4	1871.74	0.300441	6.339e-08
KCTD13	344.646	0.300405	0.00513828
ZNF557	335.887	0.300338	0.00605032
F2R	2484.27	0.300254	7.66881e-07
PPL	1794.59	0.300223	1.19249e-05
KDM3A	1004.39	0.299813	1.39857e-05
ID2	835.425	0.299807	0.000176159
CHST2	418.817	0.29979	0.00255638
MT-ND2	71209.2	0.29969	2.30268e-11
ERGIC3	3888.77	0.29964	5.06913e-13
NPEPPS	2663.06	0.299538	2.35373e-10
TRANK1	217.313	0.299465	0.0298976
GM2A	1880.95	0.299455	2.8638e-07
ABCD4	552.793	0.29942	0.00147735
PALMD	292.666	0.299278	0.0202836
SH3BP2	1287.79	0.298606	5.56908e-05
LTB4R	246.855	0.298135	0.0171307
CMTR2	312.129	0.298048	0.0114484
TMEM41A	545.705	0.296783	0.000623241
GABBR1	220.446	0.29654	0.0297109
ERVK3-1	395.726	0.296205	0.00497046
TMEM67	192.067	0.296191	0.0422931
FAM160B2	490.827	0.295858	0.00128839
SIRT7	529.287	0.295783	0.000946167
NDRG4	701.734	0.295553	0.000221781
GMPPA	550.798	0.295257	0.000862279
SDF2	293.573	0.29492	0.013494
TG	640.537	0.294898	0.000522092
MYH15	670.985	0.294791	0.000417148
PUS3	195.389	0.294407	0.0364242
PIAS2	564.386	0.294222	0.000719933
EXOC8	400.746	0.294166	0.00633301
NAT9	646.89	0.2939	0.000559439
LRSAM1	381.703	0.293246	0.00649421
PFKFB3	1296.32	0.293126	9.19487e-07
SPINT2	1400.46	0.293098	3.28403e-06
TTC17	1284.12	0.293057	6.47993e-06
ZNF320	454.852	0.293046	0.00322191
TAPBP	1820.61	0.292899	3.73705e-06
STAT6	782.834	0.292594	0.000213864
UBN2	815.153	0.29257	0.000354447
ZDHHC24	241.285	0.292565	0.0426973
UQCC1	1607.6	0.2924	2.28799e-07
PRDM10	380.273	0.292196	0.00555032
ZNF543	180.948	0.292159	0.0431488
CTSC	3120.61	0.291322	4.99904e-11
SLC7A6	404.31	0.291313	0.00376176
SUMF2	1298.72	0.290924	1.33611e-05
B2M	8612.52	0.290841	4.51097e-13
TMEM43	2043.41	0.290789	5.93692e-09
ECE1	3034.89	0.29054	8.99679e-11
FCHSD1	246.09	0.290384	0.0185827
ZNF589	472.454	0.290282	0.00160068
F2RL1	2686.2	0.290182	2.0192e-08
HM13	4660.52	0.290132	1.6657e-12
BSG	7455.56	0.289882	9.54396e-14
ILVBL	937.693	0.289765	0.000196811
HCFC2	367.295	0.289541	0.00783388
TP53I11	427.072	0.289423	0.00462278
RABAC1	488.826	0.289221	0.00291056
S100A13	1104.69	0.289176	0.000108449
COL6A1	22929.8	0.289162	2.67616e-10
ZSCAN9	184.014	0.289089	0.0444096
DNASE1	238.312	0.289033	0.0252038
FNTA	312.549	0.288716	0.0121091
CD63	7398.73	0.288618	6.36472e-09
UPP1	620.124	0.288325	0.00215777
PCTP	464.627	0.28825	0.00292069
ABCD1	2264.69	0.287976	1.20284e-06
ERRFI1	4798.87	0.287908	1.42391e-13
DOLK	550.818	0.287865	0.000768363
TUBGCP6	521.199	0.287755	0.00122436
LACTB	238.389	0.287575	0.0283847
ITGAV	1912.2	0.287503	7.62482e-07
ZNF530	207.504	0.286459	0.0350727
SMURF2	1485.24	0.286345	7.93631e-06
ADAM19	2851.82	0.286294	9.57119e-09
HEATR5B	500.349	0.286236	0.00264939
ZNF251	623.214	0.286031	0.000499723
INPP4B	279.7	0.285857	0.0147486
ATP6AP1	2499.99	0.285639	6.01663e-08
C20orf194	332.738	0.285091	0.00837012
COL27A1	480.108	0.284999	0.00238152
C5orf42	380.256	0.284943	0.0158102
LATS2	205.101	0.28494	0.0463032
MYOF	15576.7	0.28492	4.12547e-12
YIPF3	1301.04	0.284736	1.04757e-05
HSPA8	29805	0.284482	0.000955055
SLC12A7	955.276	0.28424	5.36613e-05
2021-03-01	592.937	0.283714	0.000680601
MAN2A2	315.01	0.283607	0.0106701
ANXA5	13230.4	0.283556	8.49291e-11
CPOX	962.041	0.283269	3.77288e-05
ZNF365	703.77	0.283089	0.000579549
MTMR9	274.247	0.283049	0.0175618
TPRA1	290.658	0.282658	0.0205453
G6PC3	2369.98	0.282556	1.07195e-07
EMP3	657.073	0.282529	0.000576842
CTNS	301.358	0.282474	0.0151629
DPH7	456.382	0.282458	0.00468847
ZNF440	211.774	0.28234	0.0372189
P4HTM	475.129	0.282215	0.00362372
INPPL1	2045.75	0.281168	5.72789e-07
SYT7	731.128	0.281074	0.000341055
C9orf89	545.14	0.280864	0.00294816
NKTR	1629.34	0.280198	0.000228264
FAM13B	454.806	0.280143	0.00612535
RPH3AL	383.833	0.280102	0.0119347
MT1X	335.482	0.280011	0.0124833
TMEM175	358.904	0.279872	0.00691091
SGK223	767.919	0.279551	0.00115974
TMBIM1	1407.8	0.279515	1.3774e-06
SLC17A5	216.616	0.279477	0.0360394
TMCO1	2068.9	0.279104	5.90682e-08
KDM7A	290.293	0.278536	0.014798
TRAFD1	1090.04	0.277994	3.58744e-05
ABHD3	803.773	0.277944	0.000140571
TSC22D2	560.672	0.277882	0.00565285
TST	198.313	0.277875	0.0486175
RNF123	708.552	0.276965	0.0014821
ATP9B	473.194	0.276696	0.00303085
TSPAN15	3022.48	0.276602	5.34266e-10
UNC13B	1309.9	0.27607	4.21105e-06
NOL3	726.865	0.275801	0.000278551
BHLHE40	6085.22	0.275441	0.00809917
CD97	2233	0.275318	1.63431e-08
RNF146	232.36	0.27491	0.0438126
CYB5D2	263.187	0.274726	0.0245258
GLB1	941.357	0.274712	6.21834e-05
TRIM69	532.099	0.274515	0.00206954
ELOVL1	1815.37	0.274361	8.78595e-07
LPAR6	306.959	0.274165	0.0380627
RRAS	677.457	0.273612	0.00132224
SLC38A9	245.469	0.273575	0.0295868
TBL2	1173.08	0.273437	9.31836e-05
MAGED2	1526.02	0.27296	2.2542e-06
ABCB9	218.646	0.272845	0.0475366
MROH1	1464.59	0.272395	6.784e-06
PNPLA4	552.256	0.272337	0.00161739
LHX1	671.104	0.272159	0.000980904
EEF1A2	3521.91	0.271933	3.94775e-09
MLH3	457.097	0.271793	0.00452698
COX6A1	1202.04	0.271745	0.000143959
NBPF8P	322.734	0.271102	0.0207451
LETMD1	1098.32	0.27098	0.000133664
MOSPD2	435.022	0.270803	0.00638614
KIAA0247	338.112	0.270343	0.0125252
ATP6V0E1	1562.17	0.270147	4.77499e-06
CTSB	4178.27	0.27007	2.88688e-09
CERCAM	706.646	0.26987	0.00131162
DCBLD1	244.488	0.269623	0.0410135
LINC00857	529.501	0.269579	0.00209952
CENPT	436.631	0.269484	0.00891202
EPT1	1499.76	0.269358	2.26025e-06
TMEM254	795.313	0.269335	0.000443313
HSPA5	12261.4	0.269225	4.78669e-09
EIF1AD	686.094	0.268981	0.000629688
GSPT2	1160.8	0.268774	0.000101275
YIPF5	742.461	0.268754	0.000425442
PLAU	3144.19	0.268624	1.00264e-08
PARP12	641.479	0.268589	0.000787489
WSB1	633.785	0.268242	0.001271
ATP2A2	9140.98	0.268017	5.01487e-14
LEPRE1	726.024	0.267817	0.000833326
CCDC130	455.236	0.267379	0.00617369
C12orf73	264.148	0.266396	0.0291971
COBL	354.071	0.266196	0.0144268
SLC4A3	282.413	0.266191	0.0268851
WDR19	262.445	0.266179	0.0313908
C6orf141	587.074	0.266157	0.00158206
SZT2	1063.02	0.265932	5.07459e-05
GGCX	824.923	0.265733	0.000231907
RND3	1088.5	0.265671	0.000731672
TRIM66	633.412	0.265583	0.00134487
GLA	613.132	0.264859	0.00201118
HERC4	1725.41	0.264613	1.88008e-06
SELO	360.155	0.264589	0.0239393
LINC00839	222.264	0.264577	0.0466882
DGKE	934.433	0.264157	0.00038098
FBXL4	350.467	0.264141	0.0140712
DERL1	1945.52	0.264084	7.04688e-07
ATXN7L1	277.945	0.263802	0.0303315
KIAA0556	575.601	0.263578	0.00270741
CA12	1589.8	0.263393	2.7665e-05
PROCR	1023.93	0.263208	0.00045734
OPTN	255.783	0.262994	0.033428
ZNF605	437.275	0.262858	0.0104135
NIPAL3	1462.65	0.262784	3.40551e-05
RGS2	2176.14	0.262774	6.82423e-07
S1PR3	421.441	0.262368	0.0174901
CELSR3	375.054	0.262038	0.0124468
ATP9A	6108.4	0.261414	2.15995e-06
CLCC1	747.472	0.261312	0.0012344
ZNF141	239.219	0.261171	0.039598
LIMA1	861.017	0.26071	0.000349585
CHPF	1660.74	0.260683	0.000247461
ETNK1	716.297	0.26045	0.00224023
C11orf1	245.174	0.260307	0.047382
SLC26A2	1343.63	0.259927	0.000121178
RCN1	3095.43	0.259373	1.03024e-08
ACAA1	535.082	0.2593	0.00299121
POLM	1079.69	0.259199	4.52377e-05
DSEL	393.537	0.258765	0.016149
SLC12A2	1587.58	0.258756	5.79619e-06
FBXW4	251.062	0.258662	0.0380785
FBXL20	405.785	0.258631	0.0104812
FBXL12	295.603	0.258545	0.0365314
EMC1	2629.95	0.258543	1.76846e-08
ALG3	1212.95	0.258091	0.000152481
URB1	1972.72	0.258018	1.49235e-06
METTL21B	229.316	0.257739	0.0486786
VMP1	2701.78	0.257613	2.20785e-08
TBKBP1	236.392	0.257246	0.0474729
PKD2	338.09	0.257231	0.017332
XK	270.278	0.257223	0.0316989
ALG1	445.413	0.257218	0.00831241
TMEM156	616.065	0.257163	0.0018633
SLCO4A1	4494.55	0.257116	1.63205e-09
COPB2	2760.15	0.25678	4.81599e-07
TRIB2	1100.81	0.256583	0.000125804
YIPF1	363.07	0.256175	0.0201543
ZNF185	5238.14	0.256116	1.10141e-09
MICA	442.981	0.256111	0.00641764
ZFC3H1	989.512	0.256091	0.000215658
AUP1	2366.09	0.255792	8.8012e-08
PVR	1151.21	0.255478	0.000109801
PIGM	581.861	0.255297	0.00303422
ZFYVE1	443.48	0.25527	0.00810338
PTPRS	2277.41	0.255254	4.22816e-07
FIS1	1119.7	0.25461	9.79316e-05
DOCK5	1641.72	0.254167	2.1553e-05
TFRC	12708	0.254094	1.06861e-12
MAGED1	6437.19	0.254064	1.00998e-08
MAN2B1	1251.94	0.253898	3.363e-05
STXBP2	740.011	0.253667	0.00112726
DGCR2	1052.83	0.25361	0.000316813
FAM120B	648.468	0.253367	0.00281944
SURF1	296.856	0.253056	0.0298119
GOLGA3	3490.38	0.253033	3.97566e-08
IRGQ	504.089	0.253031	0.010467
NAGK	449.828	0.252885	0.00990067
SCAMP2	953.674	0.252777	0.000975271
TMEM214	1477.07	0.252754	3.80553e-05
HSD17B2	377.914	0.25228	0.0143534
SLC35E1	1901.27	0.25215	8.57601e-06
ERMARD	270.714	0.251949	0.0383341
TMEM104	1199.08	0.251938	9.34489e-05
MEF2C	337.012	0.251227	0.0297822
EPM2AIP1	726.351	0.251036	0.00160253
EMC10	2151.27	0.250688	2.73559e-05
ST6GALNAC6	445.941	0.250206	0.0144724
RDH11	2777.73	0.250134	5.59866e-08
ANPEP	2627.79	0.249534	2.71214e-07
TTC21B	533.593	0.249364	0.00857175
SS18L1	478.553	0.249217	0.00571187
POR	2343.61	0.249014	5.64134e-06
ACSF3	638.085	0.248116	0.00234076
FAM135A	319.679	0.247845	0.0481916
ST3GAL1	17082.5	0.247504	1.7991e-13
SDC4	1737.63	0.247212	7.98668e-05
DNPEP	632.038	0.246405	0.00494601
ENOSF1	471.202	0.24619	0.00925981
WDR44	934.098	0.24611	0.0010181
ITFG3	1109.01	0.246016	0.000194945
PPM1M	332.676	0.245463	0.0221
SLC27A1	441.197	0.245391	0.00992218
SLC35C1	757.44	0.245039	0.00432581
TMEM115	1060.78	0.244699	0.000183421
USP53	459.543	0.244637	0.0170941
HINFP	311.334	0.24454	0.031014
OFD1	518.886	0.24426	0.00575816
FEM1C	447.029	0.244248	0.0158468
TNFRSF10B	1876.69	0.244166	8.40561e-06
ERN1	603.513	0.244042	0.00358066
C11orf24	1121.81	0.243518	0.000159677
P4HB	13676.8	0.243279	4.55388e-11
CEP164	1001.03	0.243211	0.000261512
TUBA4A	1356.12	0.242936	0.000138802
BTAF1	961.359	0.242767	0.00253589
NFKBIZ	968.276	0.242673	0.00169906
AFG3L1P	392.322	0.242335	0.0218711
SYNJ2	3910.75	0.242329	8.61347e-08
ARGLU1	780.126	0.242255	0.00172698
RNF216P1	431.597	0.242074	0.0109802
PCED1A	479.421	0.242007	0.00767262
ALG2	723.4	0.241981	0.00191133
RABGGTA	527.433	0.241222	0.0133912
ULK1	1792.15	0.241116	0.000183828
COQ9	1582.65	0.24098	3.12503e-05
DMTF1	1193.33	0.240967	0.000343246
MFSD12	708.343	0.240919	0.00287639
PLIN4	393.837	0.240886	0.021561
WFS1	1316.93	0.240696	0.00029958
TOR1B	446.204	0.240582	0.0137502
MRPS25	995.626	0.240544	0.00067373
RNF111	648.476	0.24047	0.0036742
STT3A	3554.58	0.24032	1.33202e-08
TCTN1	492.361	0.240196	0.00778877
CTSA	4491.17	0.240123	4.11166e-08
CEPT1	432.697	0.240088	0.0172944
CDK5	807.805	0.239811	0.00117762
ZKSCAN8	822.003	0.239705	0.00465082
GCNT2	384.274	0.239392	0.0242243
ZFAND2A	360.601	0.239361	0.0210861
SNX19	1681.02	0.239254	1.3148e-05
PDP1	547.481	0.239054	0.00767312
MT-CO3	126377	0.238859	6.22013e-12
CD109	2746.87	0.238748	1.81361e-06
ATP1B1	606.8	0.238686	0.00417585
C2CD2L	455.038	0.23839	0.02012
ZNF808	310.05	0.238309	0.0490708
TCTN3	809.473	0.238076	0.00187385
MBOAT7	2925.29	0.238069	1.30974e-06
FASTKD2	950.872	0.237669	0.000927291
SLC25A36	931.388	0.237496	0.000694398
HYAL2	650.656	0.237371	0.00413563
VPS18	879.874	0.2372	0.000686658
NCKAP5L	700.533	0.2371	0.00554616
TNFRSF11A	793.886	0.237055	0.00171928
CLK2	1078.78	0.236914	0.000266736
TCTA	598.274	0.236876	0.0147568
PTHLH	707.302	0.236824	0.00333313
VPS8	470.318	0.236761	0.0172946
LPPR2	2003.87	0.23627	9.23004e-06
SEC61G	1176.76	0.235483	0.000417125
SYNE3	711.483	0.235237	0.00333875
SFXN3	1840.03	0.234735	8.70024e-06
ETFB	859.464	0.234714	0.00199814
OS9	3532.96	0.234693	2.08999e-07
FLNC	4625.39	0.234675	5.31855e-06
OAF	788.191	0.234664	0.00135364
ADI1	1159.94	0.234525	0.000542038
IFT43	333.766	0.234453	0.0323618
MED15	951.653	0.234406	0.00121706
B3GALNT1	1025.24	0.233839	0.000409162
ACP2	524.763	0.233704	0.00844022
SUV420H1	472.224	0.233669	0.0147741
PGAP1	1052.25	0.233326	0.00132953
DDX31	485.492	0.232586	0.0109939
BHLHE41	670.757	0.232549	0.00298644
GLRX	705.297	0.232477	0.00284355
COPG1	2741.93	0.23215	1.08245e-05
AC092171.4	489.473	0.23191	0.0123249
POMGNT1	2203.74	0.231885	8.77278e-06
PMPCA	1457	0.231692	4.81744e-05
TXNDC11	437.29	0.230736	0.0155767
AP5Z1	631.778	0.2303	0.00589898
ZNF12	533.462	0.230263	0.0100682
ZXDC	335.721	0.22986	0.030945
SERINC3	4918.79	0.22954	5.04975e-07
ENGASE	600.398	0.229488	0.00516875
BBS2	1048.21	0.229454	0.000662846
ATXN7	363.75	0.229223	0.0272686
TUBB4A	407.141	0.228836	0.0224389
ACAP3	623.942	0.228591	0.00717682
PLIN3	2042.86	0.228588	0.000236321
MPDU1	743.777	0.228337	0.00301159
PDE2A	630.391	0.227755	0.00637258
PSMG4	402.829	0.227443	0.023391
MBTPS2	1074.24	0.227395	0.00229635
PPT2	329.18	0.227326	0.0350807
RPAIN	363.865	0.226678	0.0401754
SPTAN1	6266.05	0.226534	1.77639e-09
ZBTB25	438.359	0.226217	0.0174581
SERINC5	541.624	0.226129	0.011209
GSTZ1	373.664	0.225861	0.0262541
PKD1	781.283	0.225715	0.00365678
ZNF304	386.836	0.225473	0.0339772
ST3GAL4	2143.18	0.225208	8.97063e-06
CCDC47	3103.46	0.225107	1.31663e-05
TMEM8A	474.884	0.224556	0.0213091
GOLM1	2799.92	0.224554	1.88455e-06
NDEL1	552.217	0.224412	0.0106458
ENDOV	341.828	0.224336	0.0386115
RSPH3	341.699	0.224236	0.040541
ENO2	963.459	0.223904	0.000902998
TMEM50B	374.754	0.223837	0.0371923
IQSEC2	1180.48	0.223402	0.00218133
PLEKHG3	1361.79	0.223102	0.000148002
ANXA2	35038.9	0.222884	4.84572e-15
CD46	2184.93	0.222631	5.03035e-05
RUSC2	463.525	0.222513	0.0157608
SCARB2	1210.68	0.222245	0.000393319
RALGAPA1	564.703	0.222209	0.0197511
PTPLAD1	1471.13	0.221873	0.000126694
GPAM	558.433	0.221742	0.0124651
MOGS	1165.38	0.221519	0.00129811
CREG1	531.353	0.221166	0.0136393
ATP6V0B	1145.76	0.220548	0.00222774
FURIN	577.868	0.22041	0.0163888
ADCY6	640.288	0.220287	0.014791
CCNT2	789.942	0.220271	0.00274612
PLXNA2	1236.62	0.220224	0.00068134
HEATR3	674.752	0.220179	0.00862653
MCCC1	355.548	0.219755	0.0420195
KDM6B	635.614	0.219743	0.0100881
NRBP2	585.998	0.219738	0.0124428
UROS	895.214	0.219723	0.00172109
BLCAP	2295.72	0.219326	0.000164147
ESYT2	3863.49	0.2193	6.78403e-08
MGST3	1441.11	0.219049	0.00024397
MTCL1	852.747	0.219004	0.00347933
TRMT1	1203.93	0.218957	0.000782603
RPUSD4	404.155	0.21883	0.0304314
LPCAT4	984.485	0.218761	0.0011487
ENTPD4	732.85	0.218127	0.00385449
NOMO1	1274.51	0.217966	0.000354341
[truncated: 56,650 more rows]
